# Supplementary material for: FEM: mining biological meaning from cell level in single-cell RNA sequencing data
Source: PeerJ journal article supplement (doi:10.7717/peerj.12570), 2021-11-30

A

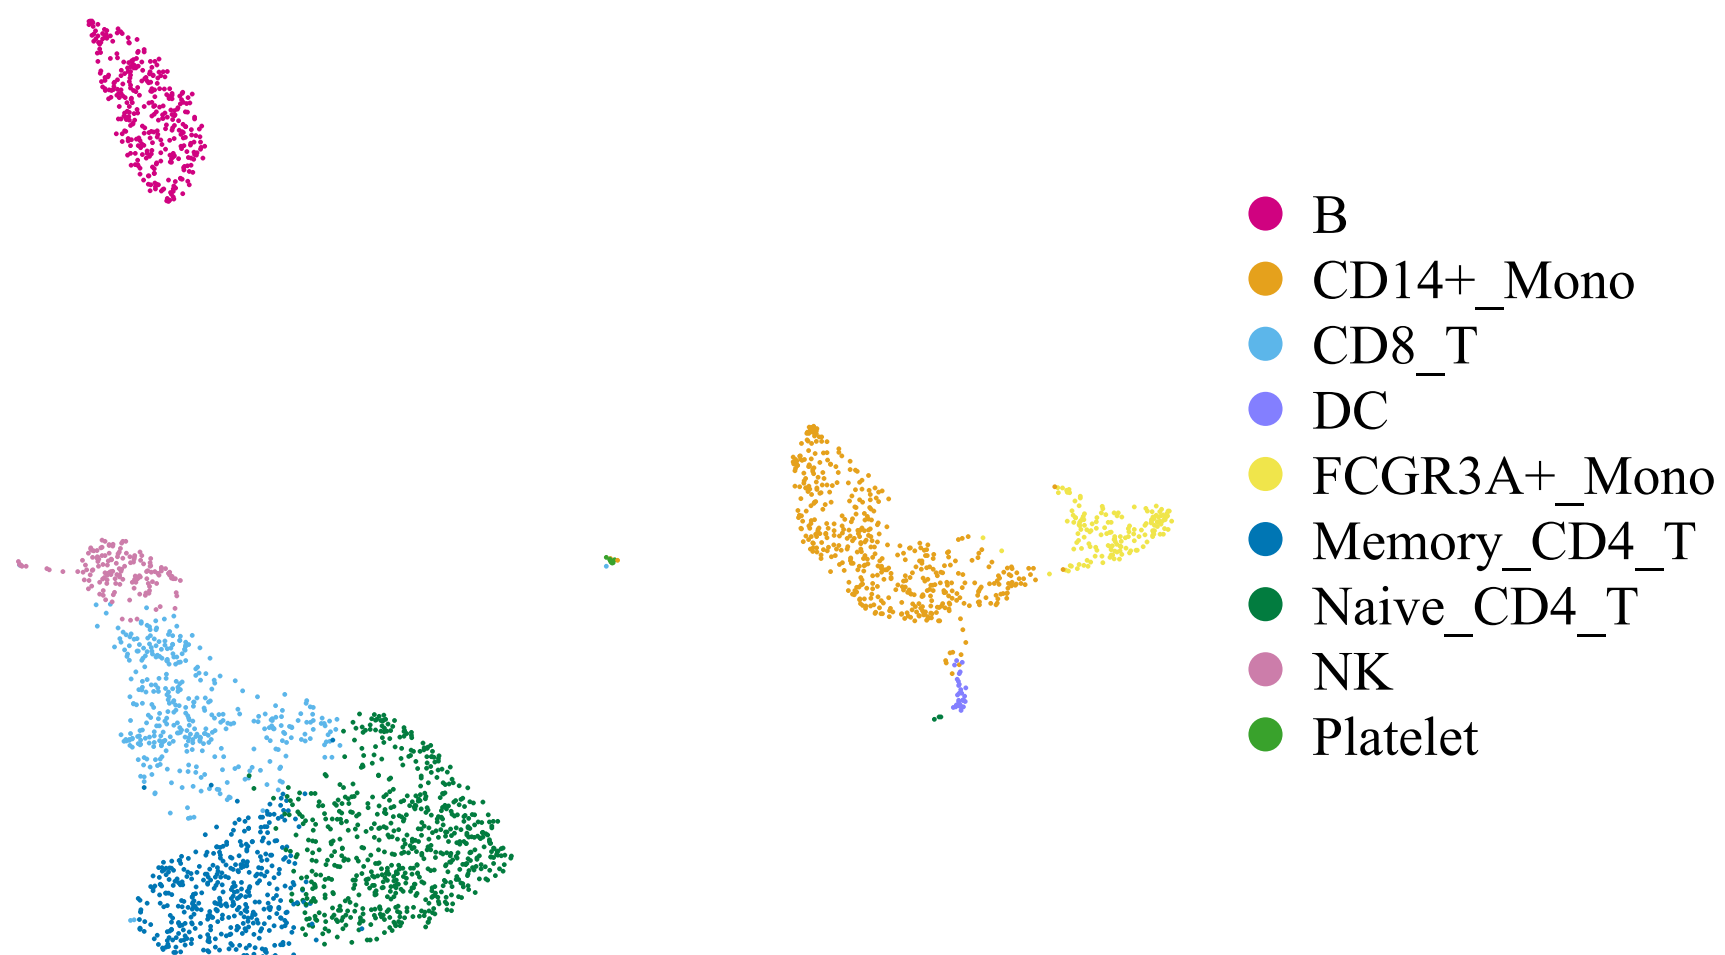

B

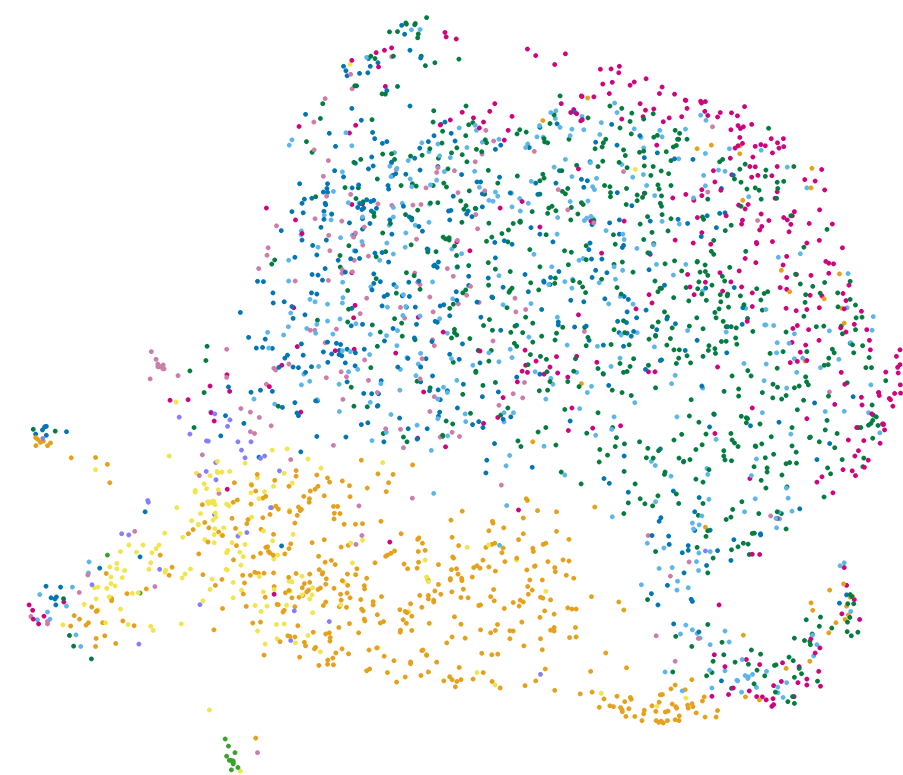

C

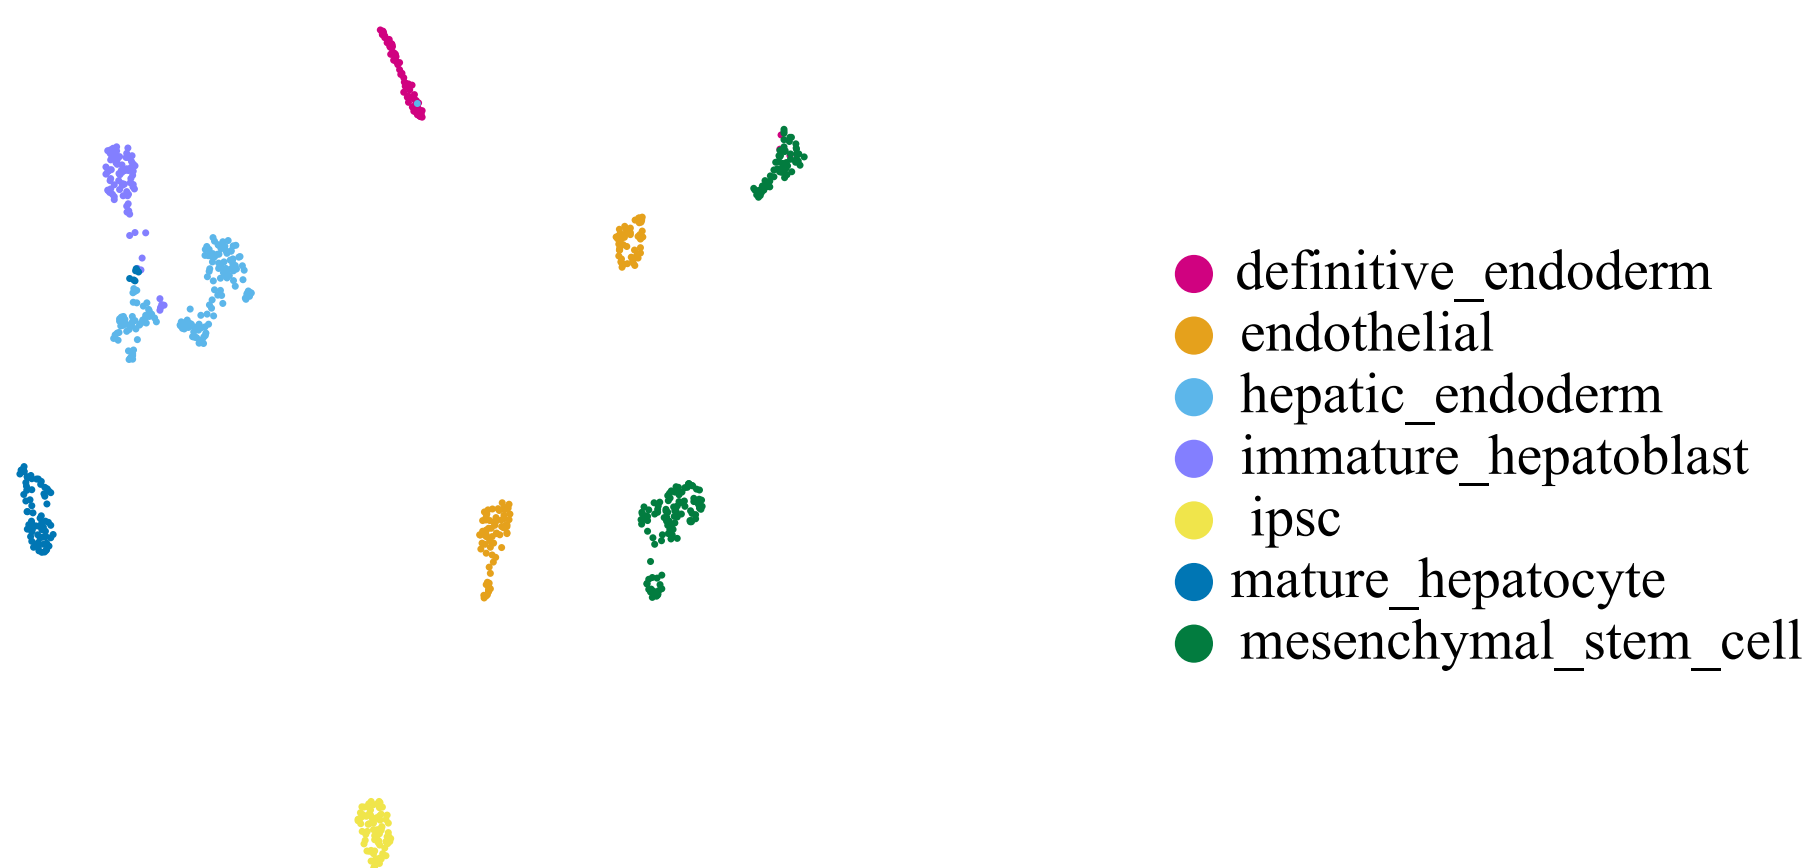

D

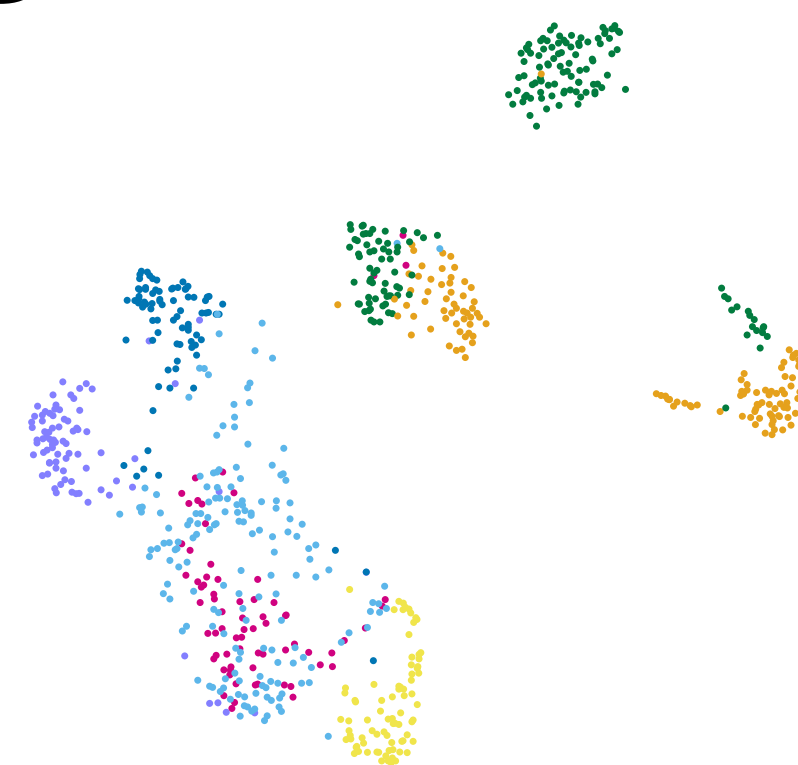

E

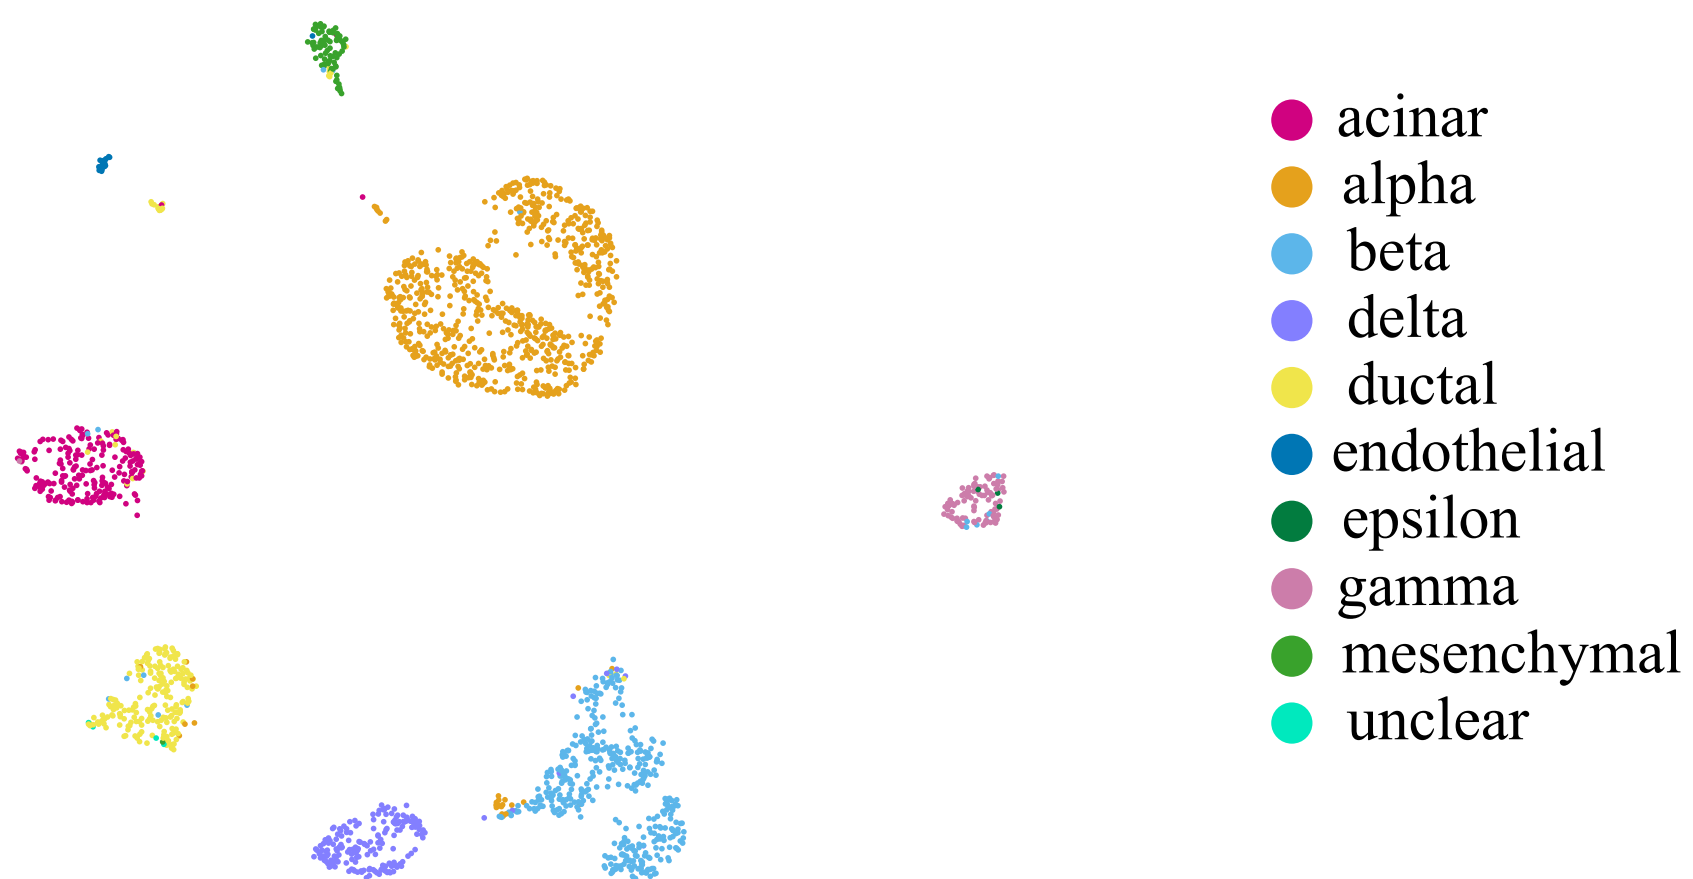

F

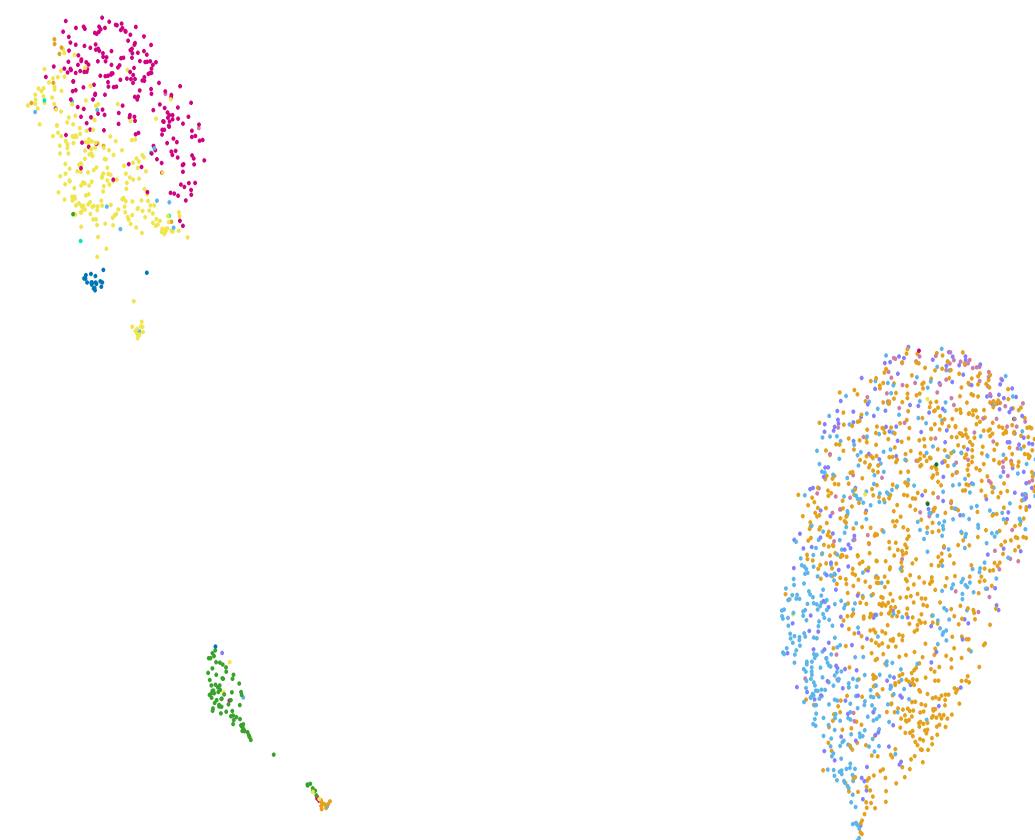

Supplement: f-s1_reactome.pdf [file f-s1_reactome.pdf]
