# Supplementary material for: FEM: mining biological meaning from cell level in single-cell RNA sequencing data
Source: PeerJ. 2021 Nov 30;9:e12570. doi: 10.7717/peerj.12570 (PMC8641482; doi:10.7717/peerj.12570)
Supplement: Supplemental Information 2 — REACTOME: Reactome pathway-based function cluster and it’s top five most significant pathways. REACTOME MM: gene-based cluster and the top five most significant pathways. GO: Reactome pathway-based function cluster and the top five most significant GO. GO MM: gene-based cluster and the top five most significant GO. [file peerj-09-12570-s002.xlsx]

## Sheet: table s1-1 PBMC
REACTOME FC-DEF
	sc	cluster\cell_type	NK	Platelet	Memory_CD4_T	DC	B	FCGR3A+_Mono	Naive_CD4_T	CD8_T	CD14+_Mono	top_1	top_pv_1	top_2	top_pv_2	top_3	top_pv_3	top_4	top_pv_4	top_5	top_pv_5
	0.283019	4	23	0	60	1	50	2	49	26	1	reactome-signaling-by-fgfr2-iiia-tm	1.22389e-118	reactome-fgfr2-mutant-receptor-activation	2.02777e-113	reactome-mrna-capping	5.22756e-102	reactome-piwi-interacting-rna-pirna-biogenesis	1.1587e-93	reactome-abortive-elongation-of-hiv-1-transcript-in-the-absence-of-tat	2.15307e-87
	0.411765	8	1	0	5	1	1	0	1	1	7	reactome-signaling-by-fgfr3-fusions-in-cancer	0	reactome-signaling-by-fgfr4-in-disease	0	reactome-activated-ntrk2-signals-through-frs2-and-frs3	0	reactome-frs-mediated-fgfr1-signaling	0	reactome-frs-mediated-fgfr3-signaling	0
	0.395238	2	5	0	31	0	49	0	166	150	19	reactome-regulation-of-fzd-by-ubiquitination	7.25527e-137	reactome-downregulation-of-erbb4-signaling	1.24259e-134	reactome-irak2-mediated-activation-of-tak1-complex	5.70505e-127	reactome-ticam1-traf6-dependent-induction-of-tak1-complex	3.33818e-124	reactome-inla-mediated-entry-of-listeria-monocytogenes-into-host-cells	6.6473e-123
	0.653025	1	22	0	4	30	5	124	3	7	367	reactome-regulation-of-tlr-by-endogenous-ligand	2.61503e-235	reactome-innate-immune-system	1.05019e-226	reactome-neutrophil-degranulation	1.66829e-226	reactome-trafficking-and-processing-of-endosomal-tlr	2.00958e-178	reactome-rho-gtpases-activate-nadph-oxidases	8.01459e-162
	0.42029	6	2	2	2	3	7	29	1	2	21	reactome-g-protein-gated-potassium-channels	1.03662e-177	reactome-inwardly-rectifying-kplus-channels	3.00643e-175	reactome-presynaptic-function-of-kainate-receptors	1.4539e-161	reactome-thromboxane-signalling-through-tp-receptor	7.32692e-149	reactome-adp-signalling-through-p2y-purinoceptor-1	1.50144e-138
	0.339901	5	3	11	6	0	32	4	48	30	69	reactome-developmental-biology	4.59411e-76	reactome-disease	3.94211e-70	reactome-axon-guidance	3.97575e-70	reactome-infectious-disease	2.00544e-66	reactome-metabolism-of-amino-acids-and-derivatives	2.57478e-63
	0.461818	3	6	0	42	0	46	1	127	51	2	reactome-deadenylation-dependent-mrna-decay	4.1606e-05	reactome-tp53-regulates-transcription-of-cell-cycle-genes	0.000860116	reactome-deadenylation-of-mrna	0.00242483	reactome-early-phase-of-hiv-life-cycle	1
	0.30752	0	86	0	265	0	188	0	274	72	6	reactome-degradation-of-beta-catenin-by-the-destruction-complex	6.46243e-56	reactome-mapk-family-signaling-cascades	3.51509e-53	reactome-g2-m-checkpoints	1.30608e-51	reactome-cell-cycle-checkpoints	3.58118e-51	reactome-cyclin-a:cdk2-associated-events-at-s-phase-entry	7.93292e-44
	0.294118	7	6	0	12	0	6	1	15	11	0	reactome-processive-synthesis-on-the-c-strand-of-the-telomere	5.106e-171	reactome-processive-synthesis-on-the-lagging-strand	7.93252e-162	reactome-mismatch-repair	6.09249e-123	reactome-lagging-strand-synthesis	3.60981e-117	reactome-dna-strand-elongation	4.15614e-82
REACTOME GC-DEF
	sc	cluster\cell_type	B	CD8_T	Memory_CD4_T	CD14+_Mono	FCGR3A+_Mono	Naive_CD4_T	Platelet	NK	DC	top_1	top_pv_1	top_2	top_pv_2	top_3	top_pv_3	top_4	top_pv_4	top_5	top_pv_5
	1	2	0	0	427	0	0	0	0	0	0	reactome-neurodegenerative-diseases	4.49802e-20	reactome-chk1-chk2-cds1-mediated-inactivation-of-cyclin-b:cdk1-complex	7.30859e-11	reactome-centrosome-maturation	1.42942e-07	reactome-integration-of-provirus	3.7491e-07	reactome-interleukin-2-signaling	3.85392e-06
	1	4	350	0	0	0	0	0	0	0	0	reactome-pd-1-signaling	2.15864e-139	reactome-translocation-of-zap-70-to-immunological-synapse	5.21651e-136	reactome-phosphorylation-of-cd3-and-tcr-zeta-chains	2.24245e-128	reactome-interferon-gamma-signaling	1.22282e-127	reactome-antigen-activates-b-cell-receptor-bcr-leading-to-generation-of-second-messengers	8.37678e-124
	1	1	0	0	0	492	0	0	0	0	0	reactome-regulation-of-tlr-by-endogenous-ligand	0	reactome-rho-gtpases-activate-nadph-oxidases	1.51763e-211	reactome-cross-presentation-of-particulate-exogenous-antigens-phagosomes	3.07651e-147	reactome-trafficking-and-processing-of-endosomal-tlr	6.36349e-101	reactome-dissolution-of-fibrin-clot	8.95764e-73
	1	3	0	384	0	0	0	0	0	0	0	reactome-immunoregulatory-interactions-between-a-lymphoid-and-a-non-lymphoid-cell	2.20476e-61	reactome-scavenging-by-class-a-receptors	0.0260578	reactome-nef-and-signal-transduction	0.120942	reactome-raf-activation	0.22015	reactome-ctla4-inhibitory-signaling	0.631284
	1	7	0	0	0	0	0	0	0	0	35	reactome-glutathione-conjugation	1.50969e-08	reactome-metabolism-of-lipids	1.0146e-05	reactome-metabolism-of-non-coding-rna	5.14482e-05	reactome-copii-mediated-vesicle-transport	0.000185466	reactome-trna-processing	0.443848
	1	5	0	0	0	0	161	0	0	0	0	reactome-rho-gtpases-activate-rhotekin-and-rhophilins	1.05351e-145	reactome-trafficking-and-processing-of-endosomal-tlr	1.32294e-65	reactome-g-protein-beta:gamma-signalling	5.99372e-34	reactome-rab-geranylgeranylation	3.03588e-18	reactome-g-alpha-12-13-signalling-events	2.59873e-17
	1	8	0	0	0	0	0	0	13	0	0	reactome-cell-junction-organization	2.9875e-07	reactome-runx1-regulates-genes-involved-in-megakaryocyte-differentiation-and-platelet-function	7.5206e-07	reactome-activated-pkn1-stimulates-transcription-of-ar-androgen-receptor-regulated-genes-klk2-and-klk3	9.47302e-07	reactome-sirt1-negatively-regulates-rrna-expression	1.48821e-06	reactome-dna-methylation	1.02213e-05
	1	0	0	0	0	0	0	684	0	0	0	reactome-deactivation-of-the-beta-catenin-transactivating-complex	5.14471e-34	reactome-tp53-regulates-transcription-of-cell-cycle-genes	8.54814e-25	reactome-tp53-regulates-transcription-of-additional-cell-cycle-genes-whose-exact-role-in-the-p53-pathway-remain-uncertain	1.65918e-14	reactome-interleukin-7-signaling	1.02416e-13	reactome-regulation-of-mecp2-expression-and-activity	0.3157
	1	6	0	0	0	0	0	0	0	154	0	reactome-intrinsic-pathway-for-apoptosis	3.70792e-15	reactome-interleukin-2-signaling	1.04237e-14	reactome-atf6-atf6-alpha-activates-chaperone-genes	9.13105e-12	reactome-interleukin-2-family-signaling	9.57809e-11	reactome-atf6-atf6-alpha-activates-chaperones	2.89184e-10
GO FC-DEF
	sc	cluster\cell_type	B	CD8_T	FCGR3A+_Mono	CD14+_Mono	Memory_CD4_T	Naive_CD4_T	Platelet	NK	DC	top_1	top_pv_1	top_2	top_pv_2	top_3	top_pv_3	top_4	top_pv_4	top_5	top_pv_5
	0.943452	3	0	0	18	317	0	0	0	0	1	go-protein-nitrosylation	8.65959e-217	go-extracellular-matrix	5.19895e-164	go-rage-receptor-binding	3.80208e-159	go-collagen-containing-extracellular-matrix	4.38334e-158	go-defense-response-to-fungus	5.48061e-158
	0.987654	4	320	1	0	0	1	2	0	0	0	go-mhc-class-ii-receptor-activity	2.55015e-284	go-mhc-class-ii-protein-complex	2.76604e-193	go-mhc-protein-complex	2.89498e-177	go-peptide-antigen-binding	1.36886e-174	go-lumenal-side-of-membrane	1.50631e-172
	0.572072	6	12	74	0	0	6	127	0	3	0	go-cytosolic-ribosome	9.76644e-118	go-nuclear-transcribed-mrna-catabolic-process-nonsense-mediated-decay	1.55699e-117	go-cotranslational-protein-targeting-to-membrane	1.71202e-117	go-nuclear-transcribed-mrna-catabolic-process	2.80973e-117	go-establishment-of-protein-localization-to-endoplasmic-reticulum	5.43168e-117
	0.533597	5	0	115	0	0	3	0	0	135	0	go-granzyme-mediated-apoptotic-signaling-pathway	8.22516e-239	go-positive-regulation-of-lymphocyte-chemotaxis	1.71958e-156	go-cytolysis	7.30645e-152	go-positive-regulation-of-natural-killer-cell-chemotaxis	2.00334e-144	go-regulation-of-lymphocyte-chemotaxis	6.63136e-144
	1	8	0	0	0	0	0	0	11	0	0	go-platelet-alpha-granule-membrane	2.23911e-157	go-protein-activation-cascade	3.12384e-54	go-structural-constituent-of-muscle	3.84212e-35	go-amyloid-fibril-formation	1.11859e-32	go-chemokine-activity	2.44211e-20
	0.27907	7	8	3	0	0	12	3	0	12	5	go-pyrimidine-deoxyribonucleoside-monophosphate-biosynthetic-process	9.81341e-73	go-kinetochore-organization	1.72286e-63	go-branched-chain-amino-acid-catabolic-process	8.18819e-61	go-mitotic-recombination	1.83088e-60	go-c-acetyltransferase-activity	1.85215e-60
	0.502874	2	0	0	143	175	0	0	1	0	29	go-immunoglobulin-binding	5.60841e-236	go-igg-binding	2.13107e-226	go-regulation-of-dendritic-cell-differentiation	6.35957e-226	go-inflammatory-response-to-wounding	8.10204e-208	go-t-cell-activation-via-t-cell-receptor-contact-with-antigen-bound-to-mhc-molecule-on-antigen-presenting-cell	6.05226e-206
	0.681892	0	2	77	0	0	116	418	0	0	0	go-rna-binding	3.64222e-104	go-t-cell-differentiation-in-thymus	4.85253e-92	go-ribonucleoprotein-complex	2.57537e-85	go-ribonucleoprotein-complex-subunit-organization	4.75297e-82	go-ribonucleoprotein-complex-biogenesis	7.36026e-80
	0.525455	1	8	114	0	0	289	134	1	4	0	go-t-cell-differentiation	7.86684e-94	go-lymphocyte-differentiation	4.53794e-77	go-t-cell-receptor-complex	3.01031e-63	go-regulation-of-lymphocyte-differentiation	7.25958e-62	go-negative-regulation-of-t-cell-apoptotic-process	1.69079e-61
GO GC-FEM
	sc	cluster\cell_type	B	CD8_T	Memory_CD4_T	CD14+_Mono	FCGR3A+_Mono	Naive_CD4_T	Platelet	NK	DC	top_1	top_pv_1	top_2	top_pv_2	top_3	top_pv_3	top_4	top_pv_4	top_5	top_pv_5
	1	2	0	0	427	0	0	0	0	0	0	go-positive-t-cell-selection	5.50639e-40	go-positive-thymic-t-cell-selection	1.8027e-37	go-t-cell-receptor-binding	1.88803e-37	go-alpha-beta-t-cell-receptor-complex	7.88979e-35	go-positive-regulation-of-t-cell-receptor-signaling-pathway	3.61933e-33
	1	4	350	0	0	0	0	0	0	0	0	go-mhc-class-ii-receptor-activity	1.30777e-299	go-mhc-class-ii-protein-complex	1.93988e-207	go-clathrin-coated-endocytic-vesicle-membrane	8.59771e-183	go-clathrin-coated-endocytic-vesicle	1.39586e-174	go-mhc-protein-complex-assembly	2.38719e-173
	1	1	0	0	0	492	0	0	0	0	0	go-collagen-containing-extracellular-matrix	3.17225e-235	go-rage-receptor-binding	1.42131e-226	go-chemokine-production	1.61132e-211	go-defense-response-to-bacterium	9.85902e-194	go-neutrophil-migration	2.36093e-187
	1	3	0	384	0	0	0	0	0	0	0	go-cytolysis	2.6117e-64	go-t-cell-receptor-complex	7.62263e-53	go-negative-regulation-by-host-of-viral-transcription	5.7126e-39	go-regulation-of-cell-cell-adhesion-mediated-by-integrin	1.49822e-36	go-t-cell-receptor-binding	4.1854e-29
	1	7	0	0	0	0	0	0	0	0	35	go-ige-binding	4.78015e-241	go-t-cell-activation-via-t-cell-receptor-contact-with-antigen-bound-to-mhc-molecule-on-antigen-presenting-cell	6.79988e-23	go-mhc-class-ii-receptor-activity	1.47626e-14	go-hydrolase-activity-acting-on-ester-bonds	0.000372895	go-lipid-metabolic-process	0.000529377
	1	5	0	0	0	0	161	0	0	0	0	go-igg-binding	9.12784e-143	go-negative-regulation-of-leukocyte-proliferation	4.70503e-60	go-regulation-of-mast-cell-activation	7.62404e-59	go-regulation-of-mast-cell-activation-involved-in-immune-response	1.83072e-58	go-dendritic-cell-differentiation	2.99701e-58
	1	8	0	0	0	0	0	0	13	0	0	go-platelet-alpha-granule-membrane	6.75289e-158	go-platelet-alpha-granule	4.93941e-06	go-platelet-degranulation	5.90206e-06	go-platelet-alpha-granule-lumen	6.22984e-06	go-contractile-fiber	8.58249e-06
	1	0	0	0	0	0	0	684	0	0	0	go-t-cell-differentiation-in-thymus	5.58488e-123	go-thymic-t-cell-selection	4.23107e-87	go-positive-regulation-of-t-cell-receptor-signaling-pathway	2.05931e-58	go-t-cell-receptor-complex	2.17704e-57	go-negative-t-cell-selection	1.5149e-39
	1	6	0	0	0	0	0	0	0	154	0	go-granzyme-mediated-apoptotic-signaling-pathway	2.09823e-190	go-cytolytic-granule	1.03374e-150	go-positive-regulation-of-natural-killer-cell-chemotaxis	6.26596e-128	go-cytolysis	6.90645e-97	go-ccr5-chemokine-receptor-binding	9.03318e-58

## Sheet: table s1-2 LIVER
REACTOME FC-DEF
	sc	cluster\cell_type	endothelial	ipsc	immature_hepatoblast	mature_hepatocyte	definitive_endoderm	mesenchymal_stem_cell	hepatic_endoderm	top_1	top_pv_1	top_2	top_pv_2	top_3	top_pv_3	top_4	top_pv_4	top_5	top_pv_5
	0.520661	1	53	0	0	2	3	63	0	reactome-interleukin-4-and-interleukin-13-signaling	8.36547e-69	reactome-interferon-alpha-beta-signaling	8.76009e-66	reactome-cytokine-signaling-in-immune-system	1.90489e-58	reactome-signaling-by-interleukins	1.93335e-56	reactome-adaptive-immune-system	7.04333e-54
	0.66474	0	1	2	10	9	36	0	115	reactome-regulation-of-signaling-by-nodal	8.42384e-33	reactome-signaling-by-nodal	1.54345e-31	reactome-transcriptional-regulation-of-pluripotent-stem-cells	6.28751e-21	reactome-fgfr2-alternative-splicing	8.45631e-19	reactome-generic-transcription-pathway	4.6476e-18
	0.917808	5	0	0	1	67	0	0	5	reactome-biological-oxidations	2.96953e-100	reactome-formation-of-fibrin-clot-clotting-cascade	2.30291e-76	reactome-intrinsic-pathway-of-fibrin-clot-formation	1.90974e-74	reactome-activation-of-c3-and-c5	2.44429e-67	reactome-common-pathway-of-fibrin-clot-formation	4.45253e-65
	0.558824	6	0	0	5	1	24	0	38	reactome-phosphorylation-of-emi1	2.74544e-26	reactome-g2-m-dna-replication-checkpoint	5.78292e-25	reactome-regulation-of-tp53-activity-through-phosphorylation	9.46558e-25	reactome-regulation-of-tp53-activity	1.1348e-23	reactome-mitotic-prometaphase	1.95318e-23
	0.829787	3	0	78	0	0	7	0	9	reactome-pou5f1-oct4-sox2-nanog-activate-genes-related-to-proliferation	1.20347e-49	reactome-g2-m-checkpoints	2.22117e-45	reactome-chromosome-maintenance	3.21933e-43	reactome-g2-m-dna-damage-checkpoint	2.02454e-41	reactome-cell-cycle-checkpoints	1.03397e-40
	0.970149	7	0	0	65	2	0	0	0	reactome-plasma-lipoprotein-remodeling	1.38559e-35	reactome-chylomicron-clearance	1.49815e-34	reactome-vldl-assembly	1.61574e-33	reactome-metabolism-of-lipids	6.09727e-30	reactome-hdl-clearance	2.60467e-29
	0.837209	4	72	0	0	0	0	14	0	reactome-rna-polymerase-iii-transcription-termination	4.47823e-32	reactome-nuclear-envelope-breakdown	7.08822e-30	reactome-sumoylation-of-dna-damage-response-and-repair-proteins	2.11867e-29	reactome-cell-cycle-mitotic	3.32022e-24	reactome-nuclear-pore-complex-npc-disassembly	5.47319e-24
	0.989474	2	1	0	0	0	0	94	0	reactome-extracellular-matrix-organization	5.25451e-48	reactome-elastic-fibre-formation	3.73417e-43	reactome-syndecan-interactions	1.23205e-41	reactome-transcriptional-regulation-by-runx3	1.25424e-36	reactome-signaling-by-notch4	8.93375e-33
REACTOME GC-DEF
	sc	cluster\cell_type	hepatic_endoderm	endothelial	mesenchymal_stem_cell	immature_hepatoblast	mature_hepatocyte	definitive_endoderm	ipsc	top_1	top_pv_1	top_2	top_pv_2	top_3	top_pv_3	top_4	top_pv_4	top_5	top_pv_5
	1	5	0	0	0	0	73	0	0	reactome-gluconeogenesis	1.753e-11	reactome-signaling-by-bmp	4.50408e-09	reactome-apoptotic-cleavage-of-cell-adhesion-proteins	8.99684e-09	reactome-transport-of-nucleosides-and-free-purine-and-pyrimidine-bases-across-the-plasma-membrane	1.51022e-08	reactome-bbsome-mediated-cargo-targeting-to-cilium	1.75685e-08
	1	2	0	0	0	0	0	0	80	reactome-rna-polymerase-iii-transcription-termination	7.02861e-32	reactome-darpp-32-events	1.44955e-16	reactome-trna-modification-in-the-nucleus-and-cytosol	7.15529e-15	reactome-unwinding-of-dna	2.67581e-14	reactome-g0-and-early-g1	2.67142e-09
	1	1	0	0	88	0	0	0	0	reactome-pou5f1-oct4-sox2-nanog-activate-genes-related-to-proliferation	1.98675e-56	reactome-g1-s-specific-transcription	8.70248e-31	reactome-resolution-of-d-loop-structures-through-synthesis-dependent-strand-annealing-sdsa	2.09519e-29	reactome-base-excision-repair	2.89623e-25	reactome-nucleosome-assembly	2.38536e-22
	1	9	0	53	0	0	0	0	0	reactome-tp53-regulates-transcription-of-death-receptors-and-ligands	1.00564e-15	reactome-hemostasis	3.19323e-15	reactome-trail-signaling	6.28784e-14	reactome-pecam1-interactions	2.91923e-13	reactome-interleukin-15-signaling	2.95315e-11
	0.954545	8	0	0	63	0	0	3	0	reactome-collagen-biosynthesis-and-modifying-enzymes	7.51537e-41	reactome-interferon-alpha-beta-signaling	1.20277e-40	reactome-assembly-of-collagen-fibrils-and-other-multimeric-structures	5.68668e-40	reactome-interleukin-4-and-interleukin-13-signaling	2.37997e-37	reactome-integrin-cell-surface-interactions	9.16357e-37
	0.739726	4	54	0	0	11	8	0	0	reactome-plasma-lipoprotein-remodeling	1.67467e-59	reactome-chylomicron-remodeling	1.05264e-43	reactome-metabolism-of-fat-soluble-vitamins	1.70737e-39	reactome-hdl-remodeling	8.29626e-39	reactome-plasma-lipoprotein-assembly-remodeling-and-clearance	2.06363e-37
	0.985294	7	1	0	0	0	0	67	0	reactome-regulation-of-signaling-by-nodal	1.0787e-41	reactome-signaling-by-nodal	4.76976e-15	reactome-g2-m-dna-replication-checkpoint	5.6442e-11	reactome-early-phase-of-hiv-life-cycle	7.23213e-11	reactome-e2f-enabled-inhibition-of-pre-replication-complex-formation	5.30156e-08
	1	6	0	0	0	69	0	0	0	reactome-vldl-assembly	2.16754e-35	reactome-fatty-acid-metabolism	6.05875e-28	reactome-chylomicron-assembly	3.84135e-27	reactome-plasma-lipoprotein-assembly-remodeling-and-clearance	2.80144e-26	reactome-plasma-lipoprotein-assembly	3.44595e-26
	0.99115	0	112	0	0	1	0	0	0	reactome-extracellular-matrix-organization	9.36626e-47	reactome-elastic-fibre-formation	2.60149e-43	reactome-syndecan-interactions	2.37774e-40	reactome-molecules-associated-with-elastic-fibres	3.64195e-31	reactome-signaling-by-pdgf	5.89906e-29
	1	3	0	74	0	0	0	0	0	reactome-tp53-regulates-transcription-of-additional-cell-cycle-genes-whose-exact-role-in-the-p53-pathway-remain-uncertain	1.15505e-06	reactome-regulation-of-foxo-transcriptional-activity-by-acetylation	1.96972e-06	reactome-transcriptional-regulation-by-the-ap-2-tfap2-family-of-transcription-factors	3.39194e-06	reactome-influenza-infection	2.09064e-05	reactome-scavenging-by-class-a-receptors	2.52874e-05
	1	10	0	0	20	0	0	0	0	reactome-phosphorylation-of-emi1	3.75321e-14	reactome-condensation-of-prometaphase-chromosomes	2.16187e-13	reactome-polo-like-kinase-mediated-events	2.03569e-12	reactome-g2-m-dna-replication-checkpoint	2.32565e-11	reactome-chromosome-maintenance	4.21409e-11
GO FC-DEF
	sc	cluster\cell_type	immature_hepatoblast	definitive_endoderm	endothelial	mesenchymal_stem_cell	ipsc	hepatic_endoderm	mature_hepatocyte	top_1	top_pv_1	top_2	top_pv_2	top_3	top_pv_3	top_4	top_pv_4	top_5	top_pv_5
	0.940299	7	0	3	1	63	0	0	0	go-tumor-necrosis-factor-superfamily-cytokine-production	8.88518e-71	go-defense-response	9.71708e-63	go-response-to-molecule-of-bacterial-origin	6.70687e-59	go-leukocyte-cell-cell-adhesion	1.50959e-57	go-response-to-biotic-stimulus	3.5033e-54
	0.962963	8	0	0	52	0	0	2	0	go-trail-binding	3.20944e-32	go-blood-vessel-endothelial-cell-migration	3.26532e-31	go-response-to-biotic-stimulus	6.94924e-31	go-endothelial-cell-migration	6.43896e-29	go-endothelium-development	3.59135e-26
	0.986486	4	0	0	73	1	0	0	0	go-catalytic-activity-acting-on-rna	1.79554e-26	go-rna-phosphodiester-bond-hydrolysis	2.18484e-25	go-ncrna-processing	1.03167e-24	go-ncrna-metabolic-process	2.50517e-24	go-rrna-metabolic-process	8.06478e-24
	0.933333	3	2	0	0	0	0	3	70	go-apical-plasma-membrane	2.04565e-94	go-hormone-metabolic-process	3.96961e-82	go-blood-microparticle	3.46764e-79	go-organic-anion-transport	2.68134e-73	go-acute-phase-response	1.67595e-72
	0.721591	0	10	31	0	0	0	127	8	go-axis-specification	7.94721e-44	go-anterior-posterior-axis-specification	2.56536e-42	go-primitive-streak-formation	2.97491e-40	go-rna-splicing	2.58883e-34	go-gastrulation-with-mouth-forming-second	1.23906e-32
	1	2	0	0	0	0	80	0	0	go-ncrna-metabolic-process	1.09889e-36	go-ncrna-processing	7.37067e-36	go-dna-replication-initiation	1.6395e-34	go-ribosome-biogenesis	1.91952e-34	go-transferase-activity-transferring-one-carbon-groups	4.64229e-34
	0.98913	1	0	0	1	91	0	0	0	go-peptidyl-lysine-oxidation	1.95696e-81	go-protein-lysine-6-oxidase-activity	1.95696e-81	go-extracellular-matrix-structural-constituent	2.96443e-60	go-collagen-fibril-organization	1.02902e-51	go-connective-tissue-development	1.22454e-50
	1	9	0	0	0	16	0	0	0	go-peptidyl-lysine-oxidation	3.3701e-09	go-protein-lysine-6-oxidase-activity	3.3701e-09	go-regulation-of-cell-cycle	2.10213e-06	go-regulation-of-mitotic-cell-cycle	2.79265e-06	go-negative-regulation-of-mitotic-cell-cycle	7.95329e-06
	0.943662	6	67	0	0	0	0	1	3	go-regulation-of-very-low-density-lipoprotein-particle-remodeling	5.20379e-36	go-coenzyme-binding	2.23601e-33	go-cofactor-binding	5.32181e-33	go-mitochondrial-part	8.02848e-32	go-microbody	1.35308e-31
	0.5	5	2	36	0	0	0	34	0	go-cytoskeletal-part	9.28011e-32	go-microtubule-cytoskeleton	7.92475e-31	go-microtubule-based-process	3.77959e-30	go-chromosome-centromeric-region	1.90946e-29	go-kinetochore	3.08743e-29
GO GC-FEM
	sc	cluster\cell_type	hepatic_endoderm	endothelial	mesenchymal_stem_cell	immature_hepatoblast	mature_hepatocyte	definitive_endoderm	ipsc	top_1	top_pv_1	top_2	top_pv_2	top_3	top_pv_3	top_4	top_pv_4	top_5	top_pv_5
	1	5	0	0	0	0	73	0	0	go-apical-part-of-cell	3.41804e-56	go-protein-containing-complex-remodeling	5.23144e-52	go-high-density-lipoprotein-particle	7.52127e-42	go-chylomicron	1.41237e-40	go-protein-lipid-complex	6.77554e-40
	1	2	0	0	0	0	0	0	80	go-dna-replication-initiation	1.77192e-34	go-single-stranded-dna-dependent-atpase-activity	1.61787e-33	go-dna-replication-origin-binding	2.72777e-33	go-positive-regulation-of-cell-cycle-g2-m-phase-transition	7.81234e-32	go-replication-fork-protection-complex	1.63481e-29
	1	1	0	0	88	0	0	0	0	go-collagen-fibril-organization	1.22686e-50	go-skeletal-system-development	7.68919e-48	go-extracellular-matrix-component	4.9593e-41	go-ossification	1.1302e-39	go-platelet-derived-growth-factor-binding	3.79672e-38
	1	9	0	53	0	0	0	0	0	go-endothelial-cell-migration	3.00594e-28	go-endothelium-development	8.12351e-25	go-regulation-of-epithelial-cell-migration	2.43541e-24	go-regulation-of-endothelial-cell-migration	1.40682e-23	go-tissue-migration	3.61094e-23
	0.954545	8	0	0	63	0	0	3	0	go-defense-response	3.82556e-61	go-innate-immune-response	3.95355e-42	go-cytokine-production	2.22694e-38	go-regulation-of-immune-response	4.2763e-36	go-regulation-of-immune-system-process	3.21727e-33
	0.739726	4	54	0	0	11	8	0	0	go-sex-differentiation	1.89965e-11	go-dna-binding-transcription-factor-activity	6.48799e-11	go-sequence-specific-dna-binding	9.85566e-11	go-regulation-of-retinoic-acid-receptor-signaling-pathway	2.51059e-10	go-epithelium-development	3.44262e-10
	0.985294	7	1	0	0	0	0	67	0	go-coreceptor-activity-involved-in-wnt-signaling-pathway-planar-cell-polarity-pathway	3.00394e-18	go-primitive-streak-formation	1.34223e-17	go-gastrulation	1.61845e-17	go-axis-specification	8.97192e-14	go-gastrulation-with-mouth-forming-second	2.91304e-13
	1	6	0	0	0	69	0	0	0	go-organic-acid-catabolic-process	1.18629e-30	go-very-low-density-lipoprotein-particle-assembly	4.04743e-30	go-lipid-modification	5.64454e-30	go-cellular-amino-acid-catabolic-process	8.76526e-28	go-lipid-catabolic-process	9.73438e-28
	0.99115	0	112	0	0	1	0	0	0	go-tube-formation	6.68328e-25	go-g-quadruplex-rna-binding	2.45244e-19	go-morphogenesis-of-embryonic-epithelium	6.55076e-18	go-tube-closure	1.26404e-14	go-regulation-of-establishment-or-maintenance-of-cell-polarity	7.2461e-12
	1	3	0	74	0	0	0	0	0	go-rna-phosphodiester-bond-hydrolysis-endonucleolytic	4.97087e-22	go-purine-ribonucleoside-salvage	5.59473e-17	go-maturation-of-ssu-rrna-from-tricistronic-rrna-transcript-ssu-rrna-5-8s-rrna-lsu-rrna-	1.51769e-14	go-ciliary-transition-fiber	9.35555e-14	go-definitive-hemopoiesis	4.47406e-07
	1	10	0	0	20	0	0	0	0	go-microtubule-end	1.91108e-05	go-bleb-assembly	0.000560808	go-meiotic-cell-cycle-process	0.00058695	go-condensin-complex	0.000610337	go-female-meiotic-nuclear-division	0.0141477

## Sheet: table s1-3 PANCREAS
REACTOME FC-DEF
	sc	cluster\cell_type	acinar	ductal	delta	alpha	beta	gamma	endothelial	epsilon	unclear	mesenchymal	top_1	top_pv_1	top_2	top_pv_2	top_3	top_pv_3	top_4	top_pv_4	top_5	top_pv_5
	0.575758	9	0	13	0	0	1	0	19	0	0	0	reactome-phosphorylation-of-cd3-and-tcr-zeta-chains	3.51236e-152	reactome-generation-of-second-messenger-molecules	7.81461e-121	reactome-regulation-of-tlr-by-endogenous-ligand	1.09977e-62	reactome-interleukin-10-signaling	4.39643e-25	reactome-irak4-deficiency-tlr2-4	4.8854e-23		0.575758
	0.409091	10	3	2	0	8	0	0	0	0	0	9	reactome-chromosome-maintenance	3.6294e-141	reactome-phosphorylation-of-emi1	4.47965e-81	reactome-unwinding-of-dna	5.93667e-72	reactome-resolution-of-d-loop-structures	6.08258e-60	reactome-dna-replication-initiation	9.93774e-43		0.409091
	0.704626	2	0	2	32	46	198	3	0	0	0	0	reactome-antigen-processing:-ubiquitination-proteasome-degradation	7.39377e-53	reactome-s-phase	9.29841e-48	reactome-neddylation	3.24456e-47	reactome-cell-cycle	2.1242e-43	reactome-cyclin-a:cdk2-associated-events-at-s-phase-entry	4.18758e-37		0.704626
	0.571956	3	0	0	42	155	27	46	0	1	0	0	reactome-nonsense-mediated-decay-nmd-independent-of-the-exon-junction-complex-ejc	8.84836e-130	reactome-nonsense-mediated-decay-nmd	4.31652e-128	reactome-srp-dependent-cotranslational-protein-targeting-to-membrane	4.93661e-127	reactome-selenoamino-acid-metabolism	1.88833e-125	reactome-eukaryotic-translation-initiation	3.66171e-124		0.571956
	0.482993	7	66	71	0	1	5	1	1	0	2	0	reactome-biological-oxidations	5.73557e-89	reactome-tight-junction-interactions	7.49749e-85	reactome-innate-immune-system	3.67513e-68	reactome-signaling-by-interleukins	6.51844e-66	reactome-cytokine-signaling-in-immune-system	1.6875e-64		0.482993
	0.82996	4	0	0	24	205	17	1	0	0	0	0	reactome-viral-messenger-rna-synthesis	1.19423e-54	reactome-export-of-viral-ribonucleoproteins-from-nucleus	2.95628e-49	reactome-sumoylation-of-sumoylation-proteins	4.72191e-47	reactome-transport-of-the-slbp-dependant-mature-mrna	4.81551e-45	reactome-transport-of-mature-transcript-to-cytoplasm	7.21825e-45		0.82996
	0.921053	8	1	3	0	0	1	0	1	0	0	70	reactome-collagen-biosynthesis-and-modifying-enzymes	0	reactome-collagen-degradation	0	reactome-collagen-chain-trimerization	0	reactome-dermatan-sulfate-biosynthesis	0	reactome-collagen-formation	1.09839e-256		0.921053
	0.603604	0	2	1	50	201	54	24	0	1	0	0	reactome-regulation-of-expression-of-slits-and-robos	7.48283e-75	reactome-signaling-by-robo-receptors	9.8327e-68	reactome-developmental-biology	1.9815e-51	reactome-adp-signalling-through-p2y-purinoceptor-12	8.96056e-51	reactome-synthesis-secretion-and-inactivation-of-glucose-dependent-insulinotropic-polypeptide-gip	2.29234e-49		0.603604
	0.485531	1	147	151	0	7	3	0	0	0	2	1	reactome-cytokine-signaling-in-immune-system	2.58357e-98	reactome-trail-signaling	3.05759e-96	reactome-laminin-interactions	4.91458e-96	reactome-interferon-signaling	3.45077e-87	reactome-transcriptional-regulation-by-runx3	1.41834e-86		0.485531
	0.530806	5	0	1	24	57	112	16	0	1	0	0	reactome-regulation-of-gene-expression-in-beta-cells	1.22032e-33	reactome-regulation-of-beta-cell-development	9.2537e-29	reactome-incretin-synthesis-secretion-and-inactivation	2.79774e-23	reactome-negative-regulation-of-fgfr1-signaling	5.57492e-23	reactome-foxo-mediated-transcription-of-oxidative-stress-metabolic-and-neuronal-genes	8.11651e-22		0.530806
	0.680412	6	0	1	21	132	30	10	0	0	0	0	reactome-cooperation-of-pdcl-phlp1-and-tric-cct-in-g-protein-beta-folding	6.09355e-09	reactome-signaling-by-insulin-receptor	0.000228965	reactome-regulation-of-mecp2-expression-and-activity	0.00026835	reactome-raf-activation	0.00069108	reactome-runx1-regulates-transcription-of-genes-involved-in-differentiation-of-hscs	0.00453744		0.680412
REACTOME GC-DEF
	sc	cluster\cell_type	acinar	mesenchymal	unclear	delta	alpha	gamma	beta	endothelial	ductal	epsilon	top_1	top_pv_1	top_2	top_pv_2	top_3	top_pv_3	top_4	top_pv_4	top_5	top_pv_5
	0.993289	7	0	0	0	1	0	0	148	0	0	0	reactome-regulation-of-gene-expression-in-beta-cells	5.04123e-52	reactome-regulation-of-beta-cell-development	2.78083e-38	reactome-akt-phosphorylates-targets-in-the-cytosol	2.55638e-11	reactome-robo-receptors-bind-akap5	3.1849e-10	reactome-beta-oxidation-of-decanoyl-coa-to-octanoyl-coa-coa	1.95053e-08		0.993289
	1	6	0	0	0	185	0	0	0	0	0	0	reactome-incretin-synthesis-secretion-and-inactivation	2.28641e-26	reactome-crmps-in-sema3a-signaling	6.39045e-22	reactome-synthesis-secretion-and-deacylation-of-ghrelin	1.00204e-18	reactome-peptide-hormone-metabolism	3.31054e-18	reactome-uptake-and-actions-of-bacterial-toxins	2.65801e-17		1
	0.925234	8	0	0	0	0	0	99	6	0	0	2	reactome-inwardly-rectifying-kplus-channels	4.34535e-36	reactome-gaba-synthesis-release-reuptake-and-degradation	1.34702e-29	reactome-ca2plus-pathway	9.33231e-26	reactome-protein-methylation	1.14933e-25	reactome-reduction-of-cytosolic-caplusplus-levels	2.56433e-24		0.925234
	0.925764	4	1	1	4	0	6	0	5	0	212	0	reactome-type-i-hemidesmosome-assembly	2.57776e-107	reactome-signaling-by-hippo	5.69457e-73	reactome-non-integrin-membrane-ecm-interactions	8.68598e-54	reactome-cell-cell-communication	5.37203e-52	reactome-cell-junction-organization	2.9955e-30		0.925764
	0.995455	5	0	0	0	0	219	0	0	0	0	1	reactome-adp-signalling-through-p2y-purinoceptor-12	1.83399e-57	reactome-g-alpha-z-signalling-events	5.66364e-57	reactome-prostacyclin-signalling-through-prostacyclin-receptor	2.06172e-54	reactome-g-protein-activation	2.08564e-53	reactome-negative-regulation-of-fgfr4-signaling	3.97884e-53		0.995455
	0.9375	12	0	0	0	0	0	0	1	0	15	0	reactome-interleukin-10-signaling	1.58773e-59	reactome-gpvi-mediated-activation-cascade	6.66596e-08	reactome-interleukin-2-family-signaling	5.47752e-07	reactome-interleukin-4-and-interleukin-13-signaling	1.14653e-06	reactome-interferon-gamma-signaling	2.77146e-06		0.9375
	0.996904	0	0	0	0	0	322	0	1	0	0	0	reactome-attachment-of-gpi-anchor-to-upar	5.97372e-16	reactome-sphingolipid-metabolism	4.65318e-12	reactome-synthesis-of-ip2-ip-and-ins-in-the-cytosol	2.29365e-09	reactome-synthesis-of-wybutosine-at-g37-of-trna-phe	7.56854e-09	reactome-rna-polymerase-iii-chain-elongation	6.18248e-06		0.996904
	0.926357	1	0	0	0	3	16	0	239	0	0	0	reactome-regulation-of-gene-expression-in-beta-cells	7.4751e-48	reactome-regulation-of-beta-cell-development	1.01899e-25	reactome-activation-of-nmda-receptors-and-postsynaptic-events	1.83041e-13	reactome-negative-regulation-of-tcf-dependent-signaling-by-dvl-interacting-proteins	2.05781e-11	reactome-synthesis-of-pips-at-the-early-endosome-membrane	1.76238e-06		0.926357
	0.939394	3	217	0	0	0	1	2	3	0	8	0	reactome-digestion-of-dietary-lipid	1.13111e-204	reactome-metabolism-of-vitamins-and-cofactors	5.00102e-58	reactome-glutathione-conjugation	2.36888e-56	reactome-metabolism-of-water-soluble-vitamins-and-cofactors	6.27908e-28	reactome-cobalamin-cbl-vitamin-b12-transport-and-metabolism	4.56028e-25		0.939394
	1	11	0	0	0	0	0	0	0	20	0	0	reactome-signaling-by-notch1-t-7-9-notch1:m1580-k2555-translocation-mutant	1.84771e-25	reactome-rho-gtpase-cycle	5.25726e-09	reactome-signaling-by-notch1-hd-domain-mutants-in-cancer	7.09401e-09	reactome-hemostasis	3.5493e-06	reactome-pecam1-interactions	0.000328415		1
	0.807692	10	0	0	0	4	2	0	42	0	4	0	reactome-perk-regulates-gene-expression	4.65958e-13	reactome-atf4-activates-genes-in-response-to-endoplasmic-reticulum-stress	6.12519e-07	reactome-cellular-senescence	0.00242505	reactome-regulation-of-tp53-activity-through-phosphorylation	0.0829958	reactome-akt-phosphorylates-targets-in-the-cytosol	0.44297		0.807692
	0.995951	2	0	0	0	0	246	0	1	0	0	0	reactome-gaba-b-receptor-activation	5.6352e-28	reactome-glucagon-signaling-in-metabolic-regulation	5.53206e-27	reactome-adrenaline-noradrenaline-inhibits-insulin-secretion	2.40943e-25	reactome-g-alpha-z-signalling-events	4.42957e-24	reactome-g-protein-activation	4.68223e-21		0.995951
	0.88764	9	1	79	0	0	0	0	2	1	6	0	reactome-ecm-proteoglycans	5.97954e-292	reactome-extracellular-matrix-organization	2.19255e-272	reactome-elastic-fibre-formation	3.49107e-179	reactome-laminin-interactions	2.53917e-65	reactome-met-activates-ptk2-signaling	3.49011e-58		0.88764
GO FC-DEF
	sc	cluster\cell_type	beta	ductal	gamma	acinar	unclear	mesenchymal	delta	alpha	epsilon	endothelial	top_1	top_pv_1	top_2	top_pv_2	top_3	top_pv_3	top_4	top_pv_4	top_5	top_pv_5
	0.93578	5	1	9	2	204	0	0	0	2	0	0	go-regulation-of-microvillus-assembly	6.68821e-124	go-proteolysis	6.23391e-95	go-oxidoreductase-activity-acting-on-ch-oh-group-of-donors	4.03368e-92	go-water-soluble-vitamin-metabolic-process	4.75728e-91	go-cofactor-metabolic-process	5.56256e-91		0.93578
	0.858696	6	2	2	0	3	0	79	0	5	0	1	go-extracellular-matrix-structural-constituent	0	go-extracellular-matrix-structural-constituent-conferring-tensile-strength	0	go-embryonic-skeletal-system-development	4.22612e-289	go-collagen-containing-extracellular-matrix	4.81627e-278	go-cartilage-development	1.88996e-234		0.858696
	0.888889	4	7	216	0	10	4	1	0	5	0	0	go-tube-morphogenesis	4.43099e-136	go-cell-junction-assembly	1.02906e-121	go-cell-junction-organization	2.14248e-119	go-epithelium-development	9.60825e-118	go-response-to-biotic-stimulus	3.45023e-115		0.888889
	0.918182	3	4	0	16	0	0	0	6	303	1	0	go-monovalent-inorganic-cation-transport	2.76901e-62	go-respiratory-chain-complex	5.4957e-61	go-respirasome	8.3889e-61	go-calcium-transporting-atpase-activity	1.90941e-56	go-cellular-response-to-calcium-ion	2.2087e-55		0.918182
	0.781316	0	368	3	8	0	0	0	79	13	0	0	go-tubulin-binding	1.39024e-67	go-regulation-of-microtubule-polymerization-or-depolymerization	2.13512e-64	go-axon-cytoplasm	1.30821e-60	go-microtubule-binding	1.40851e-60	go-microtubule-polymerization-or-depolymerization	2.22607e-59		0.781316
	0.933333	9	1	14	0	0	0	0	0	0	0	0	go-granulocyte-migration	2.46832e-298	go-b-cell-proliferation	3.82076e-275	go-positive-regulation-of-interleukin-4-production	5.47599e-274	go-regulation-of-neuroinflammatory-response	1.13542e-269	go-positive-regulation-of-cell-activation	2.32301e-265		0.933333
	0.5	8	9	0	0	0	0	0	1	8	0	0	go-rna-modification	8.08215e-09	go-transferase-complex	8.11806e-09	go-dna-binding-transcription-factor-activity	1.57703e-08	go-trna-modification	1.91404e-08	go-trna-processing	2.37966e-08		0.5
	1	7	0	0	0	0	0	0	0	0	0	20	go-glomerular-mesangial-cell-differentiation	3.11131e-301	go-pericyte-cell-differentiation	4.73734e-132	go-vascular-endothelial-growth-factor-activated-receptor-activity	1.96217e-111	go-regulation-of-vasculature-development	4.96443e-98	go-vascular-endothelial-growth-factor-binding	3.39792e-97		1
	0.409326	1	50	1	73	2	0	0	100	158	2	0	go-regulation-of-tau-protein-kinase-activity	1.35503e-161	go-cotranslational-protein-targeting-to-membrane	2.50698e-158	go-positive-regulation-of-tau-protein-kinase-activity	1.77854e-156	go-regulation-of-camp-mediated-signaling	1.33164e-155	go-establishment-of-protein-localization-to-endoplasmic-reticulum	4.08109e-155		0.409326
	0.954955	2	6	0	2	0	0	0	7	318	0	0	go-intrinsic-component-of-organelle-membrane	1.31321e-80	go-organophosphate-biosynthetic-process	1.81778e-50	go-mitochondrial-part	2.09518e-49	go-organelle-inner-membrane	8.23161e-49	go-mitochondrial-envelope	1.70396e-47		0.954955
GO GC-FEM
	sc	cluster\cell_type	acinar	mesenchymal	unclear	delta	alpha	gamma	beta	endothelial	ductal	epsilon	top_1	top_pv_1	top_2	top_pv_2	top_3	top_pv_3	top_4	top_pv_4	top_5	top_pv_5
	0.993289	7	0	0	0	1	0	0	148	0	0	0	go-negative-regulation-of-type-b-pancreatic-cell-apoptotic-process	4.74483e-22	go-regulation-of-membrane-tubulation	8.87375e-18	go-protein-serine-threonine-kinase-inhibitor-activity	8.27658e-17	go-camp-dependent-protein-kinase-inhibitor-activity	1.39009e-16	go-microtubule-plus-end	4.2263e-14		0.993289
	1	6	0	0	0	185	0	0	0	0	0	0	go-receptor-localization-to-synapse	1.11323e-34	go-synapse-organization	8.3805e-33	go-protein-localization-to-synapse	1.61548e-28	go-regulation-of-receptor-localization-to-synapse	5.54039e-22	go-nuclear-envelope-lumen	7.47026e-22		1
	0.925234	8	0	0	0	0	0	99	6	0	0	2	go-regulation-of-cell-communication-by-electrical-coupling	1.65659e-28	go-negative-regulation-of-cell-development	1.21975e-27	go-regulation-of-tau-protein-kinase-activity	1.35414e-27	go-actin-filament-based-movement	4.56647e-27	go-positive-regulation-of-transporter-activity	5.95042e-27		0.925234
	0.925764	4	1	1	4	0	6	0	5	0	212	0	go-epithelium-development	6.52267e-110	go-apical-junction-complex	1.1038e-105	go-tight-junction	3.50091e-105	go-positive-regulation-of-locomotion	9.19265e-97	go-regulation-of-cell-adhesion	9.4268e-95		0.925764
	0.995455	5	0	0	0	0	219	0	0	0	0	1	go-inorganic-ion-transmembrane-transport	8.77587e-70	go-cation-transmembrane-transport	7.70782e-69	go-cation-transport	1.10586e-68	go-metal-ion-transport	8.80577e-67	go-cellular-ion-homeostasis	1.06384e-65		0.995455
	0.9375	12	0	0	0	0	0	0	1	0	15	0	go-lymphocyte-activation	2.17385e-23	go-regulation-of-leukocyte-differentiation	3.39213e-14	go-negative-regulation-of-immune-system-process	9.77411e-14	go-positive-regulation-of-leukocyte-cell-cell-adhesion	6.03923e-13	go-leukocyte-cell-cell-adhesion	1.23641e-12		0.9375
	0.996904	0	0	0	0	0	322	0	1	0	0	0	go-attachment-of-gpi-anchor-to-protein	3.02023e-27	go-stat-family-protein-binding	4.00172e-26	go-negative-regulation-of-inclusion-body-assembly	3.6289e-18	go-membrane-lipid-biosynthetic-process	9.3355e-16	go-organophosphate-catabolic-process	5.53784e-15		0.996904
	0.926357	1	0	0	0	3	16	0	239	0	0	0	go-regulation-of-membrane-tubulation	8.48444e-21	go-protein-serine-threonine-kinase-inhibitor-activity	2.90137e-19	go-axonal-growth-cone	1.6203e-17	go-regulation-of-axonogenesis	7.65421e-16	go-dynactin-binding	3.15064e-15		0.926357
	0.939394	3	217	0	0	0	1	2	3	0	8	0	go-water-soluble-vitamin-metabolic-process	2.00957e-94	go-vitamin-metabolic-process	5.76035e-86	go-polyketide-metabolic-process	7.18001e-70	go-glutathione-metabolic-process	1.72473e-64	go-peptidase-activity	5.55631e-57		0.939394
	1	11	0	0	0	0	0	0	0	20	0	0	go-blood-vessel-morphogenesis	1.93361e-29	go-regulation-of-endothelial-cell-migration	4.18102e-23	go-tube-morphogenesis	1.93269e-18	go-cardiovascular-system-development	4.69656e-18	go-anatomical-structure-formation-involved-in-morphogenesis	2.58968e-17		1
	0.807692	10	0	0	0	4	2	0	42	0	4	0	go-perk-mediated-unfolded-protein-response	1.68121e-17	go-positive-regulation-of-transcription-from-rna-polymerase-ii-promoter-in-response-to-endoplasmic-reticulum-stress	7.32689e-07	go-negative-regulation-of-endoplasmic-reticulum-unfolded-protein-response	8.25483e-05	go-negative-regulation-of-establishment-of-protein-localization-to-mitochondrion	0.000131026	go-regulation-of-ire1-mediated-unfolded-protein-response	0.000219269		0.807692
	0.995951	2	0	0	0	0	246	0	1	0	0	0	go-pancreatic-a-cell-differentiation	3.94662e-38	go-monovalent-inorganic-cation-transport	9.5709e-32	go-regulation-of-long-term-neuronal-synaptic-plasticity	4.18832e-31	go-low-density-lipoprotein-particle-clearance	1.07853e-30	go-metencephalon-development	7.82633e-30		0.995951
	0.88764	9	1	79	0	0	0	0	2	1	6	0	go-extracellular-structure-organization	7.324e-189	go-collagen-fibril-organization	4.43372e-168	go-skeletal-system-development	2.30613e-142	go-connective-tissue-development	2.65344e-134	go-cardiovascular-system-development	1.89252e-81		0.88764
