# Supplementary material for: FEM: mining biological meaning from cell level in single-cell RNA sequencing data
Source: PeerJ. 2021 Nov 30;9:e12570. doi: 10.7717/peerj.12570 (PMC8641482; doi:10.7717/peerj.12570)
Supplement: Supplemental Information 3 — Table S2-1 Differential expression of all genes between gene-based clusters. Table S2-2 Differential expression of all GO between GO-based clusters. Table S2-3 Differential expression of all GO between gene-based clusters. Table S2-4 Differential expression of all pathways between pathway-based clusters. Table S2-5 Differential expression of all pathways between gene-based clusters. [file peerj-09-12570-s003.xlsx]

## Sheet: table s2-1 GC-DEG
	p_val	avg_log2FC	pct.1	pct.2	p_val_adj	cluster	gene
RPL32	1.1788e-154	0.651732	0.999	0.995	1.61661e-150	0	RPL32
RPS6	6.04287e-149	0.687954	0.999	0.994	8.28719e-145	0	RPS6
RPS27	1.22821e-147	0.739381	0.999	0.992	1.68436e-143	0	RPS27
RPS12	3.79726e-147	0.733295	1	0.99	5.20757e-143	0	RPS12
RPL31	8.02155e-134	0.803733	1	0.961	1.10008e-129	0	RPL31
RPS25	9.93701e-133	0.773602	0.999	0.973	1.36276e-128	0	RPS25
RPS14	9.77393e-130	0.622747	0.999	0.995	1.3404e-125	0	RPS14
RPL9	3.94127e-118	0.752597	0.997	0.968	5.40505e-114	0	RPL9
RPL13	4.92219e-117	0.561305	1	0.997	6.75029e-113	0	RPL13
RPS3A	1.48711e-116	0.803064	0.997	0.974	2.03943e-112	0	RPS3A
LDHB	7.02797e-116	1.06041	0.915	0.587	9.63816e-112	0	LDHB
RPS15A	1.31867e-114	0.654647	0.997	0.982	1.80842e-110	0	RPS15A
RPL3	3.76765e-112	0.603227	0.996	0.995	5.16696e-108	0	RPL3
RPS3	9.60046e-112	0.585575	1	0.992	1.31661e-107	0	RPS3
RPL30	1.6242e-110	0.673393	0.997	0.979	2.22742e-106	0	RPL30
RPLP2	2.13632e-110	0.61216	1	0.989	2.92975e-106	0	RPLP2
RPL21	1.19087e-107	0.663269	0.991	0.991	1.63316e-103	0	RPL21
RPS13	1.61003e-106	0.731949	0.99	0.955	2.20799e-102	0	RPS13
CCR7	1.87913e-105	1.4951	0.469	0.1	2.57704e-101	0	CCR7
RPS27A	1.91482e-104	0.744288	0.997	0.963	2.62598e-100	0	RPS27A
RPL35A	3.66669e-95	0.591013	1	0.977	5.0285e-91	0	RPL35A
RPL27A	7.9491e-93	0.545123	1	0.987	1.09014e-88	0	RPL27A
RPS23	9.13953e-93	0.579707	0.999	0.976	1.2534e-88	0	RPS23
EEF1A1	1.10126e-92	0.517781	0.991	0.989	1.51027e-88	0	EEF1A1
RPL11	1.16268e-92	0.465815	1	0.995	1.5945e-88	0	RPL11
MALAT1	2.36739e-91	0.660203	1	1	3.24664e-87	0	MALAT1
RPL13A	2.79391e-90	0.470639	1	0.999	3.83157e-86	0	RPL13A
RPS18	2.83747e-90	0.492214	1	0.995	3.8913e-86	0	RPS18
RPS28	2.98492e-90	0.627777	0.991	0.966	4.09352e-86	0	RPS28
TPT1	7.6496e-89	0.578568	0.999	0.979	1.04907e-84	0	TPT1
RPS20	8.55789e-87	0.68562	0.99	0.94	1.17363e-82	0	RPS20
RPS29	5.20583e-86	0.728824	0.988	0.901	7.13927e-82	0	RPS29
RPS16	4.04575e-85	0.558814	0.996	0.981	5.54834e-81	0	RPS16
RPS4X	3.14521e-80	0.533426	0.996	0.991	4.31334e-76	0	RPS4X
RPL23A	1.18952e-77	0.515517	1	0.986	1.63131e-73	0	RPL23A
RPL5	4.17048e-77	0.600944	0.985	0.963	5.71939e-73	0	RPL5
RPL19	1.70671e-75	0.404856	0.999	0.993	2.34058e-71	0	RPL19
CD3D	2.59015e-74	0.957594	0.848	0.409	3.55213e-70	0	CD3D
RPL10A	1.79635e-70	0.540503	0.99	0.982	2.46351e-66	0	RPL10A
RPL10	4.84637e-69	0.350111	1	0.998	6.64632e-65	0	RPL10
RPSA	1.43424e-67	0.573838	0.985	0.942	1.96692e-63	0	RPSA
RPS5	1.61888e-64	0.509671	0.99	0.971	2.22014e-60	0	RPS5
RPL14	5.23188e-64	0.434989	0.999	0.982	7.17499e-60	0	RPL14
RPS10	2.1508e-63	0.523291	0.987	0.963	2.94961e-59	0	RPS10
RPS15	1.11927e-62	0.418094	1	0.989	1.53497e-58	0	RPS15
RPL36	2.54178e-62	0.5519	0.993	0.945	3.48579e-58	0	RPL36
NPM1	7.43902e-61	0.747996	0.918	0.788	1.02019e-56	0	NPM1
NOSIP	1.49101e-60	1.05017	0.662	0.347	2.04477e-56	0	NOSIP
RPL18	5.67066e-60	0.471546	0.997	0.978	7.77674e-56	0	RPL18
RPL36A	2.20039e-58	0.609898	0.975	0.88	3.01762e-54	0	RPL36A
LEF1	4.43503e-56	1.09924	0.348	0.099	6.08221e-52	0	LEF1
CD3E	1.35931e-55	0.847889	0.735	0.395	1.86415e-51	0	CD3E
RPL7	6.04265e-55	0.580949	0.981	0.964	8.28689e-51	0	RPL7
RPLP0	5.20948e-53	0.500283	0.988	0.934	7.14428e-49	0	RPLP0
PRKCQ-AS1	9.91556e-52	1.04265	0.348	0.105	1.35982e-47	0	PRKCQ-AS1
PIK3IP1	3.8421e-51	0.990904	0.456	0.177	5.26905e-47	0	PIK3IP1
RPS19	1.79332e-49	0.376759	0.999	0.992	2.45936e-45	0	RPS19
JUNB	3.6289e-49	0.747774	0.923	0.894	4.97668e-45	0	JUNB
RPL4	6.94994e-49	0.499674	0.987	0.952	9.53115e-45	0	RPL4
RPS8	1.41995e-48	0.436574	0.996	0.984	1.94732e-44	0	RPS8
EEF1B2	1.38733e-47	0.551162	0.943	0.863	1.90258e-43	0	EEF1B2
RPL17	2.37304e-47	0.460243	0.978	0.951	3.25439e-43	0	RPL17
TMEM66	1.14077e-46	0.738686	0.854	0.689	1.56445e-42	0	TMEM66
BTG1	1.3145e-46	0.610668	0.944	0.853	1.8027e-42	0	BTG1
RPS2	2.49229e-46	0.321892	1	0.996	3.41792e-42	0	RPS2
RPL22	3.73833e-46	0.644057	0.908	0.773	5.12675e-42	0	RPL22
RPL18A	1.15046e-45	0.307744	0.997	0.992	1.57774e-41	0	RPL18A
GLTSCR2	3.92088e-44	0.589715	0.93	0.795	5.3771e-40	0	GLTSCR2
RPS26	7.55958e-44	0.503088	0.965	0.892	1.03672e-39	0	RPS26
RPL38	3.01437e-43	0.536957	0.966	0.865	4.1339e-39	0	RPL38
RPL37	2.77954e-42	0.482352	0.987	0.938	3.81186e-38	0	RPL37
RPL24	3.0395e-42	0.453761	0.988	0.937	4.16838e-38	0	RPL24
TCF7	4.80407e-42	0.859988	0.411	0.17	6.5883e-38	0	TCF7
CD7	1.78912e-41	0.731096	0.589	0.291	2.45359e-37	0	CD7
CD27	2.08406e-40	0.712624	0.427	0.174	2.85808e-36	0	CD27
MAL	1.08593e-38	0.978194	0.273	0.083	1.48924e-34	0	MAL
RPLP1	9.41129e-38	0.300007	1	0.996	1.29066e-33	0	RPLP1
RPL12	2.7292e-37	0.29812	1	0.988	3.74283e-33	0	RPL12
C6orf48	6.83485e-37	0.834231	0.708	0.482	9.37332e-33	0	C6orf48
IL7R	7.87323e-36	0.712838	0.607	0.332	1.07973e-31	0	IL7R
RPL34	1.34685e-34	0.631048	0.936	0.9	1.84707e-30	0	RPL34
RPL35	1.34753e-34	0.368776	0.991	0.962	1.848e-30	0	RPL35
RPS21	1.03325e-32	0.455659	0.937	0.835	1.417e-28	0	RPS21
RPS4Y1	7.50887e-31	0.455639	0.936	0.865	1.02977e-26	0	RPS4Y1
RPL27	1.10417e-30	0.373862	0.982	0.946	1.51426e-26	0	RPL27
RPL37A	2.40233e-30	0.371657	0.985	0.941	3.29455e-26	0	RPL37A
RPSAP58	4.08781e-30	0.530129	0.848	0.689	5.60602e-26	0	RPSAP58
LTB	8.80386e-30	0.437717	0.904	0.632	1.20736e-25	0	LTB
RPL7A	1.08506e-29	0.337079	0.985	0.973	1.48805e-25	0	RPL7A
RPL15	2.19315e-27	0.282181	0.997	0.993	3.00769e-23	0	RPL15
LEPROTL1	2.75218e-27	0.71897	0.406	0.207	3.77434e-23	0	LEPROTL1
RPL6	7.61501e-27	0.288681	0.997	0.992	1.04432e-22	0	RPL6
AES	1.53932e-26	0.592968	0.656	0.432	2.11102e-22	0	AES
TOMM7	4.44668e-25	0.485272	0.858	0.745	6.09817e-21	0	TOMM7
RGCC	4.63849e-25	0.709437	0.37	0.182	6.36123e-21	0	RGCC
C12orf57	3.75391e-23	0.785431	0.44	0.255	5.14811e-19	0	C12orf57
SELL	5.19589e-23	0.43764	0.615	0.418	7.12565e-19	0	SELL
GIMAP5	1.22201e-22	0.798869	0.421	0.235	1.67586e-18	0	GIMAP5
RHOH	1.27856e-21	0.678862	0.383	0.203	1.75341e-17	0	RHOH
TMEM123	2.95831e-21	0.582473	0.553	0.381	4.05702e-17	0	TMEM123
RGS10	1.66265e-20	0.553536	0.548	0.369	2.28015e-16	0	RGS10
GYPC	1.76654e-20	0.621001	0.421	0.246	2.42264e-16	0	GYPC
LCK	1.01374e-19	0.539503	0.506	0.31	1.39024e-15	0	LCK
NDFIP1	1.33491e-19	0.721371	0.446	0.282	1.8307e-15	0	NDFIP1
RPS7	3.54893e-19	0.259813	0.997	0.987	4.86701e-15	0	RPS7
RPL23	2.45157e-18	0.306648	0.908	0.833	3.36209e-14	0	RPL23
FLT3LG	2.76353e-18	0.626301	0.275	0.137	3.78991e-14	0	FLT3LG
EIF4A2	1.71754e-17	0.40464	0.753	0.599	2.35543e-13	0	EIF4A2
HNRNPA1	2.06648e-17	0.295143	0.955	0.912	2.83398e-13	0	HNRNPA1
CD3G	2.78029e-17	0.463621	0.336	0.179	3.81289e-13	0	CD3G
TRAT1	4.05761e-17	0.549031	0.27	0.135	5.56461e-13	0	TRAT1
HINT1	3.45166e-16	0.424834	0.744	0.603	4.7336e-12	0	HINT1
EVL	3.9918e-16	0.498551	0.646	0.491	5.47435e-12	0	EVL
SLC2A3	1.05767e-15	0.494978	0.36	0.212	1.45048e-11	0	SLC2A3
OCIAD2	7.85812e-15	0.46042	0.332	0.189	1.07766e-10	0	OCIAD2
SRSF5	3.13187e-14	0.318936	0.803	0.704	4.29505e-10	0	SRSF5
EEF1D	3.50705e-14	0.284946	0.963	0.96	4.80957e-10	0	EEF1D
PRDX2	4.41889e-14	0.496886	0.392	0.252	6.06006e-10	0	PRDX2
ZFP36L2	8.23968e-14	0.432936	0.746	0.617	1.12999e-09	0	ZFP36L2
DNAJB1	9.32973e-14	0.577597	0.392	0.257	1.27948e-09	0	DNAJB1
SOCS3	4.21414e-13	0.650302	0.259	0.145	5.77927e-09	0	SOCS3
SOD1	6.10852e-13	0.446572	0.61	0.475	8.37723e-09	0	SOD1
COMMD6	6.44393e-13	0.391317	0.683	0.569	8.83721e-09	0	COMMD6
LAT	6.83014e-13	0.454303	0.316	0.186	9.36685e-09	0	LAT
TRAF3IP3	9.17159e-13	0.589275	0.566	0.451	1.25779e-08	0	TRAF3IP3
PABPC1	1.88778e-12	0.325641	0.886	0.844	2.5889e-08	0	PABPC1
CYTIP	4.06261e-12	0.374008	0.437	0.306	5.57147e-08	0	CYTIP
FYB	4.59777e-12	0.419388	0.461	0.335	6.30538e-08	0	FYB
GIMAP7	5.64931e-12	0.312067	0.632	0.502	7.74746e-08	0	GIMAP7
HSPA8	6.87728e-12	0.358463	0.769	0.635	9.4315e-08	0	HSPA8
ST13	9.76684e-12	0.431681	0.491	0.369	1.33942e-07	0	ST13
CD2	1.23369e-11	0.336227	0.431	0.278	1.69189e-07	0	CD2
PPA1	1.68982e-11	0.400791	0.406	0.282	2.31743e-07	0	PPA1
NACA	6.45525e-11	0.26659	0.982	0.964	8.85274e-07	0	NACA
PEBP1	6.52511e-11	0.329215	0.474	0.345	8.94853e-07	0	PEBP1
BTG2	1.17988e-10	0.462371	0.447	0.327	1.61809e-06	0	BTG2
DDX5	1.47429e-10	0.288497	0.88	0.786	2.02184e-06	0	DDX5
COX7C	1.85379e-10	0.343717	0.757	0.67	2.54229e-06	0	COX7C
JUN	3.52389e-10	0.294989	0.782	0.723	4.83266e-06	0	JUN
CD69	5.79008e-10	0.335921	0.461	0.324	7.94052e-06	0	CD69
ACAP1	6.14201e-10	0.554157	0.395	0.271	8.42315e-06	0	ACAP1
PSIP1	1.41451e-09	0.464013	0.26	0.164	1.93986e-05	0	PSIP1
CXCR4	1.53008e-09	0.259425	0.693	0.566	2.09835e-05	0	CXCR4
RSL1D1	7.8716e-09	0.419003	0.411	0.298	0.000107951	0	RSL1D1
SPOCK2	8.69322e-09	0.423294	0.288	0.184	0.000119219	0	SPOCK2
SNRPD2	1.12056e-08	0.363209	0.639	0.542	0.000153673	0	SNRPD2
BTF3	6.70323e-08	0.283721	0.925	0.883	0.000919281	0	BTF3
EIF3E	8.17254e-08	0.414341	0.44	0.351	0.00112078	0	EIF3E
CCDC109B	1.08748e-07	0.500072	0.393	0.299	0.00149137	0	CCDC109B
SNHG8	4.4332e-07	0.523776	0.317	0.229	0.00607969	0	SNHG8
EEF1G	8.83386e-07	0.352533	0.307	0.222	0.0121148	0	EEF1G
UXT	9.64128e-07	0.343607	0.472	0.383	0.013222	0	UXT
RPL41	3.85353e-06	0.268259	0.596	0.519	0.0528474	0	RPL41
SBDS	4.31074e-06	0.25312	0.265	0.185	0.0591175	0	SBDS
RPL39	7.83182e-06	0.401772	0.33	0.253	0.107406	0	RPL39
MZT2B	1.27824e-05	0.332997	0.436	0.356	0.175298	0	MZT2B
EIF2S3	1.50747e-05	0.26747	0.265	0.192	0.206734	0	EIF2S3
GIMAP4	4.23556e-05	0.273621	0.509	0.438	0.580865	0	GIMAP4
CUTA	5.95234e-05	0.293012	0.484	0.413	0.816304	0	CUTA
MZT2A	0.000132959	0.282201	0.31	0.245	1	0	MZT2A
CITED2	0.000190917	0.309144	0.273	0.211	1	0	CITED2
ZFAS1	0.000205238	0.276587	0.525	0.476	1	0	ZFAS1
MRPS21	0.000274538	0.430788	0.272	0.21	1	0	MRPS21
TOMM20	0.000721113	0.256705	0.307	0.253	1	0	TOMM20
SON	0.000781217	0.308676	0.351	0.299	1	0	SON
SF1	0.00111372	0.256762	0.349	0.29	1	0	SF1
PCNP	0.00119714	0.355397	0.295	0.243	1	0	PCNP
CCND3	0.00184729	0.270115	0.465	0.391	1	0	CCND3
GIMAP1	0.00286284	0.251362	0.36	0.314	1	0	GIMAP1
COX6C	0.00574735	0.261133	0.477	0.439	1	0	COX6C
S100A9	0	5.50266	0.994	0.214	0	1	S100A9
S100A8	0	5.50188	0.974	0.12	0	1	S100A8
LGALS2	0	3.70603	0.898	0.059	0	1	LGALS2
FCN1	0	3.38826	0.949	0.148	0	1	FCN1
CD14	5.61277e-296	2.81888	0.661	0.029	7.69735e-292	1	CD14
TYROBP	2.13909e-292	3.06868	0.994	0.264	2.93355e-288	1	TYROBP
MS4A6A	3.3837e-278	2.8888	0.679	0.042	4.6404e-274	1	MS4A6A
CST3	4.72427e-275	2.99693	0.992	0.266	6.47886e-271	1	CST3
LYZ	1.16795e-271	4.49402	0.998	0.516	1.60173e-267	1	LYZ
TYMP	3.88409e-240	2.57565	0.911	0.223	5.32664e-236	1	TYMP
LST1	1.0332e-237	2.04856	0.959	0.221	1.41693e-233	1	LST1
AIF1	1.35847e-236	2.32629	0.959	0.243	1.863e-232	1	AIF1
LGALS1	2.68503e-235	2.59642	0.98	0.363	3.68224e-231	1	LGALS1
CFD	1.46539e-233	2.32405	0.776	0.106	2.00963e-229	1	CFD
FTL	2.59174e-221	2.64124	1	0.985	3.55431e-217	1	FTL
GPX1	2.73354e-217	2.25007	0.917	0.31	3.74877e-213	1	GPX1
GSTP1	4.70616e-217	2.47385	0.935	0.352	6.45403e-213	1	GSTP1
GRN	1.02637e-216	2.40912	0.748	0.127	1.40756e-212	1	GRN
S100A6	1.42995e-210	2.02292	0.994	0.734	1.96104e-206	1	S100A6
FTH1	4.92614e-206	2.24201	1	0.986	6.75571e-202	1	FTH1
FCER1G	9.51327e-200	1.85121	0.937	0.228	1.30465e-195	1	FCER1G
CTSS	4.07631e-188	2.13026	0.939	0.423	5.59025e-184	1	CTSS
S100A4	2.22084e-183	1.66165	1	0.771	3.04566e-179	1	S100A4
CD68	3.20636e-181	2.02581	0.697	0.112	4.3972e-177	1	CD68
CEBPD	4.73945e-177	2.15121	0.681	0.121	6.49968e-173	1	CEBPD
LGALS3	7.72828e-177	2.25706	0.711	0.141	1.05986e-172	1	LGALS3
OAZ1	2.77874e-174	1.43105	0.994	0.888	3.81076e-170	1	OAZ1
NPC2	2.90154e-172	2.09764	0.87	0.314	3.97918e-168	1	NPC2
S100A11	2.92216e-171	1.86993	0.949	0.432	4.00745e-167	1	S100A11
AP1S2	3.76876e-171	2.16639	0.756	0.194	5.16848e-167	1	AP1S2
CDA	6.3297e-170	2.05734	0.539	0.058	8.68055e-166	1	CDA
SAT1	4.45777e-167	1.91476	0.963	0.504	6.11338e-163	1	SAT1
PSAP	3.63416e-166	1.8827	0.913	0.414	4.98389e-162	1	PSAP
CFP	2.43473e-163	1.99782	0.642	0.111	3.33899e-159	1	CFP
CSF3R	2.72374e-158	1.8922	0.457	0.039	3.73534e-154	1	CSF3R
SERPINA1	1.32569e-157	1.82264	0.705	0.141	1.81804e-153	1	SERPINA1
COTL1	3.23615e-157	1.66728	0.965	0.55	4.43805e-153	1	COTL1
NCF2	3.99387e-156	2.01492	0.571	0.085	5.4772e-152	1	NCF2
NUP214	1.09988e-153	1.84559	0.514	0.062	1.50838e-149	1	NUP214
BLVRB	5.73547e-153	1.89505	0.541	0.076	7.86562e-149	1	BLVRB
ASGR1	1.77158e-149	1.71691	0.362	0.015	2.42954e-145	1	ASGR1
CYBA	1.05761e-146	1.31133	0.988	0.811	1.45041e-142	1	CYBA
GABARAP	1.6341e-146	1.77696	0.866	0.403	2.24101e-142	1	GABARAP
FCGRT	4.72353e-145	2.01215	0.642	0.139	6.47786e-141	1	FCGRT
ALDH2	3.55865e-144	1.76319	0.431	0.038	4.88033e-140	1	ALDH2
IFI30	1.05821e-143	1.64804	0.547	0.078	1.45122e-139	1	IFI30
FOLR3	1.04448e-138	1.69038	0.297	0.005	1.4324e-134	1	FOLR3
PYCARD	6.93288e-138	1.64538	0.801	0.274	9.50775e-134	1	PYCARD
TKT	5.67449e-136	1.76758	0.772	0.256	7.782e-132	1	TKT
SPI1	9.08208e-135	1.71088	0.622	0.12	1.24552e-130	1	SPI1
FPR1	1.1345e-134	1.74366	0.413	0.039	1.55586e-130	1	FPR1
BRI3	3.11158e-133	1.75959	0.591	0.116	4.26722e-129	1	BRI3
TSPO	1.18138e-132	1.79767	0.846	0.391	1.62015e-128	1	TSPO
RAC1	3.93757e-131	1.70244	0.843	0.345	5.39998e-127	1	RAC1
RBP7	2.96838e-129	1.68382	0.315	0.013	4.07083e-125	1	RBP7
SLC7A7	5.34492e-125	1.63399	0.461	0.062	7.33002e-121	1	SLC7A7
IGSF6	3.21923e-124	1.63995	0.402	0.042	4.41485e-120	1	IGSF6
TNFSF13B	6.08014e-123	1.9181	0.502	0.084	8.3383e-119	1	TNFSF13B
S100A12	3.77354e-121	1.8526	0.272	0.007	5.17503e-117	1	S100A12
RNF130	4.11182e-116	1.66302	0.52	0.101	5.63896e-112	1	RNF130
IFITM3	1.63021e-114	1.67518	0.606	0.136	2.23567e-110	1	IFITM3
BST1	3.58705e-113	1.34261	0.313	0.02	4.91928e-109	1	BST1
VCAN	2.12483e-112	1.45595	0.364	0.036	2.91399e-108	1	VCAN
MNDA	1.84803e-111	1.56928	0.423	0.06	2.53439e-107	1	MNDA
PLBD1	3.12343e-110	1.6449	0.339	0.031	4.28348e-106	1	PLBD1
TALDO1	3.57902e-109	1.49688	0.736	0.283	4.90827e-105	1	TALDO1
APOBEC3A	4.23676e-109	1.84151	0.417	0.058	5.81029e-105	1	APOBEC3A
GAPDH	1.59443e-108	1.23631	0.957	0.817	2.1866e-104	1	GAPDH
IFI6	6.13606e-101	1.54061	0.768	0.319	8.41499e-97	1	IFI6
NEAT1	8.39087e-101	1.31141	0.915	0.576	1.15072e-96	1	NEAT1
CTSB	6.96137e-99	1.6397	0.522	0.126	9.54683e-95	1	CTSB
CTSH	9.98411e-99	1.45091	0.494	0.106	1.36922e-94	1	CTSH
CPVL	1.25497e-96	1.53911	0.378	0.056	1.72106e-92	1	CPVL
ODF3B	1.456e-92	1.42903	0.382	0.061	1.99675e-88	1	ODF3B
AP2S1	1.39276e-91	1.47596	0.689	0.276	1.91004e-87	1	AP2S1
SMCO4	7.44187e-90	1.39091	0.352	0.049	1.02058e-85	1	SMCO4
TGFBI	5.98638e-89	1.25462	0.352	0.051	8.20972e-85	1	TGFBI
SH3BGRL3	6.16582e-89	0.874202	0.974	0.831	8.45581e-85	1	SH3BGRL3
LILRA5	2.49378e-88	1.30196	0.378	0.061	3.41997e-84	1	LILRA5
RAB32	6.00253e-86	1.3195	0.305	0.036	8.23186e-82	1	RAB32
HLA-DRA	1.46376e-85	0.789849	0.937	0.471	2.0074e-81	1	HLA-DRA
TMEM176B	1.60098e-83	1.19082	0.256	0.021	2.19558e-79	1	TMEM176B
CD33	3.48645e-82	1.19157	0.272	0.028	4.78132e-78	1	CD33
C1orf162	1.55651e-81	1.28461	0.73	0.306	2.1346e-77	1	C1orf162
ARPC1B	3.20644e-80	1.10259	0.921	0.702	4.39731e-76	1	ARPC1B
IL8	6.1666e-80	1.94924	0.276	0.031	8.45688e-76	1	IL8
TMSB10	6.64089e-78	0.563889	1	0.991	9.10732e-74	1	TMSB10
ANXA2	4.10119e-77	1.29392	0.75	0.364	5.62437e-73	1	ANXA2
RGS2	4.32602e-77	1.4335	0.593	0.205	5.9327e-73	1	RGS2
STX11	5.24703e-77	1.40516	0.386	0.076	7.19578e-73	1	STX11
SRGN	7.47367e-77	1.06256	0.872	0.536	1.02494e-72	1	SRGN
CEBPB	1.33471e-75	1.26052	0.659	0.248	1.83042e-71	1	CEBPB
CAPG	7.36422e-75	1.31049	0.526	0.163	1.00993e-70	1	CAPG
KLF4	4.55205e-74	1.30767	0.354	0.066	6.24268e-70	1	KLF4
LY86	1.78044e-72	1.2945	0.474	0.126	2.4417e-68	1	LY86
ATP6V0B	1.84352e-72	1.54423	0.644	0.269	2.5282e-68	1	ATP6V0B
AGTRAP	3.71099e-72	1.26537	0.407	0.094	5.08925e-68	1	AGTRAP
PLAUR	7.07612e-72	1.26487	0.352	0.068	9.70419e-68	1	PLAUR
ARPC3	1.91956e-71	0.879282	0.937	0.783	2.63248e-67	1	ARPC3
IL1B	5.49936e-71	1.59673	0.27	0.035	7.54182e-67	1	IL1B
VIM	6.4252e-71	1.06809	0.911	0.77	8.81152e-67	1	VIM
MSRB1	1.42164e-69	1.15647	0.327	0.059	1.94963e-65	1	MSRB1
C19orf38	9.75211e-69	1.2061	0.315	0.055	1.3374e-64	1	C19orf38
CCL3	3.71665e-68	1.97805	0.378	0.086	5.09701e-64	1	CCL3
ATP5G2	6.43352e-68	0.870605	0.925	0.793	8.82293e-64	1	ATP5G2
CTSZ	1.79361e-67	1.14321	0.331	0.063	2.45975e-63	1	CTSZ
HLA-DRB1	1.95237e-67	0.89803	0.829	0.375	2.67749e-63	1	HLA-DRB1
BLVRA	4.02203e-65	1.55097	0.443	0.126	5.51582e-61	1	BLVRA
FGR	9.97968e-65	1.12119	0.492	0.151	1.36861e-60	1	FGR
S100A10	2.2933e-64	1.15483	0.837	0.596	3.14503e-60	1	S100A10
SERF2	3.05231e-62	0.819212	0.957	0.832	4.18594e-58	1	SERF2
LINC00936	1.65486e-61	1.59633	0.555	0.216	2.26947e-57	1	LINC00936
FGL2	1.84552e-61	1.47466	0.346	0.077	2.53094e-57	1	FGL2
MPEG1	3.28784e-60	1.15444	0.311	0.063	4.50894e-56	1	MPEG1
HCK	7.98322e-60	1.03407	0.386	0.096	1.09482e-55	1	HCK
SLC11A1	3.20505e-59	1.0596	0.274	0.048	4.3954e-55	1	SLC11A1
PRELID1	3.92698e-59	1.19603	0.734	0.406	5.38546e-55	1	PRELID1
EIF4EBP1	4.33962e-59	1.07487	0.335	0.076	5.95135e-55	1	EIF4EBP1
PGD	5.59998e-59	1.12273	0.325	0.072	7.67981e-55	1	PGD
CTSD	1.25346e-58	1.26129	0.506	0.182	1.719e-54	1	CTSD
TIMP1	1.79561e-58	1.01851	0.624	0.259	2.4625e-54	1	TIMP1
NFKBIA	1.84296e-58	1.30074	0.711	0.397	2.52744e-54	1	NFKBIA
MAFB	1.97168e-58	1.34242	0.285	0.054	2.70397e-54	1	MAFB
SCO2	5.0754e-58	1.12347	0.352	0.084	6.96041e-54	1	SCO2
MT-ND1	1.14763e-57	0.70499	0.978	0.941	1.57386e-53	1	MT-ND1
FCGR2A	1.54009e-57	1.28511	0.26	0.044	2.11208e-53	1	FCGR2A
APLP2	3.92649e-57	1.15729	0.402	0.112	5.38478e-53	1	APLP2
PILRA	4.25991e-57	0.943372	0.323	0.069	5.84204e-53	1	PILRA
TMSB4X	6.01836e-56	0.424104	1	1	8.25358e-52	1	TMSB4X
ACTB	2.75743e-55	0.521449	0.996	0.99	3.78154e-51	1	ACTB
CNPY3	1.6504e-54	1.27912	0.545	0.218	2.26336e-50	1	CNPY3
PFDN5	8.84187e-54	0.689654	0.982	0.909	1.21257e-49	1	PFDN5
HLA-DRB5	9.46579e-54	0.884187	0.663	0.278	1.29814e-49	1	HLA-DRB5
FKBP1A	8.60799e-53	1.02129	0.715	0.405	1.1805e-48	1	FKBP1A
RNASE6	1.23892e-52	1.00316	0.291	0.059	1.69906e-48	1	RNASE6
C20orf24	9.87938e-52	1.15319	0.565	0.25	1.35486e-47	1	C20orf24
EIF4A1	1.31843e-51	0.932849	0.831	0.644	1.80809e-47	1	EIF4A1
C5AR1	1.33414e-51	1.24123	0.276	0.058	1.82964e-47	1	C5AR1
STXBP2	5.85329e-51	1.13841	0.494	0.186	8.0272e-47	1	STXBP2
HLA-DMA	7.29757e-51	0.974701	0.541	0.2	1.00079e-46	1	HLA-DMA
FOSB	1.57854e-49	1.08688	0.717	0.433	2.16481e-45	1	FOSB
LAMTOR4	2.48576e-49	0.949604	0.768	0.465	3.40898e-45	1	LAMTOR4
TBXAS1	2.57298e-49	0.948153	0.305	0.072	3.52859e-45	1	TBXAS1
C4orf48	2.13003e-48	1.11484	0.37	0.114	2.92112e-44	1	C4orf48
GCA	2.2213e-48	0.994225	0.325	0.086	3.04629e-44	1	GCA
ISG15	2.4001e-48	1.17195	0.693	0.392	3.2915e-44	1	ISG15
PGLS	2.42297e-47	1.003	0.551	0.24	3.32286e-43	1	PGLS
IFNGR2	1.11294e-46	1.17553	0.364	0.109	1.52628e-42	1	IFNGR2
ASAH1	3.39138e-45	1.03775	0.486	0.191	4.65094e-41	1	ASAH1
AMICA1	4.36148e-45	1.00149	0.506	0.207	5.98134e-41	1	AMICA1
CYBB	5.57879e-45	0.984521	0.28	0.067	7.65075e-41	1	CYBB
SERPINB1	1.85883e-44	1.19708	0.604	0.308	2.54919e-40	1	SERPINB1
CPPED1	2.21784e-44	0.912775	0.272	0.064	3.04155e-40	1	CPPED1
ALDOA	6.74922e-44	0.834671	0.831	0.671	9.25588e-40	1	ALDOA
NCF1	2.20878e-42	1.1117	0.37	0.12	3.02912e-38	1	NCF1
GLRX	4.05654e-42	1.09133	0.616	0.317	5.56314e-38	1	GLRX
ATP6V1F	1.44299e-41	1.16331	0.608	0.318	1.97891e-37	1	ATP6V1F
H2AFY	3.12722e-41	1.364	0.522	0.245	4.28867e-37	1	H2AFY
LGALS9	6.18427e-41	0.908842	0.378	0.128	8.48111e-37	1	LGALS9
JUND	3.90599e-40	1.32432	0.341	0.111	5.35667e-36	1	JUND
MT-CO1	4.15889e-40	0.451263	0.994	0.995	5.7035e-36	1	MT-CO1
VAMP8	1.02537e-39	0.729307	0.703	0.46	1.40619e-35	1	VAMP8
HLA-DPA1	1.3596e-39	0.757323	0.754	0.433	1.86456e-35	1	HLA-DPA1
MYL6	1.93278e-39	0.655137	0.939	0.83	2.65062e-35	1	MYL6
LRRC25	8.97954e-39	0.79118	0.26	0.065	1.23145e-34	1	LRRC25
FAM26F	1.96972e-38	0.874008	0.453	0.176	2.70127e-34	1	FAM26F
RHOB	2.73772e-38	1.08578	0.299	0.09	3.75451e-34	1	RHOB
C10orf54	3.18324e-38	0.900943	0.591	0.321	4.36549e-34	1	C10orf54
RP11-290F20.3	7.21587e-38	0.783307	0.283	0.076	9.89584e-34	1	RP11-290F20.3
SAT2	1.00805e-37	1.15027	0.362	0.127	1.38244e-33	1	SAT2
TCEB2	1.14784e-37	0.942955	0.705	0.439	1.57415e-33	1	TCEB2
BID	1.83324e-37	0.934953	0.417	0.158	2.51411e-33	1	BID
MIR24-2	4.74181e-37	0.983268	0.268	0.074	6.50292e-33	1	MIR24-2
CARD16	9.01134e-37	0.939083	0.51	0.236	1.23582e-32	1	CARD16
TMEM205	4.94688e-36	0.969116	0.272	0.077	6.78414e-32	1	TMEM205
GLIPR2	5.42927e-35	0.908482	0.429	0.176	7.4457e-31	1	GLIPR2
LAMTOR1	2.07369e-34	0.723909	0.565	0.294	2.84386e-30	1	LAMTOR1
LY6E	2.8489e-34	0.736153	0.819	0.63	3.90698e-30	1	LY6E
CLTA	7.75662e-34	0.895718	0.502	0.241	1.06374e-29	1	CLTA
DYNLT1	1.13967e-33	0.847965	0.382	0.148	1.56294e-29	1	DYNLT1
RHOG	3.49684e-33	0.948548	0.614	0.34	4.79557e-29	1	RHOG
GSTO1	4.5292e-33	0.87592	0.492	0.244	6.21135e-29	1	GSTO1
GNAI2	6.5932e-33	0.938939	0.421	0.186	9.04192e-29	1	GNAI2
ANXA5	6.78597e-33	0.913302	0.518	0.257	9.30628e-29	1	ANXA5
CECR1	2.12575e-32	0.731568	0.256	0.074	2.91526e-28	1	CECR1
TPI1	2.35325e-32	0.765584	0.707	0.459	3.22725e-28	1	TPI1
BNIP3L	3.41346e-32	0.905767	0.339	0.125	4.68122e-28	1	BNIP3L
HLA-DPB1	1.26887e-31	0.535647	0.742	0.463	1.74013e-27	1	HLA-DPB1
ZFP36	1.74577e-31	0.717706	0.837	0.669	2.39415e-27	1	ZFP36
SCPEP1	2.12242e-31	0.996563	0.297	0.098	2.91068e-27	1	SCPEP1
EFHD2	2.81824e-31	0.841672	0.38	0.152	3.86493e-27	1	EFHD2
CD63	1.03044e-30	0.785814	0.555	0.297	1.41314e-26	1	CD63
C20orf27	5.834e-30	1.03987	0.28	0.095	8.00074e-26	1	C20orf27
GPX4	9.68746e-30	0.80735	0.717	0.5	1.32854e-25	1	GPX4
ATOX1	6.27302e-29	0.764792	0.264	0.086	8.60283e-25	1	ATOX1
NOP10	2.68164e-28	0.897089	0.49	0.251	3.6776e-24	1	NOP10
SOD2	4.69299e-28	0.954796	0.374	0.163	6.43596e-24	1	SOD2
THEMIS2	8.31719e-28	0.820106	0.258	0.086	1.14062e-23	1	THEMIS2
TIMM13	1.54782e-27	0.761612	0.384	0.168	2.12267e-23	1	TIMM13
ATP6V0D1	1.66908e-27	0.840287	0.337	0.138	2.28897e-23	1	ATP6V0D1
MS4A7	4.76778e-27	0.553861	0.262	0.084	6.53853e-23	1	MS4A7
SERP1	6.12323e-26	0.589176	0.734	0.51	8.3974e-22	1	SERP1
ARRB2	1.01343e-25	1.09086	0.435	0.215	1.38982e-21	1	ARRB2
WDR83OS	1.86252e-25	0.73964	0.53	0.304	2.55425e-21	1	WDR83OS
COX6B1	2.27356e-25	0.711463	0.734	0.533	3.11796e-21	1	COX6B1
SLC25A5	3.43876e-25	0.830197	0.681	0.465	4.71592e-21	1	SLC25A5
NDUFS7	4.51275e-25	0.840248	0.474	0.249	6.18879e-21	1	NDUFS7
H3F3A	9.58122e-25	0.713806	0.573	0.34	1.31397e-20	1	H3F3A
SUPT4H1	1.29612e-24	0.802246	0.463	0.249	1.7775e-20	1	SUPT4H1
NAGK	1.44289e-24	0.800073	0.256	0.094	1.97878e-20	1	NAGK
CLIC1	1.97071e-24	0.487132	0.799	0.606	2.70263e-20	1	CLIC1
COMT	1.98298e-24	0.764882	0.303	0.123	2.71946e-20	1	COMT
LAMTOR2	2.78028e-24	0.748362	0.388	0.186	3.81287e-20	1	LAMTOR2
NDUFA11	3.17028e-24	0.716873	0.589	0.368	4.34772e-20	1	NDUFA11
SAMHD1	3.97799e-24	0.965613	0.407	0.205	5.45541e-20	1	SAMHD1
GLUL	5.92256e-24	0.748542	0.252	0.092	8.12221e-20	1	GLUL
ARPC2	1.15788e-23	0.485341	0.882	0.778	1.58792e-19	1	ARPC2
MT2A	1.67054e-23	0.747252	0.494	0.275	2.29098e-19	1	MT2A
CSTB	1.34953e-22	0.716549	0.545	0.327	1.85074e-18	1	CSTB
BST2	1.52877e-22	0.732211	0.626	0.406	2.09656e-18	1	BST2
ZYX	4.1201e-22	0.600666	0.289	0.118	5.6503e-18	1	ZYX
OAZ2	5.33724e-22	0.802812	0.309	0.13	7.31949e-18	1	OAZ2
HSBP1	5.44383e-22	0.679812	0.305	0.129	7.46567e-18	1	HSBP1
NINJ1	1.0639e-21	0.701862	0.295	0.123	1.45903e-17	1	NINJ1
BRK1	1.12439e-21	0.538472	0.709	0.511	1.54198e-17	1	BRK1
POLE4	1.6579e-21	0.76065	0.337	0.159	2.27364e-17	1	POLE4
TNFSF10	2.39693e-21	0.795358	0.37	0.179	3.28715e-17	1	TNFSF10
ATP5D	4.16655e-20	0.545781	0.687	0.508	5.714e-16	1	ATP5D
COX8A	5.35224e-20	0.656207	0.549	0.348	7.34006e-16	1	COX8A
WARS	8.21977e-20	0.705343	0.26	0.107	1.12726e-15	1	WARS
ITGB2	1.58381e-19	0.51207	0.642	0.429	2.17203e-15	1	ITGB2
CASP1	1.00453e-18	0.682598	0.429	0.236	1.37762e-14	1	CASP1
SLC25A6	1.35826e-18	0.4558	0.876	0.817	1.86272e-14	1	SLC25A6
RHOA	1.55552e-18	0.544672	0.687	0.533	2.13324e-14	1	RHOA
PFN1	1.76158e-18	0.299949	0.957	0.939	2.41583e-14	1	PFN1
EMP3	1.80786e-18	0.601168	0.823	0.711	2.47929e-14	1	EMP3
HIGD2A	1.87074e-18	0.646451	0.636	0.458	2.56553e-14	1	HIGD2A
POLR2L	2.01861e-18	0.675422	0.514	0.323	2.76832e-14	1	POLR2L
HLA-DMB	3.72507e-18	0.440446	0.321	0.147	5.10856e-14	1	HLA-DMB
SDCBP	4.15128e-18	0.670559	0.394	0.211	5.69306e-14	1	SDCBP
PKM	6.88361e-18	0.588471	0.581	0.385	9.44018e-14	1	PKM
RNH1	9.2508e-18	0.617239	0.457	0.271	1.26865e-13	1	RNH1
TMEM219	1.1633e-17	1.13611	0.421	0.24	1.59535e-13	1	TMEM219
POU2F2	1.69331e-17	0.67241	0.28	0.13	2.3222e-13	1	POU2F2
RILPL2	1.90096e-17	0.838935	0.319	0.159	2.60698e-13	1	RILPL2
SERPINB6	4.46562e-17	0.630903	0.323	0.163	6.12415e-13	1	SERPINB6
GLIPR1	4.50863e-17	0.601043	0.341	0.174	6.18314e-13	1	GLIPR1
UQCRFS1	6.65943e-17	0.602482	0.435	0.252	9.13275e-13	1	UQCRFS1
TNFRSF1B	1.85066e-16	0.879249	0.254	0.115	2.53799e-12	1	TNFRSF1B
H3F3B	3.28317e-16	0.448972	0.99	0.953	4.50254e-12	1	H3F3B
STX10	3.47325e-16	0.720037	0.262	0.121	4.76322e-12	1	STX10
SPG21	4.25951e-16	0.637087	0.301	0.147	5.8415e-12	1	SPG21
NDUFB1	4.77044e-16	0.623084	0.303	0.151	6.54218e-12	1	NDUFB1
UQCR11.1	4.84245e-16	0.6014	0.695	0.536	6.64094e-12	1	UQCR11.1
PSMB3	6.79254e-16	0.58686	0.524	0.348	9.31529e-12	1	PSMB3
COX4I1	7.69908e-16	0.399185	0.933	0.892	1.05585e-11	1	COX4I1
SEC11A	1.50437e-15	0.704903	0.474	0.295	2.0631e-11	1	SEC11A
ATG3	3.33683e-15	0.554228	0.337	0.183	4.57613e-11	1	ATG3
PLSCR1	3.45856e-15	0.617644	0.25	0.115	4.74307e-11	1	PLSCR1
NDUFS6	4.65579e-15	0.565494	0.36	0.2	6.38495e-11	1	NDUFS6
LAP3	6.68324e-15	0.602604	0.264	0.13	9.1654e-11	1	LAP3
YBX1	1.11423e-14	0.4823	0.856	0.803	1.52805e-10	1	YBX1
REEP5	1.60672e-14	0.523513	0.398	0.23	2.20345e-10	1	REEP5
PARVG	1.77588e-14	0.573	0.264	0.128	2.43544e-10	1	PARVG
GRB2	2.123e-14	0.486053	0.303	0.158	2.91148e-10	1	GRB2
UQCRC1	3.22024e-14	0.711883	0.303	0.159	4.41624e-10	1	UQCRC1
ATP5E	3.25527e-14	0.390132	0.846	0.727	4.46427e-10	1	ATP5E
UBA52	3.25991e-14	0.257933	0.99	0.969	4.47064e-10	1	UBA52
EIF4E2	5.50398e-14	0.579321	0.262	0.132	7.54816e-10	1	EIF4E2
COX5B	5.95092e-14	0.662888	0.622	0.473	8.16109e-10	1	COX5B
EPSTI1	6.34457e-14	0.569645	0.293	0.154	8.70094e-10	1	EPSTI1
ZNHIT1	7.05258e-14	0.627516	0.402	0.245	9.6719e-10	1	ZNHIT1
DUSP1	7.67284e-14	0.453049	0.939	0.873	1.05225e-09	1	DUSP1
CASP4	1.30021e-13	0.782298	0.447	0.286	1.78311e-09	1	CASP4
PRDX5	1.95901e-13	0.556546	0.486	0.324	2.68659e-09	1	PRDX5
C11orf31	2.72162e-13	0.576301	0.577	0.415	3.73243e-09	1	C11orf31
GNB2	3.41119e-13	0.485621	0.39	0.236	4.67811e-09	1	GNB2
RNF7	5.16651e-13	0.478701	0.376	0.221	7.08536e-09	1	RNF7
MYADM	6.18062e-13	0.828188	0.299	0.167	8.4761e-09	1	MYADM
CD97	6.3932e-13	0.52789	0.343	0.197	8.76764e-09	1	CD97
NDUFA13	8.14043e-13	0.573272	0.587	0.431	1.11638e-08	1	NDUFA13
PPT1	8.94974e-13	0.748923	0.307	0.165	1.22737e-08	1	PPT1
VAMP5	1.05453e-12	0.685335	0.337	0.198	1.44618e-08	1	VAMP5
UBE2L6	1.1705e-12	0.603062	0.472	0.314	1.60522e-08	1	UBE2L6
HSD17B11	1.2237e-12	0.656881	0.39	0.24	1.67818e-08	1	HSD17B11
EIF1	1.52724e-12	0.250004	0.992	0.98	2.09446e-08	1	EIF1
BLOC1S1	1.84311e-12	0.380187	0.447	0.28	2.52764e-08	1	BLOC1S1
CHMP4B	1.92776e-12	0.462642	0.285	0.15	2.64374e-08	1	CHMP4B
ARF5	2.61533e-12	0.502434	0.425	0.27	3.58666e-08	1	ARF5
DOK2	2.66225e-12	0.603736	0.358	0.214	3.65101e-08	1	DOK2
MCL1	4.33076e-12	0.597102	0.526	0.38	5.9392e-08	1	MCL1
IFI27L2	6.98846e-12	0.531374	0.268	0.14	9.58398e-08	1	IFI27L2
PSMA7	1.03968e-11	0.585881	0.667	0.536	1.42581e-07	1	PSMA7
VASP	1.12569e-11	0.444472	0.404	0.244	1.54377e-07	1	VASP
HMGB2	1.16166e-11	0.451316	0.445	0.293	1.59311e-07	1	HMGB2
GNAS	1.35571e-11	0.468463	0.421	0.271	1.85921e-07	1	GNAS
EIF3K	1.40871e-11	0.374056	0.797	0.722	1.93191e-07	1	EIF3K
TGFB1	1.51235e-11	0.667057	0.307	0.176	2.07404e-07	1	TGFB1
PPP4C	1.93352e-11	0.516666	0.413	0.263	2.65163e-07	1	PPP4C
IFI35	2.16879e-11	0.615313	0.283	0.158	2.97428e-07	1	IFI35
MRPL23	4.47405e-11	0.582326	0.404	0.262	6.13572e-07	1	MRPL23
GMFG	4.96045e-11	0.323035	0.778	0.678	6.80276e-07	1	GMFG
NAAA	4.99502e-11	0.570888	0.278	0.157	6.85018e-07	1	NAAA
RNF181	5.02017e-11	0.404319	0.323	0.193	6.88466e-07	1	RNF181
C14orf2	1.0104e-10	0.543387	0.264	0.148	1.38566e-06	1	C14orf2
LSMD1	1.12893e-10	0.531508	0.274	0.153	1.54821e-06	1	LSMD1
GNG5	1.19904e-10	0.554405	0.402	0.268	1.64436e-06	1	GNG5
OAS1	1.62668e-10	0.375727	0.301	0.171	2.23082e-06	1	OAS1
NDUFB11	1.69354e-10	0.469891	0.522	0.379	2.32253e-06	1	NDUFB11
PHPT1	3.1299e-10	0.46402	0.256	0.142	4.29234e-06	1	PHPT1
ID2	3.61849e-10	0.34921	0.508	0.358	4.9624e-06	1	ID2
DYNLL1	4.43143e-10	0.36065	0.453	0.312	6.07727e-06	1	DYNLL1
SNX3	7.32213e-10	0.339814	0.571	0.437	1.00416e-05	1	SNX3
MT-ND3	1.1079e-09	0.439413	0.309	0.183	1.51938e-05	1	MT-ND3
SNF8	1.52612e-09	0.614243	0.285	0.17	2.09292e-05	1	SNF8
LTA4H	1.95795e-09	0.488999	0.252	0.142	2.68513e-05	1	LTA4H
CLTB	2.05769e-09	0.449889	0.289	0.17	2.82191e-05	1	CLTB
COX17	2.37667e-09	0.470913	0.285	0.171	3.25937e-05	1	COX17
CYC1	3.74688e-09	0.381645	0.293	0.171	5.13847e-05	1	CYC1
FIBP	3.91767e-09	0.559836	0.26	0.152	5.37269e-05	1	FIBP
KLF6	4.19104e-09	0.370532	0.756	0.62	5.74759e-05	1	KLF6
BAG1	1.20509e-08	0.420051	0.264	0.155	0.000165267	1	BAG1
SMS	1.27251e-08	0.355682	0.254	0.148	0.000174512	1	SMS
FLNA	1.44489e-08	0.40566	0.309	0.189	0.000198152	1	FLNA
SF3B5	1.44839e-08	0.677545	0.492	0.368	0.000198632	1	SF3B5
ATP5I	1.58384e-08	0.570006	0.38	0.268	0.000217208	1	ATP5I
ANAPC11	1.71813e-08	0.41622	0.346	0.222	0.000235624	1	ANAPC11
METTL9	1.78624e-08	0.517469	0.343	0.231	0.000244965	1	METTL9
COPE	1.99926e-08	0.474374	0.549	0.408	0.000274178	1	COPE
CAST	2.0977e-08	0.377663	0.25	0.144	0.000287679	1	CAST
NDUFB10	2.64446e-08	0.495395	0.427	0.309	0.000362662	1	NDUFB10
UBL5	3.42031e-08	0.565559	0.551	0.42	0.000469062	1	UBL5
MRPL54	4.10996e-08	0.425165	0.317	0.205	0.00056364	1	MRPL54
RGS19	4.92872e-08	0.299806	0.368	0.246	0.000675924	1	RGS19
SDHB	9.61483e-08	0.849247	0.303	0.196	0.00131858	1	SDHB
SSR3	1.09327e-07	0.481288	0.266	0.163	0.00149931	1	SSR3
ZFAND5	1.15481e-07	0.437407	0.254	0.155	0.0015837	1	ZFAND5
IDH3G	1.39773e-07	0.630709	0.285	0.181	0.00191685	1	IDH3G
AHNAK	1.67163e-07	0.41434	0.368	0.253	0.00229247	1	AHNAK
MYO1F	1.71417e-07	0.396522	0.329	0.216	0.00235082	1	MYO1F
CHMP1B	1.73281e-07	0.449492	0.346	0.239	0.00237637	1	CHMP1B
OXA1L	1.83254e-07	0.333237	0.291	0.182	0.00251315	1	OXA1L
LRRFIP1	2.12563e-07	0.458332	0.441	0.336	0.00291508	1	LRRFIP1
SH3BGRL	2.16227e-07	0.326	0.533	0.419	0.00296534	1	SH3BGRL
COX5A	2.74508e-07	0.512928	0.451	0.327	0.0037646	1	COX5A
ARL6IP4	4.78563e-07	0.322896	0.596	0.476	0.00656301	1	ARL6IP4
UQCR10	5.74802e-07	0.435241	0.439	0.326	0.00788283	1	UQCR10
ATP5J2	7.39184e-07	0.398008	0.421	0.304	0.0101372	1	ATP5J2
HN1	1.01208e-06	0.285917	0.333	0.222	0.0138797	1	HN1
WASF2	1.06911e-06	0.328081	0.272	0.177	0.0146617	1	WASF2
ENY2	1.14951e-06	0.491656	0.276	0.178	0.0157643	1	ENY2
ATP5EP2	1.37212e-06	0.41526	0.368	0.261	0.0188173	1	ATP5EP2
SQSTM1	1.47403e-06	0.340159	0.291	0.188	0.0202149	1	SQSTM1
NDUFA2	2.58132e-06	0.273575	0.337	0.24	0.0354002	1	NDUFA2
CKLF	4.83049e-06	0.374942	0.289	0.197	0.0662453	1	CKLF
SRSF9	5.46312e-06	0.477948	0.39	0.288	0.0749212	1	SRSF9
UQCRQ	9.22855e-06	0.355727	0.374	0.273	0.12656	1	UQCRQ
PRDX6	1.35516e-05	0.282809	0.366	0.267	0.185846	1	PRDX6
NEDD8	1.38568e-05	0.397916	0.573	0.481	0.190032	1	NEDD8
C19orf53	1.52188e-05	0.273143	0.494	0.394	0.208711	1	C19orf53
ALKBH7	2.03791e-05	0.532692	0.309	0.219	0.279479	1	ALKBH7
FIS1	2.29171e-05	0.27901	0.413	0.312	0.314285	1	FIS1
HADHA	2.4212e-05	0.295807	0.278	0.192	0.332043	1	HADHA
NDUFB7	4.17436e-05	0.299892	0.364	0.269	0.572471	1	NDUFB7
PCBP1	4.22147e-05	0.37067	0.535	0.438	0.578933	1	PCBP1
XAF1	5.00755e-05	0.328634	0.274	0.194	0.686736	1	XAF1
CALM2	5.71504e-05	0.324063	0.593	0.524	0.783761	1	CALM2
PGAM1	6.36974e-05	0.360983	0.301	0.221	0.873546	1	PGAM1
PSMB7	7.36542e-05	0.419993	0.39	0.298	1	1	PSMB7
ATF4	7.38922e-05	0.290301	0.307	0.224	1	1	ATF4
MRPL20	8.71628e-05	0.272147	0.319	0.236	1	1	MRPL20
POLR2J	9.52443e-05	0.27423	0.321	0.24	1	1	POLR2J
RBX1	0.000111313	0.364735	0.366	0.274	1	1	RBX1
PSME2	0.000124305	0.348388	0.602	0.54	1	1	PSME2
C1orf43	0.000129527	0.292523	0.293	0.212	1	1	C1orf43
ATP5H	0.000144017	0.316743	0.421	0.341	1	1	ATP5H
SCAND1	0.000161792	0.417536	0.37	0.287	1	1	SCAND1
CHMP2A	0.000190205	0.328802	0.327	0.247	1	1	CHMP2A
PARK7	0.000274193	0.31889	0.551	0.471	1	1	PARK7
NDUFA3	0.000476393	0.261908	0.293	0.216	1	1	NDUFA3
ATP5L	0.000543754	0.259728	0.742	0.685	1	1	ATP5L
JTB	0.000574334	0.313694	0.486	0.41	1	1	JTB
ATP5G3	0.000624854	0.262749	0.482	0.417	1	1	ATP5G3
ZNF706	0.00068673	0.30971	0.374	0.299	1	1	ZNF706
MSN	0.00133379	0.277958	0.343	0.27	1	1	MSN
APRT	0.00156819	0.278222	0.636	0.562	1	1	APRT
NDUFS8	0.00159883	0.276679	0.293	0.226	1	1	NDUFS8
TRAPPC1	0.00180183	0.266673	0.518	0.43	1	1	TRAPPC1
AURKAIP1	0.00317766	0.333476	0.335	0.274	1	1	AURKAIP1
SSR4	0.00460288	0.364564	0.608	0.558	1	1	SSR4
LAMTOR5	0.00753176	0.450888	0.329	0.267	1	1	LAMTOR5
CRIP1	0.00830588	0.381593	0.411	0.358	1	1	CRIP1
TNFRSF4	3.30576e-87	1.16786	0.262	0.019	4.53352e-83	2	TNFRSF4
LTB1	7.2063e-84	1.27748	0.986	0.648	9.88272e-80	2	LTB
IL32	1.17756e-79	1.17812	0.944	0.481	1.61491e-75	2	IL32
IL7R1	1.07736e-61	1.17769	0.754	0.336	1.47749e-57	2	IL7R
CD3D1	9.75056e-61	0.84498	0.913	0.447	1.33719e-56	2	CD3D
LDHB1	6.80736e-59	0.923148	0.953	0.617	9.33562e-55	2	LDHB
AQP3	5.23651e-58	1.32079	0.433	0.116	7.18135e-54	2	AQP3
CD21	1.82973e-53	1.11894	0.649	0.255	2.5093e-49	2	CD2
CD40LG	1.71215e-48	0.927645	0.304	0.066	2.34804e-44	2	CD40LG
CD3E1	6.37016e-46	0.84084	0.82	0.418	8.73604e-42	2	CD3E
TRAT11	6.68714e-45	0.876545	0.412	0.124	9.17075e-41	2	TRAT1
TPT11	1.06079e-43	0.452327	0.995	0.982	1.45477e-39	2	TPT1
B2M	6.42692e-36	0.29128	1	1	8.81387e-32	2	B2M
TRADD	1.9689e-33	0.711145	0.382	0.138	2.70015e-29	2	TRADD
SPOCK21	1.09712e-30	0.687234	0.429	0.169	1.50459e-26	2	SPOCK2
GIMAP71	5.51403e-30	0.583071	0.778	0.489	7.56195e-26	2	GIMAP7
PLP2	7.06687e-30	0.831172	0.574	0.297	9.69151e-26	2	PLP2
JUNB1	8.77859e-30	0.553551	0.984	0.886	1.2039e-25	2	JUNB
RPS121	1.2603e-29	0.336294	1	0.991	1.72838e-25	2	RPS12
RPS251	1.75647e-29	0.365631	1	0.975	2.40882e-25	2	RPS25
CD3G1	7.47487e-29	0.645466	0.443	0.176	1.0251e-24	2	CD3G
ANXA1	2.23874e-28	0.667685	0.808	0.549	3.07021e-24	2	ANXA1
VIM1	3.14077e-28	0.498473	0.951	0.766	4.30725e-24	2	VIM
RPLP01	5.39387e-28	0.459866	0.991	0.94	7.39715e-24	2	RPLP0
TTC39C	6.74724e-28	0.657836	0.304	0.101	9.25317e-24	2	TTC39C
HINT11	1.26825e-27	0.534387	0.843	0.601	1.73928e-23	2	HINT1
MYL12A	1.33246e-27	0.460914	0.974	0.85	1.82733e-23	2	MYL12A
RPSA1	9.05326e-27	0.401655	0.998	0.945	1.24156e-22	2	RPSA
MAL1	1.35608e-26	0.73459	0.295	0.101	1.85973e-22	2	MAL
TMEM661	2.70111e-26	0.567498	0.918	0.696	3.7043e-22	2	TMEM66
2021-06-01	3.36733e-26	0.60188	0.904	0.707	4.61796e-22	2	JUN
RPS31	5.92493e-26	0.289385	1	0.993	8.12545e-22	2	RPS3
OPTN	7.00299e-26	0.814161	0.314	0.111	9.6039e-22	2	OPTN
LCK1	3.95603e-25	0.60768	0.607	0.313	5.4253e-21	2	LCK
PRDX21	1.31403e-24	0.565722	0.513	0.245	1.80206e-20	2	PRDX2
RPS181	2.8949e-24	0.288106	0.998	0.996	3.97006e-20	2	RPS18
GSTK1	9.12402e-24	0.647832	0.749	0.512	1.25127e-19	2	GSTK1
RPS101	9.46184e-24	0.325992	1	0.963	1.2976e-19	2	RPS10
RPS291	9.7405e-24	0.388602	0.986	0.911	1.33581e-19	2	RPS29
ITM2A	1.06809e-23	0.58513	0.276	0.098	1.46478e-19	2	ITM2A
FLT3LG1	1.1731e-23	0.529226	0.349	0.139	1.60879e-19	2	FLT3LG
RPL361	1.17941e-23	0.349236	0.995	0.95	1.61745e-19	2	RPL36
EEF1A11	5.53994e-23	0.302407	1	0.987	7.59747e-19	2	EEF1A1
SUSD3	6.25716e-23	0.787359	0.293	0.112	8.58107e-19	2	SUSD3
AES1	2.22162e-22	0.621984	0.728	0.443	3.04673e-18	2	AES
RPL141	2.52601e-22	0.300957	0.995	0.984	3.46417e-18	2	RPL14
HLA-A	3.6438e-22	0.291594	0.998	0.956	4.99711e-18	2	HLA-A
CORO1B	1.21644e-21	0.724186	0.316	0.135	1.66822e-17	2	CORO1B
ARHGAP15	2.17586e-21	0.580917	0.466	0.24	2.98397e-17	2	ARHGAP15
NOSIP1	3.7032e-21	0.533426	0.649	0.385	5.07857e-17	2	NOSIP
RPL23A1	4.22114e-21	0.302309	1	0.988	5.78887e-17	2	RPL23A
GPR183	4.55045e-21	0.405515	0.262	0.094	6.24049e-17	2	GPR183
IFITM1	8.47171e-21	0.557773	0.689	0.434	1.16181e-16	2	IFITM1
RPL301	8.88408e-21	0.302947	1	0.98	1.21836e-16	2	RPL30
TNFAIP8	1.10544e-20	0.799054	0.445	0.218	1.516e-16	2	TNFAIP8
SIT1	1.35808e-20	0.603326	0.295	0.116	1.86247e-16	2	SIT1
FXYD5	1.65822e-20	0.508614	0.883	0.7	2.27408e-16	2	FXYD5
PBXIP1	2.56663e-20	0.548574	0.319	0.131	3.51987e-16	2	PBXIP1
CD271	2.79688e-20	0.561554	0.424	0.203	3.83565e-16	2	CD27
EVL1	7.19107e-20	0.485323	0.742	0.491	9.86183e-16	2	EVL
ALOX5AP	9.58847e-20	0.471141	0.424	0.199	1.31496e-15	2	ALOX5AP
PPP2R5C	9.6494e-20	0.735659	0.424	0.209	1.32332e-15	2	PPP2R5C
CD52	1.40603e-19	0.379885	0.979	0.876	1.92822e-15	2	CD52
CALM1	2.27029e-19	0.456876	0.836	0.644	3.11348e-15	2	CALM1
RPS27A1	7.4896e-19	0.302366	0.998	0.967	1.02712e-14	2	RPS27A
RPS271	9.97083e-19	0.273702	1	0.992	1.3674e-14	2	RPS27
RPL27A1	1.06245e-18	0.259378	0.998	0.989	1.45704e-14	2	RPL27A
RPS15A1	1.85018e-18	0.27658	0.998	0.983	2.53734e-14	2	RPS15A
RPL13A1	2.45932e-18	0.250025	1	0.999	3.37271e-14	2	RPL13A
YWHAQ	8.67646e-18	0.522046	0.471	0.252	1.18989e-13	2	YWHAQ
LAT1	9.0134e-18	0.545262	0.391	0.186	1.2361e-13	2	LAT
RGCC1	9.4912e-18	0.539956	0.396	0.198	1.30162e-13	2	RGCC
NPM11	1.61531e-17	0.324139	0.941	0.798	2.21524e-13	2	NPM1
HSPA81	2.0241e-17	0.456172	0.838	0.637	2.77585e-13	2	HSPA8
GIMAP51	3.27167e-17	0.344639	0.459	0.249	4.48677e-13	2	GIMAP5
ACAP11	3.79376e-17	0.336364	0.501	0.265	5.20277e-13	2	ACAP1
ZFP36L21	5.66566e-17	0.518933	0.813	0.619	7.76988e-13	2	ZFP36L2
ARL6IP5	6.65038e-17	0.471795	0.644	0.417	9.12033e-13	2	ARL6IP5
LEF11	1.60997e-16	0.475167	0.304	0.136	2.20791e-12	2	LEF1
RPS201	5.23992e-16	0.298363	0.995	0.945	7.18603e-12	2	RPS20
RPS211	5.68332e-16	0.332034	0.965	0.841	7.7941e-12	2	RPS21
FOS	6.02865e-16	0.334998	0.972	0.905	8.26769e-12	2	FOS
CRIP11	6.81014e-16	0.473579	0.555	0.332	9.33942e-12	2	CRIP1
RPS71	9.59682e-16	0.251553	1	0.987	1.31611e-11	2	RPS7
BIRC3	2.6743e-15	0.437583	0.253	0.106	3.66754e-11	2	BIRC3
CD691	4.2227e-15	0.621412	0.536	0.326	5.791e-11	2	CD69
BIN1	5.53465e-15	0.454978	0.41	0.216	7.59021e-11	2	BIN1
IL2RG	1.07849e-14	0.368693	0.637	0.397	1.47904e-10	2	IL2RG
TMEM1231	1.60631e-14	0.365585	0.616	0.389	2.20289e-10	2	TMEM123
RPL36A1	2.04553e-14	0.297108	0.96	0.894	2.80524e-10	2	RPL36A
GIMAP41	3.07735e-14	0.708116	0.628	0.424	4.22028e-10	2	GIMAP4
MZT2A1	3.62215e-14	0.413785	0.424	0.231	4.96741e-10	2	MZT2A
RPSAP581	4.02196e-14	0.376132	0.852	0.707	5.51571e-10	2	RPSAP58
FYB1	6.66069e-14	0.397916	0.532	0.336	9.13447e-10	2	FYB
RPL171	3.16076e-13	0.26551	0.988	0.952	4.33467e-09	2	RPL17
DNAJB11	3.98455e-13	0.427119	0.45	0.262	5.46442e-09	2	DNAJB1
PEBP11	1.61312e-12	0.519679	0.539	0.348	2.21223e-08	2	PEBP1
SOD11	2.19075e-12	0.451938	0.674	0.478	3.0044e-08	2	SOD1
LIMS1	2.97777e-12	0.439054	0.269	0.134	4.08371e-08	2	LIMS1
TNFAIP3	2.97968e-12	0.595516	0.281	0.14	4.08633e-08	2	TNFAIP3
TXN	5.01e-12	0.369523	0.33	0.176	6.87071e-08	2	TXN
PIM1	7.55334e-12	0.378101	0.316	0.161	1.03586e-07	2	PIM1
UBC	1.0087e-11	0.253364	0.958	0.828	1.38334e-07	2	UBC
ITM2B	1.77509e-11	0.289558	0.913	0.762	2.43436e-07	2	ITM2B
2021-09-01	1.78777e-11	0.363366	0.372	0.205	2.45175e-07	2	2021-09-01
TUBA4A	6.1773e-11	0.403241	0.384	0.225	8.47155e-07	2	TUBA4A
OCIAD21	1.07829e-10	0.392438	0.361	0.2	1.47876e-06	2	OCIAD2
PIK3IP11	2.91014e-10	0.412703	0.379	0.223	3.99097e-06	2	PIK3IP1
TSTD1	6.38973e-10	0.337417	0.351	0.201	8.76288e-06	2	TSTD1
ANKRD12	9.09533e-10	0.305383	0.436	0.264	1.24733e-05	2	ANKRD12
DDX51	1.55924e-09	0.302916	0.909	0.791	2.13834e-05	2	DDX5
KLF61	1.95451e-09	0.377429	0.785	0.618	2.68041e-05	2	KLF6
ISG20	2.10111e-09	0.368057	0.625	0.426	2.88147e-05	2	ISG20
HNRNPF	2.15723e-09	0.401602	0.527	0.352	2.95842e-05	2	HNRNPF
LEPROTL11	2.31125e-09	0.489561	0.384	0.234	3.16965e-05	2	LEPROTL1
PSMC5	4.56407e-09	0.524045	0.415	0.264	6.25916e-05	2	PSMC5
RWDD1	4.75813e-09	0.479481	0.382	0.232	6.52531e-05	2	RWDD1
TECR	6.20865e-09	0.272323	0.333	0.187	8.51455e-05	2	TECR
PRKCQ-AS11	6.43874e-09	0.28587	0.274	0.147	8.83009e-05	2	PRKCQ-AS1
CCDC107	1.20249e-08	0.337911	0.269	0.15	0.00016491	2	CCDC107
COX6C1	1.29439e-08	0.331577	0.604	0.42	0.000177513	2	COX6C
CD99	1.31043e-08	0.306039	0.677	0.47	0.000179712	2	CD99
TCF71	1.61156e-08	0.476011	0.342	0.21	0.000221009	2	TCF7
RAN	1.69405e-08	0.296816	0.614	0.457	0.000232322	2	RAN
TSC22D3	1.79825e-08	0.355373	0.843	0.731	0.000246612	2	TSC22D3
SBDS1	1.85206e-08	0.327507	0.311	0.185	0.000253992	2	SBDS
SOCS31	3.14361e-08	0.351741	0.272	0.155	0.000431115	2	SOCS3
EIF4A21	5.47258e-08	0.330876	0.763	0.615	0.00075051	2	EIF4A2
SKP1	5.97099e-08	0.3682	0.604	0.44	0.000818862	2	SKP1
DUSP2	8.9373e-08	0.317957	0.377	0.236	0.00122566	2	DUSP2
MYL12B	9.30153e-08	0.28589	0.817	0.674	0.00127561	2	MYL12B
S100A101	1.13968e-07	0.300818	0.803	0.609	0.00156295	2	S100A10
RHOH1	1.17229e-07	0.287026	0.368	0.227	0.00160767	2	RHOH
DDIT4	1.26431e-07	0.44044	0.323	0.201	0.00173388	2	DDIT4
LDHA	1.45858e-07	0.284494	0.616	0.467	0.0020003	2	LDHA
CDC42SE2	1.6337e-07	0.264543	0.34	0.211	0.00224045	2	CDC42SE2
CCNL1	1.63777e-07	0.263151	0.377	0.242	0.00224604	2	CCNL1
2021-09-09	2.00379e-07	0.36482	0.459	0.314	0.002748	2	2021-09-09
ABHD14B	2.92893e-07	0.269388	0.258	0.148	0.00401673	2	ABHD14B
RPL411	4.73326e-07	0.293389	0.663	0.516	0.0064912	2	RPL41
PPA11	5.72648e-07	0.436536	0.426	0.292	0.00785329	2	PPA1
SLC2A31	7.90749e-07	0.655004	0.344	0.231	0.0108443	2	SLC2A3
NSMCE1	8.55589e-07	0.444298	0.276	0.173	0.0117335	2	NSMCE1
IL10RA	1.19916e-06	0.313848	0.304	0.193	0.0164453	2	IL10RA
TRAM1	1.46771e-06	0.427794	0.286	0.18	0.0201281	2	TRAM1
PDCD5	3.37237e-06	0.370001	0.269	0.171	0.0462487	2	PDCD5
DOK21	3.406e-06	0.348245	0.335	0.222	0.0467099	2	DOK2
KHDRBS1	3.49656e-06	0.422501	0.337	0.226	0.0479518	2	KHDRBS1
BTG21	3.98732e-06	0.30745	0.466	0.337	0.0546821	2	BTG2
MIF	4.84521e-06	0.288874	0.529	0.39	0.0664472	2	MIF
IDS	5.24665e-06	0.266204	0.335	0.228	0.0719525	2	IDS
RNF167	6.28497e-06	0.268648	0.253	0.157	0.0861921	2	RNF167
KIF5B	6.65948e-06	0.623462	0.255	0.163	0.0913281	2	KIF5B
TAP1	6.8116e-06	0.379013	0.321	0.215	0.0934142	2	TAP1
RNASET2	7.5243e-06	0.274297	0.625	0.469	0.103188	2	RNASET2
HSP90AA1	1.81703e-05	0.27246	0.646	0.512	0.249187	2	HSP90AA1
MGST3	2.07711e-05	0.26011	0.302	0.198	0.284854	2	MGST3
CUTA1	2.09278e-05	0.331058	0.548	0.409	0.287004	2	CUTA
CD47	2.19087e-05	0.312027	0.34	0.231	0.300456	2	CD47
IK	2.33737e-05	0.30578	0.314	0.216	0.320547	2	IK
IER2	2.36002e-05	0.2757	0.738	0.612	0.323653	2	IER2
GTF3A	2.41608e-05	0.28539	0.642	0.495	0.331341	2	GTF3A
NDUFB4	3.04105e-05	0.341042	0.347	0.245	0.41705	2	NDUFB4
ARHGDIA	4.71626e-05	0.356316	0.372	0.274	0.646789	2	ARHGDIA
HSPE1	5.8029e-05	0.27415	0.295	0.195	0.79581	2	HSPE1
NUTF2	0.000106628	0.266938	0.258	0.176	1	2	NUTF2
TRMT112	0.000143359	0.333072	0.492	0.356	1	2	TRMT112
CHURC1	0.000156252	0.250574	0.267	0.179	1	2	CHURC1
OSTC	0.000250287	0.38543	0.258	0.174	1	2	OSTC
NDUFA12	0.000256488	0.276931	0.295	0.205	1	2	NDUFA12
DYNLRB1	0.000503356	0.287313	0.365	0.266	1	2	DYNLRB1
PTGES3	0.000543969	0.281642	0.504	0.386	1	2	PTGES3
EWSR1	0.0018668	0.350467	0.258	0.184	1	2	EWSR1
CAPZB	0.00286964	0.276651	0.656	0.537	1	2	CAPZB
NAP1L1	0.00389088	0.251749	0.684	0.552	1	2	NAP1L1
YWHAB	0.00689084	0.257924	0.583	0.486	1	2	YWHAB
RALY	0.00798742	0.252191	0.279	0.216	1	2	RALY
CCL5	4.31177e-238	3.28339	0.943	0.216	5.91316e-234	3	CCL5
GZMK	3.77191e-197	3.11922	0.562	0.044	5.1728e-193	3	GZMK
NKG7	2.77067e-182	2.11603	0.883	0.206	3.79969e-178	3	NKG7
GZMA	7.03842e-169	1.99394	0.724	0.114	9.65249e-165	3	GZMA
CST7	1.08531e-166	1.96223	0.711	0.113	1.48839e-162	3	CST7
CTSW	1.66741e-116	1.8381	0.755	0.224	2.28669e-112	3	CTSW
CD8A	1.29252e-114	1.8702	0.458	0.063	1.77257e-110	3	CD8A
LYAR	3.28462e-100	1.54509	0.549	0.124	4.50453e-96	3	LYAR
IL321	2.00325e-96	1.43165	0.943	0.49	2.74726e-92	3	IL32
KLRG1	1.50392e-92	1.67183	0.414	0.066	2.06248e-88	3	KLRG1
B2M1	2.53669e-89	0.645742	1	1	3.47881e-85	3	B2M
HLA-C	2.81369e-68	0.777838	0.99	0.978	3.8587e-64	3	HLA-C
GZMM	4.37771e-68	1.52564	0.57	0.192	6.00359e-64	3	GZMM
GZMH	1.12265e-65	2.36914	0.333	0.061	1.53961e-61	3	GZMH
CD3D2	5.96923e-62	1.11433	0.867	0.463	8.18621e-58	3	CD3D
CD8B	1.79497e-60	1.5772	0.378	0.084	2.46162e-56	3	CD8B
HOPX	9.89176e-58	1.39063	0.417	0.105	1.35656e-53	3	HOPX
HLA-A1	7.13599e-56	0.689296	0.992	0.958	9.78629e-52	3	HLA-A
PRF1	3.14225e-52	0.828949	0.424	0.114	4.30928e-48	3	PRF1
PTPRCAP	1.20253e-48	0.986815	0.878	0.601	1.64915e-44	3	PTPRCAP
MALAT11	3.16265e-41	0.516915	1	1	4.33726e-37	3	MALAT1
HCST	4.02334e-41	1.03398	0.75	0.504	5.5176e-37	3	HCST
SAMD3	1.9889e-35	0.995266	0.297	0.087	2.72758e-31	3	SAMD3
CCL4	3.22507e-33	0.873773	0.292	0.084	4.42286e-29	3	CCL4
HLA-B	3.90103e-31	0.554457	0.971	0.942	5.34988e-27	3	HLA-B
NCR3	1.1973e-30	1.29998	0.25	0.07	1.64198e-26	3	NCR3
APOBEC3G	9.91633e-29	1.29304	0.406	0.184	1.35993e-24	3	APOBEC3G
LCK2	1.94376e-28	0.815425	0.586	0.322	2.66568e-24	3	LCK
CD991	8.58346e-28	0.742137	0.698	0.471	1.17714e-23	3	CD99
CD3E2	7.84851e-27	0.771015	0.708	0.444	1.07634e-22	3	CD3E
CD22	2.50666e-25	0.870206	0.505	0.286	3.43764e-21	3	CD2
C12orf75	5.00787e-24	0.854444	0.299	0.112	6.8678e-20	3	C12orf75
MYL12A1	2.40837e-23	0.4098	0.938	0.858	3.30284e-19	3	MYL12A
DUSP21	8.73536e-23	1.07076	0.427	0.23	1.19797e-18	3	DUSP2
RARRES3	3.02517e-19	0.891316	0.625	0.443	4.14872e-15	3	RARRES3
HLA-E	2.44887e-18	0.454474	0.93	0.874	3.35838e-14	3	HLA-E
MT-CYB	4.1058e-17	0.472069	0.945	0.93	5.63069e-13	3	MT-CYB
CD247	2.88065e-14	0.421205	0.417	0.242	3.95053e-10	3	CD247
TPST2	1.84759e-13	0.799764	0.258	0.125	2.53378e-09	3	TPST2
ID21	3.44961e-13	0.700585	0.513	0.364	4.7308e-09	3	ID2
MT-ND2	1.33844e-12	0.497459	0.927	0.889	1.83554e-08	3	MT-ND2
CALM11	4.26188e-12	0.525622	0.75	0.662	5.84474e-08	3	CALM1
FYN	9.53868e-12	0.648265	0.271	0.147	1.30813e-07	3	FYN
RPS27A2	1.53715e-11	0.303293	0.995	0.968	2.10805e-07	3	RPS27A
PFN11	1.79106e-11	0.366759	0.974	0.937	2.45625e-07	3	PFN1
ARPC5L	2.17753e-11	0.622958	0.294	0.169	2.98626e-07	3	ARPC5L
MT-CO3	3.03667e-11	0.360755	0.987	0.979	4.16449e-07	3	MT-CO3
PPP2R5C1	4.5919e-11	0.609116	0.357	0.224	6.29733e-07	3	PPP2R5C
LAT2	4.84337e-11	0.595272	0.333	0.199	6.6422e-07	3	LAT
RPS32	7.4742e-11	0.265171	0.995	0.994	1.02501e-06	3	RPS3
GIMAP72	1.49984e-10	0.324587	0.643	0.517	2.05688e-06	3	GIMAP7
DDX52	2.28188e-10	0.332805	0.857	0.802	3.12937e-06	3	DDX5
BIN2	3.6627e-10	0.707625	0.466	0.351	5.02303e-06	3	BIN2
SLC9A3R1	7.52501e-10	0.628861	0.258	0.148	1.03198e-05	3	SLC9A3R1
CD3G2	1.1218e-09	0.755074	0.312	0.203	1.53844e-05	3	CD3G
MT-ND4	1.57501e-09	0.368288	0.964	0.958	2.15996e-05	3	MT-ND4
HLA-F	1.77836e-09	0.55724	0.424	0.314	2.43884e-05	3	HLA-F
GNLY	2.06932e-09	0.585766	0.279	0.163	2.83787e-05	3	GNLY
IL7R2	3.10227e-09	0.574684	0.497	0.386	4.25446e-05	3	IL7R
LITAF	3.51445e-09	0.815129	0.404	0.295	4.81971e-05	3	LITAF
IL2RG1	3.86607e-09	0.537009	0.531	0.419	5.30192e-05	3	IL2RG
CTSC	4.37115e-09	0.483925	0.372	0.25	5.9946e-05	3	CTSC
C9orf142	7.86803e-09	0.971124	0.336	0.227	0.000107902	3	C9orf142
ARL4C	9.42444e-09	0.533372	0.297	0.184	0.000129247	3	ARL4C
MYL12B1	1.10614e-08	0.434807	0.729	0.691	0.000151696	3	MYL12B
ANXA11	2.14698e-08	0.478147	0.672	0.576	0.000294437	3	ANXA1
PIM11	2.42204e-08	0.560307	0.273	0.171	0.000332159	3	PIM1
MYO1F1	5.67496e-08	0.561899	0.326	0.222	0.000778264	3	MYO1F
2021-09-07	6.67755e-08	0.433247	0.43	0.323	0.00091576	3	2021-09-07
CD71	6.81339e-08	0.461342	0.471	0.349	0.000934388	3	CD7
IFITM11	2.02913e-07	0.426625	0.562	0.46	0.00278275	3	IFITM1
YWHAQ1	2.12943e-07	0.576859	0.367	0.273	0.0029203	3	YWHAQ
SUN2	2.76145e-07	0.567274	0.336	0.236	0.00378706	3	SUN2
STK17A	2.94265e-07	0.354589	0.411	0.299	0.00403555	3	STK17A
PPP1R18	4.56702e-07	0.484021	0.362	0.272	0.00626322	3	PPP1R18
RPA2	5.74767e-07	0.444649	0.26	0.168	0.00788235	3	RPA2
CD53	1.30012e-06	0.359688	0.586	0.533	0.0178298	3	CD53
HSP90B1	1.48538e-06	0.403783	0.323	0.234	0.0203706	3	HSP90B1
HSP90AA11	1.66909e-06	0.305451	0.589	0.524	0.0228898	3	HSP90AA1
PTPRC	2.26829e-06	0.368826	0.513	0.444	0.0311074	3	PTPRC
SRSF7	2.44766e-06	0.424586	0.542	0.475	0.0335672	3	SRSF7
CXCR41	2.49684e-06	0.271013	0.667	0.587	0.0342416	3	CXCR4
RAP1B	2.73133e-06	0.307362	0.432	0.35	0.0374574	3	RAP1B
ZFP36L22	3.38799e-06	0.405272	0.695	0.642	0.0464629	3	ZFP36L2
ANXA2R	3.52573e-06	0.491061	0.25	0.167	0.0483518	3	ANXA2R
ANXA6	7.18344e-06	0.496837	0.367	0.282	0.0985137	3	ANXA6
HSPA5	1.13815e-05	0.523533	0.266	0.187	0.156086	3	HSPA5
DHRS7	1.30817e-05	0.400322	0.383	0.306	0.179402	3	DHRS7
HNRNPK	1.68404e-05	0.407266	0.529	0.487	0.23095	3	HNRNPK
TUBA4A1	2.02805e-05	0.356261	0.318	0.239	0.278127	3	TUBA4A
XBP1	2.02859e-05	0.456254	0.352	0.272	0.278201	3	XBP1
GUK1	4.28426e-05	0.330389	0.523	0.472	0.587544	3	GUK1
PPIA	0.000102729	0.344578	0.74	0.738	1	3	PPIA
ACTG1	0.000109457	0.333756	0.867	0.859	1	3	ACTG1
HSPA82	0.000115096	0.259025	0.695	0.665	1	3	HSPA8
BUB3	0.000161865	0.343074	0.273	0.204	1	3	BUB3
OCIAD22	0.000183136	0.423489	0.286	0.215	1	3	OCIAD2
UBB	0.00024558	0.281831	0.776	0.775	1	3	UBB
CCND31	0.000245963	0.392222	0.453	0.402	1	3	CCND3
SPOCK22	0.000285822	0.405485	0.268	0.2	1	3	SPOCK2
TAP11	0.000364862	0.379844	0.284	0.223	1	3	TAP1
KRTCAP2	0.00037412	0.37709	0.357	0.296	1	3	KRTCAP2
HNRNPA3	0.00040015	0.36739	0.357	0.306	1	3	HNRNPA3
BIN11	0.00042847	0.340286	0.299	0.238	1	3	BIN1
BTN3A2	0.00044203	0.313156	0.271	0.207	1	3	BTN3A2
ARL6IP51	0.000475771	0.566901	0.484	0.447	1	3	ARL6IP5
CKLF1	0.000579073	0.384934	0.266	0.205	1	3	CKLF
PPIB	0.00057953	0.418999	0.5	0.468	1	3	PPIB
CAPN2	0.000607113	0.510206	0.268	0.213	1	3	CAPN2
KMT2E	0.000616922	0.331949	0.294	0.234	1	3	KMT2E
ACAP12	0.000773389	0.501684	0.354	0.294	1	3	ACAP1
PDIA3	0.000773722	0.508569	0.378	0.328	1	3	PDIA3
VAMP2	0.00157834	0.328467	0.477	0.448	1	3	VAMP2
P4HB	0.00161335	0.327379	0.284	0.228	1	3	P4HB
S1PR4	0.00201011	0.498768	0.302	0.255	1	3	S1PR4
MEAF6	0.00206524	0.268428	0.315	0.266	1	3	MEAF6
SSR2	0.002118	0.329519	0.633	0.611	1	3	SSR2
GIMAP52	0.00253129	0.567537	0.331	0.274	1	3	GIMAP5
LCP1	0.00256914	0.281666	0.419	0.38	1	3	LCP1
CIRBP	0.00264055	0.319048	0.714	0.701	1	3	CIRBP
GIMAP11	0.00297996	0.370291	0.359	0.32	1	3	GIMAP1
SNRPB	0.00298009	0.414783	0.378	0.339	1	3	SNRPB
SPCS2	0.00311344	0.350551	0.344	0.295	1	3	SPCS2
SDHC	0.00325441	0.344976	0.255	0.207	1	3	SDHC
TMED9	0.00337325	0.413242	0.289	0.246	1	3	TMED9
GADD45B	0.00364815	0.2922	0.273	0.228	1	3	GADD45B
2021-09-11	0.00378249	0.313487	0.279	0.224	1	3	2021-09-01
TBC1D10C	0.00424018	0.390341	0.339	0.294	1	3	TBC1D10C
CALR	0.00438811	0.361626	0.315	0.271	1	3	CALR
DNAJB12	0.00478381	0.476615	0.326	0.286	1	3	DNAJB1
MT-ATP6	0.0052038	0.387213	0.721	0.75	1	3	MT-ATP6
TMEM50A	0.00568196	0.82872	0.297	0.26	1	3	TMEM50A
CDC37	0.00892373	0.610345	0.26	0.219	1	3	CDC37
C9orf16	0.00913108	0.388452	0.385	0.358	1	3	C9orf16
KLF62	0.0099329	0.283943	0.654	0.643	1	3	KLF6
CMPK1	0.00994875	0.448207	0.401	0.367	1	3	CMPK1
COX7A2	0.0099936	0.320122	0.424	0.395	1	3	COX7A2
CD79A	0	4.28879	0.934	0.042	0	4	CD79A
MS4A1	0	3.40055	0.857	0.052	0	4	MS4A1
LINC00926	9.96522e-279	2.8428	0.563	0.009	1.36663e-274	4	LINC00926
CD79B	5.97425e-276	3.46258	0.911	0.143	8.19309e-272	4	CD79B
TCL1A	8.20873e-276	3.59006	0.62	0.022	1.12574e-271	4	TCL1A
HLA-DQA1	4.6244e-270	3.067	0.886	0.117	6.3419e-266	4	HLA-DQA1
VPREB3	2.05324e-240	2.42871	0.486	0.007	2.81582e-236	4	VPREB3
HLA-DQB1	4.08226e-233	3.08043	0.86	0.146	5.59841e-229	4	HLA-DQB1
CD74	9.19891e-189	2.93664	1	0.818	1.26154e-184	4	CD74
HLA-DRA1	9.05876e-188	2.77292	1	0.49	1.24232e-183	4	HLA-DRA
HLA-DPB11	1.42232e-169	2.36712	0.986	0.444	1.95058e-165	4	HLA-DPB1
FCER2	1.15099e-168	2.07377	0.377	0.01	1.57846e-164	4	FCER2
BANK1	1.80614e-161	2.08798	0.48	0.037	2.47694e-157	4	BANK1
HLA-DRB11	4.96886e-157	2.06739	0.98	0.38	6.8143e-153	4	HLA-DRB1
HLA-DPA11	1.70736e-146	2.00754	0.977	0.419	2.34147e-142	4	HLA-DPA1
HLA-DQA2	1.76766e-139	2.10965	0.52	0.064	2.42417e-135	4	HLA-DQA2
TSPAN13	5.53542e-139	1.65775	0.309	0.007	7.59128e-135	4	TSPAN13
FCRLA	8.59042e-139	1.7347	0.297	0.006	1.17809e-134	4	FCRLA
CD37	9.63961e-133	1.92526	0.963	0.734	1.32198e-128	4	CD37
HLA-DRB51	1.91859e-121	1.89091	0.846	0.274	2.63115e-117	4	HLA-DRB5
HVCN1	7.49259e-121	1.86042	0.489	0.068	1.02753e-116	4	HVCN1
PKIG	2.21905e-118	1.52538	0.277	0.009	3.04321e-114	4	PKIG
HLA-DOB	7.43845e-117	1.50509	0.286	0.011	1.02011e-112	4	HLA-DOB
BLK	3.08233e-102	1.50016	0.283	0.016	4.22711e-98	4	BLK
HLA-DMA1	4.0286e-102	1.95393	0.689	0.199	5.52482e-98	4	HLA-DMA
CD72	8.19382e-100	1.56129	0.263	0.013	1.1237e-95	4	CD72
GNG7	2.38344e-98	1.42945	0.286	0.018	3.26865e-94	4	GNG7
PDLIM1	1.84214e-96	1.39486	0.314	0.026	2.52631e-92	4	PDLIM1
HLA-DMB1	3.64304e-93	1.86265	0.543	0.124	4.99607e-89	4	HLA-DMB
CD40	3.48895e-86	1.38169	0.291	0.026	4.78474e-82	4	CD40
P2RX5	6.12832e-86	1.59412	0.271	0.021	8.40438e-82	4	P2RX5
EAF2	1.51115e-73	1.65616	0.346	0.056	2.07239e-69	4	EAF2
PPAPDC1B	6.84754e-72	1.53521	0.314	0.045	9.39071e-68	4	PPAPDC1B
IRF8	6.19884e-71	1.74343	0.374	0.07	8.50109e-67	4	IRF8
RPL18A1	1.20512e-65	0.59872	1	0.992	1.6527e-61	4	RPL18A
2021-03-01	1.05396e-60	1.41732	0.286	0.045	1.4454e-56	4	2021-03-01
QRSL1	3.68611e-60	1.32544	0.266	0.037	5.05513e-56	4	QRSL1
CYB561A3	5.40959e-60	1.37719	0.32	0.059	7.41871e-56	4	CYB561A3
MEF2C	6.35667e-55	1.32238	0.266	0.043	8.71754e-51	4	MEF2C
SMIM14	1.95686e-53	1.49262	0.323	0.069	2.68364e-49	4	SMIM14
RPS231	3.00815e-52	0.625762	1	0.979	4.12537e-48	4	RPS23
RPS11	8.62203e-52	0.683037	0.991	0.939	1.18242e-47	4	RPS11
LY861	2.47629e-49	1.25249	0.46	0.149	3.39598e-45	4	LY86
PLEKHF2	7.27805e-48	1.29971	0.289	0.06	9.98112e-44	4	PLEKHF2
RPS51	3.12413e-47	0.551419	0.994	0.973	4.28443e-43	4	RPS5
SNX2	9.04034e-45	1.30128	0.463	0.174	1.23979e-40	4	SNX2
LTB2	2.37623e-44	0.729205	0.931	0.667	3.25877e-40	4	LTB
ISG201	4.77632e-40	1.2104	0.691	0.423	6.55025e-36	4	ISG20
CXCR42	2.25437e-38	1.10857	0.809	0.567	3.09165e-34	4	CXCR4
NCF11	6.08605e-38	1.16469	0.389	0.132	8.34641e-34	4	NCF1
RPL13A2	2.95336e-37	0.412472	1	0.999	4.05023e-33	4	RPL13A
LAPTM5	9.18353e-37	1.02297	0.871	0.775	1.25943e-32	4	LAPTM5
SNHG7	3.7631e-36	1.47975	0.497	0.229	5.16072e-32	4	SNHG7
RPS81	6.81473e-34	0.431951	1	0.985	9.34572e-30	4	RPS8
RPL151	5.50046e-33	0.375263	0.997	0.993	7.54333e-29	4	RPL15
LAT21	1.19759e-30	1.29803	0.251	0.069	1.64237e-26	4	LAT2
RPL8	1.32434e-30	0.427143	1	0.985	1.8162e-26	4	RPL8
FAIM3	2.77912e-29	1.14803	0.409	0.178	3.81129e-25	4	FAIM3
RPL181	2.32847e-27	0.380806	0.994	0.981	3.19326e-23	4	RPL18
RPS272	1.38967e-25	0.378672	0.997	0.993	1.90579e-21	4	RPS27
RPL10A1	6.13131e-24	0.369903	0.994	0.982	8.40847e-20	4	RPL10A
PTPRCAP1	1.44708e-23	0.726676	0.84	0.611	1.98453e-19	4	PTPRCAP
STX7	1.36044e-22	0.985026	0.269	0.101	1.86571e-18	4	STX7
CD521	7.14961e-22	0.544485	0.951	0.883	9.80498e-18	4	CD52
SYPL1	5.47342e-21	0.911059	0.294	0.121	7.50624e-17	4	SYPL1
GNB2L1	2.9969e-20	0.437286	0.991	0.974	4.10994e-16	4	GNB2L1
RPSA2	7.91167e-20	0.432851	0.986	0.948	1.08501e-15	4	RPSA
RPL121	6.70497e-19	0.346113	0.994	0.991	9.19519e-15	4	RPL12
LIMD2	1.20213e-18	0.567633	0.754	0.64	1.64861e-14	4	LIMD2
RPL29	8.58506e-18	0.328161	0.997	0.982	1.17736e-13	4	RPL29
FAU	9.40506e-17	0.306824	0.994	0.98	1.28981e-12	4	FAU
BIRC31	1.28914e-16	0.833769	0.257	0.11	1.76793e-12	4	BIRC3
PRKCB	1.08913e-15	0.877486	0.266	0.121	1.49363e-11	4	PRKCB
RPS182	1.97434e-15	0.268238	1	0.996	2.70762e-11	4	RPS18
RPL23A2	2.83981e-15	0.287384	1	0.988	3.89452e-11	4	RPL23A
RPS131	3.60822e-15	0.341909	0.994	0.959	4.94831e-11	4	RPS13
RPS212	1.29476e-14	0.430381	0.9	0.855	1.77564e-10	4	RPS21
RPL91	1.83438e-14	0.302063	0.997	0.972	2.51566e-10	4	RPL9
SNX31	2.37536e-14	0.789308	0.574	0.445	3.25757e-10	4	SNX3
EEF2	2.97472e-14	0.559811	0.86	0.826	4.07954e-10	4	EEF2
RPS191	5.49538e-14	0.260844	1	0.992	7.53637e-10	4	RPS19
FAM26F1	6.06652e-14	0.838962	0.36	0.206	8.31963e-10	4	FAM26F
RPL211	1.53119e-13	0.279118	0.997	0.99	2.09987e-09	4	RPL21
POLD4	3.54465e-13	0.805659	0.48	0.325	4.86113e-09	4	POLD4
EEF1B21	5.15566e-13	0.472431	0.909	0.879	7.07047e-09	4	EEF1B2
RPL37A1	5.53353e-13	0.319041	0.977	0.949	7.58868e-09	4	RPL37A
PLAC8	1.78845e-12	0.672701	0.566	0.435	2.45268e-08	4	PLAC8
RPL22L1	2.82099e-12	0.959594	0.323	0.18	3.8687e-08	4	RPL22L1
RPL371	1.08185e-11	0.289379	0.969	0.948	1.48365e-07	4	RPL37
RPL351	1.38216e-11	0.290165	0.98	0.968	1.8955e-07	4	RPL35
SEC62	1.83054e-11	0.750912	0.334	0.202	2.51041e-07	4	SEC62
GLTSCR21	2.09523e-11	0.348217	0.88	0.821	2.8734e-07	4	GLTSCR2
RCSD1	2.11234e-11	0.720038	0.329	0.199	2.89686e-07	4	RCSD1
RPL51	4.56688e-11	0.270906	0.983	0.966	6.26303e-07	4	RPL5
RPS3A1	1.16678e-10	0.271567	0.989	0.978	1.60012e-06	4	RPS3A
PNISR	1.83425e-10	0.693991	0.474	0.357	2.51549e-06	4	PNISR
RPL271	9.71724e-10	0.267666	0.974	0.953	1.33262e-05	4	RPL27
BLOC1S2	1.19419e-09	0.711976	0.257	0.146	1.63771e-05	4	BLOC1S2
TMEM243	2.97519e-09	0.642001	0.303	0.188	4.08018e-05	4	TMEM243
HMGN1	3.75516e-09	0.428069	0.614	0.511	5.14983e-05	4	HMGN1
POU2F21	5.24651e-09	0.560575	0.254	0.143	7.19507e-05	4	POU2F2
RNASEH2B	6.77459e-09	0.530501	0.26	0.151	9.29068e-05	4	RNASEH2B
CD692	1.16574e-08	0.653537	0.463	0.343	0.00015987	4	CD69
DRAM2	1.4296e-08	0.518731	0.251	0.148	0.000196056	4	DRAM2
RPSAP582	1.4934e-08	0.343602	0.811	0.717	0.000204805	4	RPSAP58
EIF4A22	4.68429e-08	0.3891	0.7	0.629	0.000642404	4	EIF4A2
TSC22D31	5.5952e-08	0.380093	0.786	0.743	0.000767325	4	TSC22D3
ZFP36L1	7.07829e-08	0.535178	0.329	0.228	0.000970717	4	ZFP36L1
SELL1	7.29882e-08	0.846958	0.566	0.454	0.00100096	4	SELL
CD531	6.37224e-07	0.539458	0.6	0.532	0.00873889	4	CD53
BTG11	6.70217e-07	0.310812	0.909	0.871	0.00919136	4	BTG1
ATP6V1G1	6.92801e-07	0.36629	0.649	0.6	0.00950107	4	ATP6V1G1
SP100	7.9623e-07	0.52184	0.354	0.257	0.0109195	4	SP100
DCK	2.17474e-06	0.611502	0.263	0.179	0.0298244	4	DCK
CCNI	3.88043e-06	0.405041	0.663	0.62	0.0532163	4	CCNI
EZR	4.08938e-06	0.618421	0.269	0.184	0.0560818	4	EZR
PAPOLA	4.54297e-06	0.631423	0.289	0.209	0.0623023	4	PAPOLA
PTPN6	7.38021e-06	0.525921	0.369	0.28	0.101212	4	PTPN6
ANAPC16	7.62584e-06	0.541105	0.529	0.472	0.104581	4	ANAPC16
HERPUD1	9.37912e-06	0.487316	0.283	0.201	0.128625	4	HERPUD1
SP110	1.30452e-05	0.47955	0.351	0.271	0.178902	4	SP110
UCP2	1.74097e-05	0.536916	0.586	0.551	0.238756	4	UCP2
FAM65B	3.96674e-05	0.50618	0.36	0.294	0.543998	4	FAM65B
ERP29	3.98403e-05	0.386666	0.589	0.554	0.54637	4	ERP29
CIRBP1	4.06868e-05	0.347455	0.72	0.7	0.557979	4	CIRBP
RASGRP2	4.56965e-05	0.944275	0.306	0.233	0.626682	4	RASGRP2
TXNIP	5.6431e-05	0.373657	0.763	0.753	0.773895	4	TXNIP
RPL231	6.00208e-05	0.300364	0.846	0.853	0.823126	4	RPL23
TAF7	8.24002e-05	0.544106	0.286	0.214	1	4	TAF7
RHOH2	0.000102467	0.39337	0.317	0.239	1	4	RHOH
NBEAL1	0.000142001	0.303696	0.683	0.678	1	4	NBEAL1
STK17A1	0.0001668	0.609194	0.369	0.307	1	4	STK17A
LSM7	0.0002903	0.37622	0.329	0.26	1	4	LSM7
TSTD11	0.000394311	0.497696	0.277	0.217	1	4	TSTD1
HNRNPA2B1	0.000401526	0.280005	0.643	0.63	1	4	HNRNPA2B1
LSM10	0.000441626	0.506772	0.266	0.203	1	4	LSM10
EVI2B	0.000667048	0.37092	0.369	0.317	1	4	EVI2B
EIF4G2	0.000904054	0.37825	0.354	0.302	1	4	EIF4G2
TCEA1	0.000992044	0.395242	0.271	0.213	1	4	TCEA1
HNRNPDL	0.00105661	0.457168	0.594	0.6	1	4	HNRNPDL
HMGB1	0.00119898	0.505365	0.64	0.63	1	4	HMGB1
2021-09-15	0.00183501	0.464246	0.329	0.289	1	4	2021-09-15
UQCRH	0.00286993	0.534588	0.483	0.448	1	4	UQCRH
HNRNPK1	0.00796903	0.313125	0.503	0.492	1	4	HNRNPK
RNASET21	0.00841218	0.336499	0.506	0.492	1	4	RNASET2
CDKN1C	3.98553e-231	1.69395	0.522	0.009	5.46575e-227	5	CDKN1C
HES4	9.91539e-228	1.84033	0.609	0.019	1.3598e-223	5	HES4
RP11-290F20.31	1.38834e-208	2.41172	0.851	0.067	1.90397e-204	5	RP11-290F20.3
FCGR3A	3.29898e-187	3.31084	0.981	0.134	4.52422e-183	5	FCGR3A
MS4A71	2.67269e-183	2.6969	0.801	0.073	3.66532e-179	5	MS4A7
CKB	1.82633e-179	1.39345	0.379	0.004	2.50463e-175	5	CKB
LILRA3	1.69423e-151	1.73392	0.54	0.03	2.32347e-147	5	LILRA3
IFITM31	2.44591e-147	2.71754	0.981	0.174	3.35433e-143	5	IFITM3
MS4A4A	1.80442e-144	1.29406	0.385	0.011	2.47459e-140	5	MS4A4A
LRRC251	1.97028e-136	1.87539	0.671	0.065	2.70204e-132	5	LRRC25
PILRA1	9.14594e-132	1.88774	0.708	0.078	1.25427e-127	5	PILRA
LILRB1	5.68476e-130	1.3673	0.509	0.033	7.79608e-126	5	LILRB1
CTSL	1.08604e-127	1.34093	0.472	0.028	1.4894e-123	5	CTSL
RHOC	4.51491e-126	2.28271	0.857	0.143	6.19175e-122	5	RHOC
HMOX1	1.27944e-125	1.69412	0.528	0.039	1.75462e-121	5	HMOX1
LST11	1.60184e-125	3.10255	1	0.314	2.19677e-121	5	LST1
SIGLEC10	2.34162e-123	1.41847	0.478	0.03	3.21129e-119	5	SIGLEC10
HCK1	3.06891e-123	1.97081	0.776	0.109	4.2087e-119	5	HCK
SERPINA11	1.37089e-122	2.30455	0.95	0.199	1.88004e-118	5	SERPINA1
CSF1R	5.90232e-122	1.48079	0.534	0.041	8.09444e-118	5	CSF1R
FCER1G1	1.77366e-119	2.73771	1	0.316	2.43239e-115	5	FCER1G
CD681	4.09935e-117	1.95031	0.925	0.174	5.62185e-113	5	CD68
CFD1	1.86971e-114	2.11636	0.944	0.183	2.56412e-110	5	CFD
AIF11	7.99449e-113	2.6764	0.994	0.334	1.09636e-108	5	AIF1
BATF3	2.59998e-112	1.06507	0.304	0.009	3.56561e-108	5	BATF3
IFI301	6.34331e-112	2.02758	0.795	0.123	8.69922e-108	5	IFI30
SPI11	1.0928e-111	2.0512	0.876	0.169	1.49867e-107	5	SPI1
LILRB2	1.23746e-106	1.54939	0.602	0.067	1.69706e-102	5	LILRB2
LILRA51	5.16796e-105	1.65354	0.665	0.084	7.08735e-101	5	LILRA5
TPPP3	1.68318e-98	1.17425	0.373	0.022	2.30831e-94	5	TPPP3
WARS1	6.95167e-97	1.73292	0.683	0.1	9.53352e-93	5	WARS
CXCL16	9.42987e-96	1.21227	0.398	0.028	1.29321e-91	5	CXCL16
STXBP21	9.41905e-95	1.99019	0.882	0.201	1.29173e-90	5	STXBP2
C5AR11	4.79162e-92	1.33385	0.571	0.068	6.57123e-88	5	C5AR1
COTL11	4.67475e-89	2.27568	1	0.602	6.41096e-85	5	COTL1
MAFB1	8.07327e-88	1.11523	0.559	0.067	1.10717e-83	5	MAFB
TESC	1.71521e-86	1.34441	0.491	0.054	2.35224e-82	5	TESC
CEBPB1	2.29848e-86	2.16464	0.919	0.285	3.15214e-82	5	CEBPB
SLC31A2	2.86366e-86	1.49089	0.522	0.06	3.92722e-82	5	SLC31A2
TIMP11	1.1082e-85	2.30797	0.913	0.288	1.51978e-81	5	TIMP1
C19orf381	7.79146e-83	1.27253	0.559	0.074	1.06852e-78	5	C19orf38
IFITM2	4.63933e-82	2.14403	1	0.685	6.36238e-78	5	IFITM2
PSAP1	9.86497e-82	1.93649	1	0.474	1.35288e-77	5	PSAP
CTD-2006K23.1	1.10179e-81	1.08398	0.286	0.015	1.51099e-77	5	CTD-2006K23.1
SAT11	1.30724e-81	2.15657	1	0.562	1.79275e-77	5	SAT1
BID1	6.11387e-80	1.67456	0.77	0.169	8.38456e-76	5	BID
CAMK1	8.5532e-80	1.18859	0.404	0.037	1.17299e-75	5	CAMK1
ABI3	1.17354e-79	1.81092	0.733	0.142	1.60939e-75	5	ABI3
LYN	9.49137e-78	1.43413	0.677	0.121	1.30165e-73	5	LYN
CTSS1	1.10993e-77	2.03723	1	0.486	1.52216e-73	5	CTSS
TCF7L2	1.35986e-77	0.84591	0.286	0.016	1.86492e-73	5	TCF7L2
FTH11	4.51343e-77	2.07293	1	0.987	6.18972e-73	5	FTH1
S100A111	4.89007e-76	1.90824	0.988	0.497	6.70625e-72	5	S100A11
CFP1	1.11883e-75	1.4918	0.795	0.17	1.53436e-71	5	CFP
BRI31	9.11403e-75	1.42585	0.776	0.167	1.2499e-70	5	BRI3
CST31	2.10467e-74	1.89119	1	0.36	2.88635e-70	5	CST3
TYMP1	4.60982e-74	1.56084	0.975	0.308	6.32191e-70	5	TYMP
NPC21	2.57556e-70	1.5685	0.975	0.38	3.53213e-66	5	NPC2
FTL1	6.79361e-70	2.0148	1	0.987	9.31675e-66	5	FTL
FAM110A	9.73745e-70	1.38719	0.441	0.054	1.33539e-65	5	FAM110A
TYROBP1	1.48024e-68	1.71265	1	0.359	2.03e-64	5	TYROBP
FGR1	3.4562e-68	1.48403	0.776	0.177	4.73984e-64	5	FGR
FGL21	1.77213e-67	1.06771	0.578	0.097	2.43029e-63	5	FGL2
FAM26F2	8.6224e-67	1.51819	0.776	0.191	1.18248e-62	5	FAM26F
APOBEC3A1	9.54327e-67	1.54055	0.565	0.096	1.30876e-62	5	APOBEC3A
NINJ11	6.39297e-66	1.38444	0.634	0.124	8.76731e-62	5	NINJ1
SLC7A71	2.83411e-65	1.22462	0.596	0.106	3.8867e-61	5	SLC7A7
PTP4A3	3.40612e-65	0.839841	0.323	0.028	4.67115e-61	5	PTP4A3
OAZ11	3.75202e-65	1.34315	1	0.902	5.14552e-61	5	OAZ1
UNC119	4.49908e-65	1.03475	0.509	0.076	6.17004e-61	5	UNC119
PLAUR1	4.09035e-64	1.0966	0.559	0.092	5.6095e-60	5	PLAUR
TNFRSF1B1	2.09593e-63	1.03583	0.609	0.111	2.87435e-59	5	TNFRSF1B
HSBP11	3.52562e-63	1.36339	0.634	0.131	4.83504e-59	5	HSBP1
AP2A1	9.01752e-63	0.924939	0.404	0.048	1.23666e-58	5	AP2A1
CD300LF	1.7929e-62	0.936416	0.366	0.04	2.45879e-58	5	CD300LF
EMR2	4.42002e-62	0.925073	0.286	0.023	6.06162e-58	5	EMR2
FCGR2A1	4.67135e-62	0.918544	0.447	0.061	6.40629e-58	5	FCGR2A
CDA1	1.18493e-61	1.07489	0.615	0.116	1.62502e-57	5	CDA
S100A41	5.8669e-61	1.48199	1	0.801	8.04586e-57	5	S100A4
CPPED11	4.55711e-60	1.24432	0.491	0.078	6.24962e-56	5	CPPED1
FAM49A	1.47926e-58	0.811524	0.323	0.033	2.02866e-54	5	FAM49A
LGALS11	1.98912e-58	1.52169	0.988	0.443	2.72788e-54	5	LGALS1
CUX1	3.81981e-57	0.96254	0.373	0.046	5.23848e-53	5	CUX1
GPBAR1	6.8012e-57	1.09191	0.366	0.045	9.32716e-53	5	GPBAR1
LYST	8.62081e-56	1.09091	0.534	0.097	1.18226e-51	5	LYST
ACTB1	2.56465e-55	0.996041	0.994	0.991	3.51716e-51	5	ACTB
ADA	7.93923e-55	1.14978	0.497	0.088	1.08879e-50	5	ADA
TBXAS11	1.61434e-54	1.18362	0.503	0.09	2.21391e-50	5	TBXAS1
MAPKAPK3	1.27606e-53	1.05199	0.516	0.093	1.74999e-49	5	MAPKAPK3
SLC11A11	4.17223e-53	0.98158	0.435	0.067	5.72179e-49	5	SLC11A1
NAAA1	1.29979e-52	1.18921	0.646	0.149	1.78253e-48	5	NAAA
ARPC31	1.82705e-52	1.16857	0.994	0.8	2.50561e-48	5	ARPC3
SLC2A6	1.34437e-50	0.845437	0.292	0.032	1.84367e-46	5	SLC2A6
CASP11	1.37497e-50	1.37324	0.764	0.239	1.88563e-46	5	CASP1
PYCARD1	1.77849e-50	1.53077	0.894	0.336	2.43902e-46	5	PYCARD
RHOB1	2.35247e-50	1.06325	0.528	0.103	3.22618e-46	5	RHOB
TMSB4X1	3.22977e-50	0.656946	1	1	4.42931e-46	5	TMSB4X
YBX11	4.80917e-50	1.04072	0.994	0.801	6.59529e-46	5	YBX1
ASAH11	1.09541e-49	1.53881	0.702	0.215	1.50224e-45	5	ASAH1
TKT1	3.20548e-49	1.32255	0.863	0.317	4.39599e-45	5	TKT
ADRBK1	5.49168e-49	0.961895	0.441	0.076	7.53129e-45	5	ADRBK1
VASP1	8.60231e-49	1.19875	0.776	0.241	1.17972e-44	5	VASP
CD300E	1.24145e-48	0.848625	0.335	0.044	1.70252e-44	5	CD300E
CD300C	4.69896e-48	0.707751	0.292	0.033	6.44415e-44	5	CD300C
FKBP1A1	1.44848e-47	1.35909	0.913	0.433	1.98644e-43	5	FKBP1A
S100A61	5.14888e-47	1.22618	0.988	0.768	7.06117e-43	5	S100A6
SLC16A3	5.63709e-47	0.937201	0.36	0.054	7.7307e-43	5	SLC16A3
TCIRG1	6.86414e-47	0.928205	0.441	0.078	9.41348e-43	5	TCIRG1
ANXA51	1.46433e-46	1.40947	0.789	0.274	2.00819e-42	5	ANXA5
CD86	3.54775e-46	0.907747	0.311	0.04	4.86538e-42	5	CD86
NEAT11	3.78422e-46	1.31583	0.969	0.616	5.18968e-42	5	NEAT1
CARD161	6.74502e-46	1.20544	0.783	0.255	9.25012e-42	5	CARD16
MPEG11	1.27391e-45	0.91255	0.46	0.086	1.74703e-41	5	MPEG1
HLA-DPA12	1.38668e-45	1.22318	0.975	0.46	1.9017e-41	5	HLA-DPA1
LY6E1	1.66854e-45	1.22386	0.963	0.645	2.28824e-41	5	LY6E
RXRA	1.90675e-45	1.21501	0.304	0.039	2.61491e-41	5	RXRA
UNC93B1	7.241e-45	0.838603	0.391	0.065	9.93031e-41	5	UNC93B1
RGS21	7.74378e-45	1.34237	0.77	0.245	1.06198e-40	5	RGS2
RHOG1	9.59747e-45	1.12102	0.894	0.358	1.3162e-40	5	RHOG
C10orf541	2.86329e-44	1.19725	0.857	0.34	3.92671e-40	5	C10orf54
STX111	9.1128e-44	0.905357	0.503	0.109	1.24973e-39	5	STX11
TNFSF101	1.16586e-43	1.40785	0.665	0.185	1.59886e-39	5	TNFSF10
BLVRA1	2.55368e-43	0.923031	0.609	0.157	3.50211e-39	5	BLVRA
ANXA21	8.48018e-43	1.18125	0.907	0.404	1.16297e-38	5	ANXA2
CYBB1	2.40946e-42	0.918081	0.441	0.085	3.30434e-38	5	CYBB
INSIG1	2.52184e-42	0.8712	0.342	0.052	3.45845e-38	5	INSIG1
ARRB21	3.32833e-42	1.08004	0.714	0.226	4.56447e-38	5	ARRB2
HN11	7.08635e-42	1.32302	0.696	0.214	9.71822e-38	5	HN1
LYL1	7.87642e-42	0.874045	0.466	0.094	1.08017e-37	5	LYL1
PRELID11	8.78639e-42	1.29581	0.919	0.437	1.20497e-37	5	PRELID1
NCF21	2.64579e-41	0.916235	0.59	0.147	3.62843e-37	5	NCF2
ARRB1	2.84997e-41	0.717075	0.255	0.03	3.90845e-37	5	ARRB1
SRGN1	2.99732e-41	1.11857	0.969	0.573	4.11053e-37	5	SRGN
CTSC1	4.60756e-41	1.32329	0.72	0.239	6.31881e-37	5	CTSC
OAZ21	5.95031e-41	1.06815	0.553	0.137	8.16025e-37	5	OAZ2
VMP1	6.54682e-41	1.01235	0.497	0.112	8.97831e-37	5	VMP1
MYL61	1.10091e-40	0.935995	1	0.84	1.50979e-36	5	MYL6
LILRA2	1.76246e-40	0.587924	0.255	0.03	2.41703e-36	5	LILRA2
CSTB1	2.74003e-40	1.40194	0.826	0.337	3.75767e-36	5	CSTB
PFN12	3.70875e-40	0.812303	0.994	0.939	5.08618e-36	5	PFN1
PRAM1	7.47118e-40	0.707687	0.329	0.051	1.0246e-35	5	PRAM1
SOD21	9.04214e-40	1.21976	0.609	0.175	1.24004e-35	5	SOD2
NAGA	1.81947e-39	0.716024	0.267	0.034	2.49522e-35	5	NAGA
ARHGEF40	2.22178e-39	0.834631	0.286	0.04	3.04695e-35	5	ARHGEF40
PTPN61	2.39849e-39	1.1657	0.745	0.263	3.28929e-35	5	PTPN6
POU2F22	6.67512e-39	1.19925	0.54	0.133	9.15426e-35	5	POU2F2
OAS11	7.35461e-39	1.01853	0.602	0.169	1.00861e-34	5	OAS1
SPN	2.13525e-38	0.885889	0.509	0.121	2.92828e-34	5	SPN
RELT	2.70628e-38	0.887458	0.267	0.036	3.7114e-34	5	RELT
TNFSF13B1	2.82395e-38	0.778168	0.547	0.136	3.87277e-34	5	TNFSF13B
MT2A1	8.7566e-38	1.39411	0.758	0.287	1.20088e-33	5	MT2A
ARPC1B1	6.1931e-37	0.902381	0.988	0.727	8.49321e-33	5	ARPC1B
NAMPT	7.36638e-37	0.849856	0.379	0.072	1.01023e-32	5	NAMPT
ARPC21	8.02122e-37	0.905853	0.981	0.785	1.10003e-32	5	ARPC2
DRAP1	8.6121e-37	1.16731	0.888	0.436	1.18106e-32	5	DRAP1
KLF41	1.00818e-36	0.864116	0.447	0.098	1.38262e-32	5	KLF4
SEC14L1	1.14367e-36	0.608746	0.28	0.04	1.56843e-32	5	SEC14L1
ATP1B3	7.8962e-36	1.09789	0.54	0.141	1.08289e-31	5	ATP1B3
SMCO41	2.47333e-35	0.820312	0.404	0.085	3.39192e-31	5	SMCO4
ISG151	2.67506e-35	1.08618	0.882	0.419	3.66858e-31	5	ISG15
FCN11	2.75839e-35	1.20342	0.727	0.266	3.78286e-31	5	FCN1
CLEC7A	4.37887e-35	0.813825	0.311	0.052	6.00518e-31	5	CLEC7A
GABARAP1	4.93953e-35	0.991265	0.925	0.459	6.77407e-31	5	GABARAP
CYBA1	6.09346e-35	0.909624	1	0.833	8.35657e-31	5	CYBA
BTK	6.17532e-35	0.723497	0.348	0.065	8.46883e-31	5	BTK
PAK1	7.84975e-35	0.567809	0.267	0.039	1.07651e-30	5	PAK1
HLA-DRB12	1.06061e-34	0.973284	0.944	0.427	1.45452e-30	5	HLA-DRB1
RNF1301	2.14301e-34	0.787683	0.565	0.153	2.93893e-30	5	RNF130
LILRB4	2.18943e-34	0.653199	0.261	0.038	3.00258e-30	5	LILRB4
LGALS91	5.96302e-34	1.06076	0.54	0.15	8.17768e-30	5	LGALS9
LGALS31	4.13168e-33	1.03029	0.671	0.218	5.66618e-29	5	LGALS3
RNASET22	5.94567e-33	1.04198	0.894	0.469	8.15389e-29	5	RNASET2
RNF135	6.28992e-33	0.547356	0.261	0.039	8.626e-29	5	RNF135
CHCHD10	6.59736e-33	0.906211	0.64	0.198	9.04762e-29	5	CHCHD10
DUSP6	6.73223e-33	0.752355	0.366	0.074	9.23258e-29	5	DUSP6
HLA-DRB52	9.1134e-33	0.851985	0.832	0.317	1.24981e-28	5	HLA-DRB5
PGLS1	1.10286e-32	0.98995	0.714	0.27	1.51247e-28	5	PGLS
NFKBIZ	1.20371e-32	0.902635	0.466	0.118	1.65076e-28	5	NFKBIZ
THEMIS21	3.28703e-32	0.866646	0.416	0.098	4.50783e-28	5	THEMIS2
BLOC1S11	3.30697e-32	1.02139	0.752	0.283	4.53518e-28	5	BLOC1S1
OSCAR	7.30454e-32	1.06888	0.261	0.041	1.00175e-27	5	OSCAR
ATG31	1.24031e-31	0.871627	0.602	0.187	1.70097e-27	5	ATG3
RNF13	1.43717e-31	0.760126	0.404	0.09	1.97093e-27	5	RNF13
CTSB1	5.49144e-31	0.729524	0.59	0.174	7.53097e-27	5	CTSB
SYNGR2	2.17478e-30	0.81447	0.453	0.115	2.98249e-26	5	SYNGR2
IFNGR21	2.20046e-30	0.735206	0.497	0.134	3.01771e-26	5	IFNGR2
AP2S11	2.75114e-30	1.1571	0.807	0.323	3.77292e-26	5	AP2S1
C1orf1621	3.77909e-30	1.10994	0.826	0.355	5.18265e-26	5	C1orf162
TPI11	4.189e-30	0.942501	0.901	0.479	5.74479e-26	5	TPI1
NUDT16	9.45028e-30	0.638128	0.317	0.062	1.29601e-25	5	NUDT16
ATP6V0B1	1.28092e-29	0.757819	0.783	0.309	1.75665e-25	5	ATP6V0B
CALM21	1.76998e-29	1.05717	0.882	0.515	2.42735e-25	5	CALM2
C20orf271	2.48541e-29	0.707884	0.429	0.109	3.40849e-25	5	C20orf27
HOTAIRM1	3.8128e-29	0.717078	0.273	0.049	5.22887e-25	5	HOTAIRM1
FCGRT1	4.22296e-29	0.566714	0.658	0.204	5.79137e-25	5	FCGRT
RBX11	7.96791e-29	0.797131	0.72	0.263	1.09272e-24	5	RBX1
RGS191	8.19721e-29	0.86661	0.677	0.242	1.12417e-24	5	RGS19
EMP31	9.94589e-29	0.859575	0.988	0.715	1.36398e-24	5	EMP3
RAB24	1.42611e-28	0.702619	0.354	0.078	1.95577e-24	5	RAB24
SCIMP	1.43778e-28	0.736527	0.317	0.065	1.97177e-24	5	SCIMP
CPVL1	1.55236e-28	0.64269	0.404	0.096	2.1289e-24	5	CPVL
MYD88	1.63121e-28	0.705167	0.435	0.111	2.23705e-24	5	MYD88
MPP1	2.52455e-28	0.782711	0.28	0.051	3.46217e-24	5	MPP1
RNF149	2.77781e-28	0.725007	0.46	0.122	3.80948e-24	5	RNF149
ZFAND51	6.6579e-28	0.880147	0.509	0.152	9.13065e-24	5	ZFAND5
MT-CO11	7.82392e-28	0.520963	0.994	0.995	1.07297e-23	5	MT-CO1
GNG51	1.54965e-27	0.847466	0.702	0.267	2.12519e-23	5	GNG5
PCGF5	2.05263e-27	0.659695	0.41	0.102	2.81497e-23	5	PCGF5
NANS	3.10596e-27	0.607611	0.398	0.097	4.25951e-23	5	NANS
RNH11	3.23859e-27	1.01724	0.714	0.279	4.44141e-23	5	RNH1
MTSS1	6.52573e-27	0.700896	0.323	0.069	8.94939e-23	5	MTSS1
ITGAL	1.01045e-26	0.609807	0.366	0.086	1.38574e-22	5	ITGAL
CNIH4	1.94852e-26	1.27365	0.311	0.066	2.6722e-22	5	CNIH4
RPS192	2.52003e-26	0.480016	1	0.993	3.45596e-22	5	RPS19
GRINA	4.6698e-26	0.679162	0.354	0.085	6.40417e-22	5	GRINA
AGPAT2	4.87402e-26	0.677426	0.298	0.062	6.68424e-22	5	AGPAT2
RAC11	1.86791e-25	0.723657	0.857	0.409	2.56165e-21	5	RAC1
RAB10	5.55324e-25	0.653178	0.453	0.13	7.61571e-21	5	RAB10
SH3BP1	5.95322e-25	1.03259	0.366	0.091	8.16425e-21	5	SH3BP1
AP1S21	6.89696e-25	0.59305	0.72	0.27	9.45849e-21	5	AP1S2
CD300A	8.02371e-25	0.675338	0.404	0.108	1.10037e-20	5	CD300A
ITGB21	1.15637e-24	0.818346	0.863	0.443	1.58584e-20	5	ITGB2
CTSZ1	1.78814e-24	0.935948	0.373	0.096	2.45226e-20	5	CTSZ
ATP6V0D11	2.55514e-24	0.786716	0.497	0.154	3.50412e-20	5	ATP6V0D1
HLA-DRA2	3.93268e-24	0.34696	0.969	0.53	5.39327e-20	5	HLA-DRA
TGFBI1	4.65058e-24	0.617711	0.354	0.09	6.3778e-20	5	TGFBI
NAP1L11	5.37034e-24	0.801603	0.882	0.553	7.36488e-20	5	NAP1L1
AGTRAP1	6.47815e-24	0.671788	0.453	0.132	8.88414e-20	5	AGTRAP
MAP2K3	6.74558e-24	0.60039	0.435	0.122	9.25088e-20	5	MAP2K3
FAM46A	1.40187e-23	0.563054	0.261	0.053	1.92252e-19	5	FAM46A
NAPRT1	2.38958e-23	0.60985	0.391	0.107	3.27707e-19	5	NAPRT1
IGSF61	2.82748e-23	0.657448	0.354	0.092	3.87761e-19	5	IGSF6
PTP4A2	3.31286e-23	0.736647	0.602	0.215	4.54325e-19	5	PTP4A2
HLA-DPB12	3.86878e-23	0.420979	0.95	0.486	5.30564e-19	5	HLA-DPB1
IMPDH1	7.92601e-23	0.587149	0.304	0.071	1.08697e-18	5	IMPDH1
SNAP29	1.26593e-22	0.527429	0.304	0.071	1.7361e-18	5	SNAP29
MNDA1	1.47111e-22	0.724049	0.391	0.109	2.01747e-18	5	MNDA
IFIT1	2.28666e-22	0.413039	0.292	0.067	3.13593e-18	5	IFIT1
CAPNS1	2.42327e-22	0.604821	0.398	0.111	3.32327e-18	5	CAPNS1
DPEP2	3.23223e-22	0.62226	0.298	0.071	4.43268e-18	5	DPEP2
G0S2	1.01548e-21	1.02383	0.255	0.057	1.39263e-17	5	G0S2
H3F3A1	1.04145e-21	0.743927	0.783	0.357	1.42824e-17	5	H3F3A
CX3CR1	1.08163e-21	0.560068	0.28	0.064	1.48335e-17	5	CX3CR1
SH3BGRL31	1.90562e-21	0.585881	0.981	0.849	2.61336e-17	5	SH3BGRL3
FAM45A	2.81608e-21	0.620083	0.292	0.071	3.86197e-17	5	FAM45A
MYO1G	4.41587e-21	1.02741	0.571	0.212	6.05592e-17	5	MYO1G
UTRN	4.80856e-21	0.850419	0.298	0.073	6.59446e-17	5	UTRN
EIF4E21	4.82263e-21	1.00579	0.435	0.138	6.61375e-17	5	EIF4E2
C11orf21	7.09786e-21	0.586748	0.255	0.056	9.73401e-17	5	C11orf21
SH3BGRL1	9.33187e-21	1.02418	0.795	0.417	1.27977e-16	5	SH3BGRL
TUBA1B	1.47832e-20	0.963897	0.776	0.406	2.02736e-16	5	TUBA1B
SUPT4H11	1.63292e-20	0.742836	0.652	0.265	2.23938e-16	5	SUPT4H1
CAPZA2	1.73732e-20	0.543684	0.534	0.189	2.38257e-16	5	CAPZA2
RAB8A	1.80478e-20	0.682453	0.54	0.195	2.47507e-16	5	RAB8A
ODF3B1	1.90438e-20	0.612586	0.366	0.104	2.61166e-16	5	ODF3B
GSTO11	2.9144e-20	0.683561	0.64	0.267	3.99681e-16	5	GSTO1
MSN1	3.2959e-20	0.643836	0.658	0.26	4.51999e-16	5	MSN
RAB321	3.94594e-20	0.416953	0.292	0.072	5.41146e-16	5	RAB32
ALOX5	4.12575e-20	0.514255	0.292	0.072	5.65805e-16	5	ALOX5
ZNF7061	7.51312e-20	0.75478	0.677	0.289	1.03035e-15	5	ZNF706
POLE41	8.64737e-20	0.804399	0.503	0.171	1.1859e-15	5	POLE4
ANXA4	1.17432e-19	0.675312	0.317	0.087	1.61047e-15	5	ANXA4
UBE2F	1.5851e-19	0.492027	0.391	0.116	2.1738e-15	5	UBE2F
GMFG1	2.05792e-19	0.587735	0.919	0.683	2.82223e-15	5	GMFG
CD83	2.23812e-19	0.530166	0.261	0.062	3.06936e-15	5	CD83
TSPO1	2.45677e-19	0.592401	0.876	0.449	3.36922e-15	5	TSPO
POLD41	2.97613e-19	0.726365	0.708	0.322	4.08147e-15	5	POLD4
RHOA1	3.02826e-19	0.666103	0.882	0.541	4.15295e-15	5	RHOA
SELPLG	3.18531e-19	0.617974	0.472	0.16	4.36833e-15	5	SELPLG
NAGK1	3.25932e-19	0.559116	0.366	0.108	4.46983e-15	5	NAGK
SERP11	3.50558e-19	0.658766	0.87	0.53	4.80755e-15	5	SERP1
ZYX1	3.76207e-19	0.533829	0.416	0.132	5.1593e-15	5	ZYX
C4orf481	4.11017e-19	0.655273	0.435	0.143	5.63669e-15	5	C4orf48
RNPEP	5.79806e-19	0.6457	0.298	0.079	7.95146e-15	5	RNPEP
EFHD21	5.83178e-19	0.810139	0.497	0.174	7.9977e-15	5	EFHD2
IFI61	8.74797e-19	0.507023	0.783	0.377	1.1997e-14	5	IFI6
ALDOA1	1.02273e-18	0.668672	0.932	0.685	1.40257e-14	5	ALDOA
ACAA1	1.08432e-18	0.946971	0.391	0.123	1.48704e-14	5	ACAA1
NACA1	1.11408e-18	0.581068	0.994	0.967	1.52785e-14	5	NACA
LSM6	1.88214e-18	1.03936	0.435	0.148	2.58116e-14	5	LSM6
RIN3	1.97081e-18	0.476184	0.311	0.084	2.70277e-14	5	RIN3
H2AFZ	2.02475e-18	0.565061	0.789	0.389	2.77674e-14	5	H2AFZ
COX171	2.58487e-18	0.528793	0.497	0.172	3.5449e-14	5	COX17
CFL1	3.06197e-18	0.452807	0.988	0.906	4.19919e-14	5	CFL1
FPR11	5.47458e-18	0.779256	0.323	0.093	7.50784e-14	5	FPR1
LINC009361	7.59716e-18	0.612967	0.609	0.256	1.04187e-13	5	LINC00936
CCT5	7.62485e-18	0.626182	0.466	0.167	1.04567e-13	5	CCT5
MTHFD2	1.36103e-17	0.51392	0.255	0.064	1.86652e-13	5	MTHFD2
MARCKSL1	1.95328e-17	0.625168	0.453	0.165	2.67873e-13	5	MARCKSL1
CAT	2.87393e-17	0.602112	0.379	0.125	3.94131e-13	5	CAT
SEC11A1	3.07873e-17	0.625003	0.677	0.306	4.22217e-13	5	SEC11A
CHMP4B1	3.21903e-17	0.61548	0.441	0.158	4.41457e-13	5	CHMP4B
LAMTOR41	3.46476e-17	0.761002	0.845	0.5	4.75158e-13	5	LAMTOR4
COMMD9	3.57584e-17	0.503712	0.348	0.106	4.90391e-13	5	COMMD9
PPP1CA	3.63602e-17	0.79025	0.851	0.494	4.98643e-13	5	PPP1CA
CMTM6	3.7433e-17	0.590733	0.435	0.154	5.13356e-13	5	CMTM6
PLEK	4.11846e-17	0.42167	0.447	0.152	5.64805e-13	5	PLEK
PSMB31	4.46598e-17	0.660087	0.752	0.357	6.12465e-13	5	PSMB3
EPSTI11	5.2522e-17	0.824028	0.46	0.161	7.20287e-13	5	EPSTI1
RABGAP1L	6.03624e-17	0.557593	0.292	0.082	8.2781e-13	5	RABGAP1L
LRRFIP11	6.05879e-17	0.605164	0.708	0.333	8.30903e-13	5	LRRFIP1
PSME21	6.13816e-17	0.708273	0.857	0.532	8.41787e-13	5	PSME2
GNB21	8.68403e-17	0.643021	0.584	0.244	1.19093e-12	5	GNB2
FLNA1	1.36016e-16	0.414003	0.509	0.192	1.86533e-12	5	FLNA
SNX21	1.58034e-16	0.437013	0.522	0.192	2.16728e-12	5	SNX2
GNAI21	1.62838e-16	0.550706	0.528	0.21	2.23316e-12	5	GNAI2
RALB	1.81724e-16	0.456823	0.273	0.074	2.49217e-12	5	RALB
DOK22	1.82767e-16	0.522709	0.553	0.22	2.50646e-12	5	DOK2
CBR1	1.86497e-16	0.461089	0.342	0.104	2.55762e-12	5	CBR1
UQCRC11	2.08883e-16	0.479902	0.46	0.167	2.86463e-12	5	UQCRC1
GLUL1	2.26359e-16	0.552713	0.342	0.108	3.10429e-12	5	GLUL
IFIT3	2.28203e-16	0.505045	0.311	0.093	3.12958e-12	5	IFIT3
GLRX1	2.39645e-16	0.654473	0.708	0.351	3.28649e-12	5	GLRX
SNX5	3.24514e-16	0.891335	0.317	0.095	4.45038e-12	5	SNX5
IFI351	3.49634e-16	0.410005	0.453	0.163	4.79489e-12	5	IFI35
UBE2L61	3.61744e-16	0.512986	0.702	0.32	4.96096e-12	5	UBE2L6
NCKAP1L	3.63252e-16	0.540765	0.311	0.093	4.98164e-12	5	NCKAP1L
EIF4EBP11	4.76951e-16	0.645678	0.342	0.109	6.5409e-12	5	EIF4EBP1
BAX	5.28118e-16	0.729589	0.658	0.282	7.24261e-12	5	BAX
SCPEP11	5.63401e-16	0.536084	0.36	0.12	7.72648e-12	5	SCPEP1
ARPC5	5.9922e-16	0.803047	0.851	0.501	8.21771e-12	5	ARPC5
PGK1	6.1044e-16	0.865523	0.783	0.451	8.37157e-12	5	PGK1
GRN1	6.14259e-16	0.330384	0.559	0.22	8.42395e-12	5	GRN
MMP24-AS1	7.30786e-16	0.486603	0.342	0.108	1.0022e-11	5	MMP24-AS1
IRF7	8.36708e-16	0.446186	0.416	0.147	1.14746e-11	5	IRF7
LSP1	8.85971e-16	0.744469	0.857	0.522	1.21502e-11	5	LSP1
TCEB21	8.95642e-16	0.629012	0.801	0.468	1.22828e-11	5	TCEB2
COX8A1	1.12653e-15	0.667869	0.745	0.362	1.54492e-11	5	COX8A
CD55	1.15217e-15	0.837716	0.472	0.186	1.58008e-11	5	CD55
CAP1	1.34047e-15	0.476058	0.745	0.39	1.83833e-11	5	CAP1
SERF21	1.65764e-15	0.444609	0.981	0.847	2.27329e-11	5	SERF2
VMA21	1.75903e-15	0.481436	0.267	0.075	2.41233e-11	5	VMA21
COX5B1	1.96895e-15	0.741239	0.832	0.479	2.70022e-11	5	COX5B
ARRDC1	2.33517e-15	0.391648	0.304	0.091	3.20245e-11	5	ARRDC1
VPS29	2.37261e-15	0.753399	0.46	0.18	3.2538e-11	5	VPS29
PLEKHO1	2.77953e-15	0.446245	0.255	0.071	3.81185e-11	5	PLEKHO1
CAPZB1	2.88908e-15	0.521514	0.851	0.537	3.96208e-11	5	CAPZB
SNX10	2.92877e-15	0.348021	0.286	0.084	4.01651e-11	5	SNX10
SMS1	3.31546e-15	0.468677	0.416	0.151	4.54682e-11	5	SMS
H2AFY1	3.34197e-15	0.777372	0.615	0.275	4.58317e-11	5	H2AFY
MPC1	3.47671e-15	0.572036	0.391	0.14	4.76796e-11	5	MPC1
MYO1F2	4.11867e-15	0.559184	0.528	0.219	5.64835e-11	5	MYO1F
WSB1	4.5116e-15	0.561946	0.435	0.165	6.18721e-11	5	WSB1
TSPAN14	4.63659e-15	0.490228	0.317	0.099	6.35861e-11	5	TSPAN14
DYNLT11	5.59445e-15	0.407282	0.46	0.174	7.67223e-11	5	DYNLT1
SLC25A51	7.20723e-15	0.611636	0.814	0.484	9.88399e-11	5	SLC25A5
MOB1A	8.58456e-15	0.574558	0.453	0.18	1.17729e-10	5	MOB1A
TMEM179B	1.04917e-14	0.516221	0.404	0.146	1.43883e-10	5	TMEM179B
VAMP51	1.35977e-14	0.607687	0.491	0.206	1.86478e-10	5	VAMP5
LTA4H1	1.85677e-14	0.520127	0.404	0.147	2.54638e-10	5	LTA4H
CDKN2D	2.10328e-14	0.412826	0.497	0.203	2.88444e-10	5	CDKN2D
S100A102	2.18963e-14	0.548547	0.932	0.621	3.00285e-10	5	S100A10
ATP5B	2.38873e-14	0.598088	0.739	0.382	3.27591e-10	5	ATP5B
PSMB9	2.66819e-14	0.618546	0.876	0.562	3.65915e-10	5	PSMB9
TUBA1A	3.01448e-14	0.712477	0.77	0.44	4.13406e-10	5	TUBA1A
CSK	3.42377e-14	0.526637	0.497	0.203	4.69536e-10	5	CSK
HIGD2A1	4.25825e-14	0.722368	0.832	0.469	5.83976e-10	5	HIGD2A
ATOX11	5.63702e-14	0.449848	0.317	0.106	7.73061e-10	5	ATOX1
LYSMD2	5.81176e-14	0.612812	0.46	0.179	7.97025e-10	5	LYSMD2
RNF1811	7.18837e-14	0.47779	0.491	0.199	9.85813e-10	5	RNF181
APLP21	8.57737e-14	0.478709	0.404	0.15	1.1763e-09	5	APLP2
ENY21	9.58861e-14	0.489109	0.447	0.18	1.31498e-09	5	ENY2
SNAP23	1.00111e-13	0.449764	0.36	0.128	1.37293e-09	5	SNAP23
GBP2	1.36821e-13	0.521661	0.447	0.178	1.87636e-09	5	GBP2
AKIRIN2	1.47214e-13	0.359049	0.342	0.116	2.01889e-09	5	AKIRIN2
CTSH1	1.48715e-13	0.448951	0.422	0.161	2.03948e-09	5	CTSH
ARHGDIB	1.83986e-13	0.448611	0.988	0.903	2.52318e-09	5	ARHGDIB
GDI2	1.89357e-13	0.585463	0.602	0.284	2.59685e-09	5	GDI2
GNG2	1.93113e-13	0.416684	0.329	0.111	2.64836e-09	5	GNG2
TPM3	2.02153e-13	0.827107	0.789	0.453	2.77233e-09	5	TPM3
GLIPR11	2.38828e-13	0.476764	0.466	0.188	3.27528e-09	5	GLIPR1
PFKL	2.39945e-13	0.430387	0.292	0.094	3.29061e-09	5	PFKL
NUP2141	2.67799e-13	0.438017	0.36	0.131	3.67259e-09	5	NUP214
CTSD1	2.93427e-13	0.424723	0.528	0.223	4.02406e-09	5	CTSD
CLIC11	3.33893e-13	0.508054	0.913	0.624	4.57901e-09	5	CLIC1
SCO21	3.4549e-13	0.535044	0.335	0.12	4.73805e-09	5	SCO2
POMP	3.65647e-13	0.417023	0.385	0.143	5.01448e-09	5	POMP
REEP51	4.01716e-13	0.824364	0.54	0.243	5.50914e-09	5	REEP5
SNX32	4.65024e-13	0.405899	0.807	0.44	6.37734e-09	5	SNX3
M6PR	5.27418e-13	0.666656	0.472	0.205	7.23301e-09	5	M6PR
GNAI3	5.9446e-13	0.452713	0.354	0.13	8.15243e-09	5	GNAI3
ATP2B1	8.03304e-13	0.450716	0.273	0.088	1.10165e-08	5	ATP2B1
CECR11	8.27976e-13	0.349837	0.292	0.095	1.13549e-08	5	CECR1
PTPN18	8.46102e-13	0.462775	0.348	0.128	1.16034e-08	5	PTPN18
SDCBP1	8.50763e-13	0.533965	0.509	0.227	1.16674e-08	5	SDCBP
TREX1	1.07209e-12	0.352776	0.317	0.109	1.47026e-08	5	TREX1
LAMTOR21	1.0793e-12	0.451785	0.484	0.206	1.48015e-08	5	LAMTOR2
ARPC1A	1.2402e-12	0.528499	0.323	0.11	1.70081e-08	5	ARPC1A
NOP101	1.3638e-12	0.77705	0.553	0.278	1.87032e-08	5	NOP10
CYTIP1	1.46593e-12	0.420939	0.652	0.319	2.01037e-08	5	CYTIP
SH3GLB1	1.5723e-12	0.405572	0.348	0.127	2.15625e-08	5	SH3GLB1
COX6B11	1.6578e-12	0.507385	0.857	0.551	2.27351e-08	5	COX6B1
ACTR2	1.6899e-12	0.376818	0.441	0.177	2.31753e-08	5	ACTR2
RTN3	1.83671e-12	0.427835	0.323	0.114	2.51886e-08	5	RTN3
WAS	1.94395e-12	0.4156	0.478	0.201	2.66593e-08	5	WAS
C20orf241	2.81196e-12	0.418723	0.621	0.287	3.85632e-08	5	C20orf24
EIF4A11	3.28792e-12	0.401078	0.919	0.663	4.50905e-08	5	EIF4A1
BRK11	3.35654e-12	0.573131	0.845	0.529	4.60316e-08	5	BRK1
CD971	4.44535e-12	0.604933	0.478	0.208	6.09636e-08	5	CD97
PSMA4	4.74011e-12	0.413138	0.348	0.13	6.50058e-08	5	PSMA4
EVI2B1	7.18741e-12	0.447253	0.627	0.305	9.85681e-08	5	EVI2B
TGFB11	7.53201e-12	0.392783	0.441	0.185	1.03294e-07	5	TGFB1
KLF3	7.78647e-12	0.413657	0.28	0.095	1.06784e-07	5	KLF3
SLC25A61	9.52503e-12	0.403472	0.969	0.819	1.30626e-07	5	SLC25A6
FMNL1	1.04161e-11	0.422628	0.478	0.208	1.42846e-07	5	FMNL1
COX5A1	1.07943e-11	0.389882	0.646	0.331	1.48034e-07	5	COX5A
DBNL	1.42719e-11	0.40322	0.509	0.223	1.95724e-07	5	DBNL
GNB1	1.55229e-11	0.410768	0.298	0.106	2.12881e-07	5	GNB1
IDH2	1.85809e-11	0.937609	0.404	0.169	2.54818e-07	5	IDH2
POLR3K	1.85816e-11	0.389197	0.28	0.098	2.54828e-07	5	POLR3K
LAMTOR51	2.13024e-11	0.376959	0.559	0.261	2.92141e-07	5	LAMTOR5
CEBPD1	2.19352e-11	0.256338	0.484	0.206	3.0082e-07	5	CEBPD
RTN4	2.31587e-11	0.949963	0.484	0.224	3.17598e-07	5	RTN4
PARVG1	2.81334e-11	0.382926	0.36	0.139	3.85821e-07	5	PARVG
LAPTM4A	3.18831e-11	0.541875	0.453	0.207	4.37245e-07	5	LAPTM4A
PRDX51	3.56328e-11	0.365337	0.671	0.333	4.88668e-07	5	PRDX5
HCLS1	3.6112e-11	0.565476	0.683	0.364	4.9524e-07	5	HCLS1
RILPL21	5.36538e-11	0.279676	0.422	0.174	7.35808e-07	5	RILPL2
NDUFA131	5.68621e-11	0.58341	0.727	0.442	7.79807e-07	5	NDUFA13
ETFA	5.81392e-11	0.337956	0.323	0.121	7.97321e-07	5	ETFA
CNPY31	8.79533e-11	0.33366	0.553	0.26	1.20619e-06	5	CNPY3
SLIRP	8.79624e-11	0.322458	0.292	0.105	1.20632e-06	5	SLIRP
ARL6IP41	1.00766e-10	0.443697	0.814	0.478	1.38191e-06	5	ARL6IP4
MLX	1.03531e-10	0.516	0.292	0.107	1.41982e-06	5	MLX
PLIN2	1.24762e-10	0.347482	0.28	0.1	1.71099e-06	5	PLIN2
IL10RB	1.27616e-10	0.323723	0.273	0.097	1.75012e-06	5	IL10RB
SPG211	1.28176e-10	0.424211	0.385	0.162	1.7578e-06	5	SPG21
MTHFS	1.37394e-10	0.299944	0.304	0.113	1.88422e-06	5	MTHFS
SHKBP1	1.39049e-10	0.439645	0.366	0.152	1.90692e-06	5	SHKBP1
UBE2J1	1.51968e-10	0.37051	0.28	0.103	2.08408e-06	5	UBE2J1
PRDX1	1.60141e-10	0.754176	0.571	0.288	2.19617e-06	5	PRDX1
ATP1A1	1.60739e-10	0.629976	0.416	0.18	2.20437e-06	5	ATP1A1
WASF21	1.65102e-10	0.34366	0.429	0.18	2.26421e-06	5	WASF2
ATP5J21	1.73928e-10	0.42392	0.621	0.307	2.38525e-06	5	ATP5J2
C7orf50	2.37977e-10	0.350586	0.366	0.147	3.26361e-06	5	C7orf50
PKN1	2.56602e-10	0.410452	0.292	0.11	3.51904e-06	5	PKN1
PMVK	2.69681e-10	0.659208	0.335	0.133	3.69841e-06	5	PMVK
PPDPF	2.73958e-10	0.402781	0.95	0.797	3.75705e-06	5	PPDPF
TMEM134	2.76499e-10	0.337979	0.304	0.115	3.79191e-06	5	TMEM134
DEDD2	2.99742e-10	0.391571	0.292	0.111	4.11067e-06	5	DEDD2
CTNNBL1	3.20922e-10	0.253245	0.261	0.092	4.40112e-06	5	CTNNBL1
VDAC1	3.43641e-10	0.467161	0.435	0.199	4.71269e-06	5	VDAC1
PRR13	3.53344e-10	0.451776	0.758	0.463	4.84576e-06	5	PRR13
PLSCR11	3.6928e-10	0.49678	0.323	0.128	5.06431e-06	5	PLSCR1
CD48	4.14021e-10	0.313522	0.938	0.678	5.67789e-06	5	CD48
GCA1	4.21048e-10	0.901229	0.304	0.119	5.77426e-06	5	GCA
CLTA1	4.38921e-10	0.435363	0.559	0.272	6.01937e-06	5	CLTA
CORO1A	5.54752e-10	0.42315	0.981	0.788	7.60787e-06	5	CORO1A
C7orf73	6.45267e-10	0.36499	0.391	0.169	8.84919e-06	5	C7orf73
PPT11	7.22548e-10	0.574139	0.404	0.178	9.90903e-06	5	PPT1
ATP6V1F1	7.67066e-10	0.325773	0.671	0.352	1.05195e-05	5	ATP6V1F
EIF6	8.25831e-10	0.36326	0.46	0.211	1.13254e-05	5	EIF6
RAP1B1	8.59166e-10	0.410119	0.64	0.344	1.17826e-05	5	RAP1B
MRPL27	9.82883e-10	0.350577	0.255	0.093	1.34793e-05	5	MRPL27
PSMC3	1.10821e-09	0.301245	0.385	0.161	1.5198e-05	5	PSMC3
RER1	1.34895e-09	0.302884	0.453	0.211	1.84995e-05	5	RER1
RAB5C	1.55655e-09	0.556366	0.534	0.263	2.13465e-05	5	RAB5C
C11orf311	1.71531e-09	0.342981	0.77	0.424	2.35238e-05	5	C11orf31
NDUFB5	1.93664e-09	0.735242	0.429	0.199	2.65591e-05	5	NDUFB5
ATP5C1	2.05745e-09	0.406469	0.578	0.29	2.82158e-05	5	ATP5C1
PGAM11	2.17574e-09	0.370722	0.478	0.22	2.98381e-05	5	PGAM1
MTPN	2.25226e-09	0.397844	0.298	0.119	3.08876e-05	5	MTPN
WDR1	2.34505e-09	0.51403	0.503	0.245	3.216e-05	5	WDR1
LSM101	2.47651e-09	0.335254	0.435	0.197	3.39628e-05	5	LSM10
ERICH1	2.53798e-09	0.416684	0.273	0.104	3.48059e-05	5	ERICH1
TNFRSF14	2.68279e-09	0.353832	0.447	0.204	3.67917e-05	5	TNFRSF14
ERP44	3.06876e-09	0.390995	0.373	0.163	4.2085e-05	5	ERP44
MRPL231	3.15843e-09	0.368121	0.553	0.271	4.33147e-05	5	MRPL23
CASP41	3.31907e-09	0.333646	0.571	0.299	4.55178e-05	5	CASP4
EMC7	3.44392e-09	0.292851	0.379	0.164	4.72299e-05	5	EMC7
RAB18	3.66315e-09	0.377986	0.286	0.114	5.02364e-05	5	RAB18
MIDN	4.54125e-09	0.481347	0.255	0.098	6.22787e-05	5	MIDN
IDH3G1	4.60991e-09	0.261311	0.416	0.186	6.32203e-05	5	IDH3G
SRI	4.6492e-09	0.474881	0.497	0.251	6.37592e-05	5	SRI
SERPINB61	5.58218e-09	0.374546	0.398	0.179	7.6554e-05	5	SERPINB6
CCDC12	5.59862e-09	1.18422	0.484	0.233	7.67795e-05	5	CCDC12
SP1101	6.10241e-09	0.40225	0.547	0.264	8.36885e-05	5	SP110
MRPL18	7.52353e-09	0.60813	0.404	0.181	0.000103178	5	MRPL18
STX101	7.86417e-09	0.341884	0.323	0.135	0.000107849	5	STX10
ZFAND6	9.30858e-09	0.256807	0.354	0.152	0.000127658	5	ZFAND6
UQCRFS11	1.00048e-08	0.331577	0.547	0.269	0.000137205	5	UQCRFS1
SLC25A3	1.02393e-08	0.411316	0.814	0.502	0.000140422	5	SLC25A3
ZNHIT3	1.07005e-08	0.669586	0.36	0.16	0.000146747	5	ZNHIT3
NDUFB3	1.1572e-08	0.269441	0.311	0.13	0.000158698	5	NDUFB3
MSRB11	1.16343e-08	0.306462	0.255	0.098	0.000159552	5	MSRB1
TIMM8B	1.20102e-08	0.413252	0.261	0.102	0.000164707	5	TIMM8B
SAMHD11	1.25675e-08	0.342369	0.472	0.227	0.000172351	5	SAMHD1
MX2	1.26371e-08	0.310019	0.261	0.102	0.000173305	5	MX2
AOAH	1.31477e-08	0.322516	0.286	0.115	0.000180307	5	AOAH
CHCHD2	1.4017e-08	0.385726	0.925	0.693	0.000192229	5	CHCHD2
TXN2	1.41822e-08	0.346572	0.342	0.152	0.000194494	5	TXN2
ICAM2	1.48024e-08	0.427197	0.466	0.225	0.000203001	5	ICAM2
NMI	1.63993e-08	0.355414	0.36	0.162	0.0002249	5	NMI
PSMA71	1.74095e-08	0.407181	0.851	0.541	0.000238753	5	PSMA7
UBE2A	1.78174e-08	0.293138	0.28	0.113	0.000244348	5	UBE2A
CD4	1.96879e-08	0.303421	0.267	0.107	0.000269999	5	CD4
1991-09-01	2.11108e-08	0.428741	0.584	0.321	0.000289513	5	2021-09-09
SFT2D1	2.14524e-08	0.351482	0.317	0.137	0.000294198	5	SFT2D1
YWHAH	2.17418e-08	0.402026	0.385	0.186	0.000298167	5	YWHAH
EIF11	2.18434e-08	0.25728	0.994	0.981	0.00029956	5	EIF1
COX6A1	2.21213e-08	0.35818	0.745	0.459	0.000303372	5	COX6A1
ARHGAP4	2.31649e-08	0.287897	0.286	0.114	0.000317683	5	ARHGAP4
ADI1	2.37256e-08	0.302713	0.335	0.147	0.000325373	5	ADI1
STX71	2.37769e-08	0.491967	0.28	0.113	0.000326077	5	STX7
PRKCB1	2.42914e-08	0.723935	0.304	0.129	0.000333132	5	PRKCB
YWHAE	2.78773e-08	0.414693	0.311	0.132	0.000382309	5	YWHAE
UPP1	2.83338e-08	0.361752	0.317	0.136	0.00038857	5	UPP1
SELK	2.84989e-08	0.27856	0.547	0.275	0.000390834	5	SELK
WDR83OS1	3.23057e-08	0.336999	0.609	0.329	0.00044304	5	WDR83OS
HERPUD11	3.38405e-08	0.310965	0.416	0.199	0.000464088	5	HERPUD1
MT-CO2	3.43468e-08	0.622987	0.975	0.907	0.000471032	5	MT-CO2
SSR31	3.93148e-08	0.433733	0.366	0.17	0.000539163	5	SSR3
LCP11	4.36705e-08	0.490837	0.64	0.369	0.000598897	5	LCP1
ATP5G31	4.51364e-08	0.467427	0.708	0.411	0.000619001	5	ATP5G3
ATP5EP21	4.69694e-08	0.394442	0.516	0.265	0.000644138	5	ATP5EP2
FAM49B	4.88329e-08	0.264436	0.547	0.286	0.000669695	5	FAM49B
UBE2B	5.18018e-08	0.686666	0.323	0.139	0.00071041	5	UBE2B
CRIP12	5.30979e-08	0.374183	0.615	0.352	0.000728184	5	CRIP1
ATP5E1	5.36596e-08	0.375841	0.944	0.737	0.000735888	5	ATP5E
LRPAP1	6.02492e-08	0.329555	0.36	0.168	0.000826258	5	LRPAP1
FAM32A	6.54931e-08	0.302353	0.298	0.132	0.000898172	5	FAM32A
C1orf431	8.90956e-08	0.452456	0.429	0.214	0.00122186	5	C1orf43
ABRACL	1.05814e-07	0.463458	0.503	0.266	0.00145113	5	ABRACL
CYTH4	1.1483e-07	0.559467	0.28	0.121	0.00157478	5	CYTH4
TMC6	1.51148e-07	0.255554	0.292	0.126	0.00207284	5	TMC6
NDUFB71	1.5301e-07	0.264546	0.54	0.27	0.00209837	5	NDUFB7
PPCS	1.53243e-07	0.300311	0.379	0.178	0.00210158	5	PPCS
RP11-347P5.1	1.5737e-07	0.32986	0.28	0.121	0.00215817	5	RP11-347P5.1
COX6A1P2	1.59336e-07	0.348101	0.373	0.177	0.00218513	5	COX6A1P2
SYTL1	1.65017e-07	0.346289	0.342	0.158	0.00226305	5	SYTL1
DYNLL11	1.71302e-07	0.270937	0.578	0.323	0.00234924	5	DYNLL1
FIBP1	1.7219e-07	0.335053	0.342	0.161	0.00236142	5	FIBP
PPP4C1	1.73188e-07	0.328398	0.528	0.275	0.00237509	5	PPP4C
NDUFS61	1.81076e-07	0.309246	0.435	0.216	0.00248328	5	NDUFS6
BST21	1.83018e-07	0.388829	0.745	0.427	0.00250991	5	BST2
PSMD4	1.92065e-07	0.410553	0.522	0.269	0.00263398	5	PSMD4
UQCR101	2.16421e-07	0.290072	0.602	0.33	0.002968	5	UQCR10
TBCB	2.21842e-07	0.481915	0.54	0.29	0.00304234	5	TBCB
PDCL3	2.41394e-07	0.285279	0.267	0.114	0.00331048	5	PDCL3
RNF213	2.6029e-07	0.533462	0.429	0.213	0.00356962	5	RNF213
CALM3	2.95445e-07	0.522117	0.609	0.345	0.00405173	5	CALM3
NDUFB6	3.51402e-07	0.618664	0.28	0.122	0.00481913	5	NDUFB6
LAP31	4.48894e-07	0.299329	0.311	0.144	0.00615613	5	LAP3
GLUD1	5.46546e-07	0.46263	0.273	0.12	0.00749533	5	GLUD1
AMICA11	5.53745e-07	0.300747	0.472	0.249	0.00759405	5	AMICA1
ARF51	5.93969e-07	0.391396	0.516	0.284	0.00814569	5	ARF5
NDUFC1	6.31414e-07	0.256381	0.273	0.121	0.00865922	5	NDUFC1
PSENEN	6.37785e-07	0.254849	0.292	0.131	0.00874659	5	PSENEN
NDUFA121	7.08139e-07	0.274023	0.41	0.207	0.00971142	5	NDUFA12
LSMD11	7.24451e-07	0.398839	0.348	0.164	0.00993512	5	LSMD1
MKRN1	8.83955e-07	0.328767	0.385	0.197	0.0121226	5	MKRN1
ADAR	1.02605e-06	0.548415	0.342	0.169	0.0140713	5	ADAR
ZNHIT11	1.07155e-06	0.257807	0.491	0.26	0.0146952	5	ZNHIT1
RAB2A	1.15069e-06	0.396449	0.329	0.158	0.0157805	5	RAB2A
OSTF1	1.15457e-06	0.45756	0.516	0.295	0.0158337	5	OSTF1
NDUFA4	1.31199e-06	0.300244	0.745	0.508	0.0179926	5	NDUFA4
CD44	1.44944e-06	0.262168	0.702	0.445	0.0198776	5	CD44
COMT1	1.46735e-06	0.348517	0.311	0.146	0.0201232	5	COMT
ICAM3	1.64841e-06	0.330443	0.671	0.401	0.0226062	5	ICAM3
TWF2	2.11701e-06	0.25203	0.348	0.172	0.0290327	5	TWF2
COX7A21	2.23487e-06	0.350723	0.64	0.384	0.030649	5	COX7A2
ENO1	2.27383e-06	0.356581	0.789	0.546	0.0311833	5	ENO1
NDUFS71	2.3109e-06	0.392461	0.497	0.276	0.0316917	5	NDUFS7
MIEN1	2.33581e-06	0.266379	0.348	0.17	0.0320333	5	MIEN1
CHMP3	2.3462e-06	0.259551	0.335	0.161	0.0321758	5	CHMP3
PSMC4	3.13325e-06	0.42499	0.329	0.157	0.0429695	5	PSMC4
NDUFV2	3.91018e-06	0.270776	0.491	0.266	0.0536242	5	NDUFV2
CHMP2A1	4.09639e-06	0.317322	0.453	0.25	0.0561779	5	CHMP2A
ZFP361	4.59812e-06	0.321656	0.863	0.69	0.0630586	5	ZFP36
GNAS1	4.61212e-06	0.270469	0.509	0.285	0.0632506	5	GNAS
TCF25	4.73088e-06	0.430333	0.441	0.24	0.0648792	5	TCF25
SELT	6.17002e-06	0.293963	0.528	0.285	0.0846157	5	SELT
ATP6V0E1	6.68926e-06	0.334897	0.832	0.544	0.0917365	5	ATP6V0E1
SAP18	6.79935e-06	0.293727	0.739	0.46	0.0932463	5	SAP18
AHNAK1	9.41803e-06	0.361582	0.478	0.261	0.129159	5	AHNAK
PTGES31	1.00217e-05	0.322495	0.59	0.393	0.137437	5	PTGES3
PSMB2	1.17688e-05	0.275869	0.385	0.205	0.161397	5	PSMB2
SSNA1	1.20428e-05	0.254501	0.398	0.212	0.165155	5	SSNA1
SNRPD3	1.28547e-05	0.268728	0.329	0.167	0.176289	5	SNRPD3
ATP6AP2	1.51326e-05	0.284706	0.435	0.24	0.207529	5	ATP6AP2
NAPA	1.53129e-05	0.25354	0.255	0.122	0.210001	5	NAPA
CHMP1B1	2.70985e-05	0.411939	0.453	0.246	0.371628	5	CHMP1B
RBCK1	2.92213e-05	0.383109	0.373	0.198	0.40074	5	RBCK1
ARL4A	3.1275e-05	0.256953	0.28	0.145	0.428905	5	ARL4A
DCTN3	3.64859e-05	0.451017	0.41	0.222	0.500368	5	DCTN3
LCP2	3.89779e-05	0.278513	0.261	0.126	0.534543	5	LCP2
GRK6	4.39426e-05	0.283437	0.335	0.178	0.602629	5	GRK6
RALY1	4.7275e-05	0.402432	0.404	0.215	0.64833	5	RALY
ATRAID	5.27903e-05	0.343935	0.466	0.262	0.723966	5	ATRAID
UBC1	5.94979e-05	0.283422	0.957	0.842	0.815954	5	UBC
GPX41	6.0567e-05	0.288467	0.745	0.527	0.830615	5	GPX4
SNX17	6.59492e-05	0.48328	0.379	0.208	0.904427	5	SNX17
C19orf70	0.000137999	0.274696	0.366	0.211	1	5	C19orf70
UBXN1	0.000178917	0.38287	0.764	0.49	1	5	UBXN1
MYL12B2	0.000355861	0.345818	0.894	0.684	1	5	MYL12B
COPE1	0.000469484	0.337009	0.665	0.419	1	5	COPE
APBB1IP	0.000666854	0.280228	0.28	0.154	1	5	APBB1IP
CCT7	0.000733539	0.416014	0.317	0.185	1	5	CCT7
SMIM7	0.000769663	0.599939	0.28	0.155	1	5	SMIM7
LDHA1	0.000911603	0.305079	0.708	0.477	1	5	LDHA
NDUFA111	0.00105152	0.286987	0.621	0.395	1	5	NDUFA11
YPEL5	0.00148767	0.455654	0.516	0.323	1	5	YPEL5
COPS6	0.00244462	0.297415	0.311	0.183	1	5	COPS6
SOD12	0.00244701	0.334655	0.671	0.499	1	5	SOD1
SIVA1	0.00274556	0.451703	0.354	0.213	1	5	SIVA1
C1orf63	0.00316124	0.45128	0.298	0.174	1	5	C1orf63
GZMB	1.11034e-266	4.81544	0.961	0.07	1.52272e-262	6	GZMB
FGFBP2	1.22444e-245	4.04207	0.896	0.062	1.67919e-241	6	FGFBP2
SPON2	7.64573e-220	3.26525	0.734	0.04	1.04854e-215	6	SPON2
PRF11	1.26082e-202	3.91314	0.955	0.11	1.72909e-198	6	PRF1
AKR1C3	1.60486e-182	2.34585	0.474	0.013	2.2009e-178	6	AKR1C3
GNLY1	1.56297e-179	5.04267	0.942	0.133	2.14346e-175	6	GNLY
CLIC3	1.89419e-167	2.72414	0.571	0.031	2.59769e-163	6	CLIC3
XCL2	4.82642e-153	2.33245	0.5	0.024	6.61895e-149	6	XCL2
KLRD1	1.17093e-149	2.23271	0.532	0.03	1.60582e-145	6	KLRD1
GZMA1	1.79379e-148	3.11255	0.935	0.156	2.46001e-144	6	GZMA
CST71	8.40141e-147	3.19948	0.935	0.154	1.15217e-142	6	CST7
TTC38	5.58827e-138	2.09525	0.461	0.023	7.66376e-134	6	TTC38
CCL41	3.08593e-133	3.55895	0.701	0.078	4.23204e-129	6	CCL4
NKG71	4.73349e-132	3.95349	0.987	0.261	6.49151e-128	6	NKG7
PRSS23	4.71782e-130	1.82474	0.396	0.016	6.47002e-126	6	PRSS23
CTSW1	4.30544e-114	2.80767	0.968	0.259	5.90448e-110	6	CTSW
FCGR3A1	4.19909e-113	2.26993	0.844	0.144	5.75864e-109	6	FCGR3A
GZMH1	3.60432e-112	2.31305	0.63	0.068	4.94296e-108	6	GZMH
IGFBP7	9.34982e-110	2.90323	0.545	0.057	1.28223e-105	6	IGFBP7
SH2D1B	2.48209e-108	1.44369	0.286	0.008	3.40394e-104	6	SH2D1B
XCL1	5.57839e-97	1.59595	0.318	0.015	7.6502e-93	6	XCL1
S1PR5	2.7276e-96	1.66765	0.383	0.025	3.74063e-92	6	S1PR5
APMAP	3.3096e-96	2.00358	0.636	0.092	4.53878e-92	6	APMAP
KLRF1	3.41606e-96	1.38661	0.266	0.008	4.68478e-92	6	KLRF1
GPR56	7.49592e-92	1.58449	0.325	0.017	1.02799e-87	6	GPR56
IL2RB	4.18568e-91	1.77497	0.455	0.043	5.74024e-87	6	IL2RB
CD2471	6.15199e-90	2.75992	0.844	0.232	8.43684e-86	6	CD247
C1orf21	2.52886e-82	1.39657	0.299	0.016	3.46808e-78	6	C1orf21
GZMM1	1.20991e-81	2.09342	0.812	0.212	1.65927e-77	6	GZMM
HOPX1	8.00972e-78	2.30278	0.636	0.12	1.09845e-73	6	HOPX
MATK	7.90453e-75	1.54698	0.429	0.048	1.08403e-70	6	MATK
PLEKHF1	6.75473e-71	1.48156	0.344	0.03	9.26344e-67	6	PLEKHF1
HAVCR2	3.62248e-70	1.88639	0.331	0.029	4.96787e-66	6	HAVCR2
B2M2	2.50562e-62	0.922591	1	1	3.43621e-58	6	B2M
HLA-C1	9.84738e-62	1.1724	1	0.978	1.35047e-57	6	HLA-C
TBX21	1.9505e-59	1.38284	0.305	0.029	2.67491e-55	6	TBX21
TPST21	1.91314e-58	1.56173	0.565	0.118	2.62369e-54	6	TPST2
CD73	2.23603e-58	1.88916	0.857	0.337	3.06649e-54	6	CD7
PTGDR	2.58115e-50	1.80977	0.292	0.032	3.53979e-46	6	PTGDR
HLA-A2	2.84848e-50	1.09682	1	0.961	3.90641e-46	6	HLA-A
C12orf751	2.9513e-49	1.54083	0.519	0.116	4.04742e-45	6	C12orf75
PLAC81	3.12656e-49	1.76711	0.864	0.427	4.28777e-45	6	PLAC8
CTSC2	2.34037e-46	1.43804	0.714	0.241	3.20958e-42	6	CTSC
UBB1	6.67914e-45	1.34212	0.968	0.764	9.15978e-41	6	UBB
ITGB22	3.56125e-41	1.64741	0.831	0.446	4.88389e-37	6	ITGB2
HLA-B1	7.58035e-41	0.909901	1	0.943	1.03957e-36	6	HLA-B
CD631	2.67187e-40	1.60578	0.74	0.32	3.6642e-36	6	CD63
NCR31	1.40282e-39	1.34206	0.396	0.077	1.92383e-35	6	NCR3
ARPC5L1	2.06403e-39	1.74219	0.552	0.165	2.83061e-35	6	ARPC5L
PFN13	4.32606e-39	0.991878	0.994	0.94	5.93276e-35	6	PFN1
SRGN2	6.60289e-39	1.23191	0.929	0.577	9.0552e-35	6	SRGN
RHOC1	1.66536e-38	1.30957	0.565	0.163	2.28388e-34	6	RHOC
CX3CR11	1.38646e-37	1.27712	0.338	0.061	1.90139e-33	6	CX3CR1
APOBEC3G1	2.53556e-35	1.34255	0.578	0.194	3.47727e-31	6	APOBEC3G
ID22	5.20082e-35	1.39165	0.779	0.361	7.1324e-31	6	ID2
RARRES31	6.16364e-35	1.35537	0.812	0.448	8.45282e-31	6	RARRES3
EFHD22	7.00391e-35	1.34732	0.539	0.173	9.60517e-31	6	EFHD2
SAMD31	8.55831e-35	1.73964	0.416	0.099	1.17369e-30	6	SAMD3
CCL51	2.11431e-34	1.75039	0.708	0.296	2.89956e-30	6	CCL5
CD992	4.23431e-34	1.24519	0.831	0.483	5.80694e-30	6	CD99
RAP1B2	5.41102e-33	1.2372	0.727	0.339	7.42067e-29	6	RAP1B
FCER1G2	2.32726e-32	0.963219	0.844	0.328	3.1916e-28	6	FCER1G
PLEK1	5.08649e-32	1.38024	0.494	0.15	6.97561e-28	6	PLEK
ZAP70	8.05962e-32	1.36645	0.442	0.124	1.1053e-27	6	ZAP70
CFL11	1.49627e-31	0.819523	0.994	0.906	2.05198e-27	6	CFL1
CHST12	2.26804e-31	1.43439	0.396	0.1	3.1104e-27	6	CHST12
ASCL2	2.14115e-29	1.13338	0.273	0.051	2.93638e-25	6	ASCL2
ABHD17A	8.51553e-29	1.08722	0.273	0.051	1.16782e-24	6	ABHD17A
PTPRCAP2	1.84895e-28	0.966663	0.903	0.625	2.53565e-24	6	PTPRCAP
CD300A1	2.86921e-28	1.36206	0.39	0.11	3.93484e-24	6	CD300A
MYL12A2	7.46332e-28	0.892282	0.987	0.863	1.02352e-23	6	MYL12A
PDIA31	9.2104e-28	1.19564	0.656	0.316	1.26311e-23	6	PDIA3
C5orf56	3.62263e-27	1.21836	0.39	0.109	4.96808e-23	6	C5orf56
CLIC12	4.55341e-27	1.14972	0.89	0.626	6.24455e-23	6	CLIC1
HCST1	4.95778e-27	1.23158	0.825	0.522	6.7991e-23	6	HCST
ALOX5AP1	5.97216e-27	1.51076	0.545	0.216	8.19022e-23	6	ALOX5AP
CCL31	7.27374e-27	1.85503	0.416	0.122	9.97521e-23	6	CCL3
HLA-E1	8.45769e-26	0.990291	0.968	0.877	1.15989e-21	6	HLA-E
IFITM12	8.10751e-25	1.23935	0.773	0.456	1.11186e-20	6	IFITM1
PPP1R181	1.43251e-24	1.27406	0.591	0.266	1.96455e-20	6	PPP1R18
MYO1F3	7.55838e-24	1.2179	0.539	0.219	1.03656e-19	6	MYO1F
ABI31	8.55294e-24	1.20802	0.448	0.161	1.17295e-19	6	ABI3
CALM12	1.66396e-23	0.951765	0.877	0.662	2.28195e-19	6	CALM1
RAC2	1.96604e-23	1.19452	0.864	0.632	2.69623e-19	6	RAC2
AOAH1	3.58812e-23	1.13741	0.364	0.111	4.92074e-19	6	AOAH
BST22	4.81164e-23	0.976254	0.753	0.427	6.59868e-19	6	BST2
IFITM21	9.39986e-23	0.907878	0.929	0.69	1.2891e-18	6	IFITM2
LITAF1	1.56314e-22	1.11674	0.61	0.292	2.14369e-18	6	LITAF
PSMB10	2.106e-22	1.1472	0.649	0.336	2.88817e-18	6	PSMB10
TYROBP2	4.84945e-22	0.35905	0.903	0.366	6.65054e-18	6	TYROBP
ARPC22	9.53662e-22	0.769748	0.929	0.789	1.30785e-17	6	ARPC2
CD532	1.09676e-21	1.05707	0.818	0.524	1.5041e-17	6	CD53
XBP11	7.20608e-21	1.43805	0.558	0.267	9.88242e-17	6	XBP1
UBE2F1	1.28943e-20	0.979488	0.364	0.118	1.76833e-16	6	UBE2F
ARL4C1	3.99308e-20	1.13174	0.461	0.185	5.47611e-16	6	ARL4C
1971-09-01	7.86895e-20	1.22441	0.61	0.322	1.07915e-15	6	2021-09-07
ACTB2	9.59396e-20	0.703534	1	0.991	1.31572e-15	6	ACTB
ANXA61	3.97868e-19	0.891339	0.571	0.277	5.45637e-15	6	ANXA6
CMC1	1.00757e-18	0.895837	0.292	0.083	1.38178e-14	6	CMC1
CTSD2	1.94048e-18	0.929969	0.513	0.225	2.66117e-14	6	CTSD
SDF4	3.13311e-18	1.0002	0.338	0.113	4.29675e-14	6	SDF4
DHRS71	7.8876e-18	1.11403	0.558	0.302	1.08171e-13	6	DHRS7
PSME22	9.28961e-18	0.899028	0.773	0.538	1.27398e-13	6	PSME2
SERF22	2.38247e-17	0.635955	0.948	0.85	3.26732e-13	6	SERF2
CALR1	4.2759e-17	1.105	0.519	0.262	5.86397e-13	6	CALR
GLIPR21	1.42242e-16	0.983801	0.461	0.207	1.95071e-12	6	GLIPR2
MYL62	3.66567e-16	0.569903	0.961	0.843	5.02711e-12	6	MYL6
NDUFB2	5.23116e-16	1.20262	0.591	0.332	7.17402e-12	6	NDUFB2
BZW1	6.46006e-16	0.887668	0.383	0.15	8.85933e-12	6	BZW1
UCP21	8.40525e-16	0.918158	0.766	0.542	1.1527e-11	6	UCP2
BSG	1.09133e-15	0.949044	0.481	0.234	1.49665e-11	6	BSG
CCND32	1.28585e-15	0.915783	0.623	0.397	1.76342e-11	6	CCND3
PPP1CA1	2.27826e-15	0.924575	0.708	0.504	3.12441e-11	6	PPP1CA
LAMP1	2.63625e-15	1.0294	0.422	0.19	3.61535e-11	6	LAMP1
BIN21	3.51532e-15	1.15947	0.604	0.353	4.82091e-11	6	BIN2
TXNIP1	3.99551e-15	0.769504	0.864	0.747	5.47945e-11	6	TXNIP
HSPA51	4.37719e-15	0.97405	0.416	0.185	6.00288e-11	6	HSPA5
CYBA2	5.39998e-15	0.607625	0.961	0.836	7.40554e-11	6	CYBA
ITGB7	5.59062e-15	0.861414	0.338	0.128	7.66697e-11	6	ITGB7
DBI	6.01843e-15	0.861961	0.584	0.34	8.25367e-11	6	DBI
C9orf1421	6.41044e-15	0.921567	0.474	0.228	8.79128e-11	6	C9orf142
CISD3	5.25822e-14	0.968226	0.318	0.118	7.21113e-10	6	CISD3
HNRNPA2B11	5.36491e-14	0.978078	0.753	0.625	7.35744e-10	6	HNRNPA2B1
PSMB8	6.09542e-14	0.946194	0.682	0.445	8.35926e-10	6	PSMB8
GNG21	6.47036e-14	0.963708	0.305	0.114	8.87345e-10	6	GNG2
CYB5B	8.85312e-14	1.0353	0.26	0.086	1.21412e-09	6	CYB5B
PPIA1	1.11248e-13	0.663188	0.851	0.731	1.52566e-09	6	PPIA
PSME1	1.24067e-13	0.593164	0.851	0.725	1.70146e-09	6	PSME1
SH3BGRL32	1.52266e-13	0.51951	0.974	0.85	2.08817e-09	6	SH3BGRL3
SLC9A3R11	4.07464e-13	1.14807	0.357	0.152	5.58796e-09	6	SLC9A3R1
FDPS	7.17377e-13	0.794923	0.318	0.127	9.83811e-09	6	FDPS
SELT1	1.1261e-12	0.844871	0.506	0.287	1.54433e-08	6	SELT
ANXA12	1.25509e-12	0.665423	0.805	0.577	1.72123e-08	6	ANXA1
ARL6IP1	1.37021e-12	0.837758	0.39	0.178	1.87911e-08	6	ARL6IP1
GCHFR	1.66382e-12	0.959664	0.26	0.093	2.28176e-08	6	GCHFR
IL2RG2	2.08526e-12	0.93635	0.636	0.423	2.85973e-08	6	IL2RG
DRAP11	3.11985e-12	0.694531	0.669	0.45	4.27856e-08	6	DRAP1
PRDX52	3.19928e-12	0.750107	0.558	0.341	4.38749e-08	6	PRDX5
PRMT2	3.6919e-12	0.90551	0.416	0.206	5.06306e-08	6	PRMT2
HNRNPA31	6.18243e-12	0.715042	0.526	0.3	8.47859e-08	6	HNRNPA3
DNAJB111	6.21805e-12	0.722376	0.253	0.088	8.52744e-08	6	DNAJB11
CAP11	1.03161e-11	0.702581	0.597	0.4	1.41475e-07	6	CAP1
ANXA41	1.60983e-11	0.732526	0.253	0.091	2.20772e-07	6	ANXA4
MRPS6	2.76468e-11	1.09698	0.338	0.152	3.79148e-07	6	MRPS6
CD164	3.2256e-11	0.82217	0.532	0.332	4.42359e-07	6	CD164
SKAP1	3.65651e-11	0.777214	0.312	0.131	5.01453e-07	6	SKAP1
ACTG11	3.90676e-11	0.840443	0.922	0.857	5.35773e-07	6	ACTG1
RNF126	5.55758e-11	0.819148	0.338	0.151	7.62166e-07	6	RNF126
HDDC2	6.11575e-11	0.7277	0.312	0.133	8.38714e-07	6	HDDC2
PRKCH	9.57395e-11	0.779451	0.279	0.115	1.31297e-06	6	PRKCH
PSMC41	9.84519e-11	1.16052	0.344	0.156	1.35017e-06	6	PSMC4
TMED91	1.06959e-10	0.762472	0.442	0.24	1.46683e-06	6	TMED9
YWHAQ2	1.54567e-10	0.725938	0.474	0.275	2.11973e-06	6	YWHAQ
POLR2G	2.44346e-10	0.658435	0.435	0.232	3.35095e-06	6	POLR2G
HSP90B11	3.24299e-10	0.915181	0.422	0.236	4.44744e-06	6	HSP90B1
CD2BP2	3.30788e-10	0.607137	0.253	0.097	4.53642e-06	6	CD2BP2
RCN2	4.25433e-10	0.711706	0.286	0.122	5.83439e-06	6	RCN2
SUN21	4.51063e-10	0.736677	0.429	0.239	6.18588e-06	6	SUN2
FKBP11	5.51801e-10	0.906004	0.286	0.125	7.5674e-06	6	FKBP11
OPTN1	8.63975e-10	0.571324	0.305	0.133	1.18486e-05	6	OPTN
ENSA	8.93073e-10	0.728229	0.487	0.298	1.22476e-05	6	ENSA
FLOT1	1.02809e-09	0.763525	0.26	0.106	1.40992e-05	6	FLOT1
MANF	1.29779e-09	0.863878	0.279	0.119	1.77979e-05	6	MANF
FAM49B1	1.58539e-09	0.770562	0.468	0.291	2.17421e-05	6	FAM49B
SCP2	1.81966e-09	1.3028	0.455	0.261	2.49548e-05	6	SCP2
PPIB1	2.1011e-09	0.723878	0.63	0.463	2.88145e-05	6	PPIB
EBP	2.13543e-09	0.674722	0.253	0.104	2.92853e-05	6	EBP
ARPC4	2.47262e-09	0.719951	0.487	0.303	3.39095e-05	6	ARPC4
TAP12	3.16692e-09	0.697801	0.403	0.221	4.34311e-05	6	TAP1
AES2	3.87435e-09	0.638658	0.688	0.476	5.31328e-05	6	AES
TMEM50A1	4.20725e-09	0.488611	0.448	0.254	5.76983e-05	6	TMEM50A
LYAR1	4.47261e-09	1.23797	0.357	0.174	6.13374e-05	6	LYAR
PSMB91	4.60544e-09	0.603005	0.727	0.572	6.31591e-05	6	PSMB9
PSMD8	4.78972e-09	0.62048	0.474	0.287	6.56862e-05	6	PSMD8
DEF6	4.88465e-09	0.579819	0.312	0.147	6.69881e-05	6	DEF6
BTN3A21	6.12301e-09	0.558528	0.383	0.206	8.3971e-05	6	BTN3A2
SYTL11	7.90192e-09	0.751885	0.318	0.159	0.000108367	6	SYTL1
FLNA2	9.11811e-09	0.914173	0.37	0.201	0.000125046	6	FLNA
SNAPIN	9.35549e-09	0.592028	0.253	0.108	0.000128301	6	SNAPIN
CTDSP1	1.149e-08	0.648006	0.253	0.109	0.000157574	6	CTDSP1
SASH3	1.20553e-08	0.688363	0.26	0.113	0.000165326	6	SASH3
DSTN	1.53257e-08	0.680682	0.351	0.188	0.000210177	6	DSTN
WDR11	1.72471e-08	0.802663	0.429	0.25	0.000236526	6	WDR1
DDOST	1.78535e-08	0.898233	0.344	0.179	0.000244843	6	DDOST
JAK1	2.06134e-08	0.692481	0.351	0.189	0.000282693	6	JAK1
RASSF5	2.30875e-08	0.710985	0.338	0.175	0.000316622	6	RASSF5
PTGER2	2.34147e-08	0.793434	0.273	0.129	0.000321109	6	PTGER2
SDF2L1	2.38397e-08	0.700417	0.286	0.135	0.000326938	6	SDF2L1
TBCB1	2.44313e-08	0.495832	0.474	0.295	0.000335051	6	TBCB
MIEN11	2.54977e-08	0.687226	0.331	0.171	0.000349675	6	MIEN1
MYL12B3	2.58473e-08	0.430648	0.818	0.689	0.00035447	6	MYL12B
PSMB1	2.90278e-08	0.644345	0.61	0.455	0.000398087	6	PSMB1
GHITM	4.41444e-08	0.522146	0.526	0.361	0.000605397	6	GHITM
EIF3G	4.66911e-08	0.619722	0.688	0.563	0.000640322	6	EIF3G
TRAPPC11	4.81801e-08	0.708082	0.604	0.437	0.000660741	6	TRAPPC1
UBC2	4.87248e-08	0.478309	0.922	0.844	0.000668211	6	UBC
ATP6AP21	5.1127e-08	0.641214	0.416	0.242	0.000701155	6	ATP6AP2
P4HB1	6.05073e-08	0.739054	0.396	0.226	0.000829798	6	P4HB
SERPINB11	6.38842e-08	0.519819	0.532	0.352	0.000876108	6	SERPINB1
CHCHD21	7.1362e-08	0.466198	0.779	0.703	0.000978658	6	CHCHD2
ACTR3	8.04844e-08	0.550797	0.565	0.401	0.00110376	6	ACTR3
CARHSP1	9.96292e-08	0.496347	0.253	0.114	0.00136631	6	CARHSP1
HSP90AA12	1.01756e-07	0.692418	0.656	0.526	0.00139548	6	HSP90AA1
IRF1	1.06153e-07	0.763506	0.435	0.276	0.00145579	6	IRF1
RALY2	1.10854e-07	0.461043	0.383	0.217	0.00152025	6	RALY
SDHAF2	1.35328e-07	0.564976	0.253	0.119	0.00185589	6	SDHAF2
PSENEN1	1.35968e-07	0.590066	0.273	0.132	0.00186467	6	PSENEN
OSTF11	1.44644e-07	0.7537	0.468	0.299	0.00198364	6	OSTF1
CCDC1071	1.61252e-07	0.584163	0.312	0.16	0.00221141	6	CCDC107
ABI1	1.93292e-07	0.663818	0.26	0.122	0.0026508	6	ABI1
RBM39	2.06965e-07	0.522304	0.513	0.344	0.00283832	6	RBM39
HMOX2	2.16306e-07	0.798911	0.318	0.174	0.00296642	6	HMOX2
EMP32	2.27155e-07	0.559255	0.864	0.723	0.0031152	6	EMP3
PSMA5	2.51108e-07	0.598911	0.422	0.258	0.00344369	6	PSMA5
MAF1	3.77724e-07	0.458878	0.377	0.218	0.00518011	6	MAF1
TPI12	4.09529e-07	0.542634	0.63	0.497	0.00561627	6	TPI1
PRPF40A	4.13888e-07	0.664055	0.253	0.122	0.00567606	6	PRPF40A
LSM1	4.36975e-07	0.62802	0.292	0.147	0.00599268	6	LSM1
LCP12	4.55689e-07	0.731365	0.526	0.377	0.00624933	6	LCP1
ACP1	4.56723e-07	0.715149	0.377	0.226	0.0062635	6	ACP1
BAX1	4.98541e-07	0.77638	0.442	0.296	0.00683699	6	BAX
ARPC51	5.33764e-07	0.462667	0.656	0.514	0.00732004	6	ARPC5
EVL2	6.12871e-07	0.561893	0.682	0.521	0.00840491	6	EVL
FGR2	6.62924e-07	0.880446	0.357	0.204	0.00909134	6	FGR
SRI1	6.92987e-07	0.531724	0.416	0.256	0.00950362	6	SRI
CDC42SE1	7.21458e-07	0.587307	0.357	0.209	0.00989407	6	CDC42SE1
MRPS12	7.42534e-07	0.387974	0.266	0.131	0.0101831	6	MRPS12
TBC1D10C1	7.5943e-07	0.548686	0.448	0.292	0.0104148	6	TBC1D10C
CAPZB2	7.5969e-07	0.451416	0.688	0.548	0.0104184	6	CAPZB
RBM8A	8.25805e-07	0.814276	0.461	0.306	0.0113251	6	RBM8A
PDIA6	8.469e-07	0.582042	0.377	0.23	0.0116144	6	PDIA6
GOLGA7	8.62277e-07	0.548428	0.279	0.148	0.0118253	6	GOLGA7
ENO11	9.81619e-07	0.40185	0.695	0.553	0.0134619	6	ENO1
CD972	1.10919e-06	0.652901	0.364	0.215	0.0152114	6	CD97
RAB7A	1.14812e-06	0.580716	0.448	0.303	0.0157453	6	RAB7A
MAP1LC3B	1.15925e-06	0.558068	0.39	0.242	0.015898	6	MAP1LC3B
WIPF1	1.29895e-06	0.721978	0.338	0.198	0.0178138	6	WIPF1
NOP102	1.30869e-06	0.587622	0.442	0.286	0.0179474	6	NOP10
CHMP2A2	1.36342e-06	0.692266	0.403	0.253	0.0186979	6	CHMP2A
SEPW1	1.67374e-06	0.500689	0.39	0.245	0.0229536	6	SEPW1
CD471	1.99989e-06	0.467444	0.39	0.239	0.0274264	6	CD47
VDAC3	2.45425e-06	0.352168	0.292	0.161	0.0336576	6	VDAC3
SPCS21	2.68281e-06	0.538858	0.429	0.295	0.0367921	6	SPCS2
DCTN31	3.09997e-06	0.507535	0.364	0.225	0.0425129	6	DCTN3
IMP3	3.4352e-06	0.473514	0.351	0.206	0.0471104	6	IMP3
DENND2D	3.46249e-06	0.77486	0.286	0.153	0.0474845	6	DENND2D
C19orf10	4.07268e-06	0.691844	0.344	0.209	0.0558527	6	C19orf10
HMGN3	4.07486e-06	0.563104	0.37	0.229	0.0558827	6	HMGN3
PIM12	4.10321e-06	0.696475	0.318	0.178	0.0562714	6	PIM1
PAIP2	4.45811e-06	0.471716	0.455	0.306	0.0611385	6	PAIP2
RPA21	4.7053e-06	0.46062	0.312	0.174	0.0645285	6	RPA2
SIGIRR	4.72241e-06	0.749801	0.351	0.217	0.0647631	6	SIGIRR
KDELR2	4.98256e-06	0.516254	0.305	0.172	0.0683309	6	KDELR2
C19orf66	5.10407e-06	0.597061	0.292	0.163	0.0699973	6	C19orf66
STK17A2	5.52954e-06	0.593962	0.468	0.306	0.0758321	6	STK17A
DNAJB6	5.5675e-06	0.490398	0.312	0.176	0.0763527	6	DNAJB6
MSN2	5.58048e-06	0.594013	0.422	0.275	0.0765307	6	MSN
GIMAP73	5.99828e-06	0.443225	0.656	0.527	0.0822604	6	GIMAP7
CNPY2	6.01863e-06	0.595439	0.299	0.171	0.0825395	6	CNPY2
PGAM12	6.40847e-06	0.612748	0.357	0.228	0.0878858	6	PGAM1
UBE2L3	7.60809e-06	0.60642	0.357	0.23	0.104337	6	UBE2L3
EMC4	8.81457e-06	0.54877	0.331	0.201	0.120883	6	EMC4
RNF2131	8.98465e-06	0.580798	0.351	0.219	0.123216	6	RNF213
CYCS	9.05075e-06	0.518941	0.442	0.308	0.124122	6	CYCS
PDAP1	9.25674e-06	0.494825	0.305	0.177	0.126947	6	PDAP1
HMGB11	9.36365e-06	0.499156	0.701	0.627	0.128413	6	HMGB1
ZFAND61	1.07809e-05	0.575896	0.279	0.157	0.147849	6	ZFAND6
TERF2IP	1.08598e-05	0.406795	0.357	0.219	0.148931	6	TERF2IP
SEC61B	1.08819e-05	0.386703	0.455	0.311	0.149234	6	SEC61B
SUB1	1.20628e-05	0.637221	0.422	0.294	0.16543	6	SUB1
SNRNP70	1.23021e-05	0.441211	0.253	0.133	0.168711	6	SNRNP70
TBCC	1.24402e-05	0.434224	0.273	0.15	0.170605	6	TBCC
HLA-F1	1.24573e-05	0.898047	0.455	0.322	0.17084	6	HLA-F
HDAC1	1.32464e-05	0.391116	0.273	0.149	0.181661	6	HDAC1
SRSF3	1.50545e-05	0.93182	0.571	0.467	0.206458	6	SRSF3
TGFB12	1.63254e-05	0.450425	0.325	0.192	0.223886	6	TGFB1
PLEKHJ1	1.64512e-05	0.433858	0.279	0.158	0.225611	6	PLEKHJ1
LMAN2	1.68946e-05	0.608847	0.377	0.251	0.231693	6	LMAN2
SRSF2	1.79674e-05	0.884237	0.506	0.385	0.246404	6	SRSF2
TMEM59	1.94703e-05	0.45228	0.513	0.388	0.267016	6	TMEM59
CFLAR	2.02677e-05	0.530478	0.312	0.19	0.277951	6	CFLAR
NDUFA6	2.11792e-05	0.541854	0.279	0.159	0.290452	6	NDUFA6
BANF1	2.20447e-05	0.487855	0.37	0.238	0.302322	6	BANF1
CDC42	2.23909e-05	0.524542	0.481	0.364	0.307069	6	CDC42
CCDC121	2.70878e-05	0.483165	0.364	0.241	0.371482	6	CCDC12
ADH5	2.7941e-05	0.473133	0.266	0.15	0.383183	6	ADH5
TCF251	2.89021e-05	0.573984	0.364	0.245	0.396363	6	TCF25
ATF6B	3.23782e-05	0.548391	0.253	0.143	0.444035	6	ATF6B
DDIT41	3.25534e-05	0.57024	0.331	0.213	0.446438	6	DDIT4
AKR1B1	3.30346e-05	0.527614	0.26	0.146	0.453036	6	AKR1B1
MAPRE1	3.58939e-05	0.51943	0.266	0.151	0.492249	6	MAPRE1
ADRM1	3.99946e-05	0.501747	0.286	0.169	0.548486	6	ADRM1
CDK2AP2	4.01236e-05	0.671222	0.266	0.155	0.550255	6	CDK2AP2
NDUFB72	4.44402e-05	0.656794	0.396	0.28	0.609453	6	NDUFB7
DECR1	4.615e-05	0.402131	0.299	0.179	0.632901	6	DECR1
COPE2	4.8334e-05	0.384943	0.539	0.427	0.662853	6	COPE
SNRPE	4.97783e-05	0.38335	0.266	0.151	0.682659	6	SNRPE
DOK23	5.40258e-05	0.482998	0.357	0.233	0.74091	6	DOK2
MYH9	5.77496e-05	0.455763	0.299	0.182	0.791978	6	MYH9
ARHGDIB1	6.3619e-05	0.427113	0.942	0.906	0.872471	6	ARHGDIB
SRSF91	6.40993e-05	0.477662	0.416	0.3	0.879058	6	SRSF9
MIR142	6.5557e-05	0.661207	0.273	0.162	0.899048	6	MIR142
IDH21	6.76332e-05	0.455087	0.286	0.176	0.927522	6	IDH2
ATP1B31	6.83022e-05	0.749313	0.273	0.158	0.936696	6	ATP1B3
RNF1671	6.92676e-05	0.504297	0.286	0.165	0.949935	6	RNF167
HSPA83	7.07013e-05	0.380705	0.721	0.666	0.969597	6	HSPA8
SP1001	7.58191e-05	0.433529	0.396	0.262	1	6	SP100
IFI16	7.64699e-05	0.546792	0.279	0.17	1	6	IFI16
LSP11	8.08993e-05	0.339413	0.662	0.535	1	6	LSP1
POLR3GL	9.35815e-05	0.525655	0.305	0.198	1	6	POLR3GL
ITGB1BP1	9.50058e-05	0.359384	0.273	0.157	1	6	ITGB1BP1
POLR2L1	9.82146e-05	0.458809	0.468	0.351	1	6	POLR2L
GAPDH1	0.000105629	0.375076	0.903	0.839	1	6	GAPDH
C11orf58	0.000107689	0.401985	0.487	0.379	1	6	C11orf58
PHPT11	0.000108058	0.493566	0.266	0.157	1	6	PHPT1
MDH1	0.000109504	0.472137	0.351	0.228	1	6	MDH1
SUMO2	0.000116488	0.37586	0.682	0.59	1	6	SUMO2
ATP5J22	0.000117139	0.425635	0.429	0.319	1	6	ATP5J2
H2AFZ1	0.000120331	0.596929	0.5	0.407	1	6	H2AFZ
C17orf62	0.00012208	0.434748	0.253	0.148	1	6	C17orf62
HNRNPM	0.000125722	0.452574	0.429	0.304	1	6	HNRNPM
ARHGAP30	0.000142414	0.359931	0.266	0.156	1	6	ARHGAP30
HNRNPF1	0.000149845	0.377602	0.487	0.373	1	6	HNRNPF
CDKN2D1	0.000155136	0.45951	0.331	0.214	1	6	CDKN2D
SNRPB1	0.000167081	0.453462	0.435	0.339	1	6	SNRPB
RBM3	0.000185091	0.761306	0.701	0.634	1	6	RBM3
GYPC1	0.000186037	0.461946	0.409	0.283	1	6	GYPC
SEC11C	0.000186477	0.394014	0.266	0.158	1	6	SEC11C
PSMC31	0.000205601	0.498421	0.273	0.168	1	6	PSMC3
NDUFB9	0.000207596	0.316718	0.545	0.425	1	6	NDUFB9
FAM96B	0.00021913	0.95292	0.364	0.257	1	6	FAM96B
PPP2R5C2	0.000236528	0.504597	0.344	0.237	1	6	PPP2R5C
MDH2	0.00025479	0.498169	0.396	0.292	1	6	MDH2
TPM31	0.000258164	0.404262	0.558	0.467	1	6	TPM3
SELL2	0.000262547	0.492593	0.565	0.462	1	6	SELL
CAST1	0.000269754	0.61693	0.253	0.158	1	6	CAST
GLRX2	0.000276324	0.381062	0.468	0.366	1	6	GLRX
CSNK2B	0.000278803	0.83749	0.435	0.334	1	6	CSNK2B
BUD31	0.000286219	0.511963	0.351	0.249	1	6	BUD31
C9orf161	0.00029411	0.256415	0.474	0.355	1	6	C9orf16
FERMT3	0.000316776	0.549446	0.279	0.175	1	6	FERMT3
PPP2R1A	0.000326559	0.379814	0.273	0.166	1	6	PPP2R1A
RHOA2	0.000349992	0.32754	0.662	0.555	1	6	RHOA
RHOF	0.000372793	0.453687	0.266	0.167	1	6	RHOF
WSB11	0.000387829	0.414544	0.279	0.175	1	6	WSB1
TMBIM6	0.000393594	0.392554	0.578	0.508	1	6	TMBIM6
CCT51	0.000426673	0.484333	0.273	0.18	1	6	CCT5
MYO1G1	0.000431555	0.460348	0.331	0.227	1	6	MYO1G
TUBA1B1	0.000455769	0.850176	0.513	0.423	1	6	TUBA1B
NDUFB8.1	0.000472191	0.489522	0.481	0.393	1	6	NDUFB8.1
MRPL34	0.000481566	0.385768	0.292	0.189	1	6	MRPL34
COPZ1	0.000488391	0.507063	0.286	0.187	1	6	COPZ1
PSMA72	0.000517984	0.783682	0.636	0.555	1	6	PSMA7
ANP32A	0.000522894	0.351701	0.299	0.19	1	6	ANP32A
TMEM160	0.000530927	0.444422	0.286	0.184	1	6	TMEM160
CORO1A1	0.000538518	0.382246	0.825	0.799	1	6	CORO1A
SRSF11	0.000600951	0.381673	0.344	0.239	1	6	SRSF11
AKAP13	0.000608676	0.611844	0.253	0.158	1	6	AKAP13
HNRNPU	0.000616943	0.394643	0.344	0.242	1	6	HNRNPU
H3F3A2	0.000636814	0.313504	0.494	0.375	1	6	H3F3A
PARK71	0.000656027	0.378059	0.558	0.481	1	6	PARK7
RNF166	0.000673719	0.505424	0.253	0.161	1	6	RNF166
PSMB21	0.000674565	0.461462	0.305	0.21	1	6	PSMB2
LIMD21	0.000698593	0.393156	0.747	0.65	1	6	LIMD2
SKP11	0.000708599	0.288215	0.552	0.46	1	6	SKP1
SLC25A31	0.000737034	0.368794	0.584	0.516	1	6	SLC25A3
2021-09-06	0.000750226	0.407022	0.305	0.2	1	6	2021-09-06
KLF2	0.000773035	0.505163	0.708	0.602	1	6	KLF2
PSMA2.1	0.000779667	0.324877	0.331	0.224	1	6	PSMA2.1
NDUFS2	0.000792024	0.860854	0.26	0.165	1	6	NDUFS2
SF3B14	0.00080058	0.466723	0.292	0.195	1	6	SF3B14
PSMD41	0.000809877	0.398122	0.377	0.278	1	6	PSMD4
[truncated: 933 more rows]

## Sheet: table s2-2 GO-based_FC-DEF
	p_val	avg_log2FC	pct.1	pct.2	p_val_adj	cluster	gene
go-rna-binding	4.87907e-108	0.257615	1	1	3.64222e-104	0	go-rna-binding
go-t-cell-differentiation-in-thymus	6.50037e-96	0.699576	1	0.968	4.85253e-92	0	go-t-cell-differentiation-in-thymus
go-ribonucleoprotein-complex	3.44993e-89	0.263929	1	1	2.57537e-85	0	go-ribonucleoprotein-complex
go-ribonucleoprotein-complex-subunit-organization	6.367e-86	0.303857	1	1	4.75297e-82	0	go-ribonucleoprotein-complex-subunit-organization
go-ribonucleoprotein-complex-biogenesis	9.85969e-84	0.293583	1	1	7.36026e-80	0	go-ribonucleoprotein-complex-biogenesis
go-thymic-t-cell-selection	2.25988e-80	0.734782	0.91	0.592	1.687e-76	0	go-thymic-t-cell-selection
go-cytoplasmic-side-of-rough-endoplasmic-reticulum-membrane	1.42175e-79	0.267651	0.995	0.941	1.06134e-75	0	go-cytoplasmic-side-of-rough-endoplasmic-reticulum-membrane
go-rna-metabolic-process	3.16538e-69	0.301977	1	0.998	2.36296e-65	0	go-rna-metabolic-process
go-t-cell-receptor-complex	9.5996e-67	0.747313	0.837	0.486	7.1661e-63	0	go-t-cell-receptor-complex
go-positive-thymic-t-cell-selection	1.24852e-66	0.677892	0.838	0.528	9.32017e-63	0	go-positive-thymic-t-cell-selection
go-positive-t-cell-selection	1.3423e-64	0.616488	0.948	0.714	1.00203e-60	0	go-positive-t-cell-selection
go-t-cell-differentiation	1.87106e-63	0.445233	1	1	1.39675e-59	0	go-t-cell-differentiation
go-translation-regulator-activity	9.47554e-61	0.266227	1	0.999	7.07349e-57	0	go-translation-regulator-activity
go-nucleolus	2.89687e-59	0.251956	1	1	2.16251e-55	0	go-nucleolus
go-t-cell-selection	9.3221e-59	0.558399	0.987	0.865	6.95895e-55	0	go-t-cell-selection
go-mrna-binding	2.46794e-58	0.285524	1	1	1.84232e-54	0	go-mrna-binding
go-translation-regulator-activity-nucleic-acid-binding	4.63754e-57	0.296169	1	0.998	3.46192e-53	0	go-translation-regulator-activity-nucleic-acid-binding
go-rna-splicing-via-transesterification-reactions	1.14141e-56	0.33006	1	0.999	8.52066e-53	0	go-rna-splicing-via-transesterification-reactions
go-rna-splicing	2.92076e-56	0.310017	1	0.999	2.18034e-52	0	go-rna-splicing
go-translation-factor-activity-rna-binding	1.3475e-53	0.28986	1	0.997	1.00591e-49	0	go-translation-factor-activity-rna-binding
go-spliceosomal-complex	2.05046e-49	0.319569	1	0.999	1.53067e-45	0	go-spliceosomal-complex
go-mrna-3-utr-binding	7.13821e-49	0.298043	1	0.995	5.32868e-45	0	go-mrna-3-utr-binding
go-mrna-metabolic-process	2.75871e-48	0.291748	1	1	2.05938e-44	0	go-mrna-metabolic-process
go-positive-regulation-of-t-cell-receptor-signaling-pathway	1.71247e-47	0.689872	0.553	0.281	1.27836e-43	0	go-positive-regulation-of-t-cell-receptor-signaling-pathway
go-mitotic-dna-integrity-checkpoint	2.90825e-44	0.266645	0.962	0.866	2.17101e-40	0	go-mitotic-dna-integrity-checkpoint
go-regulation-of-rna-splicing	3.32593e-44	0.312272	1	0.999	2.48281e-40	0	go-regulation-of-rna-splicing
go-phosphatidylinositol-3-kinase-binding	8.0866e-43	0.467944	0.879	0.711	6.03664e-39	0	go-phosphatidylinositol-3-kinase-binding
go-t-cell-receptor-binding	3.03068e-42	0.660252	0.589	0.335	2.2624e-38	0	go-t-cell-receptor-binding
go-response-to-bronchodilator	5.13142e-42	0.336814	0.781	0.664	3.8306e-38	0	go-response-to-bronchodilator
go-unfolded-protein-binding	3.09254e-41	0.3625	1	0.99	2.30858e-37	0	go-unfolded-protein-binding
go-rna-localization	6.07616e-41	0.285373	1	0.997	4.53585e-37	0	go-rna-localization
go-ribonucleoprotein-complex-binding	1.98523e-40	0.277814	1	0.998	1.48197e-36	0	go-ribonucleoprotein-complex-binding
go-regulation-of-mrna-splicing-via-spliceosome	5.59784e-40	0.326771	1	0.991	4.17878e-36	0	go-regulation-of-mrna-splicing-via-spliceosome
go-pre-mrna-binding	1.52092e-39	0.410199	0.985	0.896	1.13537e-35	0	go-pre-mrna-binding
go-regulation-of-rna-metabolic-process	3.24542e-39	0.284292	1	0.999	2.42271e-35	0	go-regulation-of-rna-metabolic-process
go-purine-ntp-dependent-helicase-activity	1.11461e-38	0.297804	0.943	0.843	8.32059e-35	0	go-purine-ntp-dependent-helicase-activity
go-regulation-of-nuclear-transcribed-mrna-catabolic-process-deadenylation-dependent-decay	2.56921e-38	0.452972	0.861	0.748	1.91791e-34	0	go-regulation-of-nuclear-transcribed-mrna-catabolic-process-deadenylation-dependent-decay
go-dna-biosynthetic-process	9.72367e-38	0.255885	1	1	7.25872e-34	0	go-dna-biosynthetic-process
go-negative-t-cell-selection	1.14215e-37	0.611175	0.595	0.383	8.52618e-34	0	go-negative-t-cell-selection
go-positive-regulation-of-mrna-catabolic-process	4.23815e-37	0.421628	0.954	0.862	3.16378e-33	0	go-positive-regulation-of-mrna-catabolic-process
go-catalytic-step-2-spliceosome	6.19871e-37	0.306952	1	0.991	4.62734e-33	0	go-catalytic-step-2-spliceosome
go-g1-dna-damage-checkpoint	1.03576e-36	0.287276	0.899	0.799	7.73198e-33	0	go-g1-dna-damage-checkpoint
go-dna-metabolic-process	1.12823e-36	0.272017	1	1	8.42223e-33	0	go-dna-metabolic-process
go-establishment-of-rna-localization	3.73506e-36	0.271366	1	0.996	2.78822e-32	0	go-establishment-of-rna-localization
go-nucleobase-containing-compound-transport	6.05546e-36	0.262762	1	0.998	4.5204e-32	0	go-nucleobase-containing-compound-transport
go-r-smad-binding	1.05859e-35	0.352926	0.853	0.713	7.9024e-32	0	go-r-smad-binding
go-chromosome-organization	1.7339e-35	0.265267	1	1	1.29436e-31	0	go-chromosome-organization
go-rna-export-from-nucleus	1.87481e-35	0.276568	1	0.994	1.39954e-31	0	go-rna-export-from-nucleus
go-translation-elongation-factor-activity	2.17215e-35	0.26058	0.997	0.957	1.62151e-31	0	go-translation-elongation-factor-activity
go-signal-transduction-by-p53-class-mediator	3.26007e-35	0.27434	1	0.999	2.43364e-31	0	go-signal-transduction-by-p53-class-mediator
go-translation-initiation-factor-activity	3.90201e-35	0.282949	1	0.987	2.91285e-31	0	go-translation-initiation-factor-activity
go-translation-preinitiation-complex	1.37671e-34	0.294943	0.987	0.944	1.02772e-30	0	go-translation-preinitiation-complex
go-rna-helicase-activity	1.80264e-34	0.372781	0.9	0.801	1.34567e-30	0	go-rna-helicase-activity
go-response-to-interleukin-4	2.0786e-34	0.386989	0.966	0.881	1.55167e-30	0	go-response-to-interleukin-4
go-negative-regulation-of-nuclear-division	3.67219e-34	0.277731	0.799	0.706	2.74129e-30	0	go-negative-regulation-of-nuclear-division
go-alpha-beta-t-cell-receptor-complex	5.88113e-34	0.677921	0.473	0.254	4.39026e-30	0	go-alpha-beta-t-cell-receptor-complex
go-regulation-of-mrna-processing	7.59995e-34	0.302128	1	0.994	5.67336e-30	0	go-regulation-of-mrna-processing
go-eukaryotic-translation-initiation-factor-3-complex	1.60639e-33	0.340999	0.94	0.864	1.19917e-29	0	go-eukaryotic-translation-initiation-factor-3-complex
go-regulation-of-dna-biosynthetic-process	1.97526e-33	0.365365	0.998	0.968	1.47453e-29	0	go-regulation-of-dna-biosynthetic-process
go-error-prone-translesion-synthesis	3.54487e-33	0.253906	0.98	0.935	2.64624e-29	0	go-error-prone-translesion-synthesis
go-rrna-containing-ribonucleoprotein-complex-export-from-nucleus	3.02842e-32	0.279495	0.979	0.888	2.26071e-28	0	go-rrna-containing-ribonucleoprotein-complex-export-from-nucleus
go-error-free-translesion-synthesis	3.66465e-32	0.251947	0.987	0.938	2.73566e-28	0	go-error-free-translesion-synthesis
go-formation-of-cytoplasmic-translation-initiation-complex	3.77871e-32	0.3362	0.927	0.851	2.82081e-28	0	go-formation-of-cytoplasmic-translation-initiation-complex
go-eukaryotic-48s-preinitiation-complex	5.47663e-32	0.332291	0.928	0.855	4.08831e-28	0	go-eukaryotic-48s-preinitiation-complex
go-alternative-mrna-splicing-via-spliceosome	7.21468e-32	0.33339	0.998	0.976	5.38576e-28	0	go-alternative-mrna-splicing-via-spliceosome
go-negative-regulation-of-rna-splicing	7.2202e-32	0.290529	0.997	0.947	5.38988e-28	0	go-negative-regulation-of-rna-splicing
go-cytoplasmic-translational-initiation	8.05966e-32	0.283183	0.995	0.965	6.01654e-28	0	go-cytoplasmic-translational-initiation
go-positive-regulation-of-dna-biosynthetic-process	8.72697e-32	0.374558	0.985	0.92	6.51468e-28	0	go-positive-regulation-of-dna-biosynthetic-process
go-interstrand-cross-link-repair	1.2338e-31	0.271156	0.985	0.952	9.21032e-28	0	go-interstrand-cross-link-repair
go-mrna-cis-splicing-via-spliceosome	1.02652e-30	0.305893	0.876	0.778	7.66294e-27	0	go-mrna-cis-splicing-via-spliceosome
go-rna-3-end-processing	6.09528e-30	0.302524	1	0.99	4.55013e-26	0	go-rna-3-end-processing
go-poly-pyrimidine-tract-binding	6.33446e-30	0.312376	0.984	0.926	4.72868e-26	0	go-poly-pyrimidine-tract-binding
go-positive-regulation-of-antigen-receptor-mediated-signaling-pathway	9.71699e-29	0.398851	0.796	0.642	7.25374e-25	0	go-positive-regulation-of-antigen-receptor-mediated-signaling-pathway
go-nuclear-body	2.29584e-28	0.265639	1	0.999	1.71385e-24	0	go-nuclear-body
go-rna-dependent-dna-biosynthetic-process	3.18503e-28	0.34034	0.995	0.94	2.37762e-24	0	go-rna-dependent-dna-biosynthetic-process
go-spliceosomal-complex-assembly	3.54859e-28	0.29499	0.949	0.87	2.64903e-24	0	go-spliceosomal-complex-assembly
go-chaperone-cofactor-dependent-protein-refolding	9.41422e-28	0.368933	0.865	0.758	7.02771e-24	0	go-chaperone-cofactor-dependent-protein-refolding
go-dna-conformation-change	1.19207e-27	0.298477	1	0.997	8.89879e-24	0	go-dna-conformation-change
go-positive-regulation-of-cell-cycle	1.43994e-27	0.325135	1	0.995	1.07492e-23	0	go-positive-regulation-of-cell-cycle
go-telomere-organization	2.06022e-27	0.334967	1	0.988	1.53796e-23	0	go-telomere-organization
go-preribosome	2.51936e-27	0.260486	0.92	0.854	1.8807e-23	0	go-preribosome
go-nuclear-transcribed-mrna-catabolic-process-deadenylation-dependent-decay	5.25186e-27	0.360354	0.982	0.932	3.92051e-23	0	go-nuclear-transcribed-mrna-catabolic-process-deadenylation-dependent-decay
go-dna-recombination	7.11371e-27	0.349474	0.984	0.919	5.31039e-23	0	go-dna-recombination
go-telomere-maintenance-via-telomere-lengthening	9.16057e-27	0.339412	0.997	0.94	6.83837e-23	0	go-telomere-maintenance-via-telomere-lengthening
go-nuclear-speck	1.34442e-26	0.278538	1	0.997	1.00361e-22	0	go-nuclear-speck
go-transcription-factor-ap-1-complex	1.50279e-26	0.254828	0.785	0.702	1.12183e-22	0	go-transcription-factor-ap-1-complex
go-ribosome-binding	5.08873e-26	0.317962	0.987	0.92	3.79874e-22	0	go-ribosome-binding
go-protein-methylation	6.59378e-26	0.262241	0.961	0.903	4.92226e-22	0	go-protein-methylation
go-transcription-coregulator-activity	6.25404e-24	0.254362	1	0.997	4.66864e-20	0	go-transcription-coregulator-activity
go-protein-refolding	8.01622e-24	0.276768	0.982	0.937	5.98411e-20	0	go-protein-refolding
go-transferase-complex	1.67383e-23	0.263584	1	0.997	1.24951e-19	0	go-transferase-complex
go-negative-regulation-of-cellular-amide-metabolic-process	3.26986e-23	0.29064	1	0.998	2.44095e-19	0	go-negative-regulation-of-cellular-amide-metabolic-process
go-de-novo-protein-folding	1.10726e-22	0.28629	0.935	0.851	8.26571e-19	0	go-de-novo-protein-folding
go-positive-regulation-of-telomerase-activity	2.52249e-22	0.306849	0.832	0.713	1.88304e-18	0	go-positive-regulation-of-telomerase-activity
go-mitotic-cell-cycle-checkpoint	3.1844e-22	0.333916	0.997	0.983	2.37715e-18	0	go-mitotic-cell-cycle-checkpoint
go-ribosomal-small-subunit-binding	6.30916e-22	0.365962	0.736	0.645	4.70979e-18	0	go-ribosomal-small-subunit-binding
go-immunological-synapse	6.31229e-22	0.280564	0.969	0.9	4.71212e-18	0	go-immunological-synapse
go-single-stranded-dna-binding	9.88596e-22	0.263598	1	0.985	7.37987e-18	0	go-single-stranded-dna-binding
go-regulation-of-telomere-maintenance	4.48151e-21	0.270082	0.987	0.903	3.34545e-17	0	go-regulation-of-telomere-maintenance
go-viral-translation	5.71923e-21	0.330071	0.783	0.701	4.2694e-17	0	go-viral-translation
go-chromatin-binding	5.92806e-21	0.280783	1	0.998	4.4253e-17	0	go-chromatin-binding
go-dna-damage-response-signal-transduction-by-p53-class-mediator	7.46095e-21	0.294362	1	0.977	5.5696e-17	0	go-dna-damage-response-signal-transduction-by-p53-class-mediator
go-positive-regulation-of-telomere-maintenance-via-telomere-lengthening	7.62763e-21	0.278206	0.879	0.78	5.69403e-17	0	go-positive-regulation-of-telomere-maintenance-via-telomere-lengthening
go-regulation-of-cell-cycle-arrest	7.65288e-21	0.304619	0.997	0.971	5.71288e-17	0	go-regulation-of-cell-cycle-arrest
go-response-to-leukemia-inhibitory-factor	7.90229e-21	0.283455	0.997	0.96	5.89906e-17	0	go-response-to-leukemia-inhibitory-factor
go-spindle-pole	9.71811e-21	0.284287	0.992	0.96	7.25457e-17	0	go-spindle-pole
go-chaperone-mediated-protein-folding	1.10101e-20	0.304311	0.969	0.908	8.219e-17	0	go-chaperone-mediated-protein-folding
go-regulation-of-cellular-response-to-heat	1.62919e-20	0.27567	0.958	0.88	1.21619e-16	0	go-regulation-of-cellular-response-to-heat
go-positive-regulation-of-telomere-maintenance	1.69447e-20	0.259769	0.927	0.829	1.26492e-16	0	go-positive-regulation-of-telomere-maintenance
go-microtubule-cytoskeleton	2.72177e-20	0.257912	1	0.998	2.0318e-16	0	go-microtubule-cytoskeleton
go-chromatin-organization	3.5879e-20	0.254229	1	1	2.67836e-16	0	go-chromatin-organization
go-cleavage-involved-in-rrna-processing	3.81537e-20	0.317411	0.679	0.552	2.84817e-16	0	go-cleavage-involved-in-rrna-processing
go-regulation-of-dna-metabolic-process	6.49875e-20	0.286265	1	0.987	4.85132e-16	0	go-regulation-of-dna-metabolic-process
go-nuclear-transcribed-mrna-poly-a-tail-shortening	6.95028e-20	0.371709	0.674	0.627	5.18839e-16	0	go-nuclear-transcribed-mrna-poly-a-tail-shortening
go-negative-regulation-of-lymphocyte-apoptotic-process	9.10778e-20	0.308729	0.84	0.768	6.79896e-16	0	go-negative-regulation-of-lymphocyte-apoptotic-process
go-cytoplasmic-stress-granule	9.96009e-20	0.261943	0.993	0.938	7.4352e-16	0	go-cytoplasmic-stress-granule
go-histone-binding	2.6664e-19	0.264415	0.979	0.943	1.99047e-15	0	go-histone-binding
go-centrosome	2.70186e-19	0.307435	1	0.989	2.01694e-15	0	go-centrosome
go-mrna-3-end-processing	3.77998e-19	0.279723	0.998	0.971	2.82176e-15	0	go-mrna-3-end-processing
go-chaperone-complex	4.12289e-19	0.322274	0.781	0.668	3.07773e-15	0	go-chaperone-complex
go-protein-transmembrane-transport	5.31864e-19	0.278389	0.969	0.875	3.97037e-15	0	go-protein-transmembrane-transport
go-cell-cycle-checkpoint	5.42746e-19	0.29245	0.995	0.982	4.0516e-15	0	go-cell-cycle-checkpoint
go-ncrna-export-from-nucleus	7.99131e-19	0.251402	0.858	0.799	5.96551e-15	0	go-ncrna-export-from-nucleus
go-intracellular-protein-transmembrane-transport	1.13023e-18	0.258727	0.863	0.776	8.43716e-15	0	go-intracellular-protein-transmembrane-transport
go-regulation-of-nuclear-transcribed-mrna-poly-a-tail-shortening	1.58248e-18	0.409523	0.591	0.514	1.18132e-14	0	go-regulation-of-nuclear-transcribed-mrna-poly-a-tail-shortening
go-chaperone-binding	8.37346e-18	0.287334	0.998	0.943	6.25079e-14	0	go-chaperone-binding
go-u2-type-spliceosomal-complex	1.23522e-17	0.278305	0.99	0.956	9.22092e-14	0	go-u2-type-spliceosomal-complex
go-negative-regulation-of-proteasomal-ubiquitin-dependent-protein-catabolic-process	1.61132e-17	0.310654	0.825	0.781	1.20285e-13	0	go-negative-regulation-of-proteasomal-ubiquitin-dependent-protein-catabolic-process
go-heat-shock-protein-binding	1.65162e-17	0.268138	0.998	0.981	1.23294e-13	0	go-heat-shock-protein-binding
go-chemokine-binding	2.38015e-16	0.316834	0.649	0.586	1.77678e-12	0	go-chemokine-binding
go-negative-regulation-of-mrna-splicing-via-spliceosome	9.06489e-16	0.293305	0.825	0.751	6.76694e-12	0	go-negative-regulation-of-mrna-splicing-via-spliceosome
go-ribosomal-small-subunit-export-from-nucleus	1.15308e-15	0.323943	0.542	0.476	8.60771e-12	0	go-ribosomal-small-subunit-export-from-nucleus
go-precatalytic-spliceosome	4.82099e-15	0.259003	0.931	0.874	3.59887e-11	0	go-precatalytic-spliceosome
go-negative-regulation-of-mrna-processing	1.49765e-14	0.255042	0.869	0.788	1.11799e-10	0	go-negative-regulation-of-mrna-processing
go-response-to-heat	1.70158e-14	0.281424	0.998	0.982	1.27023e-10	0	go-response-to-heat
go-chromosomal-region	3.67269e-14	0.257956	0.998	0.978	2.74166e-10	0	go-chromosomal-region
go-transcription-corepressor-activity	4.26813e-14	0.253214	0.989	0.974	3.18616e-10	0	go-transcription-corepressor-activity
go-microtubule-organizing-center	1.27382e-13	0.265812	1	0.987	9.50908e-10	0	go-microtubule-organizing-center
go-regulatory-rna-binding	3.09216e-13	0.260954	0.556	0.517	2.3083e-09	0	go-regulatory-rna-binding
go-negative-regulation-of-t-cell-apoptotic-process	7.01609e-13	0.260605	0.48	0.364	5.23751e-09	0	go-negative-regulation-of-t-cell-apoptotic-process
go-negative-regulation-of-transcription-from-rna-polymerase-ii-promoter-in-response-to-stress	2.48663e-12	0.375788	0.434	0.345	1.85627e-08	0	go-negative-regulation-of-transcription-from-rna-polymerase-ii-promoter-in-response-to-stress
go-v-d-j-recombination	3.37676e-12	0.430414	0.25	0.151	2.52075e-08	0	go-v-d-j-recombination
go-u2-type-catalytic-step-2-spliceosome	5.07453e-12	0.250376	0.84	0.75	3.78814e-08	0	go-u2-type-catalytic-step-2-spliceosome
go-eukaryotic-translation-initiation-factor-3-complex-eif3m	1.02665e-11	0.318295	0.537	0.478	7.66397e-08	0	go-eukaryotic-translation-initiation-factor-3-complex-eif3m
go-sequence-specific-single-stranded-dna-binding	2.22031e-11	0.312963	0.602	0.568	1.65746e-07	0	go-sequence-specific-single-stranded-dna-binding
go-chaperone-mediated-autophagy	2.85368e-11	0.250254	0.638	0.62	2.13027e-07	0	go-chaperone-mediated-autophagy
go-positive-regulation-of-alpha-beta-t-cell-proliferation	3.40216e-11	0.322593	0.633	0.584	2.53972e-07	0	go-positive-regulation-of-alpha-beta-t-cell-proliferation
go-negative-regulation-of-metaphase-anaphase-transition-of-cell-cycle	7.59738e-10	0.301624	0.53	0.503	5.67144e-06	0	go-negative-regulation-of-metaphase-anaphase-transition-of-cell-cycle
go-g-rich-strand-telomeric-dna-binding	7.58527e-08	0.30517	0.401	0.345	0.00056624	0	go-g-rich-strand-telomeric-dna-binding
go-h4-h2a-histone-acetyltransferase-complex	4.70962e-07	0.342967	0.489	0.45	0.00351573	0	go-h4-h2a-histone-acetyltransferase-complex
go-stress-granule-assembly	8.25719e-07	0.333508	0.463	0.422	0.006164	0	go-stress-granule-assembly
go-ires-dependent-viral-translational-initiation	8.38394e-07	0.281605	0.442	0.414	0.00625861	0	go-ires-dependent-viral-translational-initiation
go-dna-polymerase-binding	2.0929e-06	0.303001	0.467	0.438	0.0156235	0	go-dna-polymerase-binding
go-rrna-3-end-processing	4.32728e-05	0.263961	0.302	0.262	0.323031	0	go-rrna-3-end-processing
go-regulation-of-translational-fidelity	0.000610314	0.296202	0.385	0.373	1	0	go-regulation-of-translational-fidelity
go-smn-sm-protein-complex	0.00336987	0.269805	0.37	0.356	1	0	go-smn-sm-protein-complex
go-positive-regulation-by-host-of-viral-transcription	0.00606339	0.303278	0.268	0.246	1	0	go-positive-regulation-by-host-of-viral-transcription
go-t-cell-differentiation1	1.05383e-97	0.556904	1	1	7.86684e-94	1	go-t-cell-differentiation
go-lymphocyte-differentiation	6.07895e-81	0.40445	1	1	4.53794e-77	1	go-lymphocyte-differentiation
go-t-cell-receptor-complex1	4.03257e-67	0.696402	0.902	0.48	3.01031e-63	1	go-t-cell-receptor-complex
go-regulation-of-lymphocyte-differentiation	9.72482e-66	0.518166	1	0.99	7.25958e-62	1	go-regulation-of-lymphocyte-differentiation
go-negative-regulation-of-t-cell-apoptotic-process1	2.26495e-65	0.462213	0.725	0.305	1.69079e-61	1	go-negative-regulation-of-t-cell-apoptotic-process
go-t-cell-selection1	1.24748e-64	0.65185	0.995	0.867	9.31243e-61	1	go-t-cell-selection
go-alpha-beta-t-cell-receptor-complex1	4.05911e-64	0.827395	0.64	0.218	3.03013e-60	1	go-alpha-beta-t-cell-receptor-complex
go-positive-t-cell-selection1	7.94196e-63	0.664634	0.98	0.713	5.92867e-59	1	go-positive-t-cell-selection
go-regulation-of-t-cell-differentiation	2.23235e-62	0.603194	1	0.977	1.66645e-58	1	go-regulation-of-t-cell-differentiation
go-t-cell-receptor-binding1	3.65032e-62	0.751694	0.756	0.3	2.72496e-58	1	go-t-cell-receptor-binding
go-t-cell-differentiation-in-thymus1	2.64774e-61	0.563569	1	0.969	1.97654e-57	1	go-t-cell-differentiation-in-thymus
go-thymic-t-cell-selection1	2.00319e-60	0.611898	0.958	0.589	1.49538e-56	1	go-thymic-t-cell-selection
go-positive-thymic-t-cell-selection1	6.83394e-60	0.629906	0.918	0.516	5.10154e-56	1	go-positive-thymic-t-cell-selection
go-regulation-of-cell-cycle	1.27861e-55	0.263825	1	1	9.54485e-52	1	go-regulation-of-cell-cycle
go-cell-cycle	1.06212e-54	0.260047	1	1	7.92876e-51	1	go-cell-cycle
go-t-cell-activation	2.4953e-51	0.256098	1	1	1.86274e-47	1	go-t-cell-activation
go-interleukin-7-mediated-signaling-pathway	4.82056e-49	0.275631	0.478	0.17	3.59855e-45	1	go-interleukin-7-mediated-signaling-pathway
go-negative-regulation-of-lymphocyte-apoptotic-process1	3.86852e-47	0.535102	0.964	0.738	2.88785e-43	1	go-negative-regulation-of-lymphocyte-apoptotic-process
go-alpha-beta-t-cell-activation	1.93666e-45	0.539477	1	0.967	1.44571e-41	1	go-alpha-beta-t-cell-activation
go-cell-cycle-process	4.02572e-45	0.26045	1	1	3.0052e-41	1	go-cell-cycle-process
go-positive-regulation-of-t-cell-receptor-signaling-pathway1	2.54815e-43	0.59954	0.615	0.273	1.9022e-39	1	go-positive-regulation-of-t-cell-receptor-signaling-pathway
go-response-to-interleukin-7	9.02744e-43	0.397907	0.785	0.44	6.73898e-39	1	go-response-to-interleukin-7
go-phosphatidylinositol-3-kinase-binding1	1.25712e-42	0.501082	0.951	0.697	9.38438e-39	1	go-phosphatidylinositol-3-kinase-binding
go-regulation-of-t-cell-differentiation-in-thymus	3.32058e-42	0.305453	0.447	0.171	2.47882e-38	1	go-regulation-of-t-cell-differentiation-in-thymus
go-mitotic-cell-cycle	8.84745e-42	0.260746	1	1	6.60462e-38	1	go-mitotic-cell-cycle
go-regulation-of-cell-cycle-process	2.3468e-41	0.259588	1	1	1.75188e-37	1	go-regulation-of-cell-cycle-process
go-lymph-node-development	5.86297e-41	0.275488	0.313	0.087	4.3767e-37	1	go-lymph-node-development
go-negative-t-cell-selection1	1.04691e-38	0.534891	0.711	0.36	7.8152e-35	1	go-negative-t-cell-selection
go-tumor-necrosis-factor-receptor-binding	8.02966e-38	0.362741	0.6	0.314	5.99414e-34	1	go-tumor-necrosis-factor-receptor-binding
go-negative-regulation-of-cell-cycle	3.59583e-37	0.257805	1	1	2.68429e-33	1	go-negative-regulation-of-cell-cycle
go-ribonucleotide-binding	3.83827e-36	0.32007	1	0.997	2.86527e-32	1	go-ribonucleotide-binding
go-dna-metabolic-process1	4.30745e-36	0.266295	1	1	3.21551e-32	1	go-dna-metabolic-process
go-positive-regulation-of-rna-biosynthetic-process	1.72483e-35	0.265896	1	1	1.28758e-31	1	go-positive-regulation-of-rna-biosynthetic-process
go-phosphatase-activator-activity	1.68311e-34	0.476882	0.736	0.447	1.25644e-30	1	go-phosphatase-activator-activity
go-response-to-topologically-incorrect-protein	5.14035e-34	0.426323	1	0.982	3.83727e-30	1	go-response-to-topologically-incorrect-protein
go-positive-regulation-of-camp-mediated-signaling	6.5075e-34	0.279331	0.547	0.285	4.85785e-30	1	go-positive-regulation-of-camp-mediated-signaling
go-protein-phosphatase-activator-activity	7.81468e-34	0.500883	0.704	0.423	5.83366e-30	1	go-protein-phosphatase-activator-activity
go-regulation-of-leukocyte-differentiation	2.56935e-33	0.308627	1	0.999	1.91802e-29	1	go-regulation-of-leukocyte-differentiation
go-positive-regulation-of-calcium-mediated-signaling	5.12271e-33	0.457942	0.985	0.817	3.8241e-29	1	go-positive-regulation-of-calcium-mediated-signaling
go-positive-regulation-of-hemopoiesis	8.90006e-32	0.297555	1	0.997	6.6439e-28	1	go-positive-regulation-of-hemopoiesis
go-transferase-complex1	3.08455e-31	0.296799	1	0.997	2.30261e-27	1	go-transferase-complex
go-positive-regulation-of-interleukin-2-production	4.43112e-31	0.426768	0.944	0.707	3.30783e-27	1	go-positive-regulation-of-interleukin-2-production
go-negative-regulation-of-transcription-from-rna-polymerase-ii-promoter-in-response-to-stress1	7.65859e-31	0.494466	0.584	0.309	5.71714e-27	1	go-negative-regulation-of-transcription-from-rna-polymerase-ii-promoter-in-response-to-stress
go-microtubule-cytoskeleton1	1.24327e-30	0.306969	1	0.998	9.28101e-27	1	go-microtubule-cytoskeleton
go-positive-regulation-of-lymphocyte-differentiation	1.94783e-30	0.540291	0.998	0.945	1.45405e-26	1	go-positive-regulation-of-lymphocyte-differentiation
go-positive-regulation-of-transcription-by-rna-polymerase-ii	4.87146e-30	0.270043	1	0.998	3.63654e-26	1	go-positive-regulation-of-transcription-by-rna-polymerase-ii
go-tumor-necrosis-factor-receptor-superfamily-binding	1.47759e-29	0.280122	0.78	0.487	1.10302e-25	1	go-tumor-necrosis-factor-receptor-superfamily-binding
go-unfolded-protein-binding1	1.97905e-29	0.30587	1	0.991	1.47736e-25	1	go-unfolded-protein-binding
go-regulation-of-endoplasmic-reticulum-unfolded-protein-response	3.57916e-29	0.442147	0.627	0.379	2.67184e-25	1	go-regulation-of-endoplasmic-reticulum-unfolded-protein-response
go-positive-regulation-of-leukocyte-differentiation	1.20412e-28	0.296982	0.998	0.996	8.98872e-25	1	go-positive-regulation-of-leukocyte-differentiation
go-positive-regulation-of-antigen-receptor-mediated-signaling-pathway1	1.3131e-28	0.429219	0.869	0.628	9.80232e-25	1	go-positive-regulation-of-antigen-receptor-mediated-signaling-pathway
go-positive-regulation-of-dna-templated-transcription-initiation	1.47286e-28	0.362639	0.664	0.4	1.09949e-24	1	go-positive-regulation-of-dna-templated-transcription-initiation
go-adenyl-nucleotide-binding	3.18503e-28	0.388606	1	0.986	2.37762e-24	1	go-adenyl-nucleotide-binding
go-negative-regulation-of-interleukin-2-production	6.86797e-28	0.383211	0.533	0.299	5.12694e-24	1	go-negative-regulation-of-interleukin-2-production
go-chaperone-binding1	1.00052e-27	0.419776	0.996	0.945	7.4689e-24	1	go-chaperone-binding
go-positive-regulation-of-phosphoprotein-phosphatase-activity	3.78977e-27	0.336744	0.9	0.627	2.82907e-23	1	go-positive-regulation-of-phosphoprotein-phosphatase-activity
go-v-d-j-recombination1	6.05564e-27	0.410405	0.336	0.132	4.52054e-23	1	go-v-d-j-recombination
go-chemokine-binding1	6.42143e-27	0.345803	0.813	0.546	4.7936e-23	1	go-chemokine-binding
go-nitric-oxide-synthase-regulator-activity	1.31786e-26	0.433001	0.7	0.429	9.83786e-23	1	go-nitric-oxide-synthase-regulator-activity
go-peptidyl-amino-acid-modification	2.42127e-26	0.292239	1	0.998	1.80748e-22	1	go-peptidyl-amino-acid-modification
go-intracellular-receptor-signaling-pathway	2.84353e-26	0.293139	1	0.997	2.12269e-22	1	go-intracellular-receptor-signaling-pathway
go-centrosome1	1.0563e-25	0.375519	1	0.99	7.88526e-22	1	go-centrosome
go-alpha-beta-t-cell-differentiation	1.71331e-25	0.562507	0.991	0.896	1.27899e-21	1	go-alpha-beta-t-cell-differentiation
go-misfolded-protein-binding	3.38528e-25	0.316106	0.485	0.264	2.52711e-21	1	go-misfolded-protein-binding
go-regulation-of-t-cell-apoptotic-process	6.4216e-25	0.37633	0.873	0.636	4.79372e-21	1	go-regulation-of-t-cell-apoptotic-process
go-microtubule-organizing-center1	1.36173e-24	0.393044	1	0.987	1.01653e-20	1	go-microtubule-organizing-center
go-immunological-synapse1	3.18148e-24	0.315121	0.993	0.896	2.37497e-20	1	go-immunological-synapse
go-response-to-x-ray	3.52299e-24	0.343222	0.576	0.36	2.62991e-20	1	go-response-to-x-ray
go-receptor-tyrosine-kinase-binding	7.48671e-24	0.260166	0.805	0.529	5.58883e-20	1	go-receptor-tyrosine-kinase-binding
go-negative-regulation-of-t-cell-differentiation	1.11842e-23	0.406471	0.905	0.679	8.34899e-20	1	go-negative-regulation-of-t-cell-differentiation
go-response-to-interleukin-41	1.12169e-23	0.326841	0.991	0.877	8.37345e-20	1	go-response-to-interleukin-4
go-protein-transmembrane-transport1	2.85967e-23	0.39733	0.989	0.873	2.13474e-19	1	go-protein-transmembrane-transport
go-chaperone-complex1	3.32268e-23	0.372559	0.876	0.647	2.48038e-19	1	go-chaperone-complex
go-regulation-of-dna-metabolic-process1	5.47737e-23	0.329261	1	0.987	4.08886e-19	1	go-regulation-of-dna-metabolic-process
go-myelin-sheath	8.87314e-23	0.428544	0.976	0.78	6.6238e-19	1	go-myelin-sheath
go-cell-cycle-g2-m-phase-transition	1.41578e-22	0.262873	1	0.998	1.05688e-18	1	go-cell-cycle-g2-m-phase-transition
go-regulation-of-chromosome-organization	1.91993e-22	0.346994	1	0.987	1.43323e-18	1	go-regulation-of-chromosome-organization
go-regulation-of-b-cell-differentiation	2.4986e-22	0.350994	0.873	0.633	1.8652e-18	1	go-regulation-of-b-cell-differentiation
go-cell-division	3.11924e-22	0.250839	1	0.999	2.32851e-18	1	go-cell-division
go-cellular-response-to-steroid-hormone-stimulus	3.14157e-22	0.344531	1	0.986	2.34518e-18	1	go-cellular-response-to-steroid-hormone-stimulus
go-negative-regulation-of-phosphorylation	5.34401e-22	0.268738	1	0.998	3.9893e-18	1	go-negative-regulation-of-phosphorylation
go-protein-n-terminus-binding	7.52643e-22	0.328034	1	0.976	5.61848e-18	1	go-protein-n-terminus-binding
go-membrane-raft-organization	1.10117e-21	0.339816	0.735	0.503	8.22021e-18	1	go-membrane-raft-organization
go-cellular-response-to-oxygen-radical	1.15811e-21	0.30967	0.584	0.37	8.64529e-18	1	go-cellular-response-to-oxygen-radical
go-tolerance-induction	1.23452e-21	0.317426	0.867	0.61	9.21566e-18	1	go-tolerance-induction
go-negative-regulation-of-leukocyte-apoptotic-process	2.50885e-21	0.374976	0.991	0.892	1.87286e-17	1	go-negative-regulation-of-leukocyte-apoptotic-process
go-disordered-domain-specific-binding	3.26345e-21	0.323287	0.98	0.824	2.43617e-17	1	go-disordered-domain-specific-binding
go-regulation-of-stem-cell-differentiation	4.23582e-21	0.288109	1	0.98	3.16204e-17	1	go-regulation-of-stem-cell-differentiation
go-au-rich-element-binding	7.01525e-21	0.318379	0.816	0.574	5.23688e-17	1	go-au-rich-element-binding
go-drug-binding	7.03724e-21	0.394894	1	0.972	5.2533e-17	1	go-drug-binding
go-heat-shock-protein-binding1	1.43106e-20	0.318163	1	0.981	1.06829e-16	1	go-heat-shock-protein-binding
go-response-to-oxygen-radical	1.67338e-20	0.336631	0.731	0.512	1.24918e-16	1	go-response-to-oxygen-radical
go-maintenance-of-protein-location-in-nucleus	1.70759e-20	0.277719	0.671	0.432	1.27472e-16	1	go-maintenance-of-protein-location-in-nucleus
go-dna-recombination1	1.7357e-20	0.5385	0.993	0.919	1.2957e-16	1	go-dna-recombination
go-negative-regulation-of-dna-damage-response-signal-transduction-by-p53-class-mediator	2.09981e-20	0.37032	0.447	0.251	1.56751e-16	1	go-negative-regulation-of-dna-damage-response-signal-transduction-by-p53-class-mediator
go-transcription-coactivator-activity	2.25535e-20	0.305928	1	0.992	1.68362e-16	1	go-transcription-coactivator-activity
go-regulation-of-cell-communication-by-electrical-coupling	3.04322e-20	0.396392	0.442	0.253	2.27177e-16	1	go-regulation-of-cell-communication-by-electrical-coupling
go-regulation-of-dna-templated-transcription-initiation	3.26178e-20	0.32499	0.902	0.668	2.43492e-16	1	go-regulation-of-dna-templated-transcription-initiation
go-chaperone-mediated-protein-complex-assembly	5.27728e-20	0.262717	0.667	0.429	3.93949e-16	1	go-chaperone-mediated-protein-complex-assembly
go-regulation-of-transcription-initiation-from-rna-polymerase-ii-promoter	5.74897e-20	0.321507	0.68	0.462	4.2916e-16	1	go-regulation-of-transcription-initiation-from-rna-polymerase-ii-promoter
go-somatic-diversification-of-immune-receptors-via-germline-recombination-within-a-single-locus	6.22919e-20	0.37021	0.936	0.708	4.65009e-16	1	go-somatic-diversification-of-immune-receptors-via-germline-recombination-within-a-single-locus
go-negative-regulation-of-calcium-ion-transport-into-cytosol	6.64947e-20	0.282854	0.776	0.551	4.96383e-16	1	go-negative-regulation-of-calcium-ion-transport-into-cytosol
go-regulation-of-cell-communication-by-electrical-coupling-involved-in-cardiac-conduction	1.31605e-19	0.406205	0.433	0.248	9.82435e-16	1	go-regulation-of-cell-communication-by-electrical-coupling-involved-in-cardiac-conduction
go-nuclear-envelope	1.58889e-19	0.279718	1	0.995	1.1861e-15	1	go-nuclear-envelope
go-protein-localization-to-chromosome-telomeric-region	2.61247e-19	0.344854	0.716	0.501	1.95021e-15	1	go-protein-localization-to-chromosome-telomeric-region
go-interleukin-2-production	3.89249e-19	0.373093	0.998	0.931	2.90574e-15	1	go-interleukin-2-production
go-protein-self-association	4.08146e-19	0.312883	0.833	0.594	3.04681e-15	1	go-protein-self-association
go-cell-cell-adhesion-mediated-by-integrin	4.30844e-19	0.345491	0.364	0.186	3.21625e-15	1	go-cell-cell-adhesion-mediated-by-integrin
go-rna-dependent-dna-biosynthetic-process1	4.3272e-19	0.298524	0.996	0.941	3.23026e-15	1	go-rna-dependent-dna-biosynthetic-process
go-negative-regulation-of-lymphocyte-differentiation	5.24212e-19	0.40492	0.94	0.751	3.91325e-15	1	go-negative-regulation-of-lymphocyte-differentiation
go-chaperone-mediated-autophagy1	6.45822e-19	0.298476	0.827	0.572	4.82106e-15	1	go-chaperone-mediated-autophagy
go-positive-regulation-of-telomerase-activity1	7.28315e-19	0.318919	0.909	0.697	5.43687e-15	1	go-positive-regulation-of-telomerase-activity
go-stem-cell-differentiation	7.71788e-19	0.317359	1	0.987	5.7614e-15	1	go-stem-cell-differentiation
go-positive-regulation-of-mrna-catabolic-process1	8.25703e-19	0.341273	0.978	0.859	6.16387e-15	1	go-positive-regulation-of-mrna-catabolic-process
go-positive-regulation-of-dna-biosynthetic-process1	9.33601e-19	0.346677	0.996	0.92	6.96933e-15	1	go-positive-regulation-of-dna-biosynthetic-process
go-rna-polymerase-ii-preinitiation-complex-assembly	1.02642e-18	0.295252	0.695	0.472	7.66226e-15	1	go-rna-polymerase-ii-preinitiation-complex-assembly
go-atpase-activity-coupled	1.13018e-18	0.357449	1	0.99	8.43682e-15	1	go-atpase-activity-coupled
go-regulation-of-cyclic-nucleotide-phosphodiesterase-activity	1.20454e-18	0.413108	0.384	0.213	8.9919e-15	1	go-regulation-of-cyclic-nucleotide-phosphodiesterase-activity
go-telomere-maintenance-via-telomere-lengthening1	1.32944e-18	0.30846	0.996	0.941	9.92427e-15	1	go-telomere-maintenance-via-telomere-lengthening
go-calcium-dependent-protein-binding	1.5192e-18	0.266527	1	0.953	1.13408e-14	1	go-calcium-dependent-protein-binding
go-microtubule-based-process	1.96571e-18	0.355008	0.998	0.986	1.4674e-14	1	go-microtubule-based-process
go-poly-purine-tract-binding	1.99698e-18	0.300139	0.785	0.567	1.49075e-14	1	go-poly-purine-tract-binding
go-negative-regulation-of-i-kappab-kinase-nf-kappab-signaling	2.62797e-18	0.385409	0.796	0.616	1.96178e-14	1	go-negative-regulation-of-i-kappab-kinase-nf-kappab-signaling
go-response-to-endoplasmic-reticulum-stress	2.7157e-18	0.253947	1	0.997	2.02727e-14	1	go-response-to-endoplasmic-reticulum-stress
go-regulation-of-protein-autophosphorylation	2.94587e-18	0.334326	0.945	0.712	2.19909e-14	1	go-regulation-of-protein-autophosphorylation
go-gtp-metabolic-process	3.22139e-18	0.376491	0.442	0.256	2.40477e-14	1	go-gtp-metabolic-process
go-alpha-beta-t-cell-proliferation	4.84176e-18	0.283571	0.915	0.673	3.61437e-14	1	go-alpha-beta-t-cell-proliferation
go-negative-regulation-of-response-to-endoplasmic-reticulum-stress	6.94564e-18	0.378063	0.938	0.782	5.18492e-14	1	go-negative-regulation-of-response-to-endoplasmic-reticulum-stress
go-hematopoietic-stem-cell-differentiation	8.68948e-18	0.257376	1	0.968	6.4867e-14	1	go-hematopoietic-stem-cell-differentiation
go-regulation-of-t-cell-receptor-signaling-pathway	2.84559e-17	0.364232	0.929	0.755	2.12423e-13	1	go-regulation-of-t-cell-receptor-signaling-pathway
go-protein-folding-chaperone	2.93258e-17	0.289251	0.805	0.587	2.18917e-13	1	go-protein-folding-chaperone
go-modulation-of-signal-transduction-in-other-organism	3.13105e-17	0.451297	0.355	0.195	2.33733e-13	1	go-modulation-of-signal-transduction-in-other-organism
go-er-nucleus-signaling-pathway	3.46276e-17	0.343809	0.831	0.627	2.58495e-13	1	go-er-nucleus-signaling-pathway
go-chaperone-cofactor-dependent-protein-refolding1	3.99993e-17	0.29261	0.924	0.746	2.98595e-13	1	go-chaperone-cofactor-dependent-protein-refolding
go-rna-destabilization	4.99748e-17	0.284584	0.749	0.542	3.73062e-13	1	go-rna-destabilization
go-atpase-activity	5.78076e-17	0.389929	1	0.987	4.31534e-13	1	go-atpase-activity
go-regulation-of-telomerase-activity	7.0843e-17	0.338716	0.922	0.727	5.28843e-13	1	go-regulation-of-telomerase-activity
go-intracellular-protein-transmembrane-transport1	8.45127e-17	0.35989	0.924	0.763	6.30887e-13	1	go-intracellular-protein-transmembrane-transport
go-cop9-signalosome	1.09211e-16	0.322052	0.698	0.511	8.15259e-13	1	go-cop9-signalosome
go-response-to-bronchodilator1	1.16283e-16	0.281387	0.869	0.645	8.68054e-13	1	go-response-to-bronchodilator
go-regulation-of-intracellular-protein-transport	1.44095e-16	0.26032	1	0.997	1.07567e-12	1	go-regulation-of-intracellular-protein-transport
go-establishment-of-protein-localization-to-mitochondrial-membrane	1.49893e-16	0.257918	0.865	0.619	1.11895e-12	1	go-establishment-of-protein-localization-to-mitochondrial-membrane
go-positive-regulation-of-sequestering-of-calcium-ion	1.84524e-16	0.273988	0.585	0.387	1.37747e-12	1	go-positive-regulation-of-sequestering-of-calcium-ion
go-regulation-of-cell-cell-adhesion-mediated-by-integrin	2.0314e-16	0.368956	0.278	0.132	1.51644e-12	1	go-regulation-of-cell-cell-adhesion-mediated-by-integrin
go-dendritic-cell-migration	2.8204e-16	0.281077	0.785	0.572	2.10543e-12	1	go-dendritic-cell-migration
go-regulation-of-translation-in-response-to-stress	3.02798e-16	0.268123	0.711	0.503	2.26039e-12	1	go-regulation-of-translation-in-response-to-stress
go-guanosine-containing-compound-metabolic-process	4.24831e-16	0.291551	0.74	0.537	3.17136e-12	1	go-guanosine-containing-compound-metabolic-process
go-negative-regulation-of-ryanodine-sensitive-calcium-release-channel-activity	4.33743e-16	0.350594	0.52	0.341	3.23789e-12	1	go-negative-regulation-of-ryanodine-sensitive-calcium-release-channel-activity
go-regulation-of-translational-initiation-in-response-to-stress	4.3624e-16	0.33767	0.635	0.441	3.25653e-12	1	go-regulation-of-translational-initiation-in-response-to-stress
go-proteasome-accessory-complex	5.73098e-16	0.318816	0.907	0.715	4.27818e-12	1	go-proteasome-accessory-complex
go-telomerase-holoenzyme-complex-assembly	9.54913e-16	0.394453	0.327	0.168	7.12842e-12	1	go-telomerase-holoenzyme-complex-assembly
go-protein-serine-threonine-kinase-activator-activity	1.02239e-15	0.271322	0.771	0.56	7.63215e-12	1	go-protein-serine-threonine-kinase-activator-activity
go-positive-regulation-of-cell-cycle1	1.29539e-15	0.289361	1	0.995	9.67012e-12	1	go-positive-regulation-of-cell-cycle
go-poly-a-binding	1.5504e-15	0.264871	0.72	0.517	1.15738e-11	1	go-poly-a-binding
go-catalytic-activity-acting-on-rna	1.70269e-15	0.316045	1	0.978	1.27106e-11	1	go-catalytic-activity-acting-on-rna
go-chaperone-mediated-protein-folding1	1.82396e-15	0.306247	0.989	0.904	1.36159e-11	1	go-chaperone-mediated-protein-folding
go-oligosaccharyltransferase-complex	1.91856e-15	0.333845	0.66	0.448	1.4322e-11	1	go-oligosaccharyltransferase-complex
go-regulation-of-dna-biosynthetic-process1	2.28138e-15	0.289938	1	0.968	1.70305e-11	1	go-regulation-of-dna-biosynthetic-process
go-positive-regulation-of-response-to-endoplasmic-reticulum-stress	2.53947e-15	0.281218	0.725	0.523	1.89571e-11	1	go-positive-regulation-of-response-to-endoplasmic-reticulum-stress
go-positive-regulation-of-alpha-beta-t-cell-activation	3.67065e-15	0.370409	0.996	0.877	2.74014e-11	1	go-positive-regulation-of-alpha-beta-t-cell-activation
go-positive-regulation-of-phosphatase-activity	5.03174e-15	0.253922	0.916	0.687	3.75619e-11	1	go-positive-regulation-of-phosphatase-activity
go-protein-serine-threonine-phosphatase-complex	8.7521e-15	0.347186	0.853	0.666	6.53345e-11	1	go-protein-serine-threonine-phosphatase-complex
go-regulation-of-lymphocyte-apoptotic-process	9.11743e-15	0.296612	0.995	0.916	6.80616e-11	1	go-regulation-of-lymphocyte-apoptotic-process
go-positive-regulation-of-oxidative-stress-induced-cell-death	9.35008e-15	0.287153	0.356	0.206	6.97983e-11	1	go-positive-regulation-of-oxidative-stress-induced-cell-death
go-positive-regulation-of-oxidative-stress-induced-intrinsic-apoptotic-signaling-pathway	1.52436e-14	0.399176	0.309	0.17	1.13793e-10	1	go-positive-regulation-of-oxidative-stress-induced-intrinsic-apoptotic-signaling-pathway
go-mitotic-cell-cycle-arrest	1.80397e-14	0.28918	0.307	0.162	1.34667e-10	1	go-mitotic-cell-cycle-arrest
go-adenylate-cyclase-binding	2.39155e-14	0.329129	0.504	0.333	1.78529e-10	1	go-adenylate-cyclase-binding
go-multi-organism-cellular-process	2.9483e-14	0.269823	0.825	0.607	2.20091e-10	1	go-multi-organism-cellular-process
go-protein-dephosphorylation	3.62602e-14	0.277636	1	0.993	2.70682e-10	1	go-protein-dephosphorylation
go-regulation-of-rna-polymerase-ii-transcriptional-preinitiation-complex-assembly	3.99601e-14	0.304699	0.395	0.234	2.98302e-10	1	go-regulation-of-rna-polymerase-ii-transcriptional-preinitiation-complex-assembly
go-positive-regulation-of-ryanodine-sensitive-calcium-release-channel-activity	4.44927e-14	0.357251	0.402	0.253	3.32138e-10	1	go-positive-regulation-of-ryanodine-sensitive-calcium-release-channel-activity
go-spindle	4.67196e-14	0.266989	1	0.999	3.48762e-10	1	go-spindle
go-positive-regulation-of-rna-metabolic-process	7.85e-14	0.289477	1	0.948	5.86002e-10	1	go-positive-regulation-of-rna-metabolic-process
go-regulation-of-alpha-beta-t-cell-activation	9.72513e-14	0.374194	1	0.948	7.25981e-10	1	go-regulation-of-alpha-beta-t-cell-activation
go-adenylate-cyclase-activator-activity	1.08528e-13	0.39566	0.427	0.277	8.10164e-10	1	go-adenylate-cyclase-activator-activity
go-cellular-response-to-topologically-incorrect-protein	1.62314e-13	0.379887	0.995	0.953	1.21168e-09	1	go-cellular-response-to-topologically-incorrect-protein
go-eukaryotic-translation-initiation-factor-4f-complex	1.90696e-13	0.312438	0.602	0.408	1.42355e-09	1	go-eukaryotic-translation-initiation-factor-4f-complex
go-t-cell-apoptotic-process	2.31959e-13	0.323691	0.94	0.738	1.73158e-09	1	go-t-cell-apoptotic-process
go-tau-protein-binding	2.32693e-13	0.30978	0.92	0.752	1.73705e-09	1	go-tau-protein-binding
go-intrinsic-apoptotic-signaling-pathway-in-response-to-oxidative-stress	3.1879e-13	0.310526	0.929	0.735	2.37977e-09	1	go-intrinsic-apoptotic-signaling-pathway-in-response-to-oxidative-stress
go-regulation-of-telomere-maintenance1	3.39989e-13	0.321854	0.991	0.904	2.53802e-09	1	go-regulation-of-telomere-maintenance
go-mitotic-nuclear-division	4.28734e-13	0.338259	0.998	0.983	3.2005e-09	1	go-mitotic-nuclear-division
go-de-novo-protein-folding1	4.80201e-13	0.275872	0.967	0.845	3.5847e-09	1	go-de-novo-protein-folding
go-nucleoside-monophosphate-biosynthetic-process	4.80684e-13	0.301825	0.802	0.619	3.58831e-09	1	go-nucleoside-monophosphate-biosynthetic-process
go-titin-binding	6.01248e-13	0.303694	0.278	0.153	4.48832e-09	1	go-titin-binding
go-cell-cycle-arrest	6.66298e-13	0.250238	1	0.997	4.97392e-09	1	go-cell-cycle-arrest
go-mitogen-activated-protein-kinase-binding	7.00356e-13	0.286973	0.742	0.565	5.22815e-09	1	go-mitogen-activated-protein-kinase-binding
go-amide-transmembrane-transporter-activity	7.87348e-13	0.282413	0.833	0.634	5.87755e-09	1	go-amide-transmembrane-transporter-activity
go-regulation-of-nuclear-transcribed-mrna-poly-a-tail-shortening1	7.9195e-13	0.284047	0.689	0.491	5.91191e-09	1	go-regulation-of-nuclear-transcribed-mrna-poly-a-tail-shortening
go-regulation-of-response-to-endoplasmic-reticulum-stress	8.70093e-13	0.318622	0.998	0.931	6.49524e-09	1	go-regulation-of-response-to-endoplasmic-reticulum-stress
go-positive-regulation-of-developmental-process	9.07699e-13	0.253844	1	0.997	6.77597e-09	1	go-positive-regulation-of-developmental-process
go-positive-regulation-of-cyclic-nucleotide-phosphodiesterase-activity	9.87833e-13	0.387146	0.258	0.14	7.37417e-09	1	go-positive-regulation-of-cyclic-nucleotide-phosphodiesterase-activity
go-supercoiled-dna-binding	1.01121e-12	0.339781	0.491	0.309	7.54866e-09	1	go-supercoiled-dna-binding
go-peroxiredoxin-activity	1.03661e-12	0.357738	0.436	0.291	7.73827e-09	1	go-peroxiredoxin-activity
go-viral-latency	1.11044e-12	0.322928	0.515	0.339	8.28945e-09	1	go-viral-latency
go-regulation-of-oxidative-stress-induced-intrinsic-apoptotic-signaling-pathway	1.155e-12	0.26961	0.769	0.58	8.62205e-09	1	go-regulation-of-oxidative-stress-induced-intrinsic-apoptotic-signaling-pathway
go-lymphocyte-apoptotic-process	1.18893e-12	0.315525	0.998	0.932	8.87534e-09	1	go-lymphocyte-apoptotic-process
go-precatalytic-spliceosome1	1.40292e-12	0.258628	0.978	0.863	1.04728e-08	1	go-precatalytic-spliceosome
go-positive-regulation-of-protein-dephosphorylation	1.40443e-12	0.300672	0.962	0.786	1.04841e-08	1	go-positive-regulation-of-protein-dephosphorylation
go-establishment-of-viral-latency	1.44478e-12	0.33175	0.442	0.282	1.07853e-08	1	go-establishment-of-viral-latency
go-protein-containing-complex-scaffold-activity	2.33989e-12	0.397818	0.989	0.878	1.74673e-08	1	go-protein-containing-complex-scaffold-activity
go-somatic-diversification-of-immune-receptors	3.37037e-12	0.331198	0.951	0.759	2.51598e-08	1	go-somatic-diversification-of-immune-receptors
go-positive-regulation-of-chromosome-organization	4.34339e-12	0.349113	0.993	0.963	3.24234e-08	1	go-positive-regulation-of-chromosome-organization
go-heterotypic-cell-cell-adhesion	4.36953e-12	0.259977	0.884	0.678	3.26185e-08	1	go-heterotypic-cell-cell-adhesion
go-detection-of-calcium-ion	5.01286e-12	0.310081	0.284	0.162	3.7421e-08	1	go-detection-of-calcium-ion
go-ubiquitin-dependent-erad-pathway	6.20981e-12	0.358289	0.927	0.762	4.63562e-08	1	go-ubiquitin-dependent-erad-pathway
go-regulation-of-telomere-maintenance-via-telomere-lengthening	7.36747e-12	0.307053	0.98	0.862	5.49981e-08	1	go-regulation-of-telomere-maintenance-via-telomere-lengthening
go-general-transcription-initiation-factor-binding	8.2223e-12	0.273335	0.847	0.665	6.13795e-08	1	go-general-transcription-initiation-factor-binding
go-3-utr-mediated-mrna-destabilization	9.75368e-12	0.254558	0.458	0.294	7.28112e-08	1	go-3-utr-mediated-mrna-destabilization
go-organelle-fission	1.08042e-11	0.349798	0.998	0.974	8.06533e-08	1	go-organelle-fission
go-proteasome-regulatory-particle-base-subcomplex	1.08071e-11	0.345756	0.313	0.188	8.06751e-08	1	go-proteasome-regulatory-particle-base-subcomplex
go-negative-regulation-of-b-cell-apoptotic-process	1.36667e-11	0.307221	0.304	0.178	1.02022e-07	1	go-negative-regulation-of-b-cell-apoptotic-process
go-intramolecular-oxidoreductase-activity	1.39216e-11	0.284391	0.856	0.681	1.03925e-07	1	go-intramolecular-oxidoreductase-activity
go-regulation-of-animal-organ-morphogenesis	1.45426e-11	0.26572	1	0.99	1.08561e-07	1	go-regulation-of-animal-organ-morphogenesis
go-mrna-3-utr-au-rich-region-binding	1.49933e-11	0.285509	0.416	0.261	1.11925e-07	1	go-mrna-3-utr-au-rich-region-binding
go-cytokinesis	1.67432e-11	0.292369	1	0.984	1.24988e-07	1	go-cytokinesis
go-signaling-adaptor-activity	1.7462e-11	0.319565	0.862	0.673	1.30354e-07	1	go-signaling-adaptor-activity
go-positive-regulation-of-telomere-maintenance1	1.84178e-11	0.287717	0.962	0.823	1.37489e-07	1	go-positive-regulation-of-telomere-maintenance
go-dna-damage-response-signal-transduction-by-p53-class-mediator1	1.95163e-11	0.305677	0.998	0.978	1.45689e-07	1	go-dna-damage-response-signal-transduction-by-p53-class-mediator
go-cd4-positive-alpha-beta-t-cell-activation	2.19654e-11	0.437329	0.967	0.806	1.63972e-07	1	go-cd4-positive-alpha-beta-t-cell-activation
go-endoplasmic-reticulum-chaperone-complex	4.10453e-11	0.335474	0.325	0.199	3.06403e-07	1	go-endoplasmic-reticulum-chaperone-complex
go-protein-tyrosine-kinase-binding	5.3518e-11	0.35597	0.947	0.737	3.99512e-07	1	go-protein-tyrosine-kinase-binding
go-u4-snrnp	8.32017e-11	0.282297	0.427	0.273	6.21101e-07	1	go-u4-snrnp
go-response-to-heat1	9.61243e-11	0.296208	0.998	0.983	7.17568e-07	1	go-response-to-heat
go-cd4-receptor-binding	1.13968e-10	0.318929	0.36	0.227	8.50771e-07	1	go-cd4-receptor-binding
go-chromosomal-region1	1.23882e-10	0.275276	0.998	0.979	9.24776e-07	1	go-chromosomal-region
go-molecular-adaptor-activity	1.78874e-10	0.4083	0.995	0.955	1.3353e-06	1	go-molecular-adaptor-activity
go-t-cell-differentiation-involved-in-immune-response	1.81517e-10	0.295761	0.929	0.737	1.35503e-06	1	go-t-cell-differentiation-involved-in-immune-response
go-protein-localization-to-chromosome	2.55558e-10	0.336577	0.92	0.753	1.90774e-06	1	go-protein-localization-to-chromosome
go-ribosomal-small-subunit-export-from-nucleus1	4.25132e-10	0.262489	0.651	0.45	3.17361e-06	1	go-ribosomal-small-subunit-export-from-nucleus
go-endonucleolytic-cleavage-in-its1-to-separate-ssu-rrna-from-5-8s-rrna-and-lsu-rrna-from-tricistronic-rrna-transcript-ssu-rrna-5-8s-rrna-lsu-rrna-	4.25979e-10	0.276263	0.307	0.177	3.17993e-06	1	go-endonucleolytic-cleavage-in-its1-to-separate-ssu-rrna-from-5-8s-rrna-and-lsu-rrna-from-tricistronic-rrna-transcript-ssu-rrna-5-8s-rrna-lsu-rrna-
go-nucleoside-triphosphate-metabolic-process	6.96473e-10	0.299382	0.96	0.816	5.19917e-06	1	go-nucleoside-triphosphate-metabolic-process
go-protein-c-terminus-binding	9.49094e-10	0.254925	1	0.985	7.08499e-06	1	go-protein-c-terminus-binding
go-nucleus-organization	1.17438e-09	0.367926	0.993	0.961	8.76677e-06	1	go-nucleus-organization
go-regulation-of-phosphoprotein-phosphatase-activity	1.4489e-09	0.333807	0.998	0.951	1.08161e-05	1	go-regulation-of-phosphoprotein-phosphatase-activity
go-regulation-of-immunoglobulin-production	1.66561e-09	0.328784	0.976	0.815	1.24338e-05	1	go-regulation-of-immunoglobulin-production
go-response-to-leukemia-inhibitory-factor1	1.7451e-09	0.303639	1	0.96	1.30272e-05	1	go-response-to-leukemia-inhibitory-factor
go-protein-import	1.80541e-09	0.299744	1	0.978	1.34774e-05	1	go-protein-import
go-lymphocyte-costimulation	2.68339e-09	0.29712	0.956	0.813	2.00315e-05	1	go-lymphocyte-costimulation
go-nuclear-transcribed-mrna-catabolic-process-deadenylation-dependent-decay1	4.11666e-09	0.261267	0.998	0.929	3.07309e-05	1	go-nuclear-transcribed-mrna-catabolic-process-deadenylation-dependent-decay
go-prp19-complex	6.19733e-09	0.263428	0.385	0.255	4.62631e-05	1	go-prp19-complex
go-regulation-of-calcium-mediated-signaling	8.84481e-09	0.337284	0.998	0.938	6.60265e-05	1	go-regulation-of-calcium-mediated-signaling
go-nuclear-membrane	9.20852e-09	0.361849	0.996	0.966	6.87416e-05	1	go-nuclear-membrane
go-hydrogen-peroxide-metabolic-process	1.16128e-08	0.282542	0.385	0.274	8.66896e-05	1	go-hydrogen-peroxide-metabolic-process
go-positive-regulation-of-dna-metabolic-process	1.29294e-08	0.250239	0.998	0.982	9.65183e-05	1	go-positive-regulation-of-dna-metabolic-process
go-dephosphorylation	1.76766e-08	0.278265	1	0.984	0.000131956	1	go-dephosphorylation
go-regulation-of-protein-localization-to-chromosome-telomeric-region	1.81862e-08	0.254896	0.447	0.317	0.00013576	1	go-regulation-of-protein-localization-to-chromosome-telomeric-region
go-canonical-wnt-signaling-pathway	2.57136e-08	0.316035	1	0.976	0.000191952	1	go-canonical-wnt-signaling-pathway
go-androgen-receptor-signaling-pathway	3.07396e-08	0.25495	0.969	0.869	0.000229471	1	go-androgen-receptor-signaling-pathway
go-ubiquitin-binding	4.45319e-08	0.320729	0.982	0.873	0.000332431	1	go-ubiquitin-binding
go-erad-pathway	7.00941e-08	0.328517	0.984	0.875	0.000523253	1	go-erad-pathway
go-protein-phosphatase-type-1-complex	7.53973e-08	0.287946	0.276	0.186	0.000562841	1	go-protein-phosphatase-type-1-complex
go-steroid-hormone-mediated-signaling-pathway	8.45081e-08	0.350242	0.993	0.949	0.000630853	1	go-steroid-hormone-mediated-signaling-pathway
go-nucleoside-phosphate-metabolic-process	9.74078e-08	0.343572	0.995	0.967	0.00072715	1	go-nucleoside-phosphate-metabolic-process
go-peptide-disulfide-oxidoreductase-activity	1.49923e-07	0.25175	0.478	0.355	0.00111917	1	go-peptide-disulfide-oxidoreductase-activity
go-dna-templated-transcription-initiation	1.58769e-07	0.366707	0.996	0.945	0.00118521	1	go-dna-templated-transcription-initiation
go-chaperonin-containing-t-complex	2.23225e-07	0.266504	0.28	0.185	0.00166637	1	go-chaperonin-containing-t-complex
go-hormone-receptor-binding	3.50244e-07	0.268242	0.996	0.977	0.00261457	1	go-hormone-receptor-binding
go-ubiquitin-like-protein-binding	3.77768e-07	0.336785	0.985	0.914	0.00282004	1	go-ubiquitin-like-protein-binding
go-regulation-of-cellular-response-to-heat1	3.84206e-07	0.286401	0.98	0.877	0.0028681	1	go-regulation-of-cellular-response-to-heat
go-signal-transduction-in-response-to-dna-damage	4.46411e-07	0.267369	0.998	0.981	0.00333246	1	go-signal-transduction-in-response-to-dna-damage
go-protein-localization-to-nucleoplasm	5.42852e-07	0.259568	0.325	0.227	0.00405239	1	go-protein-localization-to-nucleoplasm
go-ubiquitin-ligase-complex	5.85454e-07	0.3391	0.993	0.958	0.00437041	1	go-ubiquitin-ligase-complex
go-positive-regulation-of-establishment-of-protein-localization-to-telomere	9.28034e-07	0.251272	0.298	0.204	0.00692777	1	go-positive-regulation-of-establishment-of-protein-localization-to-telomere
go-regulation-of-protein-dephosphorylation	9.80048e-07	0.263647	1	0.97	0.00731606	1	go-regulation-of-protein-dephosphorylation
go-g1-dna-damage-checkpoint1	1.12274e-06	0.272144	0.931	0.794	0.00838127	1	go-g1-dna-damage-checkpoint
go-regulation-of-protein-targeting	1.96956e-06	0.252213	0.996	0.922	0.0147028	1	go-regulation-of-protein-targeting
go-regulation-of-cell-cycle-arrest1	2.3933e-06	0.272432	1	0.971	0.017866	1	go-regulation-of-cell-cycle-arrest
go-ubiquitin-like-protein-transferase-activity	2.94524e-06	0.332773	0.998	0.963	0.0219862	1	go-ubiquitin-like-protein-transferase-activity
go-mitotic-cell-cycle-checkpoint1	4.1888e-06	0.301663	0.996	0.983	0.0312694	1	go-mitotic-cell-cycle-checkpoint
go-spindle-pole1	8.10191e-06	0.349235	0.996	0.96	0.0604808	1	go-spindle-pole
go-phosphatase-regulator-activity	1.57455e-05	0.367808	0.991	0.885	0.11754	1	go-phosphatase-regulator-activity
go-regulation-of-wnt-signaling-pathway	1.78569e-05	0.259928	0.998	0.985	0.133302	1	go-regulation-of-wnt-signaling-pathway
go-response-to-fibroblast-growth-factor	1.97602e-05	0.328468	0.995	0.967	0.14751	1	go-response-to-fibroblast-growth-factor
go-peptidyl-proline-modification	2.23589e-05	0.260493	0.895	0.778	0.166909	1	go-peptidyl-proline-modification
go-regulation-of-nuclear-division	2.29371e-05	0.353655	0.996	0.956	0.171225	1	go-regulation-of-nuclear-division
go-intracellular-steroid-hormone-receptor-signaling-pathway	3.10265e-05	0.251337	0.993	0.952	0.231613	1	go-intracellular-steroid-hormone-receptor-signaling-pathway
go-protein-serine-threonine-phosphatase-activity	3.49043e-05	0.289782	0.985	0.858	0.260561	1	go-protein-serine-threonine-phosphatase-activity
go-atpase-binding	3.53773e-05	0.254163	0.989	0.889	0.264092	1	go-atpase-binding
go-regulation-of-sister-chromatid-segregation	5.04008e-05	0.282963	0.949	0.814	0.376242	1	go-regulation-of-sister-chromatid-segregation
go-peptidyl-lysine-modification	7.04205e-05	0.322862	0.993	0.951	0.525689	1	go-peptidyl-lysine-modification
go-positive-regulation-of-cell-cycle-process	7.33154e-05	0.261626	1	0.987	0.5473	1	go-positive-regulation-of-cell-cycle-process
go-phosphatase-binding	0.000120845	0.306923	0.993	0.964	0.902105	1	go-phosphatase-binding
go-chromosome-telomeric-region	0.00015526	0.26244	0.991	0.964	1	1	go-chromosome-telomeric-region
go-hepaticobiliary-system-development	0.000172922	0.283323	1	0.98	1	1	go-hepaticobiliary-system-development
go-positive-regulation-of-protein-localization-to-nucleus	0.000192725	0.254326	0.958	0.814	1	1	go-positive-regulation-of-protein-localization-to-nucleus
go-isomerase-activity	0.000224218	0.291344	0.991	0.933	1	1	go-isomerase-activity
go-endoplasmic-reticulum-unfolded-protein-response	0.000395527	0.305711	0.985	0.904	1	1	go-endoplasmic-reticulum-unfolded-protein-response
go-calcium-mediated-signaling	0.000441776	0.37123	0.996	0.95	1	1	go-calcium-mediated-signaling
go-supramolecular-complex	0.000445199	0.303	0.998	0.96	1	1	go-supramolecular-complex
go-microtubule-cytoskeleton-organization	0.000599976	0.314769	0.995	0.967	1	1	go-microtubule-cytoskeleton-organization
go-cytoskeleton-dependent-intracellular-transport	0.000632619	0.255983	1	0.963	1	1	go-cytoskeleton-dependent-intracellular-transport
go-cell-cycle-checkpoint1	0.000789853	0.302196	0.995	0.982	1	1	go-cell-cycle-checkpoint
go-mitotic-sister-chromatid-segregation	0.00101554	0.330403	0.995	0.922	1	1	go-mitotic-sister-chromatid-segregation
go-methyltransferase-complex	0.00129987	0.268088	0.96	0.865	1	1	go-methyltransferase-complex
go-macromolecule-methylation	0.00160637	0.342641	0.978	0.945	1	1	go-macromolecule-methylation
go-protein-heterooligomerization	0.00179354	0.389084	0.984	0.909	1	1	go-protein-heterooligomerization
go-covalent-chromatin-modification	0.00195269	0.313776	0.984	0.94	1	1	go-covalent-chromatin-modification
go-microtubule	0.00231222	0.331344	0.991	0.95	1	1	go-microtubule
go-nucleoside-triphosphatase-regulator-activity	0.00246998	0.267208	0.996	0.974	1	1	go-nucleoside-triphosphatase-regulator-activity
go-cellular-response-to-heat	0.00351134	0.266917	0.984	0.931	1	1	go-cellular-response-to-heat
go-head-development	0.00524513	0.279689	1	0.981	1	1	go-head-development
go-polymeric-cytoskeletal-fiber	0.00682571	0.284434	0.996	0.959	1	1	go-polymeric-cytoskeletal-fiber
go-transcription-initiation-from-rna-polymerase-ii-promoter	0.00702029	0.321458	0.985	0.923	1	1	go-transcription-initiation-from-rna-polymerase-ii-promoter
go-methylation	0.00791402	0.353827	0.975	0.945	1	1	go-methylation
go-helicase-activity	0.00844573	0.269436	0.973	0.897	1	1	go-helicase-activity
go-immunoglobulin-binding	7.51294e-240	0.986231	0.96	0.123	5.60841e-236	2	go-immunoglobulin-binding
go-igg-binding	2.85475e-230	0.986829	0.693	0.046	2.13107e-226	2	go-igg-binding
go-regulation-of-dendritic-cell-differentiation	8.51919e-230	1.07904	0.779	0.068	6.35957e-226	2	go-regulation-of-dendritic-cell-differentiation
go-inflammatory-response-to-wounding	1.08534e-211	0.834981	0.609	0.037	8.10204e-208	2	go-inflammatory-response-to-wounding
go-t-cell-activation-via-t-cell-receptor-contact-with-antigen-bound-to-mhc-molecule-on-antigen-presenting-cell	8.10751e-210	1.05164	0.595	0.035	6.05226e-206	2	go-t-cell-activation-via-t-cell-receptor-contact-with-antigen-bound-to-mhc-molecule-on-antigen-presenting-cell
go-regulation-of-neutrophil-activation	1.22532e-185	0.85992	0.652	0.058	9.147e-182	2	go-regulation-of-neutrophil-activation
go-regulation-of-t-cell-activation-via-t-cell-receptor-contact-with-antigen-bound-to-mhc-molecule-on-antigen-presenting-cell	1.91111e-185	0.93968	0.42	0.011	1.42665e-181	2	go-regulation-of-t-cell-activation-via-t-cell-receptor-contact-with-antigen-bound-to-mhc-molecule-on-antigen-presenting-cell
go-osteoclast-development	1.03392e-176	0.396319	0.681	0.073	7.7182e-173	2	go-osteoclast-development
go-tumor-necrosis-factor-biosynthetic-process	8.57219e-172	0.521959	0.667	0.075	6.39914e-168	2	go-tumor-necrosis-factor-biosynthetic-process
go-interleukin-10-secretion	2.0242e-170	0.764481	0.425	0.016	1.51107e-166	2	go-interleukin-10-secretion
go-cellular-response-to-thyroid-hormone-stimulus	8.67893e-165	0.42586	0.598	0.055	6.47882e-161	2	go-cellular-response-to-thyroid-hormone-stimulus
go-positive-regulation-of-mast-cell-activation-involved-in-immune-response	2.5073e-163	0.586162	0.736	0.092	1.8717e-159	2	go-positive-regulation-of-mast-cell-activation-involved-in-immune-response
go-negative-regulation-of-b-cell-proliferation	2.65777e-162	0.653743	0.73	0.095	1.98403e-158	2	go-negative-regulation-of-b-cell-proliferation
go-cellular-response-to-lipoprotein-particle-stimulus	2.01138e-160	0.480887	0.945	0.176	1.50149e-156	2	go-cellular-response-to-lipoprotein-particle-stimulus
go-positive-regulation-of-mast-cell-activation	5.26581e-159	0.327417	0.744	0.1	3.93093e-155	2	go-positive-regulation-of-mast-cell-activation
go-positive-regulation-of-chemokine-secretion	3.64962e-155	0.263629	0.534	0.044	2.72444e-151	2	go-positive-regulation-of-chemokine-secretion
go-regulation-of-podosome-assembly	5.34003e-153	0.719254	0.761	0.116	3.98633e-149	2	go-regulation-of-podosome-assembly
go-pyrimidine-nucleoside-catabolic-process	6.74418e-153	0.59571	0.75	0.117	5.03453e-149	2	go-pyrimidine-nucleoside-catabolic-process
go-positive-regulation-of-interleukin-8-secretion	2.29556e-150	0.656513	0.796	0.125	1.71364e-146	2	go-positive-regulation-of-interleukin-8-secretion
go-cell-activation-involved-in-immune-response	1.58465e-148	0.776983	1	1	1.18294e-144	2	go-cell-activation-involved-in-immune-response
go-cytoplasmic-vesicle-part	3.40095e-148	0.649464	1	1	2.53881e-144	2	go-cytoplasmic-vesicle-part
go-interleukin-6-biosynthetic-process	4.55833e-148	0.347317	0.681	0.091	3.40279e-144	2	go-interleukin-6-biosynthetic-process
go-secretion	8.25704e-148	0.788892	1	1	6.16388e-144	2	go-secretion
go-endolysosome	3.57807e-147	0.919271	0.937	0.214	2.67103e-143	2	go-endolysosome
go-pinocytosis	7.52562e-147	0.542509	0.626	0.081	5.61787e-143	2	go-pinocytosis
go-exocytosis	9.11016e-147	0.781686	1	1	6.80073e-143	2	go-exocytosis
go-whole-membrane	1.44385e-146	0.512997	1	1	1.07783e-142	2	go-whole-membrane
go-myeloid-leukocyte-mediated-immunity	3.95881e-145	0.77738	1	1	2.95525e-141	2	go-myeloid-leukocyte-mediated-immunity
go-myeloid-leukocyte-activation	4.74755e-145	0.778488	1	1	3.54405e-141	2	go-myeloid-leukocyte-activation
go-cell-activation	1.28599e-144	0.552289	1	1	9.59993e-141	2	go-cell-activation
go-tumor-necrosis-factor-secretion	2.83885e-144	0.255444	0.509	0.046	2.1192e-140	2	go-tumor-necrosis-factor-secretion
go-vacuole	5.13931e-144	0.774254	1	1	3.83649e-140	2	go-vacuole
go-secretory-vesicle	9.25273e-144	0.784571	1	1	6.90716e-140	2	go-secretory-vesicle
go-toll-like-receptor-binding	7.01386e-143	0.765669	0.612	0.07	5.23584e-139	2	go-toll-like-receptor-binding
go-immune-effector-process	3.37152e-140	0.564208	1	1	2.51684e-136	2	go-immune-effector-process
go-secretory-granule	7.09181e-140	0.800816	1	1	5.29403e-136	2	go-secretory-granule
go-ceramide-catabolic-process	1.56575e-137	0.297909	0.52	0.052	1.16883e-133	2	go-ceramide-catabolic-process
go-membrane-lipid-catabolic-process	2.87976e-137	0.30179	0.747	0.122	2.14974e-133	2	go-membrane-lipid-catabolic-process
go-leukocyte-mediated-immunity	4.01453e-137	0.659872	1	1	2.99685e-133	2	go-leukocyte-mediated-immunity
go-vacuolar-part	7.28313e-137	0.797999	1	1	5.43686e-133	2	go-vacuolar-part
go-secretory-granule-membrane	1.079e-136	0.964664	1	0.994	8.05476e-133	2	go-secretory-granule-membrane
go-positive-regulation-of-regulatory-t-cell-differentiation	9.22656e-136	0.358764	0.368	0.018	6.88763e-132	2	go-positive-regulation-of-regulatory-t-cell-differentiation
go-ribonucleoside-catabolic-process	1.29507e-134	0.451237	0.557	0.068	9.66768e-131	2	go-ribonucleoside-catabolic-process
go-macrophage-activation-involved-in-immune-response	8.83558e-132	0.575805	0.514	0.052	6.59576e-128	2	go-macrophage-activation-involved-in-immune-response
go-oxidoreductase-activity-acting-on-nad-p-h-oxygen-as-acceptor	8.52205e-131	0.310052	0.632	0.085	6.36171e-127	2	go-oxidoreductase-activity-acting-on-nad-p-h-oxygen-as-acceptor
go-regulation-of-mast-cell-activation	2.19291e-130	1.21832	0.997	0.454	1.63701e-126	2	go-regulation-of-mast-cell-activation
go-nucleoside-catabolic-process	5.68561e-130	0.620055	0.868	0.195	4.24431e-126	2	go-nucleoside-catabolic-process
go-cellular-copper-ion-homeostasis	7.57308e-130	0.654326	0.69	0.109	5.65331e-126	2	go-cellular-copper-ion-homeostasis
go-negative-regulation-of-chemokine-production	6.98337e-128	0.279433	0.497	0.052	5.21309e-124	2	go-negative-regulation-of-chemokine-production
go-innate-immune-response	1.48119e-127	0.564103	1	1	1.1057e-123	2	go-innate-immune-response
go-defense-response	6.78022e-127	0.536023	1	1	5.06143e-123	2	go-defense-response
go-response-to-thyroid-hormone	1.25083e-126	0.887579	0.994	0.295	9.33748e-123	2	go-response-to-thyroid-hormone
go-regulation-of-transport	1.55312e-126	0.560963	1	1	1.15941e-122	2	go-regulation-of-transport
go-negative-regulation-of-interleukin-12-production	9.7499e-125	0.381994	0.494	0.053	7.2783e-121	2	go-negative-regulation-of-interleukin-12-production
go-phospholipase-inhibitor-activity	6.18214e-124	0.585956	0.678	0.103	4.61497e-120	2	go-phospholipase-inhibitor-activity
go-regulation-of-mast-cell-activation-involved-in-immune-response	1.3358e-123	1.13038	0.994	0.415	9.97176e-120	2	go-regulation-of-mast-cell-activation-involved-in-immune-response
go-azurophil-granule	1.53077e-123	0.81426	1	0.997	1.14272e-119	2	go-azurophil-granule
go-deaminase-activity	9.90535e-123	0.264541	0.598	0.086	7.39435e-119	2	go-deaminase-activity
go-glycosyl-compound-catabolic-process	1.79766e-122	0.729293	0.937	0.253	1.34195e-118	2	go-glycosyl-compound-catabolic-process
go-pattern-recognition-receptor-activity	6.53838e-121	0.439442	0.491	0.055	4.8809e-117	2	go-pattern-recognition-receptor-activity
go-hydrolase-activity-acting-on-carbon-nitrogen-but-not-peptide-bonds-in-cyclic-amidines	1.01242e-120	0.412198	0.687	0.122	7.5577e-117	2	go-hydrolase-activity-acting-on-carbon-nitrogen-but-not-peptide-bonds-in-cyclic-amidines
go-positive-regulation-of-interleukin-10-secretion	1.69736e-119	0.628676	0.296	0.01	1.26708e-115	2	go-positive-regulation-of-interleukin-10-secretion
go-negative-regulation-of-mast-cell-activation	2.32449e-119	0.31907	0.25	0.003	1.73524e-115	2	go-negative-regulation-of-mast-cell-activation
go-positive-regulation-of-actin-cytoskeleton-reorganization	5.69437e-119	0.335358	0.54	0.071	4.25085e-115	2	go-positive-regulation-of-actin-cytoskeleton-reorganization
go-vacuolar-lumen	1.09541e-118	0.77194	1	0.998	8.17726e-115	2	go-vacuolar-lumen
go-vacuolar-acidification	1.12271e-118	0.836844	0.925	0.256	8.38104e-115	2	go-vacuolar-acidification
go-dendritic-cell-antigen-processing-and-presentation	1.55969e-118	0.571718	0.489	0.052	1.16431e-114	2	go-dendritic-cell-antigen-processing-and-presentation
go-cellular-response-to-oxygen-containing-compound	1.77668e-118	0.590534	1	1	1.32629e-114	2	go-cellular-response-to-oxygen-containing-compound
go-regulation-of-antigen-processing-and-presentation	1.26714e-117	0.8267	0.963	0.253	9.45921e-114	2	go-regulation-of-antigen-processing-and-presentation
go-vesicle-membrane	3.75991e-117	0.553186	1	1	2.80677e-113	2	go-vesicle-membrane
go-positive-regulation-of-interleukin-6-secretion	5.91122e-117	0.831786	0.983	0.307	4.41272e-113	2	go-positive-regulation-of-interleukin-6-secretion
go-regulation-of-anatomical-structure-morphogenesis	1.44782e-115	0.744404	1	0.996	1.0808e-111	2	go-regulation-of-anatomical-structure-morphogenesis
go-ficolin-1-rich-granule-membrane	3.74548e-115	1.16507	1	0.798	2.796e-111	2	go-ficolin-1-rich-granule-membrane
go-tertiary-granule	4.40229e-115	0.750476	1	1	3.28631e-111	2	go-tertiary-granule
go-leukocyte-migration-involved-in-inflammatory-response	4.46934e-115	0.561784	0.649	0.1	3.33636e-111	2	go-leukocyte-migration-involved-in-inflammatory-response
go-histamine-transport	5.13403e-114	0.566191	0.425	0.041	3.83255e-110	2	go-histamine-transport
go-cysteine-type-endopeptidase-activator-activity-involved-in-apoptotic-process	9.8567e-114	0.491228	0.667	0.116	7.35803e-110	2	go-cysteine-type-endopeptidase-activator-activity-involved-in-apoptotic-process
go-nadph-oxidase-complex	1.71534e-113	0.253947	0.534	0.068	1.2805e-109	2	go-nadph-oxidase-complex
go-dendritic-cell-differentiation	1.01209e-112	1.02082	0.977	0.375	7.55523e-109	2	go-dendritic-cell-differentiation
go-positive-regulation-of-protein-oligomerization	3.35485e-112	0.290887	0.595	0.095	2.50439e-108	2	go-positive-regulation-of-protein-oligomerization
go-positive-regulation-of-interleukin-1-secretion	3.91578e-112	0.777964	0.951	0.294	2.92313e-108	2	go-positive-regulation-of-interleukin-1-secretion
go-pentose-phosphate-shunt	1.00456e-111	0.559788	0.681	0.122	7.49903e-108	2	go-pentose-phosphate-shunt
go-proton-transporting-v-type-atpase-v0-domain	1.10316e-111	0.666308	0.52	0.068	8.23508e-108	2	go-proton-transporting-v-type-atpase-v0-domain
go-response-to-oxygen-containing-compound	1.99565e-111	0.474225	1	1	1.48975e-107	2	go-response-to-oxygen-containing-compound
go-vesicle-lumen	3.0486e-111	0.521632	1	1	2.27578e-107	2	go-vesicle-lumen
go-nucleobase-metabolic-process	5.10732e-111	0.292358	0.434	0.045	3.81261e-107	2	go-nucleobase-metabolic-process
go-inflammasome-complex	7.57639e-111	0.502727	0.655	0.113	5.65577e-107	2	go-inflammasome-complex
go-positive-regulation-of-vacuole-organization	8.75442e-111	0.400363	0.466	0.053	6.53517e-107	2	go-positive-regulation-of-vacuole-organization
go-import-into-cell	1.21909e-110	1.05799	1	0.966	9.10049e-107	2	go-import-into-cell
go-positive-regulation-of-tumor-necrosis-factor-biosynthetic-process	3.30949e-110	0.321432	0.371	0.029	2.47054e-106	2	go-positive-regulation-of-tumor-necrosis-factor-biosynthetic-process
go-endolysosome-membrane	1.55907e-109	0.387914	0.514	0.067	1.16385e-105	2	go-endolysosome-membrane
go-negative-regulation-of-leukocyte-proliferation	2.00039e-109	1.22436	1	0.729	1.49329e-105	2	go-negative-regulation-of-leukocyte-proliferation
go-negative-regulation-of-interleukin-1-beta-production	7.37716e-109	0.400828	0.698	0.138	5.50705e-105	2	go-negative-regulation-of-interleukin-1-beta-production
go-negative-regulation-of-interleukin-1-production	1.54153e-108	0.290739	0.718	0.141	1.15075e-104	2	go-negative-regulation-of-interleukin-1-production
go-pyrimidine-ribonucleoside-catabolic-process	5.96266e-108	0.39893	0.368	0.03	4.45112e-104	2	go-pyrimidine-ribonucleoside-catabolic-process
go-vacuolar-membrane	7.21872e-108	0.686047	1	1	5.38878e-104	2	go-vacuolar-membrane
go-respiratory-burst-involved-in-defense-response	7.39901e-108	0.525596	0.661	0.113	5.52336e-104	2	go-respiratory-burst-involved-in-defense-response
go-endocytosis	1.42927e-107	1.02109	1	0.976	1.06695e-103	2	go-endocytosis
go-negative-regulation-of-release-of-cytochrome-c-from-mitochondria	3.25718e-107	0.330451	0.753	0.155	2.43148e-103	2	go-negative-regulation-of-release-of-cytochrome-c-from-mitochondria
go-regulation-of-integrin-mediated-signaling-pathway	4.90821e-107	0.556285	0.566	0.085	3.66398e-103	2	go-regulation-of-integrin-mediated-signaling-pathway
go-regulation-of-microglial-cell-activation	6.40303e-107	0.49735	0.862	0.214	4.77986e-103	2	go-regulation-of-microglial-cell-activation
go-positive-regulation-of-mononuclear-cell-migration	2.56255e-106	0.48998	0.862	0.216	1.91294e-102	2	go-positive-regulation-of-mononuclear-cell-migration
go-regulation-of-vesicle-mediated-transport	1.60389e-105	0.637489	1	0.998	1.1973e-101	2	go-regulation-of-vesicle-mediated-transport
go-regulation-of-defense-response	1.71614e-105	0.478672	1	1	1.2811e-101	2	go-regulation-of-defense-response
go-astrocyte-development	7.10293e-104	0.275274	0.937	0.228	5.30233e-100	2	go-astrocyte-development
go-cytidine-deaminase-activity	8.17043e-104	0.383732	0.279	0.013	6.09922e-100	2	go-cytidine-deaminase-activity
go-invadopodium	4.02085e-103	0.285839	0.399	0.041	3.00157e-99	2	go-invadopodium
go-copper-ion-homeostasis	1.1303e-102	0.584792	0.736	0.161	8.43772e-99	2	go-copper-ion-homeostasis
go-negative-regulation-of-interferon-beta-production	3.10252e-102	0.331048	0.408	0.043	2.31603e-98	2	go-negative-regulation-of-interferon-beta-production
go-bone-cell-development	8.55769e-102	0.641724	0.937	0.282	6.38832e-98	2	go-bone-cell-development
go-negative-regulation-of-endocytosis	1.50709e-101	0.624301	0.96	0.281	1.12505e-97	2	go-negative-regulation-of-endocytosis
go-toll-like-receptor-4-signaling-pathway	4.9719e-101	0.394415	0.825	0.199	3.71152e-97	2	go-toll-like-receptor-4-signaling-pathway
go-negative-regulation-of-extracellular-matrix-organization	9.77241e-101	0.270697	0.371	0.034	7.29511e-97	2	go-negative-regulation-of-extracellular-matrix-organization
go-histamine-production-involved-in-inflammatory-response	3.92589e-100	0.622213	0.339	0.027	2.93068e-96	2	go-histamine-production-involved-in-inflammatory-response
go-clathrin-coat-of-coated-pit	4.83241e-100	0.542297	0.684	0.147	3.6074e-96	2	go-clathrin-coat-of-coated-pit
go-transcytosis	4.11327e-99	0.2791	0.431	0.053	3.07056e-95	2	go-transcytosis
go-superoxide-generating-nadph-oxidase-activity	7.22944e-99	0.447765	0.437	0.051	5.39678e-95	2	go-superoxide-generating-nadph-oxidase-activity
go-inflammatory-response	1.11952e-98	0.682555	1	0.999	8.35723e-95	2	go-inflammatory-response
go-regulation-of-leukocyte-degranulation	1.36267e-98	1.05892	1	0.673	1.01723e-94	2	go-regulation-of-leukocyte-degranulation
go-activation-of-innate-immune-response	2.21972e-98	0.496461	1	1	1.65702e-94	2	go-activation-of-innate-immune-response
go-negative-regulation-of-receptor-mediated-endocytosis	7.90479e-98	0.368778	0.687	0.147	5.90093e-94	2	go-negative-regulation-of-receptor-mediated-endocytosis
go-lysosomal-lumen	5.53866e-97	0.998396	1	0.938	4.13461e-93	2	go-lysosomal-lumen
go-ficolin-1-rich-granule	5.75621e-97	0.459093	1	1	4.29701e-93	2	go-ficolin-1-rich-granule
go-positive-regulation-of-release-of-cytochrome-c-from-mitochondria	2.57797e-96	0.888751	0.968	0.374	1.92446e-92	2	go-positive-regulation-of-release-of-cytochrome-c-from-mitochondria
go-organonitrogen-compound-catabolic-process	5.05865e-96	0.420405	1	1	3.77628e-92	2	go-organonitrogen-compound-catabolic-process
go-negative-regulation-of-leukocyte-degranulation	8.00913e-96	0.389375	0.307	0.022	5.97882e-92	2	go-negative-regulation-of-leukocyte-degranulation
go-regulation-of-immune-system-process	8.96594e-96	0.290956	1	1	6.69308e-92	2	go-regulation-of-immune-system-process
go-card-domain-binding	5.58362e-95	0.331906	0.491	0.072	4.16817e-91	2	go-card-domain-binding
go-toll-like-receptor-9-signaling-pathway	8.26817e-95	0.307237	0.589	0.111	6.17219e-91	2	go-toll-like-receptor-9-signaling-pathway
go-antigen-processing-and-presentation	8.93007e-95	0.497591	1	1	6.6663e-91	2	go-antigen-processing-and-presentation
go-pyrimidine-containing-compound-metabolic-process	1.46887e-94	0.261462	0.67	0.139	1.09651e-90	2	go-pyrimidine-containing-compound-metabolic-process
go-regulation-of-neuroinflammatory-response	1.2657e-93	0.475062	0.925	0.263	9.44844e-90	2	go-regulation-of-neuroinflammatory-response
go-peptidase-activator-activity-involved-in-apoptotic-process	1.5914e-93	0.613773	0.819	0.219	1.18798e-89	2	go-peptidase-activator-activity-involved-in-apoptotic-process
go-low-density-lipoprotein-particle-receptor-catabolic-process	2.77661e-93	0.606043	0.799	0.193	2.07274e-89	2	go-low-density-lipoprotein-particle-receptor-catabolic-process
go-response-to-angiotensin	2.85885e-93	0.255044	0.687	0.147	2.13414e-89	2	go-response-to-angiotensin
go-regulation-of-innate-immune-response	7.83567e-93	0.447783	1	1	5.84933e-89	2	go-regulation-of-innate-immune-response
go-negative-regulation-of-regulated-secretory-pathway	6.31661e-92	0.646243	0.799	0.229	4.71535e-88	2	go-negative-regulation-of-regulated-secretory-pathway
go-lysosome-localization	6.80182e-92	1.06653	1	0.777	5.07756e-88	2	go-lysosome-localization
go-cysteine-type-endopeptidase-activity-involved-in-apoptotic-process	7.37359e-92	0.375758	0.603	0.114	5.50439e-88	2	go-cysteine-type-endopeptidase-activity-involved-in-apoptotic-process
go-mast-cell-mediated-immunity	2.0249e-91	1.04251	0.997	0.605	1.51159e-87	2	go-mast-cell-mediated-immunity
go-regulation-of-protein-tyrosine-phosphatase-activity	2.12392e-91	0.606731	0.302	0.023	1.5855e-87	2	go-regulation-of-protein-tyrosine-phosphatase-activity
go-response-to-hydroperoxide	3.48912e-91	0.417414	0.94	0.259	2.60463e-87	2	go-response-to-hydroperoxide
go-regulation-of-myeloid-leukocyte-mediated-immunity	6.40203e-91	0.982147	1	0.81	4.77911e-87	2	go-regulation-of-myeloid-leukocyte-mediated-immunity
go-regulation-of-response-to-stress	1.55812e-90	0.329466	1	1	1.16314e-86	2	go-regulation-of-response-to-stress
go-positive-regulation-of-sodium-ion-transmembrane-transport	5.19957e-90	0.414019	0.647	0.145	3.88148e-86	2	go-positive-regulation-of-sodium-ion-transmembrane-transport
go-amyloid-beta-clearance	6.09774e-89	0.315686	0.747	0.179	4.55196e-85	2	go-amyloid-beta-clearance
go-integrin-mediated-signaling-pathway	8.62535e-89	1.04284	1	0.784	6.43882e-85	2	go-integrin-mediated-signaling-pathway
go-interleukin-6-production	1.61537e-88	0.99452	1	0.934	1.20587e-84	2	go-interleukin-6-production
go-regulation-of-release-of-cytochrome-c-from-mitochondria	2.62979e-88	1.01423	1	0.643	1.96314e-84	2	go-regulation-of-release-of-cytochrome-c-from-mitochondria
go-mammary-gland-epithelial-cell-proliferation	8.28805e-88	0.693885	0.925	0.321	6.18703e-84	2	go-mammary-gland-epithelial-cell-proliferation
go-azurophil-granule-lumen	3.60397e-87	0.693832	1	0.98	2.69036e-83	2	go-azurophil-granule-lumen
go-response-to-wounding	4.06104e-87	0.620988	1	0.995	3.03157e-83	2	go-response-to-wounding
go-negative-regulation-of-t-cell-receptor-signaling-pathway	1.36628e-86	0.469151	0.713	0.176	1.01992e-82	2	go-negative-regulation-of-t-cell-receptor-signaling-pathway
go-regulation-of-cysteine-type-endopeptidase-activity-involved-in-apoptotic-signaling-pathway	1.91413e-86	0.469163	0.672	0.153	1.4289e-82	2	go-regulation-of-cysteine-type-endopeptidase-activity-involved-in-apoptotic-signaling-pathway
go-regulation-of-immune-response	3.0843e-86	0.294709	1	1	2.30243e-82	2	go-regulation-of-immune-response
go-activation-of-immune-response	3.11132e-86	0.365208	1	1	2.3226e-82	2	go-activation-of-immune-response
go-specific-granule	4.90875e-86	0.730598	1	0.988	3.66438e-82	2	go-specific-granule
go-positive-regulation-of-leukocyte-degranulation	5.62037e-86	0.782154	0.971	0.375	4.1956e-82	2	go-positive-regulation-of-leukocyte-degranulation
go-protein-phosphatase-1-binding	2.01031e-85	0.588812	0.721	0.194	1.50069e-81	2	go-protein-phosphatase-1-binding
go-ragulator-complex	2.37431e-85	0.752183	0.543	0.098	1.77242e-81	2	go-ragulator-complex
go-vacuolar-proton-transporting-v-type-atpase-complex	5.04316e-85	0.359766	0.641	0.139	3.76472e-81	2	go-vacuolar-proton-transporting-v-type-atpase-complex
go-azurophil-granule-membrane	7.42715e-85	0.897475	1	0.839	5.54437e-81	2	go-azurophil-granule-membrane
go-mast-cell-activation	2.12586e-84	1.03783	1	0.713	1.58695e-80	2	go-mast-cell-activation
go-collagen-containing-extracellular-matrix	1.30988e-83	0.925554	1	0.565	9.77824e-80	2	go-collagen-containing-extracellular-matrix
go-osteoclast-differentiation	1.3994e-83	1.00603	1	0.913	1.04465e-79	2	go-osteoclast-differentiation
go-regulation-of-lysosomal-lumen-ph	1.42651e-83	0.531875	0.454	0.072	1.06489e-79	2	go-regulation-of-lysosomal-lumen-ph
go-endoplasmic-reticulum-subcompartment	2.99857e-83	0.434845	0.672	0.167	2.23843e-79	2	go-endoplasmic-reticulum-subcompartment
go-podosome-assembly	3.35058e-83	0.73486	0.879	0.299	2.50121e-79	2	go-podosome-assembly
go-phagocytosis	5.68507e-83	0.501461	1	1	4.24391e-79	2	go-phagocytosis
go-establishment-or-maintenance-of-actin-cytoskeleton-polarity	1.37234e-82	0.461456	0.428	0.064	1.02445e-78	2	go-establishment-or-maintenance-of-actin-cytoskeleton-polarity
go-golgi-apparatus	1.64876e-82	0.520619	1	1	1.2308e-78	2	go-golgi-apparatus
go-negative-regulation-of-multicellular-organismal-process	4.76715e-82	0.681396	1	0.995	3.55868e-78	2	go-negative-regulation-of-multicellular-organismal-process
go-cell-trailing-edge	1.14738e-81	0.710066	0.73	0.187	8.5652e-78	2	go-cell-trailing-edge
go-mitochondrial-fragmentation-involved-in-apoptotic-process	1.47513e-81	0.531788	0.428	0.064	1.10118e-77	2	go-mitochondrial-fragmentation-involved-in-apoptotic-process
go-positive-regulation-of-podosome-assembly	2.00332e-81	0.476985	0.443	0.068	1.49548e-77	2	go-positive-regulation-of-podosome-assembly
go-proton-transporting-atpase-activity-rotational-mechanism	6.828e-81	0.625458	0.891	0.298	5.0971e-77	2	go-proton-transporting-atpase-activity-rotational-mechanism
go-f-actin-capping-protein-complex	7.92533e-81	0.658966	0.532	0.099	5.91626e-77	2	go-f-actin-capping-protein-complex
go-regulation-of-peptidase-activity	1.0956e-80	0.489767	1	0.999	8.17869e-77	2	go-regulation-of-peptidase-activity
go-cellular-response-to-biotic-stimulus	1.94026e-80	0.696999	1	0.994	1.4484e-76	2	go-cellular-response-to-biotic-stimulus
go-cell-cell-signaling	4.65226e-80	0.703871	1	0.994	3.47291e-76	2	go-cell-cell-signaling
go-positive-regulation-of-multicellular-organismal-process	6.20669e-80	0.425776	1	1	4.6333e-76	2	go-positive-regulation-of-multicellular-organismal-process
go-epithelium-development	8.00215e-80	0.698386	1	0.985	5.9736e-76	2	go-epithelium-development
go-negative-regulation-of-viral-entry-into-host-cell	3.36065e-79	0.700759	0.966	0.343	2.50873e-75	2	go-negative-regulation-of-viral-entry-into-host-cell
go-small-molecule-metabolic-process	6.8263e-79	0.519242	1	0.998	5.09584e-75	2	go-small-molecule-metabolic-process
go-lysosomal-lumen-acidification	9.10502e-79	0.548324	0.31	0.032	6.7969e-75	2	go-lysosomal-lumen-acidification
go-leukocyte-activation-involved-in-inflammatory-response	1.53314e-78	0.887054	0.997	0.574	1.14449e-74	2	go-leukocyte-activation-involved-in-inflammatory-response
go-nucleobase-containing-small-molecule-catabolic-process	5.55989e-78	0.681171	0.968	0.353	4.15046e-74	2	go-nucleobase-containing-small-molecule-catabolic-process
go-regulation-of-response-to-external-stimulus	5.66809e-78	0.539917	1	1	4.23123e-74	2	go-regulation-of-response-to-external-stimulus
go-positive-regulation-of-interleukin-6-production	6.1578e-78	0.976709	1	0.79	4.5968e-74	2	go-positive-regulation-of-interleukin-6-production
go-pyrimidine-containing-compound-salvage	7.23113e-78	0.442349	0.417	0.063	5.39804e-74	2	go-pyrimidine-containing-compound-salvage
go-early-phagosome	1.38001e-77	0.323935	0.259	0.02	1.03018e-73	2	go-early-phagosome
go-interleukin-1-beta-production	2.382e-77	0.977612	1	0.778	1.77816e-73	2	go-interleukin-1-beta-production
go-positive-regulation-of-transport	3.70503e-77	0.422972	1	1	2.76581e-73	2	go-positive-regulation-of-transport
go-nucleoside-salvage	3.92014e-77	0.34594	0.759	0.193	2.92638e-73	2	go-nucleoside-salvage
go-glial-cell-activation	7.01024e-77	0.899319	0.997	0.592	5.23314e-73	2	go-glial-cell-activation
go-negative-regulation-of-cell-activation	8.30097e-77	0.868744	1	0.971	6.19668e-73	2	go-negative-regulation-of-cell-activation
go-interleukin-6-secretion	9.06032e-77	0.644581	0.983	0.38	6.76353e-73	2	go-interleukin-6-secretion
go-positive-regulation-of-viral-entry-into-host-cell	1.04683e-76	0.739743	0.833	0.23	7.81461e-73	2	go-positive-regulation-of-viral-entry-into-host-cell
go-response-to-nitrogen-compound	1.498e-76	0.387425	1	1	1.11826e-72	2	go-response-to-nitrogen-compound
go-positive-regulation-of-defense-response	1.53535e-76	0.397452	1	1	1.14614e-72	2	go-positive-regulation-of-defense-response
go-glutathione-derivative-biosynthetic-process	1.81858e-76	0.518638	0.773	0.233	1.35757e-72	2	go-glutathione-derivative-biosynthetic-process
go-cellular-response-to-nitrogen-compound	2.58119e-76	0.530145	1	0.998	1.92686e-72	2	go-cellular-response-to-nitrogen-compound
go-glucocorticoid-receptor-binding	4.28686e-76	0.435832	0.592	0.128	3.20014e-72	2	go-glucocorticoid-receptor-binding
go-establishment-or-maintenance-of-cytoskeleton-polarity	4.3182e-76	0.286443	0.454	0.08	3.22354e-72	2	go-establishment-or-maintenance-of-cytoskeleton-polarity
go-regulation-of-phagocytosis	1.73356e-75	0.777443	1	0.958	1.29411e-71	2	go-regulation-of-phagocytosis
go-polyamine-metabolic-process	2.66601e-75	0.670947	0.664	0.159	1.99018e-71	2	go-polyamine-metabolic-process
go-positive-regulation-of-ion-transport	7.09144e-75	0.879578	1	0.951	5.29376e-71	2	go-positive-regulation-of-ion-transport
go-pyrimidine-containing-compound-catabolic-process	8.72947e-75	0.472313	0.874	0.281	6.51655e-71	2	go-pyrimidine-containing-compound-catabolic-process
go-positive-regulation-of-interleukin-1-production	1.0794e-74	0.85483	0.997	0.5	8.05775e-71	2	go-positive-regulation-of-interleukin-1-production
go-release-of-cytochrome-c-from-mitochondria	1.35156e-74	0.820527	1	0.859	1.00894e-70	2	go-release-of-cytochrome-c-from-mitochondria
go-late-endosome-membrane	1.76329e-74	0.686924	1	0.973	1.3163e-70	2	go-late-endosome-membrane
go-negative-regulation-of-transport	2.30194e-74	0.489562	1	1	1.7184e-70	2	go-negative-regulation-of-transport
go-chemokine-production	3.22599e-74	0.950004	1	0.753	2.40821e-70	2	go-chemokine-production
go-clathrin-vesicle-coat	4.23334e-74	0.444214	0.81	0.246	3.16019e-70	2	go-clathrin-vesicle-coat
go-vacuole-organization	5.68713e-74	0.815505	1	0.96	4.24544e-70	2	go-vacuole-organization
go-wound-healing	8.59169e-74	0.67178	1	0.988	6.41369e-70	2	go-wound-healing
go-antigen-processing-and-presentation-of-peptide-antigen	3.22148e-73	0.406091	1	1	2.40483e-69	2	go-antigen-processing-and-presentation-of-peptide-antigen
go-immune-response-regulating-signaling-pathway	3.29997e-73	0.31463	1	1	2.46343e-69	2	go-immune-response-regulating-signaling-pathway
go-antigen-processing-and-presentation-of-peptide-or-polysaccharide-antigen-via-mhc-class-ii	3.85195e-73	0.763745	1	0.969	2.87548e-69	2	go-antigen-processing-and-presentation-of-peptide-or-polysaccharide-antigen-via-mhc-class-ii
go-proton-transporting-two-sector-atpase-complex-proton-transporting-domain	5.32143e-73	0.363897	0.819	0.25	3.97244e-69	2	go-proton-transporting-two-sector-atpase-complex-proton-transporting-domain
go-positive-regulation-of-protein-export-from-nucleus	2.13277e-72	0.279741	0.497	0.103	1.59211e-68	2	go-positive-regulation-of-protein-export-from-nucleus
go-regulation-of-vacuole-organization	3.32578e-72	0.698312	0.974	0.389	2.48269e-68	2	go-regulation-of-vacuole-organization
go-cytoplasmic-ubiquitin-ligase-complex	5.97844e-72	0.377921	0.348	0.047	4.4629e-68	2	go-cytoplasmic-ubiquitin-ligase-complex
go-endosome	6.34962e-72	0.35804	1	1	4.73999e-68	2	go-endosome
go-negative-regulation-of-smooth-muscle-cell-chemotaxis	8.41323e-72	0.524973	0.284	0.029	6.28048e-68	2	go-negative-regulation-of-smooth-muscle-cell-chemotaxis
go-tertiary-granule-membrane	1.39548e-71	0.820676	1	0.899	1.04173e-67	2	go-tertiary-granule-membrane
go-platelet-degranulation	2.29255e-71	0.62109	1	0.983	1.71139e-67	2	go-platelet-degranulation
go-locomotion	2.37393e-71	0.456503	1	1	1.77214e-67	2	go-locomotion
go-regulation-of-smooth-muscle-cell-chemotaxis	5.29714e-71	0.46257	0.287	0.03	3.95431e-67	2	go-regulation-of-smooth-muscle-cell-chemotaxis
go-superoxide-metabolic-process	8.40271e-71	0.839569	1	0.892	6.27262e-67	2	go-superoxide-metabolic-process
go-interleukin-1-production	8.4913e-71	0.930652	1	0.837	6.33875e-67	2	go-interleukin-1-production
go-superoxide-anion-generation	1.30719e-70	0.814952	1	0.663	9.75816e-67	2	go-superoxide-anion-generation
go-neuroinflammatory-response	1.55631e-70	0.885245	0.997	0.616	1.16178e-66	2	go-neuroinflammatory-response
go-regulation-of-secretion	1.80339e-70	0.504348	1	0.998	1.34623e-66	2	go-regulation-of-secretion
go-vesicle-organization	1.81047e-70	0.598758	1	0.994	1.35152e-66	2	go-vesicle-organization
go-cytokine-production	2.14982e-70	0.36016	1	1	1.60484e-66	2	go-cytokine-production
go-polarized-epithelial-cell-differentiation	2.88691e-70	0.299318	0.664	0.171	2.15508e-66	2	go-polarized-epithelial-cell-differentiation
go-endosomal-part	6.88039e-70	0.411352	1	1	5.13621e-66	2	go-endosomal-part
go-tumor-necrosis-factor-superfamily-cytokine-production	8.41199e-70	0.692535	1	0.99	6.27955e-66	2	go-tumor-necrosis-factor-superfamily-cytokine-production
go-smooth-muscle-cell-chemotaxis	8.41697e-70	0.407502	0.287	0.031	6.28327e-66	2	go-smooth-muscle-cell-chemotaxis
go-response-to-molecule-of-bacterial-origin	8.62405e-70	0.542611	1	0.998	6.43785e-66	2	go-response-to-molecule-of-bacterial-origin
go-negative-regulation-of-immune-system-process	1.36666e-69	0.430211	1	1	1.02021e-65	2	go-negative-regulation-of-immune-system-process
go-late-endosome	1.47588e-69	0.513517	1	0.999	1.10174e-65	2	go-late-endosome
go-negative-regulation-of-antigen-receptor-mediated-signaling-pathway	1.81009e-69	0.472102	0.825	0.27	1.35123e-65	2	go-negative-regulation-of-antigen-receptor-mediated-signaling-pathway
go-regulation-of-cell-activation	2.97268e-69	0.40425	1	1	2.21911e-65	2	go-regulation-of-cell-activation
go-positive-regulation-of-fc-receptor-mediated-stimulatory-signaling-pathway	4.38429e-69	0.446922	0.261	0.025	3.27287e-65	2	go-positive-regulation-of-fc-receptor-mediated-stimulatory-signaling-pathway
go-snap-receptor-activity	4.4691e-69	0.3524	0.687	0.191	3.33619e-65	2	go-snap-receptor-activity
go-response-to-bacterium	5.72764e-69	0.504766	1	1	4.27569e-65	2	go-response-to-bacterium
go-positive-regulation-of-secretion	7.66152e-69	0.76255	1	0.972	5.71932e-65	2	go-positive-regulation-of-secretion
go-negative-regulation-of-cytokine-production-involved-in-immune-response	8.14509e-69	0.265194	0.595	0.147	6.08031e-65	2	go-negative-regulation-of-cytokine-production-involved-in-immune-response
go-myeloid-leukocyte-differentiation	8.25517e-69	0.617973	1	0.99	6.16248e-65	2	go-myeloid-leukocyte-differentiation
go-defense-response-to-other-organism	8.65157e-68	0.60446	1	0.997	6.4584e-64	2	go-defense-response-to-other-organism
go-positive-regulation-of-signaling	9.06149e-68	0.287398	1	1	6.7644e-64	2	go-positive-regulation-of-signaling
go-nucleoside-triphosphate-catabolic-process	1.18085e-67	0.365262	0.359	0.056	8.81502e-64	2	go-nucleoside-triphosphate-catabolic-process
go-atp-hydrolysis-coupled-transmembrane-transport	2.01809e-67	0.545595	0.902	0.336	1.50651e-63	2	go-atp-hydrolysis-coupled-transmembrane-transport
go-granulocyte-differentiation	2.23649e-67	0.430044	0.828	0.269	1.66954e-63	2	go-granulocyte-differentiation
go-tissue-morphogenesis	5.87998e-67	0.838579	1	0.97	4.3894e-63	2	go-tissue-morphogenesis
go-atpase-activity-coupled-to-transmembrane-movement-of-ions-phosphorylative-mechanism	6.40917e-67	0.25417	0.77	0.222	4.78445e-63	2	go-atpase-activity-coupled-to-transmembrane-movement-of-ions-phosphorylative-mechanism
go-regulation-of-fc-receptor-mediated-stimulatory-signaling-pathway	1.06713e-66	0.639822	0.644	0.167	7.96615e-63	2	go-regulation-of-fc-receptor-mediated-stimulatory-signaling-pathway
go-response-to-axon-injury	1.07728e-66	0.881534	1	0.784	8.04192e-63	2	go-response-to-axon-injury
go-regulation-of-ion-transport	1.23296e-66	0.758718	1	0.977	9.20408e-63	2	go-regulation-of-ion-transport
go-regulation-of-cell-development	1.29185e-66	0.909683	1	0.955	9.64367e-63	2	go-regulation-of-cell-development
go-macrophage-differentiation	2.47377e-66	0.608389	0.925	0.357	1.84667e-62	2	go-macrophage-differentiation
go-proteolysis	2.63615e-66	0.322898	1	1	1.96789e-62	2	go-proteolysis
go-negative-regulation-of-cell-population-proliferation	2.91252e-66	0.79829	1	0.98	2.1742e-62	2	go-negative-regulation-of-cell-population-proliferation
go-receptor-catabolic-process	3.29414e-66	0.62948	0.948	0.384	2.45908e-62	2	go-receptor-catabolic-process
go-regulation-of-proteolysis	5.19413e-66	0.344152	1	1	3.87742e-62	2	go-regulation-of-proteolysis
go-regulation-of-endocytosis	6.51954e-66	0.822787	1	0.972	4.86684e-62	2	go-regulation-of-endocytosis
go-regulation-of-inflammatory-response	1.09967e-65	0.617656	1	0.997	8.20903e-62	2	go-regulation-of-inflammatory-response
go-regulation-of-cellular-localization	1.87248e-65	0.376224	1	1	1.39781e-61	2	go-regulation-of-cellular-localization
go-positive-regulation-of-interleukin-8-production	1.98555e-65	0.535475	0.974	0.372	1.48221e-61	2	go-positive-regulation-of-interleukin-8-production
go-positive-regulation-of-proteolysis	2.15153e-65	0.467249	1	0.998	1.60611e-61	2	go-positive-regulation-of-proteolysis
go-pigment-granule-organization	6.29225e-65	0.277483	0.724	0.211	4.69717e-61	2	go-pigment-granule-organization
go-positive-regulation-of-cytokine-secretion	6.70236e-65	0.89963	1	0.901	5.00331e-61	2	go-positive-regulation-of-cytokine-secretion
go-process-utilizing-autophagic-mechanism	6.90126e-65	0.40273	1	1	5.15179e-61	2	go-process-utilizing-autophagic-mechanism
go-negative-regulation-of-neurotransmitter-transport	1.27302e-64	0.320051	0.649	0.183	9.50312e-61	2	go-negative-regulation-of-neurotransmitter-transport
go-positive-regulation-of-cd4-positive-alpha-beta-t-cell-activation	1.69739e-64	0.489344	0.833	0.287	1.2671e-60	2	go-positive-regulation-of-cd4-positive-alpha-beta-t-cell-activation
go-regulation-of-cell-differentiation	2.15972e-64	0.359152	1	1	1.61223e-60	2	go-regulation-of-cell-differentiation
go-morphogenesis-of-an-epithelium	3.68496e-64	0.669899	1	0.99	2.75082e-60	2	go-morphogenesis-of-an-epithelium
go-establishment-of-epithelial-cell-apical-basal-polarity	5.35524e-64	0.301753	0.552	0.126	3.99768e-60	2	go-establishment-of-epithelial-cell-apical-basal-polarity
go-mhc-protein-complex-assembly	1.6342e-63	0.676384	0.891	0.268	1.21993e-59	2	go-mhc-protein-complex-assembly
go-regulation-of-calcium-ion-transport	1.84306e-63	0.799575	1	0.96	1.37585e-59	2	go-regulation-of-calcium-ion-transport
go-negative-regulation-of-cytokine-biosynthetic-process	2.20068e-63	0.515268	0.96	0.376	1.64281e-59	2	go-negative-regulation-of-cytokine-biosynthetic-process
go-negative-regulation-of-natural-killer-cell-mediated-immunity	2.52442e-63	0.408387	0.764	0.22	1.88448e-59	2	go-negative-regulation-of-natural-killer-cell-mediated-immunity
go-nlrp3-inflammasome-complex	5.49058e-63	0.494982	0.29	0.037	4.09872e-59	2	go-nlrp3-inflammasome-complex
go-positive-regulation-of-peptide-secretion	5.53925e-63	0.758026	1	0.965	4.13505e-59	2	go-positive-regulation-of-peptide-secretion
go-positive-regulation-of-focal-adhesion-assembly	1.80361e-62	0.264885	0.701	0.205	1.34639e-58	2	go-positive-regulation-of-focal-adhesion-assembly
go-isg15-protein-conjugation	2.15781e-62	0.509214	0.316	0.045	1.61081e-58	2	go-isg15-protein-conjugation
go-innate-immune-response-activating-cell-surface-receptor-signaling-pathway	2.35052e-62	0.513671	1	0.986	1.75466e-58	2	go-innate-immune-response-activating-cell-surface-receptor-signaling-pathway
go-positive-regulation-of-molecular-function	2.55966e-62	0.272931	1	1	1.91079e-58	2	go-positive-regulation-of-molecular-function
go-golgi-apparatus-part	2.65275e-62	0.482166	1	0.999	1.98027e-58	2	go-golgi-apparatus-part
go-clathrin-dependent-endocytosis	3.16735e-62	0.528944	0.899	0.334	2.36443e-58	2	go-clathrin-dependent-endocytosis
go-regulation-of-hydrolase-activity	3.90427e-62	0.328254	1	1	2.91454e-58	2	go-regulation-of-hydrolase-activity
go-positive-regulation-of-interleukin-10-production	4.0214e-62	0.561916	0.968	0.397	3.00198e-58	2	go-positive-regulation-of-interleukin-10-production
go-chemical-homeostasis	4.66053e-62	0.430739	1	1	3.47908e-58	2	go-chemical-homeostasis
go-exocytic-process	5.42708e-62	0.924413	0.997	0.564	4.05132e-58	2	go-exocytic-process
go-response-to-peptide	6.98131e-62	0.468682	1	0.998	5.21155e-58	2	go-response-to-peptide
go-positive-regulation-of-developmental-process1	7.05018e-62	0.533186	1	0.997	5.26296e-58	2	go-positive-regulation-of-developmental-process
go-endocytic-adaptor-activity	1.04347e-61	0.384859	0.293	0.039	7.78954e-58	2	go-endocytic-adaptor-activity
go-receptor-mediated-endocytosis	1.19615e-61	1.01445	1	0.849	8.92929e-58	2	go-receptor-mediated-endocytosis
go-receptor-metabolic-process	1.22061e-61	0.876655	1	0.92	9.11187e-58	2	go-receptor-metabolic-process
go-ph-reduction	1.89711e-61	0.842974	0.997	0.72	1.4162e-57	2	go-ph-reduction
go-regulation-of-exocytosis	2.23665e-61	0.810288	1	0.946	1.66966e-57	2	go-regulation-of-exocytosis
go-tertiary-granule-lumen	2.5528e-61	0.478299	1	0.986	1.90566e-57	2	go-tertiary-granule-lumen
go-signaling-receptor-binding	2.9601e-61	0.419974	1	0.999	2.20971e-57	2	go-signaling-receptor-binding
go-positive-regulation-of-immune-response	4.61502e-61	0.25607	1	1	3.44511e-57	2	go-positive-regulation-of-immune-response
go-regulation-of-cell-morphogenesis	6.78676e-61	0.715022	1	0.973	5.06632e-57	2	go-regulation-of-cell-morphogenesis
go-deoxyribonucleoside-triphosphate-catabolic-process	1.20609e-60	0.501342	0.333	0.054	9.00349e-57	2	go-deoxyribonucleoside-triphosphate-catabolic-process
go-myeloid-leukocyte-cytokine-production	2.19177e-60	0.585877	0.96	0.406	1.63616e-56	2	go-myeloid-leukocyte-cytokine-production
go-negative-regulation-of-t-cell-proliferation	5.14585e-60	0.711495	0.954	0.403	3.84138e-56	2	go-negative-regulation-of-t-cell-proliferation
go-regulation-of-protein-localization	5.27236e-60	0.304262	1	1	3.93581e-56	2	go-regulation-of-protein-localization
go-retromer-complex	6.2824e-60	0.593764	0.799	0.296	4.68981e-56	2	go-retromer-complex
go-positive-regulation-of-hypersensitivity	1.10298e-59	0.49035	0.33	0.051	8.23377e-56	2	go-positive-regulation-of-hypersensitivity
go-macroautophagy	2.09786e-59	0.508869	1	0.994	1.56605e-55	2	go-macroautophagy
go-lipid-metabolic-process	3.79703e-59	0.988502	1	0.859	2.83448e-55	2	go-lipid-metabolic-process
go-regulation-of-leukocyte-proliferation	5.31675e-59	0.387877	1	0.999	3.96896e-55	2	go-regulation-of-leukocyte-proliferation
go-cell-motility	5.94313e-59	0.396998	1	1	4.43655e-55	2	go-cell-motility
go-negative-regulation-of-oxidative-stress-induced-intrinsic-apoptotic-signaling-pathway	1.60338e-58	0.250951	0.658	0.188	1.19693e-54	2	go-negative-regulation-of-oxidative-stress-induced-intrinsic-apoptotic-signaling-pathway
go-transmembrane-receptor-protein-tyrosine-kinase-signaling-pathway	1.84241e-58	0.402812	1	1	1.37536e-54	2	go-transmembrane-receptor-protein-tyrosine-kinase-signaling-pathway
go-ap-type-membrane-coat-adaptor-complex	2.5139e-58	0.275202	0.908	0.296	1.87663e-54	2	go-ap-type-membrane-coat-adaptor-complex
go-positive-regulation-of-chemokine-production	4.72916e-58	0.766752	0.997	0.52	3.53032e-54	2	go-positive-regulation-of-chemokine-production
go-regulation-of-metal-ion-transport	8.44361e-58	0.66093	1	0.983	6.30315e-54	2	go-regulation-of-metal-ion-transport
go-platelet-morphogenesis	9.74868e-58	0.264561	0.543	0.143	7.27739e-54	2	go-platelet-morphogenesis
go-autophagosome-membrane	9.92147e-58	0.546628	0.928	0.38	7.40638e-54	2	go-autophagosome-membrane
go-membrane-raft-assembly	9.98227e-58	0.266739	0.399	0.077	7.45177e-54	2	go-membrane-raft-assembly
go-regulation-of-cell-shape	1.87849e-57	0.667406	1	0.972	1.40229e-53	2	go-regulation-of-cell-shape
go-barbed-end-actin-filament-capping	3.06571e-57	0.360762	0.724	0.229	2.28855e-53	2	go-barbed-end-actin-filament-capping
go-response-to-biotic-stimulus	3.90711e-57	0.323642	1	1	2.91666e-53	2	go-response-to-biotic-stimulus
go-positive-regulation-of-myeloid-leukocyte-mediated-immunity	4.11601e-57	0.707652	0.994	0.561	3.07261e-53	2	go-positive-regulation-of-myeloid-leukocyte-mediated-immunity
go-positive-regulation-of-antigen-processing-and-presentation	4.35853e-57	0.431982	0.376	0.069	3.25364e-53	2	go-positive-regulation-of-antigen-processing-and-presentation
go-pattern-recognition-receptor-signaling-pathway	6.67482e-57	0.441965	1	0.999	4.98275e-53	2	go-pattern-recognition-receptor-signaling-pathway
go-peptide-secretion	1.23652e-56	0.470046	1	0.998	9.23063e-53	2	go-peptide-secretion
go-reactive-oxygen-species-metabolic-process	1.55413e-56	0.527727	1	0.995	1.16016e-52	2	go-reactive-oxygen-species-metabolic-process
go-positive-regulation-of-leukocyte-apoptotic-process	2.3179e-56	0.452592	0.928	0.364	1.73031e-52	2	go-positive-regulation-of-leukocyte-apoptotic-process
go-membrane-protein-ectodomain-proteolysis	3.04904e-56	0.335511	0.805	0.268	2.27611e-52	2	go-membrane-protein-ectodomain-proteolysis
go-low-density-lipoprotein-receptor-particle-metabolic-process	3.99563e-56	0.571072	0.914	0.388	2.98274e-52	2	go-low-density-lipoprotein-receptor-particle-metabolic-process
go-negative-regulation-of-phagocytosis	4.8299e-56	0.61985	0.874	0.353	3.60552e-52	2	go-negative-regulation-of-phagocytosis
go-extracellular-matrix	1.25367e-55	0.441056	0.989	0.382	9.35862e-52	2	go-extracellular-matrix
go-protein-dimerization-activity	1.56533e-55	0.344906	1	1	1.16852e-51	2	go-protein-dimerization-activity
go-interleukin-10-production	1.79908e-55	0.740842	0.997	0.577	1.34302e-51	2	go-interleukin-10-production
go-cellular-response-to-lipid	2.3576e-55	0.47637	1	0.994	1.75995e-51	2	go-cellular-response-to-lipid
go-negative-regulation-of-protein-localization-to-cell-periphery	4.3018e-55	0.371605	0.672	0.219	3.21129e-51	2	go-negative-regulation-of-protein-localization-to-cell-periphery
go-regulation-of-regulated-secretory-pathway	6.43845e-55	0.940793	1	0.882	4.80631e-51	2	go-regulation-of-regulated-secretory-pathway
go-positive-regulation-of-tumor-necrosis-factor-superfamily-cytokine-production	7.58889e-55	0.664621	1	0.958	5.66511e-51	2	go-positive-regulation-of-tumor-necrosis-factor-superfamily-cytokine-production
go-positive-regulation-of-peptidase-activity	1.43891e-54	0.435712	1	0.997	1.07415e-50	2	go-positive-regulation-of-peptidase-activity
go-endosome-lumen	1.59177e-54	0.544962	0.983	0.438	1.18825e-50	2	go-endosome-lumen
go-negative-regulation-of-trophoblast-cell-migration	7.49433e-54	0.465001	0.348	0.062	5.59452e-50	2	go-negative-regulation-of-trophoblast-cell-migration
go-organelle-subcompartment	8.09943e-54	0.63451	1	0.974	6.04622e-50	2	go-organelle-subcompartment
go-specific-granule-lumen	1.52228e-53	0.835573	1	0.774	1.13638e-49	2	go-specific-granule-lumen
go-negative-regulation-of-lymphocyte-activation	1.64287e-53	0.656082	1	0.983	1.22641e-49	2	go-negative-regulation-of-lymphocyte-activation
go-apoptotic-mitochondrial-changes	1.76153e-53	0.591585	1	0.974	1.31499e-49	2	go-apoptotic-mitochondrial-changes
go-trans-golgi-network-transport-vesicle	2.97056e-53	0.395774	0.782	0.28	2.21752e-49	2	go-trans-golgi-network-transport-vesicle
go-response-to-peptide-hormone	4.40935e-53	0.531251	1	0.993	3.29158e-49	2	go-response-to-peptide-hormone
go-activation-of-cysteine-type-endopeptidase-activity-involved-in-apoptotic-process	4.49948e-53	0.731063	1	0.898	3.35886e-49	2	go-activation-of-cysteine-type-endopeptidase-activity-involved-in-apoptotic-process
go-regulation-of-cysteine-type-endopeptidase-activity	9.88849e-53	0.398046	1	1	7.38176e-49	2	go-regulation-of-cysteine-type-endopeptidase-activity
go-hepatocyte-apoptotic-process	1.10196e-52	0.329965	0.353	0.068	8.22616e-49	2	go-hepatocyte-apoptotic-process
go-taxis	2.00035e-52	0.617365	1	0.994	1.49326e-48	2	go-taxis
go-cadherin-binding-involved-in-cell-cell-adhesion	2.17921e-52	0.522862	0.968	0.393	1.62678e-48	2	go-cadherin-binding-involved-in-cell-cell-adhesion
go-regulation-of-cell-population-proliferation	2.97047e-52	0.286449	1	1	2.21746e-48	2	go-regulation-of-cell-population-proliferation
go-interleukin-1-beta-secretion	5.2523e-52	0.779027	0.986	0.562	3.92084e-48	2	go-interleukin-1-beta-secretion
go-cytokine-secretion	7.5523e-52	0.642893	1	0.984	5.63779e-48	2	go-cytokine-secretion
go-leukocyte-aggregation	1.03712e-51	0.618377	0.94	0.369	7.74208e-48	2	go-leukocyte-aggregation
go-granulocyte-migration	1.44778e-51	0.751381	1	0.914	1.08077e-47	2	go-granulocyte-migration
go-regulation-of-protein-homodimerization-activity	2.02468e-51	0.4505	0.75	0.274	1.51143e-47	2	go-regulation-of-protein-homodimerization-activity
go-cellular-homeostasis	2.0513e-51	0.337278	1	1	1.53129e-47	2	go-cellular-homeostasis
go-growth	2.32639e-51	0.613338	1	0.985	1.73665e-47	2	go-growth
go-mhc-class-ii-protein-complex	2.47962e-51	0.421356	0.994	0.499	1.85104e-47	2	go-mhc-class-ii-protein-complex
go-specific-granule-membrane	2.58196e-51	0.701339	1	0.929	1.92744e-47	2	go-specific-granule-membrane
go-carbohydrate-derivative-catabolic-process	3.19143e-51	0.964716	0.997	0.818	2.3824e-47	2	go-carbohydrate-derivative-catabolic-process
go-proton-transporting-v-type-atpase-complex	4.62226e-51	0.616537	0.957	0.467	3.45052e-47	2	go-proton-transporting-v-type-atpase-complex
go-production-of-molecular-mediator-involved-in-inflammatory-response	5.17145e-51	0.741703	1	0.892	3.86049e-47	2	go-production-of-molecular-mediator-involved-in-inflammatory-response
go-positive-regulation-of-inflammatory-response	5.64897e-51	0.663312	1	0.981	4.21695e-47	2	go-positive-regulation-of-inflammatory-response
go-mitochondrion-morphogenesis	9.92277e-51	0.323401	0.664	0.215	7.40734e-47	2	go-mitochondrion-morphogenesis
go-lewy-body	1.1109e-50	0.508146	0.397	0.087	8.2929e-47	2	go-lewy-body
go-negative-regulation-of-peptidase-activity	1.32013e-50	0.680462	1	0.964	9.85476e-47	2	go-negative-regulation-of-peptidase-activity
go-peptidase-activity	2.62179e-50	0.819802	0.997	0.924	1.95717e-46	2	go-peptidase-activity
go-trans-golgi-network	2.71102e-50	0.624321	1	0.968	2.02378e-46	2	go-trans-golgi-network
go-low-density-lipoprotein-particle-clearance	5.97521e-50	0.748161	0.991	0.613	4.4605e-46	2	go-low-density-lipoprotein-particle-clearance
go-perinuclear-region-of-cytoplasm	6.38141e-50	0.400048	1	0.997	4.76372e-46	2	go-perinuclear-region-of-cytoplasm
go-neutrophil-migration	7.11915e-50	0.766929	1	0.886	5.31444e-46	2	go-neutrophil-migration
go-maternal-placenta-development	1.96193e-49	0.289801	0.793	0.278	1.46458e-45	2	go-maternal-placenta-development
go-membrane-region	3.31417e-49	0.42939	1	0.996	2.47403e-45	2	go-membrane-region
go-cellular-response-to-peptide	3.46957e-49	0.463929	1	0.994	2.59003e-45	2	go-cellular-response-to-peptide
go-negative-regulation-of-tumor-necrosis-factor-superfamily-cytokine-production	3.93701e-49	0.444319	0.974	0.374	2.93898e-45	2	go-negative-regulation-of-tumor-necrosis-factor-superfamily-cytokine-production
go-extracellular-vesicle-biogenesis	3.95859e-49	0.429174	0.704	0.256	2.95509e-45	2	go-extracellular-vesicle-biogenesis
go-negative-regulation-of-phosphorus-metabolic-process	7.14368e-49	0.401825	1	0.998	5.33276e-45	2	go-negative-regulation-of-phosphorus-metabolic-process
go-response-to-lipid	1.11644e-48	0.334677	1	0.999	8.33419e-45	2	go-response-to-lipid
go-positive-regulation-of-t-cell-migration	1.26359e-48	0.445946	0.989	0.431	9.43268e-45	2	go-positive-regulation-of-t-cell-migration
go-negative-regulation-of-b-cell-activation	1.31507e-48	0.547445	0.954	0.445	9.81699e-45	2	go-negative-regulation-of-b-cell-activation
go-regulation-of-chemokine-c-x-c-motif-ligand-2-production	2.18878e-48	0.422314	0.388	0.086	1.63392e-44	2	go-regulation-of-chemokine-c-x-c-motif-ligand-2-production
go-negative-regulation-of-response-to-stimulus	3.16343e-48	0.269308	1	1	2.3615e-44	2	go-negative-regulation-of-response-to-stimulus
go-deoxyribose-phosphate-catabolic-process	3.4437e-48	0.317958	0.483	0.138	2.57072e-44	2	go-deoxyribose-phosphate-catabolic-process
go-regulation-of-superoxide-metabolic-process	5.15875e-48	0.645109	1	0.751	3.85101e-44	2	go-regulation-of-superoxide-metabolic-process
go-regulation-of-viral-entry-into-host-cell	5.64469e-48	0.608028	1	0.766	4.21376e-44	2	go-regulation-of-viral-entry-into-host-cell
go-rage-receptor-binding	6.58023e-48	0.561032	0.945	0.39	4.91215e-44	2	go-rage-receptor-binding
go-positive-regulation-of-myeloid-leukocyte-cytokine-production-involved-in-immune-response	1.12411e-47	0.324242	0.853	0.311	8.3915e-44	2	go-positive-regulation-of-myeloid-leukocyte-cytokine-production-involved-in-immune-response
go-mast-cell-granule	1.64096e-47	0.379766	0.825	0.324	1.22498e-43	2	go-mast-cell-granule
go-negative-regulation-of-hydrolase-activity	2.7778e-47	0.587346	1	0.985	2.07363e-43	2	go-negative-regulation-of-hydrolase-activity
go-negative-regulation-of-secretion	4.33138e-47	0.673732	1	0.983	3.23338e-43	2	go-negative-regulation-of-secretion
go-regulation-of-phosphorus-metabolic-process	5.74121e-47	0.27597	1	1	4.28582e-43	2	go-regulation-of-phosphorus-metabolic-process
go-organic-acid-metabolic-process	7.47524e-47	0.5185	1	0.987	5.58027e-43	2	go-organic-acid-metabolic-process
go-negative-regulation-of-signaling	7.58852e-47	0.284749	1	1	5.66483e-43	2	go-negative-regulation-of-signaling
go-positive-regulation-of-acute-inflammatory-response-to-antigenic-stimulus	9.07483e-47	0.516504	0.773	0.239	6.77436e-43	2	go-positive-regulation-of-acute-inflammatory-response-to-antigenic-stimulus
go-lipopolysaccharide-mediated-signaling-pathway	9.27807e-47	0.781135	0.997	0.767	6.92608e-43	2	go-lipopolysaccharide-mediated-signaling-pathway
go-lytic-vacuole-organization	1.03388e-46	0.788388	1	0.778	7.71792e-43	2	go-lytic-vacuole-organization
go-negative-regulation-of-apoptotic-signaling-pathway	1.16218e-46	0.400162	1	0.997	8.67567e-43	2	go-negative-regulation-of-apoptotic-signaling-pathway
go-negative-regulation-of-exocytosis	1.99613e-46	0.59439	0.963	0.486	1.49011e-42	2	go-negative-regulation-of-exocytosis
go-organelle-localization	2.01727e-46	0.429887	1	0.999	1.50589e-42	2	go-organelle-localization
go-macrophage-activation	2.24069e-46	0.7422	1	0.928	1.67267e-42	2	go-macrophage-activation
go-fatty-acid-derivative-binding	2.4053e-46	0.295068	0.819	0.308	1.79556e-42	2	go-fatty-acid-derivative-binding
go-oxidoreductase-activity-acting-on-a-sulfur-group-of-donors	2.57549e-46	0.675096	1	0.862	1.92261e-42	2	go-oxidoreductase-activity-acting-on-a-sulfur-group-of-donors
go-actin-cytoskeleton-reorganization	2.77751e-46	0.712251	1	0.932	2.07341e-42	2	go-actin-cytoskeleton-reorganization
go-establishment-of-endothelial-barrier	4.27317e-46	0.256357	0.79	0.28	3.18992e-42	2	go-establishment-of-endothelial-barrier
go-negative-regulation-of-cytokine-production	4.48077e-46	0.433682	1	0.995	3.34489e-42	2	go-negative-regulation-of-cytokine-production
go-lipid-binding	5.52778e-46	0.859882	1	0.929	4.12649e-42	2	go-lipid-binding
go-toll-like-receptor-signaling-pathway	5.57377e-46	0.365035	1	0.999	4.16082e-42	2	go-toll-like-receptor-signaling-pathway
go-clathrin-coated-endocytic-vesicle-membrane	6.2e-46	0.547802	0.997	0.655	4.6283e-42	2	go-clathrin-coated-endocytic-vesicle-membrane
go-platelet-alpha-granule-lumen	6.50105e-46	0.694762	1	0.821	4.85304e-42	2	go-platelet-alpha-granule-lumen
go-myeloid-leukocyte-migration	9.9954e-46	0.572587	1	0.994	7.46156e-42	2	go-myeloid-leukocyte-migration
go-positive-regulation-of-locomotion	1.0702e-45	0.459353	1	0.999	7.98907e-42	2	go-positive-regulation-of-locomotion
go-positive-regulation-of-reactive-oxygen-species-metabolic-process	1.76483e-45	0.621229	1	0.835	1.31745e-41	2	go-positive-regulation-of-reactive-oxygen-species-metabolic-process
go-golgi-membrane	2.29607e-45	0.385065	1	0.999	1.71402e-41	2	go-golgi-membrane
go-small-gtpase-mediated-signal-transduction	2.95962e-45	0.615803	1	0.983	2.20935e-41	2	go-small-gtpase-mediated-signal-transduction
go-protease-binding	3.0392e-45	0.579998	1	0.976	2.26876e-41	2	go-protease-binding
go-clathrin-coated-endocytic-vesicle	4.42398e-45	0.587615	0.997	0.741	3.3025e-41	2	go-clathrin-coated-endocytic-vesicle
go-regulation-of-superoxide-anion-generation	5.57085e-45	0.627569	1	0.615	4.15864e-41	2	go-regulation-of-superoxide-anion-generation
go-regulation-of-lipopolysaccharide-mediated-signaling-pathway	6.33732e-45	0.417101	0.787	0.317	4.73081e-41	2	go-regulation-of-lipopolysaccharide-mediated-signaling-pathway
go-positive-regulation-of-nad-p-h-oxidase-activity	1.16583e-44	0.497339	0.549	0.154	8.70289e-41	2	go-positive-regulation-of-nad-p-h-oxidase-activity
go-regulation-of-nad-p-h-oxidase-activity	1.61337e-44	0.376054	0.549	0.154	1.20438e-40	2	go-regulation-of-nad-p-h-oxidase-activity
go-positive-regulation-of-nitric-oxide-biosynthetic-process	1.64297e-44	0.683273	0.986	0.558	1.22648e-40	2	go-positive-regulation-of-nitric-oxide-biosynthetic-process
go-regulation-of-cellular-component-movement	1.65236e-44	0.42089	1	1	1.23349e-40	2	go-regulation-of-cellular-component-movement
go-defense-response-to-bacterium	1.80654e-44	0.802333	1	0.87	1.34858e-40	2	go-defense-response-to-bacterium
go-regulation-of-leukocyte-migration	4.19009e-44	0.504609	1	0.994	3.1279e-40	2	go-regulation-of-leukocyte-migration
go-leukocyte-proliferation	6.73054e-44	0.313756	1	1	5.02435e-40	2	go-leukocyte-proliferation
go-positive-regulation-of-lymphocyte-migration	9.19067e-44	0.480197	0.994	0.488	6.86083e-40	2	go-positive-regulation-of-lymphocyte-migration
go-neuron-apoptotic-process	9.78874e-44	0.592628	1	0.978	7.3073e-40	2	go-neuron-apoptotic-process
go-cellular-response-to-interferon-beta	1.13679e-43	0.289231	0.724	0.263	8.48612e-40	2	go-cellular-response-to-interferon-beta
go-positive-regulation-of-cell-development	1.38954e-43	0.897878	1	0.906	1.03729e-39	2	go-positive-regulation-of-cell-development
go-ion-transport	1.67139e-43	0.318842	1	1	1.24769e-39	2	go-ion-transport
go-positive-regulation-of-cell-differentiation	3.12511e-43	0.392901	1	0.998	2.33289e-39	2	go-positive-regulation-of-cell-differentiation
go-positive-regulation-of-ryanodine-sensitive-calcium-release-channel-activity1	3.39392e-43	0.511854	0.695	0.222	2.53356e-39	2	go-positive-regulation-of-ryanodine-sensitive-calcium-release-channel-activity
go-actin-filament-based-process	3.47153e-43	0.271093	1	1	2.5915e-39	2	go-actin-filament-based-process
go-coagulation	3.95157e-43	0.502248	1	0.993	2.94985e-39	2	go-coagulation
go-post-translational-protein-modification	4.33547e-43	0.482819	1	0.989	3.23643e-39	2	go-post-translational-protein-modification
go-protein-maturation	6.54809e-43	0.597773	1	0.96	4.88815e-39	2	go-protein-maturation
go-membrane-protein-proteolysis	6.87785e-43	0.624606	0.957	0.452	5.13431e-39	2	go-membrane-protein-proteolysis
go-interleukin-8-production	7.24403e-43	0.760865	1	0.841	5.40767e-39	2	go-interleukin-8-production
go-trans-golgi-network-membrane	1.26979e-42	0.581427	1	0.878	9.47898e-39	2	go-trans-golgi-network-membrane
go-phagosome-acidification	1.41186e-42	0.580062	0.963	0.522	1.05395e-38	2	go-phagosome-acidification
go-protein-kinase-b-binding	1.58771e-42	0.336245	0.371	0.089	1.18523e-38	2	go-protein-kinase-b-binding
go-regulation-of-intracellular-transport	1.85757e-42	0.378448	1	0.997	1.38668e-38	2	go-regulation-of-intracellular-transport
go-positive-regulation-of-cytokine-production	1.91093e-42	0.272977	1	1	1.42651e-38	2	go-positive-regulation-of-cytokine-production
go-membrane-organization	2.37715e-42	0.256161	1	1	1.77455e-38	2	go-membrane-organization
go-erk1-and-erk2-cascade	2.40104e-42	0.605304	1	0.988	1.79238e-38	2	go-erk1-and-erk2-cascade
go-metal-ion-transport	2.41343e-42	0.610758	1	0.995	1.80163e-38	2	go-metal-ion-transport
go-negative-regulation-of-protein-localization-to-membrane	2.81447e-42	0.315763	0.756	0.292	2.101e-38	2	go-negative-regulation-of-protein-localization-to-membrane
go-regulation-of-acute-inflammatory-response-to-antigenic-stimulus	2.89677e-42	0.258873	0.776	0.25	2.16244e-38	2	go-regulation-of-acute-inflammatory-response-to-antigenic-stimulus
go-protein-localization-to-plasma-membrane	3.59387e-42	0.582763	1	0.982	2.68282e-38	2	go-protein-localization-to-plasma-membrane
go-leukocyte-migration	3.59522e-42	0.379071	1	1	2.68383e-38	2	go-leukocyte-migration
go-negative-regulation-of-immune-response	3.8423e-42	0.507689	1	0.991	2.86828e-38	2	go-negative-regulation-of-immune-response
go-positive-regulation-of-cellular-component-organization	3.90885e-42	0.25842	1	1	2.91796e-38	2	go-positive-regulation-of-cellular-component-organization
go-positive-regulation-of-superoxide-anion-generation	7.48725e-42	0.544954	1	0.581	5.58923e-38	2	go-positive-regulation-of-superoxide-anion-generation
go-neurogenesis	7.78166e-42	0.655087	1	0.983	5.80901e-38	2	go-neurogenesis
go-rac-protein-signal-transduction	1.49367e-41	0.61419	0.997	0.665	1.11503e-37	2	go-rac-protein-signal-transduction
go-thioesterase-binding	2.28498e-41	0.279478	0.402	0.102	1.70574e-37	2	go-thioesterase-binding
go-escrt-iii-complex	2.31231e-41	0.437916	0.5	0.149	1.72614e-37	2	go-escrt-iii-complex
go-protein-processing	2.81276e-41	0.681353	1	0.94	2.09973e-37	2	go-protein-processing
go-extrinsic-component-of-membrane	2.84746e-41	0.717064	1	0.95	2.12563e-37	2	go-extrinsic-component-of-membrane
go-cellular-response-to-peptide-hormone-stimulus	4.84153e-41	0.541887	1	0.987	3.6142e-37	2	go-cellular-response-to-peptide-hormone-stimulus
go-mitochondrion-organization	5.35335e-41	0.262617	1	1	3.99628e-37	2	go-mitochondrion-organization
go-negative-regulation-of-smooth-muscle-cell-proliferation	5.62312e-41	0.329285	0.968	0.377	4.19766e-37	2	go-negative-regulation-of-smooth-muscle-cell-proliferation
go-cellular-response-to-external-stimulus	6.02481e-41	0.4573	1	0.995	4.49752e-37	2	go-cellular-response-to-external-stimulus
go-protein-localization-to-cell-periphery	7.598e-41	0.634817	1	0.973	5.67191e-37	2	go-protein-localization-to-cell-periphery
go-regulation-of-osteoclast-differentiation	8.45736e-41	0.668903	0.997	0.517	6.31342e-37	2	go-regulation-of-osteoclast-differentiation
go-macrophage-chemotaxis	9.05601e-41	0.259973	0.836	0.32	6.76031e-37	2	go-macrophage-chemotaxis
go-cellular-chemical-homeostasis	1.01282e-40	0.337562	1	1	7.56073e-37	2	go-cellular-chemical-homeostasis
go-negative-regulation-of-catalytic-activity	1.40925e-40	0.262188	1	1	1.05201e-36	2	go-negative-regulation-of-catalytic-activity
go-regulation-of-myeloid-leukocyte-differentiation	1.8298e-40	0.574297	1	0.98	1.36595e-36	2	go-regulation-of-myeloid-leukocyte-differentiation
go-regulation-of-growth	2.55034e-40	0.648383	1	0.977	1.90383e-36	2	go-regulation-of-growth
go-interleukin-8-secretion	2.98385e-40	0.570171	0.989	0.597	2.22744e-36	2	go-interleukin-8-secretion
go-response-to-interferon-gamma	3.4318e-40	0.264215	1	1	2.56184e-36	2	go-response-to-interferon-gamma
go-rna-polymerase-ii-transcription-factor-binding	3.45317e-40	0.31279	0.925	0.358	2.5778e-36	2	go-rna-polymerase-ii-transcription-factor-binding
go-regulation-of-ryanodine-sensitive-calcium-release-channel-activity	4.80407e-40	0.467007	0.957	0.467	3.58623e-36	2	go-regulation-of-ryanodine-sensitive-calcium-release-channel-activity
go-cellular-defense-response	7.0393e-40	0.59578	0.983	0.539	5.25484e-36	2	go-cellular-defense-response
go-response-to-insulin	1.46673e-39	0.623086	1	0.978	1.09491e-35	2	go-response-to-insulin
go-positive-regulation-of-adherens-junction-organization	1.56838e-39	0.361046	0.874	0.373	1.1708e-35	2	go-positive-regulation-of-adherens-junction-organization
go-peptidase-regulator-activity	1.65508e-39	0.685344	1	0.943	1.23552e-35	2	go-peptidase-regulator-activity
go-positive-regulation-of-protein-homodimerization-activity	1.84134e-39	0.318105	0.273	0.054	1.37456e-35	2	go-positive-regulation-of-protein-homodimerization-activity
go-extrinsic-apoptotic-signaling-pathway	1.986e-39	0.53883	1	0.979	1.48255e-35	2	go-extrinsic-apoptotic-signaling-pathway
go-b-cell-apoptotic-process	2.04926e-39	0.489293	0.865	0.411	1.52977e-35	2	go-b-cell-apoptotic-process
go-b-cell-homeostasis	2.13878e-39	0.572107	0.951	0.516	1.5966e-35	2	go-b-cell-homeostasis
go-cellular-component-disassembly	2.42329e-39	0.321435	1	1	1.80898e-35	2	go-cellular-component-disassembly
go-positive-regulation-of-establishment-of-protein-localization	2.45173e-39	0.31521	1	1	1.83021e-35	2	go-positive-regulation-of-establishment-of-protein-localization
go-cell-cortex-region	2.55836e-39	0.252333	0.882	0.335	1.90982e-35	2	go-cell-cortex-region
go-circulatory-system-development	2.58779e-39	0.966057	0.997	0.785	1.93179e-35	2	go-circulatory-system-development
go-negative-regulation-of-defense-response	3.06108e-39	0.665665	1	0.979	2.2851e-35	2	go-negative-regulation-of-defense-response
go-regulation-of-monocyte-chemotaxis	3.65206e-39	0.34041	0.928	0.412	2.72626e-35	2	go-regulation-of-monocyte-chemotaxis
go-escrt-complex	5.18215e-39	0.461185	0.859	0.394	3.86847e-35	2	go-escrt-complex
go-rac-gtpase-binding	9.4873e-39	0.791334	0.997	0.791	7.08227e-35	2	go-rac-gtpase-binding
go-trapp-complex	1.1339e-38	0.287948	0.287	0.061	8.46453e-35	2	go-trapp-complex
go-positive-regulation-of-interleukin-4-production	1.14687e-38	0.508577	0.986	0.52	8.56135e-35	2	go-positive-regulation-of-interleukin-4-production
go-regulation-of-cell-projection-organization	1.49042e-38	0.640393	1	0.986	1.1126e-34	2	go-regulation-of-cell-projection-organization
go-negative-regulation-of-membrane-potential	1.69228e-38	0.269004	0.351	0.086	1.26328e-34	2	go-negative-regulation-of-membrane-potential
go-amine-metabolic-process	2.39616e-38	0.374302	1	0.991	1.78873e-34	2	go-amine-metabolic-process
go-ras-protein-signal-transduction	2.57975e-38	0.530843	1	0.989	1.92578e-34	2	go-ras-protein-signal-transduction
go-establishment-of-epithelial-cell-polarity	2.95902e-38	0.253577	0.767	0.3	2.20891e-34	2	go-establishment-of-epithelial-cell-polarity
go-transferrin-transport	3.52121e-38	0.572252	0.966	0.545	2.62859e-34	2	go-transferrin-transport
go-clathrin-coat	4.67012e-38	0.29713	0.885	0.352	3.48624e-34	2	go-clathrin-coat
go-proteasome-core-complex-alpha-subunit-complex	8.17975e-38	0.49019	0.563	0.184	6.10619e-34	2	go-proteasome-core-complex-alpha-subunit-complex
go-membrane-docking	1.20061e-37	0.689022	1	0.943	8.96258e-34	2	go-membrane-docking
go-atpase-activity-coupled-to-transmembrane-movement-of-ions-rotational-mechanism	1.20118e-37	0.49268	0.96	0.501	8.96678e-34	2	go-atpase-activity-coupled-to-transmembrane-movement-of-ions-rotational-mechanism
go-establishment-of-organelle-localization	1.30985e-37	0.394085	1	0.997	9.77801e-34	2	go-establishment-of-organelle-localization
go-divalent-inorganic-cation-transport	1.34899e-37	0.684274	1	0.974	1.00702e-33	2	go-divalent-inorganic-cation-transport
go-mitochondrial-respiratory-chain-complex-iv-assembly	1.54163e-37	0.384434	0.693	0.279	1.15083e-33	2	go-mitochondrial-respiratory-chain-complex-iv-assembly
go-proton-exporting-atpase-activity	1.60921e-37	0.470478	0.954	0.482	1.20127e-33	2	go-proton-exporting-atpase-activity
go-trophoblast-cell-migration	1.97172e-37	0.306008	0.644	0.209	1.47189e-33	2	go-trophoblast-cell-migration
go-regulation-of-respiratory-burst	1.98193e-37	0.298203	0.917	0.349	1.47951e-33	2	go-regulation-of-respiratory-burst
go-mature-b-cell-differentiation	2.80299e-37	0.330173	0.761	0.316	2.09243e-33	2	go-mature-b-cell-differentiation
go-coated-membrane	4.34379e-37	0.770348	1	0.855	3.24264e-33	2	go-coated-membrane
go-morphogenesis-of-a-polarized-epithelium	4.88947e-37	0.365035	1	0.995	3.64999e-33	2	go-morphogenesis-of-a-polarized-epithelium
go-cellular-metabolic-compound-salvage	5.252e-37	0.538123	0.943	0.48	3.92062e-33	2	go-cellular-metabolic-compound-salvage
go-regulation-of-mitochondrion-organization	6.87474e-37	0.413949	1	0.989	5.13199e-33	2	go-regulation-of-mitochondrion-organization
go-positive-regulation-of-transcription-from-rna-polymerase-ii-promoter-in-response-to-endoplasmic-reticulum-stress	7.70593e-37	0.283345	0.336	0.082	5.75248e-33	2	go-positive-regulation-of-transcription-from-rna-polymerase-ii-promoter-in-response-to-endoplasmic-reticulum-stress
go-liposaccharide-metabolic-process	7.76649e-37	0.262221	0.882	0.342	5.79769e-33	2	go-liposaccharide-metabolic-process
go-regulation-of-cation-transmembrane-transport	9.43126e-37	0.617478	1	0.978	7.04044e-33	2	go-regulation-of-cation-transmembrane-transport
go-negative-regulation-of-erythrocyte-differentiation	9.53659e-37	0.309062	0.299	0.068	7.11906e-33	2	go-negative-regulation-of-erythrocyte-differentiation
go-regulation-of-mitotic-spindle-assembly	1.26173e-36	0.28046	0.664	0.254	9.4188e-33	2	go-regulation-of-mitotic-spindle-assembly
go-regulation-of-b-cell-apoptotic-process	1.30239e-36	0.366225	0.83	0.348	9.72238e-33	2	go-regulation-of-b-cell-apoptotic-process
go-endoplasmic-reticulum-calcium-ion-homeostasis	1.55279e-36	0.382827	0.776	0.337	1.15916e-32	2	go-endoplasmic-reticulum-calcium-ion-homeostasis
go-extrinsic-component-of-plasma-membrane	1.56341e-36	0.710062	1	0.926	1.16708e-32	2	go-extrinsic-component-of-plasma-membrane
go-antibiotic-catabolic-process	1.92842e-36	0.325161	0.928	0.387	1.43957e-32	2	go-antibiotic-catabolic-process
go-phagosome-maturation	2.95116e-36	0.641688	0.989	0.761	2.20304e-32	2	go-phagosome-maturation
go-positive-regulation-of-neuron-apoptotic-process	3.16188e-36	0.651336	1	0.787	2.36034e-32	2	go-positive-regulation-of-neuron-apoptotic-process
go-negative-regulation-of-cell-adhesion	3.46101e-36	0.589024	1	0.991	2.58365e-32	2	go-negative-regulation-of-cell-adhesion
go-vesicle-docking	6.04504e-36	0.460308	0.925	0.403	4.51262e-32	2	go-vesicle-docking
go-regulation-of-immune-effector-process	7.15089e-36	0.282048	1	1	5.33814e-32	2	go-regulation-of-immune-effector-process
go-t-cell-proliferation	1.01104e-35	0.296222	1	0.999	7.54739e-32	2	go-t-cell-proliferation
go-response-to-carbohydrate	1.4883e-35	0.600214	1	0.98	1.11102e-31	2	go-response-to-carbohydrate
go-defense-response-to-virus	1.54901e-35	0.492775	1	0.986	1.15634e-31	2	go-defense-response-to-virus
go-regulation-of-peptide-secretion	1.55637e-35	0.344357	1	0.998	1.16183e-31	2	go-regulation-of-peptide-secretion
go-signal-peptide-processing	1.80892e-35	0.281963	0.486	0.149	1.35036e-31	2	go-signal-peptide-processing
go-interleukin-1-secretion	1.82364e-35	0.696366	0.986	0.562	1.36135e-31	2	go-interleukin-1-secretion
go-positive-regulation-of-phagocytosis	1.8409e-35	0.637064	1	0.872	1.37423e-31	2	go-positive-regulation-of-phagocytosis
go-protein-homodimerization-activity	2.13693e-35	0.307665	1	0.999	1.59522e-31	2	go-protein-homodimerization-activity
go-ruffle	2.15074e-35	0.381205	1	1	1.60553e-31	2	go-ruffle
go-proteasome-assembly	2.3376e-35	0.333125	0.448	0.138	1.74502e-31	2	go-proteasome-assembly
go-regulation-of-mononuclear-cell-migration	2.39054e-35	0.644059	0.994	0.646	1.78454e-31	2	go-regulation-of-mononuclear-cell-migration
go-animal-organ-morphogenesis	3.32877e-35	0.827644	0.997	0.912	2.48493e-31	2	go-animal-organ-morphogenesis
go-negative-regulation-of-response-to-external-stimulus	3.80004e-35	0.797314	1	0.922	2.83673e-31	2	go-negative-regulation-of-response-to-external-stimulus
go-cellular-component-morphogenesis	4.9232e-35	0.456347	1	0.992	3.67517e-31	2	go-cellular-component-morphogenesis
go-viral-budding-via-host-escrt-complex	6.20554e-35	0.454887	0.853	0.404	4.63243e-31	2	go-viral-budding-via-host-escrt-complex
go-cell-growth	8.86816e-35	0.55584	1	0.987	6.62008e-31	2	go-cell-growth
go-myeloid-cell-differentiation	1.02063e-34	0.256806	1	1	7.61899e-31	2	go-myeloid-cell-differentiation
go-clathrin-coated-pit	1.16841e-34	0.66146	0.986	0.552	8.72221e-31	2	go-clathrin-coated-pit
go-positive-regulation-of-regulated-secretory-pathway	1.51141e-34	0.537392	0.991	0.534	1.12827e-30	2	go-positive-regulation-of-regulated-secretory-pathway
go-extrinsic-apoptotic-signaling-pathway-via-death-domain-receptors	1.56254e-34	0.652865	1	0.884	1.16644e-30	2	go-extrinsic-apoptotic-signaling-pathway-via-death-domain-receptors
go-positive-regulation-of-granulocyte-differentiation	1.84922e-34	0.346987	0.342	0.088	1.38044e-30	2	go-positive-regulation-of-granulocyte-differentiation
go-hypersensitivity	2.31775e-34	0.314558	0.353	0.093	1.7302e-30	2	go-hypersensitivity
go-carbohydrate-metabolic-process	2.6764e-34	0.74421	1	0.943	1.99793e-30	2	go-carbohydrate-metabolic-process
go-lamellipodium	4.27897e-34	0.367776	1	0.998	3.19425e-30	2	go-lamellipodium
go-endoplasmic-reticulum-golgi-intermediate-compartment-membrane	5.38529e-34	0.681675	1	0.804	4.02012e-30	2	go-endoplasmic-reticulum-golgi-intermediate-compartment-membrane
go-regulation-of-b-cell-proliferation	8.5242e-34	0.675014	1	0.778	6.36331e-30	2	go-regulation-of-b-cell-proliferation
go-peptide-disulfide-oxidoreductase-activity1	8.96487e-34	0.329894	0.799	0.318	6.69228e-30	2	go-peptide-disulfide-oxidoreductase-activity
go-polyamine-biosynthetic-process	1.47757e-33	0.349892	0.83	0.317	1.10301e-29	2	go-polyamine-biosynthetic-process
go-positive-regulation-of-sequestering-of-calcium-ion1	1.74236e-33	0.320576	0.876	0.361	1.30067e-29	2	go-positive-regulation-of-sequestering-of-calcium-ion
go-positive-regulation-of-cysteine-type-endopeptidase-activity	2.01852e-33	0.389788	1	0.994	1.50682e-29	2	go-positive-regulation-of-cysteine-type-endopeptidase-activity
go-negative-regulation-of-protein-serine-threonine-kinase-activity	2.45954e-33	0.789273	1	0.916	1.83605e-29	2	go-negative-regulation-of-protein-serine-threonine-kinase-activity
go-regulation-of-reactive-oxygen-species-metabolic-process	2.81097e-33	0.468051	1	0.974	2.09839e-29	2	go-regulation-of-reactive-oxygen-species-metabolic-process
go-myeloid-dendritic-cell-activation	3.29576e-33	0.387707	0.905	0.434	2.46029e-29	2	go-myeloid-dendritic-cell-activation
go-positive-regulation-of-leukocyte-migration	4.00795e-33	0.526284	1	0.977	2.99194e-29	2	go-positive-regulation-of-leukocyte-migration
go-regulation-of-lipid-metabolic-process	4.06735e-33	0.712155	1	0.947	3.03628e-29	2	go-regulation-of-lipid-metabolic-process
go-protein-phosphatase-type-1-complex1	6.11703e-33	0.360487	0.497	0.161	4.56636e-29	2	go-protein-phosphatase-type-1-complex
go-defense-response-to-fungus	8.01622e-33	0.254915	0.989	0.458	5.9841e-29	2	go-defense-response-to-fungus
go-zymogen-activation	1.53389e-32	0.496451	0.983	0.492	1.14505e-28	2	go-zymogen-activation
go-viral-budding	1.64222e-32	0.480266	0.882	0.46	1.22592e-28	2	go-viral-budding
go-vascular-endothelial-growth-factor-receptor-signaling-pathway	2.64641e-32	0.616627	1	0.925	1.97554e-28	2	go-vascular-endothelial-growth-factor-receptor-signaling-pathway
go-positive-regulation-of-extrinsic-apoptotic-signaling-pathway	4.18625e-32	0.639757	0.994	0.684	3.12504e-28	2	go-positive-regulation-of-extrinsic-apoptotic-signaling-pathway
go-endosome-transport-via-multivesicular-body-sorting-pathway	5.86763e-32	0.451114	0.879	0.444	4.38019e-28	2	go-endosome-transport-via-multivesicular-body-sorting-pathway
go-midbody-abscission	1.09338e-31	0.274373	0.704	0.281	8.16212e-28	2	go-midbody-abscission
go-regulation-of-extrinsic-apoptotic-signaling-pathway	1.21582e-31	0.553473	1	0.956	9.07612e-28	2	go-regulation-of-extrinsic-apoptotic-signaling-pathway
go-positive-regulation-of-cell-activation	1.74474e-31	0.279565	1	1	1.30245e-27	2	go-positive-regulation-of-cell-activation
go-proteasome-regulatory-particle-base-subcomplex1	2.56558e-31	0.335271	0.503	0.171	1.91521e-27	2	go-proteasome-regulatory-particle-base-subcomplex
go-golgi-vesicle-transport	2.62202e-31	0.447006	1	0.989	1.95734e-27	2	go-golgi-vesicle-transport
go-negative-regulation-of-ryanodine-sensitive-calcium-release-channel-activity1	2.99656e-31	0.435112	0.807	0.314	2.23693e-27	2	go-negative-regulation-of-ryanodine-sensitive-calcium-release-channel-activity
go-spermatoproteasome-complex	4.91292e-31	0.385742	0.368	0.105	3.66749e-27	2	go-spermatoproteasome-complex
go-small-molecule-biosynthetic-process	7.00633e-31	0.465818	1	0.99	5.23022e-27	2	go-small-molecule-biosynthetic-process
go-vesicle-budding-from-membrane	9.15572e-31	0.485358	1	0.958	6.83474e-27	2	go-vesicle-budding-from-membrane
go-fc-receptor-mediated-stimulatory-signaling-pathway	9.36766e-31	0.295564	1	0.997	6.99296e-27	2	go-fc-receptor-mediated-stimulatory-signaling-pathway
go-positive-regulation-of-response-to-external-stimulus	1.04516e-30	0.345207	1	0.999	7.80211e-27	2	go-positive-regulation-of-response-to-external-stimulus
go-interferon-beta-production	1.12215e-30	0.516156	0.96	0.483	8.37688e-27	2	go-interferon-beta-production
go-regulation-of-actin-cytoskeleton-reorganization	1.28282e-30	0.557996	0.997	0.702	9.57629e-27	2	go-regulation-of-actin-cytoskeleton-reorganization
go-ion-homeostasis	1.32081e-30	0.31129	1	1	9.85988e-27	2	go-ion-homeostasis
go-biological-adhesion	1.72047e-30	0.297054	1	1	1.28433e-26	2	go-biological-adhesion
go-actin-filament-severing	1.74084e-30	0.334127	0.402	0.124	1.29954e-26	2	go-actin-filament-severing
go-positive-regulation-of-inflammatory-response-to-antigenic-stimulus	2.16225e-30	0.342771	0.784	0.284	1.61412e-26	2	go-positive-regulation-of-inflammatory-response-to-antigenic-stimulus
go-cell-projection-organization	2.54224e-30	0.374976	1	0.996	1.89778e-26	2	go-cell-projection-organization
go-myeloid-cell-apoptotic-process	2.57295e-30	0.393421	0.922	0.46	1.92071e-26	2	go-myeloid-cell-apoptotic-process
go-regulation-of-protein-folding	2.67269e-30	0.288097	0.365	0.107	1.99516e-26	2	go-regulation-of-protein-folding
go-negative-regulation-of-mitochondrion-organization	2.9253e-30	0.467241	0.997	0.507	2.18373e-26	2	go-negative-regulation-of-mitochondrion-organization
go-regulation-of-establishment-of-planar-polarity	3.29598e-30	0.314626	1	0.993	2.46045e-26	2	go-regulation-of-establishment-of-planar-polarity
go-regulation-of-body-fluid-levels	3.70491e-30	0.401249	1	0.996	2.76571e-26	2	go-regulation-of-body-fluid-levels
go-cellular-ketone-metabolic-process	6.83683e-30	0.409078	1	0.992	5.10369e-26	2	go-cellular-ketone-metabolic-process
go-endoplasmic-reticulum-lumen	7.75432e-30	0.793808	1	0.861	5.7886e-26	2	go-endoplasmic-reticulum-lumen
go-nitric-oxide-biosynthetic-process	9.39087e-30	0.7067	1	0.8	7.01029e-26	2	go-nitric-oxide-biosynthetic-process
go-actin-filament-bundle-organization	9.78208e-30	0.632883	1	0.959	7.30232e-26	2	go-actin-filament-bundle-organization
go-copi-coated-vesicle	1.03898e-29	0.424142	0.839	0.429	7.756e-26	2	go-copi-coated-vesicle
go-glycosyl-compound-biosynthetic-process	1.1944e-29	0.55354	0.983	0.584	8.91619e-26	2	go-glycosyl-compound-biosynthetic-process
go-ion-channel-binding	1.29026e-29	0.536297	1	0.951	9.6318e-26	2	go-ion-channel-binding
go-cellular-ion-homeostasis	1.67442e-29	0.298483	1	1	1.24996e-25	2	go-cellular-ion-homeostasis
go-cellular-response-to-arsenic-containing-substance	1.70151e-29	0.264584	0.807	0.349	1.27018e-25	2	go-cellular-response-to-arsenic-containing-substance
go-organophosphate-metabolic-process	2.89367e-29	0.586981	1	0.97	2.16012e-25	2	go-organophosphate-metabolic-process
go-regulation-of-cellular-ketone-metabolic-process	3.54945e-29	0.396887	1	0.985	2.64967e-25	2	go-regulation-of-cellular-ketone-metabolic-process
go-peptidase-activator-activity	5.71126e-29	0.547029	0.991	0.703	4.26346e-25	2	go-peptidase-activator-activity
go-negative-regulation-of-type-i-interferon-production	7.10514e-29	0.545244	0.986	0.625	5.30398e-25	2	go-negative-regulation-of-type-i-interferon-production
go-regulation-of-morphogenesis-of-an-epithelium	7.98634e-29	0.380079	1	0.993	5.9618e-25	2	go-regulation-of-morphogenesis-of-an-epithelium
go-leading-edge-membrane	1.07261e-28	0.597106	1	0.989	8.00705e-25	2	go-leading-edge-membrane
go-positive-regulation-of-phosphorus-metabolic-process	1.3161e-28	0.272393	1	1	9.82469e-25	2	go-positive-regulation-of-phosphorus-metabolic-process
go-cell-leading-edge	1.37824e-28	0.253781	1	1	1.02886e-24	2	go-cell-leading-edge
go-regulation-of-inflammatory-response-to-antigenic-stimulus	1.64978e-28	0.422616	0.983	0.542	1.23156e-24	2	go-regulation-of-inflammatory-response-to-antigenic-stimulus
go-cell-chemotaxis	1.72261e-28	0.323516	1	1	1.28592e-24	2	go-cell-chemotaxis
go-regeneration	2.02357e-28	0.527606	1	0.991	1.51059e-24	2	go-regeneration
go-cellular-detoxification	2.25297e-28	0.558376	1	0.923	1.68184e-24	2	go-cellular-detoxification
go-negative-regulation-of-cysteine-type-endopeptidase-activity	2.35909e-28	0.523091	1	0.936	1.76106e-24	2	go-negative-regulation-of-cysteine-type-endopeptidase-activity
go-regulation-of-cellular-amino-acid-metabolic-process	2.47129e-28	0.309006	1	0.979	1.84482e-24	2	go-regulation-of-cellular-amino-acid-metabolic-process
go-positive-regulation-of-exocytosis	2.65232e-28	0.69548	1	0.775	1.97996e-24	2	go-positive-regulation-of-exocytosis
go-gliogenesis	3.2612e-28	0.675085	1	0.954	2.43449e-24	2	go-gliogenesis
go-myeloid-cell-development	3.3254e-28	0.70948	1	0.725	2.48241e-24	2	go-myeloid-cell-development
go-positive-regulation-of-cell-projection-organization	5.05289e-28	0.763474	1	0.928	3.77198e-24	2	go-positive-regulation-of-cell-projection-organization
go-autophagosome-maturation	5.4254e-28	0.427649	0.977	0.527	4.05006e-24	2	go-autophagosome-maturation
go-regulation-of-t-cell-migration	5.75856e-28	0.322456	0.989	0.477	4.29877e-24	2	go-regulation-of-t-cell-migration
go-positive-regulation-of-alpha-beta-t-cell-differentiation	7.61287e-28	0.549178	0.971	0.548	5.68301e-24	2	go-positive-regulation-of-alpha-beta-t-cell-differentiation
go-response-to-arsenic-containing-substance	1.72697e-27	0.362613	0.891	0.448	1.28918e-23	2	go-response-to-arsenic-containing-substance
go-anatomical-structure-formation-involved-in-morphogenesis	1.94025e-27	0.845468	1	0.859	1.4484e-23	2	go-anatomical-structure-formation-involved-in-morphogenesis
go-podosome	1.97758e-27	0.298771	0.845	0.411	1.47627e-23	2	go-podosome
go-drug-metabolic-process	2.10901e-27	0.631303	1	0.969	1.57437e-23	2	go-drug-metabolic-process
go-platelet-alpha-granule	2.30682e-27	0.653167	1	0.852	1.72204e-23	2	go-platelet-alpha-granule
go-hematopoietic-progenitor-cell-differentiation	2.64745e-27	0.335501	1	0.992	1.97632e-23	2	go-hematopoietic-progenitor-cell-differentiation
go-monosaccharide-biosynthetic-process	3.48955e-27	0.562996	1	0.922	2.60495e-23	2	go-monosaccharide-biosynthetic-process
go-positive-regulation-of-tor-signaling	3.89072e-27	0.269587	0.845	0.384	2.90442e-23	2	go-positive-regulation-of-tor-signaling
go-cytokine-metabolic-process	6.10529e-27	0.721747	0.997	0.934	4.5576e-23	2	go-cytokine-metabolic-process
go-regulation-of-mapk-cascade	7.3313e-27	0.320133	1	0.999	5.47282e-23	2	go-regulation-of-mapk-cascade
go-regulation-of-transmembrane-transport	7.77801e-27	0.57872	1	0.974	5.80628e-23	2	go-regulation-of-transmembrane-transport
go-extrinsic-component-of-cytoplasmic-side-of-plasma-membrane	9.08624e-27	0.751533	1	0.839	6.78288e-23	2	go-extrinsic-component-of-cytoplasmic-side-of-plasma-membrane
go-vacuolar-transport	1.19872e-26	0.47383	1	0.965	8.94844e-23	2	go-vacuolar-transport
go-negative-regulation-of-phosphorylation1	1.48154e-26	0.309829	1	0.998	1.10597e-22	2	go-negative-regulation-of-phosphorylation
go-actin-filament	1.49345e-26	0.475156	1	0.953	1.11486e-22	2	go-actin-filament
go-regulation-of-small-molecule-metabolic-process	1.76629e-26	0.377537	1	0.993	1.31853e-22	2	go-regulation-of-small-molecule-metabolic-process
go-organelle-fusion	2.02687e-26	0.604972	1	0.928	1.51306e-22	2	go-organelle-fusion
go-negative-regulation-of-kinase-activity	2.09197e-26	0.416384	1	0.993	1.56166e-22	2	go-negative-regulation-of-kinase-activity
go-vesicle-coat	2.4811e-26	0.616749	0.986	0.667	1.85214e-22	2	go-vesicle-coat
go-regulation-of-myeloid-cell-differentiation	3.18776e-26	0.29172	1	0.999	2.37966e-22	2	go-regulation-of-myeloid-cell-differentiation
go-detoxification	3.34589e-26	0.579615	1	0.921	2.4977e-22	2	go-detoxification
go-negative-regulation-of-extrinsic-apoptotic-signaling-pathway-via-death-domain-receptors	3.71922e-26	0.34492	0.908	0.452	2.7764e-22	2	go-negative-regulation-of-extrinsic-apoptotic-signaling-pathway-via-death-domain-receptors
go-multivesicular-body-organization	4.10816e-26	0.457471	0.931	0.545	3.06674e-22	2	go-multivesicular-body-organization
go-carbohydrate-derivative-metabolic-process	4.38648e-26	0.350779	1	0.997	3.27451e-22	2	go-carbohydrate-derivative-metabolic-process
go-neuron-death	5.94156e-26	0.361329	1	0.996	4.43538e-22	2	go-neuron-death
go-adenylate-cyclase-activator-activity1	6.28762e-26	0.445843	0.658	0.256	4.69371e-22	2	go-adenylate-cyclase-activator-activity
go-regulation-of-cellular-amine-metabolic-process	6.65494e-26	0.286663	1	0.986	4.96791e-22	2	go-regulation-of-cellular-amine-metabolic-process
go-antioxidant-activity	7.49634e-26	0.515624	1	0.901	5.59602e-22	2	go-antioxidant-activity
go-signal-peptidase-complex	8.17431e-26	0.303878	0.305	0.088	6.10212e-22	2	go-signal-peptidase-complex
go-endoplasmic-reticulum-to-golgi-vesicle-mediated-transport	1.00209e-25	0.483565	1	0.973	7.48063e-22	2	go-endoplasmic-reticulum-to-golgi-vesicle-mediated-transport
go-response-to-fungus	1.17124e-25	0.389116	0.997	0.549	8.74329e-22	2	go-response-to-fungus
go-type-i-interferon-production	1.19366e-25	0.45395	1	0.969	8.91066e-22	2	go-type-i-interferon-production
go-endoplasmic-reticulum-golgi-intermediate-compartment	1.61209e-25	0.51848	1	0.948	1.20342e-21	2	go-endoplasmic-reticulum-golgi-intermediate-compartment
go-peroxiredoxin-activity1	2.25791e-25	0.40946	0.667	0.269	1.68553e-21	2	go-peroxiredoxin-activity
go-escrt-complex-disassembly	2.4673e-25	0.297829	0.328	0.102	1.84184e-21	2	go-escrt-complex-disassembly
go-negative-regulation-of-histone-modification	2.50749e-25	0.277687	0.813	0.377	1.87184e-21	2	go-negative-regulation-of-histone-modification
go-negative-regulation-of-neuron-death	2.57528e-25	0.65045	1	0.956	1.92245e-21	2	go-negative-regulation-of-neuron-death
go-leukocyte-chemotaxis	2.98447e-25	0.326641	1	0.997	2.22791e-21	2	go-leukocyte-chemotaxis
go-plasma-lipoprotein-particle-clearance	3.18142e-25	0.694937	0.997	0.656	2.37493e-21	2	go-plasma-lipoprotein-particle-clearance
go-atp-hydrolysis-coupled-cation-transmembrane-transport	4.30528e-25	0.633155	0.994	0.653	3.21389e-21	2	go-atp-hydrolysis-coupled-cation-transmembrane-transport
go-negative-regulation-of-leukocyte-cell-cell-adhesion	6.14838e-25	0.709491	1	0.929	4.58977e-21	2	go-negative-regulation-of-leukocyte-cell-cell-adhesion
go-regulation-of-tumor-necrosis-factor-mediated-signaling-pathway	1.334e-24	0.571086	0.997	0.656	9.9583e-21	2	go-regulation-of-tumor-necrosis-factor-mediated-signaling-pathway
go-carbohydrate-catabolic-process	1.50082e-24	0.532834	1	0.972	1.12036e-20	2	go-carbohydrate-catabolic-process
go-non-membrane-spanning-protein-tyrosine-kinase-activity	1.60676e-24	0.379552	0.931	0.475	1.19945e-20	2	go-non-membrane-spanning-protein-tyrosine-kinase-activity
go-cellular-lipid-metabolic-process	1.84564e-24	0.826149	0.991	0.71	1.37777e-20	2	go-cellular-lipid-metabolic-process
go-proteasome-core-complex-beta-subunit-complex	2.6949e-24	0.459267	0.968	0.582	2.01174e-20	2	go-proteasome-core-complex-beta-subunit-complex
go-gtpase-binding	3.70162e-24	0.405268	1	0.996	2.76326e-20	2	go-gtpase-binding
go-protein-disulfide-oxidoreductase-activity	3.72701e-24	0.387556	0.917	0.51	2.78222e-20	2	go-protein-disulfide-oxidoreductase-activity
go-snare-complex	4.92188e-24	0.478715	0.94	0.506	3.67418e-20	2	go-snare-complex
go-regulation-of-macroautophagy	6.12194e-24	0.455857	1	0.982	4.57003e-20	2	go-regulation-of-macroautophagy
go-cortical-cytoskeleton-organization	6.22898e-24	0.438784	0.902	0.475	4.64994e-20	2	go-cortical-cytoskeleton-organization
go-cellular-response-to-toxic-substance	7.01356e-24	0.352858	1	0.997	5.23562e-20	2	go-cellular-response-to-toxic-substance
go-response-to-interferon-beta	8.64418e-24	0.44739	0.991	0.738	6.45288e-20	2	go-response-to-interferon-beta
go-cellular-monovalent-inorganic-cation-homeostasis	9.11385e-24	0.83472	0.991	0.79	6.80349e-20	2	go-cellular-monovalent-inorganic-cation-homeostasis
go-late-endosome-to-vacuole-transport-via-multivesicular-body-sorting-pathway	1.2914e-23	0.324778	0.359	0.121	9.64033e-20	2	go-late-endosome-to-vacuole-transport-via-multivesicular-body-sorting-pathway
go-regulation-of-response-to-cytokine-stimulus	1.3869e-23	0.47204	1	0.979	1.03532e-19	2	go-regulation-of-response-to-cytokine-stimulus
go-negative-regulation-of-cell-cell-adhesion	1.61456e-23	0.669708	1	0.959	1.20527e-19	2	go-negative-regulation-of-cell-cell-adhesion
go-copii-coated-vesicle-budding	2.23185e-23	0.642533	0.994	0.797	1.66608e-19	2	go-copii-coated-vesicle-budding
go-bone-resorption	2.60246e-23	0.323047	0.922	0.419	1.94273e-19	2	go-bone-resorption
go-gdp-binding	2.75526e-23	0.530162	0.997	0.827	2.0568e-19	2	go-gdp-binding
go-response-to-granulocyte-macrophage-colony-stimulating-factor	2.86399e-23	0.284924	0.339	0.111	2.13797e-19	2	go-response-to-granulocyte-macrophage-colony-stimulating-factor
go-cofactor-binding	2.99102e-23	0.545571	1	0.978	2.2328e-19	2	go-cofactor-binding
go-ion-transmembrane-transporter-activity	3.14161e-23	0.252392	0.986	0.864	2.34521e-19	2	go-ion-transmembrane-transporter-activity
go-positive-regulation-of-calcium-ion-transport	3.35689e-23	0.72518	1	0.795	2.50592e-19	2	go-positive-regulation-of-calcium-ion-transport
go-glial-cell-proliferation	3.51763e-23	0.361414	0.948	0.46	2.62591e-19	2	go-glial-cell-proliferation
go-response-to-interferon-alpha	3.64639e-23	0.383495	0.914	0.51	2.72203e-19	2	go-response-to-interferon-alpha
go-glutathione-peroxidase-activity	4.31504e-23	0.359989	0.934	0.51	3.22118e-19	2	go-glutathione-peroxidase-activity
go-proteasome-core-complex	4.69607e-23	0.37059	0.994	0.814	3.50562e-19	2	go-proteasome-core-complex
go-multivesicular-body-sorting-pathway	5.31587e-23	0.392104	0.917	0.525	3.9683e-19	2	go-multivesicular-body-sorting-pathway
go-maternal-process-involved-in-female-pregnancy	7.29315e-23	0.494545	0.971	0.51	5.44434e-19	2	go-maternal-process-involved-in-female-pregnancy
go-cellular-amino-acid-metabolic-process	7.35265e-23	0.403536	1	0.989	5.48875e-19	2	go-cellular-amino-acid-metabolic-process
go-entry-into-other-organism-involved-in-symbiotic-interaction	8.40059e-23	0.379998	1	0.991	6.27104e-19	2	go-entry-into-other-organism-involved-in-symbiotic-interaction
go-cellular-carbohydrate-catabolic-process	9.20454e-23	0.345126	0.943	0.456	6.87119e-19	2	go-cellular-carbohydrate-catabolic-process
go-active-ion-transmembrane-transporter-activity	1.52143e-22	0.62564	0.994	0.791	1.13575e-18	2	go-active-ion-transmembrane-transporter-activity
go-oxidoreductase-activity-acting-on-the-ch-ch-group-of-donors	1.63267e-22	0.350342	0.911	0.424	1.21879e-18	2	go-oxidoreductase-activity-acting-on-the-ch-ch-group-of-donors
go-regulation-of-animal-organ-morphogenesis1	1.63337e-22	0.385896	1	0.991	1.21931e-18	2	go-regulation-of-animal-organ-morphogenesis
go-ubiquinone-binding	1.76458e-22	0.25617	0.25	0.072	1.31726e-18	2	go-ubiquinone-binding
go-positive-regulation-of-cyclic-nucleotide-phosphodiesterase-activity1	2.55648e-22	0.31478	0.382	0.132	1.90842e-18	2	go-positive-regulation-of-cyclic-nucleotide-phosphodiesterase-activity
go-negative-regulation-of-neuron-apoptotic-process	2.84659e-22	0.672462	1	0.938	2.12498e-18	2	go-negative-regulation-of-neuron-apoptotic-process
go-negative-regulation-of-erbb-signaling-pathway	3.25888e-22	0.250624	0.828	0.372	2.43276e-18	2	go-negative-regulation-of-erbb-signaling-pathway
go-proteasomal-ubiquitin-independent-protein-catabolic-process	3.66634e-22	0.387971	0.994	0.808	2.73692e-18	2	go-proteasomal-ubiquitin-independent-protein-catabolic-process
go-mitotic-cytokinetic-process	4.39477e-22	0.404399	0.948	0.551	3.2807e-18	2	go-mitotic-cytokinetic-process
go-cellular-response-to-insulin-stimulus	5.76799e-22	0.470553	1	0.979	4.3058e-18	2	go-cellular-response-to-insulin-stimulus
go-clathrin-coated-vesicle	6.0147e-22	0.331901	1	0.994	4.48997e-18	2	go-clathrin-coated-vesicle
go-transition-metal-ion-binding	7.16841e-22	0.470421	1	0.992	5.35121e-18	2	go-transition-metal-ion-binding
go-respiratory-burst	7.29877e-22	0.293603	1	0.955	5.44853e-18	2	go-respiratory-burst
go-thioredoxin-peroxidase-activity	7.31348e-22	0.317744	0.256	0.076	5.45951e-18	2	go-thioredoxin-peroxidase-activity
go-regulation-of-ion-transmembrane-transport	7.34008e-22	0.628346	1	0.946	5.47937e-18	2	go-regulation-of-ion-transmembrane-transport
go-ruffle-assembly	8.13533e-22	0.503491	1	0.758	6.07302e-18	2	go-ruffle-assembly
go-non-canonical-wnt-signaling-pathway	1.03999e-21	0.272768	1	0.994	7.76355e-18	2	go-non-canonical-wnt-signaling-pathway
go-modulation-of-signal-transduction-in-other-organism1	1.05232e-21	0.346152	0.494	0.188	7.85557e-18	2	go-modulation-of-signal-transduction-in-other-organism
go-regulation-of-ph	1.15974e-21	0.792483	0.994	0.781	8.65745e-18	2	go-regulation-of-ph
go-beta-tubulin-binding	1.49713e-21	0.333334	0.92	0.488	1.11761e-17	2	go-beta-tubulin-binding
go-positive-regulation-of-protein-import	1.86595e-21	0.274079	0.799	0.39	1.39293e-17	2	go-positive-regulation-of-protein-import
go-vesicle-targeting-to-from-or-within-golgi	2.33016e-21	0.606063	0.991	0.8	1.73946e-17	2	go-vesicle-targeting-to-from-or-within-golgi
go-positive-regulation-of-wnt-signaling-pathway	2.36304e-21	0.414259	1	0.976	1.76401e-17	2	go-positive-regulation-of-wnt-signaling-pathway
go-membrane-raft-organization1	2.40406e-21	0.32102	0.908	0.497	1.79463e-17	2	go-membrane-raft-organization
go-threonine-type-peptidase-activity	2.51186e-21	0.374388	0.994	0.803	1.87511e-17	2	go-threonine-type-peptidase-activity
go-positive-regulation-of-i-kappab-kinase-nf-kappab-signaling	2.65988e-21	0.289334	1	0.997	1.9856e-17	2	go-positive-regulation-of-i-kappab-kinase-nf-kappab-signaling
go-purine-containing-compound-catabolic-process	3.64233e-21	0.294156	0.879	0.421	2.719e-17	2	go-purine-containing-compound-catabolic-process
go-regulation-of-reactive-oxygen-species-biosynthetic-process	4.81707e-21	0.38573	1	0.974	3.59595e-17	2	go-regulation-of-reactive-oxygen-species-biosynthetic-process
go-muscle-tissue-development	5.11608e-21	0.253369	0.98	0.861	3.81915e-17	2	go-muscle-tissue-development
go-ruffle-organization	5.13872e-21	0.498378	1	0.832	3.83606e-17	2	go-ruffle-organization
go-regulation-of-autophagy	5.17311e-21	0.262563	1	0.999	3.86172e-17	2	go-regulation-of-autophagy
go-regulation-of-cell-communication-by-electrical-coupling-involved-in-cardiac-conduction1	7.91742e-21	0.2984	0.601	0.239	5.91035e-17	2	go-regulation-of-cell-communication-by-electrical-coupling-involved-in-cardiac-conduction
go-cellular-response-to-extracellular-stimulus	1.00476e-20	0.354403	1	0.995	7.50054e-17	2	go-cellular-response-to-extracellular-stimulus
go-positive-regulation-of-intracellular-transport	1.19538e-20	0.282834	1	0.996	8.92349e-17	2	go-positive-regulation-of-intracellular-transport
go-gtpase-activity	2.38844e-20	0.256531	1	0.999	1.78297e-16	2	go-gtpase-activity
go-neuron-development	2.52156e-20	0.568518	1	0.982	1.88235e-16	2	go-neuron-development
go-regulation-of-oxidative-phosphorylation	3.98669e-20	0.335246	0.931	0.536	2.97607e-16	2	go-regulation-of-oxidative-phosphorylation
go-ameboidal-type-cell-migration	4.06103e-20	0.49917	1	0.989	3.03156e-16	2	go-ameboidal-type-cell-migration
go-organelle-membrane-fusion	4.86947e-20	0.57962	1	0.899	3.63506e-16	2	go-organelle-membrane-fusion
go-endosome-organization	6.32677e-20	0.584104	0.997	0.836	4.72294e-16	2	go-endosome-organization
go-cofactor-metabolic-process	6.69827e-20	0.37574	1	0.989	5.00026e-16	2	go-cofactor-metabolic-process
go-positive-regulation-of-mitochondrial-outer-membrane-permeabilization-involved-in-apoptotic-signaling-pathway	7.62046e-20	0.374848	0.925	0.564	5.68868e-16	2	go-positive-regulation-of-mitochondrial-outer-membrane-permeabilization-involved-in-apoptotic-signaling-pathway
go-reactive-oxygen-species-biosynthetic-process	8.2349e-20	0.377544	1	0.981	6.14736e-16	2	go-reactive-oxygen-species-biosynthetic-process
go-carbohydrate-binding	8.39415e-20	0.768243	0.997	0.692	6.26623e-16	2	go-carbohydrate-binding
go-vesicle-targeting	9.00869e-20	0.651357	0.991	0.845	6.72498e-16	2	go-vesicle-targeting
go-carbohydrate-biosynthetic-process	1.05938e-19	0.652742	1	0.919	7.90826e-16	2	go-carbohydrate-biosynthetic-process
go-s100-protein-binding	1.50108e-19	0.34517	0.989	0.509	1.12056e-15	2	go-s100-protein-binding
go-cysteine-type-endopeptidase-regulator-activity-involved-in-apoptotic-process	1.67492e-19	0.360114	0.92	0.52	1.25033e-15	2	go-cysteine-type-endopeptidase-regulator-activity-involved-in-apoptotic-process
go-tricarboxylic-acid-cycle	1.88736e-19	0.346023	0.902	0.52	1.40891e-15	2	go-tricarboxylic-acid-cycle
go-regulation-of-release-of-sequestered-calcium-ion-into-cytosol	1.9057e-19	0.514315	1	0.91	1.42261e-15	2	go-regulation-of-release-of-sequestered-calcium-ion-into-cytosol
go-viral-translational-termination-reinitiation	2.46825e-19	0.306385	0.451	0.176	1.84255e-15	2	go-viral-translational-termination-reinitiation
go-sh3-domain-binding	2.91469e-19	0.516274	1	0.953	2.17581e-15	2	go-sh3-domain-binding
go-central-nervous-system-development	3.26953e-19	0.487987	1	0.981	2.4407e-15	2	go-central-nervous-system-development
go-positive-regulation-of-protein-localization-to-membrane	4.32504e-19	0.491355	1	0.921	3.22864e-15	2	go-positive-regulation-of-protein-localization-to-membrane
go-regulation-of-protein-localization-to-cell-surface	4.77411e-19	0.352157	0.966	0.562	3.56388e-15	2	go-regulation-of-protein-localization-to-cell-surface
go-endomembrane-system-organization	4.79078e-19	0.384715	1	0.986	3.57632e-15	2	go-endomembrane-system-organization
go-inflammatory-response-to-antigenic-stimulus	4.87548e-19	0.424215	1	0.849	3.63955e-15	2	go-inflammatory-response-to-antigenic-stimulus
go-cellular-pigmentation	5.6221e-19	0.32578	0.914	0.489	4.1969e-15	2	go-cellular-pigmentation
go-peptidyl-cysteine-modification	5.75903e-19	0.399059	0.98	0.561	4.29911e-15	2	go-peptidyl-cysteine-modification
go-regulation-of-protein-localization-to-membrane	5.80859e-19	0.368638	1	0.986	4.33612e-15	2	go-regulation-of-protein-localization-to-membrane
go-interaction-with-host	6.82416e-19	0.259525	1	0.998	5.09424e-15	2	go-interaction-with-host
go-cell-redox-homeostasis	8.26376e-19	0.311138	1	0.975	6.1689e-15	2	go-cell-redox-homeostasis
go-cellular-response-to-oxidative-stress	8.72127e-19	0.278228	1	1	6.51043e-15	2	go-cellular-response-to-oxidative-stress
go-positive-regulation-of-oxidative-stress-induced-intrinsic-apoptotic-signaling-pathway1	1.01057e-18	0.267986	0.425	0.165	7.5439e-15	2	go-positive-regulation-of-oxidative-stress-induced-intrinsic-apoptotic-signaling-pathway
go-lysosomal-transport	1.20089e-18	0.558285	1	0.898	8.96466e-15	2	go-lysosomal-transport
go-muscle-system-process	1.45321e-18	0.623392	1	0.969	1.08482e-14	2	go-muscle-system-process
go-t-cell-migration	1.58442e-18	0.479689	1	0.699	1.18277e-14	2	go-t-cell-migration
go-positive-regulation-of-canonical-wnt-signaling-pathway	1.66603e-18	0.375635	1	0.975	1.24369e-14	2	go-positive-regulation-of-canonical-wnt-signaling-pathway
go-protein-phosphorylated-amino-acid-binding	1.9997e-18	0.436337	0.977	0.619	1.49278e-14	2	go-protein-phosphorylated-amino-acid-binding
go-endothelial-cell-development	2.13295e-18	0.322767	0.931	0.455	1.59225e-14	2	go-endothelial-cell-development
go-nucleobase-containing-small-molecule-biosynthetic-process	2.57413e-18	0.559478	1	0.911	1.92159e-14	2	go-nucleobase-containing-small-molecule-biosynthetic-process
go-negative-regulation-of-innate-immune-response	2.77111e-18	0.498517	0.997	0.875	2.06863e-14	2	go-negative-regulation-of-innate-immune-response
go-positive-regulation-of-endocytosis	2.89178e-18	0.701827	0.994	0.869	2.15871e-14	2	go-positive-regulation-of-endocytosis
go-regulation-of-dephosphorylation	4.26688e-18	0.490055	1	0.97	3.18523e-14	2	go-regulation-of-dephosphorylation
go-cellular-response-to-drug	4.61744e-18	0.356183	1	0.997	3.44692e-14	2	go-cellular-response-to-drug
go-regulation-of-toll-like-receptor-signaling-pathway	4.62586e-18	0.67588	0.994	0.727	3.45321e-14	2	go-regulation-of-toll-like-receptor-signaling-pathway
go-phagocytic-cup	7.33065e-18	0.39365	0.983	0.648	5.47233e-14	2	go-phagocytic-cup
go-golgi-vesicle-budding	9.40442e-18	0.582056	0.994	0.841	7.0204e-14	2	go-golgi-vesicle-budding
go-negative-regulation-of-neuron-projection-development	1.19267e-17	0.26001	0.991	0.888	8.90326e-14	2	go-negative-regulation-of-neuron-projection-development
go-ubiquitin-like-protein-conjugating-enzyme-activity	1.34877e-17	0.416555	0.963	0.67	1.00686e-13	2	go-ubiquitin-like-protein-conjugating-enzyme-activity
go-positive-regulation-of-ion-transmembrane-transport	1.51087e-17	0.626203	1	0.943	1.12786e-13	2	go-positive-regulation-of-ion-transmembrane-transport
go-regulation-of-oxidative-stress-induced-intrinsic-apoptotic-signaling-pathway1	1.56661e-17	0.330086	0.943	0.57	1.16947e-13	2	go-regulation-of-oxidative-stress-induced-intrinsic-apoptotic-signaling-pathway
go-regulation-of-protein-export-from-nucleus	1.60604e-17	0.283368	0.848	0.446	1.19891e-13	2	go-regulation-of-protein-export-from-nucleus
go-endopeptidase-activator-activity	1.73478e-17	0.256885	0.368	0.142	1.29501e-13	2	go-endopeptidase-activator-activity
go-positive-regulation-of-neuron-death	2.12393e-17	0.410827	1	0.957	1.58551e-13	2	go-positive-regulation-of-neuron-death
go-neuron-differentiation	2.24151e-17	0.621512	1	0.971	1.67328e-13	2	go-neuron-differentiation
go-regulation-of-peptidyl-tyrosine-phosphorylation	2.27215e-17	0.681641	1	0.942	1.69616e-13	2	go-regulation-of-peptidyl-tyrosine-phosphorylation
go-regulation-of-protein-localization-to-cell-periphery	2.94828e-17	0.449005	1	0.955	2.20089e-13	2	go-regulation-of-protein-localization-to-cell-periphery
go-regulation-of-response-to-wounding	3.8549e-17	0.282126	0.96	0.441	2.87768e-13	2	go-regulation-of-response-to-wounding
go-positive-regulation-of-erk1-and-erk2-cascade	3.97687e-17	0.630771	1	0.946	2.96873e-13	2	go-positive-regulation-of-erk1-and-erk2-cascade
go-regulation-of-erythrocyte-differentiation	4.70603e-17	0.398756	1	0.864	3.51305e-13	2	go-regulation-of-erythrocyte-differentiation
go-disulfide-oxidoreductase-activity	9.40099e-17	0.399905	0.997	0.833	7.01784e-13	2	go-disulfide-oxidoreductase-activity
go-nucleobase-containing-small-molecule-metabolic-process	1.06754e-16	0.342603	1	0.99	7.96917e-13	2	go-nucleobase-containing-small-molecule-metabolic-process
go-membrane-fusion	1.59697e-16	0.409614	1	0.976	1.19214e-12	2	go-membrane-fusion
go-mammary-gland-epithelium-development	1.99052e-16	0.44533	0.974	0.524	1.48593e-12	2	go-mammary-gland-epithelium-development
go-glial-cell-development	2.15047e-16	0.669484	0.997	0.701	1.60532e-12	2	go-glial-cell-development
go-cytokine-production-involved-in-immune-response	2.4291e-16	0.425061	1	0.986	1.81333e-12	2	go-cytokine-production-involved-in-immune-response
go-organelle-envelope-lumen	2.45411e-16	0.267905	1	0.978	1.83199e-12	2	go-organelle-envelope-lumen
go-regulation-of-cd4-positive-alpha-beta-t-cell-differentiation	2.9002e-16	0.3286	0.922	0.489	2.165e-12	2	go-regulation-of-cd4-positive-alpha-beta-t-cell-differentiation
go-cofactor-catabolic-process	4.08058e-16	0.369574	0.986	0.503	3.04615e-12	2	go-cofactor-catabolic-process
go-regulation-of-neurotransmitter-levels	4.3066e-16	0.711616	1	0.903	3.21488e-12	2	go-regulation-of-neurotransmitter-levels
go-positive-regulation-of-interferon-gamma-production	4.77609e-16	0.535179	0.994	0.778	3.56535e-12	2	go-positive-regulation-of-interferon-gamma-production
go-tube-morphogenesis	7.36009e-16	0.758025	1	0.886	5.4943e-12	2	go-tube-morphogenesis
go-regulation-of-mitochondrial-outer-membrane-permeabilization-involved-in-apoptotic-signaling-pathway	9.81986e-16	0.405311	0.983	0.69	7.33052e-12	2	go-regulation-of-mitochondrial-outer-membrane-permeabilization-involved-in-apoptotic-signaling-pathway
go-platelet-activation	1.02181e-15	0.366354	1	0.984	7.6278e-12	2	go-platelet-activation
go-cytokinetic-process	1.11712e-15	0.377911	0.989	0.659	8.33931e-12	2	go-cytokinetic-process
go-proton-transporting-two-sector-atpase-complex	1.29902e-15	0.461561	0.986	0.706	9.6972e-12	2	go-proton-transporting-two-sector-atpase-complex
go-small-gtpase-binding	1.42644e-15	0.576156	1	0.957	1.06484e-11	2	go-small-gtpase-binding
go-regulation-of-substrate-adhesion-dependent-cell-spreading	1.47545e-15	0.410875	0.997	0.807	1.10142e-11	2	go-regulation-of-substrate-adhesion-dependent-cell-spreading
go-clathrin-coated-vesicle-membrane	1.58703e-15	0.257986	0.997	0.991	1.18471e-11	2	go-clathrin-coated-vesicle-membrane
go-t-cell-activation-involved-in-immune-response	1.62001e-15	0.640891	0.997	0.856	1.20934e-11	2	go-t-cell-activation-involved-in-immune-response
go-scf-dependent-proteasomal-ubiquitin-dependent-protein-catabolic-process	1.7927e-15	0.258599	1	0.977	1.33825e-11	2	go-scf-dependent-proteasomal-ubiquitin-dependent-protein-catabolic-process
go-negative-regulation-of-mapk-cascade	1.80075e-15	0.564475	1	0.957	1.34426e-11	2	go-negative-regulation-of-mapk-cascade
go-cell-cell-adhesion-mediator-activity	1.94187e-15	0.339167	0.989	0.551	1.44961e-11	2	go-cell-cell-adhesion-mediator-activity
go-monovalent-inorganic-cation-homeostasis	2.14789e-15	0.759351	0.994	0.724	1.6034e-11	2	go-monovalent-inorganic-cation-homeostasis
go-regulation-of-protein-localization-to-plasma-membrane	2.38564e-15	0.41188	1	0.947	1.78088e-11	2	go-regulation-of-protein-localization-to-plasma-membrane
go-response-to-amino-acid-starvation	2.42728e-15	0.256266	0.891	0.46	1.81196e-11	2	go-response-to-amino-acid-starvation
go-negative-regulation-of-cell-cycle-g2-m-phase-transition	2.81059e-15	0.254725	1	0.983	2.0981e-11	2	go-negative-regulation-of-cell-cycle-g2-m-phase-transition
go-autophagy-of-mitochondrion	3.00139e-15	0.398066	1	0.904	2.24054e-11	2	go-autophagy-of-mitochondrion
go-membrane-invagination	4.34305e-15	0.688161	0.997	0.736	3.24209e-11	2	go-membrane-invagination
go-negative-regulation-of-protein-dephosphorylation	4.73796e-15	0.553304	0.986	0.701	3.53689e-11	2	go-negative-regulation-of-protein-dephosphorylation
go-positive-regulation-of-transporter-activity	5.89681e-15	0.641799	1	0.926	4.40197e-11	2	go-positive-regulation-of-transporter-activity
go-lymphocyte-activation-involved-in-immune-response	6.14586e-15	0.389101	1	0.978	4.58788e-11	2	go-lymphocyte-activation-involved-in-immune-response
go-cardiovascular-system-development	6.63732e-15	0.742501	1	0.813	4.95476e-11	2	go-cardiovascular-system-development
go-cysteine-type-endopeptidase-activity	6.75404e-15	0.677554	1	0.764	5.04189e-11	2	go-cysteine-type-endopeptidase-activity
go-autophagosome-organization	6.76992e-15	0.650161	0.994	0.808	5.05375e-11	2	go-autophagosome-organization
go-actin-polymerization-dependent-cell-motility	8.39675e-15	0.292026	0.701	0.31	6.26817e-11	2	go-actin-polymerization-dependent-cell-motility
go-regulation-of-protein-dephosphorylation1	9.24027e-15	0.394914	1	0.973	6.89786e-11	2	go-regulation-of-protein-dephosphorylation
go-response-to-acid-chemical	1.1328e-14	0.392849	1	0.994	8.45632e-11	2	go-response-to-acid-chemical
go-extracellular-matrix-disassembly	1.29402e-14	0.487736	0.991	0.596	9.65986e-11	2	go-extracellular-matrix-disassembly
go-negative-regulation-of-developmental-process	1.61179e-14	0.591504	1	0.954	1.2032e-10	2	go-negative-regulation-of-developmental-process
go-positive-regulation-of-osteoblast-differentiation	1.81084e-14	0.27393	0.968	0.471	1.35179e-10	2	go-positive-regulation-of-osteoblast-differentiation
go-ruffle-membrane	1.87826e-14	0.347735	1	0.995	1.40212e-10	2	go-ruffle-membrane
go-vesicle-localization	3.04544e-14	0.631817	1	0.922	2.27342e-10	2	go-vesicle-localization
go-tissue-migration	4.02392e-14	0.620647	0.997	0.972	3.00385e-10	2	go-tissue-migration
go-positive-regulation-of-nucleocytoplasmic-transport	4.86838e-14	0.534241	0.974	0.681	3.63425e-10	2	go-positive-regulation-of-nucleocytoplasmic-transport
go-dephosphorylation1	5.63831e-14	0.359754	1	0.986	4.209e-10	2	go-dephosphorylation
go-small-molecule-catabolic-process	7.07715e-14	0.6497	0.983	0.628	5.2831e-10	2	go-small-molecule-catabolic-process
go-beta-2-microglobulin-binding	9.44423e-14	0.354876	0.828	0.391	7.05011e-10	2	go-beta-2-microglobulin-binding
go-protein-localization-to-lysosome	1.22514e-13	0.324997	0.922	0.582	9.1457e-10	2	go-protein-localization-to-lysosome
go-regulation-of-endothelial-cell-migration	1.49371e-13	0.305403	0.977	0.834	1.11505e-09	2	go-regulation-of-endothelial-cell-migration
go-negative-regulation-of-establishment-of-protein-localization	1.54752e-13	0.345483	1	0.991	1.15522e-09	2	go-negative-regulation-of-establishment-of-protein-localization
go-lamellipodium-organization	1.71481e-13	0.389365	1	0.939	1.28011e-09	2	go-lamellipodium-organization
go-zinc-ion-binding	1.73121e-13	0.557598	1	0.967	1.29235e-09	2	go-zinc-ion-binding
go-positive-regulation-of-dephosphorylation	1.84195e-13	0.426014	0.997	0.825	1.37501e-09	2	go-positive-regulation-of-dephosphorylation
go-regulation-of-lymphocyte-migration	1.89738e-13	0.413764	1	0.642	1.41639e-09	2	go-regulation-of-lymphocyte-migration
go-insulin-receptor-signaling-pathway	1.94006e-13	0.675693	1	0.872	1.44825e-09	2	go-insulin-receptor-signaling-pathway
go-positive-regulation-of-mapk-cascade	2.48762e-13	0.293206	1	1	1.85701e-09	2	go-positive-regulation-of-mapk-cascade
go-regulation-of-wnt-signaling-pathway1	2.50117e-13	0.378786	1	0.986	1.86713e-09	2	go-regulation-of-wnt-signaling-pathway
go-glycolytic-process	2.86406e-13	0.390869	1	0.955	2.13802e-09	2	go-glycolytic-process
go-regulation-of-receptor-mediated-endocytosis	3.02678e-13	0.630069	1	0.914	2.25949e-09	2	go-regulation-of-receptor-mediated-endocytosis
go-regulation-of-generation-of-precursor-metabolites-and-energy	3.04208e-13	0.502843	1	0.938	2.27091e-09	2	go-regulation-of-generation-of-precursor-metabolites-and-energy
go-substrate-adhesion-dependent-cell-spreading	3.08206e-13	0.52188	1	0.871	2.30076e-09	2	go-substrate-adhesion-dependent-cell-spreading
go-glutathione-metabolic-process	3.60363e-13	0.330235	0.989	0.661	2.69011e-09	2	go-glutathione-metabolic-process
go-regulation-of-neutrophil-migration	3.99746e-13	0.296721	0.96	0.594	2.9841e-09	2	go-regulation-of-neutrophil-migration
go-intrinsic-component-of-mitochondrial-membrane	6.42095e-13	0.434529	1	0.903	4.79324e-09	2	go-intrinsic-component-of-mitochondrial-membrane
go-regulation-of-interleukin-4-production	7.74827e-13	0.296786	0.994	0.658	5.78408e-09	2	go-regulation-of-interleukin-4-production
go-endosome-to-lysosome-transport	8.49805e-13	0.336726	0.899	0.495	6.34379e-09	2	go-endosome-to-lysosome-transport
go-negative-regulation-of-immune-effector-process	8.97279e-13	0.282083	1	0.988	6.69819e-09	2	go-negative-regulation-of-immune-effector-process
go-receptor-internalization	1.04173e-12	0.661263	0.994	0.689	7.77649e-09	2	go-receptor-internalization
go-oxidoreductase-activity-acting-on-peroxide-as-acceptor	1.24648e-12	0.381458	0.994	0.808	9.30494e-09	2	go-oxidoreductase-activity-acting-on-peroxide-as-acceptor
go-negative-regulation-of-extrinsic-apoptotic-signaling-pathway	1.45147e-12	0.526059	0.997	0.841	1.08353e-08	2	go-negative-regulation-of-extrinsic-apoptotic-signaling-pathway
go-peptidyl-tyrosine-modification	1.48179e-12	0.639875	1	0.933	1.10616e-08	2	go-peptidyl-tyrosine-modification
go-cell-projection-assembly	1.59559e-12	0.383819	1	0.986	1.19111e-08	2	go-cell-projection-assembly
go-regulation-of-organelle-assembly	1.59568e-12	0.5103	1	0.946	1.19117e-08	2	go-regulation-of-organelle-assembly
go-mitochondrial-outer-membrane-permeabilization	2.06687e-12	0.400576	0.991	0.77	1.54292e-08	2	go-mitochondrial-outer-membrane-permeabilization
go-vesicle-mediated-transport-between-endosomal-compartments	2.80219e-12	0.324263	0.968	0.653	2.09183e-08	2	go-vesicle-mediated-transport-between-endosomal-compartments
go-rab-protein-signal-transduction	3.97066e-12	0.424965	0.937	0.532	2.9641e-08	2	go-rab-protein-signal-transduction
go-positive-regulation-of-transmembrane-transport	4.86204e-12	0.657536	1	0.924	3.62952e-08	2	go-positive-regulation-of-transmembrane-transport
go-positive-regulation-of-protein-dephosphorylation1	4.89764e-12	0.361161	0.991	0.796	3.65609e-08	2	go-positive-regulation-of-protein-dephosphorylation
go-plasma-membrane-region	5.26791e-12	0.527536	0.991	0.574	3.93249e-08	2	go-plasma-membrane-region
go-organophosphate-biosynthetic-process	5.71463e-12	0.355081	1	0.989	4.26597e-08	2	go-organophosphate-biosynthetic-process
go-channel-regulator-activity	1.32977e-11	0.26574	0.974	0.845	9.92676e-08	2	go-channel-regulator-activity
go-negative-regulation-of-leukocyte-mediated-immunity	1.33313e-11	0.389738	0.994	0.809	9.95185e-08	2	go-negative-regulation-of-leukocyte-mediated-immunity
go-establishment-or-maintenance-of-cell-polarity	1.45958e-11	0.376541	1	0.976	1.08958e-07	2	go-establishment-or-maintenance-of-cell-polarity
go-positive-regulation-of-mitochondrion-organization	1.48348e-11	0.274979	1	0.976	1.10742e-07	2	go-positive-regulation-of-mitochondrion-organization
go-negative-regulation-of-erk1-and-erk2-cascade	1.50991e-11	0.547724	0.997	0.818	1.12715e-07	2	go-negative-regulation-of-erk1-and-erk2-cascade
go-ion-channel-regulator-activity	1.62648e-11	0.264893	0.971	0.838	1.21417e-07	2	go-ion-channel-regulator-activity
go-tube-development	1.98836e-11	0.739027	1	0.85	1.48431e-07	2	go-tube-development
go-regulation-of-response-to-biotic-stimulus	2.21385e-11	0.438761	1	0.962	1.65264e-07	2	go-regulation-of-response-to-biotic-stimulus
go-regulation-of-erbb-signaling-pathway	2.95622e-11	0.615383	0.98	0.648	2.20682e-07	2	go-regulation-of-erbb-signaling-pathway
go-endopeptidase-regulator-activity	3.06053e-11	0.558005	1	0.915	2.28468e-07	2	go-endopeptidase-regulator-activity
go-positive-regulation-of-lamellipodium-organization	3.27149e-11	0.298354	0.991	0.698	2.44217e-07	2	go-positive-regulation-of-lamellipodium-organization
go-positive-regulation-of-protein-catabolic-process	3.29734e-11	0.364993	1	0.982	2.46146e-07	2	go-positive-regulation-of-protein-catabolic-process
go-response-to-amino-acid	3.44612e-11	0.367224	1	0.971	2.57253e-07	2	go-response-to-amino-acid
go-positive-regulation-of-reactive-oxygen-species-biosynthetic-process	3.4743e-11	0.337166	1	0.927	2.59357e-07	2	go-positive-regulation-of-reactive-oxygen-species-biosynthetic-process
go-regulation-of-extrinsic-apoptotic-signaling-pathway-via-death-domain-receptors	4.19673e-11	0.435445	0.991	0.719	3.13286e-07	2	go-regulation-of-extrinsic-apoptotic-signaling-pathway-via-death-domain-receptors
go-organellar-large-ribosomal-subunit	4.55118e-11	0.33828	0.994	0.809	3.39746e-07	2	go-organellar-large-ribosomal-subunit
go-regulation-of-mitochondrial-membrane-potential	4.7686e-11	0.287346	1	0.952	3.55976e-07	2	go-regulation-of-mitochondrial-membrane-potential
go-protein-dephosphorylation1	6.12391e-11	0.275362	1	0.993	4.5715e-07	2	go-protein-dephosphorylation
go-gland-development	7.46863e-11	0.424465	1	0.981	5.57533e-07	2	go-gland-development
go-protein-localization-to-cell-surface	9.1288e-11	0.414083	0.997	0.716	6.81465e-07	2	go-protein-localization-to-cell-surface
go-cell-projection-membrane	1.02611e-10	0.684111	1	0.947	7.65992e-07	2	go-cell-projection-membrane
go-neurotransmitter-biosynthetic-process	1.27681e-10	0.66002	1	0.804	9.53137e-07	2	go-neurotransmitter-biosynthetic-process
go-monosaccharide-binding	1.37942e-10	0.56011	0.989	0.664	1.02973e-06	2	go-monosaccharide-binding
go-regulation-of-nervous-system-development	1.43414e-10	0.760694	1	0.808	1.07059e-06	2	go-regulation-of-nervous-system-development
go-regulation-of-calcium-ion-transport-into-cytosol	1.64262e-10	0.404943	1	0.947	1.22622e-06	2	go-regulation-of-calcium-ion-transport-into-cytosol
go-site-of-polarized-growth	1.73442e-10	0.276998	0.945	0.817	1.29475e-06	2	go-site-of-polarized-growth
go-regulation-of-protein-binding	1.73968e-10	0.25798	1	0.999	1.29867e-06	2	go-regulation-of-protein-binding
go-regulation-of-lamellipodium-organization	1.94664e-10	0.330903	1	0.869	1.45316e-06	2	go-regulation-of-lamellipodium-organization
go-pyrimidine-containing-compound-biosynthetic-process	2.38272e-10	0.362839	0.94	0.562	1.7787e-06	2	go-pyrimidine-containing-compound-biosynthetic-process
go-organelle-disassembly	3.00648e-10	0.342088	1	0.94	2.24434e-06	2	go-organelle-disassembly
go-protein-homooligomerization	3.16158e-10	0.359374	1	0.982	2.36012e-06	2	go-protein-homooligomerization
go-epithelial-cell-proliferation	4.31621e-10	0.292813	0.948	0.754	3.22205e-06	2	go-epithelial-cell-proliferation
go-head-development1	4.60103e-10	0.374239	1	0.983	3.43467e-06	2	go-head-development
go-negative-regulation-of-cell-projection-organization	5.35942e-10	0.253043	0.989	0.938	4.0008e-06	2	go-negative-regulation-of-cell-projection-organization
go-transition-metal-ion-transport	5.37758e-10	0.420241	1	0.995	4.01437e-06	2	go-transition-metal-ion-transport
go-phosphatase-binding1	5.50213e-10	0.383495	1	0.966	4.10734e-06	2	go-phosphatase-binding
go-protein-phosphatase-binding	5.95084e-10	0.434006	1	0.941	4.4423e-06	2	go-protein-phosphatase-binding
go-divalent-inorganic-cation-homeostasis	6.11031e-10	0.391419	1	0.99	4.56135e-06	2	go-divalent-inorganic-cation-homeostasis
go-cell-junction-organization	6.40665e-10	0.672332	0.997	0.893	4.78256e-06	2	go-cell-junction-organization
go-transporter-activity	6.75485e-10	0.565396	1	0.957	5.0425e-06	2	go-transporter-activity
go-multi-multicellular-organism-process	7.42462e-10	0.496362	1	0.988	5.54248e-06	2	go-multi-multicellular-organism-process
go-positive-regulation-of-substrate-adhesion-dependent-cell-spreading	1.01838e-09	0.294884	0.997	0.775	7.60223e-06	2	go-positive-regulation-of-substrate-adhesion-dependent-cell-spreading
go-transferase-activity-transferring-alkyl-or-aryl-other-than-methyl-groups	1.05257e-09	0.353819	0.957	0.605	7.85741e-06	2	go-transferase-activity-transferring-alkyl-or-aryl-other-than-methyl-groups
go-regulation-of-plasma-lipoprotein-particle-levels	1.18744e-09	0.674623	0.997	0.767	8.86425e-06	2	go-regulation-of-plasma-lipoprotein-particle-levels
go-midbody	1.26397e-09	0.314856	1	0.977	9.43552e-06	2	go-midbody
go-regulation-of-response-to-oxidative-stress	1.34003e-09	0.489774	1	0.831	1.00033e-05	2	go-regulation-of-response-to-oxidative-stress
go-response-to-vitamin	1.59187e-09	0.253356	0.994	0.878	1.18833e-05	2	go-response-to-vitamin
go-antibiotic-metabolic-process	1.9517e-09	0.329674	1	0.976	1.45694e-05	2	go-antibiotic-metabolic-process
go-positive-regulation-of-receptor-mediated-endocytosis	2.35791e-09	0.401233	0.994	0.63	1.76018e-05	2	go-positive-regulation-of-receptor-mediated-endocytosis
go-positive-regulation-of-membrane-permeability	2.42188e-09	0.419423	0.994	0.789	1.80793e-05	2	go-positive-regulation-of-membrane-permeability
go-interleukin-4-production	2.81397e-09	0.251856	0.994	0.685	2.10063e-05	2	go-interleukin-4-production
go-protein-heterodimerization-activity	3.29146e-09	0.255679	1	0.996	2.45707e-05	2	go-protein-heterodimerization-activity
go-erbb-signaling-pathway	4.32259e-09	0.69125	0.997	0.828	3.22681e-05	2	go-erbb-signaling-pathway
go-negative-regulation-of-response-to-oxidative-stress	5.18419e-09	0.274829	0.96	0.55	3.87e-05	2	go-negative-regulation-of-response-to-oxidative-stress
go-canonical-wnt-signaling-pathway1	5.29279e-09	0.33494	1	0.978	3.95107e-05	2	go-canonical-wnt-signaling-pathway
go-phosphoprotein-binding	5.82333e-09	0.533804	0.991	0.769	4.34712e-05	2	go-phosphoprotein-binding
go-intrinsic-component-of-mitochondrial-inner-membrane	5.95213e-09	0.344759	0.983	0.773	4.44327e-05	2	go-intrinsic-component-of-mitochondrial-inner-membrane
go-developmental-process-involved-in-reproduction	6.00237e-09	0.335774	0.974	0.818	4.48077e-05	2	go-developmental-process-involved-in-reproduction
go-negative-regulation-of-intracellular-transport	6.34409e-09	0.468597	0.977	0.722	4.73586e-05	2	go-negative-regulation-of-intracellular-transport
go-negative-regulation-of-peptide-secretion	8.53592e-09	0.365885	1	0.988	6.37206e-05	2	go-negative-regulation-of-peptide-secretion
go-positive-regulation-of-smooth-muscle-cell-proliferation	8.87958e-09	0.290063	0.98	0.821	6.62861e-05	2	go-positive-regulation-of-smooth-muscle-cell-proliferation
go-mitotic-spindle-assembly	8.88164e-09	0.290019	0.966	0.595	6.63014e-05	2	go-mitotic-spindle-assembly
go-regulation-of-cytokine-production-involved-in-immune-response	1.0481e-08	0.328712	1	0.98	7.82403e-05	2	go-regulation-of-cytokine-production-involved-in-immune-response
go-endopeptidase-activity	1.09516e-08	0.569318	1	0.834	8.17538e-05	2	go-endopeptidase-activity
go-negative-regulation-of-map-kinase-activity	1.28579e-08	0.576497	0.994	0.795	9.59841e-05	2	go-negative-regulation-of-map-kinase-activity
go-mitochondrial-translational-termination	1.35732e-08	0.255421	1	0.951	0.000101324	2	go-mitochondrial-translational-termination
go-positive-regulation-of-dna-binding	1.52894e-08	0.393679	1	0.818	0.000114136	2	go-positive-regulation-of-dna-binding
go-liver-regeneration	1.58465e-08	0.303825	0.983	0.777	0.000118294	2	go-liver-regeneration
go-protein-localization-to-vacuole	1.84961e-08	0.368502	1	0.804	0.000138073	2	go-protein-localization-to-vacuole
go-positive-regulation-of-type-i-interferon-production	1.88316e-08	0.364985	0.997	0.898	0.000140578	2	go-positive-regulation-of-type-i-interferon-production
go-epithelial-cell-development	2.41109e-08	0.287836	0.983	0.783	0.000179988	2	go-epithelial-cell-development
go-positive-regulation-of-stress-fiber-assembly	2.42325e-08	0.372294	0.991	0.707	0.000180895	2	go-positive-regulation-of-stress-fiber-assembly
go-glycolytic-process-through-fructose-6-phosphate	2.79054e-08	0.269714	0.997	0.795	0.000208314	2	go-glycolytic-process-through-fructose-6-phosphate
go-positive-regulation-of-response-to-cytokine-stimulus	2.92605e-08	0.355345	0.957	0.594	0.00021843	2	go-positive-regulation-of-response-to-cytokine-stimulus
go-somatodendritic-compartment	4.22894e-08	0.329397	1	0.992	0.00031569	2	go-somatodendritic-compartment
go-tor-signaling	5.16505e-08	0.257349	0.98	0.872	0.000385571	2	go-tor-signaling
go-negative-regulation-of-nervous-system-development	5.76659e-08	0.365526	0.989	0.813	0.000430476	2	go-negative-regulation-of-nervous-system-development
go-leukocyte-apoptotic-process	5.97136e-08	0.274195	1	0.98	0.000445762	2	go-leukocyte-apoptotic-process
go-organellar-ribosome	6.48922e-08	0.258371	1	0.94	0.00048442	2	go-organellar-ribosome
go-carbohydrate-derivative-biosynthetic-process	7.25565e-08	0.32179	1	0.989	0.000541634	2	go-carbohydrate-derivative-biosynthetic-process
go-regulation-of-protein-maturation	7.63888e-08	0.349204	0.98	0.576	0.000570243	2	go-regulation-of-protein-maturation
go-regulation-of-nucleocytoplasmic-transport	9.37009e-08	0.494556	0.994	0.894	0.000699477	2	go-regulation-of-nucleocytoplasmic-transport
go-atpase-activity-coupled-to-movement-of-substances	9.63923e-08	0.301055	0.989	0.818	0.000719569	2	go-atpase-activity-coupled-to-movement-of-substances
go-intrinsic-apoptotic-signaling-pathway-in-response-to-oxidative-stress1	9.85737e-08	0.284396	0.966	0.746	0.000735853	2	go-intrinsic-apoptotic-signaling-pathway-in-response-to-oxidative-stress
go-regulation-of-lipid-biosynthetic-process	1.36734e-07	0.299201	0.96	0.813	0.00102072	2	go-regulation-of-lipid-biosynthetic-process
go-regulation-of-cd4-positive-alpha-beta-t-cell-activation	1.67189e-07	0.340691	0.966	0.572	0.00124807	2	go-regulation-of-cd4-positive-alpha-beta-t-cell-activation
go-intrinsic-apoptotic-signaling-pathway-in-response-to-endoplasmic-reticulum-stress	1.78175e-07	0.330814	0.991	0.85	0.00133008	2	go-intrinsic-apoptotic-signaling-pathway-in-response-to-endoplasmic-reticulum-stress
go-regulation-of-protein-complex-disassembly	2.23344e-07	0.257733	0.98	0.858	0.00166726	2	go-regulation-of-protein-complex-disassembly
go-protein-insertion-into-mitochondrial-membrane	2.53577e-07	0.253733	0.994	0.835	0.00189295	2	go-protein-insertion-into-mitochondrial-membrane
go-protein-homotetramerization	2.63917e-07	0.465576	0.997	0.887	0.00197014	2	go-protein-homotetramerization
go-regulation-of-neural-precursor-cell-proliferation	3.09069e-07	0.543287	0.98	0.665	0.0023072	2	go-regulation-of-neural-precursor-cell-proliferation
go-mitotic-cytokinesis	3.11649e-07	0.331125	1	0.9	0.00232646	2	go-mitotic-cytokinesis
go-supramolecular-complex1	3.27869e-07	0.360942	1	0.963	0.00244754	2	go-supramolecular-complex
go-interferon-gamma-production	3.4841e-07	0.349728	1	0.955	0.00260088	2	go-interferon-gamma-production
go-hydrolase-activity-acting-on-carbon-nitrogen-but-not-peptide-bonds	3.68786e-07	0.312185	0.891	0.485	0.00275299	2	go-hydrolase-activity-acting-on-carbon-nitrogen-but-not-peptide-bonds
go-cleavage-furrow	3.90022e-07	0.347253	0.945	0.642	0.00291152	2	go-cleavage-furrow
go-inositol-lipid-mediated-signaling	4.14716e-07	0.27718	0.977	0.781	0.00309585	2	go-inositol-lipid-mediated-signaling
go-regulation-of-lamellipodium-assembly	4.15313e-07	0.271623	0.997	0.802	0.00310031	2	go-regulation-of-lamellipodium-assembly
go-cell-junction-assembly	4.5193e-07	0.61028	0.997	0.905	0.00337365	2	go-cell-junction-assembly
go-negative-regulation-of-cellular-protein-localization	4.8046e-07	0.497952	0.989	0.876	0.00358664	2	go-negative-regulation-of-cellular-protein-localization
go-positive-regulation-of-actin-filament-bundle-assembly	6.05559e-07	0.331845	1	0.886	0.0045205	2	go-positive-regulation-of-actin-filament-bundle-assembly
go-developmental-growth	6.66726e-07	0.293265	0.986	0.775	0.00497711	2	go-developmental-growth
go-negative-regulation-of-dna-binding-transcription-factor-activity	8.70458e-07	0.458987	1	0.965	0.00649797	2	go-negative-regulation-of-dna-binding-transcription-factor-activity
go-regulation-of-carbohydrate-metabolic-process	1.03456e-06	0.251751	0.911	0.709	0.00772296	2	go-regulation-of-carbohydrate-metabolic-process
go-positive-regulation-of-protein-localization-to-cell-periphery	1.12194e-06	0.329646	0.966	0.588	0.00837532	2	go-positive-regulation-of-protein-localization-to-cell-periphery
go-contractile-actin-filament-bundle-assembly	1.28591e-06	0.452842	1	0.93	0.00959929	2	go-contractile-actin-filament-bundle-assembly
go-nucleoside-metabolic-process	1.47707e-06	0.294364	0.994	0.776	0.0110263	2	go-nucleoside-metabolic-process
go-signal-release	1.5728e-06	0.637749	1	0.905	0.0117409	2	go-signal-release
go-regulation-of-peptide-hormone-secretion	1.75714e-06	0.365851	0.997	0.867	0.0131171	2	go-regulation-of-peptide-hormone-secretion
go-lipid-droplet	1.97832e-06	0.440431	0.994	0.841	0.0147682	2	go-lipid-droplet
go-actin-filament-depolymerization	3.18562e-06	0.332451	0.989	0.709	0.0237807	2	go-actin-filament-depolymerization
go-cysteine-type-peptidase-activity	3.69354e-06	0.601401	0.997	0.86	0.0275723	2	go-cysteine-type-peptidase-activity
go-cell-substrate-adhesion	4.26188e-06	0.476972	1	0.933	0.0318149	2	go-cell-substrate-adhesion
go-regulation-of-alpha-beta-t-cell-differentiation	4.41841e-06	0.435967	0.989	0.734	0.0329834	2	go-regulation-of-alpha-beta-t-cell-differentiation
go-positive-regulation-of-cell-morphogenesis-involved-in-differentiation	4.51979e-06	0.529643	1	0.898	0.0337402	2	go-positive-regulation-of-cell-morphogenesis-involved-in-differentiation
go-cell-body	4.89217e-06	0.265067	1	0.995	0.03652	2	go-cell-body
go-negative-regulation-of-wnt-signaling-pathway	5.49025e-06	0.2602	1	0.985	0.0409847	2	go-negative-regulation-of-wnt-signaling-pathway
go-regulation-of-membrane-permeability	5.50632e-06	0.405585	0.994	0.843	0.0411047	2	go-regulation-of-membrane-permeability
go-peptidyl-serine-modification	5.5852e-06	0.284816	0.957	0.88	0.0416935	2	go-peptidyl-serine-modification
go-cellular-response-to-amino-acid-stimulus	5.93029e-06	0.412143	0.991	0.762	0.0442696	2	go-cellular-response-to-amino-acid-stimulus
go-animal-organ-regeneration	7.09454e-06	0.267994	1	0.981	0.0529608	2	go-animal-organ-regeneration
go-syntaxin-binding	8.16975e-06	0.279341	0.899	0.508	0.0609872	2	go-syntaxin-binding
go-regulation-of-calcium-ion-transmembrane-transport	8.46285e-06	0.493164	0.997	0.919	0.0631752	2	go-regulation-of-calcium-ion-transmembrane-transport
go-presynapse	1.22969e-05	0.465281	1	0.956	0.0917964	2	go-presynapse
go-carbohydrate-derivative-transport	1.35488e-05	0.350739	1	0.878	0.101142	2	go-carbohydrate-derivative-transport
go-regulation-of-macrophage-activation	1.96284e-05	0.392693	0.986	0.735	0.146526	2	go-regulation-of-macrophage-activation
go-lamellipodium-assembly	1.98022e-05	0.321526	1	0.862	0.147823	2	go-lamellipodium-assembly
go-phosphatidylinositol-bisphosphate-binding	2.06986e-05	0.336445	0.968	0.764	0.154515	2	go-phosphatidylinositol-bisphosphate-binding
go-g-protein-coupled-receptor-binding	2.27451e-05	0.259133	0.977	0.737	0.169792	2	go-g-protein-coupled-receptor-binding
go-positive-regulation-of-protein-binding	3.14125e-05	0.282361	1	0.981	0.234494	2	go-positive-regulation-of-protein-binding
go-protein-transporter-activity	3.4004e-05	0.339261	0.997	0.912	0.25384	2	go-protein-transporter-activity
go-regulation-of-mitochondrial-membrane-permeability-involved-in-apoptotic-process	3.53856e-05	0.355063	0.991	0.781	0.264153	2	go-regulation-of-mitochondrial-membrane-permeability-involved-in-apoptotic-process
go-regulation-of-actin-filament-bundle-assembly	3.7485e-05	0.400986	1	0.931	0.279826	2	go-regulation-of-actin-filament-bundle-assembly
go-lipid-catabolic-process	3.77695e-05	0.275675	0.917	0.507	0.281949	2	go-lipid-catabolic-process
go-glycosyl-compound-metabolic-process	4.11847e-05	0.316356	1	0.825	0.307444	2	go-glycosyl-compound-metabolic-process
go-regulation-of-oxidative-stress-induced-cell-death	4.27737e-05	0.334425	1	0.792	0.319306	2	go-regulation-of-oxidative-stress-induced-cell-death
go-nad-binding	4.5274e-05	0.333771	0.968	0.748	0.33797	2	go-nad-binding
go-b-cell-proliferation	5.25999e-05	0.302655	1	0.918	0.392658	2	go-b-cell-proliferation
go-regulation-of-epithelial-cell-migration	5.80932e-05	0.499917	1	0.976	0.433666	2	go-regulation-of-epithelial-cell-migration
go-establishment-of-protein-localization-to-plasma-membrane	6.17007e-05	0.284458	0.897	0.587	0.460595	2	go-establishment-of-protein-localization-to-plasma-membrane
go-nucleoside-phosphate-metabolic-process1	6.49081e-05	0.288152	1	0.969	0.484539	2	go-nucleoside-phosphate-metabolic-process
go-acute-inflammatory-response	6.66078e-05	0.493924	1	0.744	0.497228	2	go-acute-inflammatory-response
go-sequestering-of-calcium-ion	7.27306e-05	0.28042	1	0.971	0.542934	2	go-sequestering-of-calcium-ion
go-regulation-of-phosphoprotein-phosphatase-activity1	8.3378e-05	0.266424	1	0.955	0.622417	2	go-regulation-of-phosphoprotein-phosphatase-activity
go-blood-vessel-morphogenesis	9.23204e-05	0.617662	1	0.756	0.689172	2	go-blood-vessel-morphogenesis
go-regulation-of-gliogenesis	9.685e-05	0.256434	0.96	0.742	0.722985	2	go-regulation-of-gliogenesis
go-regulation-of-muscle-system-process	9.8274e-05	0.42056	0.986	0.809	0.733615	2	go-regulation-of-muscle-system-process
go-positive-regulation-of-cytokine-biosynthetic-process	0.000108807	0.43773	0.983	0.736	0.812245	2	go-positive-regulation-of-cytokine-biosynthetic-process
go-histone-deacetylase-binding	0.000119952	0.453332	1	0.897	0.895441	2	go-histone-deacetylase-binding
go-reproductive-system-development	0.000124515	0.563992	0.994	0.911	0.929506	2	go-reproductive-system-development
go-regulation-of-lipid-localization	0.000125271	0.289495	0.966	0.727	0.935146	2	go-regulation-of-lipid-localization
go-rho-gtpase-binding	0.000148451	0.56426	0.994	0.934	1	2	go-rho-gtpase-binding
go-regulation-of-insulin-secretion	0.000151802	0.365608	1	0.893	1	2	go-regulation-of-insulin-secretion
go-ire1-mediated-unfolded-protein-response	0.000152085	0.32238	0.983	0.698	1	2	go-ire1-mediated-unfolded-protein-response
go-cytosolic-transport	0.000156656	0.420961	1	0.927	1	2	go-cytosolic-transport
go-regulation-of-cell-size	0.000160854	0.345435	0.974	0.8	1	2	go-regulation-of-cell-size
go-positive-regulation-of-leukocyte-chemotaxis	0.000168846	0.278599	1	0.963	1	2	go-positive-regulation-of-leukocyte-chemotaxis
go-regulation-of-adherens-junction-organization	0.000181326	0.372859	1	0.627	1	2	go-regulation-of-adherens-junction-organization
go-insulin-secretion-involved-in-cellular-response-to-glucose-stimulus	0.000221846	0.257142	0.937	0.562	1	2	go-insulin-secretion-involved-in-cellular-response-to-glucose-stimulus
go-mammary-gland-development	0.000234844	0.394423	0.986	0.852	1	2	go-mammary-gland-development
go-mononuclear-cell-migration	0.00024963	0.372365	1	0.943	1	2	go-mononuclear-cell-migration
go-regulation-of-hormone-secretion	0.000267915	0.414139	0.989	0.871	1	2	go-regulation-of-hormone-secretion
go-transferase-activity-transferring-phosphorus-containing-groups	0.00031411	0.480801	0.983	0.908	1	2	go-transferase-activity-transferring-phosphorus-containing-groups
go-regulation-of-phosphatase-activity	0.000319236	0.345758	1	0.955	1	2	go-regulation-of-phosphatase-activity
go-positive-regulation-of-lymphocyte-differentiation1	0.00032054	0.270445	1	0.949	1	2	go-positive-regulation-of-lymphocyte-differentiation
go-positive-regulation-of-cellular-protein-catabolic-process	0.00036819	0.392061	0.986	0.911	1	2	go-positive-regulation-of-cellular-protein-catabolic-process
go-peptide-metabolic-process	0.000492923	0.30534	1	0.936	1	2	go-peptide-metabolic-process
go-amyloid-beta-binding	0.00049935	0.260721	0.991	0.759	1	2	go-amyloid-beta-binding
go-kinase-activity	0.000506735	0.364678	0.951	0.815	1	2	go-kinase-activity
go-positive-regulation-of-peptidyl-serine-phosphorylation	0.000582335	0.259698	0.968	0.864	1	2	go-positive-regulation-of-peptidyl-serine-phosphorylation
go-positive-regulation-of-oxidoreductase-activity	0.000609018	0.347641	0.986	0.776	1	2	go-positive-regulation-of-oxidoreductase-activity
go-defense-response-to-gram-positive-bacterium	0.000690452	0.256848	0.986	0.689	1	2	go-defense-response-to-gram-positive-bacterium
go-positive-regulation-of-cell-growth	0.000871702	0.421832	1	0.949	1	2	go-positive-regulation-of-cell-growth
go-negative-regulation-of-response-to-cytokine-stimulus	0.00094434	0.255163	0.983	0.587	1	2	go-negative-regulation-of-response-to-cytokine-stimulus
go-regulation-of-neuron-projection-development	0.000962438	0.680691	1	0.82	1	2	go-regulation-of-neuron-projection-development
go-muscle-cell-proliferation	0.00115225	0.436082	0.974	0.835	1	2	go-muscle-cell-proliferation
go-negative-regulation-of-inflammatory-response	0.00136109	0.601121	0.997	0.884	1	2	go-negative-regulation-of-inflammatory-response
go-phospholipid-binding	0.00154444	0.597546	0.994	0.891	1	2	go-phospholipid-binding
go-placenta-development	0.00217798	0.364466	0.971	0.862	1	2	go-placenta-development
go-golgi-to-plasma-membrane-transport	0.00233505	0.301082	0.948	0.7	1	2	go-golgi-to-plasma-membrane-transport
go-cellular-response-to-mechanical-stimulus	0.00233561	0.451564	0.983	0.74	1	2	go-cellular-response-to-mechanical-stimulus
go-multicellular-organismal-homeostasis	0.00270481	0.407113	1	0.975	1	2	go-multicellular-organismal-homeostasis
go-embryo-implantation	0.00329612	0.306209	0.994	0.851	1	2	go-embryo-implantation
go-astrocyte-differentiation	0.00355833	0.275764	0.966	0.564	1	2	go-astrocyte-differentiation
go-primary-active-transmembrane-transporter-activity	0.00381206	0.350683	0.997	0.962	1	2	go-primary-active-transmembrane-transporter-activity
go-calcium-ion-transmembrane-transport	0.00388327	0.468131	1	0.94	1	2	go-calcium-ion-transmembrane-transport
go-regulation-of-gtpase-activity	0.00390558	0.37209	1	0.953	1	2	go-regulation-of-gtpase-activity
go-cell-death-in-response-to-oxidative-stress	0.00391448	0.314001	1	0.873	1	2	go-cell-death-in-response-to-oxidative-stress
go-response-to-xenobiotic-stimulus	0.00399591	0.551583	0.997	0.817	1	2	go-response-to-xenobiotic-stimulus
go-carbohydrate-homeostasis	0.00421422	0.41267	0.989	0.923	1	2	go-carbohydrate-homeostasis
go-negative-regulation-of-calcium-ion-transport	0.00464315	0.369017	0.983	0.691	1	2	go-negative-regulation-of-calcium-ion-transport
go-monocarboxylic-acid-metabolic-process	0.0047944	0.524637	0.997	0.9	1	2	go-monocarboxylic-acid-metabolic-process
go-rho-protein-signal-transduction	0.00485555	0.356106	0.989	0.942	1	2	go-rho-protein-signal-transduction
go-magnesium-ion-binding	0.00563191	0.523079	0.98	0.866	1	2	go-magnesium-ion-binding
go-post-golgi-vesicle-mediated-transport	0.00637376	0.341269	0.989	0.891	1	2	go-post-golgi-vesicle-mediated-transport
go-endoplasmic-reticulum-unfolded-protein-response1	0.00652051	0.284171	0.997	0.909	1	2	go-endoplasmic-reticulum-unfolded-protein-response
go-neurotransmitter-metabolic-process	0.00660334	0.600702	0.997	0.809	1	2	go-neurotransmitter-metabolic-process
go-negative-regulation-of-nf-kappab-transcription-factor-activity	0.00686061	0.361138	0.997	0.924	1	2	go-negative-regulation-of-nf-kappab-transcription-factor-activity
go-polymeric-cytoskeletal-fiber1	0.00701773	0.306389	1	0.962	1	2	go-polymeric-cytoskeletal-fiber
go-cellular-carbohydrate-metabolic-process	0.00778685	0.268187	0.934	0.652	1	2	go-cellular-carbohydrate-metabolic-process
go-regulation-of-defense-response-to-virus	0.00862597	0.311999	0.966	0.661	1	2	go-regulation-of-defense-response-to-virus
go-phosphoric-ester-hydrolase-activity	0.00927453	0.299922	0.991	0.9	1	2	go-phosphoric-ester-hydrolase-activity
go-protein-nitrosylation	1.16003e-220	1.50874	0.902	0.181	8.65959e-217	3	go-protein-nitrosylation
go-extracellular-matrix1	6.96443e-168	1.30963	1	0.383	5.19895e-164	3	go-extracellular-matrix
go-rage-receptor-binding1	5.09321e-163	1.49432	0.946	0.393	3.80208e-159	3	go-rage-receptor-binding
go-collagen-containing-extracellular-matrix1	5.87186e-162	1.70598	1	0.567	4.38334e-158	3	go-collagen-containing-extracellular-matrix
go-defense-response-to-fungus1	7.34174e-162	1.57137	0.991	0.461	5.48061e-158	3	go-defense-response-to-fungus
go-sequestering-of-metal-ion	2.65314e-158	1.24573	0.997	0.525	1.98057e-154	3	go-sequestering-of-metal-ion
go-defense-response-to-bacterium1	2.05046e-154	1.71571	1	0.871	1.53067e-150	3	go-defense-response-to-bacterium
go-inflammatory-response1	1.99373e-152	1.06458	1	0.999	1.48832e-148	3	go-inflammatory-response
go-chemokine-production1	4.36994e-149	1.62643	0.994	0.755	3.26216e-145	3	go-chemokine-production
go-response-to-bacterium1	1.65099e-147	0.960924	1	1	1.23246e-143	3	go-response-to-bacterium
go-tertiary-granule-lumen1	1.11967e-142	1.00264	1	0.986	8.35834e-139	3	go-tertiary-granule-lumen
go-myeloid-leukocyte-migration1	1.25226e-140	1.22123	1	0.994	9.34815e-137	3	go-myeloid-leukocyte-migration
go-tertiary-granule1	6.96901e-139	0.935877	1	1	5.20236e-135	3	go-tertiary-granule
go-positive-regulation-of-inflammatory-response1	3.20366e-137	1.27905	1	0.981	2.39153e-133	3	go-positive-regulation-of-inflammatory-response
go-response-to-hydroperoxide1	1.69269e-136	1.27517	0.848	0.276	1.26359e-132	3	go-response-to-hydroperoxide
go-response-to-fungus1	4.22454e-135	1.46003	0.991	0.552	3.15362e-131	3	go-response-to-fungus
go-neutrophil-migration1	2.98181e-134	1.50656	1	0.887	2.22592e-130	3	go-neutrophil-migration
go-secretory-granule1	3.66335e-134	0.814211	1	1	2.73469e-130	3	go-secretory-granule
go-myeloid-leukocyte-activation1	4.47999e-134	0.767342	1	1	3.34431e-130	3	go-myeloid-leukocyte-activation
go-positive-regulation-of-response-to-external-stimulus1	7.15862e-134	0.879396	1	0.999	5.34391e-130	3	go-positive-regulation-of-response-to-external-stimulus
go-astrocyte-development1	2.29842e-133	0.864155	0.815	0.249	1.71577e-129	3	go-astrocyte-development
go-myeloid-leukocyte-mediated-immunity1	1.15687e-132	0.76097	1	1	8.63605e-129	3	go-myeloid-leukocyte-mediated-immunity
go-cell-chemotaxis1	8.00909e-131	0.860929	1	1	5.97879e-127	3	go-cell-chemotaxis
go-cell-activation-involved-in-immune-response1	1.23061e-129	0.738274	1	1	9.18653e-126	3	go-cell-activation-involved-in-immune-response
go-positive-regulation-of-interleukin-6-production1	2.21511e-129	1.43188	0.997	0.791	1.65358e-125	3	go-positive-regulation-of-interleukin-6-production
go-regulation-of-inflammatory-response1	7.48025e-129	1.02102	1	0.997	5.58401e-125	3	go-regulation-of-inflammatory-response
go-taxis1	8.97939e-129	1.07327	1	0.994	6.70311e-125	3	go-taxis
go-vesicle-lumen1	2.53359e-128	0.646183	1	1	1.89133e-124	3	go-vesicle-lumen
go-secretory-vesicle1	1.34032e-127	0.746439	1	1	1.00055e-123	3	go-secretory-vesicle
go-secretion1	1.69346e-126	0.733872	1	1	1.26417e-122	3	go-secretion
go-leukocyte-mediated-immunity1	2.79667e-126	0.65705	1	1	2.08772e-122	3	go-leukocyte-mediated-immunity
go-exocytosis1	4.89734e-126	0.728608	1	1	3.65586e-122	3	go-exocytosis
go-granulocyte-migration1	6.28127e-124	1.38116	1	0.915	4.68897e-120	3	go-granulocyte-migration
go-defense-response1	6.92929e-123	0.554136	1	1	5.17271e-119	3	go-defense-response
go-leukocyte-chemotaxis1	1.76569e-119	0.844494	1	0.997	1.31808e-115	3	go-leukocyte-chemotaxis
go-superoxide-anion-generation1	7.21683e-119	1.22536	0.973	0.668	5.38736e-115	3	go-superoxide-anion-generation
go-glial-cell-activation1	9.68185e-116	1.33398	0.964	0.599	7.2275e-112	3	go-glial-cell-activation
go-collagen-catabolic-process	1.37128e-115	0.395694	0.717	0.207	1.02366e-111	3	go-collagen-catabolic-process
go-cytoplasmic-vesicle-part1	3.7614e-115	0.563894	1	1	2.80789e-111	3	go-cytoplasmic-vesicle-part
go-response-to-axon-injury1	6.76696e-115	1.3326	0.991	0.786	5.05154e-111	3	go-response-to-axon-injury
go-regulation-of-response-to-external-stimulus1	1.42176e-114	0.751365	1	1	1.06134e-110	3	go-regulation-of-response-to-external-stimulus
go-laminin-binding	2.91292e-113	1.05036	0.836	0.338	2.17449e-109	3	go-laminin-binding
go-leukocyte-migration-involved-in-inflammatory-response1	1.46255e-112	1.11869	0.562	0.115	1.09179e-108	3	go-leukocyte-migration-involved-in-inflammatory-response
go-immune-effector-process1	5.13975e-112	0.508456	1	1	3.83683e-108	3	go-immune-effector-process
go-neuroinflammatory-response1	5.3416e-112	1.30997	0.97	0.621	3.98751e-108	3	go-neuroinflammatory-response
go-cell-activation1	1.08563e-111	0.4904	1	1	8.10425e-108	3	go-cell-activation
go-interleukin-6-production1	4.61899e-111	1.22522	1	0.934	3.44808e-107	3	go-interleukin-6-production
go-leukocyte-activation-involved-in-inflammatory-response1	1.1002e-110	1.28739	0.958	0.581	8.21299e-107	3	go-leukocyte-activation-involved-in-inflammatory-response
go-response-to-molecule-of-bacterial-origin1	1.1163e-110	0.817225	1	0.998	8.33317e-107	3	go-response-to-molecule-of-bacterial-origin
go-defense-response-to-other-organism1	3.82546e-107	0.849245	1	0.997	2.8557e-103	3	go-defense-response-to-other-organism
go-vacuolar-lumen1	3.19541e-106	0.805547	1	0.998	2.38537e-102	3	go-vacuolar-lumen
go-monocarboxylic-acid-binding	1.73137e-105	0.455979	0.899	0.368	1.29247e-101	3	go-monocarboxylic-acid-binding
go-positive-regulation-of-secretion1	1.33292e-104	1.03844	1	0.973	9.95022e-101	3	go-positive-regulation-of-secretion
go-response-to-wounding1	1.4979e-103	0.753102	1	0.995	1.11818e-99	3	go-response-to-wounding
go-superoxide-metabolic-process1	1.42035e-102	1.13911	0.988	0.894	1.06029e-98	3	go-superoxide-metabolic-process
go-immunoglobulin-binding1	2.30021e-102	0.929217	0.658	0.17	1.71711e-98	3	go-immunoglobulin-binding
go-positive-regulation-of-superoxide-anion-generation1	5.20501e-100	0.968904	0.952	0.59	3.88554e-96	3	go-positive-regulation-of-superoxide-anion-generation
go-tumor-necrosis-factor-superfamily-cytokine-production1	1.00536e-99	0.912598	1	0.99	7.50502e-96	3	go-tumor-necrosis-factor-superfamily-cytokine-production
go-response-to-oxygen-containing-compound1	3.57224e-99	0.497104	1	1	2.66668e-95	3	go-response-to-oxygen-containing-compound
go-platelet-degranulation1	4.92305e-99	0.80222	1	0.983	3.67505e-95	3	go-platelet-degranulation
go-response-to-biotic-stimulus1	1.04781e-98	0.493677	1	1	7.82191e-95	3	go-response-to-biotic-stimulus
go-innate-immune-response1	2.4235e-98	0.501827	1	1	1.80914e-94	3	go-innate-immune-response
go-positive-regulation-of-reactive-oxygen-species-metabolic-process1	8.13025e-98	1.02032	0.982	0.838	6.06923e-94	3	go-positive-regulation-of-reactive-oxygen-species-metabolic-process
go-azurophil-granule1	1.48173e-97	0.773118	1	0.997	1.10611e-93	3	go-azurophil-granule
go-cytokine-secretion1	9.00174e-97	0.947669	1	0.984	6.7198e-93	3	go-cytokine-secretion
go-regulation-of-superoxide-metabolic-process1	1.88524e-96	1.01863	0.973	0.756	1.40733e-92	3	go-regulation-of-superoxide-metabolic-process
go-interleukin-1-beta-production1	3.23341e-95	1.18889	0.976	0.783	2.41374e-91	3	go-interleukin-1-beta-production
go-regulation-of-superoxide-anion-generation1	4.68013e-95	0.998866	0.955	0.623	3.49372e-91	3	go-regulation-of-superoxide-anion-generation
go-pattern-recognition-receptor-signaling-pathway1	6.96918e-95	0.667479	1	0.999	5.20249e-91	3	go-pattern-recognition-receptor-signaling-pathway
go-vacuolar-part1	1.17047e-93	0.662093	1	1	8.73757e-90	3	go-vacuolar-part
go-reactive-oxygen-species-metabolic-process1	1.00242e-92	0.778251	1	0.995	7.48307e-89	3	go-reactive-oxygen-species-metabolic-process
go-secretory-granule-membrane1	1.27708e-91	0.797745	1	0.994	9.53339e-88	3	go-secretory-granule-membrane
go-interleukin-8-secretion1	1.96854e-91	1.08777	0.929	0.607	1.46951e-87	3	go-interleukin-8-secretion
go-cytokine-production1	3.17472e-91	0.485032	1	1	2.36993e-87	3	go-cytokine-production
go-osteoclast-differentiation1	5.46413e-91	1.17244	0.997	0.914	4.07897e-87	3	go-osteoclast-differentiation
go-interleukin-1-production1	6.03222e-90	1.13674	0.982	0.84	4.50305e-86	3	go-interleukin-1-production
go-negative-regulation-of-multicellular-organismal-process1	8.56294e-88	0.769996	1	0.995	6.39223e-84	3	go-negative-regulation-of-multicellular-organismal-process
go-vacuole1	1.11946e-87	0.597656	1	1	8.35676e-84	3	go-vacuole
go-regulation-of-reactive-oxygen-species-biosynthetic-process1	4.0443e-87	0.822213	0.994	0.975	3.01907e-83	3	go-regulation-of-reactive-oxygen-species-biosynthetic-process
go-toll-like-receptor-signaling-pathway1	1.77389e-86	0.601156	1	0.999	1.32421e-82	3	go-toll-like-receptor-signaling-pathway
go-ficolin-1-rich-granule1	2.40486e-86	0.471439	1	1	1.79523e-82	3	go-ficolin-1-rich-granule
go-antimicrobial-humoral-response	1.41843e-85	1.4514	1	0.982	1.05886e-81	3	go-antimicrobial-humoral-response
go-positive-regulation-of-interleukin-8-secretion1	2.4123e-85	1.07285	0.571	0.16	1.80079e-81	3	go-positive-regulation-of-interleukin-8-secretion
go-ion-transport1	3.04972e-84	0.53459	1	1	2.27662e-80	3	go-ion-transport
go-positive-regulation-of-interleukin-8-production1	8.04248e-84	0.959678	0.827	0.396	6.00371e-80	3	go-positive-regulation-of-interleukin-8-production
go-positive-regulation-of-cytokine-secretion1	1.46912e-83	1.13173	0.991	0.903	1.0967e-79	3	go-positive-regulation-of-cytokine-secretion
go-positive-regulation-of-tumor-necrosis-factor-superfamily-cytokine-production1	2.40035e-83	0.887239	0.997	0.959	1.79186e-79	3	go-positive-regulation-of-tumor-necrosis-factor-superfamily-cytokine-production
go-regulation-of-viral-entry-into-host-cell1	4.25947e-83	0.901744	0.967	0.772	3.1797e-79	3	go-regulation-of-viral-entry-into-host-cell
go-positive-regulation-of-peptide-secretion1	6.48595e-83	0.957954	0.997	0.966	4.84177e-79	3	go-positive-regulation-of-peptide-secretion
go-respiratory-burst1	7.50098e-83	0.663365	0.991	0.957	5.59948e-79	3	go-respiratory-burst
go-locomotion1	7.63868e-83	0.550995	1	1	5.70228e-79	3	go-locomotion
go-platelet-alpha-granule1	3.56182e-81	1.05477	0.985	0.855	2.6589e-77	3	go-platelet-alpha-granule
go-cellular-response-to-oxygen-containing-compound1	3.4316e-80	0.530253	1	1	2.56169e-76	3	go-cellular-response-to-oxygen-containing-compound
go-macrophage-activation1	7.59212e-80	1.06284	0.988	0.93	5.66752e-76	3	go-macrophage-activation
go-vesicle-membrane1	4.46116e-79	0.465216	1	1	3.33026e-75	3	go-vesicle-membrane
go-toll-like-receptor-binding1	6.14345e-79	1.06013	0.446	0.096	4.58609e-75	3	go-toll-like-receptor-binding
go-regulation-of-defense-response1	7.72359e-79	0.419895	1	1	5.76566e-75	3	go-regulation-of-defense-response
go-cell-motility1	1.34739e-78	0.52529	1	1	1.00582e-74	3	go-cell-motility
go-cellular-response-to-toxic-substance1	2.7295e-78	0.658368	1	0.997	2.03757e-74	3	go-cellular-response-to-toxic-substance
go-organic-acid-binding	5.31977e-78	0.31334	0.958	0.484	3.97121e-74	3	go-organic-acid-binding
go-regulation-of-peptidase-activity1	1.87645e-77	0.514236	1	0.999	1.40077e-73	3	go-regulation-of-peptidase-activity
go-phagocytosis1	3.14988e-77	0.531293	1	1	2.35139e-73	3	go-phagocytosis
go-ficolin-1-rich-granule-membrane1	4.17198e-77	1.03073	0.979	0.802	3.11439e-73	3	go-ficolin-1-rich-granule-membrane
go-regulation-of-secretion1	1.20576e-76	0.595457	1	0.998	9.00097e-73	3	go-regulation-of-secretion
go-azurophil-granule-lumen1	1.74313e-76	0.712432	1	0.98	1.30125e-72	3	go-azurophil-granule-lumen
go-endocytosis1	6.94344e-76	0.866471	1	0.976	5.18328e-72	3	go-endocytosis
go-peptide-secretion1	6.97113e-74	0.607688	1	0.998	5.20395e-70	3	go-peptide-secretion
go-peptidyl-cysteine-modification1	8.61799e-74	0.887878	0.961	0.566	6.43333e-70	3	go-peptidyl-cysteine-modification
go-lysosomal-lumen1	1.34302e-73	0.975427	0.976	0.942	1.00256e-69	3	go-lysosomal-lumen
go-leukocyte-migration1	2.31655e-73	0.562182	1	1	1.7293e-69	3	go-leukocyte-migration
go-platelet-alpha-granule-lumen1	2.33426e-73	1.00248	0.979	0.824	1.74252e-69	3	go-platelet-alpha-granule-lumen
go-specific-granule1	2.35416e-73	0.760521	0.997	0.988	1.75738e-69	3	go-specific-granule
go-glial-cell-development1	1.31056e-72	0.972774	0.964	0.707	9.78333e-69	3	go-glial-cell-development
go-regeneration1	1.76546e-72	0.851889	1	0.991	1.31792e-68	3	go-regeneration
go-extracellular-matrix-binding	2.10757e-72	0.879197	0.893	0.552	1.5733e-68	3	go-extracellular-matrix-binding
go-interleukin-8-production1	2.12165e-72	1.0517	0.976	0.845	1.58381e-68	3	go-interleukin-8-production
go-cellular-response-to-biotic-stimulus1	1.40222e-71	0.725236	1	0.994	1.04676e-67	3	go-cellular-response-to-biotic-stimulus
go-negative-regulation-of-leukocyte-proliferation1	5.68831e-71	0.989536	0.988	0.732	4.24633e-67	3	go-negative-regulation-of-leukocyte-proliferation
go-acute-inflammatory-response1	5.96346e-71	1.12592	0.979	0.748	4.45172e-67	3	go-acute-inflammatory-response
go-response-to-drug	1.01861e-70	0.380641	1	1	7.60392e-67	3	go-response-to-drug
go-positive-regulation-of-ion-transport1	2.31448e-70	0.898988	0.997	0.951	1.72776e-66	3	go-positive-regulation-of-ion-transport
go-amide-binding	2.33272e-70	0.535625	1	1	1.74138e-66	3	go-amide-binding
go-reactive-oxygen-species-biosynthetic-process1	4.82852e-70	0.72638	0.994	0.982	3.60449e-66	3	go-reactive-oxygen-species-biosynthetic-process
go-regulation-of-peptide-secretion1	9.43921e-70	0.555108	1	0.998	7.04637e-66	3	go-regulation-of-peptide-secretion
go-antioxidant-activity1	2.12751e-69	0.864386	0.991	0.903	1.58818e-65	3	go-antioxidant-activity
go-response-to-toxic-substance	2.27476e-69	0.399909	1	1	1.69811e-65	3	go-response-to-toxic-substance
go-regulation-of-reactive-oxygen-species-metabolic-process1	1.2209e-68	0.713553	0.994	0.975	9.11405e-65	3	go-regulation-of-reactive-oxygen-species-metabolic-process
go-antigen-processing-and-presentation-of-peptide-or-polysaccharide-antigen-via-mhc-class-ii1	1.36637e-68	0.793613	0.997	0.97	1.01999e-64	3	go-antigen-processing-and-presentation-of-peptide-or-polysaccharide-antigen-via-mhc-class-ii
go-positive-regulation-of-cytokine-production1	1.57188e-68	0.427366	1	1	1.17341e-64	3	go-positive-regulation-of-cytokine-production
go-negative-regulation-of-peptidase-activity1	2.3835e-68	0.821532	1	0.964	1.77928e-64	3	go-negative-regulation-of-peptidase-activity
go-vacuolar-membrane1	6.32475e-68	0.552853	1	1	4.72142e-64	3	go-vacuolar-membrane
go-pattern-recognition-receptor-activity1	1.78842e-67	0.615848	0.378	0.073	1.33505e-63	3	go-pattern-recognition-receptor-activity
go-negative-regulation-of-smooth-muscle-cell-proliferation1	3.96319e-67	0.540958	0.821	0.401	2.95852e-63	3	go-negative-regulation-of-smooth-muscle-cell-proliferation
go-positive-regulation-of-defense-response1	5.99116e-67	0.388646	1	1	4.4724e-63	3	go-positive-regulation-of-defense-response
go-positive-regulation-of-reactive-oxygen-species-biosynthetic-process1	2.31597e-66	0.775339	0.979	0.931	1.72887e-62	3	go-positive-regulation-of-reactive-oxygen-species-biosynthetic-process
go-interleukin-10-production1	2.67183e-66	0.919567	0.923	0.59	1.99452e-62	3	go-interleukin-10-production
go-regulation-of-leukocyte-proliferation1	1.85803e-65	0.471802	1	0.999	1.38702e-61	3	go-regulation-of-leukocyte-proliferation
go-leukocyte-aggregation1	2.85961e-65	0.926097	0.771	0.396	2.1347e-61	3	go-leukocyte-aggregation
go-cellular-response-to-lipoprotein-particle-stimulus1	3.67759e-65	0.454979	0.622	0.226	2.74532e-61	3	go-cellular-response-to-lipoprotein-particle-stimulus
go-regulation-of-response-to-wounding1	6.03839e-65	0.250147	0.89	0.453	4.50765e-61	3	go-regulation-of-response-to-wounding
go-import-into-cell1	1.00074e-64	0.829051	1	0.966	7.47051e-61	3	go-import-into-cell
go-myeloid-leukocyte-differentiation1	3.61665e-64	0.630383	1	0.99	2.69983e-60	3	go-myeloid-leukocyte-differentiation
go-specific-granule-lumen1	1.18894e-63	1.07442	0.961	0.78	8.87541e-60	3	go-specific-granule-lumen
go-protease-binding1	1.40373e-62	0.71467	0.997	0.976	1.04788e-58	3	go-protease-binding
go-integrin-mediated-signaling-pathway1	5.89142e-62	0.917855	0.982	0.788	4.39794e-58	3	go-integrin-mediated-signaling-pathway
go-regulation-of-osteoclast-differentiation1	6.20389e-62	0.70638	0.911	0.532	4.6312e-58	3	go-regulation-of-osteoclast-differentiation
go-production-of-molecular-mediator-involved-in-inflammatory-response1	1.22408e-61	0.88572	0.97	0.897	9.13776e-58	3	go-production-of-molecular-mediator-involved-in-inflammatory-response
go-azurophil-granule-membrane1	1.58893e-61	0.823387	0.964	0.845	1.18613e-57	3	go-azurophil-granule-membrane
go-response-to-nitrogen-compound1	2.86215e-61	0.384885	1	1	2.1366e-57	3	go-response-to-nitrogen-compound
go-positive-regulation-of-interleukin-6-secretion1	8.14048e-61	0.917404	0.717	0.348	6.07687e-57	3	go-positive-regulation-of-interleukin-6-secretion
go-detoxification1	8.20324e-61	0.848501	0.994	0.922	6.12372e-57	3	go-detoxification
go-positive-regulation-of-transport1	1.39906e-59	0.4034	1	1	1.0444e-55	3	go-positive-regulation-of-transport
go-positive-regulation-of-multicellular-organismal-process1	1.79276e-59	0.407495	1	1	1.33829e-55	3	go-positive-regulation-of-multicellular-organismal-process
go-positive-regulation-of-chemokine-production1	2.5718e-59	0.810747	0.881	0.538	1.91985e-55	3	go-positive-regulation-of-chemokine-production
go-humoral-immune-response	2.67947e-59	1.12866	0.997	0.871	2.00023e-55	3	go-humoral-immune-response
go-endolysosome1	2.08709e-58	0.85846	0.637	0.26	1.55801e-54	3	go-endolysosome
go-regulation-of-myeloid-cell-differentiation1	3.43455e-58	0.50004	1	0.999	2.56389e-54	3	go-regulation-of-myeloid-cell-differentiation
go-release-of-cytochrome-c-from-mitochondria1	4.42362e-58	0.771617	0.967	0.864	3.30223e-54	3	go-release-of-cytochrome-c-from-mitochondria
go-antigen-processing-and-presentation1	5.9599e-58	0.408291	1	1	4.44907e-54	3	go-antigen-processing-and-presentation
go-peptide-binding	1.2871e-57	0.468342	1	1	9.6082e-54	3	go-peptide-binding
go-cation-transport	3.43605e-57	0.410983	1	1	2.56501e-53	3	go-cation-transport
go-activation-of-innate-immune-response1	3.75864e-57	0.379891	1	1	2.80582e-53	3	go-activation-of-innate-immune-response
go-regulation-of-ion-transport1	1.82764e-56	0.728331	1	0.978	1.36433e-52	3	go-regulation-of-ion-transport
go-wound-healing1	9.19854e-56	0.616528	1	0.988	6.86671e-52	3	go-wound-healing
go-endosome-lumen1	9.94088e-55	0.775399	0.81	0.466	7.42087e-51	3	go-endosome-lumen
go-myeloid-cell-differentiation1	1.84125e-54	0.379297	1	1	1.37449e-50	3	go-myeloid-cell-differentiation
go-cellular-detoxification1	2.38336e-54	0.776977	0.994	0.925	1.77917e-50	3	go-cellular-detoxification
go-negative-regulation-of-cytokine-production1	2.70856e-54	0.515148	1	0.995	2.02194e-50	3	go-negative-regulation-of-cytokine-production
go-regulation-of-transport1	5.22717e-54	0.368308	1	1	3.90208e-50	3	go-regulation-of-transport
go-cellular-response-to-oxidative-stress1	1.36396e-53	0.50316	1	1	1.01819e-49	3	go-cellular-response-to-oxidative-stress
go-positive-regulation-of-nf-kappab-transcription-factor-activity	2.70681e-53	0.403668	1	0.999	2.02063e-49	3	go-positive-regulation-of-nf-kappab-transcription-factor-activity
go-neuron-apoptotic-process1	9.80575e-53	0.66294	1	0.978	7.32e-49	3	go-neuron-apoptotic-process
go-response-to-alcohol	1.12108e-52	0.429898	1	1	8.36887e-49	3	go-response-to-alcohol
go-positive-regulation-of-interleukin-1-production1	1.18798e-52	0.809333	0.848	0.523	8.8683e-49	3	go-positive-regulation-of-interleukin-1-production
go-response-to-thyroid-hormone1	1.64262e-52	0.841522	0.69	0.342	1.22622e-48	3	go-response-to-thyroid-hormone
go-response-to-ethanol	1.66489e-52	0.550376	1	0.997	1.24284e-48	3	go-response-to-ethanol
go-carbohydrate-binding1	2.26757e-52	0.726632	0.976	0.696	1.69274e-48	3	go-carbohydrate-binding
go-positive-regulation-of-neuron-apoptotic-process1	4.81432e-52	0.872772	0.926	0.798	3.59389e-48	3	go-positive-regulation-of-neuron-apoptotic-process
go-monocyte-chemotaxis	6.74245e-52	0.906746	0.979	0.912	5.03324e-48	3	go-monocyte-chemotaxis
go-regulation-of-mast-cell-activation-involved-in-immune-response1	8.50109e-52	0.839837	0.798	0.446	6.34606e-48	3	go-regulation-of-mast-cell-activation-involved-in-immune-response
go-regulation-of-cell-activation1	5.00389e-51	0.381072	1	1	3.73541e-47	3	go-regulation-of-cell-activation
go-ruffle1	6.78526e-51	0.504197	1	1	5.06519e-47	3	go-ruffle
go-nitric-oxide-biosynthetic-process1	1.45014e-50	0.835993	0.946	0.809	1.08253e-46	3	go-nitric-oxide-biosynthetic-process
go-peptidase-regulator-activity1	3.73598e-50	0.755101	0.997	0.944	2.78891e-46	3	go-peptidase-regulator-activity
go-anatomical-structure-formation-involved-in-morphogenesis1	2.01511e-49	0.814404	0.994	0.86	1.50428e-45	3	go-anatomical-structure-formation-involved-in-morphogenesis
go-negative-regulation-of-chemotaxis	5.22254e-49	0.363735	0.875	0.527	3.89863e-45	3	go-negative-regulation-of-chemotaxis
go-regulation-of-mast-cell-activation1	5.26775e-49	0.770501	0.833	0.48	3.93237e-45	3	go-regulation-of-mast-cell-activation
go-fatty-acid-derivative-binding1	1.71646e-48	0.806014	0.667	0.332	1.28134e-44	3	go-fatty-acid-derivative-binding
go-antigen-processing-and-presentation-of-peptide-antigen1	2.30911e-48	0.357199	1	1	1.72375e-44	3	go-antigen-processing-and-presentation-of-peptide-antigen
go-negative-regulation-of-immune-system-process1	3.24453e-48	0.40304	1	1	2.42204e-44	3	go-negative-regulation-of-immune-system-process
go-regulation-of-neuroinflammatory-response1	2.16741e-47	0.506406	0.646	0.306	1.61797e-43	3	go-regulation-of-neuroinflammatory-response
go-glutathione-peroxidase-activity1	3.70952e-47	0.806893	0.807	0.53	2.76916e-43	3	go-glutathione-peroxidase-activity
go-regulation-of-respiratory-burst1	5.08616e-47	0.759235	0.693	0.384	3.79682e-43	3	go-regulation-of-respiratory-burst
go-chemical-homeostasis1	6.59565e-47	0.44296	1	1	4.92365e-43	3	go-chemical-homeostasis
go-regulation-of-myeloid-leukocyte-mediated-immunity1	7.63888e-47	0.787959	0.926	0.822	5.70242e-43	3	go-regulation-of-myeloid-leukocyte-mediated-immunity
go-positive-regulation-of-neuron-death1	1.01363e-46	0.651345	0.994	0.958	7.56675e-43	3	go-positive-regulation-of-neuron-death
go-negative-regulation-of-mitochondrion-organization1	1.02223e-46	0.64007	0.842	0.531	7.63098e-43	3	go-negative-regulation-of-mitochondrion-organization
go-response-to-lipid1	1.54811e-46	0.367248	1	0.999	1.15567e-42	3	go-response-to-lipid
go-tertiary-granule-membrane1	4.50445e-46	0.724808	0.976	0.903	3.36257e-42	3	go-tertiary-granule-membrane
go-regulation-of-innate-immune-response1	4.7332e-46	0.320002	1	1	3.53333e-42	3	go-regulation-of-innate-immune-response
go-regulation-of-leukocyte-degranulation1	6.38564e-46	0.791435	0.905	0.688	4.76688e-42	3	go-regulation-of-leukocyte-degranulation
go-positive-regulation-of-myeloid-leukocyte-mediated-immunity1	7.13949e-46	0.775912	0.83	0.586	5.32963e-42	3	go-positive-regulation-of-myeloid-leukocyte-mediated-immunity
go-regulation-of-acute-inflammatory-response	3.10465e-45	0.765515	0.815	0.537	2.31762e-41	3	go-regulation-of-acute-inflammatory-response
go-endocytic-vesicle-membrane	3.10491e-44	0.308889	1	1	2.31781e-40	3	go-endocytic-vesicle-membrane
go-negative-regulation-of-hydrolase-activity1	4.54534e-44	0.585964	1	0.985	3.3931e-40	3	go-negative-regulation-of-hydrolase-activity
go-clathrin-coated-endocytic-vesicle1	9.9077e-44	0.658779	0.958	0.748	7.3961e-40	3	go-clathrin-coated-endocytic-vesicle
go-clathrin-coated-endocytic-vesicle-membrane1	1.03684e-43	0.647674	0.94	0.665	7.74e-40	3	go-clathrin-coated-endocytic-vesicle-membrane
go-response-to-corticosteroid	1.17206e-43	0.50802	1	0.995	8.74944e-40	3	go-response-to-corticosteroid
go-receptor-mediated-endocytosis1	1.77615e-43	0.743205	0.991	0.851	1.3259e-39	3	go-receptor-mediated-endocytosis
go-actin-filament-based-process1	2.1716e-43	0.320335	1	1	1.6211e-39	3	go-actin-filament-based-process
go-negative-regulation-of-proteolysis	2.47759e-43	0.388862	1	1	1.84952e-39	3	go-negative-regulation-of-proteolysis
go-regulation-of-antigen-processing-and-presentation1	4.30255e-43	0.746198	0.631	0.303	3.21186e-39	3	go-regulation-of-antigen-processing-and-presentation
go-astrocyte-differentiation1	5.60269e-43	0.480728	0.881	0.578	4.18241e-39	3	go-astrocyte-differentiation
go-mononuclear-cell-migration1	1.65793e-42	0.818198	0.991	0.945	1.23764e-38	3	go-mononuclear-cell-migration
go-supramolecular-fiber-organization	1.7759e-42	0.302419	1	1	1.32571e-38	3	go-supramolecular-fiber-organization
go-negative-regulation-of-smooth-muscle-cell-migration	2.97884e-42	0.260618	0.485	0.193	2.22371e-38	3	go-negative-regulation-of-smooth-muscle-cell-migration
go-tube-morphogenesis1	3.67318e-42	0.789364	0.994	0.887	2.74203e-38	3	go-tube-morphogenesis
go-interleukin-6-secretion1	3.78882e-41	0.658061	0.729	0.419	2.82835e-37	3	go-interleukin-6-secretion
go-endocytic-vesicle	4.51938e-41	0.292386	1	1	3.37372e-37	3	go-endocytic-vesicle
go-actin-filament-polymerization	9.84434e-41	0.299888	1	1	7.3488e-37	3	go-actin-filament-polymerization
go-regulation-of-cell-population-proliferation1	1.51428e-40	0.291701	1	1	1.13041e-36	3	go-regulation-of-cell-population-proliferation
go-response-to-zinc-ion	1.75444e-40	0.290141	0.634	0.331	1.30969e-36	3	go-response-to-zinc-ion
go-oxidoreductase-activity	5.46138e-40	0.298115	1	1	4.07692e-36	3	go-oxidoreductase-activity
go-regulation-of-release-of-cytochrome-c-from-mitochondria1	8.43604e-40	0.706463	0.893	0.66	6.29751e-36	3	go-regulation-of-release-of-cytochrome-c-from-mitochondria
go-maintenance-of-location	2.02639e-39	0.359226	1	1	1.5127e-35	3	go-maintenance-of-location
go-negative-regulation-of-response-to-external-stimulus1	5.39809e-39	0.758451	0.994	0.923	4.02968e-35	3	go-negative-regulation-of-response-to-external-stimulus
go-regulation-of-cell-development1	9.29763e-39	0.733915	1	0.955	6.94068e-35	3	go-regulation-of-cell-development
go-late-endosome-membrane1	1.14169e-38	0.535571	0.997	0.973	8.52273e-35	3	go-late-endosome-membrane
go-response-to-electrical-stimulus	2.49262e-38	0.359329	0.735	0.408	1.86074e-34	3	go-response-to-electrical-stimulus
go-positive-regulation-of-leukocyte-degranulation1	3.27721e-38	0.75441	0.705	0.416	2.44644e-34	3	go-positive-regulation-of-leukocyte-degranulation
go-regulation-of-myeloid-leukocyte-differentiation1	3.81377e-38	0.599458	0.994	0.981	2.84698e-34	3	go-regulation-of-myeloid-leukocyte-differentiation
go-protein-localization-to-cell-surface1	4.29799e-38	0.675187	0.958	0.723	3.20845e-34	3	go-protein-localization-to-cell-surface
go-circulatory-system-development1	1.67024e-37	0.604006	0.97	0.79	1.24683e-33	3	go-circulatory-system-development
go-mhc-class-ii-protein-complex1	2.05739e-37	0.436298	0.896	0.515	1.53584e-33	3	go-mhc-class-ii-protein-complex
go-regulation-of-leukocyte-migration1	7.41223e-37	0.473478	1	0.994	5.53323e-33	3	go-regulation-of-leukocyte-migration
go-positive-regulation-of-cell-activation1	8.04616e-37	0.327176	1	1	6.00646e-33	3	go-positive-regulation-of-cell-activation
go-late-endosome1	1.36238e-36	0.401616	1	0.999	1.01702e-32	3	go-late-endosome
go-endosomal-part1	2.20462e-36	0.303487	1	1	1.64575e-32	3	go-endosomal-part
go-activation-of-immune-response1	3.80606e-36	0.25019	1	1	2.84122e-32	3	go-activation-of-immune-response
go-neuron-projection-regeneration	7.36388e-36	0.277118	0.625	0.333	5.49713e-32	3	go-neuron-projection-regeneration
go-negative-regulation-of-apoptotic-signaling-pathway1	1.06834e-35	0.402969	1	0.997	7.97512e-32	3	go-negative-regulation-of-apoptotic-signaling-pathway
go-negative-regulation-of-cell-activation1	1.20762e-35	0.614343	0.997	0.971	9.01489e-32	3	go-negative-regulation-of-cell-activation
go-regulation-of-anatomical-structure-morphogenesis1	1.22978e-35	0.417803	1	0.996	9.18029e-32	3	go-regulation-of-anatomical-structure-morphogenesis
go-extracellular-matrix-disassembly1	1.39666e-35	0.545434	0.89	0.613	1.0426e-31	3	go-extracellular-matrix-disassembly
go-activation-of-cysteine-type-endopeptidase-activity-involved-in-apoptotic-process1	1.5132e-35	0.652418	0.979	0.902	1.12961e-31	3	go-activation-of-cysteine-type-endopeptidase-activity-involved-in-apoptotic-process
go-toll-like-receptor-4-signaling-pathway1	1.66691e-35	0.42711	0.524	0.245	1.24435e-31	3	go-toll-like-receptor-4-signaling-pathway
go-cell-cell-signaling1	2.0891e-35	0.468899	1	0.994	1.55952e-31	3	go-cell-cell-signaling
go-carbohydrate-derivative-transport1	2.28578e-35	0.719638	0.964	0.883	1.70633e-31	3	go-carbohydrate-derivative-transport
go-positive-regulation-of-interleukin-10-production1	2.53328e-35	0.734705	0.693	0.439	1.89109e-31	3	go-positive-regulation-of-interleukin-10-production
go-zinc-ion-homeostasis	2.54466e-35	0.315686	0.592	0.299	1.89959e-31	3	go-zinc-ion-homeostasis
go-response-to-antibiotic	2.90743e-35	0.263395	1	1	2.1704e-31	3	go-response-to-antibiotic
go-nadph-oxidase-complex1	3.39156e-35	0.720871	0.321	0.101	2.5318e-31	3	go-nadph-oxidase-complex
go-regulation-of-proteolysis1	3.65324e-35	0.265083	1	1	2.72715e-31	3	go-regulation-of-proteolysis
go-interleukin-6-biosynthetic-process1	4.04124e-35	0.552302	0.378	0.137	3.01678e-31	3	go-interleukin-6-biosynthetic-process
go-blood-vessel-morphogenesis1	5.74407e-35	0.630486	0.97	0.761	4.28795e-31	3	go-blood-vessel-morphogenesis
go-axon-regeneration	7.18541e-35	0.293567	0.604	0.316	5.36391e-31	3	go-axon-regeneration
go-s100-protein-binding1	1.51268e-34	0.583478	0.798	0.539	1.12922e-30	3	go-s100-protein-binding
go-oxidoreductase-activity-acting-on-peroxide-as-acceptor1	1.56505e-34	0.638771	0.932	0.818	1.16831e-30	3	go-oxidoreductase-activity-acting-on-peroxide-as-acceptor
go-transition-metal-ion-transport1	1.63212e-34	0.688608	1	0.995	1.21838e-30	3	go-transition-metal-ion-transport
go-endoplasmic-reticulum-lumen1	2.30057e-34	0.714066	0.991	0.863	1.71738e-30	3	go-endoplasmic-reticulum-lumen
go-positive-regulation-of-viral-entry-into-host-cell1	3.93716e-34	0.760066	0.542	0.275	2.93909e-30	3	go-positive-regulation-of-viral-entry-into-host-cell
go-positive-regulation-of-interleukin-1-secretion1	6.44086e-34	0.603265	0.631	0.343	4.8081e-30	3	go-positive-regulation-of-interleukin-1-secretion
go-positive-regulation-of-leukocyte-migration1	1.09273e-33	0.518495	0.991	0.979	8.15724e-30	3	go-positive-regulation-of-leukocyte-migration
go-negative-regulation-of-tumor-necrosis-factor-superfamily-cytokine-production1	1.47738e-33	0.34869	0.717	0.414	1.10286e-29	3	go-negative-regulation-of-tumor-necrosis-factor-superfamily-cytokine-production
go-antibiotic-metabolic-process1	1.52569e-33	0.569386	0.991	0.977	1.13893e-29	3	go-antibiotic-metabolic-process
go-superoxide-generating-nadph-oxidase-activity1	1.55474e-33	0.633148	0.274	0.077	1.16062e-29	3	go-superoxide-generating-nadph-oxidase-activity
go-regulation-of-cysteine-type-endopeptidase-activity1	3.42041e-33	0.333092	1	1	2.55333e-29	3	go-regulation-of-cysteine-type-endopeptidase-activity
go-neurotransmitter-biosynthetic-process1	3.97554e-33	0.709754	0.946	0.813	2.96774e-29	3	go-neurotransmitter-biosynthetic-process
go-sterol-transport	8.41459e-33	0.274802	0.896	0.591	6.28149e-29	3	go-sterol-transport
go-regulation-of-cellular-component-movement1	3.59569e-32	0.388756	1	1	2.68418e-28	3	go-regulation-of-cellular-component-movement
go-ephrin-receptor-signaling-pathway	5.62981e-32	0.354662	0.997	0.992	4.20265e-28	3	go-ephrin-receptor-signaling-pathway
go-entry-into-other-organism-involved-in-symbiotic-interaction1	6.21169e-32	0.453307	0.994	0.992	4.63703e-28	3	go-entry-into-other-organism-involved-in-symbiotic-interaction
go-endopeptidase-regulator-activity1	6.482e-32	0.683846	0.994	0.916	4.83882e-28	3	go-endopeptidase-regulator-activity
go-carbohydrate-derivative-catabolic-process1	7.16938e-32	0.676845	0.979	0.821	5.35194e-28	3	go-carbohydrate-derivative-catabolic-process
go-long-chain-fatty-acid-binding	7.82176e-32	0.714371	0.295	0.093	5.83894e-28	3	go-long-chain-fatty-acid-binding
go-positive-regulation-of-mast-cell-activation-involved-in-immune-response1	1.01175e-31	0.672663	0.372	0.147	7.55275e-28	3	go-positive-regulation-of-mast-cell-activation-involved-in-immune-response
go-cardiovascular-system-development1	1.07661e-31	0.635378	0.967	0.819	8.03688e-28	3	go-cardiovascular-system-development
go-tube-development1	3.00399e-31	0.656594	0.985	0.853	2.24248e-27	3	go-tube-development
go-gliogenesis1	3.98634e-31	0.618198	0.997	0.955	2.9758e-27	3	go-gliogenesis
go-cell-redox-homeostasis1	7.01373e-31	0.424541	1	0.975	5.23575e-27	3	go-cell-redox-homeostasis
go-negative-regulation-of-extrinsic-apoptotic-signaling-pathway1	8.5027e-31	0.711851	0.952	0.848	6.34726e-27	3	go-negative-regulation-of-extrinsic-apoptotic-signaling-pathway
go-positive-regulation-of-dna-binding-transcription-factor-activity	1.07355e-30	0.338805	1	0.999	8.01402e-27	3	go-positive-regulation-of-dna-binding-transcription-factor-activity
go-positive-regulation-of-regulated-secretory-pathway1	2.26052e-30	0.629602	0.786	0.565	1.68748e-26	3	go-positive-regulation-of-regulated-secretory-pathway
go-cation-transmembrane-transport	2.34104e-30	0.318962	1	1	1.74759e-26	3	go-cation-transmembrane-transport
go-biological-adhesion1	2.70599e-30	0.310016	1	1	2.02002e-26	3	go-biological-adhesion
go-positive-regulation-of-myeloid-leukocyte-differentiation	2.85845e-30	0.466127	0.979	0.957	2.13383e-26	3	go-positive-regulation-of-myeloid-leukocyte-differentiation
go-myeloid-leukocyte-cytokine-production1	2.86269e-30	0.630429	0.69	0.448	2.137e-26	3	go-myeloid-leukocyte-cytokine-production
go-membrane-invagination1	3.89553e-30	0.545506	0.967	0.742	2.90801e-26	3	go-membrane-invagination
go-inflammatory-response-to-antigenic-stimulus1	4.24826e-30	0.575881	0.929	0.86	3.17133e-26	3	go-inflammatory-response-to-antigenic-stimulus
go-oxidoreductase-activity-acting-on-nad-p-h-oxygen-as-acceptor1	5.58773e-30	0.633554	0.345	0.129	4.17124e-26	3	go-oxidoreductase-activity-acting-on-nad-p-h-oxygen-as-acceptor
go-positive-regulation-of-mast-cell-activation1	7.97359e-30	0.560608	0.378	0.155	5.95229e-26	3	go-positive-regulation-of-mast-cell-activation
go-response-to-peptide1	1.25876e-29	0.34445	1	0.998	9.39662e-26	3	go-response-to-peptide
go-response-to-mechanical-stimulus	1.67821e-29	0.494834	0.997	0.992	1.25278e-25	3	go-response-to-mechanical-stimulus
go-plasma-membrane-protein-complex	1.69545e-29	0.390778	1	0.999	1.26566e-25	3	go-plasma-membrane-protein-complex
go-antimicrobial-humoral-immune-response-mediated-by-antimicrobial-peptide	2.17243e-29	0.976204	0.985	0.927	1.62172e-25	3	go-antimicrobial-humoral-immune-response-mediated-by-antimicrobial-peptide
go-positive-regulation-of-developmental-process2	3.16456e-29	0.374444	1	0.997	2.36234e-25	3	go-positive-regulation-of-developmental-process
go-regulation-of-phagocytosis1	4.2192e-29	0.499683	0.982	0.961	3.14963e-25	3	go-regulation-of-phagocytosis
go-ruffle-membrane1	4.89681e-29	0.48877	0.997	0.996	3.65547e-25	3	go-ruffle-membrane
go-trans-golgi-network-membrane1	6.62484e-29	0.496139	0.973	0.882	4.94544e-25	3	go-trans-golgi-network-membrane
go-lysosome-localization1	7.49213e-29	0.667724	0.917	0.79	5.59287e-25	3	go-lysosome-localization
go-mast-cell-activation1	9.7699e-29	0.684565	0.893	0.73	7.29323e-25	3	go-mast-cell-activation
go-leukocyte-proliferation1	1.22949e-28	0.280964	1	1	9.17814e-25	3	go-leukocyte-proliferation
go-positive-regulation-of-peptidase-activity1	1.73778e-28	0.331415	1	0.997	1.29725e-24	3	go-positive-regulation-of-peptidase-activity
go-defense-response-to-gram-negative-bacterium	1.9445e-28	0.761087	0.988	0.882	1.45157e-24	3	go-defense-response-to-gram-negative-bacterium
go-cellular-response-to-nitrogen-compound1	2.79623e-28	0.357196	1	0.998	2.08738e-24	3	go-cellular-response-to-nitrogen-compound
go-lipopolysaccharide-mediated-signaling-pathway1	3.21108e-28	0.687953	0.89	0.784	2.39707e-24	3	go-lipopolysaccharide-mediated-signaling-pathway
go-ion-homeostasis1	3.82732e-28	0.34444	1	1	2.85709e-24	3	go-ion-homeostasis
go-response-to-interferon-gamma1	6.54857e-28	0.252703	1	1	4.88851e-24	3	go-response-to-interferon-gamma
go-rac-protein-signal-transduction1	6.7538e-28	0.599228	0.86	0.686	5.04171e-24	3	go-rac-protein-signal-transduction
go-glutathione-metabolic-process1	6.75848e-28	0.648377	0.839	0.684	5.0452e-24	3	go-glutathione-metabolic-process
go-fatty-acid-binding	9.47785e-28	0.33721	0.476	0.237	7.07522e-24	3	go-fatty-acid-binding
go-erk1-and-erk2-cascade1	9.90061e-28	0.45547	0.997	0.989	7.39081e-24	3	go-erk1-and-erk2-cascade
go-ruffle-assembly1	1.70392e-27	0.635466	0.908	0.772	1.27197e-23	3	go-ruffle-assembly
go-regulation-of-endocytosis1	3.0499e-27	0.52335	0.994	0.973	2.27675e-23	3	go-regulation-of-endocytosis
go-neurotransmitter-metabolic-process1	4.53363e-27	0.60675	0.952	0.816	3.38435e-23	3	go-neurotransmitter-metabolic-process
go-leading-edge-membrane1	4.87573e-27	0.611681	0.997	0.989	3.63973e-23	3	go-leading-edge-membrane
go-neuron-death1	5.3077e-27	0.368731	1	0.996	3.9622e-23	3	go-neuron-death
go-regulation-of-microglial-cell-activation1	8.41102e-27	0.537514	0.506	0.268	6.27882e-23	3	go-regulation-of-microglial-cell-activation
go-positive-regulation-of-cell-differentiation1	1.05506e-26	0.338461	1	0.998	7.87605e-23	3	go-positive-regulation-of-cell-differentiation
go-macrophage-activation-involved-in-immune-response1	1.39236e-26	0.63005	0.268	0.09	1.03939e-22	3	go-macrophage-activation-involved-in-immune-response
go-enzyme-inhibitor-activity	1.80642e-26	0.283198	1	1	1.34849e-22	3	go-enzyme-inhibitor-activity
go-i-kappab-kinase-nf-kappab-signaling	1.84306e-26	0.273027	1	1	1.37584e-22	3	go-i-kappab-kinase-nf-kappab-signaling
go-regulation-of-mononuclear-cell-migration1	1.88548e-26	0.636759	0.851	0.668	1.40751e-22	3	go-regulation-of-mononuclear-cell-migration
go-regulation-of-metal-ion-transport1	1.89067e-26	0.472572	1	0.983	1.41139e-22	3	go-regulation-of-metal-ion-transport
go-negative-regulation-of-response-to-oxidative-stress1	2.07736e-26	0.460562	0.812	0.573	1.55075e-22	3	go-negative-regulation-of-response-to-oxidative-stress
go-cellular-response-to-drug1	2.17435e-26	0.415945	1	0.997	1.62315e-22	3	go-cellular-response-to-drug
go-regulation-of-calcium-ion-transport1	3.18778e-26	0.535692	0.997	0.96	2.37968e-22	3	go-regulation-of-calcium-ion-transport
go-positive-regulation-of-nitric-oxide-biosynthetic-process1	7.44944e-26	0.636938	0.774	0.591	5.56101e-22	3	go-positive-regulation-of-nitric-oxide-biosynthetic-process
go-coagulation1	1.54328e-25	0.382283	1	0.993	1.15205e-21	3	go-coagulation
go-nucleoside-salvage1	1.64586e-25	0.634292	0.464	0.238	1.22863e-21	3	go-nucleoside-salvage
go-glycosyl-compound-catabolic-process1	1.72715e-25	0.319252	0.571	0.308	1.28931e-21	3	go-glycosyl-compound-catabolic-process
go-positive-regulation-of-myeloid-cell-differentiation	1.86895e-25	0.423777	0.991	0.981	1.39517e-21	3	go-positive-regulation-of-myeloid-cell-differentiation
go-monosaccharide-biosynthetic-process1	2.00581e-25	0.549444	0.952	0.929	1.49734e-21	3	go-monosaccharide-biosynthetic-process
go-negative-regulation-of-secretion1	2.70506e-25	0.522884	0.997	0.984	2.01932e-21	3	go-negative-regulation-of-secretion
go-trans-golgi-network1	5.13527e-25	0.44315	0.997	0.969	3.83348e-21	3	go-trans-golgi-network
go-secondary-lysosome	5.95266e-25	0.51237	0.795	0.642	4.44366e-21	3	go-secondary-lysosome
go-fibroblast-proliferation	6.00141e-25	0.482338	0.994	0.98	4.48005e-21	3	go-fibroblast-proliferation
go-ion-transmembrane-transport	7.07449e-25	0.314876	1	1	5.28111e-21	3	go-ion-transmembrane-transport
go-cellular-response-to-external-stimulus1	8.72501e-25	0.39485	0.997	0.996	6.51322e-21	3	go-cellular-response-to-external-stimulus
go-apoptotic-mitochondrial-changes1	8.85287e-25	0.422268	0.985	0.977	6.60867e-21	3	go-apoptotic-mitochondrial-changes
go-regulation-of-cytokine-production-involved-in-immune-response1	9.38962e-25	0.469763	0.985	0.982	7.00935e-21	3	go-regulation-of-cytokine-production-involved-in-immune-response
go-negative-regulation-of-viral-entry-into-host-cell1	9.52424e-25	0.64723	0.61	0.396	7.10985e-21	3	go-negative-regulation-of-viral-entry-into-host-cell
go-negative-regulation-of-transport1	1.17396e-24	0.314287	1	1	8.76364e-21	3	go-negative-regulation-of-transport
go-positive-regulation-of-adaptive-immune-response	1.24843e-24	0.280364	0.997	0.999	9.31952e-21	3	go-positive-regulation-of-adaptive-immune-response
go-positive-regulation-of-locomotion1	1.71939e-24	0.335742	1	0.999	1.28352e-20	3	go-positive-regulation-of-locomotion
go-cytokine-production-involved-in-immune-response1	1.97271e-24	0.461145	0.991	0.987	1.47263e-20	3	go-cytokine-production-involved-in-immune-response
go-extrinsic-apoptotic-signaling-pathway1	1.9822e-24	0.445093	1	0.979	1.47971e-20	3	go-extrinsic-apoptotic-signaling-pathway
go-regulation-of-inflammatory-response-to-antigenic-stimulus1	2.11441e-24	0.596588	0.765	0.575	1.57841e-20	3	go-regulation-of-inflammatory-response-to-antigenic-stimulus
go-receptor-metabolic-process1	2.82274e-24	0.537369	0.976	0.924	2.10717e-20	3	go-receptor-metabolic-process
go-animal-organ-regeneration1	3.66114e-24	0.440403	0.985	0.983	2.73304e-20	3	go-animal-organ-regeneration
go-mast-cell-mediated-immunity1	4.99086e-24	0.592687	0.833	0.63	3.72568e-20	3	go-mast-cell-mediated-immunity
go-regulation-of-body-fluid-levels1	5.51141e-24	0.356939	1	0.996	4.11427e-20	3	go-regulation-of-body-fluid-levels
go-iron-ion-transport	5.91187e-24	0.475681	1	0.997	4.41321e-20	3	go-iron-ion-transport
go-igg-binding1	9.34004e-24	0.619348	0.283	0.107	6.97234e-20	3	go-igg-binding
go-growth1	1.7414e-23	0.415021	0.997	0.986	1.29995e-19	3	go-growth
go-actin-filament1	2.33973e-23	0.447574	0.973	0.957	1.74661e-19	3	go-actin-filament
go-negative-regulation-of-lymphocyte-activation1	2.60283e-23	0.453391	0.997	0.983	1.94301e-19	3	go-negative-regulation-of-lymphocyte-activation
go-calcium-ion-binding	5.33697e-23	0.592293	0.994	0.857	3.98405e-19	3	go-calcium-ion-binding
go-regulation-of-vesicle-mediated-transport1	5.93771e-23	0.293863	1	0.998	4.4325e-19	3	go-regulation-of-vesicle-mediated-transport
go-signaling-receptor-binding1	6.39214e-23	0.267513	1	0.999	4.77173e-19	3	go-signaling-receptor-binding
go-membrane-biogenesis	6.94579e-23	0.33405	0.619	0.386	5.18503e-19	3	go-membrane-biogenesis
go-cellular-response-to-thyroid-hormone-stimulus1	7.3062e-23	0.55705	0.274	0.104	5.45408e-19	3	go-cellular-response-to-thyroid-hormone-stimulus
go-interleukin-1-beta-secretion1	8.1462e-23	0.613659	0.777	0.594	6.08114e-19	3	go-interleukin-1-beta-secretion
go-nucleobase-containing-small-molecule-catabolic-process1	9.85398e-23	0.389919	0.646	0.402	7.35599e-19	3	go-nucleobase-containing-small-molecule-catabolic-process
go-fc-receptor-mediated-stimulatory-signaling-pathway1	1.03442e-22	0.28437	1	0.997	7.72194e-19	3	go-fc-receptor-mediated-stimulatory-signaling-pathway
go-cell-cell-adhesion	1.22828e-22	0.263644	1	1	9.1691e-19	3	go-cell-cell-adhesion
go-negative-regulation-of-cell-population-proliferation1	1.24169e-22	0.502125	1	0.981	9.26918e-19	3	go-negative-regulation-of-cell-population-proliferation
go-extrinsic-component-of-membrane1	2.32896e-22	0.50314	1	0.951	1.73857e-18	3	go-extrinsic-component-of-membrane
go-bone-cell-development1	2.62624e-22	0.383993	0.577	0.337	1.96049e-18	3	go-bone-cell-development
go-pentose-phosphate-shunt1	2.88338e-22	0.616239	0.363	0.17	2.15244e-18	3	go-pentose-phosphate-shunt
go-positive-regulation-of-cysteine-type-endopeptidase-activity1	7.67567e-22	0.325426	0.997	0.995	5.72989e-18	3	go-positive-regulation-of-cysteine-type-endopeptidase-activity
go-negative-regulation-of-inflammatory-response1	9.01665e-22	0.549109	0.979	0.887	6.73093e-18	3	go-negative-regulation-of-inflammatory-response
go-negative-regulation-of-defense-response1	1.53318e-21	0.473306	0.991	0.98	1.14452e-17	3	go-negative-regulation-of-defense-response
go-cellular-transition-metal-ion-homeostasis	1.58243e-21	0.34724	1	0.992	1.18129e-17	3	go-cellular-transition-metal-ion-homeostasis
go-oxidoreductase-activity-acting-on-a-sulfur-group-of-donors1	1.66296e-21	0.502328	0.935	0.872	1.2414e-17	3	go-oxidoreductase-activity-acting-on-a-sulfur-group-of-donors
go-lamellipodium1	2.1513e-21	0.293854	1	0.998	1.60595e-17	3	go-lamellipodium
go-positive-regulation-of-mapk-cascade1	2.47258e-21	0.342286	1	1	1.84578e-17	3	go-positive-regulation-of-mapk-cascade
go-cellular-defense-response1	2.76399e-21	0.448512	0.789	0.569	2.06332e-17	3	go-cellular-defense-response
go-extrinsic-component-of-plasma-membrane1	2.98032e-21	0.514316	0.994	0.927	2.22481e-17	3	go-extrinsic-component-of-plasma-membrane
go-receptor-internalization1	3.33986e-21	0.42813	0.905	0.703	2.49321e-17	3	go-receptor-internalization
go-exocytic-process1	6.74197e-21	0.358776	0.842	0.588	5.03288e-17	3	go-exocytic-process
go-regulation-of-growth1	1.17005e-20	0.438387	1	0.978	8.73441e-17	3	go-regulation-of-growth
go-energy-coupled-proton-transmembrane-transport-against-electrochemical-gradient	1.18853e-20	0.305159	0.976	0.986	8.87237e-17	3	go-energy-coupled-proton-transmembrane-transport-against-electrochemical-gradient
go-interleukin-1-secretion1	1.4375e-20	0.556693	0.777	0.594	1.07309e-16	3	go-interleukin-1-secretion
go-regulation-of-transmembrane-transport1	1.53341e-20	0.470143	0.997	0.975	1.14469e-16	3	go-regulation-of-transmembrane-transport
go-metal-ion-transport1	2.27588e-20	0.439626	1	0.995	1.69895e-16	3	go-metal-ion-transport
go-regulation-of-extrinsic-apoptotic-signaling-pathway1	2.44001e-20	0.463669	0.988	0.958	1.82147e-16	3	go-regulation-of-extrinsic-apoptotic-signaling-pathway
go-positive-regulation-of-lymphocyte-migration1	2.49599e-20	0.365558	0.774	0.522	1.86325e-16	3	go-positive-regulation-of-lymphocyte-migration
go-inorganic-ion-transmembrane-transport	2.53285e-20	0.264262	1	1	1.89077e-16	3	go-inorganic-ion-transmembrane-transport
go-response-to-xenobiotic-stimulus1	2.95746e-20	0.461698	0.973	0.821	2.20774e-16	3	go-response-to-xenobiotic-stimulus
go-necrotic-cell-death	3.58821e-20	0.563264	0.973	0.929	2.6786e-16	3	go-necrotic-cell-death
go-positive-regulation-of-calcium-ion-transport1	3.97651e-20	0.530229	0.929	0.807	2.96846e-16	3	go-positive-regulation-of-calcium-ion-transport
go-cellular-response-to-peptide1	3.98427e-20	0.303801	1	0.995	2.97426e-16	3	go-cellular-response-to-peptide
go-ph-reduction1	4.28978e-20	0.607562	0.854	0.742	3.20232e-16	3	go-ph-reduction
go-epithelium-development1	4.37264e-20	0.354392	0.991	0.986	3.26418e-16	3	go-epithelium-development
go-regulation-of-cell-projection-organization1	5.72051e-20	0.429736	0.997	0.987	4.27036e-16	3	go-regulation-of-cell-projection-organization
go-positive-regulation-of-cell-development1	6.17561e-20	0.553519	0.988	0.908	4.61009e-16	3	go-positive-regulation-of-cell-development
go-vascular-endothelial-growth-factor-receptor-signaling-pathway1	1.01459e-19	0.488282	0.976	0.929	7.5739e-16	3	go-vascular-endothelial-growth-factor-receptor-signaling-pathway
go-positive-regulation-of-myeloid-leukocyte-cytokine-production-involved-in-immune-response1	1.34674e-19	0.543149	0.554	0.356	1.00534e-15	3	go-positive-regulation-of-myeloid-leukocyte-cytokine-production-involved-in-immune-response
go-transition-metal-ion-homeostasis	1.53348e-19	0.307119	1	0.999	1.14474e-15	3	go-transition-metal-ion-homeostasis
go-nucleoside-catabolic-process1	1.83235e-19	0.386888	0.461	0.256	1.36785e-15	3	go-nucleoside-catabolic-process
go-regulation-of-ossification	1.8962e-19	0.35338	0.949	0.791	1.41551e-15	3	go-regulation-of-ossification
go-positive-regulation-of-acute-inflammatory-response	1.92375e-19	0.547918	0.568	0.388	1.43608e-15	3	go-positive-regulation-of-acute-inflammatory-response
go-glial-cell-differentiation	2.12368e-19	0.464717	0.979	0.857	1.58533e-15	3	go-glial-cell-differentiation
go-cell-surface	4.6288e-19	0.275145	1	0.999	3.4554e-15	3	go-cell-surface
go-smooth-muscle-cell-proliferation	6.09003e-19	0.602054	0.982	0.893	4.54621e-15	3	go-smooth-muscle-cell-proliferation
go-cell-growth1	9.76838e-19	0.390084	1	0.987	7.2921e-15	3	go-cell-growth
go-negative-regulation-of-release-of-cytochrome-c-from-mitochondria1	1.00767e-18	0.482905	0.393	0.209	7.52227e-15	3	go-negative-regulation-of-release-of-cytochrome-c-from-mitochondria
go-regulation-of-tumor-necrosis-factor-mediated-signaling-pathway1	1.34182e-18	0.511042	0.851	0.679	1.00167e-14	3	go-regulation-of-tumor-necrosis-factor-mediated-signaling-pathway
go-pyrimidine-nucleoside-catabolic-process1	3.02409e-18	0.482101	0.354	0.177	2.25748e-14	3	go-pyrimidine-nucleoside-catabolic-process
go-membrane-lipid-catabolic-process1	3.21526e-18	0.261612	0.357	0.18	2.40019e-14	3	go-membrane-lipid-catabolic-process
go-killing-of-cells-of-other-organism	4.12569e-18	0.637134	0.991	0.95	3.07982e-14	3	go-killing-of-cells-of-other-organism
go-negative-regulation-of-immune-response1	4.20734e-18	0.339221	1	0.991	3.14078e-14	3	go-negative-regulation-of-immune-response
go-response-to-peptide-hormone1	4.21014e-18	0.309517	1	0.993	3.14287e-14	3	go-response-to-peptide-hormone
go-positive-regulation-of-mononuclear-cell-migration1	5.48152e-18	0.403766	0.473	0.274	4.09195e-14	3	go-positive-regulation-of-mononuclear-cell-migration
go-regulation-of-neutrophil-activation1	6.04876e-18	0.527177	0.268	0.115	4.5154e-14	3	go-regulation-of-neutrophil-activation
go-negative-regulation-of-developmental-process1	1.04126e-17	0.450918	1	0.954	7.77299e-14	3	go-negative-regulation-of-developmental-process
go-lipid-binding1	1.10622e-17	0.489573	0.988	0.931	8.2579e-14	3	go-lipid-binding
go-positive-regulation-of-osteoclast-differentiation	1.55029e-17	0.345849	0.443	0.256	1.15729e-13	3	go-positive-regulation-of-osteoclast-differentiation
go-cofactor-catabolic-process1	1.94754e-17	0.295664	0.744	0.54	1.45384e-13	3	go-cofactor-catabolic-process
go-regulation-of-neuron-projection-development1	2.24856e-17	0.427986	0.967	0.826	1.67855e-13	3	go-regulation-of-neuron-projection-development
go-positive-regulation-of-ossification	2.50146e-17	0.355486	0.827	0.645	1.86734e-13	3	go-positive-regulation-of-ossification
go-regulation-of-chemotaxis	2.89581e-17	0.34337	1	0.996	2.16173e-13	3	go-regulation-of-chemotaxis
go-ameboidal-type-cell-migration1	3.88584e-17	0.40528	1	0.989	2.90078e-13	3	go-ameboidal-type-cell-migration
go-fat-cell-differentiation	4.30914e-17	0.471696	0.955	0.875	3.21677e-13	3	go-fat-cell-differentiation
go-regulation-of-cation-transmembrane-transport1	4.59697e-17	0.409534	1	0.978	3.43164e-13	3	go-regulation-of-cation-transmembrane-transport
go-regulation-of-cell-morphogenesis1	4.90733e-17	0.389392	0.997	0.974	3.66332e-13	3	go-regulation-of-cell-morphogenesis
go-low-density-lipoprotein-particle-clearance1	7.9127e-17	0.483939	0.801	0.642	5.90683e-13	3	go-low-density-lipoprotein-particle-clearance
go-vacuolar-acidification1	8.96302e-17	0.552628	0.506	0.319	6.6909e-13	3	go-vacuolar-acidification
go-positive-regulation-of-protein-localization-to-cell-surface	9.44534e-17	0.49748	0.449	0.266	7.05095e-13	3	go-positive-regulation-of-protein-localization-to-cell-surface
go-cadherin-binding-involved-in-cell-cell-adhesion1	1.14599e-16	0.503009	0.604	0.448	8.55478e-13	3	go-cadherin-binding-involved-in-cell-cell-adhesion
go-phagosome-maturation1	1.16544e-16	0.551273	0.848	0.782	8.70003e-13	3	go-phagosome-maturation
go-negative-regulation-of-protein-serine-threonine-kinase-activity1	1.49351e-16	0.491375	0.982	0.919	1.11491e-12	3	go-negative-regulation-of-protein-serine-threonine-kinase-activity
go-response-to-progesterone	1.49719e-16	0.47007	0.887	0.752	1.11765e-12	3	go-response-to-progesterone
go-transition-metal-ion-binding1	1.83751e-16	0.397037	1	0.992	1.3717e-12	3	go-transition-metal-ion-binding
go-glutathione-derivative-biosynthetic-process1	1.97437e-16	0.482857	0.461	0.28	1.47386e-12	3	go-glutathione-derivative-biosynthetic-process
go-positive-regulation-of-t-cell-migration1	2.3784e-16	0.353961	0.688	0.476	1.77548e-12	3	go-positive-regulation-of-t-cell-migration
go-regulation-of-leukocyte-chemotaxis	2.75255e-16	0.33334	0.991	0.989	2.05478e-12	3	go-regulation-of-leukocyte-chemotaxis
go-regulation-of-mapk-cascade1	2.86422e-16	0.256879	1	0.999	2.13814e-12	3	go-regulation-of-mapk-cascade
go-mammary-gland-epithelial-cell-proliferation1	3.46991e-16	0.466259	0.56	0.376	2.59029e-12	3	go-mammary-gland-epithelial-cell-proliferation
go-specific-granule-membrane1	3.5564e-16	0.426077	0.964	0.935	2.65485e-12	3	go-specific-granule-membrane
go-negative-regulation-of-cell-development	4.78861e-16	0.369846	0.982	0.806	3.5747e-12	3	go-negative-regulation-of-cell-development
go-negative-regulation-of-nervous-system-development1	4.97483e-16	0.332536	0.973	0.816	3.71371e-12	3	go-negative-regulation-of-nervous-system-development
go-zymogen-activation1	5.46788e-16	0.34335	0.723	0.532	4.08177e-12	3	go-zymogen-activation
go-positive-regulation-of-phagocytosis1	6.70965e-16	0.438953	0.943	0.881	5.00876e-12	3	go-positive-regulation-of-phagocytosis
go-ruffle-organization1	6.84666e-16	0.459078	0.929	0.843	5.11103e-12	3	go-ruffle-organization
go-negative-regulation-of-cytokine-biosynthetic-process1	9.73348e-16	0.507927	0.592	0.431	7.26605e-12	3	go-negative-regulation-of-cytokine-biosynthetic-process
go-regulation-of-defense-response-to-virus-by-virus	1.0088e-15	0.352979	0.92	0.87	7.5307e-12	3	go-regulation-of-defense-response-to-virus-by-virus
go-positive-regulation-of-cytokine-production-involved-in-immune-response	1.84709e-15	0.341396	0.97	0.964	1.37885e-11	3	go-positive-regulation-of-cytokine-production-involved-in-immune-response
go-positive-regulation-of-transporter-activity1	2.66152e-15	0.509777	0.973	0.93	1.98683e-11	3	go-positive-regulation-of-transporter-activity
go-positive-regulation-of-exocytosis1	3.1057e-15	0.460783	0.92	0.788	2.3184e-11	3	go-positive-regulation-of-exocytosis
go-multicellular-organismal-homeostasis1	6.35437e-15	0.485239	1	0.975	4.74353e-11	3	go-multicellular-organismal-homeostasis
go-positive-regulation-of-cell-growth1	6.36975e-15	0.483413	0.997	0.95	4.75502e-11	3	go-positive-regulation-of-cell-growth
go-transporter-activity1	6.42399e-15	0.552099	0.991	0.959	4.79551e-11	3	go-transporter-activity
go-negative-regulation-of-response-to-drug	7.55518e-15	0.383407	0.521	0.352	5.63994e-11	3	go-negative-regulation-of-response-to-drug
go-regulation-of-regulated-secretory-pathway1	7.57848e-15	0.458373	0.952	0.889	5.65733e-11	3	go-regulation-of-regulated-secretory-pathway
go-negative-regulation-of-interleukin-1-production1	7.83429e-15	0.316126	0.354	0.196	5.8483e-11	3	go-negative-regulation-of-interleukin-1-production
go-negative-regulation-of-peptide-secretion1	9.50552e-15	0.419035	0.997	0.989	7.09587e-11	3	go-negative-regulation-of-peptide-secretion
[truncated: 2,734 more rows]

## Sheet: table s2-3 pathway-based_FC-DEF
	p_val	avg_log2FC	pct.1	pct.2	p_val_adj	cluster	gene
reactome-degradation-of-beta-catenin-by-the-destruction-complex	5.29273e-59	0.272324	1	0.996	6.46243e-56	0	reactome-degradation-of-beta-catenin-by-the-destruction-complex
reactome-mapk-family-signaling-cascades	2.87886e-56	0.250636	1	0.999	3.51509e-53	0	reactome-mapk-family-signaling-cascades
reactome-g2-m-checkpoints	1.06968e-54	0.322626	1	0.998	1.30608e-51	0	reactome-g2-m-checkpoints
reactome-cell-cycle-checkpoints	2.93299e-54	0.301097	1	0.999	3.58118e-51	0	reactome-cell-cycle-checkpoints
reactome-cyclin-a:cdk2-associated-events-at-s-phase-entry	6.49707e-47	0.253951	1	0.995	7.93292e-44	0	reactome-cyclin-a:cdk2-associated-events-at-s-phase-entry
reactome-abc-family-proteins-mediated-transport	3.00547e-43	0.255958	1	0.994	3.66968e-40	0	reactome-abc-family-proteins-mediated-transport
reactome-mitotic-g1-g1-s-phases	5.37463e-43	0.264026	1	0.997	6.56242e-40	0	reactome-mitotic-g1-g1-s-phases
reactome-neddylation	8.02437e-38	0.271855	1	0.998	9.79775e-35	0	reactome-neddylation
reactome-regulation-of-fzd-by-ubiquitination	1.40403e-34	0.442673	1	0.889	1.71432e-31	0	reactome-regulation-of-fzd-by-ubiquitination
reactome-translesion-synthesis-by-polh	1.88569e-29	0.271037	1	0.924	2.30243e-26	0	reactome-translesion-synthesis-by-polh
reactome-interleukin-7-signaling	1.66487e-28	0.328545	0.393	0.19	2.03281e-25	0	reactome-interleukin-7-signaling
reactome-jnk-c-jun-kinases-phosphorylation-and-activation-mediated-by-activated-human-tak1	1.40029e-27	0.35599	1	0.912	1.70976e-24	0	reactome-jnk-c-jun-kinases-phosphorylation-and-activation-mediated-by-activated-human-tak1
reactome-regulation-of-tp53-activity-through-methylation	1.48746e-27	0.290696	1	0.905	1.81618e-24	0	reactome-regulation-of-tp53-activity-through-methylation
reactome-attenuation-phase	3.41561e-27	0.429342	0.933	0.75	4.17046e-24	0	reactome-attenuation-phase
reactome-disorders-of-transmembrane-transporters	6.20137e-27	0.276015	1	0.996	7.57188e-24	0	reactome-disorders-of-transmembrane-transporters
reactome-glycogen-metabolism	3.16754e-25	0.268204	1	0.948	3.86757e-22	0	reactome-glycogen-metabolism
reactome-regulation-of-tp53-expression-and-degradation	4.35988e-24	0.338945	1	0.945	5.32342e-21	0	reactome-regulation-of-tp53-expression-and-degradation
reactome-er-quality-control-compartment-erqc	2.14486e-22	0.278545	1	0.929	2.61887e-19	0	reactome-er-quality-control-compartment-erqc
reactome-calnexin-calreticulin-cycle	2.39702e-22	0.261472	1	0.955	2.92676e-19	0	reactome-calnexin-calreticulin-cycle
reactome-hsf1-dependent-transactivation	1.1086e-21	0.409402	0.942	0.763	1.3536e-18	0	reactome-hsf1-dependent-transactivation
reactome-regulation-of-tnfr1-signaling	3.18333e-21	0.311771	1	0.944	3.88685e-18	0	reactome-regulation-of-tnfr1-signaling
reactome-tnfr1-induced-nfkappab-signaling-pathway	4.37267e-20	0.297647	1	0.937	5.33904e-17	0	reactome-tnfr1-induced-nfkappab-signaling-pathway
reactome-deactivation-of-the-beta-catenin-transactivating-complex	9.63985e-19	0.341615	1	0.947	1.17703e-15	0	reactome-deactivation-of-the-beta-catenin-transactivating-complex
reactome-negative-regulation-of-fgfr3-signaling	1.31087e-18	0.347451	1	0.926	1.60058e-15	0	reactome-negative-regulation-of-fgfr3-signaling
reactome-tnf-signaling	3.2931e-18	0.345277	1	0.946	4.02087e-15	0	reactome-tnf-signaling
reactome-cross-presentation-of-soluble-exogenous-antigens-endosomes	7.46721e-18	0.263144	1	0.949	9.11746e-15	0	reactome-cross-presentation-of-soluble-exogenous-antigens-endosomes
reactome-negative-regulation-of-fgfr4-signaling	5.00626e-17	0.345413	1	0.926	6.11264e-14	0	reactome-negative-regulation-of-fgfr4-signaling
reactome-hsf1-activation	2.91163e-16	0.294508	0.975	0.87	3.5551e-13	0	reactome-hsf1-activation
reactome-notch1-intracellular-domain-regulates-transcription	6.61974e-15	0.267531	1	0.971	8.08271e-12	0	reactome-notch1-intracellular-domain-regulates-transcription
reactome-notch2-activation-and-transmission-of-signal-to-the-nucleus	1.54969e-14	0.272119	1	0.918	1.89217e-11	0	reactome-notch2-activation-and-transmission-of-signal-to-the-nucleus
reactome-cellular-response-to-heat-stress	1.56605e-14	0.317967	0.998	0.974	1.91214e-11	0	reactome-cellular-response-to-heat-stress
reactome-negative-regulation-of-fgfr1-signaling	1.71409e-14	0.337373	1	0.926	2.09291e-11	0	reactome-negative-regulation-of-fgfr1-signaling
reactome-activated-tak1-mediates-p38-mapk-activation	2.57263e-14	0.267658	1	0.924	3.14118e-11	0	reactome-activated-tak1-mediates-p38-mapk-activation
reactome-early-phase-of-hiv-life-cycle	3.29574e-14	0.410459	0.637	0.473	4.02409e-11	0	reactome-early-phase-of-hiv-life-cycle
reactome-fanconi-anemia-pathway	3.75896e-14	0.394477	1	0.925	4.58968e-11	0	reactome-fanconi-anemia-pathway
reactome-uptake-and-actions-of-bacterial-toxins	7.54204e-13	0.296088	0.869	0.718	9.20883e-10	0	reactome-uptake-and-actions-of-bacterial-toxins
reactome-negative-regulation-of-fgfr2-signaling	1.19396e-12	0.322819	1	0.926	1.45783e-09	0	reactome-negative-regulation-of-fgfr2-signaling
reactome-signaling-by-notch1-in-cancer	1.75706e-12	0.278396	1	0.974	2.14536e-09	0	reactome-signaling-by-notch1-in-cancer
reactome-regulation-of-tp53-activity	2.29002e-12	0.456103	0.999	0.98	2.79611e-09	0	reactome-regulation-of-tp53-activity
reactome-processing-of-dna-double-strand-break-ends	3.13101e-12	0.482487	1	0.977	3.82297e-09	0	reactome-processing-of-dna-double-strand-break-ends
reactome-raf-activation	3.57136e-12	0.293706	0.662	0.506	4.36063e-09	0	reactome-raf-activation
reactome-regulation-of-hsf1-mediated-heat-shock-response	1.35141e-10	0.441288	0.987	0.882	1.65007e-07	0	reactome-regulation-of-hsf1-mediated-heat-shock-response
reactome-chaperone-mediated-autophagy	1.87642e-10	0.280194	0.777	0.62	2.29111e-07	0	reactome-chaperone-mediated-autophagy
reactome-integration-of-provirus	4.31728e-10	0.430264	0.354	0.244	5.27139e-07	0	reactome-integration-of-provirus
reactome-metalloprotease-dubs	5.03661e-10	0.348397	1	0.917	6.1497e-07	0	reactome-metalloprotease-dubs
reactome-signaling-by-fgfr4	6.8424e-09	0.315792	1	0.936	8.35457e-06	0	reactome-signaling-by-fgfr4
reactome-signaling-by-fgfr3	2.00264e-08	0.290676	1	0.936	2.44522e-05	0	reactome-signaling-by-fgfr3
reactome-transcriptional-regulation-by-the-ap-2-tfap2-family-of-transcription-factors	2.21719e-08	0.274374	0.569	0.46	2.70719e-05	0	reactome-transcriptional-regulation-by-the-ap-2-tfap2-family-of-transcription-factors
reactome-regulation-of-mecp2-expression-and-activity	2.5679e-08	0.304775	0.446	0.342	3.13541e-05	0	reactome-regulation-of-mecp2-expression-and-activity
reactome-regulation-of-tp53-activity-through-phosphorylation	3.70412e-08	0.379759	1	0.976	4.52273e-05	0	reactome-regulation-of-tp53-activity-through-phosphorylation
reactome-metabolism-of-nitric-oxide:-enos-activation-and-regulation	1.20112e-07	0.353498	0.392	0.287	0.000146656	0	reactome-metabolism-of-nitric-oxide:-enos-activation-and-regulation
reactome-processing-and-activation-of-sumo	6.77031e-07	0.430672	0.26	0.19	0.000826654	0	reactome-processing-and-activation-of-sumo
reactome-signaling-by-egfr	9.9433e-07	0.253983	1	0.958	0.00121408	0	reactome-signaling-by-egfr
reactome-sumoylation-of-rna-binding-proteins	1.36278e-05	0.279448	0.786	0.669	0.0166396	0	reactome-sumoylation-of-rna-binding-proteins
reactome-dna-double-strand-break-response	2.26581e-05	0.436996	1	0.961	0.0276655	0	reactome-dna-double-strand-break-response
reactome-sumoylation-of-sumoylation-proteins	8.10351e-05	0.260986	0.514	0.435	0.0989439	0	reactome-sumoylation-of-sumoylation-proteins
reactome-signaling-by-fgfr1	0.000195632	0.334055	1	0.936	0.238867	0	reactome-signaling-by-fgfr1
reactome-sumoylation-of-intracellular-receptors	0.000430527	0.315118	0.424	0.375	0.525673	0	reactome-sumoylation-of-intracellular-receptors
reactome-dna-double-strand-break-repair	0.000664118	0.371071	1	0.98	0.810888	0	reactome-dna-double-strand-break-repair
reactome-regulation-of-ifng-signaling	0.00183716	0.301775	0.284	0.235	1	0	reactome-regulation-of-ifng-signaling
reactome-sumoylation	0.00203875	0.30955	0.988	0.969	1	0	reactome-sumoylation
reactome-sumoylation-of-chromatin-organization-proteins	0.002707	0.344119	0.742	0.643	1	0	reactome-sumoylation-of-chromatin-organization-proteins
reactome-regulation-of-tlr-by-endogenous-ligand	2.14171e-238	1.68063	0.717	0.071	2.61503e-235	1	reactome-regulation-of-tlr-by-endogenous-ligand
reactome-innate-immune-system	8.60109e-230	0.803663	1	1	1.05019e-226	1	reactome-innate-immune-system
reactome-neutrophil-degranulation	1.36633e-229	1.01925	1	1	1.66829e-226	1	reactome-neutrophil-degranulation
reactome-trafficking-and-processing-of-endosomal-tlr	1.64585e-181	1.66685	0.598	0.067	2.00958e-178	1	reactome-trafficking-and-processing-of-endosomal-tlr
reactome-rho-gtpases-activate-nadph-oxidases	6.56396e-165	1.49147	0.991	0.604	8.01459e-162	1	reactome-rho-gtpases-activate-nadph-oxidases
reactome-cross-presentation-of-particulate-exogenous-antigens-phagosomes	2.92592e-157	1.79038	0.505	0.051	3.57255e-154	1	reactome-cross-presentation-of-particulate-exogenous-antigens-phagosomes
reactome-mhc-class-ii-antigen-presentation	2.19433e-150	1.06877	1	0.979	2.67928e-147	1	reactome-mhc-class-ii-antigen-presentation
reactome-dissolution-of-fibrin-clot	7.51159e-146	1.29806	0.537	0.07	9.17165e-143	1	reactome-dissolution-of-fibrin-clot
reactome-diseases-of-immune-system	1.29085e-144	1.10677	0.553	0.081	1.57613e-141	1	reactome-diseases-of-immune-system
reactome-wnt5a-dependent-internalization-of-fzd4	1.82831e-131	1.39029	0.68	0.161	2.23236e-128	1	reactome-wnt5a-dependent-internalization-of-fzd4
reactome-detoxification-of-reactive-oxygen-species	1.22142e-124	0.956457	0.998	0.871	1.49135e-121	1	reactome-detoxification-of-reactive-oxygen-species
reactome-platelet-activation-signaling-and-aggregation	1.40971e-120	0.568744	1	1	1.72126e-117	1	reactome-platelet-activation-signaling-and-aggregation
reactome-ldl-clearance	1.08943e-116	1.21239	0.705	0.195	1.33019e-113	1	reactome-ldl-clearance
reactome-wnt5a-dependent-internalization-of-fzd2-fzd5-and-ror2	3.50648e-116	1.24679	0.48	0.075	4.28141e-113	1	reactome-wnt5a-dependent-internalization-of-fzd2-fzd5-and-ror2
reactome-nucleobase-catabolism	4.53221e-116	1.2211	0.822	0.27	5.53383e-113	1	reactome-nucleobase-catabolism
reactome-dectin-2-family	1.14582e-115	0.378083	0.324	0.022	1.39905e-112	1	reactome-dectin-2-family
reactome-hemostasis	2.83157e-111	0.525408	1	1	3.45735e-108	1	reactome-hemostasis
reactome-toll-like-receptor-cascades	1.69373e-109	0.558806	1	1	2.06804e-106	1	reactome-toll-like-receptor-cascades
reactome-adaptive-immune-system	3.32559e-106	0.39865	1	1	4.06054e-103	1	reactome-adaptive-immune-system
reactome-pentose-phosphate-pathway	7.66951e-102	1.10021	0.457	0.08	9.36447e-99	1	reactome-pentose-phosphate-pathway
reactome-nucleotide-salvage	2.64709e-100	1.22765	0.801	0.304	3.2321e-97	1	reactome-nucleotide-salvage
reactome-cytokine-signaling-in-immune-system	3.10051e-100	0.30931	1	1	3.78572e-97	1	reactome-cytokine-signaling-in-immune-system
reactome-signal-regulatory-protein-family-interactions	3.62981e-96	0.972313	0.495	0.101	4.43199e-93	1	reactome-signal-regulatory-protein-family-interactions
reactome-cellular-responses-to-external-stimuli	6.22817e-96	0.361326	1	1	7.60459e-93	1	reactome-cellular-responses-to-external-stimuli
reactome-ros-and-rns-production-in-phagocytes	1.48437e-95	0.954171	0.988	0.837	1.81241e-92	1	reactome-ros-and-rns-production-in-phagocytes
reactome-c-type-lectin-receptors-clrs	2.22839e-94	0.411356	1	1	2.72086e-91	1	reactome-c-type-lectin-receptors-clrs
reactome-response-to-elevated-platelet-cytosolic-ca2plus	8.49691e-91	0.484236	1	0.998	1.03747e-87	1	reactome-response-to-elevated-platelet-cytosolic-ca2plus
reactome-antigen-processing-cross-presentation	1.90621e-89	0.284874	1	1	2.32748e-86	1	reactome-antigen-processing-cross-presentation
reactome-interleukin-10-signaling	3.69564e-89	1.13438	0.783	0.289	4.51238e-86	1	reactome-interleukin-10-signaling
reactome-pcp-ce-pathway	8.2828e-88	0.348868	1	1	1.01133e-84	1	reactome-pcp-ce-pathway
reactome-plasma-lipoprotein-clearance	5.36614e-85	0.859256	0.804	0.303	6.55206e-82	1	reactome-plasma-lipoprotein-clearance
reactome-pyrimidine-salvage	8.33445e-83	1.08416	0.272	0.026	1.01764e-79	1	reactome-pyrimidine-salvage
reactome-tp53-regulates-transcription-of-genes-involved-in-cytochrome-c-release	2.82048e-82	0.852934	0.582	0.164	3.44381e-79	1	reactome-tp53-regulates-transcription-of-genes-involved-in-cytochrome-c-release
reactome-retrograde-neurotrophin-signalling	7.5992e-81	0.877195	0.379	0.066	9.27862e-78	1	reactome-retrograde-neurotrophin-signalling
reactome-glycosphingolipid-metabolism	3.35403e-80	0.43588	0.644	0.189	4.09527e-77	1	reactome-glycosphingolipid-metabolism
reactome-rho-gtpases-activate-ktn1	5.84775e-78	1.01528	0.762	0.283	7.1401e-75	1	reactome-rho-gtpases-activate-ktn1
reactome-eph-ephrin-mediated-repulsion-of-cells	9.50373e-78	1.17934	0.982	0.829	1.16041e-74	1	reactome-eph-ephrin-mediated-repulsion-of-cells
reactome-lysosome-vesicle-biogenesis	4.40878e-75	0.970756	0.947	0.746	5.38312e-72	1	reactome-lysosome-vesicle-biogenesis
reactome-glutathione-conjugation	2.18072e-74	0.971434	0.735	0.284	2.66266e-71	1	reactome-glutathione-conjugation
reactome-tp53-regulates-transcription-of-cell-death-genes	1.21384e-70	1.14226	0.838	0.386	1.4821e-67	1	reactome-tp53-regulates-transcription-of-cell-death-genes
reactome-interferon-signaling	1.62009e-70	0.355833	1	1	1.97813e-67	1	reactome-interferon-signaling
reactome-vldlr-internalisation-and-degradation	2.45674e-70	1.00821	0.447	0.109	2.99968e-67	1	reactome-vldlr-internalisation-and-degradation
reactome-advanced-glycosylation-endproduct-receptor-signaling	4.10367e-69	0.999841	0.571	0.186	5.01058e-66	1	reactome-advanced-glycosylation-endproduct-receptor-signaling
reactome-gpvi-mediated-activation-cascade	2.68336e-68	0.82582	0.973	0.763	3.27638e-65	1	reactome-gpvi-mediated-activation-cascade
reactome-fcgamma-receptor-fcgr-dependent-phagocytosis	5.22567e-66	0.458251	1	0.998	6.38054e-63	1	reactome-fcgamma-receptor-fcgr-dependent-phagocytosis
reactome-metabolism-of-nucleotides	6.01017e-66	0.997583	1	0.912	7.33842e-63	1	reactome-metabolism-of-nucleotides
reactome-metabolism-of-carbohydrates	1.24322e-65	0.693593	1	0.997	1.51798e-62	1	reactome-metabolism-of-carbohydrates
reactome-nef-mediated-downregulation-of-mhc-class-i-complex-cell-surface-expression	1.75286e-65	0.878966	0.801	0.302	2.14024e-62	1	reactome-nef-mediated-downregulation-of-mhc-class-i-complex-cell-surface-expression
reactome-insulin-receptor-recycling	2.08856e-65	0.970658	0.845	0.438	2.55013e-62	1	reactome-insulin-receptor-recycling
reactome-rho-gtpase-effectors	1.13223e-64	0.281778	1	1	1.38246e-61	1	reactome-rho-gtpase-effectors
reactome-metabolism-of-porphyrins	3.62542e-64	0.566994	0.278	0.043	4.42664e-61	1	reactome-metabolism-of-porphyrins
reactome-signal-transduction-by-l1	1.40045e-63	0.50436	0.379	0.086	1.70995e-60	1	reactome-signal-transduction-by-l1
reactome-signaling-by-ntrks	9.59099e-63	1.29419	0.982	0.854	1.17106e-59	1	reactome-signaling-by-ntrks
reactome-transferrin-endocytosis-and-recycling	2.52905e-62	0.987846	0.843	0.455	3.08796e-59	1	reactome-transferrin-endocytosis-and-recycling
reactome-semaphorin-interactions	8.82478e-62	0.639361	1	0.954	1.07751e-58	1	reactome-semaphorin-interactions
reactome-signaling-by-receptor-tyrosine-kinases	1.0081e-61	0.364183	1	0.999	1.23089e-58	1	reactome-signaling-by-receptor-tyrosine-kinases
reactome-interleukin-1-family-signaling	4.22051e-61	0.340308	1	1	5.15325e-58	1	reactome-interleukin-1-family-signaling
reactome-eph-ephrin-signaling	3.3564e-60	0.313638	1	0.997	4.09816e-57	1	reactome-eph-ephrin-signaling
reactome-metabolism-of-polyamines	1.14571e-58	0.4224	1	0.984	1.39891e-55	1	reactome-metabolism-of-polyamines
reactome-cellular-responses-to-stress	3.04445e-57	0.273784	1	1	3.71728e-54	1	reactome-cellular-responses-to-stress
reactome-sema4d-in-semaphorin-signaling	8.11478e-57	0.832857	0.929	0.622	9.90815e-54	1	reactome-sema4d-in-semaphorin-signaling
reactome-class-i-mhc-mediated-antigen-processing-presentation	1.88496e-55	0.278569	1	1	2.30154e-52	1	reactome-class-i-mhc-mediated-antigen-processing-presentation
reactome-interleukin-1-signaling	6.65138e-55	0.305262	1	1	8.12134e-52	1	reactome-interleukin-1-signaling
reactome-energy-dependent-regulation-of-mtor-by-lkb1-ampk	3.79161e-54	0.719836	0.665	0.276	4.62955e-51	1	reactome-energy-dependent-regulation-of-mtor-by-lkb1-ampk
reactome-cargo-concentration-in-the-er	1.00297e-53	0.715396	0.642	0.262	1.22463e-50	1	reactome-cargo-concentration-in-the-er
reactome-regulation-of-insulin-like-growth-factor-igf-transport-and-uptake-by-insulin-like-growth-factor-binding-proteins-igfbps	1.24651e-53	0.734032	0.938	0.445	1.52199e-50	1	reactome-regulation-of-insulin-like-growth-factor-igf-transport-and-uptake-by-insulin-like-growth-factor-binding-proteins-igfbps
reactome-signaling-by-rho-gtpases	1.37167e-53	0.270393	1	1	1.67481e-50	1	reactome-signaling-by-rho-gtpases
reactome-interferon-gamma-signaling	1.17536e-52	0.364412	1	1	1.43511e-49	1	reactome-interferon-gamma-signaling
reactome-beta-catenin-independent-wnt-signaling	7.65325e-52	0.268879	1	1	9.34462e-49	1	reactome-beta-catenin-independent-wnt-signaling
reactome-respiratory-electron-transport	8.94802e-52	0.271476	1	1	1.09255e-48	1	reactome-respiratory-electron-transport
reactome-the-citric-acid-tca-cycle-and-respiratory-electron-transport	7.43715e-51	0.266488	1	1	9.08076e-48	1	reactome-the-citric-acid-tca-cycle-and-respiratory-electron-transport
reactome-vesicle-mediated-transport	3.87701e-50	0.309564	1	1	4.73383e-47	1	reactome-vesicle-mediated-transport
reactome-clec7a-dectin-1-signaling	3.70624e-49	0.280019	1	0.999	4.52532e-46	1	reactome-clec7a-dectin-1-signaling
reactome-basigin-interactions	8.79154e-49	0.531721	0.52	0.186	1.07345e-45	1	reactome-basigin-interactions
reactome-cross-presentation-of-soluble-exogenous-antigens-endosomes1	8.03681e-48	0.460878	0.998	0.957	9.81295e-45	1	reactome-cross-presentation-of-soluble-exogenous-antigens-endosomes
reactome-rho-gtpases-activate-wasps-and-waves	1.1041e-47	0.302186	1	0.986	1.3481e-44	1	reactome-rho-gtpases-activate-wasps-and-waves
reactome-post-translational-protein-modification	1.14206e-47	0.328489	1	1	1.39446e-44	1	reactome-post-translational-protein-modification
reactome-mtorc1-mediated-signalling	4.82174e-47	0.694381	0.94	0.702	5.88735e-44	1	reactome-mtorc1-mediated-signalling
reactome-synthesis-secretion-and-deacylation-of-ghrelin	1.07757e-45	0.478519	0.368	0.108	1.31571e-42	1	reactome-synthesis-secretion-and-deacylation-of-ghrelin
reactome-ephrin-signaling	2.34161e-45	0.588391	0.546	0.214	2.8591e-42	1	reactome-ephrin-signaling
reactome-trans-golgi-network-vesicle-budding	5.09003e-45	0.438437	0.998	0.99	6.21492e-42	1	reactome-trans-golgi-network-vesicle-budding
reactome-g-protein-beta:gamma-signalling	5.6621e-45	0.699702	0.676	0.308	6.91342e-42	1	reactome-g-protein-beta:gamma-signalling
reactome-rho-gtpases-activate-cit	6.27244e-45	0.639364	0.932	0.638	7.65865e-42	1	reactome-rho-gtpases-activate-cit
reactome-the-nlrp3-inflammasome	7.79069e-44	0.689098	0.786	0.414	9.51243e-41	1	reactome-the-nlrp3-inflammasome
reactome-signaling-by-ntrk1-trka	3.52011e-43	1.13974	0.95	0.789	4.29805e-40	1	reactome-signaling-by-ntrk1-trka
reactome-met-activates-rap1-and-rac1	6.68588e-43	0.772406	0.347	0.099	8.16346e-40	1	reactome-met-activates-rap1-and-rac1
reactome-transcriptional-regulation-by-runx2	7.05671e-43	0.298345	1	0.996	8.61624e-40	1	reactome-transcriptional-regulation-by-runx2
reactome-fceri-mediated-nf-kb-activation	7.40859e-43	0.285587	1	0.999	9.04589e-40	1	reactome-fceri-mediated-nf-kb-activation
reactome-signaling-by-erythropoietin	4.00573e-42	0.295923	0.29	0.073	4.89099e-39	1	reactome-signaling-by-erythropoietin
reactome-macroautophagy	6.13915e-42	0.327541	1	0.997	7.4959e-39	1	reactome-macroautophagy
reactome-purine-catabolism	2.32256e-41	0.538221	0.317	0.089	2.83585e-38	1	reactome-purine-catabolism
reactome-er-to-golgi-anterograde-transport	6.39423e-41	0.636653	0.996	0.967	7.80735e-38	1	reactome-er-to-golgi-anterograde-transport
reactome-complex-i-biogenesis	1.87777e-40	0.326162	1	0.995	2.29276e-37	1	reactome-complex-i-biogenesis
reactome-glucose-metabolism	7.73164e-40	0.723149	0.993	0.929	9.44033e-37	1	reactome-glucose-metabolism
reactome-signaling-by-vegf	1.07492e-38	0.469011	1	0.993	1.31248e-35	1	reactome-signaling-by-vegf
reactome-inflammasomes	1.5544e-38	0.69765	0.819	0.467	1.89792e-35	1	reactome-inflammasomes
reactome-programmed-cell-death	3.24249e-38	0.263521	1	1	3.95908e-35	1	reactome-programmed-cell-death
reactome-traf6-mediated-nf-kb-activation	1.11183e-37	0.513191	0.482	0.193	1.35754e-34	1	reactome-traf6-mediated-nf-kb-activation
reactome-hedgehog-on-state	3.97561e-37	0.261964	1	0.995	4.85422e-34	1	reactome-hedgehog-on-state
reactome-transport-of-small-molecules	1.38545e-36	0.33897	1	1	1.69164e-33	1	reactome-transport-of-small-molecules
reactome-arachidonic-acid-metabolism	1.44843e-36	0.305875	0.779	0.362	1.76854e-33	1	reactome-arachidonic-acid-metabolism
reactome-mtor-signalling	2.17209e-36	0.750353	0.959	0.774	2.65213e-33	1	reactome-mtor-signalling
reactome-glycolysis	2.73669e-36	0.688003	0.988	0.902	3.34149e-33	1	reactome-glycolysis
reactome-methylation	9.69991e-35	0.477443	0.27	0.076	1.18436e-31	1	reactome-methylation
reactome-disorders-of-transmembrane-transporters1	1.16143e-34	0.319335	1	0.996	1.4181e-31	1	reactome-disorders-of-transmembrane-transporters
reactome-signalling-to-erks	1.51822e-34	0.416193	0.548	0.237	1.85375e-31	1	reactome-signalling-to-erks
reactome-nrage-signals-death-through-jnk	4.92582e-34	0.255297	0.53	0.222	6.01442e-31	1	reactome-nrage-signals-death-through-jnk
reactome-rho-gtpases-activate-pkns	9.14925e-34	0.541456	0.996	0.966	1.11712e-30	1	reactome-rho-gtpases-activate-pkns
reactome-asparagine-n-linked-glycosylation	3.22437e-33	0.386753	1	0.998	3.93695e-30	1	reactome-asparagine-n-linked-glycosylation
reactome-g-alpha-z-signalling-events	6.95334e-33	0.290911	0.694	0.323	8.49003e-30	1	reactome-g-alpha-z-signalling-events
reactome-ptk6-regulates-rho-gtpases-ras-gtpase-and-map-kinases	1.04618e-32	0.42863	0.285	0.087	1.27738e-29	1	reactome-ptk6-regulates-rho-gtpases-ras-gtpase-and-map-kinases
reactome-plasma-lipoprotein-assembly-remodeling-and-clearance	1.99399e-32	0.479355	0.858	0.436	2.43467e-29	1	reactome-plasma-lipoprotein-assembly-remodeling-and-clearance
reactome-transport-to-the-golgi-and-subsequent-modification	2.61222e-32	0.605264	0.996	0.962	3.18952e-29	1	reactome-transport-to-the-golgi-and-subsequent-modification
reactome-the-role-of-nef-in-hiv-1-replication-and-disease-pathogenesis	3.03147e-31	0.343045	0.996	0.947	3.70143e-28	1	reactome-the-role-of-nef-in-hiv-1-replication-and-disease-pathogenesis
reactome-p75-ntr-receptor-mediated-signalling	4.27208e-31	0.496033	1	0.99	5.21621e-28	1	reactome-p75-ntr-receptor-mediated-signalling
reactome-cd209-dc-sign-signaling	1.50197e-30	0.515868	0.45	0.193	1.83391e-27	1	reactome-cd209-dc-sign-signaling
reactome-rab-geranylgeranylation	4.04576e-30	0.913932	0.826	0.52	4.93987e-27	1	reactome-rab-geranylgeranylation
reactome-regulation-of-actin-dynamics-for-phagocytic-cup-formation	5.54547e-30	0.281474	1	0.997	6.77102e-27	1	reactome-regulation-of-actin-dynamics-for-phagocytic-cup-formation
reactome-copii-mediated-vesicle-transport	5.58155e-30	0.970453	0.923	0.725	6.81508e-27	1	reactome-copii-mediated-vesicle-transport
reactome-g-beta:gamma-signalling-through-cdc42	8.16776e-30	0.274326	0.356	0.13	9.97283e-27	1	reactome-g-beta:gamma-signalling-through-cdc42
reactome-gluconeogenesis	1.93547e-29	0.535357	0.956	0.791	2.36321e-26	1	reactome-gluconeogenesis
reactome-nef-mediated-cd4-down-regulation	3.61547e-29	0.664034	0.495	0.215	4.41449e-26	1	reactome-nef-mediated-cd4-down-regulation
reactome-citric-acid-cycle-tca-cycle	2.60731e-28	0.78395	0.625	0.374	3.18353e-25	1	reactome-citric-acid-cycle-tca-cycle
reactome-metabolism-of-lipids	2.73033e-28	1.1684	0.97	0.85	3.33373e-25	1	reactome-metabolism-of-lipids
reactome-atf4-activates-genes-in-response-to-endoplasmic-reticulum-stress	4.47696e-27	0.438911	0.383	0.16	5.46637e-24	1	reactome-atf4-activates-genes-in-response-to-endoplasmic-reticulum-stress
reactome-host-interactions-with-influenza-factors	2.03919e-26	0.709095	0.867	0.571	2.48986e-23	1	reactome-host-interactions-with-influenza-factors
reactome-integrin-signaling	1.2201e-25	0.484268	0.52	0.26	1.48974e-22	1	reactome-integrin-signaling
reactome-sema4d-induced-cell-migration-and-growth-cone-collapse	2.396e-25	0.512775	0.813	0.531	2.92551e-22	1	reactome-sema4d-induced-cell-migration-and-growth-cone-collapse
reactome-rab-regulation-of-trafficking	2.95759e-25	0.738576	0.98	0.934	3.61122e-22	1	reactome-rab-regulation-of-trafficking
reactome-sema3a-pak-dependent-axon-repulsion	8.15795e-24	0.420586	0.799	0.5	9.96086e-21	1	reactome-sema3a-pak-dependent-axon-repulsion
reactome-recycling-pathway-of-l1	9.85674e-24	0.4606	0.984	0.906	1.20351e-20	1	reactome-recycling-pathway-of-l1
reactome-interleukin-37-signaling	7.25682e-23	0.346029	0.4	0.182	8.86058e-20	1	reactome-interleukin-37-signaling
reactome-l1cam-interactions	1.36521e-21	0.641007	0.998	0.964	1.66693e-18	1	reactome-l1cam-interactions
reactome-death-receptor-signalling	7.98361e-21	0.421466	1	0.994	9.74799e-18	1	reactome-death-receptor-signalling
reactome-cd28-dependent-vav1-pathway	8.0833e-21	0.508814	0.472	0.234	9.86971e-18	1	reactome-cd28-dependent-vav1-pathway
reactome-mitochondrial-translation	8.6855e-21	0.477019	0.982	0.956	1.0605e-17	1	reactome-mitochondrial-translation
reactome-golgi-associated-vesicle-biogenesis	1.84444e-20	0.314153	0.996	0.984	2.25207e-17	1	reactome-golgi-associated-vesicle-biogenesis
reactome-caspase-mediated-cleavage-of-cytoskeletal-proteins	2.2755e-20	0.393527	0.251	0.094	2.77839e-17	1	reactome-caspase-mediated-cleavage-of-cytoskeletal-proteins
reactome-abortive-elongation-of-hiv-1-transcript-in-the-absence-of-tat	2.98809e-20	0.493729	0.683	0.425	3.64845e-17	1	reactome-abortive-elongation-of-hiv-1-transcript-in-the-absence-of-tat
reactome-integration-of-energy-metabolism	1.51364e-19	0.835107	0.945	0.643	1.84815e-16	1	reactome-integration-of-energy-metabolism
reactome-gap-junction-degradation	1.24226e-18	0.400452	0.788	0.495	1.5168e-15	1	reactome-gap-junction-degradation
reactome-vegfr2-mediated-vascular-permeability	4.55706e-18	0.335576	0.681	0.399	5.56417e-15	1	reactome-vegfr2-mediated-vascular-permeability
reactome-transport-of-the-slbp-dependant-mature-mrna	5.5629e-18	0.287792	0.391	0.192	6.7923e-15	1	reactome-transport-of-the-slbp-dependant-mature-mrna
reactome-sumoylation-of-immune-response-proteins	9.16899e-18	0.380148	0.335	0.15	1.11953e-14	1	reactome-sumoylation-of-immune-response-proteins
reactome-transcriptional-regulation-of-white-adipocyte-differentiation	1.81929e-17	0.990644	0.915	0.694	2.22135e-14	1	reactome-transcriptional-regulation-of-white-adipocyte-differentiation
reactome-rab-gefs-exchange-gtp-for-gdp-on-rabs	1.90044e-17	0.998617	0.941	0.776	2.32043e-14	1	reactome-rab-gefs-exchange-gtp-for-gdp-on-rabs
reactome-regulation-of-ifng-signaling1	7.94737e-17	0.302106	0.409	0.21	9.70374e-14	1	reactome-regulation-of-ifng-signaling
reactome-mitochondrial-fatty-acid-beta-oxidation	8.2261e-17	0.42463	0.502	0.274	1.00441e-13	1	reactome-mitochondrial-fatty-acid-beta-oxidation
reactome-activation-of-bh3-only-proteins	1.06479e-16	0.44911	0.737	0.489	1.30011e-13	1	reactome-activation-of-bh3-only-proteins
reactome-export-of-viral-ribonucleoproteins-from-nucleus	1.87568e-16	0.295691	0.463	0.246	2.2902e-13	1	reactome-export-of-viral-ribonucleoproteins-from-nucleus
reactome-activation-of-bad-and-translocation-to-mitochondria	3.1965e-16	0.308921	0.541	0.305	3.90292e-13	1	reactome-activation-of-bad-and-translocation-to-mitochondria
reactome-g-alpha-12-13-signalling-events	5.44841e-15	0.616207	0.808	0.508	6.6525e-12	1	reactome-g-alpha-12-13-signalling-events
reactome-signaling-by-fgfr2-iiia-tm	5.73995e-15	0.372804	0.496	0.291	7.00848e-12	1	reactome-signaling-by-fgfr2-iiia-tm
reactome-rho-gtpases-activate-paks	7.23393e-15	0.34302	0.95	0.765	8.83263e-12	1	reactome-rho-gtpases-activate-paks
reactome-pyruvate-metabolism-and-citric-acid-tca-cycle	1.08718e-14	0.522841	0.9	0.812	1.32745e-11	1	reactome-pyruvate-metabolism-and-citric-acid-tca-cycle
reactome-cell-extracellular-matrix-interactions	1.70773e-14	0.251892	0.835	0.585	2.08513e-11	1	reactome-cell-extracellular-matrix-interactions
reactome-cd28-co-stimulation	1.72286e-14	0.348017	0.705	0.447	2.10361e-11	1	reactome-cd28-co-stimulation
reactome-transport-of-mature-mrnas-derived-from-intronless-transcripts	2.50135e-14	0.26348	0.502	0.282	3.05415e-11	1	reactome-transport-of-mature-mrnas-derived-from-intronless-transcripts
reactome-sumoylation-of-ubiquitinylation-proteins	1.05377e-13	0.261915	0.536	0.31	1.28665e-10	1	reactome-sumoylation-of-ubiquitinylation-proteins
reactome-interleukin-4-and-interleukin-13-signaling	1.9137e-13	0.317525	0.998	0.985	2.33663e-10	1	reactome-interleukin-4-and-interleukin-13-signaling
reactome-mitochondrial-protein-import	2.09244e-13	0.316986	0.984	0.948	2.55487e-10	1	reactome-mitochondrial-protein-import
reactome-rho-gtpases-activate-rocks	2.73917e-13	0.271175	0.941	0.798	3.34452e-10	1	reactome-rho-gtpases-activate-rocks
reactome-perk-regulates-gene-expression	1.05827e-12	0.322871	0.577	0.357	1.29215e-09	1	reactome-perk-regulates-gene-expression
reactome-biosynthesis-of-the-n-glycan-precursor-dolichol-lipid-linked-oligosaccharide-llo-and-transfer-to-a-nascent-protein	1.11828e-12	0.261795	0.591	0.342	1.36542e-09	1	reactome-biosynthesis-of-the-n-glycan-precursor-dolichol-lipid-linked-oligosaccharide-llo-and-transfer-to-a-nascent-protein
reactome-viral-messenger-rna-synthesis	1.75634e-12	0.5392	0.767	0.544	2.1445e-09	1	reactome-viral-messenger-rna-synthesis
reactome-rho-gtpase-cycle	2.00533e-12	0.784668	0.984	0.93	2.44851e-09	1	reactome-rho-gtpase-cycle
reactome-copi-mediated-anterograde-transport	2.09382e-12	0.410503	0.968	0.934	2.55655e-09	1	reactome-copi-mediated-anterograde-transport
reactome-formation-of-the-early-elongation-complex	2.96761e-12	0.403612	0.722	0.51	3.62346e-09	1	reactome-formation-of-the-early-elongation-complex
reactome-map2k-and-mapk-activation	1.25865e-11	0.30032	0.98	0.914	1.53682e-08	1	reactome-map2k-and-mapk-activation
reactome-signaling-by-scf-kit	2.86078e-11	0.321038	0.708	0.45	3.49301e-08	1	reactome-signaling-by-scf-kit
reactome-neurodegenerative-diseases	3.84485e-11	0.353817	0.644	0.444	4.69456e-08	1	reactome-neurodegenerative-diseases
reactome-golgi-to-er-retrograde-transport	3.93537e-11	0.476948	0.97	0.922	4.80508e-08	1	reactome-golgi-to-er-retrograde-transport
reactome-cooperation-of-pdcl-phlp1-and-tric-cct-in-g-protein-beta-folding	6.6795e-11	0.376525	0.769	0.547	8.15566e-08	1	reactome-cooperation-of-pdcl-phlp1-and-tric-cct-in-g-protein-beta-folding
reactome-slbp-dependent-processing-of-replication-dependent-histone-pre-mrnas	8.36583e-10	0.273559	0.276	0.148	1.02147e-06	1	reactome-slbp-dependent-processing-of-replication-dependent-histone-pre-mrnas
reactome-interactions-of-vpr-with-host-cellular-proteins	1.04689e-09	0.355566	0.819	0.591	1.27825e-06	1	reactome-interactions-of-vpr-with-host-cellular-proteins
reactome-microrna-mirna-biogenesis	2.1089e-09	0.309281	0.614	0.426	2.57497e-06	1	reactome-microrna-mirna-biogenesis
reactome-hiv-elongation-arrest-and-recovery	2.8726e-09	0.400821	0.722	0.523	3.50744e-06	1	reactome-hiv-elongation-arrest-and-recovery
reactome-sumoylation-of-sumoylation-proteins1	3.40089e-09	0.269461	0.621	0.419	4.15249e-06	1	reactome-sumoylation-of-sumoylation-proteins
reactome-ire1alpha-activates-chaperones	4.0201e-09	0.493698	0.779	0.568	4.90855e-06	1	reactome-ire1alpha-activates-chaperones
reactome-transcriptional-regulation-of-granulopoiesis	5.22457e-09	0.81974	0.97	0.798	6.3792e-06	1	reactome-transcriptional-regulation-of-granulopoiesis
reactome-intra-golgi-and-retrograde-golgi-to-er-traffic	7.12948e-09	0.463119	0.975	0.952	8.70509e-06	1	reactome-intra-golgi-and-retrograde-golgi-to-er-traffic
reactome-microautophagy	8.36719e-09	0.328967	0.685	0.496	1.02163e-05	1	reactome-microautophagy
reactome-cell-death-signalling-via-nrage-nrif-and-nade	5.26654e-08	0.46132	1	0.975	6.43044e-05	1	reactome-cell-death-signalling-via-nrage-nrif-and-nade
reactome-sumoylation-of-dna-replication-proteins	7.8395e-08	0.413853	0.701	0.5	9.57203e-05	1	reactome-sumoylation-of-dna-replication-proteins
reactome-intrinsic-pathway-for-apoptosis	1.21133e-07	0.366953	0.883	0.746	0.000147903	1	reactome-intrinsic-pathway-for-apoptosis
reactome-biological-oxidations	2.20087e-07	0.265184	0.785	0.508	0.000268726	1	reactome-biological-oxidations
reactome-insertion-of-tail-anchored-proteins-into-the-endoplasmic-reticulum-membrane	2.3129e-07	0.274574	0.706	0.531	0.000282405	1	reactome-insertion-of-tail-anchored-proteins-into-the-endoplasmic-reticulum-membrane
reactome-copi-independent-golgi-to-er-retrograde-traffic	2.56818e-07	0.367403	0.849	0.709	0.000313574	1	reactome-copi-independent-golgi-to-er-retrograde-traffic
reactome-pyruvate-metabolism	5.30908e-07	0.330179	0.674	0.495	0.000648238	1	reactome-pyruvate-metabolism
reactome-nef-and-signal-transduction	6.99997e-07	0.260627	0.317	0.192	0.000854696	1	reactome-nef-and-signal-transduction
reactome-tbc-rabgaps	1.0483e-06	0.305071	0.875	0.724	0.00127997	1	reactome-tbc-rabgaps
reactome-unfolded-protein-response-upr	1.72584e-06	0.542709	0.94	0.867	0.00210725	1	reactome-unfolded-protein-response-upr
reactome-sphingolipid-metabolism	4.57733e-06	0.253005	0.795	0.529	0.00558892	1	reactome-sphingolipid-metabolism
reactome-signaling-by-insulin-receptor	7.52933e-06	0.568853	0.913	0.674	0.00919331	1	reactome-signaling-by-insulin-receptor
reactome-phase-ii-conjugation-of-compounds	1.32711e-05	0.398882	0.817	0.558	0.016204	1	reactome-phase-ii-conjugation-of-compounds
reactome-regulation-of-pten-gene-transcription	0.000117314	0.471551	0.9	0.766	0.143241	1	reactome-regulation-of-pten-gene-transcription
reactome-formation-of-hiv-elongation-complex-in-the-absence-of-hiv-tat	0.000460274	0.322248	0.774	0.619	0.561995	1	reactome-formation-of-hiv-elongation-complex-in-the-absence-of-hiv-tat
reactome-fatty-acid-metabolism	0.000932609	0.734083	0.915	0.717	1	1	reactome-fatty-acid-metabolism
reactome-mitotic-prophase	0.00248271	0.303919	0.936	0.865	1	1	reactome-mitotic-prophase
reactome-trna-processing-in-the-nucleus	0.0044266	0.299813	0.68	0.513	1	1	reactome-trna-processing-in-the-nucleus
reactome-regulation-of-fzd-by-ubiquitination1	5.94208e-140	0.766324	1	0.912	7.25527e-137	2	reactome-regulation-of-fzd-by-ubiquitination
reactome-downregulation-of-erbb4-signaling	1.01768e-137	0.513637	1	0.913	1.24259e-134	2	reactome-downregulation-of-erbb4-signaling
reactome-irak2-mediated-activation-of-tak1-complex	4.67244e-130	0.511953	1	0.914	5.70505e-127	2	reactome-irak2-mediated-activation-of-tak1-complex
reactome-ticam1-traf6-dependent-induction-of-tak1-complex	2.73397e-127	0.508011	1	0.914	3.33818e-124	2	reactome-ticam1-traf6-dependent-induction-of-tak1-complex
reactome-inla-mediated-entry-of-listeria-monocytogenes-into-host-cells	5.44414e-126	0.51415	1	0.914	6.6473e-123	2	reactome-inla-mediated-entry-of-listeria-monocytogenes-into-host-cells
reactome-myoclonic-epilepsy-of-lafora	7.44075e-126	0.484344	1	0.918	9.08516e-123	2	reactome-myoclonic-epilepsy-of-lafora
reactome-signaling-by-notch1-hd-domain-mutants-in-cancer	2.87218e-122	0.530239	1	0.916	3.50693e-119	2	reactome-signaling-by-notch1-hd-domain-mutants-in-cancer
reactome-nonsense-mediated-decay-nmd	7.72402e-122	0.330638	1	1	9.43103e-119	2	reactome-nonsense-mediated-decay-nmd
[truncated: 636 more rows]

## Sheet: table s2-4 GO-based_GC-DEF
	p_val	avg_log2FC	pct.1	pct.2	p_val_adj	cluster	gene
[truncated: 4,444 more rows]

## Sheet: table s2-5 pathway-based_GC-DEF
	p_val	avg_log2FC	pct.1	pct.2	p_val_adj	cluster	gene
[truncated: 1,222 more rows]
