# Supplementary material for: FEM: mining biological meaning from cell level in single-cell RNA sequencing data
Source: PeerJ. 2021 Nov 30;9:e12570. doi: 10.7717/peerj.12570 (PMC8641482; doi:10.7717/peerj.12570)
Supplement: Supplemental Information 4 — Table S3-1 Differential expression of all genes between gene-based clusters. Table S3-2 Differential expression of all GO between GO-based clusters. Table S3-3 Differential expression of all GO between gene-based clusters. Table S3-4 Differential expression of all pathways between pathway-based clusters. Table S3-5 Differential expression of all pathways between gene-based clusters. [file peerj-09-12570-s004.xlsx]

## Sheet: table s3-1 GC-DEG
	p_val	avg_log2FC	pct.1	pct.2	p_val_adj	cluster	gene
DLK1	3.4238e-65	1.23185	0.956	0.226	5.73213e-61	0	DLK1
MCC	1.52582e-51	1.05851	0.982	0.434	2.55452e-47	0	MCC
EXPH5	1.15919e-50	1.06741	0.912	0.288	1.94072e-46	0	EXPH5
WDR72	2.22483e-48	0.860907	0.885	0.211	3.7248e-44	0	WDR72
KRT19	3.96873e-48	0.897809	1	0.714	6.64445e-44	0	KRT19
FOLR1	7.32221e-48	0.936776	0.761	0.142	1.22588e-43	0	FOLR1
HNF1B	7.39103e-48	0.63497	0.938	0.297	1.23741e-43	0	HNF1B
AMOT	3.75775e-47	0.928416	0.92	0.274	6.29122e-43	0	AMOT
CRABP2	8.72526e-47	0.921609	1	0.559	1.46078e-42	0	CRABP2
SMAD9	6.64518e-46	0.949079	0.894	0.357	1.11254e-41	0	SMAD9
ACE2	2.18083e-44	0.773749	0.558	0.065	3.65114e-40	0	ACE2
HESX1	9.93019e-44	1.13928	0.788	0.226	1.66251e-39	0	HESX1
ERBB4	5.03982e-43	0.9475	0.92	0.226	8.43767e-39	0	ERBB4
GATA4	5.59172e-43	0.911095	0.973	0.336	9.36165e-39	0	GATA4
ID1	6.53824e-43	0.906745	0.982	0.494	1.09463e-38	0	ID1
TBX3	2.50256e-42	0.86282	0.929	0.352	4.18979e-38	0	TBX3
GLIPR2	4.58297e-42	0.894573	0.991	0.514	7.67281e-38	0	GLIPR2
CCKBR	4.86962e-42	0.966901	0.956	0.258	8.15272e-38	0	CCKBR
GATA3	1.01869e-40	0.859477	0.832	0.258	1.70549e-36	0	GATA3
ATP1A4	5.05791e-40	0.687164	0.469	0.048	8.46795e-36	0	ATP1A4
GATA5	5.3391e-39	0.674861	0.619	0.11	8.93872e-35	0	GATA5
WFDC2	8.59837e-39	0.923147	0.991	0.492	1.43954e-34	0	WFDC2
GLUL	2.74595e-38	0.553388	1	0.889	4.59726e-34	0	GLUL
MYL7	4.2065e-38	0.858371	0.646	0.114	7.04252e-34	0	MYL7
FOXA2	1.24113e-37	0.723277	0.965	0.349	2.07789e-33	0	FOXA2
LGR4	1.32524e-37	0.849337	0.991	0.533	2.21872e-33	0	LGR4
LAMA1	1.37057e-37	0.871105	0.991	0.443	2.29461e-33	0	LAMA1
ADAMTS12	1.73277e-37	0.875948	0.903	0.355	2.901e-33	0	ADAMTS12
SAMD11	2.48647e-37	0.543497	0.619	0.119	4.16284e-33	0	SAMD11
TRIM71	4.67769e-37	0.721252	0.982	0.447	7.83139e-33	0	TRIM71
RNASE1	5.51137e-37	0.890196	1	0.565	9.22713e-33	0	RNASE1
SFRP1	1.23167e-36	0.829409	0.973	0.446	2.06206e-32	0	SFRP1
NEK2	8.85984e-36	0.99182	0.832	0.327	1.48331e-31	0	NEK2
CTSV	2.95616e-35	0.827102	1	0.563	4.94921e-31	0	CTSV
MUSTN1	5.08636e-35	0.980939	0.814	0.265	8.51559e-31	0	MUSTN1
SERINC5	5.36272e-35	0.566734	1	0.825	8.97827e-31	0	SERINC5
MYCL	7.10021e-35	0.468356	0.549	0.093	1.18872e-30	0	MYCL
FAM122B	1.90421e-34	0.97413	0.858	0.402	3.18803e-30	0	FAM122B
KRT8	2.5913e-34	0.698198	1	0.69	4.33836e-30	0	KRT8
SLC7A3	6.15098e-34	0.713897	0.858	0.239	1.0298e-29	0	SLC7A3
ESRRG	8.82914e-34	0.711858	0.619	0.131	1.47817e-29	0	ESRRG
SMAD6	1.70863e-33	0.563765	0.522	0.092	2.8606e-29	0	SMAD6
DNMBP	5.66174e-32	0.715922	0.947	0.533	9.47888e-28	0	DNMBP
MDK	7.88597e-32	0.506769	1	0.866	1.32027e-27	0	MDK
SMAGP	1.97132e-31	0.734159	0.938	0.577	3.30038e-27	0	SMAGP
VWA5A	2.40384e-31	0.856149	0.743	0.25	4.02451e-27	0	VWA5A
CFC1B	3.35202e-31	0.348579	0.301	0.02	5.61194e-27	0	CFC1B
ID3	6.07828e-31	0.578237	0.982	0.744	1.01763e-26	0	ID3
TBX20	6.15945e-31	0.462975	0.319	0.026	1.03121e-26	0	TBX20
PAPSS1	7.52116e-31	0.455225	1	0.881	1.25919e-26	0	PAPSS1
SEMA6A	9.45516e-31	0.74876	0.982	0.563	1.58298e-26	0	SEMA6A
ETNPPL	1.37388e-30	0.601272	0.301	0.021	2.30015e-26	0	ETNPPL
PEG10	3.06581e-30	0.759818	0.956	0.553	5.13278e-26	0	PEG10
C1orf64	6.81349e-30	0.292364	0.301	0.021	1.14072e-25	0	C1orf64
CA4	6.84272e-30	0.891428	0.681	0.212	1.14561e-25	0	CA4
CEP70	7.19391e-30	0.765827	0.938	0.517	1.2044e-25	0	CEP70
COL19A1	8.86756e-30	0.417539	0.345	0.035	1.48461e-25	0	COL19A1
LIN28A	1.03626e-29	0.828676	0.991	0.346	1.7349e-25	0	LIN28A
ACPP	1.07997e-29	0.708801	0.496	0.089	1.80809e-25	0	ACPP
USP2	1.72487e-29	0.59598	0.814	0.301	2.88777e-25	0	USP2
APPL1	2.43783e-29	0.476804	0.991	0.861	4.08141e-25	0	APPL1
B3GNT7	3.21479e-29	0.722029	0.885	0.34	5.3822e-25	0	B3GNT7
RAB3D	3.43119e-29	0.61701	0.982	0.616	5.74449e-25	0	RAB3D
PLCXD3	3.91779e-29	0.521443	0.451	0.074	6.55916e-25	0	PLCXD3
ARHGAP42	5.15439e-29	0.747306	0.867	0.378	8.62948e-25	0	ARHGAP42
FOXH1	6.92659e-29	0.660662	0.858	0.322	1.15965e-24	0	FOXH1
PTK2B	1.41213e-28	0.650747	0.796	0.279	2.36418e-24	0	PTK2B
CFC1	1.47148e-28	0.394304	0.31	0.027	2.46356e-24	0	CFC1
TRO	2.10115e-28	0.73242	0.929	0.471	3.51775e-24	0	TRO
SOX11	2.14793e-28	0.69746	0.973	0.5	3.59606e-24	0	SOX11
FAM65B	3.09284e-28	0.579261	0.628	0.158	5.17803e-24	0	FAM65B
PAIP2B	7.51364e-28	0.681027	0.752	0.267	1.25793e-23	0	PAIP2B
RDM1	2.1084e-27	0.33076	0.416	0.066	3.52988e-23	0	RDM1
CD24	2.16721e-27	0.730143	1	0.56	3.62834e-23	0	CD24
DNAJC15	2.21534e-27	0.374167	1	0.928	3.70892e-23	0	DNAJC15
AMHR2	3.22322e-27	0.703359	0.726	0.223	5.39632e-23	0	AMHR2
PCMTD2	4.29098e-27	0.402518	0.991	0.736	7.18397e-23	0	PCMTD2
FZD5	5.33472e-27	0.678122	1	0.58	8.93138e-23	0	FZD5
FILIP1	5.5866e-27	0.489903	0.487	0.098	9.35309e-23	0	FILIP1
CALM3	7.48345e-27	0.452798	1	0.873	1.25288e-22	0	CALM3
C10orf82	1.06847e-26	0.777526	0.699	0.252	1.78883e-22	0	C10orf82
RASGEF1B	1.50805e-26	0.589502	0.841	0.333	2.52478e-22	0	RASGEF1B
RGS9	1.90121e-26	0.535221	0.496	0.102	3.183e-22	0	RGS9
TRIM59	3.20647e-26	0.489719	0.982	0.736	5.36828e-22	0	TRIM59
UGT3A1	5.72827e-26	0.701194	0.566	0.155	9.59028e-22	0	UGT3A1
CCDC141	8.15828e-26	0.716057	0.876	0.395	1.36586e-21	0	CCDC141
CLDN19	8.30098e-26	0.659286	0.681	0.226	1.38975e-21	0	CLDN19
ID2	1.22587e-25	0.604741	1	0.745	2.05235e-21	0	ID2
SLC16A1	2.98686e-25	0.328671	1	0.943	5.0006e-21	0	SLC16A1
NR6A1	3.15073e-25	0.627371	0.991	0.557	5.27496e-21	0	NR6A1
HNF4A	3.69279e-25	0.573848	0.956	0.408	6.18247e-21	0	HNF4A
C18orf54	3.9e-25	0.650796	0.823	0.417	6.52938e-21	0	C18orf54
S100A13	4.62471e-25	0.306686	1	0.974	7.74269e-21	0	S100A13
SYTL5	7.71695e-25	0.504417	0.442	0.084	1.29197e-20	0	SYTL5
PBX1	9.73924e-25	0.414908	0.947	0.494	1.63054e-20	0	PBX1
AGL	1.17519e-24	0.605089	0.965	0.572	1.9675e-20	0	AGL
PGAM2	1.67408e-24	0.566978	0.31	0.038	2.80274e-20	0	PGAM2
MSH2	2.12587e-24	0.619846	0.947	0.596	3.55913e-20	0	MSH2
RGS2	2.14756e-24	0.733341	0.894	0.53	3.59545e-20	0	RGS2
ZNF397	2.93521e-24	0.64867	0.929	0.511	4.91413e-20	0	ZNF397
ARRDC3	5.61929e-24	0.469884	1	0.816	9.40782e-20	0	ARRDC3
CADM1	6.44874e-24	0.690794	0.876	0.408	1.07965e-19	0	CADM1
CSRP2BP	7.30921e-24	0.731977	0.832	0.486	1.22371e-19	0	CSRP2BP
EDA	8.2972e-24	0.527145	0.602	0.164	1.38912e-19	0	EDA
DAG1	9.87674e-24	0.532328	0.965	0.645	1.65356e-19	0	DAG1
ROBO1	1.01482e-23	0.63906	0.867	0.45	1.69902e-19	0	ROBO1
TMEM135	1.22237e-23	0.703276	0.903	0.578	2.04649e-19	0	TMEM135
APELA	1.43212e-23	0.695988	0.549	0.157	2.39765e-19	0	APELA
PPFIBP2	2.11435e-23	0.689649	0.929	0.45	3.53984e-19	0	PPFIBP2
S100A14	2.34271e-23	0.812228	0.991	0.462	3.92217e-19	0	S100A14
ZNF90	5.42931e-23	0.621018	0.982	0.56	9.08976e-19	0	ZNF90
FAM184A	6.42951e-23	0.767987	0.743	0.288	1.07643e-18	0	FAM184A
DSG2	6.44145e-23	0.585309	0.903	0.45	1.07843e-18	0	DSG2
CDH2	7.75955e-23	0.53229	1	0.759	1.2991e-18	0	CDH2
STMN1	1.80728e-22	0.381585	1	0.913	3.02574e-18	0	STMN1
LSM5	1.8998e-22	0.322762	1	0.902	3.18065e-18	0	LSM5
MSI1	2.27803e-22	0.306787	0.673	0.215	3.81388e-18	0	MSI1
CARHSP1	2.30887e-22	0.431355	1	0.786	3.8655e-18	0	CARHSP1
PCDH7	2.72774e-22	0.600704	0.956	0.494	4.56679e-18	0	PCDH7
CAMK2D	3.07174e-22	0.450673	1	0.884	5.14271e-18	0	CAMK2D
LYPD6B	3.31243e-22	0.725321	0.717	0.28	5.54566e-18	0	LYPD6B
TDGF1	5.38661e-22	0.770353	0.92	0.289	9.01827e-18	0	TDGF1
FKBP3	5.75063e-22	0.33129	1	0.899	9.62771e-18	0	FKBP3
PARD6B	8.93922e-22	0.568935	1	0.607	1.4966e-17	0	PARD6B
ZNF611	8.94264e-22	0.655985	0.85	0.462	1.49718e-17	0	ZNF611
SSBP3	9.42156e-22	0.512603	0.982	0.688	1.57736e-17	0	SSBP3
PROCA1	9.68572e-22	0.582214	0.434	0.101	1.62158e-17	0	PROCA1
ZNF730	1.07565e-21	0.746086	0.699	0.289	1.80086e-17	0	ZNF730
TET1	1.15663e-21	0.543962	0.867	0.389	1.93642e-17	0	TET1
SLC44A2	1.39854e-21	0.586722	0.92	0.598	2.34143e-17	0	SLC44A2
STK33	1.44662e-21	0.676812	0.566	0.179	2.42192e-17	0	STK33
RHOBTB3	2.63144e-21	0.480111	1	0.815	4.40556e-17	0	RHOBTB3
CDKN1C	2.75497e-21	0.436351	0.947	0.47	4.61237e-17	0	CDKN1C
MAGEB17	3.10933e-21	0.373252	0.522	0.127	5.20565e-17	0	MAGEB17
PODXL	3.39823e-21	0.600299	0.912	0.477	5.68932e-17	0	PODXL
SESN3	4.13649e-21	0.568733	0.876	0.428	6.9253e-17	0	SESN3
FXYD6	4.23e-21	0.627317	0.628	0.206	7.08186e-17	0	FXYD6
DNMT3A	5.05203e-21	0.403347	1	0.828	8.45811e-17	0	DNMT3A
SNX10	5.09695e-21	0.633554	0.699	0.28	8.53332e-17	0	SNX10
COLEC12	8.16201e-21	0.567714	0.637	0.223	1.36648e-16	0	COLEC12
PLCD1	9.32911e-21	0.655677	0.92	0.523	1.56188e-16	0	PLCD1
UNC5D	1.12943e-20	0.624312	0.389	0.086	1.89089e-16	0	UNC5D
ARL4D	1.74044e-20	0.570479	0.717	0.265	2.91385e-16	0	ARL4D
LY6E	2.01626e-20	0.279231	1	0.928	3.37563e-16	0	LY6E
EPCAM	2.52903e-20	0.611366	1	0.568	4.23411e-16	0	EPCAM
EPHB2	2.99345e-20	0.519102	0.752	0.327	5.01163e-16	0	EPHB2
RWDD3	3.23753e-20	0.509591	0.956	0.705	5.42027e-16	0	RWDD3
ADD3	3.59686e-20	0.369025	1	0.91	6.02187e-16	0	ADD3
PFDN4	3.80645e-20	0.32063	1	0.929	6.37277e-16	0	PFDN4
KLHL7	3.88464e-20	0.485817	0.912	0.717	6.50366e-16	0	KLHL7
DUSP13	4.18572e-20	0.436851	0.265	0.033	7.00774e-16	0	DUSP13
COL4A1	4.21617e-20	0.487575	0.982	0.777	7.05872e-16	0	COL4A1
KIFAP3	5.51297e-20	0.595392	0.876	0.663	9.22981e-16	0	KIFAP3
SYTL1	9.05263e-20	0.460137	0.442	0.11	1.51559e-15	0	SYTL1
SC5D	9.34703e-20	0.537978	0.894	0.709	1.56488e-15	0	SC5D
TMC7	9.62544e-20	0.514023	0.54	0.175	1.61149e-15	0	TMC7
TNNT1	1.29184e-19	0.645488	0.858	0.419	2.1628e-15	0	TNNT1
GRPR	1.35737e-19	0.579513	0.673	0.235	2.2725e-15	0	GRPR
PLCXD1	1.85397e-19	0.522105	0.956	0.596	3.10392e-15	0	PLCXD1
MBOAT2	1.88126e-19	0.606664	0.752	0.352	3.14961e-15	0	MBOAT2
CFAP221	2.17679e-19	0.490949	0.363	0.074	3.64438e-15	0	CFAP221
GPX3	2.47651e-19	0.377323	0.947	0.661	4.14617e-15	0	GPX3
GRB7	2.47775e-19	0.489677	0.566	0.181	4.14826e-15	0	GRB7
KLF8	3.33488e-19	0.409832	0.442	0.11	5.58326e-15	0	KLF8
PBDC1	3.43751e-19	0.34336	0.965	0.837	5.75507e-15	0	PBDC1
MEX3A	3.6145e-19	0.330383	0.628	0.226	6.0514e-15	0	MEX3A
BCR	3.79555e-19	0.573249	0.885	0.542	6.3545e-15	0	BCR
CCDC34	5.33104e-19	0.540076	0.858	0.492	8.92522e-15	0	CCDC34
LIFR	6.39984e-19	0.616756	0.92	0.569	1.07146e-14	0	LIFR
SLCO2A1	6.56194e-19	0.418109	0.628	0.199	1.0986e-14	0	SLCO2A1
GIPR	7.65908e-19	0.390786	0.407	0.09	1.28228e-14	0	GIPR
HIC2	7.98747e-19	0.447216	0.735	0.354	1.33726e-14	0	HIC2
ZNF281	1.03518e-18	0.437043	0.965	0.776	1.7331e-14	0	ZNF281
DNAH12	1.1096e-18	0.606025	0.381	0.089	1.85768e-14	0	DNAH12
BRD9	1.15268e-18	0.581007	0.858	0.539	1.92981e-14	0	BRD9
PET117	1.24356e-18	0.520481	0.965	0.669	2.08197e-14	0	PET117
ROR1	1.30321e-18	0.566842	0.788	0.39	2.18183e-14	0	ROR1
IGF2BP1	1.3501e-18	0.510081	0.973	0.614	2.26034e-14	0	IGF2BP1
TMEM209	1.45412e-18	0.403655	0.965	0.782	2.43449e-14	0	TMEM209
CCDC81	1.46089e-18	0.490261	0.619	0.188	2.44582e-14	0	CCDC81
BRD7	1.48124e-18	0.384243	0.973	0.785	2.47989e-14	0	BRD7
UCP2	1.66895e-18	0.630775	0.805	0.377	2.79416e-14	0	UCP2
C10orf35	2.0493e-18	0.58873	0.717	0.289	3.43093e-14	0	C10orf35
ZNF516	2.18836e-18	0.477441	0.894	0.467	3.66375e-14	0	ZNF516
GPRC5C	2.63522e-18	0.610073	0.69	0.279	4.41189e-14	0	GPRC5C
PCBD1	3.47291e-18	0.413935	0.991	0.791	5.81435e-14	0	PCBD1
PTPN13	3.73126e-18	0.537883	0.938	0.577	6.24687e-14	0	PTPN13
COL4A6	5.26202e-18	0.506425	0.655	0.25	8.80968e-14	0	COL4A6
GDPD1	5.80485e-18	0.641458	0.558	0.199	9.71848e-14	0	GDPD1
SRSF12	6.41495e-18	0.424018	0.655	0.252	1.07399e-13	0	SRSF12
LLGL2	6.89381e-18	0.58455	0.841	0.434	1.15416e-13	0	LLGL2
NUP62CL	7.9625e-18	0.418701	0.274	0.044	1.33308e-13	0	NUP62CL
GMPR	8.22565e-18	0.57317	0.584	0.208	1.37714e-13	0	GMPR
SOCS2	8.54997e-18	0.666886	0.77	0.384	1.43144e-13	0	SOCS2
DDIT4	8.62467e-18	0.643386	0.832	0.428	1.44394e-13	0	DDIT4
CCDC124	1.16346e-17	0.339811	0.991	0.834	1.94787e-13	0	CCDC124
DIDO1	1.35919e-17	0.501917	0.894	0.63	2.27555e-13	0	DIDO1
SCN7A	1.44266e-17	0.59623	0.566	0.179	2.41531e-13	0	SCN7A
RDH13	1.44367e-17	0.378702	0.788	0.444	2.41698e-13	0	RDH13
ZNF518A	1.64221e-17	0.453543	0.929	0.727	2.7494e-13	0	ZNF518A
TMEM185A	1.67837e-17	0.569757	0.805	0.402	2.80992e-13	0	TMEM185A
CLU	2.04294e-17	0.414414	0.991	0.818	3.42029e-13	0	CLU
NOSTRIN	2.47875e-17	0.378213	0.637	0.267	4.14993e-13	0	NOSTRIN
MOGAT3	2.48981e-17	0.363749	0.46	0.13	4.16844e-13	0	MOGAT3
GPX2	2.50895e-17	0.598419	0.566	0.193	4.20049e-13	0	GPX2
SCNN1A	2.51204e-17	0.502483	0.575	0.214	4.20566e-13	0	SCNN1A
OCLN	2.51772e-17	0.358443	1	0.738	4.21517e-13	0	OCLN
SLC5A5	2.62328e-17	0.560047	0.593	0.217	4.3919e-13	0	SLC5A5
BMF	3.0673e-17	0.339533	0.504	0.161	5.13527e-13	0	BMF
PTGR1	3.21316e-17	0.292389	1	0.938	5.37947e-13	0	PTGR1
APOO	3.32763e-17	0.452822	0.947	0.717	5.57112e-13	0	APOO
ADAM19	3.51005e-17	0.472301	0.832	0.432	5.87652e-13	0	ADAM19
NQO1	3.54586e-17	0.428596	0.982	0.845	5.93647e-13	0	NQO1
KLHDC9	3.93873e-17	0.595712	0.451	0.137	6.59422e-13	0	KLHDC9
GPC3	3.94366e-17	0.668303	0.991	0.539	6.60248e-13	0	GPC3
HIBADH	3.99448e-17	0.552395	0.876	0.557	6.68756e-13	0	HIBADH
CPVL	3.99896e-17	0.606771	0.858	0.446	6.69505e-13	0	CPVL
JUP	4.65325e-17	0.477079	0.92	0.584	7.79048e-13	0	JUP
ALAD	4.7964e-17	0.519089	0.77	0.386	8.03014e-13	0	ALAD
C9orf72	5.00225e-17	0.578252	0.876	0.604	8.37477e-13	0	C9orf72
TRAPPC11	5.12635e-17	0.549013	0.85	0.539	8.58254e-13	0	TRAPPC11
SRGAP3	5.52359e-17	0.516811	0.504	0.172	9.2476e-13	0	SRGAP3
FGFR2	6.44662e-17	0.543394	0.814	0.402	1.07929e-12	0	FGFR2
BAG4	8.02465e-17	0.275719	0.991	0.907	1.34349e-12	0	BAG4
ABHD11	8.07347e-17	0.545095	0.832	0.479	1.35166e-12	0	ABHD11
MAGEH1	8.98692e-17	0.52944	0.867	0.58	1.50459e-12	0	MAGEH1
TULP4	9.24915e-17	0.368705	1	0.866	1.54849e-12	0	TULP4
PTPLAD1	1.1318e-16	0.262725	1	0.92	1.89486e-12	0	PTPLAD1
PAAF1	1.47774e-16	0.503225	0.92	0.651	2.47402e-12	0	PAAF1
RGPD6	1.54308e-16	0.343638	1	0.916	2.58343e-12	0	RGPD6
ZNF709	1.56485e-16	0.343226	0.584	0.227	2.61987e-12	0	ZNF709
ANXA3	1.81209e-16	0.518771	0.929	0.63	3.03381e-12	0	ANXA3
C6orf211	1.8152e-16	0.418392	0.956	0.81	3.03901e-12	0	C6orf211
N4BP2	1.87698e-16	0.501073	0.929	0.673	3.14244e-12	0	N4BP2
SLX4IP	2.03583e-16	0.434011	0.876	0.622	3.40838e-12	0	SLX4IP
DEPTOR	2.05101e-16	0.567147	0.611	0.233	3.43381e-12	0	DEPTOR
RGPD3	2.45855e-16	0.309209	0.85	0.587	4.11611e-12	0	RGPD3
SEMA6D	2.71438e-16	0.530373	0.628	0.256	4.54441e-12	0	SEMA6D
SPINT2	3.05191e-16	0.56085	1	0.608	5.10951e-12	0	SPINT2
SEMA3E	3.2003e-16	0.598484	0.628	0.226	5.35794e-12	0	SEMA3E
LYSMD1	3.33459e-16	0.409394	0.77	0.428	5.58276e-12	0	LYSMD1
SALL1	3.40747e-16	0.468092	0.487	0.161	5.70478e-12	0	SALL1
LYPLAL1	3.42396e-16	0.464256	0.903	0.776	5.73239e-12	0	LYPLAL1
ARHGAP8	3.77935e-16	0.563788	0.726	0.333	6.32739e-12	0	ARHGAP8
METTL5	3.99493e-16	0.275303	0.982	0.89	6.68832e-12	0	METTL5
SYAP1	4.58566e-16	0.275351	1	0.967	7.67732e-12	0	SYAP1
DNAH14	4.60303e-16	0.551953	0.876	0.575	7.70639e-12	0	DNAH14
KIF21A	4.67693e-16	0.493046	0.912	0.571	7.83012e-12	0	KIF21A
PCP4	4.90842e-16	0.510272	0.257	0.044	8.21768e-12	0	PCP4
GATA6	5.12511e-16	0.485037	0.805	0.411	8.58045e-12	0	GATA6
RASSF6	5.69384e-16	0.469177	0.487	0.16	9.53262e-12	0	RASSF6
BCL11A	6.25979e-16	0.465299	0.593	0.214	1.04801e-11	0	BCL11A
ROGDI	6.9687e-16	0.509422	0.779	0.399	1.1667e-11	0	ROGDI
MCF2L2	8.71181e-16	0.490608	0.54	0.194	1.45853e-11	0	MCF2L2
PRSS1	9.08307e-16	0.331582	0.442	0.128	1.52069e-11	0	PRSS1
SOGA1	9.44935e-16	0.308003	0.611	0.259	1.58201e-11	0	SOGA1
SPAG16	1.02129e-15	0.529813	0.885	0.645	1.70984e-11	0	SPAG16
MAPK10	1.65657e-15	0.521073	0.558	0.197	2.77342e-11	0	MAPK10
GXYLT1	1.83331e-15	0.513188	0.796	0.503	3.06933e-11	0	GXYLT1
FGFR4	1.85191e-15	0.527359	0.779	0.405	3.10046e-11	0	FGFR4
SNX24	1.85626e-15	0.504848	0.885	0.59	3.10775e-11	0	SNX24
WDHD1	1.86807e-15	0.5147	0.788	0.446	3.12752e-11	0	WDHD1
CTSE	2.4047e-15	0.569351	0.54	0.182	4.02595e-11	0	CTSE
BTBD3	2.58059e-15	0.46487	0.779	0.413	4.32043e-11	0	BTBD3
ZCRB1	2.88105e-15	0.30023	1	0.905	4.82345e-11	0	ZCRB1
OTX2	2.94465e-15	0.547451	0.779	0.333	4.92993e-11	0	OTX2
RIC3	3.1897e-15	0.488687	0.646	0.285	5.3402e-11	0	RIC3
ACVR2B	3.24683e-15	0.449639	0.823	0.432	5.43584e-11	0	ACVR2B
SEC61A2	3.62333e-15	0.565427	0.752	0.396	6.06618e-11	0	SEC61A2
C1orf61	3.7618e-15	0.410056	0.416	0.117	6.29801e-11	0	C1orf61
RGPD8	4.25626e-15	0.374534	0.965	0.846	7.12584e-11	0	RGPD8
C9orf16	4.89207e-15	0.391486	0.973	0.712	8.19031e-11	0	C9orf16
PHACTR2	5.1177e-15	0.270701	1	0.929	8.56806e-11	0	PHACTR2
RBPMS2	5.37037e-15	0.450446	0.699	0.306	8.99107e-11	0	RBPMS2
RBBP7	5.59729e-15	0.313596	0.991	0.898	9.37099e-11	0	RBBP7
HMGB2	5.81031e-15	0.426393	0.991	0.753	9.72761e-11	0	HMGB2
LCP1	5.82056e-15	0.625659	0.699	0.328	9.74478e-11	0	LCP1
LIN7B	7.66411e-15	0.446028	0.575	0.223	1.28313e-10	0	LIN7B
SOX15	7.7434e-15	0.433869	0.549	0.215	1.2964e-10	0	SOX15
TLN2	8.17714e-15	0.414497	0.779	0.425	1.36902e-10	0	TLN2
DMKN	8.70524e-15	0.576435	0.929	0.508	1.45743e-10	0	DMKN
RBM11	9.08173e-15	0.466569	0.425	0.127	1.52046e-10	0	RBM11
MSANTD3.TMEFF1	9.60363e-15	0.569316	0.699	0.363	1.60784e-10	0	MSANTD3.TMEFF1
HIBCH	1.01351e-14	0.453944	0.92	0.723	1.69681e-10	0	HIBCH
GKAP1	1.19258e-14	0.52936	0.522	0.208	1.99661e-10	0	GKAP1
MAD2L2	1.30496e-14	0.405662	0.965	0.75	2.18477e-10	0	MAD2L2
ZNF486	1.30748e-14	0.503123	0.788	0.502	2.18898e-10	0	ZNF486
KIF27	1.36994e-14	0.501027	0.593	0.264	2.29356e-10	0	KIF27
ALDH2	1.40992e-14	0.455392	0.912	0.666	2.36049e-10	0	ALDH2
PCBP4	1.42956e-14	0.439804	0.655	0.295	2.39336e-10	0	PCBP4
ENPP2	1.46621e-14	0.39005	0.85	0.453	2.45473e-10	0	ENPP2
PRTG	1.669e-14	0.42435	0.575	0.244	2.79423e-10	0	PRTG
AP1M2	1.78611e-14	0.526074	0.92	0.486	2.99031e-10	0	AP1M2
XPO1	2.0743e-14	0.337713	0.991	0.893	3.4728e-10	0	XPO1
MYL4	2.12814e-14	0.505157	0.451	0.155	3.56292e-10	0	MYL4
CXADR	2.14245e-14	0.475227	0.991	0.669	3.58688e-10	0	CXADR
L1TD1	2.1779e-14	0.473225	0.752	0.28	3.64625e-10	0	L1TD1
EIF4EBP2	2.24318e-14	0.268391	1	0.943	3.75554e-10	0	EIF4EBP2
NAE1	2.35107e-14	0.290104	0.982	0.877	3.93616e-10	0	NAE1
CEP290	2.54572e-14	0.384673	0.929	0.752	4.26204e-10	0	CEP290
CKB	2.64828e-14	0.397361	1	0.762	4.43374e-10	0	CKB
PLSCR2	2.92705e-14	0.565061	0.496	0.172	4.90046e-10	0	PLSCR2
APOC1	2.97166e-14	0.58503	1	0.616	4.97516e-10	0	APOC1
RAB3B	3.01883e-14	0.364949	0.956	0.755	5.05412e-10	0	RAB3B
ESRP1	3.12842e-14	0.501253	0.929	0.52	5.2376e-10	0	ESRP1
TNNI3	3.30424e-14	0.531962	0.664	0.297	5.53197e-10	0	TNNI3
CERS6	3.32984e-14	0.424599	0.69	0.345	5.57483e-10	0	CERS6
CDC42EP4	4.04387e-14	0.416073	0.655	0.309	6.77025e-10	0	CDC42EP4
CHST9	4.05868e-14	0.534122	0.717	0.37	6.79504e-10	0	CHST9
CYP4X1	4.16394e-14	0.421879	0.478	0.161	6.97127e-10	0	CYP4X1
CCDC28B	4.48941e-14	0.513593	0.77	0.44	7.51616e-10	0	CCDC28B
HNRNPA0	4.65157e-14	0.372108	0.973	0.788	7.78766e-10	0	HNRNPA0
CXXC4	4.68615e-14	0.464167	0.584	0.242	7.84555e-10	0	CXXC4
CGN	4.88919e-14	0.51628	0.841	0.455	8.18548e-10	0	CGN
APOA1	4.89639e-14	0.652959	0.991	0.508	8.19753e-10	0	APOA1
KRT18	4.91461e-14	0.383975	0.991	0.748	8.22805e-10	0	KRT18
ZNF682	4.99315e-14	0.56004	0.796	0.452	8.35953e-10	0	ZNF682
CBR4	5.20404e-14	0.330813	0.973	0.837	8.71261e-10	0	CBR4
DPH6	5.43347e-14	0.497737	0.876	0.599	9.09671e-10	0	DPH6
BMP2	6.11766e-14	0.472956	0.796	0.434	1.02422e-09	0	BMP2
RGPD1	7.19418e-14	0.25854	0.699	0.38	1.20445e-09	0	RGPD1
WBSCR27	7.60269e-14	0.521441	0.442	0.163	1.27284e-09	0	WBSCR27
CYHR1	7.76209e-14	0.4824	0.584	0.256	1.29953e-09	0	CYHR1
CAPG	7.83441e-14	0.377434	0.885	0.715	1.31164e-09	0	CAPG
IGDCC4	1.00014e-13	0.520759	0.788	0.471	1.67444e-09	0	IGDCC4
SLC7A7	1.09265e-13	0.545837	0.867	0.459	1.82932e-09	0	SLC7A7
REEP6	1.12618e-13	0.478139	0.965	0.479	1.88544e-09	0	REEP6
DNMT3B	1.12859e-13	0.422759	0.796	0.334	1.88948e-09	0	DNMT3B
DPPA4	1.24066e-13	0.493503	0.823	0.38	2.07711e-09	0	DPPA4
RMND1	2.08383e-13	0.393433	0.92	0.765	3.48875e-09	0	RMND1
RND2	2.1009e-13	0.366497	0.628	0.273	3.51732e-09	0	RND2
TRIM68	2.29618e-13	0.375162	0.381	0.113	3.84427e-09	0	TRIM68
SRGAP2	2.31044e-13	0.336145	0.991	0.869	3.86813e-09	0	SRGAP2
VAMP8	2.48578e-13	0.404566	0.973	0.724	4.16169e-09	0	VAMP8
CRB3	2.82613e-13	0.430963	0.717	0.339	4.73151e-09	0	CRB3
MACROD2	3.17419e-13	0.436232	0.354	0.104	5.31423e-09	0	MACROD2
FZD4	3.37737e-13	0.448899	0.85	0.548	5.65439e-09	0	FZD4
CKAP5	3.43317e-13	0.28306	0.982	0.883	5.74782e-09	0	CKAP5
SEPSECS	4.80899e-13	0.473716	0.619	0.298	8.0512e-09	0	SEPSECS
DHX29	6.27429e-13	0.306987	0.92	0.845	1.05044e-08	0	DHX29
FGD6	7.24288e-13	0.438827	0.814	0.503	1.2126e-08	0	FGD6
ZNF415	7.70631e-13	0.544249	0.628	0.306	1.29019e-08	0	ZNF415
KIF16B	7.83635e-13	0.423528	0.867	0.539	1.31196e-08	0	KIF16B
THOC3	8.29264e-13	0.366998	0.894	0.705	1.38835e-08	0	THOC3
SOX5	8.79898e-13	0.367361	0.283	0.068	1.47313e-08	0	SOX5
AADAT	8.823e-13	0.466636	0.54	0.235	1.47715e-08	0	AADAT
TMEM141	9.80438e-13	0.333715	0.965	0.815	1.64145e-08	0	TMEM141
RAB25	1.02261e-12	0.50749	0.823	0.437	1.71205e-08	0	RAB25
TXNIP	1.04819e-12	0.549624	0.85	0.524	1.75488e-08	0	TXNIP
GXYLT2	1.07736e-12	0.473002	0.912	0.559	1.80372e-08	0	GXYLT2
BMP7	1.11105e-12	0.384076	0.425	0.152	1.86012e-08	0	BMP7
GEMIN2	1.21024e-12	0.478505	0.805	0.556	2.02619e-08	0	GEMIN2
PDLIM7	1.41625e-12	0.375331	0.965	0.735	2.37108e-08	0	PDLIM7
WDR33	1.77354e-12	0.39572	0.947	0.771	2.96927e-08	0	WDR33
NDRG2	1.78181e-12	0.365872	0.292	0.074	2.98311e-08	0	NDRG2
CCDC24	1.88476e-12	0.424792	0.584	0.264	3.15547e-08	0	CCDC24
RFC4	2.28554e-12	0.435515	0.894	0.62	3.82646e-08	0	RFC4
POLE2	2.3798e-12	0.48573	0.681	0.36	3.98426e-08	0	POLE2
FANCD2	2.41187e-12	0.430052	0.885	0.536	4.03796e-08	0	FANCD2
MTERF4	2.56742e-12	0.472438	0.814	0.59	4.29838e-08	0	MTERF4
ZNF286B	2.65413e-12	0.300116	0.956	0.813	4.44354e-08	0	ZNF286B
TMEM133	2.69299e-12	0.489601	0.451	0.175	4.5086e-08	0	TMEM133
ZNF91	2.72699e-12	0.427539	0.947	0.693	4.56553e-08	0	ZNF91
CHD6	2.79175e-12	0.370139	0.956	0.756	4.67395e-08	0	CHD6
OIP5	3.03481e-12	0.517511	0.611	0.333	5.08088e-08	0	OIP5
DYNC2LI1	3.08443e-12	0.478674	0.796	0.527	5.16396e-08	0	DYNC2LI1
RAB11FIP4	3.10682e-12	0.377283	0.611	0.282	5.20144e-08	0	RAB11FIP4
IFT52	3.37342e-12	0.318622	0.92	0.804	5.64778e-08	0	IFT52
CSE1L	3.49945e-12	0.308037	0.982	0.84	5.85877e-08	0	CSE1L
DSC2	3.64155e-12	0.381154	0.717	0.372	6.09668e-08	0	DSC2
C5orf34	3.70922e-12	0.595258	0.54	0.267	6.20997e-08	0	C5orf34
HELLS	4.27638e-12	0.485406	0.982	0.645	7.15951e-08	0	HELLS
MYBL2	4.30204e-12	0.458648	0.708	0.39	7.20248e-08	0	MYBL2
C2orf88	4.50471e-12	0.476091	0.478	0.193	7.54178e-08	0	C2orf88
FAM118A	4.59162e-12	0.457668	0.796	0.503	7.6873e-08	0	FAM118A
C1orf168	4.8396e-12	0.359787	0.469	0.164	8.10245e-08	0	C1orf168
ISCA2	4.88812e-12	0.387432	0.938	0.73	8.18369e-08	0	ISCA2
GPC6	4.97729e-12	0.420443	0.779	0.452	8.33299e-08	0	GPC6
PLTP	5.70397e-12	0.487455	0.788	0.488	9.54959e-08	0	PLTP
MARVELD2	6.59824e-12	0.281768	0.885	0.575	1.10468e-07	0	MARVELD2
MYO6	6.96007e-12	0.287033	0.982	0.861	1.16526e-07	0	MYO6
SCAPER	7.14702e-12	0.457948	0.858	0.628	1.19655e-07	0	SCAPER
KIAA1161	7.41978e-12	0.397802	0.522	0.226	1.24222e-07	0	KIAA1161
SLC2A3	7.47204e-12	0.284258	1	0.925	1.25097e-07	0	SLC2A3
GNG2	7.64249e-12	0.411308	0.442	0.163	1.27951e-07	0	GNG2
PCLO	8.14307e-12	0.331617	0.398	0.134	1.36331e-07	0	PCLO
MMS22L	8.16465e-12	0.471193	0.77	0.518	1.36693e-07	0	MMS22L
APOA2	8.21014e-12	0.601736	1	0.613	1.37454e-07	0	APOA2
AGPAT4	8.69543e-12	0.414689	0.54	0.242	1.45579e-07	0	AGPAT4
CPE	8.74528e-12	0.416055	0.867	0.432	1.46414e-07	0	CPE
DENND2C	9.01146e-12	0.494029	0.823	0.488	1.5087e-07	0	DENND2C
ZNF43	9.35216e-12	0.316306	0.823	0.616	1.56574e-07	0	ZNF43
GGT7	1.02071e-11	0.380868	0.451	0.175	1.70887e-07	0	GGT7
RGPD2	1.03153e-11	0.261945	0.85	0.599	1.72698e-07	0	RGPD2
ITM2C	1.11818e-11	0.381993	0.973	0.646	1.87205e-07	0	ITM2C
ITGB3BP	1.12867e-11	0.449015	0.858	0.599	1.88963e-07	0	ITGB3BP
SETSIP	1.13398e-11	0.31602	0.867	0.53	1.89851e-07	0	SETSIP
FAM117B	1.14405e-11	0.446603	0.743	0.467	1.91537e-07	0	FAM117B
VEZT	1.15084e-11	0.293304	0.965	0.843	1.92674e-07	0	VEZT
ABCA1	1.15415e-11	0.407627	0.965	0.678	1.93229e-07	0	ABCA1
MRPS18A	1.32083e-11	0.308604	0.956	0.804	2.21133e-07	0	MRPS18A
TMEM107	1.34079e-11	0.466819	0.752	0.456	2.24476e-07	0	TMEM107
MIS18A	1.38205e-11	0.427625	0.876	0.551	2.31383e-07	0	MIS18A
AS3MT	1.51227e-11	0.421116	0.566	0.268	2.53184e-07	0	AS3MT
SIPA1L2	1.65077e-11	0.373806	0.796	0.444	2.76372e-07	0	SIPA1L2
STRA6	1.74141e-11	0.397759	0.292	0.081	2.91547e-07	0	STRA6
SH3BGRL2	1.89254e-11	0.416116	0.77	0.459	3.16849e-07	0	SH3BGRL2
BRD3	1.93268e-11	0.31693	0.965	0.786	3.2357e-07	0	BRD3
FLRT3	2.00655e-11	0.467413	0.743	0.395	3.35936e-07	0	FLRT3
CCDC169	2.12384e-11	0.47801	0.708	0.387	3.55574e-07	0	CCDC169
PRIM2	2.43274e-11	0.470472	0.788	0.548	4.07289e-07	0	PRIM2
SNRPA	2.43328e-11	0.366836	0.912	0.655	4.0738e-07	0	SNRPA
TMEM191B	2.44221e-11	0.262305	0.434	0.164	4.08874e-07	0	TMEM191B
B4GALT7	2.45005e-11	0.457718	0.655	0.393	4.10188e-07	0	B4GALT7
ZNF326	2.55443e-11	0.270723	0.991	0.843	4.27663e-07	0	ZNF326
ZNF138	2.58147e-11	0.556957	0.664	0.411	4.3219e-07	0	ZNF138
RRM1	2.60999e-11	0.379416	0.956	0.723	4.36964e-07	0	RRM1
ZNF280B	2.67545e-11	0.440743	0.726	0.42	4.47924e-07	0	ZNF280B
UPF3B	3.39317e-11	0.380177	0.92	0.726	5.68084e-07	0	UPF3B
AMZ2	3.48664e-11	0.30275	0.973	0.842	5.83733e-07	0	AMZ2
AFF1	3.67393e-11	0.343157	0.938	0.729	6.15089e-07	0	AFF1
ALDH7A1	3.90731e-11	0.339921	0.973	0.762	6.54162e-07	0	ALDH7A1
POLB	4.01224e-11	0.417516	0.85	0.595	6.71729e-07	0	POLB
NPY	4.19091e-11	0.478134	0.265	0.071	7.01641e-07	0	NPY
RAI2	4.1935e-11	0.279649	0.283	0.08	7.02076e-07	0	RAI2
YPEL2	4.32361e-11	0.401146	0.867	0.512	7.23859e-07	0	YPEL2
TWISTNB	4.39273e-11	0.348582	0.956	0.75	7.35431e-07	0	TWISTNB
SKIDA1	4.40987e-11	0.326606	0.434	0.178	7.383e-07	0	SKIDA1
ZSCAN18	5.25582e-11	0.393969	0.708	0.377	8.7993e-07	0	ZSCAN18
CLDN7	5.27218e-11	0.420336	0.876	0.53	8.82668e-07	0	CLDN7
TTI1	5.36569e-11	0.385645	0.832	0.547	8.98324e-07	0	TTI1
MAGEF1	5.37267e-11	0.42399	0.726	0.425	8.99493e-07	0	MAGEF1
ORC3	5.38852e-11	0.341773	0.956	0.791	9.02146e-07	0	ORC3
ICE2	5.6847e-11	0.38123	0.867	0.688	9.51732e-07	0	ICE2
ZNF248	5.828e-11	0.436891	0.619	0.324	9.75724e-07	0	ZNF248
ATP6V1G2.DDX39B	6.14089e-11	0.465929	0.522	0.248	1.02811e-06	0	ATP6V1G2.DDX39B
CASD1	6.17411e-11	0.433799	0.735	0.411	1.03367e-06	0	CASD1
TBCB	6.49591e-11	0.291591	0.929	0.824	1.08754e-06	0	TBCB
DCP1A	7.28007e-11	0.340274	0.973	0.821	1.21883e-06	0	DCP1A
CPSF3	7.56004e-11	0.337315	0.947	0.747	1.2657e-06	0	CPSF3
SGPL1	7.78111e-11	0.338439	0.938	0.748	1.30271e-06	0	SGPL1
INTS2	7.81674e-11	0.399031	0.743	0.468	1.30868e-06	0	INTS2
FRAS1	7.87153e-11	0.416731	0.673	0.383	1.31785e-06	0	FRAS1
FGF13	8.03334e-11	0.406632	0.593	0.277	1.34494e-06	0	FGF13
TMEM38B	8.37175e-11	0.429417	0.805	0.544	1.4016e-06	0	TMEM38B
MRPL28	8.67396e-11	0.287104	0.956	0.824	1.45219e-06	0	MRPL28
TMTC3	8.69647e-11	0.281359	0.982	0.855	1.45596e-06	0	TMTC3
TSKU	8.98915e-11	0.369402	0.779	0.425	1.50496e-06	0	TSKU
CREB3L2	9.11649e-11	0.276514	0.965	0.845	1.52628e-06	0	CREB3L2
GGH	9.35567e-11	0.322984	0.929	0.752	1.56633e-06	0	GGH
MPC2	9.7e-11	0.250735	0.991	0.925	1.62397e-06	0	MPC2
APOE	9.9222e-11	0.486516	1	0.577	1.66118e-06	0	APOE
CSPP1	9.9308e-11	0.346131	0.929	0.732	1.66262e-06	0	CSPP1
ZNF737	1.03352e-10	0.43544	0.628	0.328	1.73032e-06	0	ZNF737
ELF3	1.14526e-10	0.434656	0.602	0.277	1.91739e-06	0	ELF3
PGBD1	1.16781e-10	0.39561	0.673	0.366	1.95514e-06	0	PGBD1
NLGN4X	1.29467e-10	0.412276	0.628	0.315	2.16753e-06	0	NLGN4X
SMIM8	1.30198e-10	0.547463	0.664	0.435	2.17978e-06	0	SMIM8
CPSF4	1.31292e-10	0.458578	0.735	0.476	2.19809e-06	0	CPSF4
TMSB15B	1.32276e-10	0.437684	0.664	0.372	2.21456e-06	0	TMSB15B
TOP2B	1.38885e-10	0.316207	0.956	0.864	2.32521e-06	0	TOP2B
POLR2C	1.39378e-10	0.285073	0.965	0.824	2.33347e-06	0	POLR2C
ZFP30	1.43589e-10	0.41899	0.619	0.319	2.40396e-06	0	ZFP30
KIAA1958	1.57827e-10	0.336997	0.646	0.337	2.64234e-06	0	KIAA1958
ZNF714	1.62989e-10	0.419313	0.867	0.608	2.72877e-06	0	ZNF714
GCNT4	1.68139e-10	0.448482	0.611	0.334	2.81498e-06	0	GCNT4
YEATS4	1.69551e-10	0.387684	0.858	0.687	2.83862e-06	0	YEATS4
NIPSNAP1	1.69784e-10	0.355067	0.956	0.735	2.84252e-06	0	NIPSNAP1
ATAD5	1.82956e-10	0.42092	0.69	0.449	3.06305e-06	0	ATAD5
PRKAB2	1.98915e-10	0.379589	0.903	0.672	3.33024e-06	0	PRKAB2
PLEKHA5	2.00581e-10	0.369751	0.938	0.681	3.35813e-06	0	PLEKHA5
SPATA7	2.03615e-10	0.459794	0.726	0.476	3.40892e-06	0	SPATA7
HMGN5	2.03877e-10	0.497586	0.637	0.381	3.4133e-06	0	HMGN5
ZNF608	2.06093e-10	0.385977	0.708	0.408	3.4504e-06	0	ZNF608
ANKRD7	2.14654e-10	0.396561	0.257	0.069	3.59374e-06	0	ANKRD7
MBTPS2	2.20026e-10	0.403642	0.814	0.569	3.68368e-06	0	MBTPS2
TYRO3	2.29653e-10	0.438568	0.717	0.431	3.84485e-06	0	TYRO3
PCDHB2	2.32979e-10	0.360846	0.522	0.248	3.90053e-06	0	PCDHB2
MTMR2	2.38195e-10	0.340276	0.885	0.748	3.98786e-06	0	MTMR2
ATXN7L3B	2.40489e-10	0.265106	0.991	0.866	4.02626e-06	0	ATXN7L3B
IPP	2.49735e-10	0.409059	0.655	0.364	4.18107e-06	0	IPP
PLEKHJ1	2.54299e-10	0.339062	0.965	0.776	4.25747e-06	0	PLEKHJ1
LGALSL	2.57153e-10	0.410974	0.77	0.476	4.30525e-06	0	LGALSL
AHCY	2.57733e-10	0.299704	1	0.846	4.31497e-06	0	AHCY
OSGEPL1	2.60899e-10	0.417783	0.735	0.434	4.36798e-06	0	OSGEPL1
ABHD4	2.62128e-10	0.40156	0.903	0.628	4.38855e-06	0	ABHD4
IFI27L1	2.62728e-10	0.251231	0.832	0.559	4.39859e-06	0	IFI27L1
PXK	2.65365e-10	0.405101	0.832	0.578	4.44275e-06	0	PXK
GREB1L	2.77218e-10	0.395173	0.504	0.235	4.64119e-06	0	GREB1L
TRIM45	3.27199e-10	0.377917	0.549	0.277	5.47796e-06	0	TRIM45
XRCC4	3.46316e-10	0.41115	0.779	0.52	5.79803e-06	0	XRCC4
RASL12	3.92528e-10	0.381718	0.354	0.13	6.57171e-06	0	RASL12
TSTD1	4.12593e-10	0.30153	0.965	0.812	6.90763e-06	0	TSTD1
ARID3B	4.25662e-10	0.354886	0.85	0.485	7.12643e-06	0	ARID3B
CALB1	4.50579e-10	0.336239	0.584	0.28	7.5436e-06	0	CALB1
FAM193B	4.91303e-10	0.406015	0.77	0.497	8.22539e-06	0	FAM193B
CNNM4	4.93923e-10	0.250501	0.363	0.13	8.26926e-06	0	CNNM4
TIA1	5.19644e-10	0.293042	0.973	0.866	8.69987e-06	0	TIA1
LSM4	5.25041e-10	0.285901	1	0.866	8.79024e-06	0	LSM4
LANCL1	5.57965e-10	0.439311	0.752	0.527	9.34144e-06	0	LANCL1
VTN	5.99395e-10	0.392591	0.92	0.393	1.00351e-05	0	VTN
RIMKLB	6.17003e-10	0.296809	0.903	0.783	1.03299e-05	0	RIMKLB
PBX3	6.37692e-10	0.289166	0.619	0.367	1.06762e-05	0	PBX3
HARS2	6.47235e-10	0.421878	0.735	0.462	1.0836e-05	0	HARS2
LIG3	7.02331e-10	0.388194	0.841	0.577	1.17584e-05	0	LIG3
MSH6	8.00859e-10	0.303772	0.938	0.822	1.3408e-05	0	MSH6
CLCN3	8.44677e-10	0.298264	0.912	0.824	1.41416e-05	0	CLCN3
ID4	8.71166e-10	0.289784	0.531	0.223	1.45851e-05	0	ID4
DNAJC22	8.8449e-10	0.339925	0.602	0.285	1.48081e-05	0	DNAJC22
ZNF334	8.92361e-10	0.429327	0.726	0.453	1.49399e-05	0	ZNF334
MLF1	9.52614e-10	0.429489	0.752	0.494	1.59487e-05	0	MLF1
ZFP42	9.65358e-10	0.41498	0.699	0.378	1.6162e-05	0	ZFP42
POLA1	1.12639e-09	0.347199	0.85	0.533	1.8858e-05	0	POLA1
PCDH10	1.16221e-09	0.300814	0.487	0.226	1.94576e-05	0	PCDH10
FBXO7	1.24283e-09	0.284616	0.973	0.837	2.08075e-05	0	FBXO7
B4GALT4	1.30161e-09	0.374308	0.938	0.717	2.17916e-05	0	B4GALT4
SLC37A4	1.36616e-09	0.415934	0.743	0.465	2.28722e-05	0	SLC37A4
SH3RF2	1.39654e-09	0.400482	0.354	0.14	2.33809e-05	0	SH3RF2
HFM1	1.48815e-09	0.374274	0.292	0.096	2.49146e-05	0	HFM1
ORC6	1.51369e-09	0.351918	0.894	0.669	2.53421e-05	0	ORC6
BEX1	1.65528e-09	0.44235	0.885	0.547	2.77127e-05	0	BEX1
RFX6	1.73463e-09	0.3593	0.389	0.142	2.90412e-05	0	RFX6
CCDC167	1.76322e-09	0.289113	0.947	0.791	2.95199e-05	0	CCDC167
DCXR	1.80755e-09	0.280659	0.903	0.767	3.02621e-05	0	DCXR
MTL5	1.81525e-09	0.360848	0.558	0.268	3.0391e-05	0	MTL5
C21orf91	1.85705e-09	0.430033	0.735	0.461	3.10907e-05	0	C21orf91
HAUS1	1.91146e-09	0.287304	0.965	0.791	3.20016e-05	0	HAUS1
SPATA6	1.93512e-09	0.337249	0.673	0.363	3.23977e-05	0	SPATA6
CHD7	1.94409e-09	0.34817	0.912	0.604	3.2548e-05	0	CHD7
CORO1B	1.95721e-09	0.360545	0.761	0.48	3.27677e-05	0	CORO1B
EPHX2	2.40629e-09	0.399801	0.602	0.282	4.0286e-05	0	EPHX2
PIN1	2.41249e-09	0.367351	0.77	0.592	4.03898e-05	0	PIN1
ANKMY2	2.49186e-09	0.392025	0.735	0.467	4.17187e-05	0	ANKMY2
BMPR1A	2.62147e-09	0.329607	0.681	0.431	4.38887e-05	0	BMPR1A
CCDC171	2.64439e-09	0.299923	0.434	0.191	4.42724e-05	0	CCDC171
CENPH	2.65501e-09	0.436867	0.611	0.348	4.44502e-05	0	CENPH
TVP23A	2.67582e-09	0.294589	0.398	0.155	4.47985e-05	0	TVP23A
C14orf37	2.70469e-09	0.384937	0.522	0.265	4.52818e-05	0	C14orf37
DSN1	2.82796e-09	0.415525	0.752	0.524	4.73457e-05	0	DSN1
MAP3K1	3.13332e-09	0.36661	0.761	0.53	5.2458e-05	0	MAP3K1
ZNF354A	3.14624e-09	0.411831	0.619	0.366	5.26744e-05	0	ZNF354A
FANCL	3.36674e-09	0.375601	0.796	0.613	5.63659e-05	0	FANCL
PPCDC	3.43414e-09	0.443266	0.655	0.44	5.74944e-05	0	PPCDC
ZC3H8	3.46583e-09	0.345631	0.832	0.544	5.8025e-05	0	ZC3H8
KRTCAP3	3.47715e-09	0.38696	0.779	0.434	5.82144e-05	0	KRTCAP3
CCDC125	3.50134e-09	0.265094	0.664	0.429	5.86195e-05	0	CCDC125
FOXRED1	3.52458e-09	0.331212	0.903	0.687	5.90085e-05	0	FOXRED1
COL4A5	3.62054e-09	0.390979	0.717	0.416	6.06152e-05	0	COL4A5
CKAP2	3.65874e-09	0.350758	0.823	0.666	6.12546e-05	0	CKAP2
TMEM70	3.87707e-09	0.365538	0.814	0.637	6.49099e-05	0	TMEM70
H2AFY2	3.92189e-09	0.302388	0.575	0.28	6.56603e-05	0	H2AFY2
ZNF765	4.06953e-09	0.361216	0.735	0.473	6.8132e-05	0	ZNF765
SLC2A14	4.0911e-09	0.300067	0.982	0.711	6.84932e-05	0	SLC2A14
TIMM17B	4.26458e-09	0.262625	0.991	0.848	7.13977e-05	0	TIMM17B
ANK3	4.26764e-09	0.455969	0.646	0.395	7.14488e-05	0	ANK3
MDM1	4.3966e-09	0.419844	0.752	0.514	7.36079e-05	0	MDM1
HMGCS1	4.51136e-09	0.280899	0.982	0.892	7.55291e-05	0	HMGCS1
FNBP1L	4.65614e-09	0.303877	0.947	0.761	7.7953e-05	0	FNBP1L
VRK2	4.78818e-09	0.398359	0.77	0.559	8.01638e-05	0	VRK2
INTU	4.92698e-09	0.321563	0.726	0.471	8.24876e-05	0	INTU
SLC25A39	4.94596e-09	0.310566	0.991	0.813	8.28053e-05	0	SLC25A39
PNPLA4	5.14075e-09	0.371322	0.885	0.667	8.60664e-05	0	PNPLA4
DAK	5.40502e-09	0.393428	0.513	0.255	9.04908e-05	0	DAK
SPINT1	5.7467e-09	0.330175	0.788	0.453	9.62112e-05	0	SPINT1
PTGDS	5.76858e-09	0.27996	0.327	0.117	9.65775e-05	0	PTGDS
FZD3	5.8142e-09	0.336616	0.584	0.294	9.73414e-05	0	FZD3
CYP27A1	5.95237e-09	0.355768	0.602	0.322	9.96545e-05	0	CYP27A1
PFKFB2	6.25704e-09	0.341685	0.619	0.342	0.000104755	0	PFKFB2
MND1	6.28169e-09	0.45458	0.522	0.286	0.000105168	0	MND1
EFCAB11	6.31151e-09	0.488333	0.628	0.411	0.000105667	0	EFCAB11
ULK1	6.39103e-09	0.299028	0.611	0.336	0.000106999	0	ULK1
RNFT2	6.50009e-09	0.284194	0.496	0.226	0.000108825	0	RNFT2
BBS4	6.70348e-09	0.391783	0.823	0.572	0.00011223	0	BBS4
BTG2	6.83441e-09	0.361694	0.708	0.401	0.000114422	0	BTG2
FAR1	7.039e-09	0.286674	0.894	0.783	0.000117847	0	FAR1
KCTD6	7.10611e-09	0.399892	0.743	0.547	0.000118971	0	KCTD6
NUP155	7.16395e-09	0.290287	0.929	0.764	0.000119939	0	NUP155
ATP8A2	7.60197e-09	0.376308	0.265	0.09	0.000127272	0	ATP8A2
ERICH5	7.87411e-09	0.29925	0.292	0.098	0.000131828	0	ERICH5
RAD51AP1	8.02891e-09	0.460265	0.619	0.392	0.00013442	0	RAD51AP1
TLE3	8.25907e-09	0.25966	0.965	0.825	0.000138273	0	TLE3
CCNB2	8.29396e-09	0.419582	0.717	0.48	0.000138858	0	CCNB2
TATDN3	8.33326e-09	0.420136	0.726	0.476	0.000139515	0	TATDN3
CEP78	8.41695e-09	0.382575	0.681	0.45	0.000140916	0	CEP78
FBXO6	8.42288e-09	0.322278	0.673	0.34	0.000141016	0	FBXO6
CHTF18	8.60924e-09	0.424483	0.575	0.324	0.000144136	0	CHTF18
BEX4	8.88104e-09	0.349519	0.858	0.652	0.000148686	0	BEX4
PALD1	8.91413e-09	0.256963	0.265	0.089	0.00014924	0	PALD1
ZNF418	9.4654e-09	0.450826	0.46	0.233	0.00015847	0	ZNF418
IMMP1L	9.55872e-09	0.366295	0.779	0.598	0.000160032	0	IMMP1L
SYNGR1	9.73757e-09	0.413934	0.637	0.375	0.000163026	0	SYNGR1
F11R	9.75657e-09	0.308329	0.982	0.768	0.000163345	0	F11R
CNKSR1	9.95546e-09	0.318222	0.478	0.215	0.000166674	0	CNKSR1
SCCPDH	9.96111e-09	0.367401	0.779	0.598	0.000166769	0	SCCPDH
C17orf49	1.0272e-08	0.267679	0.965	0.831	0.000171973	0	C17orf49
TOP3B	1.03515e-08	0.376171	0.522	0.273	0.000173305	0	TOP3B
TBC1D32	1.03888e-08	0.418119	0.664	0.452	0.00017393	0	TBC1D32
MTF2	1.04119e-08	0.257962	0.991	0.851	0.000174316	0	MTF2
ELP5	1.12802e-08	0.25494	0.991	0.851	0.000188853	0	ELP5
IDH1	1.13716e-08	0.279317	0.991	0.878	0.000190383	0	IDH1
STIM1	1.14633e-08	0.372448	0.549	0.291	0.000191919	0	STIM1
UGT3A2	1.15374e-08	0.390238	0.46	0.221	0.000193159	0	UGT3A2
QPRT	1.29661e-08	0.341182	0.894	0.52	0.000217079	0	QPRT
BCAS3	1.29701e-08	0.423141	0.619	0.369	0.000217145	0	BCAS3
BCL9	1.30159e-08	0.335998	0.558	0.307	0.000217911	0	BCL9
CRIP1	1.30159e-08	0.313489	0.814	0.517	0.000217911	0	CRIP1
TMEM144	1.32392e-08	0.399565	0.602	0.361	0.00022165	0	TMEM144
USP9Y	1.33146e-08	0.278975	0.903	0.685	0.000222913	0	USP9Y
TMSB15A	1.34415e-08	0.291525	0.761	0.502	0.000225038	0	TMSB15A
DPPA3	1.4231e-08	0.407824	0.407	0.181	0.000238255	0	DPPA3
STK35	1.43054e-08	0.296868	0.85	0.596	0.000239502	0	STK35
STAU2	1.43529e-08	0.342187	0.832	0.691	0.000240296	0	STAU2
SPSB2	1.45674e-08	0.32879	0.389	0.17	0.000243887	0	SPSB2
HSD17B14	1.45908e-08	0.373532	0.69	0.392	0.000244279	0	HSD17B14
PIAS1	1.46561e-08	0.272895	0.929	0.806	0.000245373	0	PIAS1
USP30	1.48723e-08	0.366292	0.478	0.232	0.000248991	0	USP30
TJP2	1.51644e-08	0.345966	0.85	0.66	0.000253882	0	TJP2
PRKCQ	1.5202e-08	0.348073	0.292	0.107	0.000254513	0	PRKCQ
CTSH	1.52421e-08	0.39524	0.593	0.316	0.000255183	0	CTSH
FAM103A1	1.52927e-08	0.27419	0.929	0.842	0.00025603	0	FAM103A1
PCDHB5	1.56619e-08	0.304698	0.398	0.176	0.000262211	0	PCDHB5
MYH10	1.63092e-08	0.280683	1	0.901	0.000273049	0	MYH10
TUFT1	1.67867e-08	0.349892	0.858	0.569	0.000281044	0	TUFT1
FAHD2B	1.72649e-08	0.362638	0.708	0.462	0.000289049	0	FAHD2B
ITFG1	1.7344e-08	0.327202	0.912	0.771	0.000290372	0	ITFG1
KIT	1.76259e-08	0.37057	0.637	0.346	0.000295093	0	KIT
SUPT20H	1.86406e-08	0.25834	0.965	0.852	0.000312081	0	SUPT20H
RGL3	1.87549e-08	0.317208	0.513	0.245	0.000313995	0	RGL3
CDS2	1.92884e-08	0.255053	0.965	0.852	0.000322926	0	CDS2
CPN1	1.93623e-08	0.398354	0.336	0.127	0.000324163	0	CPN1
TMEM150C	1.94594e-08	0.344925	0.726	0.42	0.00032579	0	TMEM150C
EHHADH	1.98503e-08	0.418658	0.584	0.351	0.000332334	0	EHHADH
TUB	2.15756e-08	0.367283	0.584	0.339	0.000361219	0	TUB
SMARCD1	2.19678e-08	0.283192	0.779	0.485	0.000367784	0	SMARCD1
CRYZL1	2.34833e-08	0.264533	0.947	0.803	0.000393157	0	CRYZL1
WBP1	2.35731e-08	0.328912	0.77	0.565	0.000394662	0	WBP1
RASGEF1A	2.39259e-08	0.337934	0.354	0.145	0.000400567	0	RASGEF1A
TGFB2	2.43675e-08	0.413125	0.398	0.179	0.000407961	0	TGFB2
BRCA1	2.45396e-08	0.44811	0.611	0.383	0.000410842	0	BRCA1
C4orf27	2.52852e-08	0.267078	0.867	0.791	0.000423325	0	C4orf27
KDF1	2.55399e-08	0.340913	0.46	0.223	0.00042759	0	KDF1
ST8SIA4	2.56738e-08	0.311171	0.575	0.28	0.00042983	0	ST8SIA4
NUP43	2.57301e-08	0.287668	0.956	0.755	0.000430773	0	NUP43
H1F0	2.60469e-08	0.300991	0.965	0.738	0.000436078	0	H1F0
NAALAD2	2.67264e-08	0.457249	0.469	0.247	0.000447453	0	NAALAD2
ZNF528	2.69174e-08	0.364045	0.805	0.586	0.000450652	0	ZNF528
TERF1	2.73786e-08	0.32856	0.938	0.75	0.000458372	0	TERF1
UBE3D	2.8397e-08	0.395368	0.593	0.34	0.000475423	0	UBE3D
C15orf38.AP3S2	2.85852e-08	0.301047	0.858	0.652	0.000478574	0	C15orf38.AP3S2
COL4A2	2.88725e-08	0.28496	0.929	0.815	0.000483383	0	COL4A2
C19orf25	2.98302e-08	0.356464	0.717	0.485	0.000499417	0	C19orf25
PSTPIP2	3.305e-08	0.371573	0.496	0.256	0.000553323	0	PSTPIP2
TOP2A	3.44604e-08	0.44207	0.646	0.432	0.000576937	0	TOP2A
PNMAL1	3.56763e-08	0.331776	0.381	0.169	0.000597293	0	PNMAL1
PHIP	3.93118e-08	0.255659	0.92	0.794	0.000658158	0	PHIP
THYN1	3.95788e-08	0.315887	0.938	0.717	0.000662628	0	THYN1
C20orf96	4.0229e-08	0.31136	0.602	0.367	0.000673514	0	C20orf96
C21orf58	4.04549e-08	0.285955	0.434	0.212	0.000677296	0	C21orf58
CWC27	4.0831e-08	0.295029	0.973	0.8	0.000683592	0	CWC27
UNC119	4.09966e-08	0.329149	0.796	0.571	0.000686366	0	UNC119
ZFP14	4.19334e-08	0.364982	0.522	0.282	0.000702049	0	ZFP14
SKA1	4.2289e-08	0.285843	0.619	0.408	0.000708002	0	SKA1
ZNF850	4.26346e-08	0.328742	0.575	0.324	0.000713788	0	ZNF850
PRRG3	4.33083e-08	0.364948	0.336	0.137	0.000725068	0	PRRG3
PDE10A	4.35903e-08	0.290001	0.319	0.128	0.000729788	0	PDE10A
PXYLP1	4.51822e-08	0.267632	0.487	0.232	0.00075644	0	PXYLP1
NUSAP1	4.55228e-08	0.343887	0.867	0.661	0.000762143	0	NUSAP1
PGM1	4.69102e-08	0.346822	0.796	0.613	0.00078537	0	PGM1
UBQLN4	4.79417e-08	0.353733	0.628	0.407	0.00080264	0	UBQLN4
NUDT7	4.79838e-08	0.50257	0.442	0.226	0.000803345	0	NUDT7
MTHFSD	4.80582e-08	0.400793	0.442	0.223	0.000804591	0	MTHFSD
LPAR2	4.8924e-08	0.349076	0.628	0.346	0.000819086	0	LPAR2
TRIML2	4.9666e-08	0.33649	0.442	0.203	0.000831508	0	TRIML2
NPL	5.25241e-08	0.329288	0.389	0.161	0.000879358	0	NPL
WNK3	5.29885e-08	0.333739	0.814	0.514	0.000887134	0	WNK3
KIAA1551	5.40834e-08	0.321302	0.938	0.767	0.000905464	0	KIAA1551
ARHGAP19	5.44056e-08	0.335399	0.611	0.361	0.000910859	0	ARHGAP19
SMAD4	5.52313e-08	0.35448	0.858	0.64	0.000924682	0	SMAD4
PIFO	5.55638e-08	0.410858	0.549	0.307	0.000930249	0	PIFO
RNASEH2A	5.57127e-08	0.370709	0.726	0.477	0.000932742	0	RNASEH2A
CLSTN3	6.21367e-08	0.418341	0.478	0.247	0.00104029	0	CLSTN3
ERMP1	6.23823e-08	0.338054	0.619	0.375	0.0010444	0	ERMP1
KIZ	6.27345e-08	0.388213	0.681	0.432	0.0010503	0	KIZ
FGD1	6.41226e-08	0.288181	0.487	0.262	0.00107354	0	FGD1
NUP107	7.06138e-08	0.26076	0.929	0.794	0.00118222	0	NUP107
RECK	7.26429e-08	0.342211	0.584	0.355	0.00121619	0	RECK
BAIAP2L1	7.36388e-08	0.314101	0.611	0.364	0.00123286	0	BAIAP2L1
THAP9	7.38637e-08	0.398128	0.513	0.286	0.00123663	0	THAP9
DZIP3	7.57332e-08	0.344541	0.796	0.642	0.00126793	0	DZIP3
REEP4	7.91051e-08	0.325713	0.584	0.336	0.00132438	0	REEP4
TAF9B	8.05739e-08	0.354426	0.796	0.611	0.00134897	0	TAF9B
CWF19L2	8.10273e-08	0.318157	0.779	0.526	0.00135656	0	CWF19L2
SLC25A13	8.91355e-08	0.314384	0.894	0.678	0.00149231	0	SLC25A13
RFESD	9.0877e-08	0.478676	0.354	0.16	0.00152146	0	RFESD
TRAPPC2	9.21611e-08	0.262372	0.938	0.782	0.00154296	0	TRAPPC2
SMC4	9.30816e-08	0.323399	0.912	0.732	0.00155837	0	SMC4
FUT10	9.57455e-08	0.374046	0.699	0.455	0.00160297	0	FUT10
ZRSR2	9.60848e-08	0.289592	0.841	0.693	0.00160865	0	ZRSR2
OVOL2	9.7217e-08	0.25098	0.274	0.096	0.00162761	0	OVOL2
KIAA1107	9.73687e-08	0.272778	0.257	0.092	0.00163015	0	KIAA1107
NCAPD3	1.06564e-07	0.320022	0.735	0.476	0.00178409	0	NCAPD3
SERTAD3	1.15361e-07	0.346826	0.673	0.458	0.00193138	0	SERTAD3
PLCXD2	1.15497e-07	0.269492	0.469	0.217	0.00193365	0	PLCXD2
ZNF260	1.15616e-07	0.375494	0.735	0.559	0.00193565	0	ZNF260
RFFL	1.18839e-07	0.33794	0.788	0.61	0.0019896	0	RFFL
HKR1	1.18839e-07	0.338745	0.814	0.581	0.0019896	0	HKR1
SMAD5	1.2069e-07	0.255277	0.973	0.887	0.0020206	0	SMAD5
VPS33A	1.27093e-07	0.361039	0.796	0.607	0.00212779	0	VPS33A
ANAPC4	1.29249e-07	0.396811	0.708	0.589	0.00216389	0	ANAPC4
RBM47	1.31994e-07	0.293628	0.796	0.462	0.00220985	0	RBM47
AGTRAP	1.3265e-07	0.277963	0.938	0.735	0.00222082	0	AGTRAP
ABCC4	1.33745e-07	0.366658	0.611	0.402	0.00223916	0	ABCC4
ZNF681	1.33856e-07	0.301157	0.372	0.166	0.00224101	0	ZNF681
USP51	1.3386e-07	0.278351	0.372	0.161	0.00224109	0	USP51
FAHD2A	1.40805e-07	0.333975	0.743	0.515	0.00235736	0	FAHD2A
ZNF468	1.4736e-07	0.347955	0.726	0.503	0.00246709	0	ZNF468
DLGAP1	1.4826e-07	0.31812	0.283	0.107	0.00248218	0	DLGAP1
C1orf106	1.4982e-07	0.33415	0.558	0.322	0.00250828	0	C1orf106
RARRES2	1.51054e-07	0.344367	0.407	0.185	0.00252894	0	RARRES2
FAM104B	1.51883e-07	0.308804	0.814	0.63	0.00254282	0	FAM104B
STYXL1	1.52021e-07	0.328954	0.841	0.694	0.00254513	0	STYXL1
NUDT16L1	1.55291e-07	0.342773	0.796	0.548	0.00259988	0	NUDT16L1
XRCC1	1.58896e-07	0.329047	0.717	0.521	0.00266024	0	XRCC1
SRGAP2B	1.63069e-07	0.256677	0.991	0.807	0.0027301	0	SRGAP2B
ANKRD26	1.75987e-07	0.303345	0.841	0.681	0.00294637	0	ANKRD26
H2AFV	1.75997e-07	0.250906	0.92	0.786	0.00294654	0	H2AFV
CLDN10	1.7715e-07	0.348422	0.389	0.178	0.00296585	0	CLDN10
PPP1R16A	1.80807e-07	0.292086	0.699	0.408	0.00302707	0	PPP1R16A
CCDC134	1.84115e-07	0.272555	0.283	0.107	0.00308245	0	CCDC134
C22orf39	1.86965e-07	0.297619	0.752	0.523	0.00313017	0	C22orf39
FAM169A	1.87421e-07	0.337765	0.54	0.301	0.00313781	0	FAM169A
IFT74	1.94706e-07	0.297941	0.823	0.673	0.00325977	0	IFT74
RGS16	1.95721e-07	0.28057	0.504	0.253	0.00327675	0	RGS16
RTN4IP1	1.98923e-07	0.370559	0.478	0.25	0.00333037	0	RTN4IP1
DRAM2	2.04671e-07	0.285029	0.956	0.831	0.0034266	0	DRAM2
CCS	2.06231e-07	0.338845	0.832	0.581	0.00345273	0	CCS
ANLN	2.25298e-07	0.351219	0.708	0.453	0.00377194	0	ANLN
ZNF500	2.36571e-07	0.342353	0.442	0.232	0.00396066	0	ZNF500
TCEA2	2.38778e-07	0.316326	0.796	0.581	0.00399763	0	TCEA2
GSR	2.47654e-07	0.26769	0.841	0.613	0.00414622	0	GSR
ZNF563	2.49628e-07	0.397704	0.398	0.187	0.00417927	0	ZNF563
CFAP46	2.53369e-07	0.271931	0.31	0.123	0.0042419	0	CFAP46
SSC4D	2.58006e-07	0.279265	0.301	0.117	0.00431954	0	SSC4D
CRYM	2.60396e-07	0.365799	0.496	0.259	0.00435956	0	CRYM
CTPS2	2.70598e-07	0.309151	0.814	0.575	0.00453035	0	CTPS2
TTC12	2.70649e-07	0.359942	0.389	0.185	0.00453121	0	TTC12
RNF214	2.80164e-07	0.292689	0.814	0.605	0.00469051	0	RNF214
WASF3	2.86526e-07	0.262953	0.841	0.571	0.00479701	0	WASF3
CSTF1	2.93747e-07	0.27163	0.912	0.773	0.00491791	0	CSTF1
DBF4	3.04695e-07	0.324372	0.77	0.553	0.00510121	0	DBF4
KIAA1324L	3.21447e-07	0.419791	0.575	0.357	0.00538166	0	KIAA1324L
TP53INP1	3.32464e-07	0.351101	0.743	0.557	0.00556611	0	TP53INP1
GPR107	3.48491e-07	0.328641	0.673	0.464	0.00583444	0	GPR107
SUPT3H	3.4986e-07	0.34971	0.628	0.402	0.00585736	0	SUPT3H
ST3GAL1	3.50178e-07	0.327528	0.77	0.571	0.00586269	0	ST3GAL1
TRIT1	3.51273e-07	0.34648	0.708	0.517	0.00588101	0	TRIT1
PPIC	3.54613e-07	0.254579	0.965	0.809	0.00593694	0	PPIC
NRXN3	3.68891e-07	0.28509	0.389	0.182	0.00617598	0	NRXN3
BBS7	3.70031e-07	0.333586	0.77	0.551	0.00619506	0	BBS7
ADM	3.8962e-07	0.304827	0.912	0.693	0.00652302	0	ADM
EPSTI1	3.97949e-07	0.32329	0.761	0.435	0.00666246	0	EPSTI1
LPIN2	4.05817e-07	0.260833	0.912	0.732	0.00679419	0	LPIN2
AP1G2	4.27157e-07	0.331149	0.796	0.596	0.00715146	0	AP1G2
C8orf33	4.31606e-07	0.292135	0.858	0.694	0.00722594	0	C8orf33
ZNF266	4.34284e-07	0.386753	0.619	0.407	0.00727078	0	ZNF266
PRKD1	4.358e-07	0.351395	0.469	0.247	0.00729617	0	PRKD1
UHRF1BP1	4.5081e-07	0.318307	0.513	0.316	0.00754746	0	UHRF1BP1
ESCO1	4.51495e-07	0.26637	0.929	0.837	0.00755893	0	ESCO1
BCAT2	4.65137e-07	0.267441	0.832	0.651	0.00778733	0	BCAT2
ZMIZ1	4.71617e-07	0.277005	0.858	0.64	0.00789582	0	ZMIZ1
C16orf59	4.8851e-07	0.332962	0.381	0.184	0.00817864	0	C16orf59
IQGAP3	4.96986e-07	0.254203	0.442	0.235	0.00832055	0	IQGAP3
RNF26	5.13666e-07	0.337198	0.646	0.462	0.0085998	0	RNF26
HINT3	5.46952e-07	0.354607	0.584	0.38	0.00915708	0	HINT3
PERP	5.65538e-07	0.255337	0.903	0.774	0.00946824	0	PERP
MLH3	6.16934e-07	0.326677	0.752	0.554	0.0103287	0	MLH3
ZNF738	6.22264e-07	0.282665	0.85	0.62	0.0104179	0	ZNF738
PPM1K	6.48125e-07	0.303846	0.77	0.526	0.0108509	0	PPM1K
LSR	6.58767e-07	0.286928	0.708	0.45	0.0110291	0	LSR
IQCB1	6.62262e-07	0.303071	0.788	0.651	0.0110876	0	IQCB1
GNPDA1	6.64929e-07	0.278141	0.938	0.764	0.0111322	0	GNPDA1
CIAPIN1	6.71997e-07	0.260159	0.912	0.768	0.0112506	0	CIAPIN1
NAA60	7.15089e-07	0.263832	0.903	0.738	0.011972	0	NAA60
ZNF208	7.32123e-07	0.395573	0.504	0.306	0.0122572	0	ZNF208
ZC4H2	7.42788e-07	0.382605	0.54	0.328	0.0124357	0	ZC4H2
ZBTB48	7.44705e-07	0.322574	0.504	0.276	0.0124679	0	ZBTB48
KLHL23	7.5502e-07	0.254065	0.637	0.377	0.0126406	0	KLHL23
PEX19	7.59949e-07	0.30482	0.805	0.652	0.0127231	0	PEX19
FRZB	7.81091e-07	0.265843	0.469	0.226	0.013077	0	FRZB
PDRG1	7.82599e-07	0.260703	0.867	0.688	0.0131023	0	PDRG1
TAB1	7.92481e-07	0.269222	0.442	0.232	0.0132677	0	TAB1
LYPD6	7.94852e-07	0.264889	0.345	0.157	0.0133074	0	LYPD6
CDK1	8.68593e-07	0.44624	0.593	0.396	0.014542	0	CDK1
ZNF236	8.86875e-07	0.321361	0.637	0.413	0.0148481	0	ZNF236
CENPU	8.87962e-07	0.355359	0.664	0.447	0.0148663	0	CENPU
ZNF431	9.19301e-07	0.313023	0.743	0.545	0.0153909	0	ZNF431
ZNF816	9.27062e-07	0.387934	0.407	0.212	0.0155209	0	ZNF816
ARHGAP29	9.35551e-07	0.298324	0.894	0.614	0.015663	0	ARHGAP29
DCAF16	9.41429e-07	0.265623	0.858	0.667	0.0157614	0	DCAF16
TMEM98	9.4626e-07	0.254339	0.894	0.732	0.0158423	0	TMEM98
DUS4L	9.53372e-07	0.305252	0.584	0.351	0.0159614	0	DUS4L
NOVA1	9.55868e-07	0.256857	0.301	0.125	0.0160032	0	NOVA1
CETN3	1.00787e-06	0.403258	0.717	0.578	0.0168738	0	CETN3
ANKRA2	1.01165e-06	0.316928	0.708	0.462	0.0169371	0	ANKRA2
UBE2C	1.01217e-06	0.361853	0.743	0.532	0.0169457	0	UBE2C
TRIP13	1.01296e-06	0.390218	0.584	0.387	0.016959	0	TRIP13
PPIH	1.04026e-06	0.275235	0.788	0.587	0.0174161	0	PPIH
C17orf53	1.04669e-06	0.27129	0.345	0.155	0.0175238	0	C17orf53
POLI	1.10941e-06	0.291004	0.832	0.69	0.0185737	0	POLI
APEX2	1.12435e-06	0.334688	0.646	0.437	0.0188238	0	APEX2
MGME1	1.14219e-06	0.296838	0.77	0.526	0.0191225	0	MGME1
ODC1	1.17661e-06	0.301411	0.841	0.58	0.0196988	0	ODC1
MXI1	1.20943e-06	0.329175	0.779	0.52	0.0202483	0	MXI1
SMG9	1.22532e-06	0.364686	0.619	0.413	0.0205143	0	SMG9
SH3BGR	1.24123e-06	0.356524	0.46	0.241	0.0207807	0	SH3BGR
APAF1	1.24403e-06	0.281818	0.796	0.574	0.0208275	0	APAF1
OARD1	1.24729e-06	0.281103	0.832	0.652	0.0208822	0	OARD1
ANKRD32	1.24953e-06	0.332148	0.637	0.465	0.0209196	0	ANKRD32
SLC41A3	1.28128e-06	0.33505	0.655	0.464	0.0214511	0	SLC41A3
SNRNP48	1.28973e-06	0.281426	0.717	0.515	0.0215926	0	SNRNP48
ZNF677	1.29362e-06	0.303907	0.85	0.658	0.0216578	0	ZNF677
HAUS4	1.32437e-06	0.339206	0.673	0.458	0.0221726	0	HAUS4
CCDC60	1.33398e-06	0.303735	0.257	0.098	0.0223335	0	CCDC60
CDC7	1.40373e-06	0.327364	0.584	0.372	0.0235012	0	CDC7
PDGFRA	1.40991e-06	0.329504	0.867	0.627	0.0236048	0	PDGFRA
ABCD3	1.43687e-06	0.33892	0.735	0.646	0.024056	0	ABCD3
RBP1	1.45861e-06	0.357098	0.558	0.327	0.0244201	0	RBP1
CASC5	1.48931e-06	0.387589	0.558	0.383	0.0249341	0	CASC5
NUP37	1.48988e-06	0.261726	0.832	0.705	0.0249435	0	NUP37
DLGAP5	1.49696e-06	0.407472	0.575	0.384	0.0250622	0	DLGAP5
ZNF625.ZNF20	1.52195e-06	0.350872	0.292	0.127	0.0254804	0	ZNF625.ZNF20
NEDD4L	1.5419e-06	0.29404	0.85	0.658	0.0258145	0	NEDD4L
BARD1	1.54693e-06	0.282664	0.867	0.691	0.0258987	0	BARD1
VIL1	1.55238e-06	0.271372	0.735	0.452	0.0259899	0	VIL1
TRIM2	1.56003e-06	0.283742	0.735	0.518	0.026118	0	TRIM2
STRBP	1.60524e-06	0.277723	0.805	0.554	0.0268749	0	STRBP
CENPW	1.6182e-06	0.332398	0.814	0.56	0.0270918	0	CENPW
KLHDC8B	1.65502e-06	0.306548	0.593	0.349	0.0277083	0	KLHDC8B
GSS	1.65806e-06	0.287737	0.832	0.676	0.0277592	0	GSS
ANKDD1A	1.6946e-06	0.262345	0.327	0.151	0.028371	0	ANKDD1A
FANCC	1.70703e-06	0.429382	0.381	0.205	0.028579	0	FANCC
PTTG1	1.77774e-06	0.318774	0.867	0.614	0.0297629	0	PTTG1
COPS7B	1.78085e-06	0.305814	0.717	0.592	0.0298149	0	COPS7B
METTL2A	1.82026e-06	0.262082	0.876	0.649	0.0304747	0	METTL2A
BAD	1.82652e-06	0.257218	0.885	0.777	0.0305797	0	BAD
CCNF	1.84635e-06	0.303559	0.602	0.408	0.0309116	0	CCNF
HMBS	1.93104e-06	0.300327	0.814	0.622	0.0323295	0	HMBS
PPP2R5A	1.95728e-06	0.323611	0.752	0.547	0.0327688	0	PPP2R5A
PDZK1	1.96506e-06	0.360923	0.69	0.399	0.032899	0	PDZK1
RBBP9	1.98652e-06	0.378073	0.593	0.41	0.0332584	0	RBBP9
MKS1	2.08268e-06	0.35174	0.496	0.289	0.0348682	0	MKS1
BEND5	2.09545e-06	0.299658	0.389	0.193	0.035082	0	BEND5
TMEM194A	2.09864e-06	0.321256	0.558	0.352	0.0351353	0	TMEM194A
SEPHS2	2.2133e-06	0.321695	0.779	0.598	0.037055	0	SEPHS2
ENTPD4	2.21831e-06	0.308986	0.779	0.611	0.0371389	0	ENTPD4
MITF	2.37611e-06	0.264542	0.354	0.164	0.0397808	0	MITF
UNC13B	2.49277e-06	0.310467	0.513	0.316	0.0417339	0	UNC13B
TNS3	2.4947e-06	0.284938	0.717	0.535	0.0417663	0	TNS3
PTPLB	2.58249e-06	0.29229	0.735	0.529	0.0432361	0	PTPLB
CDC20	2.63619e-06	0.348886	0.637	0.407	0.0441351	0	CDC20
TBC1D7	2.65636e-06	0.297115	0.823	0.598	0.0444727	0	TBC1D7
PDE9A	2.77587e-06	0.285988	0.549	0.313	0.0464735	0	PDE9A
LAPTM4B	2.78688e-06	0.263705	0.947	0.661	0.046658	0	LAPTM4B
L3MBTL1	2.85289e-06	0.330395	0.372	0.19	0.0477631	0	L3MBTL1
INVS	2.87639e-06	0.314569	0.531	0.31	0.0481565	0	INVS
ZNF83	3.02572e-06	0.290072	0.823	0.69	0.0506567	0	ZNF83
HIST1H4K	3.20925e-06	0.34438	0.487	0.292	0.0537293	0	HIST1H4K
C1orf210	3.25463e-06	0.269011	0.416	0.211	0.054489	0	C1orf210
DSP	3.26196e-06	0.307478	0.982	0.756	0.0546118	0	DSP
CERS4	3.28593e-06	0.267564	0.593	0.343	0.055013	0	CERS4
ACP6	3.41264e-06	0.342856	0.442	0.242	0.0571344	0	ACP6
MGST2	3.4515e-06	0.341892	0.938	0.667	0.057785	0	MGST2
TMEM67	3.47004e-06	0.35874	0.558	0.345	0.0580954	0	TMEM67
COBLL1	3.58416e-06	0.342136	0.513	0.304	0.060006	0	COBLL1
C17orf75	3.58655e-06	0.304645	0.77	0.631	0.0600459	0	C17orf75
SLC35C2	3.71763e-06	0.282176	0.761	0.631	0.0622406	0	SLC35C2
SHPK	3.80913e-06	0.278456	0.558	0.333	0.0637725	0	SHPK
PDK3	3.83359e-06	0.297178	0.575	0.352	0.0641819	0	PDK3
CHN2	4.02123e-06	0.301673	0.389	0.2	0.0673235	0	CHN2
ATF7IP	4.04289e-06	0.27409	0.823	0.727	0.0676861	0	ATF7IP
APBB1	4.11072e-06	0.303065	0.54	0.337	0.0688217	0	APBB1
PYGB	4.15178e-06	0.253006	0.867	0.705	0.0695091	0	PYGB
LRBA	4.15443e-06	0.278642	0.814	0.627	0.0695534	0	LRBA
RABL6	4.27123e-06	0.2699	0.664	0.494	0.071509	0	RABL6
ENPP5	4.27837e-06	0.312301	0.345	0.169	0.0716284	0	ENPP5
GPCPD1	4.37751e-06	0.290261	0.788	0.614	0.0732883	0	GPCPD1
KCNMB4	4.38489e-06	0.312961	0.292	0.134	0.0734119	0	KCNMB4
LIAS	4.42292e-06	0.354006	0.602	0.413	0.0740485	0	LIAS
GLMN	4.42581e-06	0.316217	0.717	0.541	0.074097	0	GLMN
SLC7A6OS	4.45432e-06	0.325338	0.673	0.467	0.0745742	0	SLC7A6OS
ZNF799	4.69054e-06	0.278413	0.363	0.182	0.078529	0	ZNF799
RNF115	4.72331e-06	0.27895	0.761	0.587	0.0790776	0	RNF115
BIN1	4.78368e-06	0.26631	0.708	0.471	0.0800885	0	BIN1
ZNF658	4.94994e-06	0.27911	0.31	0.146	0.0828719	0	ZNF658
RAD54B	4.99782e-06	0.383386	0.566	0.414	0.0836735	0	RAD54B
ZNF446	5.05091e-06	0.267176	0.301	0.136	0.0845623	0	ZNF446
TMEM254	5.13928e-06	0.331171	0.655	0.464	0.0860418	0	TMEM254
GRB14	5.3857e-06	0.322547	0.434	0.232	0.0901673	0	GRB14
FGG	5.42738e-06	0.274015	0.566	0.262	0.0908652	0	FGG
CENPF	5.43029e-06	0.327001	0.664	0.423	0.0909139	0	CENPF
STRADA	5.43899e-06	0.306765	0.619	0.432	0.0910595	0	STRADA
ZNF532	5.7404e-06	0.281504	0.814	0.639	0.0961058	0	ZNF532
ENTPD6	5.83616e-06	0.305555	0.735	0.566	0.0977091	0	ENTPD6
TSR2	6.07177e-06	0.258335	0.85	0.702	0.101654	0	TSR2
CEP76	6.24127e-06	0.355916	0.522	0.34	0.104491	0	CEP76
BCL2L12	6.62177e-06	0.257104	0.664	0.452	0.110862	0	BCL2L12
ARHGAP28	6.68185e-06	0.253598	0.496	0.279	0.111868	0	ARHGAP28
HMGCL	6.82679e-06	0.276121	0.876	0.705	0.114294	0	HMGCL
METTL10	6.83104e-06	0.320767	0.673	0.55	0.114365	0	METTL10
ZNF568	7.05925e-06	0.33045	0.637	0.447	0.118186	0	ZNF568
MIB1	7.13908e-06	0.280894	0.779	0.649	0.119522	0	MIB1
TROAP	7.24044e-06	0.341103	0.522	0.339	0.121219	0	TROAP
PREPL	7.30447e-06	0.279188	0.814	0.611	0.122291	0	PREPL
NRSN2	7.47318e-06	0.295396	0.717	0.56	0.125116	0	NRSN2
HIRIP3	7.69761e-06	0.292365	0.487	0.283	0.128873	0	HIRIP3
METTL6	7.77846e-06	0.311538	0.681	0.485	0.130227	0	METTL6
ZNF664	7.78068e-06	0.255291	0.894	0.72	0.130264	0	ZNF664
DNALI1	7.85586e-06	0.260656	0.558	0.33	0.131523	0	DNALI1
HDGFRP3	7.91058e-06	0.271855	0.903	0.727	0.132439	0	HDGFRP3
AC009133.22	8.2506e-06	0.273735	0.549	0.319	0.138131	0	AC009133.22
NINL	8.44238e-06	0.254829	0.77	0.467	0.141342	0	NINL
PTPN6	8.45423e-06	0.272679	0.381	0.196	0.141541	0	PTPN6
HIST1H4J	8.71916e-06	0.324259	0.487	0.3	0.145976	0	HIST1H4J
TTN	8.88154e-06	0.273705	0.699	0.456	0.148695	0	TTN
SLC13A4	8.94486e-06	0.262326	0.301	0.14	0.149755	0	SLC13A4
DAPK1	8.98782e-06	0.310765	0.699	0.535	0.150474	0	DAPK1
SENP7	9.25472e-06	0.302047	0.779	0.643	0.154943	0	SENP7
SOAT1	9.255e-06	0.304943	0.726	0.515	0.154947	0	SOAT1
NDNL2	9.26168e-06	0.257196	0.416	0.226	0.155059	0	NDNL2
BIRC5	9.4663e-06	0.335416	0.726	0.477	0.158485	0	BIRC5
STX3	9.49306e-06	0.290007	0.717	0.548	0.158933	0	STX3
WDYHV1	9.54213e-06	0.338197	0.681	0.467	0.159754	0	WDYHV1
OMA1	9.62471e-06	0.346047	0.593	0.393	0.161137	0	OMA1
SMC2	9.65855e-06	0.257081	0.823	0.696	0.161703	0	SMC2
SGOL1	9.81589e-06	0.339905	0.522	0.327	0.164338	0	SGOL1
SASS6	9.86025e-06	0.298349	0.566	0.393	0.16508	0	SASS6
G6PD	9.98995e-06	0.29577	0.584	0.392	0.167252	0	G6PD
MAD2L1	1.05069e-05	0.312002	0.699	0.541	0.175906	0	MAD2L1
PARP2	1.09268e-05	0.252931	0.85	0.724	0.182937	0	PARP2
PI4K2B	1.15863e-05	0.291756	0.611	0.411	0.193977	0	PI4K2B
AMT	1.18254e-05	0.278302	0.496	0.289	0.19798	0	AMT
SNRNP25	1.19511e-05	0.260893	0.85	0.657	0.200085	0	SNRNP25
ORAI1	1.19583e-05	0.264312	0.566	0.372	0.200206	0	ORAI1
FANCG	1.20212e-05	0.308888	0.522	0.339	0.201259	0	FANCG
KIAA1467	1.23118e-05	0.277329	0.717	0.515	0.206124	0	KIAA1467
PAPOLG	1.34708e-05	0.278491	0.735	0.577	0.225528	0	PAPOLG
RECQL5	1.3511e-05	0.280497	0.434	0.244	0.226201	0	RECQL5
ZNF439	1.35463e-05	0.266986	0.301	0.14	0.226791	0	ZNF439
FAM122C	1.36221e-05	0.256052	0.487	0.27	0.228061	0	FAM122C
SECISBP2	1.37737e-05	0.252192	0.841	0.703	0.230599	0	SECISBP2
PELI1	1.4116e-05	0.291635	0.646	0.458	0.236329	0	PELI1
PRSS8	1.42044e-05	0.256583	0.699	0.425	0.237809	0	PRSS8
KANK1	1.53167e-05	0.274229	0.699	0.485	0.256432	0	KANK1
A1BG	1.55528e-05	0.273065	0.708	0.509	0.260385	0	A1BG
POT1	1.598e-05	0.355932	0.611	0.464	0.267537	0	POT1
MELK	1.60371e-05	0.309533	0.619	0.437	0.268494	0	MELK
SPECC1	1.60957e-05	0.261611	0.761	0.593	0.269474	0	SPECC1
AMN1	1.68407e-05	0.311538	0.602	0.404	0.281948	0	AMN1
PPIL3	1.69344e-05	0.252824	0.85	0.755	0.283516	0	PPIL3
CAP2	1.69684e-05	0.293162	0.664	0.497	0.284085	0	CAP2
HDHD2	1.74535e-05	0.310802	0.69	0.542	0.292206	0	HDHD2
MIF4GD	1.74779e-05	0.26654	0.655	0.42	0.292615	0	MIF4GD
ZNF627	1.76772e-05	0.316267	0.496	0.309	0.295952	0	ZNF627
HMG20A	1.78761e-05	0.314091	0.69	0.545	0.299282	0	HMG20A
KLHL24	1.79005e-05	0.266055	0.796	0.613	0.299691	0	KLHL24
KRI1	1.79786e-05	0.270224	0.69	0.521	0.300998	0	KRI1
CHURC1.FNTB	1.81924e-05	0.302424	0.628	0.413	0.304577	0	CHURC1.FNTB
TMEM97	1.83569e-05	0.341686	0.885	0.608	0.307331	0	TMEM97
BST2	1.85598e-05	0.268737	0.531	0.295	0.310729	0	BST2
PQLC3	1.86055e-05	0.306723	0.699	0.52	0.311493	0	PQLC3
RBM15	1.8615e-05	0.263459	0.513	0.354	0.311652	0	RBM15
TEX10	1.86323e-05	0.310092	0.761	0.645	0.311942	0	TEX10
PIP4K2C	1.91695e-05	0.302257	0.628	0.434	0.320936	0	PIP4K2C
TSEN54	1.98913e-05	0.297231	0.487	0.298	0.333019	0	TSEN54
LRRCC1	2.01557e-05	0.359307	0.513	0.349	0.337446	0	LRRCC1
ARMC9	2.0442e-05	0.339831	0.558	0.384	0.34224	0	ARMC9
FBXO36	2.06809e-05	0.297602	0.566	0.389	0.34624	0	FBXO36
C5orf22	2.11599e-05	0.267606	0.779	0.651	0.354259	0	C5orf22
MOSPD2	2.21926e-05	0.285066	0.752	0.685	0.371548	0	MOSPD2
RAD51B	2.26452e-05	0.351289	0.496	0.319	0.379127	0	RAD51B
CXXC5	2.34028e-05	0.275467	0.743	0.515	0.391809	0	CXXC5
CBY1	2.36359e-05	0.26598	0.77	0.608	0.395713	0	CBY1
C19orf33	2.38499e-05	0.274569	0.575	0.386	0.399295	0	C19orf33
KIF3A	2.41933e-05	0.268513	0.752	0.64	0.405044	0	KIF3A
CEP19	2.44787e-05	0.278557	0.31	0.154	0.409823	0	CEP19
EED	2.52886e-05	0.296205	0.735	0.596	0.423382	0	EED
ADAL	2.54647e-05	0.324476	0.549	0.369	0.42633	0	ADAL
THOC5	2.55359e-05	0.253759	0.885	0.697	0.427522	0	THOC5
FANCI	2.56567e-05	0.295201	0.699	0.575	0.429545	0	FANCI
DNTTIP1	2.65041e-05	0.253718	0.796	0.625	0.443731	0	DNTTIP1
ZNF18	2.6548e-05	0.337166	0.389	0.223	0.444466	0	ZNF18
RUFY3	2.73719e-05	0.2954	0.788	0.637	0.45826	0	RUFY3
PRPF40B	2.83601e-05	0.27865	0.504	0.328	0.474804	0	PRPF40B
VPS8	2.88969e-05	0.271096	0.752	0.682	0.483791	0	VPS8
SATB1	2.91614e-05	0.310947	0.619	0.434	0.48822	0	SATB1
CEP97	2.93948e-05	0.3271	0.558	0.386	0.492127	0	CEP97
PCTP	2.95083e-05	0.305554	0.496	0.322	0.494028	0	PCTP
ZNF28	2.98069e-05	0.27641	0.699	0.541	0.499027	0	ZNF28
SALL4	3.0138e-05	0.275051	0.717	0.441	0.50457	0	SALL4
PROM1	3.04623e-05	0.318845	0.496	0.309	0.51	0	PROM1
INPP5F	3.12394e-05	0.282364	0.752	0.602	0.523009	0	INPP5F
DYNC2H1	3.15206e-05	0.266675	0.726	0.542	0.527717	0	DYNC2H1
CCDC150	3.21574e-05	0.300766	0.637	0.434	0.53838	0	CCDC150
DOK4	3.22775e-05	0.252756	0.504	0.307	0.54039	0	DOK4
TPK1	3.2314e-05	0.354464	0.54	0.375	0.541001	0	TPK1
ABCB8	3.25082e-05	0.298249	0.381	0.22	0.544253	0	ABCB8
PPP2R5D	3.30563e-05	0.263667	0.708	0.545	0.553429	0	PPP2R5D
RNASEH2B	3.38074e-05	0.307059	0.637	0.509	0.566003	0	RNASEH2B
BBS9	3.46479e-05	0.301696	0.681	0.485	0.580076	0	BBS9
FGA	3.46494e-05	0.269013	0.593	0.282	0.580101	0	FGA
ACTC1	3.47852e-05	0.26546	0.301	0.139	0.582374	0	ACTC1
ZNF14	3.50291e-05	0.370045	0.425	0.258	0.586457	0	ZNF14
PLA2G12B	3.55235e-05	0.271866	0.504	0.273	0.594734	0	PLA2G12B
AP3S2	3.61325e-05	0.250649	0.805	0.678	0.60493	0	AP3S2
EPB41L5	3.62747e-05	0.315581	0.593	0.441	0.607311	0	EPB41L5
CDC25C	3.6367e-05	0.306466	0.434	0.267	0.608857	0	CDC25C
C3orf67	3.66905e-05	0.306089	0.354	0.194	0.614272	0	C3orf67
UTP18	3.69041e-05	0.279993	0.743	0.634	0.617849	0	UTP18
TPX2	3.71803e-05	0.302215	0.655	0.485	0.622473	0	TPX2
CYB5R2	3.73741e-05	0.272582	0.522	0.331	0.625718	0	CYB5R2
RAB17	3.73879e-05	0.252051	0.779	0.488	0.625948	0	RAB17
TBC1D31	3.73913e-05	0.310467	0.558	0.377	0.626006	0	TBC1D31
PABPC1L	3.76506e-05	0.26191	0.602	0.402	0.630346	0	PABPC1L
CABIN1	3.79576e-05	0.254999	0.708	0.542	0.635486	0	CABIN1
VPS54	4.01975e-05	0.307629	0.602	0.44	0.672987	0	VPS54
SCRN2	4.02213e-05	0.302639	0.46	0.283	0.673385	0	SCRN2
GINS2	4.11038e-05	0.271456	0.699	0.419	0.68816	0	GINS2
HHEX	4.59961e-05	0.282792	0.558	0.34	0.770067	0	HHEX
PLCG1	4.72254e-05	0.266862	0.743	0.536	0.790648	0	PLCG1
RCAN3	4.86422e-05	0.278999	0.575	0.381	0.814368	0	RCAN3
CDADC1	4.87185e-05	0.313646	0.54	0.378	0.815645	0	CDADC1
TTC14	4.97675e-05	0.297628	0.779	0.672	0.833208	0	TTC14
KDELC1	5.03289e-05	0.281611	0.504	0.34	0.842606	0	KDELC1
TBC1D5	5.04876e-05	0.26595	0.796	0.664	0.845263	0	TBC1D5
BLMH	5.24991e-05	0.253793	0.761	0.586	0.878941	0	BLMH
FAM19A4	5.25104e-05	0.308144	0.274	0.133	0.87913	0	FAM19A4
UBN2	5.94023e-05	0.253015	0.699	0.547	0.994513	0	UBN2
B4GALT6	6.05542e-05	0.330612	0.487	0.331	1	0	B4GALT6
TMEM56	6.49447e-05	0.331591	0.46	0.285	1	0	TMEM56
ZNF625	6.55474e-05	0.281625	0.522	0.357	1	0	ZNF625
ATF7IP2	6.77222e-05	0.313389	0.619	0.438	1	0	ATF7IP2
TTK	6.85476e-05	0.373407	0.442	0.297	1	0	TTK
STX17	6.96795e-05	0.267292	0.752	0.574	1	0	STX17
PFKM	7.08945e-05	0.269126	0.699	0.53	1	0	PFKM
RNF135	7.12543e-05	0.271284	0.425	0.256	1	0	RNF135
BIVM	7.23368e-05	0.294963	0.593	0.426	1	0	BIVM
CNTRL	7.27637e-05	0.259402	0.619	0.455	1	0	CNTRL
ZNF724P	7.34558e-05	0.345123	0.398	0.241	1	0	ZNF724P
GATSL3	7.40818e-05	0.286398	0.584	0.381	1	0	GATSL3
DCLRE1A	7.46333e-05	0.291502	0.381	0.227	1	0	DCLRE1A
PRKCI	7.51591e-05	0.289543	0.796	0.617	1	0	PRKCI
LNX1	7.63768e-05	0.260838	0.398	0.252	1	0	LNX1
ZC3H6	7.64984e-05	0.27053	0.442	0.274	1	0	ZC3H6
FUNDC1	7.68939e-05	0.272026	0.699	0.569	1	0	FUNDC1
VRK1	7.84511e-05	0.279214	0.752	0.583	1	0	VRK1
VIPAS39	7.99591e-05	0.280375	0.628	0.452	1	0	VIPAS39
SLC4A8	8.07043e-05	0.280044	0.496	0.31	1	0	SLC4A8
PEX1	8.18534e-05	0.290592	0.681	0.538	1	0	PEX1
CENPQ	8.28249e-05	0.315561	0.487	0.328	1	0	CENPQ
EIF2D	8.28896e-05	0.269588	0.628	0.486	1	0	EIF2D
ZNF660	8.32678e-05	0.257007	0.451	0.276	1	0	ZNF660
PISD	8.37628e-05	0.261991	0.717	0.572	1	0	PISD
PPP2R1B	8.55512e-05	0.280417	0.77	0.643	1	0	PPP2R1B
ZNF347	8.80763e-05	0.281991	0.487	0.319	1	0	ZNF347
GPAM	8.96696e-05	0.289115	0.611	0.479	1	0	GPAM
ZNF700	9.27701e-05	0.347464	0.407	0.258	1	0	ZNF700
RAB3IP	9.48866e-05	0.287114	0.681	0.506	1	0	RAB3IP
NUF2	9.50512e-05	0.356025	0.469	0.336	1	0	NUF2
TOPBP1	0.000101842	0.261949	0.77	0.64	1	0	TOPBP1
ANKRD46	0.000104927	0.261942	0.628	0.452	1	0	ANKRD46
ALMS1	0.000105432	0.25528	0.611	0.435	1	0	ALMS1
PGAP1	0.000107649	0.314053	0.558	0.404	1	0	PGAP1
SFR1	0.000108284	0.274617	0.593	0.429	1	0	SFR1
PDE5A	0.000109673	0.253112	0.779	0.667	1	0	PDE5A
HDAC8	0.000111013	0.274077	0.681	0.526	1	0	HDAC8
FKBP1B	0.000111665	0.309531	0.442	0.283	1	0	FKBP1B
ZNF766	0.000112266	0.253986	0.752	0.572	1	0	ZNF766
MKL2	0.000113363	0.271787	0.743	0.596	1	0	MKL2
PHTF2	0.00011893	0.263023	0.673	0.517	1	0	PHTF2
FAM172A	0.000119794	0.259287	0.743	0.684	1	0	FAM172A
BUB1	0.000124555	0.290434	0.575	0.417	1	0	BUB1
KLHL12	0.000125409	0.261837	0.735	0.592	1	0	KLHL12
MCM8	0.000128788	0.312646	0.513	0.361	1	0	MCM8
MORN4	0.000128963	0.273191	0.513	0.354	1	0	MORN4
NUBPL	0.000129676	0.2547	0.637	0.459	1	0	NUBPL
NUDT12	0.000129685	0.273468	0.504	0.337	1	0	NUDT12
CYFIP2	0.00013023	0.259035	0.487	0.309	1	0	CYFIP2
ABCB7	0.000133581	0.253325	0.77	0.563	1	0	ABCB7
CDPF1	0.000148908	0.323801	0.478	0.324	1	0	CDPF1
ZNF519	0.000150931	0.293294	0.407	0.258	1	0	ZNF519
POMT1	0.000151774	0.270268	0.54	0.366	1	0	POMT1
IFT57	0.000154746	0.263868	0.823	0.684	1	0	IFT57
BLM	0.000167526	0.308693	0.496	0.339	1	0	BLM
ARHGAP19.SLIT1	0.000167655	0.256068	0.407	0.253	1	0	ARHGAP19.SLIT1
QPCT	0.000174601	0.259475	0.637	0.446	1	0	QPCT
R3HCC1L	0.000178685	0.306499	0.575	0.447	1	0	R3HCC1L
FAM161A	0.000178864	0.298497	0.513	0.377	1	0	FAM161A
MUTYH	0.00017992	0.268983	0.496	0.325	1	0	MUTYH
SPTLC3	0.000183877	0.312612	0.504	0.31	1	0	SPTLC3
FRA10AC1	0.000189457	0.253965	0.788	0.64	1	0	FRA10AC1
HENMT1	0.000198078	0.284276	0.372	0.223	1	0	HENMT1
CCDC126	0.00019826	0.262267	0.646	0.488	1	0	CCDC126
RBL1	0.000200758	0.275618	0.54	0.387	1	0	RBL1
C2orf43	0.000202877	0.265577	0.575	0.413	1	0	C2orf43
ZNF443	0.000213216	0.356608	0.363	0.224	1	0	ZNF443
RARB	0.000218181	0.274233	0.487	0.321	1	0	RARB
SPA17	0.000225194	0.287376	0.451	0.292	1	0	SPA17
COQ5	0.000225966	0.252228	0.752	0.617	1	0	COQ5
TRMT10A	0.000240023	0.258542	0.549	0.389	1	0	TRMT10A
INTS8	0.000255837	0.259827	0.735	0.557	1	0	INTS8
CTD.2116N17.1	0.000272396	0.29986	0.381	0.244	1	0	CTD.2116N17.1
ELAC1	0.000277452	0.264138	0.372	0.223	1	0	ELAC1
RAD54L	0.000294826	0.2648	0.478	0.319	1	0	RAD54L
NBPF1	0.000311531	0.26733	0.655	0.581	1	0	NBPF1
FAM173B	0.00035409	0.272914	0.513	0.355	1	0	FAM173B
TCEANC	0.000357333	0.281084	0.274	0.149	1	0	TCEANC
CKAP2L	0.00036777	0.291003	0.434	0.294	1	0	CKAP2L
PRMT9	0.00037414	0.283227	0.451	0.3	1	0	PRMT9
PRIM1	0.000388664	0.288517	0.566	0.405	1	0	PRIM1
RTTN	0.000409375	0.261918	0.451	0.31	1	0	RTTN
SERPINI1	0.000409695	0.282382	0.478	0.316	1	0	SERPINI1
FAM213A	0.000416637	0.26655	0.973	0.73	1	0	FAM213A
NFS1	0.000436105	0.273798	0.575	0.431	1	0	NFS1
UBXN2B	0.000443634	0.2757	0.549	0.413	1	0	UBXN2B
TRMT1L	0.000512084	0.270717	0.602	0.459	1	0	TRMT1L
ZFP62	0.000564503	0.257175	0.558	0.401	1	0	ZFP62
INTS4	0.000579519	0.252227	0.655	0.503	1	0	INTS4
GIT2	0.00059227	0.272397	0.54	0.432	1	0	GIT2
MYO5B	0.000594586	0.287406	0.451	0.303	1	0	MYO5B
TYW5	0.000628056	0.257617	0.611	0.506	1	0	TYW5
GPD2	0.000643329	0.27941	0.584	0.474	1	0	GPD2
WWP2	0.000649189	0.289605	0.496	0.375	1	0	WWP2
ZWILCH	0.00068296	0.250184	0.726	0.548	1	0	ZWILCH
MT1G	0.000690048	0.272175	0.327	0.187	1	0	MT1G
ALDH1A1	0.000696121	0.269009	0.496	0.319	1	0	ALDH1A1
ETAA1	0.000756933	0.302493	0.566	0.458	1	0	ETAA1
DPY19L4	0.000778174	0.278416	0.602	0.464	1	0	DPY19L4
FANCB	0.000821079	0.287922	0.531	0.398	1	0	FANCB
ZFP82	0.000833383	0.260676	0.478	0.34	1	0	ZFP82
KIAA0101	0.000882671	0.265866	0.743	0.503	1	0	KIAA0101
CLGN	0.000886839	0.252107	0.257	0.14	1	0	CLGN
ZNF101	0.000892186	0.253124	0.487	0.33	1	0	ZNF101
ZNF253	0.00116726	0.262415	0.469	0.327	1	0	ZNF253
COQ3	0.00116879	0.300613	0.487	0.364	1	0	COQ3
NEK3	0.001249	0.291009	0.531	0.423	1	0	NEK3
C1orf50	0.00130541	0.255254	0.513	0.392	1	0	C1orf50
ZNF302	0.00134534	0.273935	0.575	0.477	1	0	ZNF302
C11orf65	0.00153328	0.250904	0.265	0.154	1	0	C11orf65
SAMD12	0.00166616	0.283364	0.504	0.402	1	0	SAMD12
KIF11	0.00179237	0.250974	0.451	0.331	1	0	KIF11
ZNF433	0.00181812	0.317726	0.319	0.208	1	0	ZNF433
CLDN12	0.00203916	0.257869	0.611	0.532	1	0	CLDN12
SLC38A9	0.00214041	0.251623	0.602	0.502	1	0	SLC38A9
PCCA	0.00226922	0.283874	0.637	0.545	1	0	PCCA
NIPAL1	0.00329187	0.252224	0.327	0.22	1	0	NIPAL1
ZNF404	0.0034795	0.32276	0.319	0.211	1	0	ZNF404
KIF2C	0.00348861	0.250638	0.416	0.319	1	0	KIF2C
METTL4	0.00431406	0.252212	0.46	0.361	1	0	METTL4
ZNF823	0.00508801	0.289619	0.345	0.252	1	0	ZNF823
METTL18	0.00544935	0.272612	0.434	0.361	1	0	METTL18
CEP162	0.00603294	0.262953	0.504	0.407	1	0	CEP162
GIN1	0.00830311	0.259094	0.336	0.233	1	0	GIN1
NCAPG	0.0099829	0.264506	0.46	0.378	1	0	NCAPG
GALNT5	2.022e-131	1.40351	0.955	0.028	3.38524e-127	1	GALNT5
KCNK2	3.46905e-119	1.39979	0.886	0.026	5.80789e-115	1	KCNK2
KRTAP1.5	9.45375e-106	0.936345	0.761	0.017	1.58275e-101	1	KRTAP1.5
CD248	7.4511e-104	1.36311	0.955	0.067	1.24746e-99	1	CD248
CXCL12	5.15178e-100	1.69397	1	0.099	8.6251e-96	1	CXCL12
EBF1	3.19008e-98	1.56048	0.977	0.087	5.34083e-94	1	EBF1
FAP	5.74095e-96	1.6049	0.977	0.086	9.61151e-92	1	FAP
ZFHX4	3.2012e-95	1.27784	0.989	0.096	5.35945e-91	1	ZFHX4
MFAP5	1.16663e-92	1.69292	0.955	0.089	1.95317e-88	1	MFAP5
ITGBL1	2.56027e-92	1.49937	0.955	0.093	4.2864e-88	1	ITGBL1
PSG5	5.13269e-87	1.36198	0.75	0.035	8.59315e-83	1	PSG5
HSPB7	6.5416e-87	0.77099	0.636	0.015	1.0952e-82	1	HSPB7
COL12A1	9.64056e-87	1.41493	0.966	0.115	1.61402e-82	1	COL12A1
NPR3	2.02326e-86	1.34754	0.966	0.1	3.38734e-82	1	NPR3
FGF7	1.06154e-85	1.88767	0.909	0.096	1.77722e-81	1	FGF7
VGLL3	2.07259e-85	1.23213	0.92	0.094	3.46993e-81	1	VGLL3
GPR1	2.12609e-82	1.25257	0.83	0.061	3.55949e-78	1	GPR1
POSTN	4.07743e-82	1.62456	0.864	0.075	6.82643e-78	1	POSTN
ISLR	3.90167e-81	1.04972	0.807	0.055	6.53217e-77	1	ISLR
COL3A1	5.08361e-81	1.50204	1	0.12	8.51097e-77	1	COL3A1
CEMIP	2.46465e-79	1.40798	0.886	0.1	4.12631e-75	1	CEMIP
LUM	4.53112e-79	1.79297	0.989	0.145	7.58601e-75	1	LUM
ITGA11	5.3721e-77	1.13248	0.864	0.091	8.99398e-73	1	ITGA11
ADAM12	3.14562e-76	1.24715	0.932	0.125	5.2664e-72	1	ADAM12
SCUBE3	1.03705e-75	1.69592	0.943	0.144	1.73622e-71	1	SCUBE3
COPZ2	2.07369e-73	1.16669	0.795	0.073	3.47177e-69	1	COPZ2
BICC1	2.44709e-73	1.70514	1	0.202	4.09692e-69	1	BICC1
LOXL1	3.87915e-73	1.39873	0.966	0.16	6.49447e-69	1	LOXL1
MAP1A	1.72304e-72	1.18413	0.989	0.193	2.88472e-68	1	MAP1A
SULF1	1.82661e-72	1.53887	0.977	0.152	3.05811e-68	1	SULF1
ALPK2	6.05887e-70	1.05685	0.875	0.109	1.01438e-65	1	ALPK2
LTBP2	7.37908e-70	1.26051	1	0.215	1.23541e-65	1	LTBP2
GLT8D2	8.70223e-70	1.09998	0.761	0.071	1.45693e-65	1	GLT8D2
ITGA8	1.89097e-68	0.991519	0.659	0.042	3.16586e-64	1	ITGA8
ACTA2	3.59586e-68	1.58664	0.92	0.145	6.0202e-64	1	ACTA2
CDH11	8.77111e-68	1.42363	1	0.194	1.46846e-63	1	CDH11
SNAI2	2.17263e-67	1.0813	0.852	0.096	3.63741e-63	1	SNAI2
PRRX1	2.80879e-67	1.24356	0.977	0.139	4.70248e-63	1	PRRX1
SEMA3C	3.85742e-67	1.24172	0.864	0.122	6.45809e-63	1	SEMA3C
CRYAB	1.97957e-66	1.49996	1	0.215	3.3142e-62	1	CRYAB
GREM1	7.01839e-66	0.70133	0.591	0.032	1.17502e-61	1	GREM1
C11orf87	1.01173e-65	0.601959	0.545	0.02	1.69384e-61	1	C11orf87
PDE1C	3.20242e-65	1.14249	0.852	0.122	5.36149e-61	1	PDE1C
ADAMTS2	1.06845e-64	0.879273	0.875	0.106	1.7888e-60	1	ADAMTS2
DSEL	1.57029e-64	0.649342	0.966	0.197	2.62897e-60	1	DSEL
THY1	2.01459e-64	1.35127	0.966	0.194	3.37282e-60	1	THY1
EPHA5	2.89828e-64	0.691853	0.489	0.013	4.8523e-60	1	EPHA5
HAPLN1	6.55116e-64	1.21503	0.67	0.052	1.0968e-59	1	HAPLN1
FGF5	8.6298e-64	1.15778	0.807	0.091	1.4448e-59	1	FGF5
MXRA8	1.27573e-63	1.28413	1	0.226	2.13583e-59	1	MXRA8
INHBA	8.88111e-63	1.32257	0.989	0.219	1.48688e-58	1	INHBA
TMEM119	1.92757e-62	0.645495	0.568	0.028	3.22713e-58	1	TMEM119
DGKI	2.21276e-62	0.896703	0.761	0.077	3.7046e-58	1	DGKI
FAM19A5	2.39908e-62	0.546371	0.557	0.026	4.01654e-58	1	FAM19A5
LMOD1	3.19098e-62	0.649359	0.602	0.039	5.34234e-58	1	LMOD1
EDIL3	3.84394e-62	1.4369	0.989	0.286	6.43552e-58	1	EDIL3
PSG2	6.08348e-62	0.52478	0.534	0.022	1.0185e-57	1	PSG2
FBN1	9.85299e-62	1.41943	1	0.276	1.64959e-57	1	FBN1
NTM	5.6952e-61	1.09116	0.784	0.102	9.53491e-57	1	NTM
HTRA1	3.81325e-60	1.30471	0.966	0.196	6.38415e-56	1	HTRA1
PDGFRB	4.28704e-60	1.12257	0.932	0.141	7.17737e-56	1	PDGFRB
COL1A1	1.81252e-59	1.56323	1	0.36	3.03452e-55	1	COL1A1
COL1A2	2.51067e-59	1.65099	1	0.347	4.20337e-55	1	COL1A2
EBF3	2.72728e-59	0.570624	0.568	0.033	4.56601e-55	1	EBF3
ELN	5.02117e-59	0.887921	0.739	0.077	8.40644e-55	1	ELN
ARID5B	1.5292e-58	1.43977	1	0.287	2.56019e-54	1	ARID5B
ADAMTS1	2.42827e-58	1.32311	0.989	0.289	4.06541e-54	1	ADAMTS1
HOXC10	3.62912e-58	0.871733	0.784	0.087	6.07587e-54	1	HOXC10
NFIX	7.87146e-58	0.857051	0.682	0.067	1.31784e-53	1	NFIX
SLC8A1	1.13621e-57	0.832163	0.682	0.067	1.90224e-53	1	SLC8A1
RAB7B	1.23273e-57	0.71137	0.489	0.019	2.06383e-53	1	RAB7B
CCDC80	4.80648e-57	1.49944	1	0.358	8.04701e-53	1	CCDC80
ABCA8	1.21323e-56	0.713017	0.455	0.015	2.03119e-52	1	ABCA8
TNFRSF11B	1.37271e-56	1.2692	0.648	0.065	2.29819e-52	1	TNFRSF11B
WNT5B	1.50815e-56	0.866417	0.773	0.097	2.52495e-52	1	WNT5B
KCNMA1	3.89587e-56	0.872242	0.659	0.065	6.52247e-52	1	KCNMA1
CYP1B1	5.52855e-56	1.36124	0.955	0.245	9.25589e-52	1	CYP1B1
MSRB3	6.57637e-56	1.22762	1	0.254	1.10102e-51	1	MSRB3
GLIPR1	8.66228e-56	1.39331	1	0.443	1.45024e-51	1	GLIPR1
PENK	1.30941e-55	1.26491	0.614	0.055	2.19222e-51	1	PENK
OLFML3	1.93636e-55	1.25331	1	0.295	3.24185e-51	1	OLFML3
COL6A3	4.73555e-55	1.31936	1	0.176	7.92826e-51	1	COL6A3
TNC	5.2799e-55	1.1574	1	0.21	8.83961e-51	1	TNC
FGF1	1.21732e-54	0.926419	0.545	0.036	2.03803e-50	1	FGF1
BDKRB1	8.51976e-54	0.971488	0.625	0.054	1.42638e-49	1	BDKRB1
CSRP1	1.73826e-53	1.16872	1	0.345	2.9102e-49	1	CSRP1
ADIRF	3.77595e-53	1.27635	0.977	0.241	6.3217e-49	1	ADIRF
RGS4	4.8838e-53	1.32317	0.864	0.174	8.17646e-49	1	RGS4
EPDR1	1.01682e-52	0.754344	0.625	0.058	1.70235e-48	1	EPDR1
TIMP3	2.15174e-52	1.3487	0.955	0.267	3.60244e-48	1	TIMP3
ANTXR1	2.55315e-52	1.05863	0.955	0.239	4.27449e-48	1	ANTXR1
RBMS3	2.68731e-52	1.30194	1	0.37	4.4991e-48	1	RBMS3
PCDH18	3.13386e-52	0.96813	0.841	0.148	5.2467e-48	1	PCDH18
ERMN	1.50525e-51	0.845562	0.477	0.025	2.52009e-47	1	ERMN
IGFBP7	1.67701e-51	1.27511	1	0.334	2.80765e-47	1	IGFBP7
DDAH1	1.97165e-51	1.23427	1	0.459	3.30094e-47	1	DDAH1
PSG3	3.90541e-51	0.335021	0.443	0.017	6.53843e-47	1	PSG3
FHL2	4.14695e-51	1.1822	1	0.457	6.94282e-47	1	FHL2
CLEC3B	4.25875e-51	0.599404	0.534	0.039	7.13e-47	1	CLEC3B
HOXC8	2.36454e-50	0.352497	0.398	0.012	3.95872e-46	1	HOXC8
C10orf54	2.49501e-50	0.892952	0.705	0.093	4.17715e-46	1	C10orf54
EPS8	3.06255e-50	1.22133	1	0.295	5.12732e-46	1	EPS8
PLAC9	3.64031e-50	0.963474	0.864	0.173	6.09461e-46	1	PLAC9
PTRF	5.20321e-50	1.10087	1	0.405	8.71122e-46	1	PTRF
LMO7	5.2132e-50	1.2399	1	0.456	8.72794e-46	1	LMO7
NT5E	7.26264e-50	1.08612	0.966	0.239	1.21591e-45	1	NT5E
PRUNE2	2.49652e-49	1.09514	0.932	0.254	4.17967e-45	1	PRUNE2
SIX1	2.77172e-49	0.614682	0.545	0.042	4.64042e-45	1	SIX1
NAV3	2.79534e-49	1.10723	0.898	0.202	4.67996e-45	1	NAV3
TWIST1	4.90129e-49	0.62224	0.83	0.119	8.20574e-45	1	TWIST1
TRPC4	7.85926e-49	0.959318	0.693	0.099	1.3158e-44	1	TRPC4
IFI30	8.32654e-49	1.12228	0.977	0.308	1.39403e-44	1	IFI30
FAM180A	1.04939e-48	0.959865	0.602	0.062	1.75689e-44	1	FAM180A
CCBE1	1.05354e-48	0.91782	0.75	0.115	1.76383e-44	1	CCBE1
WNT5A	1.41771e-48	0.864834	0.989	0.261	2.37354e-44	1	WNT5A
COL8A1	1.89747e-48	1.11197	0.966	0.225	3.17675e-44	1	COL8A1
FRMD6	2.0018e-48	1.10936	1	0.456	3.35142e-44	1	FRMD6
CDH6	2.75197e-48	0.943287	0.75	0.115	4.60734e-44	1	CDH6
TAGLN	6.10994e-48	1.12555	1	0.633	1.02293e-43	1	TAGLN
LMO7DN	9.05508e-48	0.372604	0.398	0.015	1.516e-43	1	LMO7DN
CYBRD1	1.00055e-47	1.06557	0.966	0.264	1.67511e-43	1	CYBRD1
ARSB	1.09078e-47	0.973942	0.989	0.447	1.82618e-43	1	ARSB
LIMCH1	1.19123e-47	1.18574	0.784	0.154	1.99436e-43	1	LIMCH1
ALDH1L2	1.57514e-47	0.953044	0.841	0.168	2.63709e-43	1	ALDH1L2
DDR2	1.74987e-47	1.09468	1	0.289	2.92963e-43	1	DDR2
AXL	2.89034e-47	1.10879	1	0.618	4.83901e-43	1	AXL
LHFP	3.46689e-47	1.06935	0.955	0.267	5.80427e-43	1	LHFP
TBX15	4.79824e-47	0.975203	0.739	0.102	8.03322e-43	1	TBX15
IGFBP3	6.41508e-47	1.26466	0.977	0.276	1.07401e-42	1	IGFBP3
PRR16	7.70345e-47	0.653273	0.602	0.065	1.28971e-42	1	PRR16
IGFBP4	1.05449e-46	1.10693	1	0.567	1.76543e-42	1	IGFBP4
DOCK5	1.06801e-46	0.998993	1	0.734	1.78806e-42	1	DOCK5
DCN	2.28383e-46	1.50224	1	0.284	3.82359e-42	1	DCN
PTX3	2.69899e-46	1.25521	0.955	0.254	4.51864e-42	1	PTX3
FSTL1	2.95145e-46	0.773193	1	0.804	4.94132e-42	1	FSTL1
CTGF	3.14901e-46	1.22177	0.989	0.435	5.27207e-42	1	CTGF
LIX1L	3.40327e-46	1.03972	1	0.324	5.69776e-42	1	LIX1L
SAMD9L	4.85969e-46	0.89423	0.705	0.109	8.1361e-42	1	SAMD9L
VEGFC	5.0867e-46	0.901813	0.75	0.129	8.51615e-42	1	VEGFC
PCOLCE	1.1705e-45	1.06952	1	0.309	1.95966e-41	1	PCOLCE
LDB2	1.61831e-45	1.1088	0.92	0.237	2.70938e-41	1	LDB2
THBS1	2.31261e-45	1.26079	1	0.383	3.87177e-41	1	THBS1
SLIT2	2.44213e-45	0.965773	0.955	0.27	4.08861e-41	1	SLIT2
PDGFC	2.69345e-45	1.08855	0.989	0.396	4.50937e-41	1	PDGFC
TGFBI	5.15658e-45	1.46773	1	0.35	8.63315e-41	1	TGFBI
CFH	7.10306e-45	1.0238	0.716	0.12	1.18919e-40	1	CFH
CLMP	7.29595e-45	1.12858	1	0.341	1.22149e-40	1	CLMP
OLFML2B	1.10016e-44	0.732595	0.455	0.03	1.84189e-40	1	OLFML2B
NTN4	1.5811e-44	1.10869	0.92	0.283	2.64707e-40	1	NTN4
ALDH3B1	1.74482e-44	0.684303	0.58	0.062	2.92118e-40	1	ALDH3B1
PTGES	1.97851e-44	0.708704	0.682	0.084	3.31242e-40	1	PTGES
NEK7	2.41308e-44	1.10805	0.955	0.428	4.03997e-40	1	NEK7
THBS2	2.6551e-44	0.958934	0.705	0.115	4.44517e-40	1	THBS2
ACAN	3.11201e-44	1.16184	0.75	0.145	5.21013e-40	1	ACAN
CFHR1	5.614e-44	0.451987	0.489	0.039	9.39895e-40	1	CFHR1
FGF14	6.88971e-44	0.356127	0.489	0.038	1.15348e-39	1	FGF14
FKBP9	1.09815e-43	0.68595	1	0.894	1.83852e-39	1	FKBP9
CA12	1.2404e-43	0.896021	0.955	0.202	2.07667e-39	1	CA12
SLC14A1	2.40956e-43	0.772433	0.398	0.02	4.03408e-39	1	SLC14A1
MR1	3.38262e-43	0.757263	0.58	0.068	5.66318e-39	1	MR1
MAP1B	4.65328e-43	0.717894	1	0.792	7.79053e-39	1	MAP1B
LURAP1L	5.6817e-43	0.547917	0.489	0.039	9.51231e-39	1	LURAP1L
ALCAM	8.54586e-43	0.877561	1	0.697	1.43075e-38	1	ALCAM
CDC42EP3	8.61931e-43	1.01517	0.989	0.512	1.44305e-38	1	CDC42EP3
CALD1	1.67355e-42	0.541425	1	0.99	2.80185e-38	1	CALD1
ENG	1.92729e-42	0.999863	0.977	0.271	3.22667e-38	1	ENG
CERCAM	2.0266e-42	0.932046	0.92	0.257	3.39294e-38	1	CERCAM
FKBP7	2.46174e-42	1.03222	0.977	0.373	4.12145e-38	1	FKBP7
TIMP2	2.75653e-42	0.959282	0.989	0.39	4.61498e-38	1	TIMP2
FMN2	4.0888e-42	1.11369	0.795	0.187	6.84547e-38	1	FMN2
GBP1	4.24718e-42	1.03529	0.909	0.247	7.11063e-38	1	GBP1
CFL2	4.53429e-42	0.901242	1	0.675	7.59131e-38	1	CFL2
PPP1R3C	5.30651e-42	0.933102	0.557	0.064	8.88416e-38	1	PPP1R3C
TPM1	6.83608e-42	0.528812	1	0.951	1.1445e-37	1	TPM1
CBX6	9.98948e-42	0.774088	1	0.524	1.67244e-37	1	CBX6
PRKCA	1.57609e-41	0.95111	0.943	0.358	2.63869e-37	1	PRKCA
CRIM1	1.6129e-41	0.699287	1	0.66	2.70032e-37	1	CRIM1
DAAM2	2.08158e-41	0.430397	0.42	0.028	3.48498e-37	1	DAAM2
COL16A1	2.44766e-41	0.611837	0.58	0.07	4.09787e-37	1	COL16A1
COTL1	3.93403e-41	0.922647	1	0.512	6.58635e-37	1	COTL1
NEK10	3.94957e-41	0.958732	0.648	0.109	6.61238e-37	1	NEK10
IGFBP6	5.34735e-41	1.03701	1	0.415	8.95254e-37	1	IGFBP6
BDNF	5.81473e-41	0.792305	0.591	0.087	9.73502e-37	1	BDNF
PALLD	6.25468e-41	0.904324	1	0.66	1.04716e-36	1	PALLD
NEGR1	7.30188e-41	0.717017	0.625	0.089	1.22248e-36	1	NEGR1
ITGB1	1.25105e-40	0.497949	1	0.983	2.09451e-36	1	ITGB1
NUPR1	1.54008e-40	1.08517	0.966	0.255	2.57841e-36	1	NUPR1
FAM171B	1.79841e-40	0.832556	1	0.656	3.0109e-36	1	FAM171B
C1orf198	2.20454e-40	0.852729	1	0.698	3.69084e-36	1	C1orf198
COL5A1	4.09745e-40	0.875104	0.989	0.316	6.85995e-36	1	COL5A1
POLR2L	6.83798e-40	0.437875	0.989	0.942	1.14481e-35	1	POLR2L
LIMA1	9.04524e-40	0.616454	1	0.839	1.51435e-35	1	LIMA1
STC2	1.08534e-39	0.932196	0.955	0.298	1.81708e-35	1	STC2
MMP2	1.79549e-39	1.08302	1	0.446	3.00601e-35	1	MMP2
COL5A2	2.90619e-39	0.956961	0.977	0.45	4.86555e-35	1	COL5A2
MBNL1	3.79508e-39	0.984862	1	0.491	6.35372e-35	1	MBNL1
SLC4A4	3.84681e-39	0.600575	0.489	0.049	6.44033e-35	1	SLC4A4
GPX8	4.87085e-39	0.776065	1	0.669	8.15477e-35	1	GPX8
SPOCD1	4.90544e-39	0.924527	0.886	0.25	8.21269e-35	1	SPOCD1
SPOCK1	6.01306e-39	0.978199	0.955	0.332	1.00671e-34	1	SPOCK1
REEP3	7.75584e-39	0.730942	1	0.766	1.29848e-34	1	REEP3
DCBLD2	1.11381e-38	0.818072	1	0.679	1.86474e-34	1	DCBLD2
VASN	2.61813e-38	0.32628	0.67	0.113	4.38328e-34	1	VASN
EHD2	3.3056e-38	0.866595	1	0.385	5.53423e-34	1	EHD2
CYR61	3.59737e-38	0.958488	0.966	0.428	6.02271e-34	1	CYR61
ZEB2	4.97721e-38	0.8847	0.943	0.257	8.33284e-34	1	ZEB2
TPM4	5.47146e-38	0.479549	1	0.98	9.16032e-34	1	TPM4
KIAA1644	1.52464e-37	0.376764	0.375	0.023	2.55255e-33	1	KIAA1644
FNDC1	1.64055e-37	0.35109	0.307	0.01	2.74661e-33	1	FNDC1
KDELR3	1.81165e-37	0.885812	1	0.63	3.03306e-33	1	KDELR3
TPM2	1.95106e-37	0.661682	1	0.795	3.26646e-33	1	TPM2
AHRR	2.3826e-37	0.513759	0.591	0.083	3.98894e-33	1	AHRR
HRCT1	2.55728e-37	0.357565	0.398	0.028	4.2814e-33	1	HRCT1
STK17B	4.68171e-37	0.889475	0.989	0.438	7.83811e-33	1	STK17B
CREB3L1	5.12228e-37	0.731882	0.83	0.205	8.57572e-33	1	CREB3L1
TCTA	5.13987e-37	0.922348	0.932	0.389	8.60517e-33	1	TCTA
DLX5	5.71337e-37	0.543289	0.375	0.023	9.56532e-33	1	DLX5
CTTN	7.85688e-37	0.367431	1	0.97	1.3154e-32	1	CTTN
SRGN	9.81511e-37	1.12045	1	0.315	1.64325e-32	1	SRGN
PARVA	1.02414e-36	0.815805	1	0.509	1.71462e-32	1	PARVA
SOCS5	1.91494e-36	0.891362	0.83	0.247	3.206e-32	1	SOCS5
NEXN	2.47039e-36	0.896494	1	0.581	4.13593e-32	1	NEXN
TMEM47	2.47979e-36	0.897818	0.92	0.363	4.15167e-32	1	TMEM47
DKK1	2.77549e-36	1.12598	0.75	0.179	4.64672e-32	1	DKK1
MYL9	2.81027e-36	0.818143	0.966	0.647	4.70496e-32	1	MYL9
GOPC	3.07218e-36	0.833814	0.784	0.197	5.14345e-32	1	GOPC
DLX2	3.39109e-36	0.379285	0.33	0.016	5.67737e-32	1	DLX2
PNPO	4.92985e-36	0.828243	0.977	0.437	8.25355e-32	1	PNPO
GNG12	5.93025e-36	0.872317	1	0.498	9.92842e-32	1	GNG12
SLFN5	6.25859e-36	0.890801	0.955	0.327	1.04781e-31	1	SLFN5
CRISPLD2	6.51502e-36	1.02668	0.875	0.274	1.09075e-31	1	CRISPLD2
DPYSL2	8.35742e-36	0.510419	1	0.898	1.3992e-31	1	DPYSL2
MDFIC	9.03253e-36	0.642992	0.557	0.087	1.51223e-31	1	MDFIC
MRVI1	1.07362e-35	0.611067	0.455	0.049	1.79745e-31	1	MRVI1
CAV1	1.38138e-35	0.991384	1	0.515	2.31271e-31	1	CAV1
NQO11	1.71478e-35	0.590697	1	0.848	2.87088e-31	1	NQO1
CD59	1.80403e-35	0.545034	1	0.935	3.02031e-31	1	CD59
IFITM10	2.55822e-35	0.289591	0.375	0.026	4.28298e-31	1	IFITM10
BAG2	2.89543e-35	0.812057	0.818	0.266	4.84753e-31	1	BAG2
CPED1	3.39235e-35	0.754248	0.443	0.046	5.67947e-31	1	CPED1
MYLK	3.45029e-35	0.934746	0.83	0.257	5.77647e-31	1	MYLK
SH2D4A	3.76147e-35	0.830206	0.773	0.192	6.29746e-31	1	SH2D4A
ADAMTS5	4.41432e-35	0.377275	0.341	0.019	7.39046e-31	1	ADAMTS5
ABI3BP	4.95064e-35	1.00935	0.966	0.315	8.28836e-31	1	ABI3BP
C7orf73	7.0409e-35	0.457341	1	0.913	1.17879e-30	1	C7orf73
SHOX	7.48266e-35	0.574262	0.364	0.025	1.25275e-30	1	SHOX
ATP10A	7.63151e-35	0.306085	0.375	0.028	1.27767e-30	1	ATP10A
MEIS2	8.3089e-35	0.899855	0.761	0.186	1.39108e-30	1	MEIS2
ADAMTSL1	8.87641e-35	0.850041	0.693	0.148	1.48609e-30	1	ADAMTSL1
GDF5	9.83661e-35	0.42608	0.295	0.012	1.64684e-30	1	GDF5
PRSS23	1.04361e-34	0.823482	1	0.608	1.74721e-30	1	PRSS23
CLIC4	1.41537e-34	0.6445	1	0.801	2.36962e-30	1	CLIC4
SLC38A2	1.58123e-34	0.586808	1	0.891	2.64729e-30	1	SLC38A2
TMEM173	2.55522e-34	0.7978	0.75	0.16	4.27795e-30	1	TMEM173
SH3BGRL	3.6462e-34	0.73875	0.989	0.698	6.10446e-30	1	SH3BGRL
SGCD	4.10794e-34	0.507597	0.307	0.015	6.87752e-30	1	SGCD
TMEM263	8.03226e-34	0.613112	1	0.875	1.34476e-29	1	TMEM263
STAT1	9.27882e-34	0.76476	1	0.755	1.55346e-29	1	STAT1
CD44	1.00679e-33	1.11421	1	0.467	1.68557e-29	1	CD44
RIMS1	1.07673e-33	0.558911	0.398	0.036	1.80266e-29	1	RIMS1
SYNPO2	1.13859e-33	0.555372	0.432	0.046	1.90623e-29	1	SYNPO2
FAS	1.2422e-33	0.944419	0.795	0.205	2.07968e-29	1	FAS
GALNT1	1.26549e-33	0.710372	0.989	0.769	2.11868e-29	1	GALNT1
KCNE4	1.39146e-33	0.505408	0.409	0.038	2.32958e-29	1	KCNE4
LPAR1	1.67538e-33	0.892861	0.818	0.221	2.80493e-29	1	LPAR1
C12orf75	2.12766e-33	0.852784	0.966	0.576	3.56213e-29	1	C12orf75
SYNE1	2.59128e-33	0.793565	1	0.628	4.33833e-29	1	SYNE1
EMP1	2.82037e-33	0.979738	0.989	0.343	4.72187e-29	1	EMP1
CHSY3	2.86299e-33	0.489229	0.352	0.025	4.79322e-29	1	CHSY3
VDR	3.02156e-33	0.486509	0.386	0.035	5.0587e-29	1	VDR
CALHM2	3.1123e-33	0.714045	0.591	0.103	5.21062e-29	1	CALHM2
MOXD1	3.40831e-33	0.634709	0.386	0.035	5.7062e-29	1	MOXD1
GRAMD3	3.53925e-33	0.926777	0.795	0.226	5.92541e-29	1	GRAMD3
ARHGAP1	5.11147e-33	0.451417	1	0.923	8.55763e-29	1	ARHGAP1
TCEAL3	5.46624e-33	0.739737	0.92	0.369	9.15158e-29	1	TCEAL3
FHL1	5.64802e-33	1.02521	0.83	0.309	9.45591e-29	1	FHL1
CDK2AP1	6.16852e-33	0.714979	0.989	0.678	1.03273e-28	1	CDK2AP1
SAMD9	6.53488e-33	0.70206	0.659	0.139	1.09407e-28	1	SAMD9
GFRA1	7.00632e-33	0.559078	0.386	0.035	1.173e-28	1	GFRA1
RUNX1	8.26542e-33	0.797736	0.818	0.226	1.3838e-28	1	RUNX1
PEAR1	8.9514e-33	0.801639	0.955	0.322	1.49864e-28	1	PEAR1
EFEMP1	9.54863e-33	1.06202	0.955	0.36	1.59863e-28	1	EFEMP1
LGALS3BP	1.20604e-32	0.893337	0.92	0.286	2.01916e-28	1	LGALS3BP
DSTN	1.22906e-32	0.317273	1	0.997	2.0577e-28	1	DSTN
EMP3	1.31385e-32	0.900121	1	0.498	2.19965e-28	1	EMP3
LAYN	1.36147e-32	0.72057	0.659	0.131	2.27937e-28	1	LAYN
ANXA1	1.61935e-32	1.05408	1	0.428	2.71112e-28	1	ANXA1
ANKH	1.89581e-32	0.818354	0.807	0.257	3.17397e-28	1	ANKH
PDLIM5	2.18778e-32	0.586537	0.989	0.852	3.66279e-28	1	PDLIM5
RBM3	2.45631e-32	0.379586	1	0.936	4.11236e-28	1	RBM3
BEND6	3.2037e-32	0.595624	0.466	0.061	5.36363e-28	1	BEND6
SEMA5A	3.53517e-32	0.779896	0.795	0.251	5.91858e-28	1	SEMA5A
XYLT1	3.54299e-32	0.61253	0.659	0.136	5.93168e-28	1	XYLT1
NRP1	4.58346e-32	0.809006	1	0.554	7.67362e-28	1	NRP1
FGF2	4.87988e-32	0.770801	0.795	0.261	8.16989e-28	1	FGF2
PRKCDBP	5.28491e-32	0.706361	0.875	0.284	8.84799e-28	1	PRKCDBP
MARCKS	5.39204e-32	0.441802	1	0.988	9.02735e-28	1	MARCKS
NFIC	6.0264e-32	0.817794	0.966	0.357	1.00894e-27	1	NFIC
MICA	6.584e-32	0.252648	0.841	0.251	1.10229e-27	1	MICA
SPARC	7.76199e-32	0.32855	1	0.988	1.29951e-27	1	SPARC
APOBEC3C	1.1407e-31	0.747028	1	0.62	1.90975e-27	1	APOBEC3C
ATP10D	1.29003e-31	0.861001	0.886	0.311	2.15977e-27	1	ATP10D
ARSJ	1.36952e-31	0.941425	0.818	0.266	2.29285e-27	1	ARSJ
ENAH	1.40075e-31	0.458534	1	0.939	2.34513e-27	1	ENAH
FAM69A	1.41491e-31	0.894883	0.75	0.212	2.36884e-27	1	FAM69A
ECM1	1.8554e-31	0.775321	0.636	0.132	3.10631e-27	1	ECM1
RSU1	2.33057e-31	0.597714	1	0.766	3.90185e-27	1	RSU1
ATL3	2.86955e-31	0.611435	1	0.781	4.80421e-27	1	ATL3
PTPRQ	3.0007e-31	0.369221	0.295	0.016	5.02377e-27	1	PTPRQ
TK2	3.5233e-31	0.39229	0.818	0.229	5.89872e-27	1	TK2
DSE	3.59511e-31	0.786439	0.966	0.45	6.01893e-27	1	DSE
ZCCHC24	3.78457e-31	0.594145	0.659	0.147	6.33613e-27	1	ZCCHC24
CD109	4.02603e-31	0.731037	1	0.363	6.74038e-27	1	CD109
DOCK10	4.62356e-31	0.778186	0.727	0.177	7.74076e-27	1	DOCK10
CDKN2C	4.63766e-31	0.596733	0.511	0.077	7.76436e-27	1	CDKN2C
PCDHGC3	4.80332e-31	0.712052	0.83	0.254	8.04172e-27	1	PCDHGC3
BTBD19	5.81994e-31	0.824666	0.75	0.213	9.74374e-27	1	BTBD19
NNMT	6.81819e-31	0.996786	1	0.444	1.1415e-26	1	NNMT
LOX	7.71303e-31	0.904903	1	0.493	1.29132e-26	1	LOX
LGALS1	7.82036e-31	0.774411	1	0.733	1.30928e-26	1	LGALS1
CKAP4	1.08105e-30	0.460498	1	0.926	1.8099e-26	1	CKAP4
BNC2	1.24508e-30	0.750162	0.852	0.276	2.08452e-26	1	BNC2
COL6A1	1.80946e-30	0.704842	1	0.668	3.0294e-26	1	COL6A1
GPNMB	2.30947e-30	0.774006	0.534	0.091	3.86651e-26	1	GPNMB
WSB2	2.35608e-30	0.604489	1	0.808	3.94455e-26	1	WSB2
EIF1AY	3.0932e-30	0.627787	0.898	0.269	5.17864e-26	1	EIF1AY
NAV1	4.34804e-30	0.777949	0.966	0.538	7.27948e-26	1	NAV1
GLS	5.33558e-30	0.679196	0.989	0.784	8.93282e-26	1	GLS
PDE4DIP	8.69588e-30	0.719195	0.989	0.695	1.45586e-25	1	PDE4DIP
HIF1A	1.00512e-29	0.357338	1	0.985	1.68276e-25	1	HIF1A
C1R	1.03812e-29	0.674144	0.864	0.221	1.73802e-25	1	C1R
ADAM9	1.04929e-29	0.58812	1	0.771	1.75672e-25	1	ADAM9
CDH13	1.24542e-29	0.91404	0.909	0.318	2.08508e-25	1	CDH13
KANK2	1.30111e-29	0.756065	0.92	0.393	2.17831e-25	1	KANK2
S100A6	1.39551e-29	0.816053	1	0.723	2.33636e-25	1	S100A6
NID2	1.74414e-29	0.75553	0.534	0.094	2.92004e-25	1	NID2
C16orf45	1.74499e-29	0.56618	0.92	0.383	2.92145e-25	1	C16orf45
SH3BGRL3	2.50202e-29	0.323316	1	0.997	4.18889e-25	1	SH3BGRL3
CACNA2D1	2.56798e-29	0.819047	0.682	0.186	4.29931e-25	1	CACNA2D1
MYOF	3.153e-29	0.664469	1	0.721	5.27876e-25	1	MYOF
ATP2B4	3.16626e-29	0.665438	0.989	0.726	5.30096e-25	1	ATP2B4
LOXL2	4.36738e-29	0.788954	0.977	0.39	7.31186e-25	1	LOXL2
CTHRC1	4.6727e-29	0.92861	0.818	0.287	7.82303e-25	1	CTHRC1
SMURF2	5.07869e-29	0.73903	0.977	0.662	8.50273e-25	1	SMURF2
VIM	5.33098e-29	0.874052	1	0.666	8.92512e-25	1	VIM
SERPINE2	5.6938e-29	0.759034	1	0.71	9.53257e-25	1	SERPINE2
PFN2	5.69674e-29	0.455795	1	0.893	9.53748e-25	1	PFN2
EFEMP2	6.67368e-29	0.808277	0.955	0.422	1.11731e-24	1	EFEMP2
ARPC5	6.82578e-29	0.354444	1	0.955	1.14277e-24	1	ARPC5
EGR1	7.25524e-29	0.790383	1	0.621	1.21467e-24	1	EGR1
ANAPC13	8.10227e-29	0.573366	1	0.807	1.35648e-24	1	ANAPC13
PRRX2	1.04075e-28	0.471423	0.42	0.055	1.74243e-24	1	PRRX2
RWDD2B	1.24258e-28	0.805367	0.932	0.485	2.08032e-24	1	RWDD2B
PSD3	1.29937e-28	0.832636	0.864	0.353	2.1754e-24	1	PSD3
NOTCH3	1.32394e-28	0.503285	0.852	0.313	2.21654e-24	1	NOTCH3
HOXA10	1.60801e-28	0.740411	0.648	0.157	2.69213e-24	1	HOXA10
DAB2	1.84214e-28	0.744987	1	0.623	3.08411e-24	1	DAB2
EVA1A	1.91167e-28	0.768567	0.58	0.125	3.20051e-24	1	EVA1A
ANXA5	2.02613e-28	0.261759	1	0.996	3.39214e-24	1	ANXA5
CNP	2.10193e-28	0.385921	1	0.893	3.51905e-24	1	CNP
SSPN	2.31225e-28	0.63568	0.545	0.1	3.87117e-24	1	SSPN
TRIM22	3.32028e-28	0.82361	0.852	0.296	5.55881e-24	1	TRIM22
VCAN	3.37415e-28	0.667949	1	0.678	5.649e-24	1	VCAN
S100A11	3.65105e-28	0.294933	1	0.994	6.11259e-24	1	S100A11
CASP4	3.65289e-28	0.875262	0.92	0.305	6.11568e-24	1	CASP4
SNED1	3.88319e-28	0.403101	0.42	0.055	6.50123e-24	1	SNED1
KAZALD1	4.01244e-28	0.445422	0.42	0.055	6.71763e-24	1	KAZALD1
CALU	4.49009e-28	0.27107	1	0.997	7.51732e-24	1	CALU
UBA7	5.21656e-28	0.60016	0.489	0.078	8.73357e-24	1	UBA7
PEAK1	5.33476e-28	0.802863	0.943	0.478	8.93145e-24	1	PEAK1
HOXB7	5.37613e-28	0.662514	0.795	0.206	9.00072e-24	1	HOXB7
LXN	6.59701e-28	0.981227	0.784	0.312	1.10447e-23	1	LXN
HSPB1	7.31389e-28	0.670327	0.989	0.61	1.22449e-23	1	HSPB1
VIT	8.04537e-28	0.502088	0.284	0.019	1.34696e-23	1	VIT
PXDC1	9.36542e-28	0.770066	0.943	0.401	1.56796e-23	1	PXDC1
AHR	1.03336e-27	0.754137	0.955	0.39	1.73005e-23	1	AHR
SUMF2	1.05391e-27	0.458394	1	0.891	1.76445e-23	1	SUMF2
MOK	1.18791e-27	0.839452	0.807	0.295	1.98879e-23	1	MOK
PCOLCE2	1.4224e-27	0.74923	0.523	0.1	2.38139e-23	1	PCOLCE2
CCND1	1.76156e-27	0.762575	0.92	0.358	2.94921e-23	1	CCND1
SMIM3	1.97808e-27	0.745465	0.864	0.27	3.31171e-23	1	SMIM3
GSTM3	2.56144e-27	0.816667	0.977	0.464	4.28836e-23	1	GSTM3
ZEB1	2.90292e-27	0.785047	0.955	0.29	4.86007e-23	1	ZEB1
TAF13	3.98421e-27	0.468199	0.989	0.862	6.67037e-23	1	TAF13
TNS1	4.03174e-27	0.68216	0.932	0.318	6.74995e-23	1	TNS1
STK38L	4.22055e-27	0.819103	0.943	0.546	7.06604e-23	1	STK38L
MXRA7	4.58881e-27	0.704687	0.989	0.512	7.68258e-23	1	MXRA7
TIMP1	5.14667e-27	0.528721	1	0.907	8.61655e-23	1	TIMP1
MYOCD	6.71802e-27	0.373606	0.273	0.017	1.12473e-22	1	MYOCD
MN1	8.12063e-27	0.348904	0.341	0.035	1.35956e-22	1	MN1
RUNX2	8.40439e-27	0.730534	0.591	0.135	1.40706e-22	1	RUNX2
UGDH	8.9369e-27	0.424029	1	0.936	1.49622e-22	1	UGDH
VAMP5	9.73786e-27	0.805796	0.989	0.498	1.63031e-22	1	VAMP5
SLC16A4	1.0225e-26	0.794136	0.886	0.37	1.71187e-22	1	SLC16A4
BGN	1.1441e-26	0.789097	1	0.361	1.91544e-22	1	BGN
ARPC4	1.19781e-26	0.300929	1	0.975	2.00537e-22	1	ARPC4
STXBP5	1.27476e-26	0.707848	0.909	0.373	2.13421e-22	1	STXBP5
PPAP2B	1.59176e-26	0.699901	0.989	0.607	2.66492e-22	1	PPAP2B
TSPO	1.71605e-26	0.827633	0.989	0.482	2.87301e-22	1	TSPO
CCDC53	1.99315e-26	0.662609	0.977	0.647	3.33693e-22	1	CCDC53
PPP3CA	2.03943e-26	0.442774	1	0.926	3.41441e-22	1	PPP3CA
IFI27L2	2.18274e-26	0.480328	0.966	0.678	3.65435e-22	1	IFI27L2
NABP1	2.42207e-26	0.840466	0.898	0.48	4.05503e-22	1	NABP1
HEG1	2.53493e-26	0.725937	0.909	0.415	4.24398e-22	1	HEG1
TUBA1A	2.54486e-26	0.340403	1	0.985	4.26061e-22	1	TUBA1A
ARPC1B	2.74167e-26	0.502777	0.989	0.806	4.59011e-22	1	ARPC1B
TSPYL1	2.83059e-26	0.283191	1	0.965	4.73898e-22	1	TSPYL1
CHMP3	2.90645e-26	0.642207	1	0.656	4.86597e-22	1	CHMP3
MFSD1	3.06132e-26	0.763238	0.886	0.412	5.12526e-22	1	MFSD1
ANKRD30B	3.31889e-26	0.421427	0.33	0.032	5.55649e-22	1	ANKRD30B
2021-09-11	3.49532e-26	0.33878	1	0.971	5.85186e-22	1	2021-09-11
PIGK	3.68787e-26	0.753362	0.966	0.56	6.17424e-22	1	PIGK
NREP	3.9466e-26	0.554874	1	0.821	6.60739e-22	1	NREP
NBPF14	4.08331e-26	0.506475	1	0.869	6.83627e-22	1	NBPF14
BST1	4.3228e-26	0.632275	0.58	0.126	7.23723e-22	1	BST1
FN1	5.4946e-26	0.411304	1	0.985	9.19906e-22	1	FN1
C9orf3	5.71712e-26	0.771901	0.875	0.486	9.5716e-22	1	C9orf3
HSPB2	5.88175e-26	0.527394	0.591	0.119	9.84722e-22	1	HSPB2
FBLN5	6.4933e-26	0.589814	0.557	0.112	1.08711e-21	1	FBLN5
C1S	9.20154e-26	0.806167	0.909	0.334	1.54052e-21	1	C1S
SMARCA2	9.37447e-26	0.770354	0.898	0.389	1.56947e-21	1	SMARCA2
CTSK	1.0289e-25	0.868105	0.818	0.311	1.72259e-21	1	CTSK
AK1	1.11486e-25	0.66557	0.989	0.598	1.8665e-21	1	AK1
KLF9	2.22689e-25	0.745381	0.761	0.258	3.72826e-21	1	KLF9
PAM	2.23698e-25	0.811821	0.92	0.478	3.74514e-21	1	PAM
ITGA1	2.2822e-25	0.527975	0.545	0.115	3.82085e-21	1	ITGA1
SP100	2.8777e-25	0.830717	1	0.409	4.81784e-21	1	SP100
HAS2	2.90731e-25	0.90696	0.852	0.348	4.86742e-21	1	HAS2
ARMCX2	4.4889e-25	0.771724	0.898	0.411	7.51532e-21	1	ARMCX2
PTPRS	4.95207e-25	0.51951	1	0.692	8.29075e-21	1	PTPRS
CDK15	5.09063e-25	0.438887	0.341	0.038	8.52274e-21	1	CDK15
NMT2	5.31071e-25	0.763882	0.955	0.491	8.8912e-21	1	NMT2
SMIM14	6.06808e-25	0.503321	1	0.853	1.01592e-20	1	SMIM14
BCAT1	6.13864e-25	0.450898	1	0.904	1.02773e-20	1	BCAT1
ERBB2IP	7.57781e-25	0.555412	1	0.833	1.26868e-20	1	ERBB2IP
NBPF10	8.07991e-25	0.529762	1	0.745	1.35274e-20	1	NBPF10
SYT11	8.73119e-25	0.677117	0.807	0.318	1.46178e-20	1	SYT11
TRPS1	9.58695e-25	0.664342	0.761	0.264	1.60505e-20	1	TRPS1
GLTP	1.0231e-24	0.550875	1	0.771	1.71288e-20	1	GLTP
PODNL1	1.05129e-24	0.261035	0.25	0.016	1.76006e-20	1	PODNL1
EXT1	1.05889e-24	0.787178	0.864	0.434	1.7728e-20	1	EXT1
SGCB	1.10184e-24	0.523049	0.989	0.75	1.8447e-20	1	SGCB
POPDC3	1.25873e-24	0.6311	0.523	0.106	2.10737e-20	1	POPDC3
ACTR3	1.28247e-24	0.356156	1	0.914	2.14712e-20	1	ACTR3
SIPA1L1	1.38061e-24	0.60508	0.989	0.75	2.31141e-20	1	SIPA1L1
HOXC9	1.56735e-24	0.312039	0.318	0.032	2.62405e-20	1	HOXC9
PTPN14	1.90835e-24	0.564561	1	0.666	3.19497e-20	1	PTPN14
APOL2	1.98704e-24	0.665838	0.989	0.52	3.3267e-20	1	APOL2
RHOQ	2.64463e-24	0.730293	0.92	0.491	4.42764e-20	1	RHOQ
RAB27B	2.9169e-24	0.380569	0.284	0.025	4.88348e-20	1	RAB27B
TM4SF1	3.25374e-24	0.920625	1	0.389	5.44741e-20	1	TM4SF1
PLCB4	3.36523e-24	0.64699	0.602	0.158	5.63406e-20	1	PLCB4
BAALC	3.37452e-24	0.561526	0.443	0.073	5.64962e-20	1	BAALC
BMP1	4.45745e-24	0.596927	0.773	0.257	7.46266e-20	1	BMP1
UPK3BL	4.64525e-24	0.503427	0.989	0.811	7.77708e-20	1	UPK3BL
MEIS1	5.22043e-24	0.889086	0.83	0.35	8.74004e-20	1	MEIS1
PDZD11	5.6704e-24	0.498664	0.989	0.752	9.49338e-20	1	PDZD11
CD151	5.90152e-24	0.563651	0.932	0.479	9.88033e-20	1	CD151
JAG1	6.22064e-24	0.664831	0.773	0.305	1.04146e-19	1	JAG1
B3GNT9	7.304e-24	0.353698	0.42	0.065	1.22284e-19	1	B3GNT9
GNG11	7.55756e-24	0.739704	0.977	0.386	1.26529e-19	1	GNG11
GAS6	7.75389e-24	0.542044	0.682	0.199	1.29816e-19	1	GAS6
APPL2	8.33161e-24	0.66734	0.966	0.597	1.39488e-19	1	APPL2
LY96	9.32286e-24	0.744151	0.67	0.186	1.56083e-19	1	LY96
FOXP1	9.95398e-24	0.510571	1	0.801	1.6665e-19	1	FOXP1
SRPRB	1.06535e-23	0.345804	1	0.942	1.78361e-19	1	SRPRB
MRAS	1.15799e-23	0.613324	0.67	0.192	1.93871e-19	1	MRAS
HMGN2	1.25489e-23	0.339105	1	0.965	2.10094e-19	1	HMGN2
PPIC1	1.65889e-23	0.497466	1	0.81	2.77732e-19	1	PPIC
RAB31	1.66461e-23	0.70245	0.989	0.52	2.78689e-19	1	RAB31
CCPG1	1.68496e-23	0.552028	0.989	0.766	2.82096e-19	1	CCPG1
MICAL2	1.79722e-23	0.692343	0.875	0.392	3.0089e-19	1	MICAL2
LAMC1	1.8218e-23	0.517308	1	0.833	3.05005e-19	1	LAMC1
MAMLD1	1.87552e-23	0.455508	0.375	0.054	3.13999e-19	1	MAMLD1
TTC39C	1.97909e-23	0.642898	0.966	0.563	3.31338e-19	1	TTC39C
CLCF1	2.03929e-23	0.630671	0.42	0.074	3.41417e-19	1	CLCF1
ACTR2	2.80097e-23	0.302026	1	0.964	4.68938e-19	1	ACTR2
RARG	3.02935e-23	0.618865	0.648	0.19	5.07174e-19	1	RARG
UGCG	3.42629e-23	0.45459	1	0.92	5.7363e-19	1	UGCG
EID1	3.49156e-23	0.273511	1	0.952	5.84557e-19	1	EID1
COMT	3.90084e-23	0.721814	0.955	0.508	6.53079e-19	1	COMT
PLP2	4.04424e-23	0.806501	0.989	0.459	6.77086e-19	1	PLP2
CCDC92	4.15472e-23	0.435467	0.852	0.356	6.95582e-19	1	CCDC92
NDUFB1	4.2659e-23	0.301371	0.989	0.958	7.14198e-19	1	NDUFB1
GBP3	4.47328e-23	0.732638	0.659	0.199	7.48917e-19	1	GBP3
AFAP1	4.7049e-23	0.620218	0.875	0.373	7.87694e-19	1	AFAP1
NUDT19	4.95729e-23	0.613999	0.966	0.605	8.29949e-19	1	NUDT19
RCAN2	6.47108e-23	0.370145	0.273	0.025	1.08339e-18	1	RCAN2
CDC42BPA	6.82439e-23	0.491418	1	0.884	1.14254e-18	1	CDC42BPA
ATOH8	7.49056e-23	0.339781	0.284	0.028	1.25407e-18	1	ATOH8
REXO2	9.37579e-23	0.293313	1	0.922	1.5697e-18	1	REXO2
MAP3K7CL	9.48734e-23	0.6132	0.466	0.093	1.58837e-18	1	MAP3K7CL
NGF	1.21799e-22	0.621576	0.398	0.065	2.03915e-18	1	NGF
LTBR	1.28168e-22	0.573901	0.773	0.251	2.14579e-18	1	LTBR
FAM160B1	1.42219e-22	0.699155	0.886	0.514	2.38102e-18	1	FAM160B1
MYO1C	1.53045e-22	0.590449	0.966	0.62	2.56228e-18	1	MYO1C
C1orf54	1.56363e-22	0.788006	0.83	0.351	2.61783e-18	1	C1orf54
PTP4A2	1.69953e-22	0.299046	1	0.99	2.84535e-18	1	PTP4A2
NR3C1	1.86944e-22	0.647043	0.989	0.582	3.12982e-18	1	NR3C1
TES	2.24221e-22	0.491132	1	0.861	3.75391e-18	1	TES
BACE1	2.49066e-22	0.661017	0.864	0.406	4.16986e-18	1	BACE1
KITLG	2.79433e-22	0.655901	0.523	0.125	4.67826e-18	1	KITLG
ARF6	3.4279e-22	0.351705	1	0.961	5.739e-18	1	ARF6
DUSP10	3.55482e-22	0.710092	0.739	0.25	5.95147e-18	1	DUSP10
EPG5	4.41608e-22	0.622537	0.909	0.478	7.3934e-18	1	EPG5
SETD7	4.7435e-22	0.584217	0.773	0.283	7.94156e-18	1	SETD7
PTEN	5.75125e-22	0.356989	1	0.942	9.62874e-18	1	PTEN
DNAJB4	5.93137e-22	0.640223	0.966	0.639	9.93029e-18	1	DNAJB4
TXLNA	6.68198e-22	0.420453	1	0.856	1.1187e-17	1	TXLNA
ARL6IP5	6.84513e-22	0.413886	0.989	0.84	1.14601e-17	1	ARL6IP5
MYH9	7.44261e-22	0.366019	1	0.936	1.24604e-17	1	MYH9
RFTN1	1.60327e-21	0.669819	0.636	0.21	2.68419e-17	1	RFTN1
AHNAK	1.76683e-21	0.459035	1	0.781	2.95803e-17	1	AHNAK
C11orf70	2.04968e-21	0.692418	0.5	0.115	3.43157e-17	1	C11orf70
C1GALT1	2.10897e-21	0.658263	0.932	0.639	3.53084e-17	1	C1GALT1
NDUFAF3	2.21184e-21	0.507924	0.989	0.716	3.70306e-17	1	NDUFAF3
GSTA4	2.21613e-21	0.776032	0.784	0.34	3.71025e-17	1	GSTA4
CRIP2	2.31633e-21	0.736654	0.977	0.434	3.878e-17	1	CRIP2
SNX18	2.32989e-21	0.569831	0.784	0.337	3.9007e-17	1	SNX18
TMBIM4	2.93804e-21	0.379277	0.989	0.878	4.91887e-17	1	TMBIM4
IL1R1	3.31257e-21	0.564367	0.705	0.209	5.5459e-17	1	IL1R1
IFI16	4.07777e-21	0.77578	0.977	0.409	6.82701e-17	1	IFI16
ANKRD40	4.44219e-21	0.352581	1	0.896	7.43712e-17	1	ANKRD40
SUGCT	4.74598e-21	0.770734	0.784	0.324	7.94571e-17	1	SUGCT
VCL	4.98575e-21	0.375599	1	0.891	8.34714e-17	1	VCL
NOTCH2	5.12039e-21	0.538656	0.966	0.599	8.57256e-17	1	NOTCH2
CD97	5.43596e-21	0.454639	0.557	0.136	9.10089e-17	1	CD97
TRAM2	5.8584e-21	0.552755	0.886	0.402	9.80813e-17	1	TRAM2
SRPX2	6.22677e-21	0.68543	0.67	0.184	1.04249e-16	1	SRPX2
NIPSNAP3A	6.77334e-21	0.650451	0.898	0.56	1.13399e-16	1	NIPSNAP3A
ITGAV	6.87803e-21	0.599038	0.977	0.673	1.15152e-16	1	ITGAV
PARP3	6.9528e-21	0.683064	0.534	0.141	1.16404e-16	1	PARP3
NFASC	7.63943e-21	0.498979	0.477	0.106	1.27899e-16	1	NFASC
PPP1R12A	7.64682e-21	0.286857	1	0.981	1.28023e-16	1	PPP1R12A
IFITM3	8.5906e-21	0.397172	1	0.917	1.43824e-16	1	IFITM3
LSAMP	9.27111e-21	0.438738	0.352	0.054	1.55217e-16	1	LSAMP
MYO1E	1.10764e-20	0.640244	0.977	0.614	1.8544e-16	1	MYO1E
NRG1	1.2078e-20	0.742594	0.727	0.282	2.02211e-16	1	NRG1
FERMT2	1.24723e-20	0.409538	1	0.866	2.08811e-16	1	FERMT2
NFATC4	1.34301e-20	0.550612	0.648	0.197	2.24847e-16	1	NFATC4
MYO1B	1.41152e-20	0.515377	1	0.788	2.36316e-16	1	MYO1B
SATB2	1.4199e-20	0.561404	0.727	0.237	2.3772e-16	1	SATB2
RAPH1	1.42293e-20	0.63095	0.886	0.518	2.38227e-16	1	RAPH1
SVEP1	1.44967e-20	0.296084	0.261	0.026	2.42704e-16	1	SVEP1
CTIF	1.5942e-20	0.62768	0.784	0.329	2.66901e-16	1	CTIF
ZBTB38	1.70437e-20	0.669691	0.977	0.537	2.85346e-16	1	ZBTB38
CORO1C	2.04804e-20	0.365357	1	0.904	3.42883e-16	1	CORO1C
NFIA	2.28256e-20	0.588107	0.807	0.29	3.82146e-16	1	NFIA
CPEB2	2.72571e-20	0.53674	0.602	0.181	4.56338e-16	1	CPEB2
FAM200B	2.81776e-20	0.468718	0.977	0.781	4.7175e-16	1	FAM200B
BLOC1S1	2.87514e-20	0.372466	0.966	0.843	4.81356e-16	1	BLOC1S1
ARNT2	3.07109e-20	0.405976	0.443	0.091	5.14162e-16	1	ARNT2
NIPAL3	3.62112e-20	0.629023	0.83	0.412	6.06248e-16	1	NIPAL3
ANKRD28	3.7386e-20	0.589593	1	0.711	6.25916e-16	1	ANKRD28
ANKRD44	3.74131e-20	0.566406	0.455	0.103	6.2637e-16	1	ANKRD44
GTF2H5	3.88165e-20	0.420913	0.977	0.817	6.49865e-16	1	GTF2H5
LTBP1	4.10656e-20	0.656551	0.92	0.472	6.8752e-16	1	LTBP1
SLC41A2	4.31431e-20	0.636917	0.852	0.408	7.22302e-16	1	SLC41A2
ITGA10	5.2556e-20	0.517905	0.614	0.17	8.79892e-16	1	ITGA10
MARVELD1	5.63918e-20	0.5184	0.602	0.179	9.44111e-16	1	MARVELD1
CYP4V2	5.7374e-20	0.510942	0.33	0.051	9.60555e-16	1	CYP4V2
IFIT5	5.80145e-20	0.640027	0.773	0.325	9.71279e-16	1	IFIT5
LMNA	5.82914e-20	0.537901	0.989	0.681	9.75915e-16	1	LMNA
FAM198B	5.92175e-20	0.616166	0.614	0.189	9.91419e-16	1	FAM198B
KRBOX1	6.00215e-20	0.487901	0.25	0.025	1.00488e-15	1	KRBOX1
TMEM256.PLSCR3	6.21045e-20	0.519645	0.943	0.544	1.03975e-15	1	TMEM256.PLSCR3
LARP6	6.60624e-20	0.657998	0.761	0.309	1.10602e-15	1	LARP6
DRAP1	7.62367e-20	0.411877	0.977	0.858	1.27636e-15	1	DRAP1
SASH1	8.08663e-20	0.564159	0.83	0.34	1.35386e-15	1	SASH1
CRIPT	9.21188e-20	0.529419	0.932	0.673	1.54225e-15	1	CRIPT
RRAS	9.29207e-20	0.59823	0.818	0.322	1.55568e-15	1	RRAS
RBFOX2	9.33034e-20	0.348805	1	0.83	1.56209e-15	1	RBFOX2
FXYD5	9.75769e-20	0.59877	0.989	0.617	1.63363e-15	1	FXYD5
SLC30A4	1.01799e-19	0.667992	0.727	0.28	1.70432e-15	1	SLC30A4
NAALADL2	1.10208e-19	0.556233	0.455	0.103	1.8451e-15	1	NAALADL2
COMMD3.BMI1	1.18518e-19	0.598953	0.932	0.573	1.98422e-15	1	COMMD3.BMI1
NUCB2	1.4901e-19	0.356579	1	0.925	2.49472e-15	1	NUCB2
FAM46A	1.54502e-19	0.67218	0.92	0.514	2.58667e-15	1	FAM46A
MT1E	1.6345e-19	0.704388	1	0.495	2.73649e-15	1	MT1E
SELM	1.70924e-19	0.498235	1	0.808	2.86161e-15	1	SELM
IFITM2	1.71365e-19	0.427126	1	0.868	2.86899e-15	1	IFITM2
CARD16	1.90178e-19	0.460652	0.409	0.078	3.18396e-15	1	CARD16
ZYX	2.06719e-19	0.4421	0.989	0.765	3.46089e-15	1	ZYX
PLS3	2.10375e-19	0.313061	1	0.923	3.5221e-15	1	PLS3
RAB30	2.15928e-19	0.71304	0.716	0.295	3.61506e-15	1	RAB30
EGFLAM	2.18037e-19	0.633788	0.375	0.073	3.65038e-15	1	EGFLAM
HOXA3	2.20709e-19	0.452343	0.568	0.164	3.69511e-15	1	HOXA3
SH3BP4	2.45807e-19	0.581263	0.773	0.343	4.11529e-15	1	SH3BP4
NKX3.1	2.63055e-19	0.657905	0.58	0.189	4.40407e-15	1	NKX3.1
PLAGL1	2.66992e-19	0.601358	0.795	0.319	4.46999e-15	1	PLAGL1
SSH1	2.81502e-19	0.532616	0.841	0.402	4.71291e-15	1	SSH1
PTN	2.98361e-19	0.513189	0.727	0.248	4.99516e-15	1	PTN
ACTN1	3.07726e-19	0.447284	1	0.839	5.15195e-15	1	ACTN1
RTN4	3.16164e-19	0.281609	1	0.985	5.29321e-15	1	RTN4
PRKD11	3.36761e-19	0.707153	0.648	0.232	5.63805e-15	1	PRKD1
DLC1	3.69277e-19	0.54922	0.977	0.695	6.18243e-15	1	DLC1
UAP1	3.88576e-19	0.655166	0.955	0.55	6.50554e-15	1	UAP1
MEDAG	4.17449e-19	0.344026	0.523	0.123	6.98893e-15	1	MEDAG
SDC2	4.23176e-19	0.653854	0.932	0.517	7.08481e-15	1	SDC2
TNFAIP2	4.71018e-19	0.704217	0.818	0.376	7.88579e-15	1	TNFAIP2
PTGIS	5.14753e-19	0.601538	0.795	0.386	8.618e-15	1	PTGIS
SERPINH1	5.20346e-19	0.346816	1	0.923	8.71163e-15	1	SERPINH1
FAM76A	5.60209e-19	0.410505	0.989	0.817	9.37901e-15	1	FAM76A
ATP8B1	5.67445e-19	0.621884	0.727	0.298	9.50016e-15	1	ATP8B1
DCLK2	6.32209e-19	0.294998	0.284	0.038	1.05844e-14	1	DCLK2
ENDOD1	6.32285e-19	0.552158	0.591	0.186	1.05857e-14	1	ENDOD1
COLGALT1	7.08052e-19	0.267857	1	0.946	1.18542e-14	1	COLGALT1
TCEAL8	7.83802e-19	0.391169	0.977	0.88	1.31224e-14	1	TCEAL8
PEA15	8.15302e-19	0.528148	0.977	0.66	1.36498e-14	1	PEA15
FAM127A	8.27061e-19	0.339319	1	0.903	1.38466e-14	1	FAM127A
FAM229B	9.01025e-19	0.633468	0.864	0.472	1.5085e-14	1	FAM229B
PLXND1	1.00009e-18	0.585784	0.83	0.332	1.67435e-14	1	PLXND1
CASC4	1.03205e-18	0.363929	0.966	0.787	1.72786e-14	1	CASC4
TWF1	1.23561e-18	0.495774	0.989	0.714	2.06865e-14	1	TWF1
LPHN2	1.37212e-18	0.637101	0.841	0.43	2.2972e-14	1	LPHN2
ESD	1.41486e-18	0.280192	0.989	0.914	2.36875e-14	1	ESD
FAT1	1.4923e-18	0.602345	0.943	0.538	2.49842e-14	1	FAT1
GOLIM4	1.53176e-18	0.410192	1	0.891	2.56447e-14	1	GOLIM4
FAM120A	1.5705e-18	0.486495	1	0.694	2.62933e-14	1	FAM120A
TGFB1I1	3.27514e-18	0.636443	0.784	0.334	5.48324e-14	1	TGFB1I1
GALNT10	3.31573e-18	0.568261	0.784	0.344	5.55119e-14	1	GALNT10
CD68	3.47277e-18	0.578011	0.818	0.354	5.8141e-14	1	CD68
QSOX1	3.47752e-18	0.569641	0.92	0.54	5.82206e-14	1	QSOX1
CHCHD2	3.50033e-18	0.79127	1	0.396	5.86025e-14	1	CHCHD2
MSN	3.5158e-18	0.479237	0.989	0.747	5.88615e-14	1	MSN
FCHSD2	4.36372e-18	0.622026	0.716	0.293	7.30574e-14	1	FCHSD2
COMMD3	4.5968e-18	0.498555	0.977	0.671	7.69597e-14	1	COMMD3
FAM114A1	5.03488e-18	0.416415	1	0.842	8.4294e-14	1	FAM114A1
ABHD14B	5.06493e-18	0.587522	0.705	0.257	8.4797e-14	1	ABHD14B
NPTN	5.75472e-18	0.405279	1	0.872	9.63455e-14	1	NPTN
PRSS12	5.76556e-18	0.48446	0.466	0.113	9.65271e-14	1	PRSS12
NIN	6.08084e-18	0.544016	0.727	0.274	1.01805e-13	1	NIN
CDR2L	6.15125e-18	0.514339	0.898	0.498	1.02984e-13	1	CDR2L
SGMS2	6.23079e-18	0.34132	0.716	0.267	1.04316e-13	1	SGMS2
STAT2	6.27625e-18	0.363644	1	0.933	1.05077e-13	1	STAT2
UBE2E3	6.53782e-18	0.466232	1	0.727	1.09456e-13	1	UBE2E3
S100A3	8.16731e-18	0.510148	0.386	0.077	1.36737e-13	1	S100A3
RHOB	8.22379e-18	0.564882	0.886	0.438	1.37683e-13	1	RHOB
AMOTL2	9.47001e-18	0.571303	0.886	0.502	1.58547e-13	1	AMOTL2
C15orf52	1.02544e-17	0.337745	0.25	0.03	1.7168e-13	1	C15orf52
HERC4	1.04369e-17	0.412355	1	0.861	1.74734e-13	1	HERC4
TMEM200A	1.23977e-17	0.667597	0.614	0.235	2.07562e-13	1	TMEM200A
CPT1A	1.47199e-17	0.486212	0.705	0.29	2.46441e-13	1	CPT1A
PPP2R5C	1.48893e-17	0.271672	1	0.951	2.49276e-13	1	PPP2R5C
CAST	1.58498e-17	0.326124	1	0.804	2.65358e-13	1	CAST
SCFD2	1.78714e-17	0.610224	0.659	0.248	2.99204e-13	1	SCFD2
TBC1D19	1.82753e-17	0.635643	0.773	0.337	3.05965e-13	1	TBC1D19
CD47	1.83652e-17	0.544231	0.932	0.562	3.0747e-13	1	CD47
RAP1GDS1	1.9917e-17	0.49471	0.977	0.746	3.33451e-13	1	RAP1GDS1
FKBP14	2.01527e-17	0.558233	0.943	0.657	3.37396e-13	1	FKBP14
PYROXD2	2.02589e-17	0.357193	0.341	0.062	3.39174e-13	1	PYROXD2
DPYD	2.0989e-17	0.554514	0.773	0.325	3.51397e-13	1	DPYD
ALDH1B1	2.28188e-17	0.586653	0.864	0.48	3.82033e-13	1	ALDH1B1
WDR45	2.28189e-17	0.594546	0.898	0.531	3.82034e-13	1	WDR45
PLBD2	2.41e-17	0.471292	0.761	0.331	4.03483e-13	1	PLBD2
NME4	2.43923e-17	0.428882	0.943	0.808	4.08375e-13	1	NME4
ITPRIPL2	2.46524e-17	0.391257	0.727	0.302	4.1273e-13	1	ITPRIPL2
COMMD1	2.47529e-17	0.470563	0.977	0.734	4.14413e-13	1	COMMD1
ZNF662	3.01549e-17	0.403031	0.295	0.046	5.04853e-13	1	ZNF662
NCKAP5	3.07214e-17	0.503989	0.398	0.087	5.14337e-13	1	NCKAP5
CNN2	3.18534e-17	0.342097	0.989	0.866	5.3329e-13	1	CNN2
SKAP2	3.24123e-17	0.612251	0.909	0.467	5.42647e-13	1	SKAP2
HSPB2.C11orf52	3.35214e-17	0.380258	0.455	0.102	5.61216e-13	1	HSPB2.C11orf52
SNX29	3.4529e-17	0.603496	0.83	0.405	5.78084e-13	1	SNX29
SERPINB8	3.50071e-17	0.607525	0.67	0.238	5.8609e-13	1	SERPINB8
NBPF8	3.51905e-17	0.375954	0.989	0.763	5.8916e-13	1	NBPF8
SYNJ2	3.55237e-17	0.517224	0.898	0.53	5.94737e-13	1	SYNJ2
LRP11	4.5003e-17	0.546719	0.648	0.237	7.53441e-13	1	LRP11
MORN2	4.93118e-17	0.588199	0.92	0.563	8.25578e-13	1	MORN2
RIN2	5.11785e-17	0.452439	0.989	0.768	8.5683e-13	1	RIN2
ZFHX3	5.14043e-17	0.508008	0.83	0.466	8.6061e-13	1	ZFHX3
PCSK7	5.51989e-17	0.532196	0.966	0.597	9.2414e-13	1	PCSK7
SPHK1	5.55812e-17	0.52975	0.602	0.194	9.3054e-13	1	SPHK1
CNRIP1	5.61409e-17	0.574678	0.716	0.242	9.3991e-13	1	CNRIP1
LIF	6.08986e-17	0.415104	0.386	0.081	1.01957e-12	1	LIF
BROX	7.79689e-17	0.286735	0.989	0.925	1.30536e-12	1	BROX
KAZN	7.91962e-17	0.499444	0.511	0.16	1.3259e-12	1	KAZN
MCTS1	8.1236e-17	0.323189	0.955	0.753	1.36005e-12	1	MCTS1
PTGS2	9.27174e-17	0.526843	0.557	0.167	1.55227e-12	1	PTGS2
POGLUT1	9.94394e-17	0.49899	0.943	0.688	1.66481e-12	1	POGLUT1
LAMP2	1.27919e-16	0.333526	1	0.919	2.14162e-12	1	LAMP2
OSMR	1.31321e-16	0.388382	0.659	0.213	2.19857e-12	1	OSMR
COL14A1	1.31701e-16	0.499488	0.409	0.1	2.20494e-12	1	COL14A1
RCN3	1.32013e-16	0.557596	0.943	0.489	2.21016e-12	1	RCN3
ITGA5	1.42445e-16	0.570257	0.989	0.659	2.38481e-12	1	ITGA5
DECR1	1.4888e-16	0.445902	0.977	0.794	2.49255e-12	1	DECR1
TAX1BP3	1.59471e-16	0.342202	0.977	0.827	2.66987e-12	1	TAX1BP3
MPV17	1.61033e-16	0.408808	0.977	0.788	2.69601e-12	1	MPV17
ITGAE	1.73401e-16	0.430852	0.943	0.742	2.90308e-12	1	ITGAE
PYGO1	1.7391e-16	0.282011	0.307	0.052	2.9116e-12	1	PYGO1
TCF7	2.26384e-16	0.370415	0.534	0.158	3.79013e-12	1	TCF7
MTPN	2.30072e-16	0.321864	0.989	0.858	3.85186e-12	1	MTPN
PXK1	2.35631e-16	0.569771	0.909	0.578	3.94494e-12	1	PXK
SERPINB2	2.49208e-16	0.577126	0.318	0.058	4.17225e-12	1	SERPINB2
GSTT2B	2.71862e-16	0.315374	0.557	0.179	4.55151e-12	1	GSTT2B
IGFBP5	2.73337e-16	0.409673	0.625	0.192	4.57621e-12	1	IGFBP5
LIMS2	2.775e-16	0.465749	0.557	0.18	4.6459e-12	1	LIMS2
KCTD12	2.81385e-16	0.639424	0.75	0.374	4.71094e-12	1	KCTD12
EGFR	2.99079e-16	0.471652	0.727	0.286	5.00718e-12	1	EGFR
DEGS1	3.43147e-16	0.381091	0.977	0.845	5.74497e-12	1	DEGS1
RDH5	3.45821e-16	0.603477	0.693	0.277	5.78974e-12	1	RDH5
IFFO1	4.02916e-16	0.492649	0.432	0.113	6.74563e-12	1	IFFO1
CCDC176	4.91187e-16	0.432417	0.534	0.16	8.22345e-12	1	CCDC176
POLR3GL	5.12082e-16	0.629627	0.784	0.399	8.57327e-12	1	POLR3GL
ILK	5.63922e-16	0.262899	0.989	0.926	9.44118e-12	1	ILK
SLC48A1	6.00157e-16	0.49819	0.932	0.63	1.00478e-11	1	SLC48A1
SLC4A7	6.55805e-16	0.56256	0.898	0.585	1.09795e-11	1	SLC4A7
PHLDA1	7.71817e-16	0.560365	0.932	0.528	1.29218e-11	1	PHLDA1
C3orf70	7.72332e-16	0.51648	0.432	0.123	1.29304e-11	1	C3orf70
GXYLT21	8.26237e-16	0.560008	0.943	0.567	1.38329e-11	1	GXYLT2
NOTCH2NL	9.03944e-16	0.333242	0.83	0.441	1.51338e-11	1	NOTCH2NL
CAV2	9.12548e-16	0.627761	0.909	0.443	1.52779e-11	1	CAV2
PPFIBP1	9.17066e-16	0.445707	1	0.776	1.53535e-11	1	PPFIBP1
COX20	1.00956e-15	0.380265	1	0.868	1.69021e-11	1	COX20
C6orf89	1.01917e-15	0.510226	0.955	0.556	1.70629e-11	1	C6orf89
STK17A	1.04754e-15	0.609714	0.773	0.419	1.7538e-11	1	STK17A
IRS1	1.11486e-15	0.261432	0.455	0.119	1.86649e-11	1	IRS1
UCHL1	1.32176e-15	0.588571	0.92	0.566	2.21289e-11	1	UCHL1
ARHGAP31	1.47042e-15	0.320852	0.523	0.16	2.46178e-11	1	ARHGAP31
KCTD20	1.47136e-15	0.50495	0.932	0.681	2.46335e-11	1	KCTD20
CXXC51	1.49705e-15	0.535246	0.898	0.504	2.50636e-11	1	CXXC5
ULBP2	1.52735e-15	0.499902	0.42	0.107	2.55709e-11	1	ULBP2
UBE2D4	1.57701e-15	0.548905	0.773	0.444	2.64023e-11	1	UBE2D4
SMAD3	1.61009e-15	0.500053	0.898	0.515	2.69561e-11	1	SMAD3
FZD7	1.70687e-15	0.528411	0.932	0.486	2.85764e-11	1	FZD7
TOX	1.76484e-15	0.494513	0.511	0.164	2.95469e-11	1	TOX
TXNDC5	1.79989e-15	0.535497	0.989	0.612	3.01337e-11	1	TXNDC5
CAPNS1	1.83955e-15	0.329627	0.989	0.885	3.07977e-11	1	CAPNS1
OSTF1	1.99116e-15	0.554065	0.886	0.533	3.33361e-11	1	OSTF1
LOXL4	2.00185e-15	0.323514	0.284	0.048	3.35149e-11	1	LOXL4
GREM2	2.09205e-15	0.311823	0.386	0.091	3.50252e-11	1	GREM2
MPRIP	2.27595e-15	0.357454	0.966	0.621	3.81039e-11	1	MPRIP
YWHAH	2.49506e-15	0.462381	1	0.758	4.17723e-11	1	YWHAH
TMEM117	2.62446e-15	0.396594	0.33	0.067	4.39387e-11	1	TMEM117
TICAM2	2.6465e-15	0.477288	0.466	0.134	4.43077e-11	1	TICAM2
FAM110B	2.89874e-15	0.510137	0.614	0.257	4.85307e-11	1	FAM110B
SRGAP1	3.0704e-15	0.508592	0.864	0.475	5.14046e-11	1	SRGAP1
NCEH1	3.38036e-15	0.524817	0.705	0.279	5.6594e-11	1	NCEH1
AMIGO2	4.23417e-15	0.485116	0.42	0.113	7.08884e-11	1	AMIGO2
TMEM14A	4.62294e-15	0.441394	0.989	0.727	7.73973e-11	1	TMEM14A
FAM98A	4.67491e-15	0.456349	0.977	0.704	7.82674e-11	1	FAM98A
TCEAL4	5.05175e-15	0.275879	0.989	0.923	8.45764e-11	1	TCEAL4
PLAT	5.65459e-15	0.53458	0.523	0.168	9.46692e-11	1	PLAT
TCEAL1	6.28798e-15	0.594621	0.75	0.374	1.05273e-10	1	TCEAL1
NME1	6.46623e-15	0.331224	1	0.868	1.08258e-10	1	NME1
TANK	7.88298e-15	0.446604	0.977	0.75	1.31977e-10	1	TANK
KIAA1217	8.90215e-15	0.489916	0.886	0.565	1.4904e-10	1	KIAA1217
RGS10	9.17378e-15	0.548761	0.818	0.399	1.53587e-10	1	RGS10
ITGA4	1.11403e-14	0.374228	0.261	0.044	1.8651e-10	1	ITGA4
CAPN2	1.16115e-14	0.481701	0.977	0.716	1.94399e-10	1	CAPN2
NF2	1.21163e-14	0.405759	0.966	0.765	2.0285e-10	1	NF2
ID41	1.28383e-14	0.588236	0.58	0.228	2.14938e-10	1	ID4
AVPI1	1.35888e-14	0.58575	0.727	0.347	2.27504e-10	1	AVPI1
SLC38A6	1.44991e-14	0.614281	0.761	0.437	2.42744e-10	1	SLC38A6
TMEM45A	1.4791e-14	0.59923	0.852	0.493	2.47631e-10	1	TMEM45A
JUND	1.51341e-14	0.356077	0.989	0.866	2.53375e-10	1	JUND
SMPD1	1.51733e-14	0.502459	0.83	0.427	2.54031e-10	1	SMPD1
EPRS	1.53616e-14	0.273245	1	0.925	2.57184e-10	1	EPRS
CPQ	1.55563e-14	0.646551	0.636	0.269	2.60444e-10	1	CPQ
PXDN	1.57333e-14	0.377563	0.989	0.787	2.63406e-10	1	PXDN
RAB13	1.59159e-14	0.311353	0.977	0.882	2.66464e-10	1	RAB13
FOXC2	1.60929e-14	0.415903	0.557	0.189	2.69427e-10	1	FOXC2
SLC16A7	1.80925e-14	0.503227	0.705	0.292	3.02905e-10	1	SLC16A7
LAMA4	1.90337e-14	0.528708	0.727	0.276	3.18663e-10	1	LAMA4
UBE2L6	1.92555e-14	0.559052	0.83	0.396	3.22375e-10	1	UBE2L6
TMEM43	2.03499e-14	0.447587	0.966	0.694	3.40697e-10	1	TMEM43
NCOA7	2.10142e-14	0.558602	0.852	0.521	3.5182e-10	1	NCOA7
FEM1B	2.15206e-14	0.513431	0.898	0.644	3.60299e-10	1	FEM1B
CBLB	2.51601e-14	0.497726	0.932	0.721	4.21231e-10	1	CBLB
SYNC	2.5712e-14	0.556542	0.852	0.569	4.3047e-10	1	SYNC
HES1	2.59571e-14	0.446785	0.92	0.575	4.34574e-10	1	HES1
PLIN3	2.74714e-14	0.399082	1	0.808	4.59926e-10	1	PLIN3
CAMK2D1	2.79787e-14	0.377976	1	0.888	4.6842e-10	1	CAMK2D
SMIM10	2.80015e-14	0.359604	0.42	0.115	4.68802e-10	1	SMIM10
SH3PXD2A	2.87861e-14	0.2956	0.455	0.138	4.81937e-10	1	SH3PXD2A
ATXN1	2.9924e-14	0.494227	0.92	0.592	5.00987e-10	1	ATXN1
GRIK2	3.05185e-14	0.358018	0.25	0.041	5.1094e-10	1	GRIK2
KLF12	3.23416e-14	0.563966	0.648	0.305	5.41462e-10	1	KLF12
RCN1	3.27213e-14	0.367352	0.966	0.84	5.4782e-10	1	RCN1
PLK2	3.92711e-14	0.567056	0.898	0.556	6.57478e-10	1	PLK2
MALL	4.7164e-14	0.54065	0.5	0.176	7.89619e-10	1	MALL
TWSG1	4.91947e-14	0.511994	0.83	0.505	8.23618e-10	1	TWSG1
SLC1A5	4.9741e-14	0.446531	0.932	0.691	8.32764e-10	1	SLC1A5
PIP4K2A	5.00169e-14	0.351612	0.977	0.665	8.37382e-10	1	PIP4K2A
SLC25A37	5.3774e-14	0.325248	0.989	0.837	9.00284e-10	1	SLC25A37
RND3	5.53666e-14	0.54691	0.966	0.556	9.26947e-10	1	RND3
NEDD4	5.62782e-14	0.527072	0.852	0.456	9.4221e-10	1	NEDD4
ADAMTS6	5.91515e-14	0.550613	0.602	0.242	9.90314e-10	1	ADAMTS6
SQRDL	6.00855e-14	0.530467	0.648	0.254	1.00595e-09	1	SQRDL
AKAP2	6.14601e-14	0.444497	1	0.701	1.02897e-09	1	AKAP2
FAM172A1	6.39532e-14	0.515099	0.898	0.666	1.0707e-09	1	FAM172A
GLT8D1	6.89612e-14	0.513981	0.943	0.617	1.15455e-09	1	GLT8D1
DACT1	6.96627e-14	0.342537	0.352	0.086	1.16629e-09	1	DACT1
SNTB2	7.47256e-14	0.297214	0.932	0.631	1.25106e-09	1	SNTB2
RASAL2	7.53938e-14	0.441641	0.784	0.406	1.26224e-09	1	RASAL2
SERPINE1	7.70919e-14	0.705572	0.989	0.409	1.29067e-09	1	SERPINE1
TACC1	7.85617e-14	0.517905	0.977	0.531	1.31528e-09	1	TACC1
DRAM1	8.40055e-14	0.485133	0.773	0.398	1.40642e-09	1	DRAM1
ATP13A3	9.2113e-14	0.412648	0.932	0.821	1.54216e-09	1	ATP13A3
PAPSS2	9.26162e-14	0.501258	0.932	0.515	1.55058e-09	1	PAPSS2
DTWD1	9.52164e-14	0.485141	0.943	0.72	1.59411e-09	1	DTWD1
LRP12	9.57637e-14	0.521452	0.784	0.406	1.60328e-09	1	LRP12
MET	1.00806e-13	0.509743	0.716	0.316	1.6877e-09	1	MET
RAP1B	1.01799e-13	0.261257	1	0.949	1.70431e-09	1	RAP1B
HCFC2	1.18141e-13	0.483034	0.773	0.379	1.97792e-09	1	HCFC2
TUSC3	1.19405e-13	0.52638	0.886	0.605	1.99907e-09	1	TUSC3
LDHA	1.31698e-13	0.257631	1	0.977	2.20489e-09	1	LDHA
ACSL4	1.3465e-13	0.462975	0.955	0.617	2.25432e-09	1	ACSL4
SEL1L3	1.36903e-13	0.564756	0.568	0.225	2.29204e-09	1	SEL1L3
STAT6	1.42583e-13	0.480838	0.784	0.389	2.38712e-09	1	STAT6
CUL4B	1.52179e-13	0.526657	0.875	0.623	2.54778e-09	1	CUL4B
HDDC2	1.69514e-13	0.395036	0.989	0.778	2.838e-09	1	HDDC2
SERTAD4	1.76037e-13	0.325104	0.273	0.052	2.94721e-09	1	SERTAD4
ENPP1	1.81489e-13	0.589561	0.636	0.322	3.03849e-09	1	ENPP1
DOK5	1.82498e-13	0.569523	0.443	0.145	3.05538e-09	1	DOK5
LBH	1.93193e-13	0.531044	0.841	0.45	3.23444e-09	1	LBH
NLRP1	1.98815e-13	0.353207	0.545	0.187	3.32856e-09	1	NLRP1
TEAD1	2.09734e-13	0.449593	0.909	0.636	3.51137e-09	1	TEAD1
RARRES3	2.39163e-13	0.388524	0.318	0.07	4.00407e-09	1	RARRES3
MAP7D3	2.47312e-13	0.510061	0.852	0.498	4.1405e-09	1	MAP7D3
ARHGAP35	2.72877e-13	0.416115	0.807	0.447	4.56851e-09	1	ARHGAP35
C1GALT1C1	2.74468e-13	0.498723	0.909	0.591	4.59515e-09	1	C1GALT1C1
STAM2	2.7586e-13	0.447399	0.932	0.656	4.61845e-09	1	STAM2
COL6A2	2.79077e-13	0.341399	0.807	0.347	4.67231e-09	1	COL6A2
LIN7C	2.79493e-13	0.277069	0.977	0.898	4.67928e-09	1	LIN7C
ENC1	2.89178e-13	0.524146	0.75	0.373	4.84142e-09	1	ENC1
PDGFRA1	3.08929e-13	0.500364	0.989	0.62	5.1721e-09	1	PDGFRA
TXNDC9	3.13822e-13	0.339485	0.977	0.82	5.25401e-09	1	TXNDC9
TNFRSF1A	3.16902e-13	0.462725	0.943	0.604	5.30558e-09	1	TNFRSF1A
TBC1D8B	3.25021e-13	0.473837	0.682	0.292	5.44151e-09	1	TBC1D8B
EHBP1	3.29455e-13	0.435247	0.955	0.763	5.51573e-09	1	EHBP1
CCSER2	3.70208e-13	0.507088	0.898	0.601	6.19802e-09	1	CCSER2
FIBP	4.16761e-13	0.266278	0.966	0.846	6.97742e-09	1	FIBP
PLEKHA2	4.29556e-13	0.41517	0.455	0.144	7.19162e-09	1	PLEKHA2
NAA38	4.57307e-13	0.322966	0.966	0.862	7.65623e-09	1	NAA38
SKA2	4.86946e-13	0.393103	1	0.775	8.15245e-09	1	SKA2
[truncated: 14,631 more rows]

## Sheet: table s3-2 GO-based-FC-DEF
	p_val	avg_log2FC	pct.1	pct.2	p_val_adj	cluster	gene
go-axis-specification	8.5925e-48	0.282163	0.926	0.391	7.94721e-44	0	go-axis-specification
go-anterior-posterior-axis-specification	2.77367e-46	0.316482	0.966	0.444	2.56536e-42	0	go-anterior-posterior-axis-specification
go-primitive-streak-formation	3.21647e-44	0.325756	0.812	0.346	2.97491e-40	0	go-primitive-streak-formation
go-rna-splicing	2.79904e-38	0.273606	1	1	2.58883e-34	0	go-rna-splicing
go-gastrulation-with-mouth-forming-second	1.33967e-36	0.581861	0.972	0.672	1.23906e-32	0	go-gastrulation-with-mouth-forming-second
go-stem-cell-differentiation	6.66758e-34	0.476605	1	1	6.16684e-30	0	go-stem-cell-differentiation
go-negative-regulation-of-transforming-growth-factor-beta-production	2.02891e-33	0.311566	0.989	0.696	1.87653e-29	0	go-negative-regulation-of-transforming-growth-factor-beta-production
go-rna-splicing-via-transesterification-reactions	1.12811e-32	0.266808	1	1	1.04339e-28	0	go-rna-splicing-via-transesterification-reactions
go-cardiac-muscle-cell-cardiac-muscle-cell-adhesion	3.51183e-32	0.401205	0.966	0.516	3.24809e-28	0	go-cardiac-muscle-cell-cardiac-muscle-cell-adhesion
go-embryonic-placenta-morphogenesis	1.49366e-30	0.414995	0.994	0.676	1.38149e-26	0	go-embryonic-placenta-morphogenesis
go-lsm2-8-complex	2.95657e-30	0.405094	0.994	0.98	2.73453e-26	0	go-lsm2-8-complex
go-crd-mediated-mrna-stability-complex	1.05516e-28	0.370801	0.994	0.997	9.75914e-25	0	go-crd-mediated-mrna-stability-complex
go-gastrulation	1.53665e-28	0.773059	0.989	0.993	1.42124e-24	0	go-gastrulation
go-maintenance-of-cell-number	1.63123e-28	0.401444	1	1	1.50873e-24	0	go-maintenance-of-cell-number
go-embryo-development	4.01475e-28	0.483861	1	1	3.71324e-24	0	go-embryo-development
go-somatic-stem-cell-population-maintenance	1.05437e-27	0.703415	1	0.995	9.75187e-24	0	go-somatic-stem-cell-population-maintenance
go-histone-h3-k4-methylation	1.3791e-27	0.486988	1	0.993	1.27553e-23	0	go-histone-h3-k4-methylation
go-methylosome	1.91146e-27	0.276598	0.994	1	1.76791e-23	0	go-methylosome
go-mitochondrial-fragmentation-involved-in-apoptotic-process	3.47485e-26	0.602409	0.994	0.998	3.21389e-22	0	go-mitochondrial-fragmentation-involved-in-apoptotic-process
go-dna-binding-transcription-factor-activity	4.57992e-26	0.425922	0.761	0.414	4.23596e-22	0	go-dna-binding-transcription-factor-activity
go-epithelial-tube-morphogenesis	9.09214e-26	0.523007	0.972	0.894	8.40932e-22	0	go-epithelial-tube-morphogenesis
go-tube-formation	9.23862e-26	0.737047	0.994	0.972	8.5448e-22	0	go-tube-formation
go-sex-differentiation	3.56844e-25	0.524039	1	0.918	3.30045e-21	0	go-sex-differentiation
go-protein-localization-to-cytoplasmic-stress-granule	7.37645e-25	0.308735	1	0.998	6.82248e-21	0	go-protein-localization-to-cytoplasmic-stress-granule
go-g-quadruplex-rna-binding	1.08916e-24	0.559934	0.96	0.9	1.00737e-20	0	go-g-quadruplex-rna-binding
go-dna-integration	2.11224e-24	0.253125	0.932	0.727	1.95361e-20	0	go-dna-integration
go-crd-mediated-mrna-stabilization	2.71031e-24	0.444556	0.989	0.983	2.50677e-20	0	go-crd-mediated-mrna-stabilization
go-neural-crest-formation	5.51072e-24	0.274262	0.977	0.85	5.09686e-20	0	go-neural-crest-formation
go-morphogenesis-of-a-polarized-epithelium	7.80164e-24	0.310344	1	1	7.21573e-20	0	go-morphogenesis-of-a-polarized-epithelium
go-embryonic-morphogenesis	9.15472e-24	0.455169	0.96	0.76	8.4672e-20	0	go-embryonic-morphogenesis
go-spliceosomal-tri-snrnp-complex	9.25313e-24	0.337573	0.994	1	8.55822e-20	0	go-spliceosomal-tri-snrnp-complex
go-pre-mrna-binding	1.79112e-23	0.582083	1	0.998	1.65661e-19	0	go-pre-mrna-binding
go-cell-cell-adhesion-mediator-activity	2.14602e-23	0.512563	1	0.99	1.98485e-19	0	go-cell-cell-adhesion-mediator-activity
go-polysome	4.75837e-23	0.393244	1	1	4.40102e-19	0	go-polysome
go-eukaryotic-initiation-factor-4e-binding	8.7921e-23	0.59292	0.994	0.998	8.13181e-19	0	go-eukaryotic-initiation-factor-4e-binding
go-regulation-of-histone-h3-k4-methylation	9.79403e-23	0.540477	0.994	0.99	9.05849e-19	0	go-regulation-of-histone-h3-k4-methylation
go-protein-methylation	1.48406e-22	0.33243	1	0.998	1.37261e-18	0	go-protein-methylation
go-cytoskeletal-anchoring-at-plasma-membrane	1.78143e-22	0.414688	0.972	0.928	1.64764e-18	0	go-cytoskeletal-anchoring-at-plasma-membrane
go-regulation-of-transcription-initiation-from-rna-polymerase-ii-promoter	1.88137e-22	0.322322	1	0.998	1.74008e-18	0	go-regulation-of-transcription-initiation-from-rna-polymerase-ii-promoter
go-mrna-3-utr-binding	2.28728e-22	0.266868	1	1	2.11551e-18	0	go-mrna-3-utr-binding
go-ventricular-septum-development	2.37278e-22	0.328295	0.949	0.74	2.19459e-18	0	go-ventricular-septum-development
go-morphogenesis-of-embryonic-epithelium	2.80042e-22	0.560669	0.994	0.907	2.5901e-18	0	go-morphogenesis-of-embryonic-epithelium
go-maintenance-of-dna-repeat-elements	3.36587e-22	0.339931	0.943	0.799	3.1131e-18	0	go-maintenance-of-dna-repeat-elements
go-male-sex-differentiation	4.2076e-22	0.590954	1	0.975	3.89161e-18	0	go-male-sex-differentiation
go-in-utero-embryonic-development	4.30427e-22	0.295441	1	1	3.98102e-18	0	go-in-utero-embryonic-development
go-gland-development	4.90889e-22	0.49377	1	0.95	4.54024e-18	0	go-gland-development
go-negative-regulation-of-transcription-regulatory-region-dna-binding	5.1046e-22	0.394431	0.983	0.955	4.72124e-18	0	go-negative-regulation-of-transcription-regulatory-region-dna-binding
go-cell-adhesive-protein-binding-involved-in-bundle-of-his-cell-purkinje-myocyte-communication	5.43384e-22	0.295113	0.858	0.464	5.02576e-18	0	go-cell-adhesive-protein-binding-involved-in-bundle-of-his-cell-purkinje-myocyte-communication
go-regulation-of-retinoic-acid-receptor-signaling-pathway	5.6367e-22	0.487658	0.994	0.978	5.21339e-18	0	go-regulation-of-retinoic-acid-receptor-signaling-pathway
go-negative-regulation-of-rna-splicing	7.35272e-22	0.327626	1	1	6.80053e-18	0	go-negative-regulation-of-rna-splicing
go-regulation-of-histone-methylation	8.49584e-22	0.35732	1	1	7.8578e-18	0	go-regulation-of-histone-methylation
go-lsm1-7-pat1-complex	1.24041e-21	0.354279	0.989	0.938	1.14725e-17	0	go-lsm1-7-pat1-complex
go-co-smad-binding	1.3897e-21	0.644293	0.955	0.927	1.28533e-17	0	go-co-smad-binding
go-lipoprotein-catabolic-process	1.49919e-21	0.256923	0.983	0.87	1.3866e-17	0	go-lipoprotein-catabolic-process
go-lipoprotein-particle-receptor-binding	1.69355e-21	0.572687	0.994	0.997	1.56636e-17	0	go-lipoprotein-particle-receptor-binding
go-spliceosomal-complex-assembly	1.72496e-21	0.328459	1	1	1.59542e-17	0	go-spliceosomal-complex-assembly
go-peptidyl-lysine-methylation	1.93296e-21	0.420548	1	0.998	1.7878e-17	0	go-peptidyl-lysine-methylation
go-u6-snrnp	2.87595e-21	0.575239	0.994	0.988	2.65996e-17	0	go-u6-snrnp
go-translation-initiation-factor-binding	3.06597e-21	0.309837	1	1	2.83572e-17	0	go-translation-initiation-factor-binding
go-negative-regulation-of-cellular-amide-metabolic-process	3.38353e-21	0.502098	1	1	3.12942e-17	0	go-negative-regulation-of-cellular-amide-metabolic-process
go-genetic-imprinting	3.92376e-21	0.337969	1	0.96	3.62908e-17	0	go-genetic-imprinting
go-sm-like-protein-family-complex	5.48959e-21	0.331795	1	1	5.07732e-17	0	go-sm-like-protein-family-complex
go-homotypic-cell-cell-adhesion	6.97307e-21	0.453329	0.994	1	6.44939e-17	0	go-homotypic-cell-cell-adhesion
go-morphogenesis-of-an-epithelium	8.50717e-21	0.379103	1	1	7.86828e-17	0	go-morphogenesis-of-an-epithelium
go-developmental-process-involved-in-reproduction	2.09765e-20	0.385511	0.966	0.844	1.94012e-16	0	go-developmental-process-involved-in-reproduction
go-lysine-acetylated-histone-binding	2.69179e-20	0.40088	0.994	1	2.48963e-16	0	go-lysine-acetylated-histone-binding
go-cellular-response-to-estrogen-stimulus	6.88261e-20	0.268948	0.949	0.854	6.36572e-16	0	go-cellular-response-to-estrogen-stimulus
go-establishment-of-cell-polarity	8.66152e-20	0.31004	1	1	8.01104e-16	0	go-establishment-of-cell-polarity
go-atpase-complex	1.32895e-19	0.35205	1	1	1.22915e-15	0	go-atpase-complex
go-neural-tube-formation	1.99953e-19	0.529078	1	0.998	1.84937e-15	0	go-neural-tube-formation
go-methyltransferase-complex	2.73415e-19	0.27822	1	1	2.52881e-15	0	go-methyltransferase-complex
go-neural-tube-development	3.44698e-19	0.559591	1	0.97	3.18812e-15	0	go-neural-tube-development
go-reproductive-system-development	3.53327e-19	0.502371	1	0.998	3.26792e-15	0	go-reproductive-system-development
go-response-to-indole-3-methanol	4.35659e-19	0.36136	0.938	0.73	4.02941e-15	0	go-response-to-indole-3-methanol
go-chloride-channel-inhibitor-activity	4.76331e-19	0.292817	0.966	0.923	4.40558e-15	0	go-chloride-channel-inhibitor-activity
go-transforming-growth-factor-beta2-production	5.12222e-19	0.271723	0.92	0.86	4.73754e-15	0	go-transforming-growth-factor-beta2-production
go-regulation-of-chromatin-organization	5.2547e-19	0.258722	1	1	4.86007e-15	0	go-regulation-of-chromatin-organization
go-u12-type-spliceosomal-complex	5.27282e-19	0.268491	1	1	4.87683e-15	0	go-u12-type-spliceosomal-complex
go-u4-snrnp	5.60015e-19	0.251654	0.994	0.998	5.17958e-15	0	go-u4-snrnp
go-urogenital-system-development	6.42676e-19	0.435795	0.949	0.855	5.94411e-15	0	go-urogenital-system-development
go-cell-cell-junction	7.589e-19	0.408122	1	0.998	7.01907e-15	0	go-cell-cell-junction
go-positive-regulation-of-growth	7.66697e-19	0.345676	1	0.985	7.09118e-15	0	go-positive-regulation-of-growth
go-positive-regulation-of-histone-h3-k4-methylation	8.41035e-19	0.44164	1	0.997	7.77873e-15	0	go-positive-regulation-of-histone-h3-k4-methylation
go-renal-system-development	9.74785e-19	0.41173	0.96	0.857	9.01579e-15	0	go-renal-system-development
go-retinoic-acid-receptor-signaling-pathway	9.90298e-19	0.366091	0.994	0.967	9.15927e-15	0	go-retinoic-acid-receptor-signaling-pathway
go-atg1-ulk1-kinase-complex	1.17842e-18	0.417818	0.949	0.93	1.08992e-14	0	go-atg1-ulk1-kinase-complex
go-cardiac-septum-development	1.26948e-18	0.289922	0.955	0.822	1.17414e-14	0	go-cardiac-septum-development
go-intercalated-disc	1.29365e-18	0.286787	0.994	0.947	1.1965e-14	0	go-intercalated-disc
go-rna-polymerase-ii-transcription-factor-binding	1.35515e-18	0.313856	0.977	0.932	1.25338e-14	0	go-rna-polymerase-ii-transcription-factor-binding
go-fascia-adherens	1.40262e-18	0.429397	0.972	0.98	1.29728e-14	0	go-fascia-adherens
go-negative-regulation-of-mrna-splicing-via-spliceosome	2.17355e-18	0.310901	1	1	2.01032e-14	0	go-negative-regulation-of-mrna-splicing-via-spliceosome
go-ribonucleoprotein-complex	2.24833e-18	0.545919	1	1	2.07948e-14	0	go-ribonucleoprotein-complex
go-u6-snrna-binding	2.57368e-18	0.319672	1	0.995	2.38039e-14	0	go-u6-snrna-binding
go-nucleus-localization	3.00402e-18	0.367067	0.972	0.958	2.77842e-14	0	go-nucleus-localization
go-histone-methylation	3.04637e-18	0.33841	1	1	2.81759e-14	0	go-histone-methylation
go-regulation-of-histone-h3-k9-acetylation	3.81693e-18	0.343498	0.949	0.87	3.53028e-14	0	go-regulation-of-histone-h3-k9-acetylation
go-cell-cell-signaling-by-wnt	8.37058e-18	0.288229	1	1	7.74195e-14	0	go-cell-cell-signaling-by-wnt
go-beta-catenin-binding	8.76456e-18	0.38767	0.994	0.97	8.10634e-14	0	go-beta-catenin-binding
go-head-development	1.00149e-17	0.371465	1	1	9.26277e-14	0	go-head-development
go-apical-junction-complex	1.19355e-17	0.458701	0.989	0.982	1.10392e-13	0	go-apical-junction-complex
go-tight-junction	1.212e-17	0.439398	0.989	0.96	1.12098e-13	0	go-tight-junction
go-epithelium-development	1.74366e-17	0.427496	0.994	0.797	1.61271e-13	0	go-epithelium-development
go-u1-snrnp	2.05028e-17	0.488051	1	1	1.8963e-13	0	go-u1-snrnp
go-response-to-carbohydrate	2.0638e-17	0.492574	1	1	1.9088e-13	0	go-response-to-carbohydrate
go-low-density-lipoprotein-particle-receptor-catabolic-process	2.26256e-17	0.451967	1	1	2.09264e-13	0	go-low-density-lipoprotein-particle-receptor-catabolic-process
go-chaperonin-containing-t-complex	3.02832e-17	0.314177	0.994	1	2.8009e-13	0	go-chaperonin-containing-t-complex
go-cell-surface-receptor-signaling-pathway-involved-in-cell-cell-signaling	3.13918e-17	0.329487	1	1	2.90342e-13	0	go-cell-surface-receptor-signaling-pathway-involved-in-cell-cell-signaling
go-positive-regulation-of-chromatin-organization	4.25124e-17	0.284244	1	1	3.93197e-13	0	go-positive-regulation-of-chromatin-organization
go-positive-regulation-of-transcription-initiation-from-rna-polymerase-ii-promoter	4.47836e-17	0.367287	1	0.997	4.14204e-13	0	go-positive-regulation-of-transcription-initiation-from-rna-polymerase-ii-promoter
go-positive-regulation-of-histone-methylation	6.80419e-17	0.361408	1	1	6.29319e-13	0	go-positive-regulation-of-histone-methylation
go-wnt-signaling-pathway-calcium-modulating-pathway	6.99322e-17	0.297227	0.983	0.988	6.46803e-13	0	go-wnt-signaling-pathway-calcium-modulating-pathway
go-actin-filament-severing	1.48167e-16	0.352475	0.977	1	1.3704e-12	0	go-actin-filament-severing
go-chromatin-remodeling	1.52982e-16	0.323954	1	1	1.41493e-12	0	go-chromatin-remodeling
go-positive-regulation-of-cytoplasmic-translation	2.62054e-16	0.453842	1	0.995	2.42374e-12	0	go-positive-regulation-of-cytoplasmic-translation
go-rna-3-end-processing	3.92868e-16	0.276933	1	1	3.63363e-12	0	go-rna-3-end-processing
go-midbrain-development	4.57012e-16	0.351848	1	1	4.22691e-12	0	go-midbrain-development
go-small-protein-activating-enzyme-binding	9.27662e-16	0.329709	0.983	0.962	8.57994e-12	0	go-small-protein-activating-enzyme-binding
go-phosphatase-activator-activity	9.38979e-16	0.389241	1	1	8.68462e-12	0	go-phosphatase-activator-activity
go-negative-regulation-of-chromatin-organization	9.47793e-16	0.388079	1	1	8.76613e-12	0	go-negative-regulation-of-chromatin-organization
go-dynein-complex	9.77673e-16	0.282565	0.983	0.987	9.04249e-12	0	go-dynein-complex
go-fibroblast-growth-factor-receptor-signaling-pathway	1.16367e-15	0.33655	1	1	1.07628e-11	0	go-fibroblast-growth-factor-receptor-signaling-pathway
go-regulation-of-establishment-or-maintenance-of-cell-polarity	1.20454e-15	0.423796	0.955	0.957	1.11408e-11	0	go-regulation-of-establishment-or-maintenance-of-cell-polarity
go-rna-metabolic-process	1.26535e-15	0.348005	1	1	1.17032e-11	0	go-rna-metabolic-process
go-negative-regulation-of-androgen-receptor-signaling-pathway	1.33268e-15	0.323579	0.977	0.968	1.2326e-11	0	go-negative-regulation-of-androgen-receptor-signaling-pathway
go-embryonic-placenta-development	1.66044e-15	0.292055	1	0.967	1.53574e-11	0	go-embryonic-placenta-development
go-response-to-fibroblast-growth-factor	1.92645e-15	0.411348	1	1	1.78177e-11	0	go-response-to-fibroblast-growth-factor
go-viral-latency	2.23312e-15	0.327567	1	0.998	2.06541e-11	0	go-viral-latency
go-chromatin-disassembly	2.4671e-15	0.438906	0.994	0.978	2.28182e-11	0	go-chromatin-disassembly
go-gtpase-activating-protein-binding	3.08093e-15	0.363701	0.983	0.983	2.84955e-11	0	go-gtpase-activating-protein-binding
go-histone-methyltransferase-complex	3.93391e-15	0.293066	1	0.998	3.63847e-11	0	go-histone-methyltransferase-complex
go-morphogenesis-of-an-epithelial-sheet	5.10209e-15	0.34964	0.994	0.992	4.71893e-11	0	go-morphogenesis-of-an-epithelial-sheet
go-response-to-epidermal-growth-factor	5.20381e-15	0.251294	1	1	4.813e-11	0	go-response-to-epidermal-growth-factor
go-regulation-of-lamellipodium-morphogenesis	6.20255e-15	0.295626	0.949	0.889	5.73674e-11	0	go-regulation-of-lamellipodium-morphogenesis
go-embryo-development-ending-in-birth-or-egg-hatching	6.3556e-15	0.285093	1	1	5.8783e-11	0	go-embryo-development-ending-in-birth-or-egg-hatching
go-forebrain-development	7.24927e-15	0.260661	0.966	0.912	6.70485e-11	0	go-forebrain-development
go-chromatin-mediated-maintenance-of-transcription	9.95744e-15	0.264686	0.977	0.92	9.20963e-11	0	go-chromatin-mediated-maintenance-of-transcription
go-axon-development	1.22562e-14	0.319135	0.943	0.877	1.13357e-10	0	go-axon-development
go-peptidyl-methionine-modification	1.37625e-14	0.442895	1	0.993	1.2729e-10	0	go-peptidyl-methionine-modification
go-myosin-v-binding	1.43503e-14	0.351639	0.994	0.997	1.32726e-10	0	go-myosin-v-binding
go-swi-snf-complex	2.2068e-14	0.376426	0.977	0.94	2.04107e-10	0	go-swi-snf-complex
go-rs-domain-binding	2.62228e-14	0.502624	0.977	0.978	2.42534e-10	0	go-rs-domain-binding
go-response-to-hepatocyte-growth-factor	2.66888e-14	0.272199	0.972	0.977	2.46845e-10	0	go-response-to-hepatocyte-growth-factor
go-regulation-of-extent-of-cell-growth	3.08139e-14	0.347551	0.989	0.957	2.84998e-10	0	go-regulation-of-extent-of-cell-growth
go-rna-polymerase-ii-activating-transcription-factor-binding	5.04602e-14	0.269038	0.994	0.985	4.66707e-10	0	go-rna-polymerase-ii-activating-transcription-factor-binding
go-tissue-morphogenesis	6.19969e-14	0.386134	1	0.998	5.7341e-10	0	go-tissue-morphogenesis
go-positive-regulation-of-transcription-from-rna-polymerase-ii-promoter-involved-in-cellular-response-to-chemical-stimulus	7.51239e-14	0.407799	1	0.997	6.94821e-10	0	go-positive-regulation-of-transcription-from-rna-polymerase-ii-promoter-involved-in-cellular-response-to-chemical-stimulus
go-regulation-of-rna-polymerase-ii-regulatory-region-sequence-specific-dna-binding	8.43246e-14	0.275286	0.977	0.972	7.79918e-10	0	go-regulation-of-rna-polymerase-ii-regulatory-region-sequence-specific-dna-binding
go-negative-regulation-of-rna-catabolic-process	1.03321e-13	0.353109	1	1	9.55616e-10	0	go-negative-regulation-of-rna-catabolic-process
go-nuclear-transcribed-mrna-catabolic-process	1.05128e-13	0.331158	1	1	9.72325e-10	0	go-nuclear-transcribed-mrna-catabolic-process
go-translocon-complex	1.93868e-13	0.273565	1	0.998	1.79309e-09	0	go-translocon-complex
go-snrna-binding	2.10008e-13	0.278762	1	1	1.94237e-09	0	go-snrna-binding
go-saga-complex	2.12268e-13	0.25865	0.977	0.968	1.96327e-09	0	go-saga-complex
go-actin-based-cell-projection	2.38706e-13	0.323132	0.972	0.983	2.2078e-09	0	go-actin-based-cell-projection
go-translocation-of-molecules-into-host	2.40458e-13	0.319998	0.994	0.995	2.224e-09	0	go-translocation-of-molecules-into-host
go-regulation-of-morphogenesis-of-an-epithelium	2.61511e-13	0.263039	1	1	2.41872e-09	0	go-regulation-of-morphogenesis-of-an-epithelium
go-protein-phosphatase-type-2a-complex	2.83963e-13	0.351901	0.989	0.992	2.62637e-09	0	go-protein-phosphatase-type-2a-complex
go-negative-regulation-of-intracellular-steroid-hormone-receptor-signaling-pathway	2.91315e-13	0.301285	1	0.997	2.69437e-09	0	go-negative-regulation-of-intracellular-steroid-hormone-receptor-signaling-pathway
go-central-nervous-system-development	3.9544e-13	0.449983	0.989	0.992	3.65742e-09	0	go-central-nervous-system-development
go-positive-regulation-of-chromatin-silencing	4.80894e-13	0.305812	0.983	0.982	4.44779e-09	0	go-positive-regulation-of-chromatin-silencing
go-canonical-wnt-signaling-pathway	5.57374e-13	0.252501	1	1	5.15515e-09	0	go-canonical-wnt-signaling-pathway
go-tube-closure	8.37971e-13	0.412515	1	0.975	7.75039e-09	0	go-tube-closure
go-ventricular-system-development	8.62897e-13	0.428288	0.994	0.982	7.98093e-09	0	go-ventricular-system-development
go-costamere	9.06013e-13	0.330527	1	0.995	8.37971e-09	0	go-costamere
go-establishment-of-viral-latency	1.16931e-12	0.351222	1	0.998	1.0815e-08	0	go-establishment-of-viral-latency
go-demethylation	1.19877e-12	0.322643	1	0.99	1.10874e-08	0	go-demethylation
go-spliceosomal-snrnp-assembly	1.21212e-12	0.259519	1	1	1.12109e-08	0	go-spliceosomal-snrnp-assembly
go-mll3-4-complex	1.25974e-12	0.295195	0.983	0.927	1.16513e-08	0	go-mll3-4-complex
go-low-density-lipoprotein-particle-receptor-binding	1.52189e-12	0.373649	0.994	0.998	1.4076e-08	0	go-low-density-lipoprotein-particle-receptor-binding
go-regulation-of-peptidyl-lysine-acetylation	2.48194e-12	0.309599	1	1	2.29554e-08	0	go-regulation-of-peptidyl-lysine-acetylation
go-plasma-membrane-bounded-cell-projection-cytoplasm	2.73026e-12	0.381992	1	0.992	2.52521e-08	0	go-plasma-membrane-bounded-cell-projection-cytoplasm
go-mirna-binding	2.74518e-12	0.340932	1	0.997	2.53902e-08	0	go-mirna-binding
go-positive-regulation-of-mrna-splicing-via-spliceosome	2.82859e-12	0.384019	1	0.998	2.61616e-08	0	go-positive-regulation-of-mrna-splicing-via-spliceosome
go-histone-pre-mrna-3-end-processing-complex	3.48399e-12	0.342303	0.949	0.977	3.22234e-08	0	go-histone-pre-mrna-3-end-processing-complex
go-rna-polymerase-ii-c-terminal-domain-binding	4.46871e-12	0.250816	0.943	0.937	4.13311e-08	0	go-rna-polymerase-ii-c-terminal-domain-binding
go-negative-regulation-of-dna-binding	4.58012e-12	0.408559	1	0.998	4.23616e-08	0	go-negative-regulation-of-dna-binding
go-regulation-of-histone-h3-k27-methylation	4.60308e-12	0.256394	0.966	0.945	4.25739e-08	0	go-regulation-of-histone-h3-k27-methylation
go-regulation-of-nuclear-transcribed-mrna-catabolic-process-deadenylation-dependent-decay	6.10589e-12	0.324646	1	1	5.64734e-08	0	go-regulation-of-nuclear-transcribed-mrna-catabolic-process-deadenylation-dependent-decay
go-regulation-of-mammary-gland-epithelial-cell-proliferation	6.18668e-12	0.250329	0.989	0.975	5.72206e-08	0	go-regulation-of-mammary-gland-epithelial-cell-proliferation
go-regulation-of-nuclear-transcribed-mrna-poly-a-tail-shortening	6.54613e-12	0.279791	1	0.998	6.05451e-08	0	go-regulation-of-nuclear-transcribed-mrna-poly-a-tail-shortening
go-low-density-lipoprotein-receptor-particle-metabolic-process	6.8141e-12	0.321262	1	1	6.30236e-08	0	go-low-density-lipoprotein-receptor-particle-metabolic-process
go-protein-dna-complex-subunit-organization	8.57113e-12	0.250064	1	1	7.92744e-08	0	go-protein-dna-complex-subunit-organization
go-regulation-of-androgen-receptor-signaling-pathway	1.04327e-11	0.312336	1	0.998	9.64924e-08	0	go-regulation-of-androgen-receptor-signaling-pathway
go-cyclin-binding	1.17673e-11	0.312158	0.983	0.985	1.08836e-07	0	go-cyclin-binding
go-cadherin-binding-involved-in-cell-cell-adhesion	1.52591e-11	0.313237	1	1	1.41132e-07	0	go-cadherin-binding-involved-in-cell-cell-adhesion
go-mrna-5-utr-binding	1.69056e-11	0.250495	1	1	1.5636e-07	0	go-mrna-5-utr-binding
go-cellular-response-to-x-ray	1.87748e-11	0.377959	1	0.998	1.73648e-07	0	go-cellular-response-to-x-ray
go-rna-stabilization	2.13976e-11	0.375106	1	0.998	1.97907e-07	0	go-rna-stabilization
go-posttranscriptional-regulation-of-gene-expression	2.42256e-11	0.439137	0.852	0.77	2.24062e-07	0	go-posttranscriptional-regulation-of-gene-expression
go-signal-peptidase-complex	2.63561e-11	0.273789	0.983	0.987	2.43767e-07	0	go-signal-peptidase-complex
go-negative-regulation-of-gene-expression-epigenetic	3.46949e-11	0.360214	1	0.998	3.20893e-07	0	go-negative-regulation-of-gene-expression-epigenetic
go-transcytosis	4.93737e-11	0.256426	1	1	4.56658e-07	0	go-transcytosis
go-tho-complex	5.38597e-11	0.290184	0.96	0.915	4.98148e-07	0	go-tho-complex
go-nls-bearing-protein-import-into-nucleus	8.80693e-11	0.271687	1	0.993	8.14553e-07	0	go-nls-bearing-protein-import-into-nucleus
go-lamellipodium-morphogenesis	1.31512e-10	0.290296	0.989	0.998	1.21635e-06	0	go-lamellipodium-morphogenesis
go-u1-snrnp-binding	1.51165e-10	0.258687	0.972	0.96	1.39812e-06	0	go-u1-snrnp-binding
go-amyloid-precursor-protein-biosynthetic-process	1.5205e-10	0.274652	0.915	0.943	1.40631e-06	0	go-amyloid-precursor-protein-biosynthetic-process
go-neurotrophin-trk-receptor-binding	2.4508e-10	0.33601	0.926	0.927	2.26674e-06	0	go-neurotrophin-trk-receptor-binding
go-intracellular-estrogen-receptor-signaling-pathway	2.79561e-10	0.28256	1	0.998	2.58566e-06	0	go-intracellular-estrogen-receptor-signaling-pathway
go-protein-dna-complex-disassembly	3.67233e-10	0.350186	0.983	0.977	3.39654e-06	0	go-protein-dna-complex-disassembly
go-telencephalon-development	4.35843e-10	0.268031	1	0.973	4.03112e-06	0	go-telencephalon-development
go-tubulin-binding	4.73609e-10	0.26469	1	1	4.38041e-06	0	go-tubulin-binding
go-cilium-organization	6.17149e-10	0.352091	1	0.988	5.70801e-06	0	go-cilium-organization
go-atf6-mediated-unfolded-protein-response	1.35824e-09	0.265651	1	1	1.25623e-05	0	go-atf6-mediated-unfolded-protein-response
go-mrna-cis-splicing-via-spliceosome	1.64159e-09	0.349362	1	1	1.51831e-05	0	go-mrna-cis-splicing-via-spliceosome
go-modulation-by-symbiont-of-host-cellular-process	1.90006e-09	0.273002	0.994	0.997	1.75737e-05	0	go-modulation-by-symbiont-of-host-cellular-process
go-sequence-specific-mrna-binding	2.0294e-09	0.304045	1	0.995	1.877e-05	0	go-sequence-specific-mrna-binding
go-cell-cell-adherens-junction	2.59531e-09	0.261061	1	1	2.40041e-05	0	go-cell-cell-adherens-junction
go-filopodium	3.55247e-09	0.280997	0.989	0.998	3.28568e-05	0	go-filopodium
go-nucleosome-organization	4.03415e-09	0.388444	1	0.992	3.73119e-05	0	go-nucleosome-organization
go-atp-dependent-chromatin-remodeling	4.26376e-09	0.293602	1	0.998	3.94355e-05	0	go-atp-dependent-chromatin-remodeling
go-oxidoreductase-activity-acting-on-a-sulfur-group-of-donors-nad-p-as-acceptor	5.55247e-09	0.257721	1	1	5.13548e-05	0	go-oxidoreductase-activity-acting-on-a-sulfur-group-of-donors-nad-p-as-acceptor
go-regulation-of-intracellular-estrogen-receptor-signaling-pathway	5.62894e-09	0.290469	0.983	0.987	5.2062e-05	0	go-regulation-of-intracellular-estrogen-receptor-signaling-pathway
go-histone-h3-k4-trimethylation	7.2171e-09	0.276941	1	0.997	6.67509e-05	0	go-histone-h3-k4-trimethylation
go-regulation-of-dna-binding	7.8849e-09	0.307212	1	1	7.29275e-05	0	go-regulation-of-dna-binding
go-centriolar-satellite	7.93772e-09	0.334512	0.977	0.982	7.3416e-05	0	go-centriolar-satellite
go-positive-regulation-of-cell-growth	8.06559e-09	0.266778	1	1	7.45986e-05	0	go-positive-regulation-of-cell-growth
go-transcription-dependent-tethering-of-rna-polymerase-ii-gene-dna-at-nuclear-periphery	1.57063e-08	0.251109	0.926	0.892	0.000145267	0	go-transcription-dependent-tethering-of-rna-polymerase-ii-gene-dna-at-nuclear-periphery
go-npbaf-complex	2.02529e-08	0.33363	0.983	0.967	0.000187319	0	go-npbaf-complex
go-non-motile-cilium-assembly	3.1679e-08	0.296443	0.994	0.97	0.000292999	0	go-non-motile-cilium-assembly
go-chromatin-assembly-or-disassembly	3.25927e-08	0.357132	1	0.977	0.00030145	0	go-chromatin-assembly-or-disassembly
go-negative-regulation-of-dna-metabolic-process	3.31678e-08	0.263183	1	0.998	0.000306769	0	go-negative-regulation-of-dna-metabolic-process
go-regulation-of-cell-size	3.71315e-08	0.252199	1	1	0.000343429	0	go-regulation-of-cell-size
go-viral-gene-expression	4.01408e-08	0.26032	1	1	0.000371262	0	go-viral-gene-expression
go-pigment-granule-localization	6.18731e-08	0.271521	0.972	0.985	0.000572264	0	go-pigment-granule-localization
go-histone-h3-k9-modification	6.71673e-08	0.264117	1	0.985	0.00062123	0	go-histone-h3-k9-modification
go-nucleolar-large-rrna-transcription-by-rna-polymerase-i	7.45376e-08	0.2776	0.989	0.992	0.000689398	0	go-nucleolar-large-rrna-transcription-by-rna-polymerase-i
go-g0-to-g1-transition	1.13128e-07	0.3049	1	0.993	0.00104632	0	go-g0-to-g1-transition
go-pre-mrna-intronic-binding	1.51123e-07	0.250088	0.989	0.993	0.00139773	0	go-pre-mrna-intronic-binding
go-esc-e-z-complex	1.78309e-07	0.270694	1	0.993	0.00164918	0	go-esc-e-z-complex
go-microtubule-associated-complex	5.22483e-07	0.26927	1	0.998	0.00483244	0	go-microtubule-associated-complex
go-chromatin-organization-involved-in-regulation-of-transcription	7.55757e-07	0.33623	1	0.997	0.00699	0	go-chromatin-organization-involved-in-regulation-of-transcription
go-error-prone-translesion-synthesis	1.51407e-06	0.251463	1	0.997	0.0140036	0	go-error-prone-translesion-synthesis
go-small-nucleolar-ribonucleoprotein-complex	2.19981e-06	0.307311	1	0.99	0.0203461	0	go-small-nucleolar-ribonucleoprotein-complex
go-dna-replication-independent-nucleosome-organization	1.12315e-05	0.298442	1	0.988	0.10388	0	go-dna-replication-independent-nucleosome-organization
go-peptidyl-lysine-oxidation	2.11586e-85	0.255138	0.946	0.092	1.95696e-81	1	go-peptidyl-lysine-oxidation
go-protein-lysine-6-oxidase-activity	2.11586e-85	0.255138	0.946	0.092	1.95696e-81	1	go-protein-lysine-6-oxidase-activity
go-extracellular-matrix-structural-constituent	3.20513e-64	0.609511	0.978	0.145	2.96443e-60	1	go-extracellular-matrix-structural-constituent
go-collagen-fibril-organization	1.11258e-55	1.39607	0.989	0.277	1.02902e-51	1	go-collagen-fibril-organization
go-connective-tissue-development	1.32397e-54	0.624111	1	0.193	1.22454e-50	1	go-connective-tissue-development
go-skeletal-system-development	8.31898e-52	1.2386	0.989	0.263	7.69422e-48	1	go-skeletal-system-development
go-response-to-cortisol	1.46205e-51	0.274609	0.859	0.199	1.35225e-47	1	go-response-to-cortisol
go-dichotomous-subdivision-of-terminal-units-involved-in-salivary-gland-branching	4.25008e-50	0.391155	0.815	0.172	3.9309e-46	1	go-dichotomous-subdivision-of-terminal-units-involved-in-salivary-gland-branching
go-skeletal-system-morphogenesis	1.60786e-49	0.402093	0.978	0.197	1.48711e-45	1	go-skeletal-system-morphogenesis
go-extracellular-matrix-component	1.20394e-45	1.35315	0.978	0.393	1.11352e-41	1	go-extracellular-matrix-component
go-ossification	1.01543e-44	1.53469	1	0.647	9.39167e-41	1	go-ossification
go-osteoblast-differentiation	5.5159e-44	1.46224	1	0.981	5.10165e-40	1	go-osteoblast-differentiation
go-platelet-derived-growth-factor-binding	2.14744e-42	1.39318	1	0.648	1.98617e-38	1	go-platelet-derived-growth-factor-binding
go-collagen-binding	8.98272e-41	1.27878	1	0.472	8.30812e-37	1	go-collagen-binding
go-cell-substrate-adhesion	1.24274e-40	1.22229	1	0.978	1.14941e-36	1	go-cell-substrate-adhesion
go-integrin-binding	4.1591e-40	1.26493	1	0.562	3.84675e-36	1	go-integrin-binding
go-collagen-containing-extracellular-matrix	8.3158e-40	0.369625	0.957	0.206	7.69129e-36	1	go-collagen-containing-extracellular-matrix
go-regulation-of-protein-autophosphorylation	1.41729e-39	1.22656	1	0.996	1.31085e-35	1	go-regulation-of-protein-autophosphorylation
go-supramolecular-fiber-organization	5.32974e-39	0.696817	1	1	4.92947e-35	1	go-supramolecular-fiber-organization
go-growth-factor-binding	5.20236e-38	1.27645	1	0.555	4.81166e-34	1	go-growth-factor-binding
go-regulation-of-cardiac-epithelial-to-mesenchymal-transition	6.46368e-38	0.295971	0.989	0.334	5.97826e-34	1	go-regulation-of-cardiac-epithelial-to-mesenchymal-transition
go-transforming-growth-factor-beta-binding	9.7416e-38	0.443173	1	0.347	9.01e-34	1	go-transforming-growth-factor-beta-binding
go-cell-substrate-junction	1.42132e-37	0.725952	1	1	1.31458e-33	1	go-cell-substrate-junction
go-positive-regulation-of-epithelial-to-mesenchymal-transition-involved-in-endocardial-cushion-formation	1.81299e-37	0.345193	0.837	0.254	1.67684e-33	1	go-positive-regulation-of-epithelial-to-mesenchymal-transition-involved-in-endocardial-cushion-formation
go-regulation-of-cell-substrate-adhesion	3.32109e-36	0.990259	1	0.988	3.07168e-32	1	go-regulation-of-cell-substrate-adhesion
go-regulation-of-animal-organ-morphogenesis	5.27279e-36	0.82564	1	1	4.8768e-32	1	go-regulation-of-animal-organ-morphogenesis
go-integrin-mediated-signaling-pathway	7.17562e-36	1.26625	1	0.876	6.63673e-32	1	go-integrin-mediated-signaling-pathway
go-fibroblast-proliferation	7.47556e-36	1.21093	1	0.952	6.91414e-32	1	go-fibroblast-proliferation
go-anchoring-junction	2.53469e-35	0.679932	1	1	2.34434e-31	1	go-anchoring-junction
go-glycoprotein-metabolic-process	4.07596e-35	1.17443	1	0.952	3.76986e-31	1	go-glycoprotein-metabolic-process
go-cell-matrix-adhesion	7.0335e-35	1.14671	1	0.972	6.50528e-31	1	go-cell-matrix-adhesion
go-regulation-of-cellular-response-to-transforming-growth-factor-beta-stimulus	9.03596e-35	1.1741	1	0.927	8.35736e-31	1	go-regulation-of-cellular-response-to-transforming-growth-factor-beta-stimulus
go-regulation-of-cell-matrix-adhesion	1.04212e-34	1.01339	1	0.988	9.63859e-31	1	go-regulation-of-cell-matrix-adhesion
go-cellular-response-to-amino-acid-stimulus	1.91946e-34	0.982061	1	0.997	1.77531e-30	1	go-cellular-response-to-amino-acid-stimulus
go-response-to-transforming-growth-factor-beta	2.19476e-34	0.872159	1	0.996	2.02993e-30	1	go-response-to-transforming-growth-factor-beta
go-extracellular-structure-organization	2.2268e-34	1.17101	0.989	0.445	2.05957e-30	1	go-extracellular-structure-organization
go-regulation-of-epithelial-to-mesenchymal-transition-involved-in-endocardial-cushion-formation	1.67674e-33	0.287599	0.848	0.295	1.55082e-29	1	go-regulation-of-epithelial-to-mesenchymal-transition-involved-in-endocardial-cushion-formation
go-transforming-growth-factor-beta-receptor-signaling-pathway	1.69531e-33	0.84115	1	0.999	1.568e-29	1	go-transforming-growth-factor-beta-receptor-signaling-pathway
go-animal-organ-morphogenesis	2.02389e-33	1.31238	1	0.745	1.8719e-29	1	go-animal-organ-morphogenesis
go-cellular-component-disassembly	1.53936e-32	0.30151	1	1	1.42375e-28	1	go-cellular-component-disassembly
go-chondroitin-sulfate-proteoglycan-metabolic-process	1.90817e-32	0.48623	0.978	0.339	1.76486e-28	1	go-chondroitin-sulfate-proteoglycan-metabolic-process
go-smooth-muscle-tissue-development	2.91933e-32	0.279556	0.989	0.352	2.70008e-28	1	go-smooth-muscle-tissue-development
go-proteoglycan-biosynthetic-process	1.39461e-30	0.335822	0.957	0.331	1.28987e-26	1	go-proteoglycan-biosynthetic-process
go-chondroitin-sulfate-proteoglycan-biosynthetic-process	2.09554e-30	0.465944	0.978	0.364	1.93817e-26	1	go-chondroitin-sulfate-proteoglycan-biosynthetic-process
go-regulation-of-cell-junction-assembly	3.46031e-30	0.683771	1	0.997	3.20044e-26	1	go-regulation-of-cell-junction-assembly
go-endoplasmic-reticulum-lumen	4.35805e-30	0.989362	1	0.962	4.03076e-26	1	go-endoplasmic-reticulum-lumen
go-regulation-of-supramolecular-fiber-organization	5.35923e-30	0.483457	1	1	4.95675e-26	1	go-regulation-of-supramolecular-fiber-organization
go-face-morphogenesis	7.04445e-30	1.16407	1	0.85	6.51541e-26	1	go-face-morphogenesis
go-face-development	8.26821e-30	1.16756	1	0.962	7.64727e-26	1	go-face-development
go-tissue-morphogenesis1	1.13068e-29	0.746109	1	0.999	1.04577e-25	1	go-tissue-morphogenesis
go-regulation-of-branching-involved-in-salivary-gland-morphogenesis	1.64049e-29	0.497222	0.989	0.378	1.51729e-25	1	go-regulation-of-branching-involved-in-salivary-gland-morphogenesis
go-lysosomal-lumen	1.77375e-29	0.941461	1	0.985	1.64055e-25	1	go-lysosomal-lumen
go-roof-of-mouth-development	1.40387e-28	0.484162	0.989	0.365	1.29844e-24	1	go-roof-of-mouth-development
go-regulation-of-adherens-junction-organization	2.34527e-28	0.571073	1	1	2.16914e-24	1	go-regulation-of-adherens-junction-organization
go-fibronectin-binding	5.5312e-28	0.844476	0.989	0.517	5.11581e-24	1	go-fibronectin-binding
go-regulation-of-morphogenesis-of-an-epithelium1	6.12599e-28	0.501339	1	1	5.66593e-24	1	go-regulation-of-morphogenesis-of-an-epithelium
go-regulation-of-cell-differentiation	6.15956e-28	0.873603	1	0.999	5.69698e-24	1	go-regulation-of-cell-differentiation
go-circulatory-system-development	1.33298e-27	1.00802	1	0.596	1.23287e-23	1	go-circulatory-system-development
go-proteoglycan-metabolic-process	2.16511e-27	0.294427	0.967	0.345	2.00251e-23	1	go-proteoglycan-metabolic-process
go-smad-binding	2.3967e-27	0.591162	1	1	2.21671e-23	1	go-smad-binding
go-response-to-amino-acid	4.57619e-27	0.67071	1	0.999	4.23251e-23	1	go-response-to-amino-acid
go-heart-development	5.85255e-27	0.934937	1	0.971	5.41302e-23	1	go-heart-development
go-cardiovascular-system-development	7.50947e-27	0.57008	0.989	0.406	6.94551e-23	1	go-cardiovascular-system-development
go-negative-regulation-of-cellular-protein-localization	8.16595e-27	0.522382	1	1	7.55269e-23	1	go-negative-regulation-of-cellular-protein-localization
go-regulation-of-cellular-component-biogenesis	8.29804e-27	0.336908	1	1	7.67485e-23	1	go-regulation-of-cellular-component-biogenesis
go-renal-system-vasculature-morphogenesis	9.79125e-27	0.278533	0.978	0.457	9.05593e-23	1	go-renal-system-vasculature-morphogenesis
go-endosomal-part	1.2787e-26	0.455848	1	1	1.18267e-22	1	go-endosomal-part
go-positive-regulation-of-axon-extension	1.68642e-26	0.866085	1	1	1.55977e-22	1	go-positive-regulation-of-axon-extension
go-negative-regulation-of-dna-damage-response-signal-transduction-by-p53-class-mediator	2.10783e-26	1.0597	1	0.996	1.94954e-22	1	go-negative-regulation-of-dna-damage-response-signal-transduction-by-p53-class-mediator
go-regulation-of-actin-filament-organization	3.1359e-26	0.456089	1	1	2.90039e-22	1	go-regulation-of-actin-filament-organization
go-positive-regulation-of-axonogenesis	3.21952e-26	0.934231	1	0.985	2.97773e-22	1	go-positive-regulation-of-axonogenesis
go-chondroitin-sulfate-biosynthetic-process	4.32757e-26	0.445215	0.989	0.387	4.00257e-22	1	go-chondroitin-sulfate-biosynthetic-process
go-response-to-growth-factor	4.83404e-26	0.645601	1	1	4.471e-22	1	go-response-to-growth-factor
go-regulation-of-hemopoiesis	7.4396e-26	0.603732	1	1	6.88089e-22	1	go-regulation-of-hemopoiesis
go-fibroblast-migration	1.33322e-25	1.04851	1	0.958	1.2331e-21	1	go-fibroblast-migration
go-endoderm-formation	1.49806e-25	0.973106	1	0.969	1.38556e-21	1	go-endoderm-formation
go-response-to-oxidative-stress	1.81858e-25	0.444105	1	1	1.68201e-21	1	go-response-to-oxidative-stress
go-body-morphogenesis	1.94581e-25	0.87576	1	0.99	1.79968e-21	1	go-body-morphogenesis
go-regulation-of-dna-damage-response-signal-transduction-by-p53-class-mediator	3.23603e-25	1.00696	1	0.985	2.99301e-21	1	go-regulation-of-dna-damage-response-signal-transduction-by-p53-class-mediator
go-protein-depolymerization	5.92268e-25	0.671843	1	0.999	5.47789e-21	1	go-protein-depolymerization
go-negative-regulation-of-response-to-stimulus	1.2215e-24	0.611717	1	1	1.12977e-20	1	go-negative-regulation-of-response-to-stimulus
go-gdp-binding	2.71945e-24	0.397096	1	1	2.51522e-20	1	go-gdp-binding
go-positive-regulation-of-adherens-junction-organization	2.87566e-24	0.625214	1	1	2.6597e-20	1	go-positive-regulation-of-adherens-junction-organization
go-head-morphogenesis	3.52349e-24	1.03527	1	0.949	3.25888e-20	1	go-head-morphogenesis
go-actin-filament-depolymerization	4.72359e-24	0.87196	1	0.999	4.36885e-20	1	go-actin-filament-depolymerization
go-regulation-of-anatomical-structure-morphogenesis	5.80588e-24	0.866998	1	0.974	5.36986e-20	1	go-regulation-of-anatomical-structure-morphogenesis
go-oxidoreductase-activity-acting-on-a-sulfur-group-of-donors	6.3613e-24	0.416778	1	1	5.88356e-20	1	go-oxidoreductase-activity-acting-on-a-sulfur-group-of-donors
go-response-to-antibiotic	9.0913e-24	0.733195	1	1	8.40854e-20	1	go-response-to-antibiotic
go-regulation-of-protein-depolymerization	1.45588e-23	0.738949	1	0.999	1.34655e-19	1	go-regulation-of-protein-depolymerization
go-positive-regulation-of-focal-adhesion-assembly	1.49272e-23	0.769978	1	0.999	1.38062e-19	1	go-positive-regulation-of-focal-adhesion-assembly
go-negative-regulation-of-signaling	1.77773e-23	0.607879	1	1	1.64422e-19	1	go-negative-regulation-of-signaling
go-antigen-processing-and-presentation-of-peptide-antigen-via-mhc-class-i	1.84089e-23	0.377554	1	1	1.70264e-19	1	go-antigen-processing-and-presentation-of-peptide-antigen-via-mhc-class-i
go-bleb-assembly	2.25459e-23	0.877651	1	0.717	2.08527e-19	1	go-bleb-assembly
go-negative-regulation-of-protein-localization-to-cell-periphery	3.87853e-23	0.868479	1	0.988	3.58725e-19	1	go-negative-regulation-of-protein-localization-to-cell-periphery
go-structural-molecule-activity	4.84899e-23	1.06815	1	0.86	4.48483e-19	1	go-structural-molecule-activity
go-muscle-cell-migration	5.41345e-23	0.317617	0.989	0.377	5.0069e-19	1	go-muscle-cell-migration
go-cellular-response-to-oxidative-stress	9.0554e-23	0.454812	1	1	8.37534e-19	1	go-cellular-response-to-oxidative-stress
go-positive-regulation-of-protein-autophosphorylation	1.6371e-22	1.02665	1	0.994	1.51415e-18	1	go-positive-regulation-of-protein-autophosphorylation
go-golgi-apparatus-part	2.15069e-22	0.431377	1	1	1.98917e-18	1	go-golgi-apparatus-part
go-hematopoietic-stem-cell-differentiation	2.80957e-22	0.292406	1	1	2.59857e-18	1	go-hematopoietic-stem-cell-differentiation
go-sulfur-compound-biosynthetic-process	3.68536e-22	0.669318	1	0.993	3.40859e-18	1	go-sulfur-compound-biosynthetic-process
go-proteasomal-ubiquitin-independent-protein-catabolic-process	4.99651e-22	0.354394	1	1	4.62128e-18	1	go-proteasomal-ubiquitin-independent-protein-catabolic-process
go-cell-morphogenesis-involved-in-differentiation	5.26867e-22	0.61862	1	0.994	4.87299e-18	1	go-cell-morphogenesis-involved-in-differentiation
go-neurogenesis	5.77371e-22	0.754842	1	0.991	5.3401e-18	1	go-neurogenesis
go-cellular-hypotonic-response	6.70727e-22	0.319131	0.946	0.521	6.20356e-18	1	go-cellular-hypotonic-response
go-muscle-structure-development	8.36243e-22	0.843406	1	0.542	7.73441e-18	1	go-muscle-structure-development
go-response-to-oxygen-levels	9.79285e-22	0.425524	1	1	9.0574e-18	1	go-response-to-oxygen-levels
go-transmembrane-receptor-protein-serine-threonine-kinase-signaling-pathway	1.37723e-21	0.923214	1	0.953	1.2738e-17	1	go-transmembrane-receptor-protein-serine-threonine-kinase-signaling-pathway
go-bone-development	1.38796e-21	0.818312	0.989	0.597	1.28372e-17	1	go-bone-development
go-positive-regulation-of-cell-junction-assembly	1.81285e-21	0.782232	1	0.994	1.6767e-17	1	go-positive-regulation-of-cell-junction-assembly
go-regulation-of-protein-complex-disassembly	1.90118e-21	0.433039	1	1	1.7584e-17	1	go-regulation-of-protein-complex-disassembly
go-cellular-component-morphogenesis	2.41082e-21	0.50282	1	1	2.22977e-17	1	go-cellular-component-morphogenesis
go-regulation-of-hematopoietic-progenitor-cell-differentiation	2.56412e-21	0.273214	1	1	2.37155e-17	1	go-regulation-of-hematopoietic-progenitor-cell-differentiation
go-response-to-hydrogen-peroxide	3.37422e-21	0.707261	1	0.997	3.12082e-17	1	go-response-to-hydrogen-peroxide
go-proteasome-core-complex-beta-subunit-complex	3.98066e-21	0.5099	1	1	3.68171e-17	1	go-proteasome-core-complex-beta-subunit-complex
go-regulation-of-stem-cell-differentiation	4.87491e-21	0.308684	1	1	4.5088e-17	1	go-regulation-of-stem-cell-differentiation
go-enzyme-linked-receptor-protein-signaling-pathway	6.08055e-21	0.518437	1	1	5.6239e-17	1	go-enzyme-linked-receptor-protein-signaling-pathway
go-regulation-of-cytoskeleton-organization	7.13227e-21	0.310592	1	1	6.59664e-17	1	go-regulation-of-cytoskeleton-organization
go-positive-regulation-of-cell-substrate-adhesion	7.43864e-21	0.712322	1	0.984	6.88e-17	1	go-positive-regulation-of-cell-substrate-adhesion
go-regulation-of-cellular-response-to-hypoxia	1.02801e-20	0.988989	1	0.949	9.50807e-17	1	go-regulation-of-cellular-response-to-hypoxia
go-regulation-of-actin-filament-based-process	1.08147e-20	0.402356	1	1	1.00025e-16	1	go-regulation-of-actin-filament-based-process
go-cranial-skeletal-system-development	1.38537e-20	0.551489	0.989	0.597	1.28133e-16	1	go-cranial-skeletal-system-development
go-barbed-end-actin-filament-capping	1.49839e-20	0.576462	1	0.999	1.38586e-16	1	go-barbed-end-actin-filament-capping
go-positive-regulation-of-cell-death	1.7305e-20	0.47753	1	1	1.60054e-16	1	go-positive-regulation-of-cell-death
go-post-translational-protein-modification	1.87253e-20	0.31439	1	1	1.7319e-16	1	go-post-translational-protein-modification
go-negative-regulation-of-cellular-response-to-transforming-growth-factor-beta-stimulus	1.87735e-20	0.753678	1	0.708	1.73637e-16	1	go-negative-regulation-of-cellular-response-to-transforming-growth-factor-beta-stimulus
go-positive-regulation-of-locomotion	1.97032e-20	0.855758	1	0.818	1.82235e-16	1	go-positive-regulation-of-locomotion
go-glycoprotein-biosynthetic-process	1.97926e-20	0.749711	1	0.981	1.83062e-16	1	go-glycoprotein-biosynthetic-process
go-regulation-of-extrinsic-apoptotic-signaling-pathway	2.15183e-20	0.66426	1	0.999	1.99023e-16	1	go-regulation-of-extrinsic-apoptotic-signaling-pathway
go-cellular-response-to-oxygen-containing-compound	2.76219e-20	0.550062	1	1	2.55475e-16	1	go-cellular-response-to-oxygen-containing-compound
go-carbohydrate-derivative-biosynthetic-process	2.90607e-20	0.45131	1	0.999	2.68783e-16	1	go-carbohydrate-derivative-biosynthetic-process
go-antigen-processing-and-presentation	3.11429e-20	0.304487	1	1	2.8804e-16	1	go-antigen-processing-and-presentation
go-morphogenesis-of-an-epithelium1	3.81395e-20	0.459882	1	1	3.52752e-16	1	go-morphogenesis-of-an-epithelium
go-cell-growth	4.10516e-20	0.397602	1	1	3.79686e-16	1	go-cell-growth
go-actin-filament-organization	4.95556e-20	0.382568	1	1	4.5834e-16	1	go-actin-filament-organization
go-cell-substrate-junction-assembly	5.23588e-20	0.468942	1	0.997	4.84267e-16	1	go-cell-substrate-junction-assembly
go-regulation-of-cellular-response-to-growth-factor-stimulus	8.21201e-20	0.658689	1	0.588	7.59529e-16	1	go-regulation-of-cellular-response-to-growth-factor-stimulus
go-positive-regulation-of-epithelial-cell-migration	1.08068e-19	0.812076	1	0.891	9.99521e-16	1	go-positive-regulation-of-epithelial-cell-migration
go-proteoglycan-binding	1.20661e-19	0.459395	1	0.426	1.116e-15	1	go-proteoglycan-binding
go-organelle-membrane-fusion	1.23978e-19	0.674757	1	0.987	1.14668e-15	1	go-organelle-membrane-fusion
go-cellular-response-to-oxygen-levels	1.59802e-19	0.331282	1	1	1.47801e-15	1	go-cellular-response-to-oxygen-levels
go-negative-regulation-of-intracellular-transport	1.87194e-19	0.641907	1	0.996	1.73136e-15	1	go-negative-regulation-of-intracellular-transport
go-cell-adhesion-molecule-binding	1.88042e-19	0.320759	1	1	1.7392e-15	1	go-cell-adhesion-molecule-binding
go-response-to-virus	2.49808e-19	0.689522	1	0.999	2.31047e-15	1	go-response-to-virus
go-regulation-of-cellular-amino-acid-metabolic-process	2.49808e-19	0.255782	1	1	2.31047e-15	1	go-regulation-of-cellular-amino-acid-metabolic-process
go-antigen-processing-and-presentation-of-exogenous-peptide-antigen-via-mhc-class-i	2.52067e-19	0.304869	1	1	2.33137e-15	1	go-antigen-processing-and-presentation-of-exogenous-peptide-antigen-via-mhc-class-i
go-cell-death-in-response-to-oxidative-stress	2.62483e-19	0.598199	1	1	2.42771e-15	1	go-cell-death-in-response-to-oxidative-stress
go-copi-vesicle-coat	2.74556e-19	0.339167	1	0.999	2.53937e-15	1	go-copi-vesicle-coat
go-embryonic-cranial-skeleton-morphogenesis	3.62444e-19	0.757445	0.989	0.692	3.35225e-15	1	go-embryonic-cranial-skeleton-morphogenesis
go-cellular-response-to-abiotic-stimulus	7.50362e-19	0.437292	1	1	6.9401e-15	1	go-cellular-response-to-abiotic-stimulus
go-cellular-response-to-acid-chemical	7.89925e-19	0.861721	1	0.893	7.30601e-15	1	go-cellular-response-to-acid-chemical
go-maintenance-of-protein-localization-in-organelle	8.72549e-19	0.369968	1	1	8.0702e-15	1	go-maintenance-of-protein-localization-in-organelle
go-regulation-of-wnt-signaling-pathway	1.08873e-18	0.324242	1	1	1.00697e-14	1	go-regulation-of-wnt-signaling-pathway
go-cellular-protein-complex-disassembly	1.90507e-18	0.263651	1	1	1.762e-14	1	go-cellular-protein-complex-disassembly
go-histone-acetyltransferase-binding	2.3407e-18	0.77707	1	0.982	2.16491e-14	1	go-histone-acetyltransferase-binding
go-negative-regulation-of-protein-localization-to-membrane	2.87443e-18	0.798671	1	0.978	2.65856e-14	1	go-negative-regulation-of-protein-localization-to-membrane
go-tube-development	2.87503e-18	0.351777	0.989	0.509	2.65912e-14	1	go-tube-development
go-negative-regulation-of-intracellular-signal-transduction	3.00355e-18	0.382898	1	1	2.77798e-14	1	go-negative-regulation-of-intracellular-signal-transduction
go-copi-coated-vesicle	3.13752e-18	0.286273	1	1	2.90189e-14	1	go-copi-coated-vesicle
go-golgi-membrane	4.40607e-18	0.342919	1	1	4.07518e-14	1	go-golgi-membrane
go-negative-regulation-of-protein-tyrosine-kinase-activity	5.42594e-18	0.758191	1	0.991	5.01845e-14	1	go-negative-regulation-of-protein-tyrosine-kinase-activity
go-vacuolar-part	7.56907e-18	0.35348	1	1	7.00063e-14	1	go-vacuolar-part
go-membrane-fusion	9.50982e-18	0.648872	1	0.99	8.79563e-14	1	go-membrane-fusion
go-cellular-response-to-endogenous-stimulus	1.01e-17	0.420194	1	1	9.34151e-14	1	go-cellular-response-to-endogenous-stimulus
go-positive-regulation-of-fibroblast-proliferation	1.03143e-17	0.702458	1	0.723	9.53974e-14	1	go-positive-regulation-of-fibroblast-proliferation
go-response-to-oxygen-containing-compound	1.1992e-17	0.558082	1	1	1.10914e-13	1	go-response-to-oxygen-containing-compound
go-regulation-of-cell-death	1.24637e-17	0.389164	1	1	1.15277e-13	1	go-regulation-of-cell-death
go-cellular-response-to-ionizing-radiation	1.32909e-17	0.409114	1	1	1.22927e-13	1	go-cellular-response-to-ionizing-radiation
go-response-to-endogenous-stimulus	1.69582e-17	0.422139	1	1	1.56847e-13	1	go-response-to-endogenous-stimulus
go-positive-regulation-of-i-kappab-kinase-nf-kappab-signaling	2.2274e-17	0.466371	1	1	2.06012e-13	1	go-positive-regulation-of-i-kappab-kinase-nf-kappab-signaling
go-oxidoreductase-activity-acting-on-nad-p-h-quinone-or-similar-compound-as-acceptor	2.33404e-17	0.292358	1	1	2.15875e-13	1	go-oxidoreductase-activity-acting-on-nad-p-h-quinone-or-similar-compound-as-acceptor
go-positive-regulation-of-cell-morphogenesis-involved-in-differentiation	2.43534e-17	0.3918	1	1	2.25245e-13	1	go-positive-regulation-of-cell-morphogenesis-involved-in-differentiation
go-positive-regulation-of-cell-differentiation	2.91551e-17	0.807942	1	0.874	2.69656e-13	1	go-positive-regulation-of-cell-differentiation
go-positive-regulation-of-cellular-component-biogenesis	3.18104e-17	0.297792	1	1	2.94214e-13	1	go-positive-regulation-of-cellular-component-biogenesis
go-response-to-nitrogen-compound	3.43272e-17	0.429092	1	1	3.17492e-13	1	go-response-to-nitrogen-compound
go-organelle-subcompartment	3.56582e-17	0.337838	1	1	3.29803e-13	1	go-organelle-subcompartment
go-dynactin-complex	3.81002e-17	0.597741	1	0.962	3.52389e-13	1	go-dynactin-complex
go-i-kappab-kinase-nf-kappab-signaling	4.08164e-17	0.422894	1	1	3.77511e-13	1	go-i-kappab-kinase-nf-kappab-signaling
go-axon-extension	4.55438e-17	0.568448	1	0.999	4.21235e-13	1	go-axon-extension
go-post-embryonic-eye-morphogenesis	5.47238e-17	0.35128	0.957	0.635	5.06141e-13	1	go-post-embryonic-eye-morphogenesis
go-negative-regulation-of-apoptotic-signaling-pathway	5.86127e-17	0.284425	1	1	5.42109e-13	1	go-negative-regulation-of-apoptotic-signaling-pathway
go-cellular-response-to-nitrogen-compound	6.13815e-17	0.400385	1	1	5.67717e-13	1	go-cellular-response-to-nitrogen-compound
go-response-to-acid-chemical	7.13707e-17	0.705957	1	0.985	6.60107e-13	1	go-response-to-acid-chemical
go-vacuole	7.53662e-17	0.343433	1	1	6.97062e-13	1	go-vacuole
go-vesicle-organization	8.05803e-17	0.254193	1	1	7.45287e-13	1	go-vesicle-organization
go-negative-regulation-of-wnt-signaling-pathway	8.36679e-17	0.320933	1	1	7.73845e-13	1	go-negative-regulation-of-wnt-signaling-pathway
go-negative-regulation-of-phosphorus-metabolic-process	9.01973e-17	0.354135	1	1	8.34235e-13	1	go-negative-regulation-of-phosphorus-metabolic-process
go-aminoacyl-trna-synthetase-multienzyme-complex	9.80425e-17	0.268409	1	1	9.06795e-13	1	go-aminoacyl-trna-synthetase-multienzyme-complex
go-ras-protein-signal-transduction	1.00107e-16	0.350619	1	1	9.25887e-13	1	go-ras-protein-signal-transduction
go-golgi-apparatus	1.12952e-16	0.339486	1	1	1.04469e-12	1	go-golgi-apparatus
go-regulation-of-cellular-component-size	1.35605e-16	0.333646	1	1	1.25421e-12	1	go-regulation-of-cellular-component-size
go-vacuolar-transport	1.42524e-16	0.324461	1	1	1.31821e-12	1	go-vacuolar-transport
go-protease-binding	1.48556e-16	0.478172	1	0.999	1.37399e-12	1	go-protease-binding
go-proteasome-core-complex	1.48556e-16	0.273299	1	1	1.37399e-12	1	go-proteasome-core-complex
go-central-nervous-system-development1	1.93568e-16	0.643994	1	0.99	1.79031e-12	1	go-central-nervous-system-development
go-ameboidal-type-cell-migration	2.23627e-16	0.711295	1	0.788	2.06832e-12	1	go-ameboidal-type-cell-migration
go-regulation-of-protein-polymerization	2.57215e-16	0.320497	1	1	2.37898e-12	1	go-regulation-of-protein-polymerization
go-epithelial-to-mesenchymal-transition	2.64459e-16	0.8359	1	0.965	2.44598e-12	1	go-epithelial-to-mesenchymal-transition
go-regulation-of-protein-binding	3.06887e-16	0.39795	1	1	2.8384e-12	1	go-regulation-of-protein-binding
go-regulation-of-cellular-component-movement	3.18364e-16	0.661552	1	0.702	2.94455e-12	1	go-regulation-of-cellular-component-movement
go-transmembrane-receptor-protein-tyrosine-kinase-signaling-pathway	3.37222e-16	0.378105	1	1	3.11896e-12	1	go-transmembrane-receptor-protein-tyrosine-kinase-signaling-pathway
go-positive-regulation-of-supramolecular-fiber-organization	3.70507e-16	0.335267	1	1	3.42682e-12	1	go-positive-regulation-of-supramolecular-fiber-organization
go-adherens-junction-assembly	4.39852e-16	0.399034	1	1	4.06819e-12	1	go-adherens-junction-assembly
go-response-to-fibroblast-growth-factor1	4.60034e-16	0.449881	1	1	4.25485e-12	1	go-response-to-fibroblast-growth-factor
go-actin-binding	4.77223e-16	0.365661	1	1	4.41384e-12	1	go-actin-binding
go-positive-regulation-of-protein-dephosphorylation	4.81128e-16	0.628407	1	1	4.44996e-12	1	go-positive-regulation-of-protein-dephosphorylation
go-artery-development	5.09999e-16	0.252686	1	0.509	4.71698e-12	1	go-artery-development
go-regulation-of-cell-development	5.50298e-16	0.648784	1	0.996	5.0897e-12	1	go-regulation-of-cell-development
go-actin-polymerization-or-depolymerization	5.52541e-16	0.327791	1	1	5.11045e-12	1	go-actin-polymerization-or-depolymerization
go-regulation-of-cell-morphogenesis-involved-in-differentiation	6.5265e-16	0.462688	1	1	6.03636e-12	1	go-regulation-of-cell-morphogenesis-involved-in-differentiation
go-vacuolar-lumen	6.74172e-16	0.37673	1	1	6.23542e-12	1	go-vacuolar-lumen
go-neuron-death-in-response-to-oxidative-stress	6.96382e-16	0.750368	1	0.991	6.44084e-12	1	go-neuron-death-in-response-to-oxidative-stress
go-negative-regulation-of-cell-death	7.64374e-16	0.32526	1	1	7.0697e-12	1	go-negative-regulation-of-cell-death
go-regulation-of-viral-life-cycle	8.28775e-16	0.347116	1	1	7.66534e-12	1	go-regulation-of-viral-life-cycle
go-regulation-of-integrin-mediated-signaling-pathway	8.38074e-16	0.87427	1	0.965	7.75135e-12	1	go-regulation-of-integrin-mediated-signaling-pathway
go-endosome-transport-via-multivesicular-body-sorting-pathway	8.52555e-16	0.319204	1	0.999	7.88528e-12	1	go-endosome-transport-via-multivesicular-body-sorting-pathway
go-endoplasmic-reticulum	9.05799e-16	0.386095	1	1	8.37773e-12	1	go-endoplasmic-reticulum
go-oxidoreductase-activity-acting-on-nad-p-h	9.39304e-16	0.279401	1	1	8.68762e-12	1	go-oxidoreductase-activity-acting-on-nad-p-h
go-endosome-to-lysosome-transport-via-multivesicular-body-sorting-pathway	9.88186e-16	0.686421	1	0.958	9.13973e-12	1	go-endosome-to-lysosome-transport-via-multivesicular-body-sorting-pathway
go-endoderm-development	1.00592e-15	0.757971	1	0.988	9.30376e-12	1	go-endoderm-development
go-substrate-adhesion-dependent-cell-spreading	1.1036e-15	0.347297	1	1	1.02072e-11	1	go-substrate-adhesion-dependent-cell-spreading
go-positive-regulation-of-pinocytosis	1.13186e-15	0.718242	1	0.921	1.04686e-11	1	go-positive-regulation-of-pinocytosis
go-protein-repair	1.16903e-15	0.541948	1	0.759	1.08124e-11	1	go-protein-repair
go-gtpase-activity	1.30658e-15	0.286809	1	1	1.20846e-11	1	go-gtpase-activity
go-response-to-cytokine	1.49149e-15	0.490318	1	1	1.37948e-11	1	go-response-to-cytokine
go-positive-regulation-of-signaling	1.70894e-15	0.39407	1	1	1.5806e-11	1	go-positive-regulation-of-signaling
go-negative-regulation-of-phosphorylation	1.85113e-15	0.36432	1	1	1.71211e-11	1	go-negative-regulation-of-phosphorylation
go-response-to-inorganic-substance	1.87344e-15	0.409088	1	1	1.73275e-11	1	go-response-to-inorganic-substance
go-tissue-migration	1.88189e-15	0.541121	1	0.62	1.74056e-11	1	go-tissue-migration
go-regulation-of-oxidative-stress-induced-cell-death	1.91122e-15	0.666229	1	0.999	1.76769e-11	1	go-regulation-of-oxidative-stress-induced-cell-death
go-positive-regulation-of-endothelial-cell-migration	1.92117e-15	0.474499	1	0.569	1.77689e-11	1	go-positive-regulation-of-endothelial-cell-migration
go-maintenance-of-protein-location	1.93424e-15	0.286824	1	1	1.78898e-11	1	go-maintenance-of-protein-location
go-lysosomal-transport	1.95754e-15	0.352549	1	1	1.81053e-11	1	go-lysosomal-transport
go-cell-junction	1.98111e-15	0.36555	1	1	1.83233e-11	1	go-cell-junction
go-negative-regulation-of-viral-process	2.07479e-15	0.707043	1	0.958	1.91897e-11	1	go-negative-regulation-of-viral-process
go-cellular-response-to-gamma-radiation	2.07823e-15	0.447901	1	1	1.92216e-11	1	go-cellular-response-to-gamma-radiation
go-positive-regulation-of-neuron-death	2.25956e-15	0.623485	1	0.99	2.08986e-11	1	go-positive-regulation-of-neuron-death
go-formation-of-primary-germ-layer	2.45488e-15	0.751524	1	0.863	2.27052e-11	1	go-formation-of-primary-germ-layer
go-positive-regulation-of-cell-matrix-adhesion	2.81174e-15	0.664928	1	0.99	2.60058e-11	1	go-positive-regulation-of-cell-matrix-adhesion
go-copi-coated-vesicle-membrane	2.99605e-15	0.264734	1	1	2.77104e-11	1	go-copi-coated-vesicle-membrane
go-tfiid-class-transcription-factor-complex-binding	3.19205e-15	0.516826	1	0.988	2.95233e-11	1	go-tfiid-class-transcription-factor-complex-binding
go-regulation-of-cell-projection-organization	3.256e-15	0.354445	1	1	3.01147e-11	1	go-regulation-of-cell-projection-organization
go-regulation-of-reactive-oxygen-species-metabolic-process	3.26889e-15	0.620992	1	0.993	3.0234e-11	1	go-regulation-of-reactive-oxygen-species-metabolic-process
go-organelle-fusion	3.59454e-15	0.453442	1	0.999	3.32459e-11	1	go-organelle-fusion
go-immune-system-development	3.89012e-15	0.375504	1	1	3.59797e-11	1	go-immune-system-development
go-regulation-of-myeloid-cell-differentiation	4.13062e-15	0.712564	1	0.898	3.82041e-11	1	go-regulation-of-myeloid-cell-differentiation
go-defense-response-to-virus	7.25621e-15	0.657822	1	0.924	6.71127e-11	1	go-defense-response-to-virus
go-regulation-of-protein-localization-to-membrane	8.29844e-15	0.30818	1	1	7.67523e-11	1	go-regulation-of-protein-localization-to-membrane
go-nucleotide-sugar-biosynthetic-process	8.39596e-15	0.475531	1	0.99	7.76543e-11	1	go-nucleotide-sugar-biosynthetic-process
go-regulation-of-binding	8.46192e-15	0.278495	1	1	7.82643e-11	1	go-regulation-of-binding
go-basement-membrane	9.0739e-15	0.662472	0.989	0.577	8.39245e-11	1	go-basement-membrane
go-protein-transport-along-microtubule	9.73623e-15	0.482934	1	0.994	9.00504e-11	1	go-protein-transport-along-microtubule
go-multivesicular-body-sorting-pathway	1.02813e-14	0.31107	1	1	9.50918e-11	1	go-multivesicular-body-sorting-pathway
go-negative-regulation-of-cell-substrate-adhesion	1.2485e-14	0.80148	1	0.835	1.15473e-10	1	go-negative-regulation-of-cell-substrate-adhesion
go-whole-membrane	1.36479e-14	0.293568	1	1	1.26229e-10	1	go-whole-membrane
go-regulation-of-neuron-differentiation	1.74092e-14	0.608033	1	0.994	1.61018e-10	1	go-regulation-of-neuron-differentiation
go-aorta-development	1.74161e-14	0.434959	1	0.642	1.61082e-10	1	go-aorta-development
go-platelet-aggregation	1.75439e-14	0.736276	1	0.991	1.62263e-10	1	go-platelet-aggregation
go-regulation-of-neuron-projection-development	1.78167e-14	0.452848	1	0.999	1.64787e-10	1	go-regulation-of-neuron-projection-development
go-endoplasmic-reticulum-part	1.84455e-14	0.332059	1	1	1.70603e-10	1	go-endoplasmic-reticulum-part
go-lamellipodium	1.85167e-14	0.260437	1	1	1.71261e-10	1	go-lamellipodium
go-positive-regulation-of-developmental-process	2.42376e-14	0.428539	1	0.59	2.24174e-10	1	go-positive-regulation-of-developmental-process
go-type-i-interferon-production	2.58657e-14	0.387584	1	1	2.39232e-10	1	go-type-i-interferon-production
go-positive-regulation-of-cell-projection-organization	2.94604e-14	0.405326	1	0.999	2.7248e-10	1	go-positive-regulation-of-cell-projection-organization
go-wound-healing	3.13952e-14	0.636895	1	0.879	2.90374e-10	1	go-wound-healing
go-positive-regulation-of-neuron-projection-development	3.16787e-14	0.532295	1	0.997	2.92997e-10	1	go-positive-regulation-of-neuron-projection-development
go-s100-protein-binding	3.66195e-14	0.721985	1	1	3.38694e-10	1	go-s100-protein-binding
go-head-development1	3.73236e-14	0.393979	1	1	3.45206e-10	1	go-head-development
go-positive-regulation-of-cytoskeleton-organization	3.93666e-14	0.300392	1	1	3.64102e-10	1	go-positive-regulation-of-cytoskeleton-organization
go-extrinsic-component-of-membrane	4.08928e-14	0.564974	1	0.997	3.78218e-10	1	go-extrinsic-component-of-membrane
go-carbohydrate-derivative-catabolic-process	5.69538e-14	0.74454	1	0.95	5.26766e-10	1	go-carbohydrate-derivative-catabolic-process
go-negative-regulation-of-protein-modification-process	6.467e-14	0.265249	1	1	5.98132e-10	1	go-negative-regulation-of-protein-modification-process
go-positive-regulation-of-actin-filament-bundle-assembly	7.49091e-14	0.458228	1	0.999	6.92834e-10	1	go-positive-regulation-of-actin-filament-bundle-assembly
go-positive-regulation-of-stress-fiber-assembly	7.51916e-14	0.4742	1	0.999	6.95447e-10	1	go-positive-regulation-of-stress-fiber-assembly
go-response-to-ketone	7.62306e-14	0.675589	1	0.959	7.05057e-10	1	go-response-to-ketone
go-regulation-of-extracellular-matrix-organization	7.75936e-14	0.318893	1	0.639	7.17663e-10	1	go-regulation-of-extracellular-matrix-organization
go-rhythmic-process	8.01571e-14	0.595003	1	0.999	7.41373e-10	1	go-rhythmic-process
go-regulation-of-transmembrane-receptor-protein-serine-threonine-kinase-signaling-pathway	9.94455e-14	0.463939	1	0.616	9.19771e-10	1	go-regulation-of-transmembrane-receptor-protein-serine-threonine-kinase-signaling-pathway
go-myeloid-cell-differentiation	1.06594e-13	0.551028	1	0.996	9.85885e-10	1	go-myeloid-cell-differentiation
go-cellular-response-to-radiation	1.06594e-13	0.320942	1	0.999	9.85887e-10	1	go-cellular-response-to-radiation
go-oligopeptide-binding	1.28422e-13	0.712465	1	0.86	1.18778e-09	1	go-oligopeptide-binding
go-positive-regulation-of-binding	1.38425e-13	0.26574	1	1	1.2803e-09	1	go-positive-regulation-of-binding
go-positive-regulation-of-intracellular-signal-transduction	1.53617e-13	0.573275	1	0.985	1.42081e-09	1	go-positive-regulation-of-intracellular-signal-transduction
go-inactivation-of-mapk-activity	1.87642e-13	0.557408	1	0.823	1.7355e-09	1	go-inactivation-of-mapk-activity
go-negative-regulation-of-intracellular-protein-transport	1.97704e-13	0.562281	1	0.996	1.82857e-09	1	go-negative-regulation-of-intracellular-protein-transport
go-intramolecular-oxidoreductase-activity	2.03645e-13	0.387936	1	0.999	1.88351e-09	1	go-intramolecular-oxidoreductase-activity
go-cytoplasmic-vesicle-part	2.11317e-13	0.322909	1	1	1.95447e-09	1	go-cytoplasmic-vesicle-part
go-response-to-wounding	2.27444e-13	0.60391	1	0.926	2.10363e-09	1	go-response-to-wounding
go-trans-golgi-network	2.2921e-13	0.327186	1	1	2.11996e-09	1	go-trans-golgi-network
go-extrinsic-apoptotic-signaling-pathway	2.40473e-13	0.356103	1	1	2.22414e-09	1	go-extrinsic-apoptotic-signaling-pathway
go-cell-junction-assembly	2.60786e-13	0.309187	1	1	2.41201e-09	1	go-cell-junction-assembly
go-aging	2.61749e-13	0.322976	1	1	2.42091e-09	1	go-aging
go-neuron-differentiation	2.96622e-13	0.549165	1	0.991	2.74346e-09	1	go-neuron-differentiation
go-cell-leading-edge	2.99914e-13	0.264079	1	1	2.7739e-09	1	go-cell-leading-edge
go-neuron-development	3.13427e-13	0.45952	1	0.997	2.89889e-09	1	go-neuron-development
go-oligosaccharyltransferase-complex	3.13428e-13	0.259827	1	1	2.89889e-09	1	go-oligosaccharyltransferase-complex
go-response-to-metal-ion	3.27539e-13	0.523754	1	0.999	3.02941e-09	1	go-response-to-metal-ion
go-contractile-fiber	3.46054e-13	0.658934	1	0.991	3.20065e-09	1	go-contractile-fiber
go-cytokine-mediated-signaling-pathway	3.56529e-13	0.389017	1	0.839	3.29754e-09	1	go-cytokine-mediated-signaling-pathway
go-positive-regulation-of-neuron-differentiation	3.76431e-13	0.672901	1	0.982	3.48161e-09	1	go-positive-regulation-of-neuron-differentiation
go-purine-nucleoside-biosynthetic-process	3.77847e-13	0.545857	1	0.994	3.49471e-09	1	go-purine-nucleoside-biosynthetic-process
go-central-nervous-system-neuron-axonogenesis	3.85747e-13	0.727419	0.989	0.861	3.56778e-09	1	go-central-nervous-system-neuron-axonogenesis
go-response-to-calcium-ion	3.9203e-13	0.649837	1	0.943	3.62588e-09	1	go-response-to-calcium-ion
go-regulation-of-cell-adhesion	3.92487e-13	0.411665	1	0.607	3.63011e-09	1	go-regulation-of-cell-adhesion
go-intrinsic-component-of-golgi-membrane	4.23179e-13	0.489764	1	0.991	3.91398e-09	1	go-intrinsic-component-of-golgi-membrane
go-aldehyde-catabolic-process	4.37286e-13	0.702032	0.989	0.985	4.04446e-09	1	go-aldehyde-catabolic-process
go-response-to-reactive-oxygen-species	4.4537e-13	0.45017	1	0.999	4.11923e-09	1	go-response-to-reactive-oxygen-species
go-viral-genome-replication	4.55225e-13	0.250397	1	1	4.21037e-09	1	go-viral-genome-replication
go-peptidase-activator-activity	4.56888e-13	0.512312	1	1	4.22576e-09	1	go-peptidase-activator-activity
go-cell-morphogenesis-involved-in-neuron-differentiation	4.91294e-13	0.636811	1	0.975	4.54398e-09	1	go-cell-morphogenesis-involved-in-neuron-differentiation
go-regulation-of-phosphorus-metabolic-process	5.07799e-13	0.328512	1	1	4.69664e-09	1	go-regulation-of-phosphorus-metabolic-process
go-regulation-of-cell-morphogenesis	5.95853e-13	0.315324	1	1	5.51105e-09	1	go-regulation-of-cell-morphogenesis
go-muscle-tissue-development	6.25639e-13	0.325554	0.978	0.467	5.78653e-09	1	go-muscle-tissue-development
go-protein-phosphorylation	8.01722e-13	0.276839	1	1	7.41513e-09	1	go-protein-phosphorylation
go-early-endosome-membrane	8.37185e-13	0.610431	1	0.991	7.74312e-09	1	go-early-endosome-membrane
go-amp-biosynthetic-process	1.07275e-12	0.585849	1	0.877	9.9219e-09	1	go-amp-biosynthetic-process
go-fat-cell-differentiation	1.11321e-12	0.595549	1	0.785	1.02961e-08	1	go-fat-cell-differentiation
go-regulation-of-cell-size1	1.22535e-12	0.438112	1	1	1.13333e-08	1	go-regulation-of-cell-size
go-protein-localization-to-cell-surface	1.23835e-12	0.696606	1	0.978	1.14535e-08	1	go-protein-localization-to-cell-surface
go-regulation-of-anatomical-structure-size	1.29293e-12	0.481254	1	0.997	1.19583e-08	1	go-regulation-of-anatomical-structure-size
go-positive-regulation-of-axon-guidance	1.57916e-12	0.427012	0.989	0.658	1.46057e-08	1	go-positive-regulation-of-axon-guidance
go-insulin-like-growth-factor-ii-binding	2.31366e-12	0.295726	0.989	0.634	2.1399e-08	1	go-insulin-like-growth-factor-ii-binding
go-carbohydrate-derivative-metabolic-process	2.49577e-12	0.291518	1	0.997	2.30834e-08	1	go-carbohydrate-derivative-metabolic-process
go-negative-regulation-of-cysteine-type-endopeptidase-activity	2.72602e-12	0.484533	1	1	2.5213e-08	1	go-negative-regulation-of-cysteine-type-endopeptidase-activity
go-regulation-of-protein-modification-process	2.88418e-12	0.25416	1	1	2.66758e-08	1	go-regulation-of-protein-modification-process
go-cell-projection-organization	3.18289e-12	0.30262	1	1	2.94386e-08	1	go-cell-projection-organization
go-response-to-increased-oxygen-levels	3.19394e-12	0.627074	1	0.985	2.95407e-08	1	go-response-to-increased-oxygen-levels
go-negative-regulation-of-protein-complex-assembly	3.47509e-12	0.37234	1	0.999	3.21411e-08	1	go-negative-regulation-of-protein-complex-assembly
go-regulation-of-multi-organism-process	3.78028e-12	0.265388	1	1	3.49638e-08	1	go-regulation-of-multi-organism-process
go-regulation-of-fibroblast-migration	3.87647e-12	0.637584	1	0.888	3.58535e-08	1	go-regulation-of-fibroblast-migration
go-actin-filament-bundle	5.23138e-12	0.333904	1	0.999	4.8385e-08	1	go-actin-filament-bundle
go-negative-regulation-of-actin-filament-depolymerization	5.43556e-12	0.784489	1	0.996	5.02735e-08	1	go-negative-regulation-of-actin-filament-depolymerization
go-vacuolar-membrane	5.58895e-12	0.270341	1	1	5.16922e-08	1	go-vacuolar-membrane
go-phagocytic-vesicle	7.32514e-12	0.330039	1	1	6.77502e-08	1	go-phagocytic-vesicle
go-growth	7.32514e-12	0.277761	1	1	6.77502e-08	1	go-growth
go-response-to-heat	7.95862e-12	0.260837	1	1	7.36092e-08	1	go-response-to-heat
go-branching-involved-in-salivary-gland-morphogenesis	8.92678e-12	0.385398	0.967	0.648	8.25638e-08	1	go-branching-involved-in-salivary-gland-morphogenesis
go-maintenance-of-protein-localization-in-endoplasmic-reticulum	9.16712e-12	0.503686	1	0.993	8.47867e-08	1	go-maintenance-of-protein-localization-in-endoplasmic-reticulum
go-neuron-death	9.3585e-12	0.334588	1	1	8.65568e-08	1	go-neuron-death
go-late-endosome-to-vacuole-transport	1.04468e-11	0.272563	1	0.999	9.66228e-08	1	go-late-endosome-to-vacuole-transport
go-negative-regulation-of-mitochondrion-organization	1.14216e-11	0.417751	1	0.999	1.05638e-07	1	go-negative-regulation-of-mitochondrion-organization
go-signal-transduction-by-protein-phosphorylation	1.30526e-11	0.540089	1	0.988	1.20723e-07	1	go-signal-transduction-by-protein-phosphorylation
go-axo-dendritic-transport	1.33233e-11	0.294708	1	1	1.23227e-07	1	go-axo-dendritic-transport
go-canonical-wnt-signaling-pathway1	1.81031e-11	0.26541	1	1	1.67435e-07	1	go-canonical-wnt-signaling-pathway
go-positive-regulation-of-protein-polymerization	1.89197e-11	0.363444	1	1	1.74988e-07	1	go-positive-regulation-of-protein-polymerization
go-rac-protein-signal-transduction	1.89838e-11	0.477814	1	0.993	1.75582e-07	1	go-rac-protein-signal-transduction
go-membrane-protein-complex	2.20346e-11	0.263383	1	1	2.03798e-07	1	go-membrane-protein-complex
go-rna-polymerase-ii-general-transcription-initiation-factor-binding	2.39765e-11	0.388168	1	0.993	2.21759e-07	1	go-rna-polymerase-ii-general-transcription-initiation-factor-binding
go-positive-regulation-of-transcription-by-rna-polymerase-ii	2.47995e-11	0.404162	1	1	2.2937e-07	1	go-positive-regulation-of-transcription-by-rna-polymerase-ii
go-basal-transcription-machinery-binding	2.51363e-11	0.386163	1	0.997	2.32486e-07	1	go-basal-transcription-machinery-binding
go-gtpase-inhibitor-activity	2.75684e-11	0.645278	1	0.93	2.5498e-07	1	go-gtpase-inhibitor-activity
go-axonal-transport	3.37891e-11	0.339674	1	1	3.12516e-07	1	go-axonal-transport
go-platelet-derived-growth-factor-receptor-signaling-pathway	3.4245e-11	0.413345	1	0.997	3.16732e-07	1	go-platelet-derived-growth-factor-receptor-signaling-pathway
go-cellular-response-to-osmotic-stress	3.45777e-11	0.570489	1	0.971	3.19809e-07	1	go-cellular-response-to-osmotic-stress
go-positive-regulation-of-extrinsic-apoptotic-signaling-pathway	3.47069e-11	0.493901	1	0.996	3.21004e-07	1	go-positive-regulation-of-extrinsic-apoptotic-signaling-pathway
go-3-phosphoadenosine-5-phosphosulfate-biosynthetic-process	3.7985e-11	0.318182	0.913	0.636	3.51323e-07	1	go-3-phosphoadenosine-5-phosphosulfate-biosynthetic-process
go-telencephalon-development1	3.99329e-11	0.643842	1	0.977	3.69339e-07	1	go-telencephalon-development
go-positive-regulation-of-dna-templated-transcription-initiation	4.04776e-11	0.354378	1	1	3.74377e-07	1	go-positive-regulation-of-dna-templated-transcription-initiation
go-negative-regulation-of-actin-filament-polymerization	4.15728e-11	0.534868	1	1	3.84507e-07	1	go-negative-regulation-of-actin-filament-polymerization
go-tubulin-complex-assembly	4.38424e-11	0.579478	1	0.977	4.05499e-07	1	go-tubulin-complex-assembly
go-actomyosin	5.0933e-11	0.298193	1	0.999	4.71079e-07	1	go-actomyosin
go-regulation-of-early-endosome-to-late-endosome-transport	6.03158e-11	0.37496	1	0.993	5.57861e-07	1	go-regulation-of-early-endosome-to-late-endosome-transport
go-negative-regulation-of-erbb-signaling-pathway	6.09179e-11	0.437943	1	0.999	5.6343e-07	1	go-negative-regulation-of-erbb-signaling-pathway
go-response-to-peptide	6.21391e-11	0.268607	1	1	5.74724e-07	1	go-response-to-peptide
go-proline-rich-region-binding	6.46536e-11	0.517668	1	0.997	5.97981e-07	1	go-proline-rich-region-binding
go-negative-regulation-of-supramolecular-fiber-organization	6.77132e-11	0.59835	1	0.999	6.2628e-07	1	go-negative-regulation-of-supramolecular-fiber-organization
go-positive-regulation-of-tau-protein-kinase-activity	7.04085e-11	0.630934	1	0.966	6.51208e-07	1	go-positive-regulation-of-tau-protein-kinase-activity
go-regulation-of-response-to-cytokine-stimulus	7.11662e-11	0.518967	1	0.891	6.58216e-07	1	go-regulation-of-response-to-cytokine-stimulus
go-regulation-of-mesenchymal-cell-proliferation	7.81299e-11	0.309695	0.989	0.604	7.22623e-07	1	go-regulation-of-mesenchymal-cell-proliferation
go-response-to-hormone	9.31629e-11	0.281472	1	1	8.61664e-07	1	go-response-to-hormone
go-lamellipodium-membrane	9.39589e-11	0.447018	1	0.809	8.69026e-07	1	go-lamellipodium-membrane
go-cell-activation	9.5612e-11	0.368646	1	0.974	8.84316e-07	1	go-cell-activation
go-golgi-to-plasma-membrane-protein-transport	9.97962e-11	0.315685	1	1	9.23015e-07	1	go-golgi-to-plasma-membrane-protein-transport
go-regulation-of-protein-localization-to-plasma-membrane	1.18658e-10	0.285402	1	1	1.09747e-06	1	go-regulation-of-protein-localization-to-plasma-membrane
go-clathrin-heavy-chain-binding	1.18918e-10	0.675964	0.967	0.879	1.09988e-06	1	go-clathrin-heavy-chain-binding
go-transport-vesicle	1.24601e-10	0.26309	1	1	1.15244e-06	1	go-transport-vesicle
go-negative-regulation-of-oxidative-stress-induced-neuron-death	1.25416e-10	0.683558	1	0.999	1.15997e-06	1	go-negative-regulation-of-oxidative-stress-induced-neuron-death
go-intraciliary-transport-involved-in-cilium-assembly	1.56918e-10	0.430697	1	0.997	1.45133e-06	1	go-intraciliary-transport-involved-in-cilium-assembly
go-response-to-toxic-substance	1.69427e-10	0.502451	1	0.959	1.56703e-06	1	go-response-to-toxic-substance
go-invadopodium	1.69532e-10	0.624114	1	0.971	1.56801e-06	1	go-invadopodium
go-cellular-response-to-reactive-oxygen-species	1.73474e-10	0.444852	1	0.994	1.60446e-06	1	go-cellular-response-to-reactive-oxygen-species
go-positive-regulation-of-protein-binding	1.74599e-10	0.281751	1	1	1.61487e-06	1	go-positive-regulation-of-protein-binding
go-macromolecule-transmembrane-transporter-activity	1.82675e-10	0.303632	1	1	1.68956e-06	1	go-macromolecule-transmembrane-transporter-activity
go-mesenchyme-development	1.92017e-10	0.297549	0.967	0.603	1.77596e-06	1	go-mesenchyme-development
go-regulation-of-erbb-signaling-pathway	1.93596e-10	0.516528	1	0.993	1.79057e-06	1	go-regulation-of-erbb-signaling-pathway
go-late-endosome-to-vacuole-transport-via-multivesicular-body-sorting-pathway	2.15987e-10	0.286918	1	0.987	1.99767e-06	1	go-late-endosome-to-vacuole-transport-via-multivesicular-body-sorting-pathway
go-phagosome-maturation	2.15994e-10	0.535198	1	0.996	1.99773e-06	1	go-phagosome-maturation
go-positive-regulation-of-early-endosome-to-late-endosome-transport	2.1878e-10	0.514393	1	0.985	2.0235e-06	1	go-positive-regulation-of-early-endosome-to-late-endosome-transport
go-sulfuric-ester-hydrolase-activity	2.25348e-10	0.303153	0.957	0.616	2.08424e-06	1	go-sulfuric-ester-hydrolase-activity
go-positive-regulation-of-epithelial-to-mesenchymal-transition	2.43714e-10	0.451944	1	0.785	2.25411e-06	1	go-positive-regulation-of-epithelial-to-mesenchymal-transition
go-negative-regulation-of-cell-development	2.44155e-10	0.655965	1	0.755	2.25819e-06	1	go-negative-regulation-of-cell-development
go-response-to-nerve-growth-factor	3.01385e-10	0.491589	1	0.996	2.78751e-06	1	go-response-to-nerve-growth-factor
go-negative-regulation-of-viral-entry-into-host-cell	3.14941e-10	0.599811	1	0.882	2.91289e-06	1	go-negative-regulation-of-viral-entry-into-host-cell
go-negative-regulation-of-signal-transduction-by-p53-class-mediator	3.22231e-10	0.652081	1	0.982	2.98032e-06	1	go-negative-regulation-of-signal-transduction-by-p53-class-mediator
go-myeloid-cell-homeostasis	4.08955e-10	0.400069	1	0.999	3.78242e-06	1	go-myeloid-cell-homeostasis
go-pigment-granule-organization	4.42476e-10	0.544427	1	0.971	4.09246e-06	1	go-pigment-granule-organization
go-immune-effector-process	5.02205e-10	0.321278	1	0.999	4.64489e-06	1	go-immune-effector-process
go-regulation-of-protein-localization-to-cell-periphery	5.85919e-10	0.255492	1	1	5.41917e-06	1	go-regulation-of-protein-localization-to-cell-periphery
go-phosphoserine-residue-binding	6.33694e-10	0.499982	1	0.984	5.86104e-06	1	go-phosphoserine-residue-binding
go-axon-cytoplasm	6.70488e-10	0.258243	1	1	6.20134e-06	1	go-axon-cytoplasm
go-cdc73-paf1-complex	6.73567e-10	0.48139	0.989	0.981	6.22982e-06	1	go-cdc73-paf1-complex
go-transcription-factor-tfiih-holo-complex	7.1123e-10	0.403582	1	0.968	6.57817e-06	1	go-transcription-factor-tfiih-holo-complex
go-srp-dependent-cotranslational-protein-targeting-to-membrane-translocation	7.4568e-10	0.292694	1	0.999	6.89679e-06	1	go-srp-dependent-cotranslational-protein-targeting-to-membrane-translocation
go-membrane-raft-assembly	8.22346e-10	0.646833	1	0.947	7.60588e-06	1	go-membrane-raft-assembly
go-membrane-raft-organization	1.13744e-09	0.617157	1	0.977	1.05201e-05	1	go-membrane-raft-organization
go-cell-projection-part	1.1988e-09	0.551819	1	0.98	1.10877e-05	1	go-cell-projection-part
go-au-rich-element-binding	1.49627e-09	0.36888	1	1	1.3839e-05	1	go-au-rich-element-binding
go-positive-regulation-of-endothelial-cell-chemotaxis	1.60235e-09	0.457241	0.989	0.816	1.48202e-05	1	go-positive-regulation-of-endothelial-cell-chemotaxis
go-intraciliary-transport	1.7706e-09	0.419245	1	0.984	1.63763e-05	1	go-intraciliary-transport
go-regulation-of-actin-filament-bundle-assembly	2.19831e-09	0.321385	1	0.999	2.03322e-05	1	go-regulation-of-actin-filament-bundle-assembly
go-platelet-derived-growth-factor-receptor-binding	2.23069e-09	0.251774	1	0.651	2.06316e-05	1	go-platelet-derived-growth-factor-receptor-binding
go-molecular-adaptor-activity	2.4446e-09	0.396249	1	0.999	2.26101e-05	1	go-molecular-adaptor-activity
go-response-to-nutrient	2.45796e-09	0.555504	1	0.964	2.27337e-05	1	go-response-to-nutrient
go-regulation-of-er-associated-ubiquitin-dependent-protein-catabolic-process	3.09405e-09	0.402286	1	0.993	2.86169e-05	1	go-regulation-of-er-associated-ubiquitin-dependent-protein-catabolic-process
go-positive-regulation-of-peptidyl-serine-phosphorylation	3.13694e-09	0.463198	1	0.812	2.90135e-05	1	go-positive-regulation-of-peptidyl-serine-phosphorylation
go-positive-regulation-of-rna-polymerase-ii-transcriptional-preinitiation-complex-assembly	3.34569e-09	0.448231	1	0.987	3.09443e-05	1	go-positive-regulation-of-rna-polymerase-ii-transcriptional-preinitiation-complex-assembly
go-neuron-intrinsic-apoptotic-signaling-pathway-in-response-to-oxidative-stress	3.46856e-09	0.482285	1	0.994	3.20808e-05	1	go-neuron-intrinsic-apoptotic-signaling-pathway-in-response-to-oxidative-stress
go-retrograde-transport-endosome-to-golgi	4.00512e-09	0.262046	1	1	3.70434e-05	1	go-retrograde-transport-endosome-to-golgi
go-corpus-callosum-morphogenesis	5.2655e-09	0.344563	0.978	0.752	4.87006e-05	1	go-corpus-callosum-morphogenesis
go-regulation-of-defense-response-to-virus	5.36308e-09	0.544736	0.989	0.952	4.96032e-05	1	go-regulation-of-defense-response-to-virus
go-protein-deneddylation	5.55723e-09	0.331008	1	0.99	5.13988e-05	1	go-protein-deneddylation
go-response-to-organic-cyclic-compound	5.74142e-09	0.302489	1	1	5.31024e-05	1	go-response-to-organic-cyclic-compound
go-regulation-of-growth	5.94905e-09	0.311779	1	1	5.50228e-05	1	go-regulation-of-growth
go-negative-regulation-of-stem-cell-differentiation	6.36759e-09	0.614329	1	0.993	5.88939e-05	1	go-negative-regulation-of-stem-cell-differentiation
go-nucleotide-excision-repair-preincision-complex-stabilization	6.5778e-09	0.374371	1	0.999	6.08381e-05	1	go-nucleotide-excision-repair-preincision-complex-stabilization
go-cellular-response-to-peptide	7.64373e-09	0.252298	1	1	7.06969e-05	1	go-cellular-response-to-peptide
go-platelet-degranulation	7.82544e-09	0.348653	1	0.991	7.23775e-05	1	go-platelet-degranulation
go-vesicle-membrane	7.8255e-09	0.250868	1	0.999	7.23781e-05	1	go-vesicle-membrane
go-response-to-lipid	7.83183e-09	0.363348	1	0.812	7.24366e-05	1	go-response-to-lipid
go-fibroblast-growth-factor-receptor-signaling-pathway1	9.30215e-09	0.264846	1	1	8.60356e-05	1	go-fibroblast-growth-factor-receptor-signaling-pathway
go-positive-regulation-of-viral-release-from-host-cell	1.07627e-08	0.371413	1	0.997	9.95441e-05	1	go-positive-regulation-of-viral-release-from-host-cell
go-developmental-cell-growth	1.09826e-08	0.5126	1	0.977	0.000101578	1	go-developmental-cell-growth
go-erythrocyte-homeostasis	1.17777e-08	0.312094	1	0.999	0.000108932	1	go-erythrocyte-homeostasis
go-cardiolipin-acyl-chain-remodeling	1.20132e-08	0.2563	0.935	0.718	0.00011111	1	go-cardiolipin-acyl-chain-remodeling
go-unsaturated-fatty-acid-biosynthetic-process	1.24691e-08	0.379505	1	0.839	0.000115327	1	go-unsaturated-fatty-acid-biosynthetic-process
go-trans-golgi-network-transport-vesicle	1.29227e-08	0.490702	1	0.991	0.000119522	1	go-trans-golgi-network-transport-vesicle
go-transferase-activity-transferring-alkyl-or-aryl-other-than-methyl-groups	1.33024e-08	0.36221	1	0.999	0.000123034	1	go-transferase-activity-transferring-alkyl-or-aryl-other-than-methyl-groups
go-negative-regulation-of-protein-polymerization	1.35745e-08	0.405925	1	0.999	0.00012555	1	go-negative-regulation-of-protein-polymerization
go-lamellipodium-organization	1.3812e-08	0.324183	1	0.999	0.000127747	1	go-lamellipodium-organization
go-homeostasis-of-number-of-cells	1.4135e-08	0.411717	1	0.999	0.000130734	1	go-homeostasis-of-number-of-cells
go-negative-regulation-of-neuron-projection-development	1.42526e-08	0.548815	1	0.968	0.000131822	1	go-negative-regulation-of-neuron-projection-development
go-membrane-region	1.4258e-08	0.3194	1	0.999	0.000131872	1	go-membrane-region
go-establishment-of-protein-localization-to-plasma-membrane	1.51049e-08	0.27401	1	1	0.000139706	1	go-establishment-of-protein-localization-to-plasma-membrane
go-positive-regulation-of-mitochondrial-fission	1.51923e-08	0.551545	0.989	0.997	0.000140513	1	go-positive-regulation-of-mitochondrial-fission
go-insulin-like-growth-factor-i-binding	1.66179e-08	0.263422	1	0.753	0.000153699	1	go-insulin-like-growth-factor-i-binding
go-heparan-sulfate-proteoglycan-metabolic-process	1.68846e-08	0.304623	0.924	0.669	0.000156166	1	go-heparan-sulfate-proteoglycan-metabolic-process
go-respiratory-system-development	1.8414e-08	0.431465	0.989	0.762	0.000170311	1	go-respiratory-system-development
go-response-to-tumor-necrosis-factor	1.89543e-08	0.355563	1	0.999	0.000175309	1	go-response-to-tumor-necrosis-factor
go-ciliary-tip	1.90941e-08	0.471061	1	0.952	0.000176601	1	go-ciliary-tip
go-ribosome-disassembly	2.02721e-08	0.479054	0.978	0.93	0.000187496	1	go-ribosome-disassembly
go-phosphatidylinositol-binding	2.0771e-08	0.356358	1	0.993	0.000192111	1	go-phosphatidylinositol-binding
go-regulation-of-cell-communication-by-electrical-coupling	2.18036e-08	0.640872	1	0.99	0.000201662	1	go-regulation-of-cell-communication-by-electrical-coupling
go-small-ribosomal-subunit	2.30827e-08	0.447999	1	0.991	0.000213492	1	go-small-ribosomal-subunit
go-negative-regulation-of-cell-projection-organization	2.51339e-08	0.514236	1	0.974	0.000232463	1	go-negative-regulation-of-cell-projection-organization
go-movement-in-environment-of-other-organism-involved-in-symbiotic-interaction	2.74498e-08	0.267276	1	1	0.000253883	1	go-movement-in-environment-of-other-organism-involved-in-symbiotic-interaction
go-adherens-junction-organization	2.78413e-08	0.295849	1	1	0.000257504	1	go-adherens-junction-organization
go-positive-regulation-of-protein-modification-process	2.83183e-08	0.263371	1	1	0.000261916	1	go-positive-regulation-of-protein-modification-process
go-oligosaccharyl-transferase-activity	3.21574e-08	0.31276	1	0.997	0.000297424	1	go-oligosaccharyl-transferase-activity
go-pallium-development	3.30767e-08	0.376867	1	1	0.000305926	1	go-pallium-development
go-regulation-of-viral-entry-into-host-cell	3.66824e-08	0.381232	1	0.799	0.000339276	1	go-regulation-of-viral-entry-into-host-cell
go-positive-regulation-of-er-associated-ubiquitin-dependent-protein-catabolic-process	3.71184e-08	0.418732	1	0.985	0.000343308	1	go-positive-regulation-of-er-associated-ubiquitin-dependent-protein-catabolic-process
go-extrinsic-apoptotic-signaling-pathway-via-death-domain-receptors	4.10614e-08	0.378534	1	0.999	0.000379777	1	go-extrinsic-apoptotic-signaling-pathway-via-death-domain-receptors
go-regulation-of-synaptic-vesicle-recycling	4.15693e-08	0.487087	0.978	0.889	0.000384474	1	go-regulation-of-synaptic-vesicle-recycling
go-vesicle-cytoskeletal-trafficking	4.31816e-08	0.289018	1	0.997	0.000399387	1	go-vesicle-cytoskeletal-trafficking
go-cellular-response-to-lipid	4.43369e-08	0.39476	1	0.947	0.000410072	1	go-cellular-response-to-lipid
go-protein-disulfide-isomerase-activity	4.73473e-08	0.5968	1	0.991	0.000437915	1	go-protein-disulfide-isomerase-activity
go-golgi-cisterna	4.81458e-08	0.429856	1	0.996	0.0004453	1	go-golgi-cisterna
go-negative-regulation-of-nervous-system-development	5.10947e-08	0.485306	1	0.813	0.000472575	1	go-negative-regulation-of-nervous-system-development
go-cell-aging	5.13282e-08	0.327703	1	0.997	0.000474734	1	go-cell-aging
go-positive-regulation-of-response-to-cytokine-stimulus	5.2745e-08	0.451349	1	0.876	0.000487839	1	go-positive-regulation-of-response-to-cytokine-stimulus
go-contractile-actin-filament-bundle-assembly	5.65654e-08	0.252373	1	0.999	0.000523174	1	go-contractile-actin-filament-bundle-assembly
go-negative-regulation-of-epidermal-growth-factor-activated-receptor-activity	5.78327e-08	0.502413	1	0.99	0.000534895	1	go-negative-regulation-of-epidermal-growth-factor-activated-receptor-activity
go-cellular-response-to-antibiotic	6.24913e-08	0.451015	1	0.996	0.000577982	1	go-cellular-response-to-antibiotic
go-rna-cap-binding	6.75121e-08	0.324425	1	0.997	0.000624419	1	go-rna-cap-binding
go-bloc-complex	6.82597e-08	0.421063	1	0.99	0.000631334	1	go-bloc-complex
go-negative-regulation-of-cell-growth	7.97587e-08	0.264542	1	0.765	0.000737688	1	go-negative-regulation-of-cell-growth
go-positive-regulation-of-microtubule-polymerization-or-depolymerization	8.71255e-08	0.570785	1	0.969	0.000805824	1	go-positive-regulation-of-microtubule-polymerization-or-depolymerization
go-protein-phosphatase-activator-activity	8.90777e-08	0.387778	1	0.999	0.00082388	1	go-protein-phosphatase-activator-activity
go-substrate-dependent-cell-migration	9.15762e-08	0.488669	1	0.861	0.000846988	1	go-substrate-dependent-cell-migration
go-negative-regulation-of-extrinsic-apoptotic-signaling-pathway	9.95636e-08	0.528539	1	0.962	0.000920864	1	go-negative-regulation-of-extrinsic-apoptotic-signaling-pathway
go-cytoplasmic-side-of-membrane	1.12882e-07	0.437165	1	0.997	0.00104405	1	go-cytoplasmic-side-of-membrane
go-regulation-of-rna-polymerase-ii-transcriptional-preinitiation-complex-assembly	1.20465e-07	0.294856	1	0.991	0.00111418	1	go-regulation-of-rna-polymerase-ii-transcriptional-preinitiation-complex-assembly
go-regulation-of-peptidyl-serine-phosphorylation	1.2511e-07	0.399065	1	0.836	0.00115715	1	go-regulation-of-peptidyl-serine-phosphorylation
go-sarcolemma	1.29028e-07	0.286984	1	0.626	0.00119338	1	go-sarcolemma
go-nucleoside-triphosphate-metabolic-process	1.31347e-07	0.271758	1	1	0.00121482	1	go-nucleoside-triphosphate-metabolic-process
go-lytic-vacuole-organization	1.49873e-07	0.273144	1	1	0.00138617	1	go-lytic-vacuole-organization
go-cis-golgi-network	1.56872e-07	0.394986	1	0.994	0.00145091	1	go-cis-golgi-network
go-regulation-of-vacuole-organization	1.62437e-07	0.294444	1	0.999	0.00150238	1	go-regulation-of-vacuole-organization
go-regulation-of-actomyosin-structure-organization	1.75547e-07	0.304452	1	0.999	0.00162363	1	go-regulation-of-actomyosin-structure-organization
go-response-to-platelet-derived-growth-factor	1.78839e-07	0.538837	1	0.977	0.00165408	1	go-response-to-platelet-derived-growth-factor
go-ribonucleoprotein-complex-disassembly	1.80299e-07	0.343311	1	0.991	0.00166759	1	go-ribonucleoprotein-complex-disassembly
go-negative-regulation-of-substrate-adhesion-dependent-cell-spreading	1.84498e-07	0.422265	1	0.902	0.00170642	1	go-negative-regulation-of-substrate-adhesion-dependent-cell-spreading
go-mks-complex	1.89697e-07	0.311285	0.902	0.708	0.0017545	1	go-mks-complex
go-intraciliary-transport-particle	1.89906e-07	0.492736	1	0.892	0.00175644	1	go-intraciliary-transport-particle
go-protein-localization-to-basolateral-plasma-membrane	2.10337e-07	0.325426	1	0.869	0.00194541	1	go-protein-localization-to-basolateral-plasma-membrane
go-nitric-oxide-synthase-regulator-activity	2.27254e-07	0.423946	1	1	0.00210187	1	go-nitric-oxide-synthase-regulator-activity
go-regulation-of-nervous-system-development	2.72235e-07	0.419812	1	0.909	0.0025179	1	go-regulation-of-nervous-system-development
go-negative-regulation-of-cell-matrix-adhesion	2.79282e-07	0.360678	1	0.761	0.00258308	1	go-negative-regulation-of-cell-matrix-adhesion
go-sphingomyelin-biosynthetic-process	2.79842e-07	0.461225	0.902	0.793	0.00258826	1	go-sphingomyelin-biosynthetic-process
go-basal-cortex	3.04855e-07	0.376641	0.848	0.669	0.00281961	1	go-basal-cortex
go-tertiary-granule-lumen	3.13437e-07	0.458994	1	0.997	0.00289898	1	go-tertiary-granule-lumen
go-mesenchymal-cell-differentiation	3.3798e-07	0.431393	1	0.796	0.00312598	1	go-mesenchymal-cell-differentiation
go-positive-regulation-of-arp2-3-complex-mediated-actin-nucleation	3.57849e-07	0.472679	1	0.955	0.00330975	1	go-positive-regulation-of-arp2-3-complex-mediated-actin-nucleation
go-golgi-stack	3.60027e-07	0.264014	1	1	0.00332989	1	go-golgi-stack
go-sulfur-compound-metabolic-process	3.82259e-07	0.250111	1	0.988	0.00353551	1	go-sulfur-compound-metabolic-process
go-neuron-projection-extension	4.17565e-07	0.437992	1	0.984	0.00386206	1	go-neuron-projection-extension
go-adenyl-nucleotide-exchange-factor-activity	4.21647e-07	0.499996	1	0.958	0.00389981	1	go-adenyl-nucleotide-exchange-factor-activity
go-positive-regulation-of-phosphoprotein-phosphatase-activity	4.4553e-07	0.53286	1	0.988	0.00412071	1	go-positive-regulation-of-phosphoprotein-phosphatase-activity
go-glutathione-metabolic-process	4.81205e-07	0.496181	1	0.961	0.00445066	1	go-glutathione-metabolic-process
go-dna-dealkylation-involved-in-dna-repair	5.33856e-07	0.441347	0.989	0.952	0.00493763	1	go-dna-dealkylation-involved-in-dna-repair
go-regulation-of-dna-binding-transcription-factor-activity	5.46245e-07	0.378247	1	0.991	0.00505222	1	go-regulation-of-dna-binding-transcription-factor-activity
go-pyridine-containing-compound-metabolic-process	5.65381e-07	0.506993	0.989	0.905	0.00522921	1	go-pyridine-containing-compound-metabolic-process
go-aspartate-family-amino-acid-biosynthetic-process	5.8391e-07	0.436739	1	0.98	0.00540059	1	go-aspartate-family-amino-acid-biosynthetic-process
go-amino-sugar-biosynthetic-process	6.55986e-07	0.546024	1	0.946	0.00606721	1	go-amino-sugar-biosynthetic-process
go-intraciliary-transport-particle-b	6.66152e-07	0.466038	1	0.899	0.00616124	1	go-intraciliary-transport-particle-b
go-platelet-derived-growth-factor-receptor-alpha-signaling-pathway	6.86254e-07	0.278785	0.967	0.845	0.00634716	1	go-platelet-derived-growth-factor-receptor-alpha-signaling-pathway
go-regulation-of-erythrocyte-differentiation	6.91278e-07	0.419816	1	0.996	0.00639363	1	go-regulation-of-erythrocyte-differentiation
go-negative-regulation-of-neuron-differentiation	7.36944e-07	0.535719	1	0.888	0.006816	1	go-negative-regulation-of-neuron-differentiation
go-glutathione-derivative-biosynthetic-process	7.49871e-07	0.446057	1	0.98	0.00693556	1	go-glutathione-derivative-biosynthetic-process
go-endoplasmic-reticulum-tubular-network	7.65321e-07	0.427294	1	0.997	0.00707846	1	go-endoplasmic-reticulum-tubular-network
go-oxidoreductase-activity-acting-on-the-aldehyde-or-oxo-group-of-donors-nad-or-nadp-as-acceptor	7.99024e-07	0.414036	1	0.984	0.00739017	1	go-oxidoreductase-activity-acting-on-the-aldehyde-or-oxo-group-of-donors-nad-or-nadp-as-acceptor
go-regulation-of-cell-projection-assembly	9.06766e-07	0.277013	1	0.999	0.00838668	1	go-regulation-of-cell-projection-assembly
go-platelet-derived-growth-factor-receptor-beta-signaling-pathway	1.02467e-06	0.347384	1	0.891	0.00947721	1	go-platelet-derived-growth-factor-receptor-beta-signaling-pathway
go-positive-regulation-of-extrinsic-apoptotic-signaling-pathway-in-absence-of-ligand	1.03868e-06	0.514436	1	0.978	0.00960675	1	go-positive-regulation-of-extrinsic-apoptotic-signaling-pathway-in-absence-of-ligand
go-erbb-signaling-pathway	1.08948e-06	0.298625	1	1	0.0100766	1	go-erbb-signaling-pathway
go-regulation-of-map-kinase-activity	1.22528e-06	0.408802	1	0.982	0.0113326	1	go-regulation-of-map-kinase-activity
go-negative-regulation-of-stress-activated-protein-kinase-signaling-cascade	1.25628e-06	0.405492	1	0.996	0.0116193	1	go-negative-regulation-of-stress-activated-protein-kinase-signaling-cascade
go-embryonic-morphogenesis1	1.36416e-06	0.290562	1	0.78	0.0126171	1	go-embryonic-morphogenesis
go-forebrain-development1	1.43275e-06	0.494985	1	0.914	0.0132515	1	go-forebrain-development
go-positive-regulation-of-protein-serine-threonine-kinase-activity	1.44751e-06	0.323748	1	0.999	0.013388	1	go-positive-regulation-of-protein-serine-threonine-kinase-activity
go-cell-part-morphogenesis	1.50976e-06	0.334151	1	0.994	0.0139638	1	go-cell-part-morphogenesis
go-protein-retention-in-er-lumen	1.58625e-06	0.408246	1	0.984	0.0146712	1	go-protein-retention-in-er-lumen
go-regulation-of-cytoplasmic-transport	1.63395e-06	0.3688	1	0.984	0.0151124	1	go-regulation-of-cytoplasmic-transport
go-endosome-to-lysosome-transport	1.77675e-06	0.331063	1	0.993	0.0164332	1	go-endosome-to-lysosome-transport
go-mitochondrial-acetyl-coa-biosynthetic-process-from-pyruvate	1.85619e-06	0.314505	1	0.961	0.0171679	1	go-mitochondrial-acetyl-coa-biosynthetic-process-from-pyruvate
go-regulation-of-axonogenesis	1.97305e-06	0.437947	1	0.955	0.0182487	1	go-regulation-of-axonogenesis
go-response-to-interferon-alpha	2.01477e-06	0.421291	1	0.939	0.0186346	1	go-response-to-interferon-alpha
go-negative-regulation-of-protein-complex-disassembly	2.01851e-06	0.600106	1	0.993	0.0186692	1	go-negative-regulation-of-protein-complex-disassembly
go-monosaccharide-binding	2.35932e-06	0.351249	1	0.975	0.0218214	1	go-monosaccharide-binding
go-caveola	2.57597e-06	0.293924	1	0.838	0.0238252	1	go-caveola
go-cytoskeletal-adaptor-activity	2.68339e-06	0.346048	0.978	0.836	0.0248187	1	go-cytoskeletal-adaptor-activity
go-transforming-growth-factor-beta-receptor-cytoplasmic-mediator-activity	2.77992e-06	0.282501	0.989	0.845	0.0257115	1	go-transforming-growth-factor-beta-receptor-cytoplasmic-mediator-activity
go-regulation-of-response-to-oxidative-stress	3.34901e-06	0.394285	1	0.996	0.030975	1	go-regulation-of-response-to-oxidative-stress
go-protein-deglycosylation	3.61566e-06	0.262438	1	0.996	0.0334413	1	go-protein-deglycosylation
go-negative-regulation-of-t-cell-receptor-signaling-pathway	3.64879e-06	0.354959	1	0.832	0.0337477	1	go-negative-regulation-of-t-cell-receptor-signaling-pathway
go-negative-regulation-of-nucleocytoplasmic-transport	3.8933e-06	0.491667	1	0.991	0.0360091	1	go-negative-regulation-of-nucleocytoplasmic-transport
go-mitochondrial-calcium-ion-homeostasis	4.46834e-06	0.392418	1	0.98	0.0413277	1	go-mitochondrial-calcium-ion-homeostasis
go-positive-regulation-of-cell-development	4.92353e-06	0.339278	1	0.997	0.0455377	1	go-positive-regulation-of-cell-development
go-positive-regulation-by-host-of-viral-genome-replication	5.33409e-06	0.414365	1	0.994	0.049335	1	go-positive-regulation-by-host-of-viral-genome-replication
go-f-actin-capping-protein-complex	5.43534e-06	0.421491	1	0.993	0.0502715	1	go-f-actin-capping-protein-complex
go-luteolysis	5.91703e-06	0.342699	0.967	0.847	0.0547266	1	go-luteolysis
go-negative-regulation-of-autophagy	6.25471e-06	0.361513	1	0.972	0.0578498	1	go-negative-regulation-of-autophagy
go-corpus-callosum-development	6.51044e-06	0.275207	0.989	0.815	0.0602151	1	go-corpus-callosum-development
go-scar-complex	7.29431e-06	0.403519	1	0.982	0.0674651	1	go-scar-complex
go-rrna-containing-ribonucleoprotein-complex-export-from-nucleus	7.78349e-06	0.260592	1	0.997	0.0719895	1	go-rrna-containing-ribonucleoprotein-complex-export-from-nucleus
go-membrane-protein-proteolysis	7.87317e-06	0.387495	1	0.975	0.072819	1	go-membrane-protein-proteolysis
go-peptidyl-serine-modification	8.2654e-06	0.288131	1	1	0.0764467	1	go-peptidyl-serine-modification
go-negative-regulation-of-small-gtpase-mediated-signal-transduction	8.68344e-06	0.309265	1	0.92	0.0803132	1	go-negative-regulation-of-small-gtpase-mediated-signal-transduction
go-cardiolipin-metabolic-process	8.80595e-06	0.464618	1	0.921	0.0814462	1	go-cardiolipin-metabolic-process
go-purine-nucleoside-diphosphate-biosynthetic-process	9.71759e-06	0.466065	0.989	0.969	0.089878	1	go-purine-nucleoside-diphosphate-biosynthetic-process
go-5-phosphoribose-1-diphosphate-biosynthetic-process	1.03355e-05	0.269026	0.761	0.644	0.0955931	1	go-5-phosphoribose-1-diphosphate-biosynthetic-process
go-cerebral-cortex-development	1.06142e-05	0.330479	1	1	0.098171	1	go-cerebral-cortex-development
go-positive-regulation-of-protein-targeting-to-membrane	1.13617e-05	0.417959	1	0.965	0.105084	1	go-positive-regulation-of-protein-targeting-to-membrane
go-sphingolipid-metabolic-process	1.1365e-05	0.352613	1	0.99	0.105115	1	go-sphingolipid-metabolic-process
go-ubiquitin-like-modifier-activating-enzyme-activity	1.14425e-05	0.367325	1	0.982	0.105831	1	go-ubiquitin-like-modifier-activating-enzyme-activity
go-recycling-endosome-membrane	1.17326e-05	0.276258	1	0.999	0.108515	1	go-recycling-endosome-membrane
go-membrane-biogenesis	1.26156e-05	0.435123	1	0.994	0.116682	1	go-membrane-biogenesis
go-regulation-of-autophagosome-assembly	1.31994e-05	0.291342	1	0.996	0.122081	1	go-regulation-of-autophagosome-assembly
go-response-to-estradiol	1.3795e-05	0.288079	0.989	0.759	0.12759	1	go-response-to-estradiol
go-bloc-1-complex	1.56962e-05	0.361269	1	0.985	0.145174	1	go-bloc-1-complex
go-axon	1.57301e-05	0.450799	1	0.975	0.145488	1	go-axon
go-camp-response-element-binding	1.78973e-05	0.451914	0.978	0.958	0.165532	1	go-camp-response-element-binding
go-mrna-3-utr-au-rich-region-binding	1.8341e-05	0.401037	0.978	0.958	0.169636	1	go-mrna-3-utr-au-rich-region-binding
go-endosomal-vesicle-fusion	1.85095e-05	0.372105	0.924	0.778	0.171195	1	go-endosomal-vesicle-fusion
go-vesicle-fusion-with-golgi-apparatus	1.87887e-05	0.322706	1	0.947	0.173777	1	go-vesicle-fusion-with-golgi-apparatus
go-endoplasmic-reticulum-subcompartment	1.91014e-05	0.404503	1	0.997	0.176668	1	go-endoplasmic-reticulum-subcompartment
go-autolysosome	1.93146e-05	0.334591	1	0.999	0.17864	1	go-autolysosome
go-regulation-of-ras-protein-signal-transduction	1.95238e-05	0.375472	1	0.964	0.180576	1	go-regulation-of-ras-protein-signal-transduction
go-negative-regulation-of-autophagosome-assembly	2.02731e-05	0.277685	1	0.866	0.187506	1	go-negative-regulation-of-autophagosome-assembly
go-actin-filament	2.07796e-05	0.29131	1	0.997	0.192191	1	go-actin-filament
go-cardiac-septum-development1	2.14832e-05	0.363133	0.989	0.834	0.198698	1	go-cardiac-septum-development
go-protein-oxidation	2.2997e-05	0.418225	1	0.975	0.212699	1	go-protein-oxidation
go-synaptic-vesicle-cytoskeletal-transport	2.44573e-05	0.373421	1	0.978	0.226205	1	go-synaptic-vesicle-cytoskeletal-transport
go-progesterone-receptor-signaling-pathway	2.58209e-05	0.336766	0.989	0.937	0.238818	1	go-progesterone-receptor-signaling-pathway
go-membrane-protein-ectodomain-proteolysis	2.65765e-05	0.382299	1	0.969	0.245806	1	go-membrane-protein-ectodomain-proteolysis
go-ruffle-membrane	2.66395e-05	0.30019	1	0.997	0.246389	1	go-ruffle-membrane
go-microtubule-polymerization-or-depolymerization	2.75261e-05	0.34109	1	0.987	0.254589	1	go-microtubule-polymerization-or-depolymerization
go-axon-part	2.81329e-05	0.408802	1	0.987	0.260201	1	go-axon-part
go-lewy-body	3.10248e-05	0.298423	1	0.996	0.286948	1	go-lewy-body
go-regulation-of-protein-maturation	3.10554e-05	0.349006	1	0.818	0.287231	1	go-regulation-of-protein-maturation
go-positive-regulation-of-phosphorus-metabolic-process	3.41426e-05	0.252272	1	0.915	0.315785	1	go-positive-regulation-of-phosphorus-metabolic-process
go-regulation-of-pinocytosis	3.43462e-05	0.393032	1	0.93	0.317668	1	go-regulation-of-pinocytosis
go-response-to-testosterone	3.4565e-05	0.403469	1	0.975	0.319692	1	go-response-to-testosterone
go-positive-regulation-of-dna-binding-transcription-factor-activity	3.70245e-05	0.287864	1	0.965	0.34244	1	go-positive-regulation-of-dna-binding-transcription-factor-activity
go-regulation-of-cell-cycle-g1-s-phase-transition	3.80013e-05	0.318652	1	0.993	0.351474	1	go-regulation-of-cell-cycle-g1-s-phase-transition
go-uv-protection	4.36564e-05	0.467527	0.978	0.899	0.403778	1	go-uv-protection
go-phagocytic-vesicle-membrane	4.55704e-05	0.312882	1	0.994	0.421481	1	go-phagocytic-vesicle-membrane
go-regulation-of-epithelial-to-mesenchymal-transition	4.86925e-05	0.274554	0.989	0.853	0.450357	1	go-regulation-of-epithelial-to-mesenchymal-transition
go-post-embryonic-animal-organ-development	4.9814e-05	0.397335	1	0.975	0.460729	1	go-post-embryonic-animal-organ-development
go-tertiary-granule	5.28562e-05	0.263551	1	0.997	0.488867	1	go-tertiary-granule
go-positive-regulation-of-oxidative-stress-induced-intrinsic-apoptotic-signaling-pathway	6.41189e-05	0.352391	1	0.984	0.593036	1	go-positive-regulation-of-oxidative-stress-induced-intrinsic-apoptotic-signaling-pathway
go-myelin-sheath-adaxonal-region	6.6222e-05	0.261462	1	0.942	0.612488	1	go-myelin-sheath-adaxonal-region
go-regulation-of-response-to-biotic-stimulus	7.34278e-05	0.290845	0.978	0.882	0.679134	1	go-regulation-of-response-to-biotic-stimulus
go-positive-regulation-of-extrinsic-apoptotic-signaling-pathway-via-death-domain-receptors	7.86196e-05	0.324403	1	0.931	0.727153	1	go-positive-regulation-of-extrinsic-apoptotic-signaling-pathway-via-death-domain-receptors
go-myelin-assembly	8.66068e-05	0.313927	0.967	0.908	0.801026	1	go-myelin-assembly
go-rho-protein-signal-transduction	8.67544e-05	0.353367	1	0.966	0.802391	1	go-rho-protein-signal-transduction
go-urogenital-system-development1	9.10675e-05	0.2813	1	0.86	0.842283	1	go-urogenital-system-development
go-supramolecular-complex	9.88996e-05	0.33871	1	0.965	0.914723	1	go-supramolecular-complex
go-transcription-factor-tfiih-core-complex	0.000101526	0.359462	0.989	0.895	0.939018	1	go-transcription-factor-tfiih-core-complex
go-gamma-secretase-complex	0.000102329	0.335131	0.978	0.923	0.94644	1	go-gamma-secretase-complex
go-response-to-interferon-beta	0.000104597	0.331254	1	0.939	0.96742	1	go-response-to-interferon-beta
go-udp-n-acetylglucosamine-biosynthetic-process	0.000111783	0.407861	0.989	0.949	1	1	go-udp-n-acetylglucosamine-biosynthetic-process
go-epiboly	0.000116372	0.361723	1	0.984	1	1	go-epiboly
go-positive-regulation-of-dephosphorylation	0.000119954	0.348863	1	0.996	1	1	go-positive-regulation-of-dephosphorylation
go-protein-processing	0.00014896	0.265921	1	0.982	1	1	go-protein-processing
go-positive-regulation-of-protein-export-from-nucleus	0.000150456	0.292225	1	1	1	1	go-positive-regulation-of-protein-export-from-nucleus
go-positive-regulation-of-vacuole-organization	0.000155323	0.308283	1	0.994	1	1	go-positive-regulation-of-vacuole-organization
go-positive-regulation-of-endocytosis	0.000155632	0.269881	1	0.999	1	1	go-positive-regulation-of-endocytosis
go-snap-receptor-activity	0.000158753	0.284875	1	0.987	1	1	go-snap-receptor-activity
go-leydig-cell-differentiation	0.000160298	0.309101	1	0.964	1	1	go-leydig-cell-differentiation
go-tpr-domain-binding	0.000166161	0.393657	1	0.987	1	1	go-tpr-domain-binding
go-pigment-biosynthetic-process	0.000170491	0.270191	1	0.988	1	1	go-pigment-biosynthetic-process
go-nedd8-transferase-activity	0.00020073	0.312039	1	0.981	1	1	go-nedd8-transferase-activity
go-negative-regulation-of-jnk-cascade	0.000220241	0.363703	0.989	0.987	1	1	go-negative-regulation-of-jnk-cascade
go-l-ascorbic-acid-binding	0.000224421	0.342665	1	0.896	1	1	go-l-ascorbic-acid-binding
go-actin-cytoskeleton-reorganization	0.000227422	0.292075	1	0.984	1	1	go-actin-cytoskeleton-reorganization
go-regulation-of-lysosome-organization	0.000239706	0.320171	0.946	0.879	1	1	go-regulation-of-lysosome-organization
go-response-to-cadmium-ion	0.000247192	0.301169	1	0.994	1	1	go-response-to-cadmium-ion
go-lamellipodium-assembly	0.00024911	0.302218	1	0.991	1	1	go-lamellipodium-assembly
go-regulation-of-extent-of-cell-growth1	0.00026539	0.276658	1	0.959	1	1	go-regulation-of-extent-of-cell-growth
go-gastrulation1	0.000274297	0.308389	1	0.991	1	1	go-gastrulation
go-regulation-of-ruffle-assembly	0.000279058	0.380934	1	0.975	1	1	go-regulation-of-ruffle-assembly
go-regulation-of-protein-targeting-to-membrane	0.00028705	0.337965	1	0.95	1	1	go-regulation-of-protein-targeting-to-membrane
go-regulation-of-microtubule-polymerization	0.000312572	0.361632	0.989	0.958	1	1	go-regulation-of-microtubule-polymerization
go-positive-regulation-of-cellular-response-to-transforming-growth-factor-beta-stimulus	0.00031956	0.290509	1	0.966	1	1	go-positive-regulation-of-cellular-response-to-transforming-growth-factor-beta-stimulus
go-regulation-of-lamellipodium-organization	0.000368382	0.309322	1	0.988	1	1	go-regulation-of-lamellipodium-organization
go-cellular-response-to-dsrna	0.000386082	0.300886	0.989	0.94	1	1	go-cellular-response-to-dsrna
go-response-to-alcohol	0.000400728	0.338693	1	0.955	1	1	go-response-to-alcohol
go-histone-h2b-ubiquitination	0.000402375	0.296417	0.978	0.978	1	1	go-histone-h2b-ubiquitination
go-entry-into-other-organism-involved-in-symbiotic-interaction	0.000428019	0.259961	1	0.997	1	1	go-entry-into-other-organism-involved-in-symbiotic-interaction
go-regulation-of-er-to-golgi-vesicle-mediated-transport	0.000442624	0.315631	1	0.994	1	1	go-regulation-of-er-to-golgi-vesicle-mediated-transport
go-neuron-spine	0.000499284	0.287437	1	0.972	1	1	go-neuron-spine
go-synapse	0.000508606	0.266182	1	0.977	1	1	go-synapse
go-positive-regulation-of-neuron-apoptotic-process	0.000529667	0.389578	1	0.987	1	1	go-positive-regulation-of-neuron-apoptotic-process
go-developmental-growth-involved-in-morphogenesis	0.000575757	0.291515	0.989	0.915	1	1	go-developmental-growth-involved-in-morphogenesis
go-endolysosome	0.000599938	0.290171	1	1	1	1	go-endolysosome
go-negative-regulation-of-transcription-from-rna-polymerase-ii-promoter-in-response-to-stress	0.000622837	0.278833	0.989	0.945	1	1	go-negative-regulation-of-transcription-from-rna-polymerase-ii-promoter-in-response-to-stress
go-cellular-response-to-drug	0.000725656	0.262744	1	0.99	1	1	go-cellular-response-to-drug
go-membrane-protein-intracellular-domain-proteolysis	0.000778044	0.33195	0.989	0.959	1	1	go-membrane-protein-intracellular-domain-proteolysis
go-regulation-of-keratinocyte-migration	0.000785886	0.253502	1	0.937	1	1	go-regulation-of-keratinocyte-migration
go-notch-receptor-processing-ligand-dependent	0.000852172	0.252245	1	0.92	1	1	go-notch-receptor-processing-ligand-dependent
go-protein-localization-to-phagophore-assembly-site	0.000861568	0.295063	1	0.977	1	1	go-protein-localization-to-phagophore-assembly-site
go-positive-regulation-of-mitochondrial-calcium-ion-concentration	0.000989058	0.287998	1	0.982	1	1	go-positive-regulation-of-mitochondrial-calcium-ion-concentration
go-nucleotide-sugar-metabolic-process	0.000994312	0.285336	1	0.993	1	1	go-nucleotide-sugar-metabolic-process
go-podosome	0.00102807	0.256548	1	0.997	1	1	go-podosome
go-divalent-inorganic-cation-transmembrane-transporter-activity	0.00110699	0.272803	0.957	0.888	1	1	go-divalent-inorganic-cation-transmembrane-transporter-activity
go-regulation-of-lamellipodium-assembly	0.00119007	0.292616	1	0.959	1	1	go-regulation-of-lamellipodium-assembly
go-negative-regulation-of-macroautophagy	0.00125999	0.269246	0.978	0.904	1	1	go-negative-regulation-of-macroautophagy
go-golgi-to-vacuole-transport	0.0012691	0.285676	0.989	0.94	1	1	go-golgi-to-vacuole-transport
go-response-to-lead-ion	0.00141437	0.278537	1	0.994	1	1	go-response-to-lead-ion
go-heterochromatin-organization	0.0014551	0.34224	0.989	0.945	1	1	go-heterochromatin-organization
go-positive-regulation-of-mitophagy	0.0017965	0.285245	1	0.975	1	1	go-positive-regulation-of-mitophagy
go-cellular-senescence	0.00186091	0.308063	1	0.974	1	1	go-cellular-senescence
go-regulation-of-smad-protein-signal-transduction	0.00189282	0.25575	0.989	0.927	1	1	go-regulation-of-smad-protein-signal-transduction
go-pigment-granule-maturation	0.00191458	0.287786	1	0.971	1	1	go-pigment-granule-maturation
go-negative-regulation-of-cell-junction-assembly	0.00206892	0.286946	1	0.937	1	1	go-negative-regulation-of-cell-junction-assembly
go-negative-regulation-of-adherens-junction-organization	0.00221242	0.315079	1	0.972	1	1	go-negative-regulation-of-adherens-junction-organization
go-trans-golgi-network-membrane	0.00238667	0.275867	1	0.985	1	1	go-trans-golgi-network-membrane
go-modulation-by-host-of-viral-process	0.00240241	0.263848	1	0.997	1	1	go-modulation-by-host-of-viral-process
go-pyruvate-dehydrogenase-complex	0.002404	0.298594	0.957	0.94	1	1	go-pyruvate-dehydrogenase-complex
go-nucleotide-phosphorylation	0.00251909	0.332214	1	0.975	1	1	go-nucleotide-phosphorylation
go-golgi-cisterna-membrane	0.00258068	0.257309	0.978	0.955	1	1	go-golgi-cisterna-membrane
go-retinoic-acid-receptor-binding	0.00260703	0.265116	1	0.994	1	1	go-retinoic-acid-receptor-binding
go-negative-regulation-of-protein-kinase-activity-by-regulation-of-protein-phosphorylation	0.00263637	0.302758	1	0.961	1	1	go-negative-regulation-of-protein-kinase-activity-by-regulation-of-protein-phosphorylation
go-oxidoreductase-activity-acting-on-a-sulfur-group-of-donors-nad-p-as-acceptor1	0.00265414	0.256265	1	1	1	1	go-oxidoreductase-activity-acting-on-a-sulfur-group-of-donors-nad-p-as-acceptor
go-peptide-transmembrane-transporter-activity	0.00290621	0.338833	1	0.993	1	1	go-peptide-transmembrane-transporter-activity
go-positive-regulation-of-plasma-membrane-bounded-cell-projection-assembly	0.00293922	0.294314	1	0.994	1	1	go-positive-regulation-of-plasma-membrane-bounded-cell-projection-assembly
go-regulation-of-cell-aging	0.00310114	0.297662	0.989	0.933	1	1	go-regulation-of-cell-aging
go-negative-regulation-of-protein-export-from-nucleus	0.00322599	0.294718	1	0.978	1	1	go-negative-regulation-of-protein-export-from-nucleus
go-quinone-metabolic-process	0.00342913	0.302384	0.946	0.923	1	1	go-quinone-metabolic-process
go-corticosteroid-receptor-signaling-pathway	0.00367928	0.298116	1	0.946	1	1	go-corticosteroid-receptor-signaling-pathway
go-regulation-of-deacetylase-activity	0.00389703	0.267667	0.978	0.891	1	1	go-regulation-of-deacetylase-activity
go-microtubule-end	0.00390801	0.313984	1	0.971	1	1	go-microtubule-end
go-mitochondria-associated-endoplasmic-reticulum-membrane	0.00429296	0.364554	0.989	0.982	1	1	go-mitochondria-associated-endoplasmic-reticulum-membrane
go-nucleoside-diphosphate-kinase-activity	0.00479761	0.302809	0.978	0.949	1	1	go-nucleoside-diphosphate-kinase-activity
go-cellular-protein-containing-complex-localization	0.00544219	0.258781	0.957	0.924	1	1	go-cellular-protein-containing-complex-localization
go-telomerase-holoenzyme-complex-assembly	0.00560221	0.261052	1	0.996	1	1	go-telomerase-holoenzyme-complex-assembly
go-rap-protein-signal-transduction	0.00591623	0.283329	1	0.994	1	1	go-rap-protein-signal-transduction
go-positive-regulation-of-erythrocyte-differentiation	0.00612432	0.253868	1	0.965	1	1	go-positive-regulation-of-erythrocyte-differentiation
go-receptor-tyrosine-kinase-binding	0.00624597	0.2993	1	0.985	1	1	go-receptor-tyrosine-kinase-binding
go-ion-channel-binding	0.00742387	0.280767	1	0.974	1	1	go-ion-channel-binding
go-negative-regulation-of-telomere-capping	0.00864546	0.253983	0.989	0.934	1	1	go-negative-regulation-of-telomere-capping
go-ncrna-metabolic-process	1.18812e-40	0.872319	1	0.999	1.09889e-36	2	go-ncrna-metabolic-process
go-ncrna-processing	7.96916e-40	0.924713	1	0.996	7.37067e-36	2	go-ncrna-processing
go-dna-replication-initiation	1.77263e-38	1.42662	1	0.739	1.6395e-34	2	go-dna-replication-initiation
go-ribosome-biogenesis	2.07538e-38	0.747776	1	0.999	1.91952e-34	2	go-ribosome-biogenesis
go-transferase-activity-transferring-one-carbon-groups	5.01924e-38	1.0585	1	0.954	4.64229e-34	2	go-transferase-activity-transferring-one-carbon-groups
go-catalytic-activity-acting-on-dna	6.02759e-38	1.03023	1	1	5.57492e-34	2	go-catalytic-activity-acting-on-dna
go-dna-dependent-dna-replication	6.13402e-38	1.47448	1	0.945	5.67335e-34	2	go-dna-dependent-dna-replication
go-dna-replication-preinitiation-complex	9.35683e-38	0.70213	1	0.31	8.65414e-34	2	go-dna-replication-preinitiation-complex
go-single-stranded-dna-dependent-atpase-activity	1.61852e-37	1.2979	1	0.521	1.49697e-33	2	go-single-stranded-dna-dependent-atpase-activity
go-methylation	2.35763e-37	0.746519	1	0.999	2.18058e-33	2	go-methylation
go-dna-replication-origin-binding	2.72887e-37	1.329	1	0.891	2.52393e-33	2	go-dna-replication-origin-binding
go-chromosome-passenger-complex	5.41008e-37	0.42103	0.988	0.294	5.00378e-33	2	go-chromosome-passenger-complex
go-double-strand-break-repair	5.47532e-37	1.07595	1	1	5.06412e-33	2	go-double-strand-break-repair
go-pyrimidine-nucleoside-triphosphate-biosynthetic-process	1.5827e-36	1.11024	1	0.887	1.46384e-32	2	go-pyrimidine-nucleoside-triphosphate-biosynthetic-process
go-rrna-metabolic-process	1.65418e-36	0.75101	1	0.997	1.52995e-32	2	go-rrna-metabolic-process
go-dna-metabolic-process	2.06172e-36	0.75094	1	1	1.90688e-32	2	go-dna-metabolic-process
go-preribosome	2.40319e-36	0.850794	1	0.99	2.22271e-32	2	go-preribosome
go-positive-regulation-of-cell-cycle-g2-m-phase-transition	7.81547e-36	1.2367	1	0.927	7.22853e-32	2	go-positive-regulation-of-cell-cycle-g2-m-phase-transition
go-dna-helicase-activity	1.42848e-35	0.860315	1	1	1.3212e-31	2	go-dna-helicase-activity
go-catalytic-activity-acting-on-rna	4.11176e-35	0.638964	1	1	3.80297e-31	2	go-catalytic-activity-acting-on-rna
go-trna-metabolic-process	6.2066e-35	0.78859	1	1	5.74049e-31	2	go-trna-metabolic-process
go-dna-repair	1.07288e-34	0.727816	1	1	9.92309e-31	2	go-dna-repair
go-macromolecule-methylation	2.1764e-34	0.657868	1	0.999	2.01295e-30	2	go-macromolecule-methylation
go-ribonucleoprotein-complex-biogenesis	2.1764e-34	0.447297	1	1	2.01295e-30	2	go-ribonucleoprotein-complex-biogenesis
go-rna-modification	2.54201e-34	0.918526	1	0.993	2.3511e-30	2	go-rna-modification
go-dna-replication	4.45762e-34	1.18531	1	1	4.12285e-30	2	go-dna-replication
go-dna-dependent-atpase-activity	1.16824e-33	0.774592	1	1	1.0805e-29	2	go-dna-dependent-atpase-activity
go-recombinational-repair	1.2854e-33	1.20206	1	0.98	1.18887e-29	2	go-recombinational-repair
go-negative-regulation-of-metaphase-anaphase-transition-of-cell-cycle	1.43366e-33	1.13899	1	0.997	1.32599e-29	2	go-negative-regulation-of-metaphase-anaphase-transition-of-cell-cycle
go-dna-conformation-change	1.55788e-33	0.965072	1	1	1.44089e-29	2	go-dna-conformation-change
go-replication-fork-protection-complex	1.63546e-33	1.07845	1	0.476	1.51264e-29	2	go-replication-fork-protection-complex
go-chromosome-organization	1.79292e-33	0.652168	1	1	1.65827e-29	2	go-chromosome-organization
go-positive-regulation-of-cell-cycle-phase-transition	1.85078e-33	1.08406	1	0.986	1.71179e-29	2	go-positive-regulation-of-cell-cycle-phase-transition
go-regulation-of-gene-silencing	2.11644e-33	0.624017	1	1	1.9575e-29	2	go-regulation-of-gene-silencing
go-cellular-response-to-dna-damage-stimulus	2.37376e-33	0.584205	1	1	2.19549e-29	2	go-cellular-response-to-dna-damage-stimulus
go-cell-cycle-dna-replication	2.38081e-33	1.26064	1	0.96	2.20201e-29	2	go-cell-cycle-dna-replication
go-nuclear-dna-replication	3.00434e-33	1.26925	1	0.905	2.77872e-29	2	go-nuclear-dna-replication
go-negative-regulation-of-chromosome-segregation	3.43353e-33	1.10136	1	1	3.17568e-29	2	go-negative-regulation-of-chromosome-segregation
go-trna-processing	3.99884e-33	0.897232	1	0.99	3.69853e-29	2	go-trna-processing
go-trna-modification	4.01879e-33	0.971719	1	0.97	3.71697e-29	2	go-trna-modification
go-negative-regulation-of-chromosome-organization	4.15432e-33	0.690269	1	1	3.84233e-29	2	go-negative-regulation-of-chromosome-organization
go-dna-recombination	4.23404e-33	1.05741	1	0.991	3.91607e-29	2	go-dna-recombination
go-condensed-chromosome-outer-kinetochore	4.78278e-33	1.20584	1	0.584	4.42359e-29	2	go-condensed-chromosome-outer-kinetochore
go-maturation-of-5-8s-rrna	4.79601e-33	1.02779	1	0.934	4.43583e-29	2	go-maturation-of-5-8s-rrna
go-negative-regulation-of-response-to-dna-damage-stimulus	5.77687e-33	0.798504	1	1	5.34303e-29	2	go-negative-regulation-of-response-to-dna-damage-stimulus
go-hydrolase-activity-acting-on-acid-anhydrides	6.19358e-33	0.35405	1	1	5.72845e-29	2	go-hydrolase-activity-acting-on-acid-anhydrides
go-catalytic-activity-acting-on-a-trna	8.60484e-33	0.799196	1	0.996	7.95861e-29	2	go-catalytic-activity-acting-on-a-trna
go-dna-packaging	9.01675e-33	1.30392	1	0.924	8.33959e-29	2	go-dna-packaging
go-regulation-of-posttranscriptional-gene-silencing	1.05308e-32	0.557398	1	1	9.73995e-29	2	go-regulation-of-posttranscriptional-gene-silencing
go-ribonucleotide-binding	1.66767e-32	0.353019	1	1	1.54243e-28	2	go-ribonucleotide-binding
go-protein-dna-complex-subunit-organization1	1.87919e-32	0.697462	1	1	1.73806e-28	2	go-protein-dna-complex-subunit-organization
go-double-strand-break-repair-via-break-induced-replication	2.18159e-32	0.321879	0.925	0.255	2.01775e-28	2	go-double-strand-break-repair-via-break-induced-replication
go-regulation-of-sister-chromatid-segregation	4.11221e-32	0.844086	1	1	3.80339e-28	2	go-regulation-of-sister-chromatid-segregation
go-replication-fork	4.66344e-32	1.19604	1	0.953	4.31321e-28	2	go-replication-fork
go-cell-cycle-checkpoint	5.83227e-32	0.877373	1	1	5.39427e-28	2	go-cell-cycle-checkpoint
go-ribosomal-large-subunit-biogenesis	8.12313e-32	1.01991	1	0.954	7.51308e-28	2	go-ribosomal-large-subunit-biogenesis
go-helicase-activity	1.207e-31	0.548395	1	1	1.11635e-27	2	go-helicase-activity
go-regulation-of-transcription-involved-in-g1-s-transition-of-mitotic-cell-cycle	1.58975e-31	1.24814	1	0.681	1.47036e-27	2	go-regulation-of-transcription-involved-in-g1-s-transition-of-mitotic-cell-cycle
go-nuclear-replication-fork	2.91458e-31	1.14029	1	0.918	2.69569e-27	2	go-nuclear-replication-fork
go-centromere-complex-assembly	3.1966e-31	1.16636	1	0.964	2.95653e-27	2	go-centromere-complex-assembly
go-chromatin-assembly	4.86935e-31	1.22636	1	0.892	4.50366e-27	2	go-chromatin-assembly
go-rna-methylation	5.82481e-31	0.944445	1	0.956	5.38737e-27	2	go-rna-methylation
go-nuclear-chromosome	5.99498e-31	0.708231	1	1	5.54475e-27	2	go-nuclear-chromosome
go-cell-division	6.21951e-31	0.799007	1	1	5.75242e-27	2	go-cell-division
go-dna-replication-independent-nucleosome-organization1	6.69358e-31	1.08767	1	0.99	6.19089e-27	2	go-dna-replication-independent-nucleosome-organization
go-adenyl-nucleotide-binding	6.77639e-31	0.411723	1	1	6.26748e-27	2	go-adenyl-nucleotide-binding
go-chromatin-remodeling-at-centromere	7.68782e-31	1.15987	1	0.881	7.11047e-27	2	go-chromatin-remodeling-at-centromere
go-chromosome-separation	8.29261e-31	1.05392	1	0.997	7.66984e-27	2	go-chromosome-separation
go-chromosome	8.39465e-31	0.69281	1	1	7.76421e-27	2	go-chromosome
go-metaphase-anaphase-transition-of-cell-cycle	8.60245e-31	0.988084	1	1	7.95641e-27	2	go-metaphase-anaphase-transition-of-cell-cycle
go-regulation-of-dna-dependent-dna-replication	9.96091e-31	1.12368	1	0.95	9.21285e-27	2	go-regulation-of-dna-dependent-dna-replication
go-sister-chromatid-segregation	1.18892e-30	0.979068	1	1	1.09963e-26	2	go-sister-chromatid-segregation
go-mitotic-sister-chromatid-segregation	1.69262e-30	0.983069	1	1	1.5655e-26	2	go-mitotic-sister-chromatid-segregation
go-telomere-maintenance-via-semi-conservative-replication	1.76682e-30	1.1249	1	0.864	1.63413e-26	2	go-telomere-maintenance-via-semi-conservative-replication
go-nucleosome-organization1	1.82071e-30	1.05412	1	0.993	1.68397e-26	2	go-nucleosome-organization
go-mitotic-cell-cycle-checkpoint	1.89987e-30	0.879706	1	0.999	1.75719e-26	2	go-mitotic-cell-cycle-checkpoint
go-chromatin-assembly-or-disassembly1	2.13148e-30	1.11233	1	0.98	1.9714e-26	2	go-chromatin-assembly-or-disassembly
go-alpha-dna-polymerase-primase-complex	2.18292e-30	0.845078	1	0.439	2.01898e-26	2	go-alpha-dna-polymerase-primase-complex
go-dna-strand-elongation-involved-in-dna-replication	2.45555e-30	1.12578	1	0.644	2.27114e-26	2	go-dna-strand-elongation-involved-in-dna-replication
go-nucleobase-biosynthetic-process	2.81621e-30	0.932044	1	0.974	2.60472e-26	2	go-nucleobase-biosynthetic-process
go-preribosome-large-subunit-precursor	2.88055e-30	0.969336	1	0.963	2.66422e-26	2	go-preribosome-large-subunit-precursor
go-mcm-complex	3.30717e-30	1.11642	1	0.664	3.05881e-26	2	go-mcm-complex
go-cell-cycle-g2-m-phase-transition	3.79156e-30	0.497032	1	1	3.50681e-26	2	go-cell-cycle-g2-m-phase-transition
go-regulation-of-chromosome-separation	5.44676e-30	0.907815	1	1	5.03771e-26	2	go-regulation-of-chromosome-separation
go-regulation-of-cell-cycle-g2-m-phase-transition	6.60492e-30	0.497655	1	1	6.10889e-26	2	go-regulation-of-cell-cycle-g2-m-phase-transition
go-rna-methyltransferase-activity	8.78667e-30	0.975605	1	0.931	8.12679e-26	2	go-rna-methyltransferase-activity
go-s-adenosylmethionine-dependent-methyltransferase-activity	9.19247e-30	0.800818	1	0.986	8.50212e-26	2	go-s-adenosylmethionine-dependent-methyltransferase-activity
go-negative-regulation-of-nuclear-division	1.04288e-29	0.985247	1	0.996	9.64557e-26	2	go-negative-regulation-of-nuclear-division
go-nucleoside-monophosphate-biosynthetic-process	1.6637e-29	0.7702	1	0.989	1.53876e-25	2	go-nucleoside-monophosphate-biosynthetic-process
go-ribonucleoside-monophosphate-biosynthetic-process	1.6734e-29	0.840806	1	0.983	1.54773e-25	2	go-ribonucleoside-monophosphate-biosynthetic-process
go-dna-strand-elongation	2.17634e-29	1.09238	1	0.798	2.0129e-25	2	go-dna-strand-elongation
go-maturation-of-5-8s-rrna-from-tricistronic-rrna-transcript-ssu-rrna-5-8s-rrna-lsu-rrna-	2.30384e-29	1.06167	1	0.901	2.13082e-25	2	go-maturation-of-5-8s-rrna-from-tricistronic-rrna-transcript-ssu-rrna-5-8s-rrna-lsu-rrna-
go-nuclear-chromosome-segregation	2.54179e-29	1.02193	1	1	2.3509e-25	2	go-nuclear-chromosome-segregation
go-90s-preribosome	2.80596e-29	0.950314	1	0.963	2.59524e-25	2	go-90s-preribosome
go-spindle-midzone	3.15281e-29	1.09648	1	0.953	2.91603e-25	2	go-spindle-midzone
go-dna-replication-checkpoint	3.58945e-29	1.11525	1	0.618	3.31988e-25	2	go-dna-replication-checkpoint
go-small-subunit-processome	4.91321e-29	0.835771	1	0.976	4.54423e-25	2	go-small-subunit-processome
go-atp-dependent-chromatin-remodeling1	5.18582e-29	0.712146	1	0.999	4.79636e-25	2	go-atp-dependent-chromatin-remodeling
go-telomere-organization	5.37348e-29	0.595255	1	1	4.96994e-25	2	go-telomere-organization
go-protein-sumoylation	5.94259e-29	0.454357	1	1	5.4963e-25	2	go-protein-sumoylation
go-cell-cycle-phase-transition	6.57145e-29	0.598726	1	1	6.07794e-25	2	go-cell-cycle-phase-transition
go-somatic-stem-cell-population-maintenance1	7.98662e-29	0.860145	1	0.996	7.38682e-25	2	go-somatic-stem-cell-population-maintenance
go-mitotic-nuclear-division	8.12939e-29	0.944459	1	1	7.51888e-25	2	go-mitotic-nuclear-division
go-3-5-dna-helicase-activity	8.75935e-29	1.08104	1	0.769	8.10152e-25	2	go-3-5-dna-helicase-activity
go-nucleobase-containing-small-molecule-biosynthetic-process	8.88162e-29	0.690892	1	0.99	8.21461e-25	2	go-nucleobase-containing-small-molecule-biosynthetic-process
go-mitochondrial-rna-metabolic-process	9.49589e-29	0.901876	1	0.956	8.78275e-25	2	go-mitochondrial-rna-metabolic-process
go-base-excision-repair	1.17632e-28	1.03769	1	0.944	1.08798e-24	2	go-base-excision-repair
go-rna-polymerase-activity	1.1926e-28	0.615459	1	0.999	1.10303e-24	2	go-rna-polymerase-activity
go-organelle-fission	1.58153e-28	1.01839	1	1	1.46276e-24	2	go-organelle-fission
go-regulation-of-dna-directed-dna-polymerase-activity	1.58861e-28	0.887224	0.988	0.446	1.46931e-24	2	go-regulation-of-dna-directed-dna-polymerase-activity
go-drug-binding	1.65761e-28	0.425169	1	1	1.53312e-24	2	go-drug-binding
go-non-recombinational-repair	2.48398e-28	0.890825	1	0.997	2.29743e-24	2	go-non-recombinational-repair
go-cleavage-involved-in-rrna-processing	3.14077e-28	0.987242	1	0.951	2.9049e-24	2	go-cleavage-involved-in-rrna-processing
go-mitotic-metaphase-plate-congression	3.82749e-28	0.952366	1	0.997	3.54004e-24	2	go-mitotic-metaphase-plate-congression
go-cell-cycle-g1-s-phase-transition	3.91782e-28	0.705465	1	0.999	3.62359e-24	2	go-cell-cycle-g1-s-phase-transition
go-chromosome-segregation	3.98696e-28	0.969089	1	1	3.68754e-24	2	go-chromosome-segregation
go-damaged-dna-binding	4.50599e-28	0.774929	1	0.999	4.16759e-24	2	go-damaged-dna-binding
go-histone-exchange	4.5289e-28	1.01626	1	0.974	4.18878e-24	2	go-histone-exchange
go-trna-transport	7.91777e-28	0.512893	1	1	7.32315e-24	2	go-trna-transport
go-metaphase-plate-congression	9.42087e-28	0.949453	1	0.997	8.71336e-24	2	go-metaphase-plate-congression
go-dna-integrity-checkpoint	1.25071e-27	0.741727	1	1	1.15679e-23	2	go-dna-integrity-checkpoint
go-nucleic-acid-phosphodiester-bond-hydrolysis	1.42832e-27	0.565756	1	1	1.32105e-23	2	go-nucleic-acid-phosphodiester-bond-hydrolysis
go-dna-clamp-loader-activity	1.61924e-27	1.05621	1	0.729	1.49764e-23	2	go-dna-clamp-loader-activity
go-regulation-of-chromosome-segregation	1.94971e-27	0.819202	1	1	1.80329e-23	2	go-regulation-of-chromosome-segregation
go-maintenance-of-cell-number1	2.45389e-27	0.523698	1	1	2.2696e-23	2	go-maintenance-of-cell-number
go-chromatin-organization	2.7055e-27	0.455632	1	1	2.50232e-23	2	go-chromatin-organization
go-y-form-dna-binding	3.0294e-27	0.461869	0.95	0.324	2.8019e-23	2	go-y-form-dna-binding
go-nucleotidyltransferase-activity	3.94916e-27	0.548014	1	0.999	3.65258e-23	2	go-nucleotidyltransferase-activity
go-dna-replication-synthesis-of-rna-primer	6.83632e-27	0.538626	0.963	0.356	6.32291e-23	2	go-dna-replication-synthesis-of-rna-primer
go-mitochondrial-gene-expression	7.48268e-27	0.452213	1	1	6.92073e-23	2	go-mitochondrial-gene-expression
go-blastocyst-development	7.78672e-27	0.672678	1	1	7.20194e-23	2	go-blastocyst-development
go-nuclear-pore-organization	1.03452e-26	0.651885	1	0.997	9.56824e-23	2	go-nuclear-pore-organization
go-single-stranded-dna-binding	1.34273e-26	0.528211	1	1	1.24189e-22	2	go-single-stranded-dna-binding
go-regulation-of-dna-replication	1.60017e-26	0.840445	1	0.997	1.47999e-22	2	go-regulation-of-dna-replication
go-protein-localization-to-chromosome	2.08662e-26	0.703757	1	0.999	1.92991e-22	2	go-protein-localization-to-chromosome
go-chromosomal-region	2.09842e-26	0.780434	1	1	1.94083e-22	2	go-chromosomal-region
go-dna-geometric-change	2.4572e-26	0.508175	1	1	2.27266e-22	2	go-dna-geometric-change
go-regulation-of-cell-cycle-checkpoint	2.51236e-26	0.858594	1	0.98	2.32368e-22	2	go-regulation-of-cell-cycle-checkpoint
go-purine-nucleobase-biosynthetic-process	3.28745e-26	0.86216	1	0.967	3.04056e-22	2	go-purine-nucleobase-biosynthetic-process
go-chromosome-localization	3.78846e-26	0.831534	1	0.996	3.50395e-22	2	go-chromosome-localization
go-meiotic-cell-cycle	3.83411e-26	0.956047	1	0.512	3.54616e-22	2	go-meiotic-cell-cycle
go-maturation-of-ssu-rrna	4.06173e-26	0.867058	1	0.94	3.75669e-22	2	go-maturation-of-ssu-rrna
go-nuclear-exosome-rnase-complex-	6.06003e-26	0.621728	1	0.974	5.60492e-22	2	go-nuclear-exosome-rnase-complex-
go-dna-dependent-dna-replication-maintenance-of-fidelity	6.1061e-26	1.10895	1	0.818	5.64753e-22	2	go-dna-dependent-dna-replication-maintenance-of-fidelity
go-mitotic-cell-cycle	8.28927e-26	0.604412	1	1	7.66675e-22	2	go-mitotic-cell-cycle
go-ncrna-export-from-nucleus	8.61902e-26	0.459535	1	1	7.97173e-22	2	go-ncrna-export-from-nucleus
go-condensed-chromosome-centromeric-region	1.00731e-25	1.06295	1	0.997	9.31664e-22	2	go-condensed-chromosome-centromeric-region
go-cell-cycle-process	1.21016e-25	0.592276	1	1	1.11928e-21	2	go-cell-cycle-process
go-regulation-of-signal-transduction-by-p53-class-mediator	1.85461e-25	0.529746	1	1	1.71533e-21	2	go-regulation-of-signal-transduction-by-p53-class-mediator
go-ribosomal-small-subunit-biogenesis	2.20938e-25	0.902328	1	0.904	2.04346e-21	2	go-ribosomal-small-subunit-biogenesis
go-nucleoid	2.4048e-25	0.439188	1	1	2.2242e-21	2	go-nucleoid
go-spindle-microtubule	2.61235e-25	0.736207	1	1	2.41616e-21	2	go-spindle-microtubule
go-condensed-nuclear-chromosome-kinetochore	3.11876e-25	1.00542	1	0.666	2.88454e-21	2	go-condensed-nuclear-chromosome-kinetochore
go-trna-methylation	3.27844e-25	0.927031	1	0.937	3.03223e-21	2	go-trna-methylation
go-dna-replication-dependent-nucleosome-organization	4.00137e-25	0.594281	0.912	0.317	3.70086e-21	2	go-dna-replication-dependent-nucleosome-organization
go-exonuclease-activity	6.39716e-25	0.705455	1	0.994	5.91674e-21	2	go-exonuclease-activity
go-condensed-nuclear-chromosome-centromeric-region	6.49571e-25	0.896847	1	0.568	6.00788e-21	2	go-condensed-nuclear-chromosome-centromeric-region
go-rna-3-end-processing1	9.32586e-25	0.403	1	1	8.62549e-21	2	go-rna-3-end-processing
go-glycosyl-compound-biosynthetic-process	9.47732e-25	0.903396	1	0.981	8.76558e-21	2	go-glycosyl-compound-biosynthetic-process
go-mitotic-chromosome-condensation	1.46712e-24	1.00088	1	0.857	1.35694e-20	2	go-mitotic-chromosome-condensation
go-atp-dependent-dna-helicase-activity	1.48911e-24	0.530378	1	1	1.37727e-20	2	go-atp-dependent-dna-helicase-activity
go-chromosome-centromeric-region	1.50536e-24	0.823614	1	1	1.39231e-20	2	go-chromosome-centromeric-region
go-pyrimidine-ribonucleoside-triphosphate-biosynthetic-process	1.54975e-24	1.02236	1	0.875	1.43336e-20	2	go-pyrimidine-ribonucleoside-triphosphate-biosynthetic-process
go-dna-secondary-structure-binding	1.89628e-24	1.03347	1	0.93	1.75387e-20	2	go-dna-secondary-structure-binding
go-regulation-of-spindle-checkpoint	2.09899e-24	0.945795	1	0.954	1.94136e-20	2	go-regulation-of-spindle-checkpoint
go-regulation-of-nuclear-division	2.21182e-24	0.695897	1	1	2.04571e-20	2	go-regulation-of-nuclear-division
go-regulation-of-cell-cycle-phase-transition	2.248e-24	0.452905	1	1	2.07918e-20	2	go-regulation-of-cell-cycle-phase-transition
go-signal-transduction-by-p53-class-mediator	2.73077e-24	0.506506	1	1	2.52569e-20	2	go-signal-transduction-by-p53-class-mediator
go-spindle-organization	2.80548e-24	0.677904	1	1	2.59479e-20	2	go-spindle-organization
go-nuclear-chromosome-telomeric-region	3.24532e-24	0.491755	1	1	3.00159e-20	2	go-nuclear-chromosome-telomeric-region
go-four-way-junction-helicase-activity	3.46938e-24	0.283419	0.938	0.324	3.20883e-20	2	go-four-way-junction-helicase-activity
go-nuclease-activity	3.48067e-24	0.751792	1	0.99	3.21927e-20	2	go-nuclease-activity
go-regulation-of-chromosome-organization	3.61453e-24	0.385918	1	1	3.34308e-20	2	go-regulation-of-chromosome-organization
go-microtubule-cytoskeleton-organization	3.98224e-24	0.640568	1	1	3.68317e-20	2	go-microtubule-cytoskeleton-organization
go-tubulin-binding1	4.78076e-24	0.549544	1	1	4.42173e-20	2	go-tubulin-binding
go-kinetochore	5.18167e-24	0.835097	1	1	4.79253e-20	2	go-kinetochore
go-chromosome-condensation	5.76076e-24	0.969602	1	0.68	5.32813e-20	2	go-chromosome-condensation
go-chromosome-telomeric-region	5.76843e-24	0.508603	1	1	5.33522e-20	2	go-chromosome-telomeric-region
go-mitotic-dna-integrity-checkpoint	6.66617e-24	0.653883	1	1	6.16554e-20	2	go-mitotic-dna-integrity-checkpoint
go-histone-h4-acetylation	8.34491e-24	0.466386	1	0.999	7.71821e-20	2	go-histone-h4-acetylation
go-regulation-of-response-to-dna-damage-stimulus	8.75582e-24	0.504624	1	1	8.09826e-20	2	go-regulation-of-response-to-dna-damage-stimulus
go-mitochondrial-translation	1.21855e-23	0.407324	1	1	1.12703e-19	2	go-mitochondrial-translation
go-nucleolar-part	1.32682e-23	0.400914	1	1	1.22718e-19	2	go-nucleolar-part
go-chromatin	1.60651e-23	0.427321	1	1	1.48586e-19	2	go-chromatin
go-cytoplasmic-exosome-rnase-complex-	1.77648e-23	0.667475	1	0.981	1.64307e-19	2	go-cytoplasmic-exosome-rnase-complex-
go-regulation-of-mitotic-cell-cycle	1.82464e-23	0.453654	1	1	1.68761e-19	2	go-regulation-of-mitotic-cell-cycle
go-sister-chromatid-cohesion	1.92395e-23	0.794127	1	0.994	1.77946e-19	2	go-sister-chromatid-cohesion
go-transferase-activity-transferring-phosphorus-containing-groups	1.9861e-23	0.465718	1	1	1.83695e-19	2	go-transferase-activity-transferring-phosphorus-containing-groups
go-positive-regulation-of-cell-cycle-process	2.08306e-23	0.66985	1	0.999	1.92663e-19	2	go-positive-regulation-of-cell-cycle-process
go-microtubule-binding	3.58859e-23	0.687494	1	0.999	3.31909e-19	2	go-microtubule-binding
go-mitotic-spindle-organization	3.68433e-23	0.674415	1	1	3.40764e-19	2	go-mitotic-spindle-organization
go-condensed-chromosome	5.60934e-23	1.0111	1	0.996	5.18808e-19	2	go-condensed-chromosome
go-dna-double-strand-break-processing	6.25587e-23	0.861864	1	0.97	5.78606e-19	2	go-dna-double-strand-break-processing
go-spindle	9.02907e-23	0.620094	1	1	8.35099e-19	2	go-spindle
go-negative-regulation-of-mitotic-cell-cycle	9.9697e-23	0.395808	1	1	9.22097e-19	2	go-negative-regulation-of-mitotic-cell-cycle
go-replication-fork-processing	1.28268e-22	1.02637	1	0.76	1.18635e-18	2	go-replication-fork-processing
go-peptidyl-lysine-modification	1.32059e-22	0.332653	1	1	1.22142e-18	2	go-peptidyl-lysine-modification
go-purine-ntp-dependent-helicase-activity	1.61706e-22	0.404457	1	1	1.49562e-18	2	go-purine-ntp-dependent-helicase-activity
go-exonuclease-activity-active-with-either-ribo-or-deoxyribonucleic-acids-and-producing-5-phosphomonoesters	2.35983e-22	0.64078	1	0.999	2.18261e-18	2	go-exonuclease-activity-active-with-either-ribo-or-deoxyribonucleic-acids-and-producing-5-phosphomonoesters
go-rna-phosphodiester-bond-hydrolysis	2.47215e-22	0.516394	1	0.999	2.28649e-18	2	go-rna-phosphodiester-bond-hydrolysis
go-transferase-complex-transferring-phosphorus-containing-groups	2.58976e-22	0.382587	1	1	2.39527e-18	2	go-transferase-complex-transferring-phosphorus-containing-groups
go-cell-cycle	3.05457e-22	0.497172	1	1	2.82517e-18	2	go-cell-cycle
go-regulation-of-cell-cycle-process	3.16676e-22	0.436859	1	1	2.92894e-18	2	go-regulation-of-cell-cycle-process
go-atpase-activity	3.4211e-22	0.398955	1	1	3.16417e-18	2	go-atpase-activity
go-chromatin-remodeling1	4.07486e-22	0.469844	1	1	3.76884e-18	2	go-chromatin-remodeling
go-anaphase-promoting-complex-dependent-catabolic-process	4.24583e-22	0.25916	1	1	3.92697e-18	2	go-anaphase-promoting-complex-dependent-catabolic-process
go-spindle-pole	8.38697e-22	0.608792	1	1	7.75711e-18	2	go-spindle-pole
go-mitotic-dna-replication	9.26823e-22	0.918393	1	0.653	8.57219e-18	2	go-mitotic-dna-replication
go-pyrimidine-nucleotide-biosynthetic-process	1.06527e-21	0.715331	1	0.98	9.8527e-18	2	go-pyrimidine-nucleotide-biosynthetic-process
go-kinetochore-organization	1.33511e-21	0.930993	1	0.816	1.23484e-17	2	go-kinetochore-organization
go-structural-constituent-of-nuclear-pore	1.40891e-21	0.578522	1	0.987	1.3031e-17	2	go-structural-constituent-of-nuclear-pore
go-gemini-of-coiled-bodies	1.48304e-21	0.921822	1	0.948	1.37167e-17	2	go-gemini-of-coiled-bodies
go-microtubule-organizing-center-organization	2.6108e-21	0.617619	1	1	2.41473e-17	2	go-microtubule-organizing-center-organization
go-attachment-of-spindle-microtubules-to-kinetochore	2.6482e-21	0.939208	1	0.97	2.44932e-17	2	go-attachment-of-spindle-microtubules-to-kinetochore
go-u4-snrna-3-end-processing	2.89624e-21	0.687147	1	0.928	2.67874e-17	2	go-u4-snrna-3-end-processing
go-nucleoside-phosphate-biosynthetic-process	3.42587e-21	0.505875	1	0.997	3.16859e-17	2	go-nucleoside-phosphate-biosynthetic-process
go-dna-templated-transcription-termination	3.46047e-21	0.360928	1	1	3.20059e-17	2	go-dna-templated-transcription-termination
go-pyrimidine-containing-compound-biosynthetic-process	3.69726e-21	0.778799	1	0.95	3.4196e-17	2	go-pyrimidine-containing-compound-biosynthetic-process
go-trna-methyltransferase-activity	4.01614e-21	0.940903	1	0.879	3.71453e-17	2	go-trna-methyltransferase-activity
go-preribosome-small-subunit-precursor	4.40876e-21	0.985886	1	0.917	4.07766e-17	2	go-preribosome-small-subunit-precursor
go-ctf18-rfc-like-complex	4.47461e-21	0.722727	0.975	0.482	4.13857e-17	2	go-ctf18-rfc-like-complex
go-anaphase-promoting-complex	5.09063e-21	0.572881	1	1	4.70832e-17	2	go-anaphase-promoting-complex
go-negative-regulation-of-cell-cycle-phase-transition	5.43255e-21	0.339762	1	1	5.02457e-17	2	go-negative-regulation-of-cell-cycle-phase-transition
go-rna-interference	5.61659e-21	0.738796	1	0.963	5.19479e-17	2	go-rna-interference
go-ligase-activity-forming-carbon-nitrogen-bonds	6.5995e-21	0.775866	1	0.983	6.10388e-17	2	go-ligase-activity-forming-carbon-nitrogen-bonds
go-inner-cell-mass-cell-proliferation	7.97043e-21	1.0251	1	0.921	7.37185e-17	2	go-inner-cell-mass-cell-proliferation
go-smn-complex	9.44363e-21	0.722296	1	0.98	8.73441e-17	2	go-smn-complex
go-ligase-activity	9.44606e-21	0.41832	1	1	8.73666e-17	2	go-ligase-activity
go-histone-methylation1	1.04324e-20	0.440817	1	1	9.64889e-17	2	go-histone-methylation
go-protein-localization-to-chromosome-centromeric-region	1.13427e-20	0.962801	1	0.693	1.04909e-16	2	go-protein-localization-to-chromosome-centromeric-region
go-protein-methylation1	1.16352e-20	0.395351	1	0.999	1.07614e-16	2	go-protein-methylation
go-negative-regulation-of-organelle-organization	1.2348e-20	0.342812	1	1	1.14207e-16	2	go-negative-regulation-of-organelle-organization
go-microtubule-based-process	1.25329e-20	0.496262	1	1	1.15917e-16	2	go-microtubule-based-process
go-mitochondrial-rna-processing	1.41079e-20	0.803903	1	0.931	1.30484e-16	2	go-mitochondrial-rna-processing
go-mirna-binding1	1.63694e-20	0.617645	1	0.997	1.514e-16	2	go-mirna-binding
go-microtubule-organizing-center-part	1.67785e-20	0.654602	1	0.996	1.55184e-16	2	go-microtubule-organizing-center-part
go-microtubule-cytoskeleton	1.86102e-20	0.450722	1	1	1.72126e-16	2	go-microtubule-cytoskeleton
go-dna-modification	1.90741e-20	0.742851	1	0.99	1.76417e-16	2	go-dna-modification
go-endonucleolytic-cleavage-in-5-ets-of-tricistronic-rrna-transcript-ssu-rrna-5-8s-rrna-lsu-rrna-	2.24385e-20	0.604794	0.988	0.463	2.07534e-16	2	go-endonucleolytic-cleavage-in-5-ets-of-tricistronic-rrna-transcript-ssu-rrna-5-8s-rrna-lsu-rrna-
go-atpase-activity-coupled	2.31134e-20	0.335022	1	1	2.13776e-16	2	go-atpase-activity-coupled
go-ncrna-catabolic-process	2.39026e-20	0.738706	1	0.97	2.21075e-16	2	go-ncrna-catabolic-process
go-alpha-amino-acid-metabolic-process	3.08811e-20	0.664829	1	0.993	2.85619e-16	2	go-alpha-amino-acid-metabolic-process
go-mitochondrial-dna-repair	3.16126e-20	0.753743	0.988	0.552	2.92385e-16	2	go-mitochondrial-dna-repair
go-g2-dna-damage-checkpoint	4.71994e-20	0.903877	1	0.92	4.36547e-16	2	go-g2-dna-damage-checkpoint
go-microtubule-cytoskeleton-organization-involved-in-mitosis	5.01086e-20	0.592684	1	1	4.63454e-16	2	go-microtubule-cytoskeleton-organization-involved-in-mitosis
go-transcription-by-rna-polymerase-iii	6.42319e-20	0.490511	1	0.999	5.94081e-16	2	go-transcription-by-rna-polymerase-iii
go-protein-tetramerization	6.58102e-20	0.812466	1	0.99	6.08678e-16	2	go-protein-tetramerization
go-4-iron-4-sulfur-cluster-binding	7.1824e-20	0.594146	1	0.99	6.643e-16	2	go-4-iron-4-sulfur-cluster-binding
go-nuclear-pore-complex-assembly	7.82732e-20	0.688886	1	0.964	7.23949e-16	2	go-nuclear-pore-complex-assembly
go-nucleolus	8.26767e-20	0.504869	1	0.994	7.64676e-16	2	go-nucleolus
go-exosome-rnase-complex-	8.42932e-20	0.500077	1	0.99	7.79627e-16	2	go-exosome-rnase-complex-
go-amino-acid-activation	8.80529e-20	0.384969	1	1	8.14401e-16	2	go-amino-acid-activation
go-trna-binding	9.24219e-20	0.477241	1	0.997	8.5481e-16	2	go-trna-binding
go-mitochondrial-matrix	9.37739e-20	0.372402	1	1	8.67315e-16	2	go-mitochondrial-matrix
go-rna-export-from-nucleus	9.51455e-20	0.283975	1	1	8.80001e-16	2	go-rna-export-from-nucleus
go-interstrand-cross-link-repair	9.94769e-20	0.935719	1	0.864	9.20062e-16	2	go-interstrand-cross-link-repair
go-protein-dna-complex	1.01972e-19	1.02124	1	0.935	9.43137e-16	2	go-protein-dna-complex
go-regulation-of-cytokinesis	1.22915e-19	0.827148	1	0.99	1.13684e-15	2	go-regulation-of-cytokinesis
go-maturation-of-ssu-rrna-from-tricistronic-rrna-transcript-ssu-rrna-5-8s-rrna-lsu-rrna-	1.75782e-19	0.993232	1	0.844	1.62581e-15	2	go-maturation-of-ssu-rrna-from-tricistronic-rrna-transcript-ssu-rrna-5-8s-rrna-lsu-rrna-
go-regulation-of-dna-metabolic-process	1.96974e-19	0.377108	1	1	1.82182e-15	2	go-regulation-of-dna-metabolic-process
go-rna-polymerase-complex	2.13707e-19	0.391577	1	0.999	1.97658e-15	2	go-rna-polymerase-complex
go-mrna-transport	2.58821e-19	0.26707	1	1	2.39383e-15	2	go-mrna-transport
go-negative-regulation-of-cell-cycle-process	3.07396e-19	0.336891	1	1	2.84311e-15	2	go-negative-regulation-of-cell-cycle-process
go-mitotic-g2-m-transition-checkpoint	3.18752e-19	0.91698	1	0.96	2.94814e-15	2	go-mitotic-g2-m-transition-checkpoint
go-spindle-assembly	3.49641e-19	0.5381	1	1	3.23383e-15	2	go-spindle-assembly
go-rna-dna-hybrid-ribonuclease-activity	3.49684e-19	0.826376	1	0.611	3.23423e-15	2	go-rna-dna-hybrid-ribonuclease-activity
go-lagging-strand-elongation	3.76769e-19	0.564831	0.938	0.413	3.48473e-15	2	go-lagging-strand-elongation
go-nucleobase-containing-compound-kinase-activity	4.39366e-19	0.538022	1	0.994	4.06369e-15	2	go-nucleobase-containing-compound-kinase-activity
go-ncrna-transcription	5.23737e-19	0.351133	1	1	4.84404e-15	2	go-ncrna-transcription
go-positive-regulation-of-gene-expression-epigenetic	5.62332e-19	0.390139	1	1	5.20101e-15	2	go-positive-regulation-of-gene-expression-epigenetic
go-pseudouridine-synthesis	8.49042e-19	0.922742	1	0.923	7.85279e-15	2	go-pseudouridine-synthesis
go-ligase-activity-forming-carbon-oxygen-bonds	1.1411e-18	0.38026	1	1	1.0554e-14	2	go-ligase-activity-forming-carbon-oxygen-bonds
go-intercellular-bridge	1.19774e-18	0.864794	1	0.908	1.10779e-14	2	go-intercellular-bridge
go-dna-packaging-complex	1.21591e-18	0.464868	0.787	0.27	1.1246e-14	2	go-dna-packaging-complex
go-carbon-oxygen-lyase-activity	2.38853e-18	0.782735	1	0.987	2.20915e-14	2	go-carbon-oxygen-lyase-activity
go-rna-phosphodiester-bond-hydrolysis-endonucleolytic	2.44339e-18	0.857943	1	0.943	2.25989e-14	2	go-rna-phosphodiester-bond-hydrolysis-endonucleolytic
go-purine-nucleoside-monophosphate-biosynthetic-process	2.9854e-18	0.611132	1	0.986	2.76119e-14	2	go-purine-nucleoside-monophosphate-biosynthetic-process
go-g-quadruplex-dna-binding	3.0261e-18	0.99817	1	0.92	2.79884e-14	2	go-g-quadruplex-dna-binding
go-positive-regulation-of-mitotic-cell-cycle	3.44716e-18	0.454999	1	1	3.18828e-14	2	go-positive-regulation-of-mitotic-cell-cycle
go-nucleotide-excision-repair	3.85222e-18	0.317778	1	1	3.56292e-14	2	go-nucleotide-excision-repair
go-centrosome	4.42515e-18	0.435706	1	1	4.09282e-14	2	go-centrosome
go-positive-regulation-of-histone-methylation1	5.03539e-18	0.44791	1	1	4.65723e-14	2	go-positive-regulation-of-histone-methylation
go-regulation-of-double-strand-break-repair-via-homologous-recombination	5.15924e-18	0.912185	1	0.851	4.77178e-14	2	go-regulation-of-double-strand-break-repair-via-homologous-recombination
go-ribose-phosphate-biosynthetic-process	5.39574e-18	0.444822	1	0.999	4.99052e-14	2	go-ribose-phosphate-biosynthetic-process
go-alpha-amino-acid-biosynthetic-process	5.62405e-18	0.486013	1	0.997	5.20169e-14	2	go-alpha-amino-acid-biosynthetic-process
go-pyrimidine-ribonucleotide-biosynthetic-process	6.05174e-18	0.891414	1	0.92	5.59725e-14	2	go-pyrimidine-ribonucleotide-biosynthetic-process
go-dna-replication-factor-c-complex	6.26074e-18	0.760442	1	0.686	5.79056e-14	2	go-dna-replication-factor-c-complex
go-dna-polymerase-binding	6.94842e-18	0.689679	1	0.993	6.42659e-14	2	go-dna-polymerase-binding
go-regulation-of-mitochondrial-translation	7.14175e-18	0.52898	1	0.984	6.60541e-14	2	go-regulation-of-mitochondrial-translation
go-negative-regulation-of-intrinsic-apoptotic-signaling-pathway-in-response-to-dna-damage	8.65862e-18	0.784018	1	0.991	8.00836e-14	2	go-negative-regulation-of-intrinsic-apoptotic-signaling-pathway-in-response-to-dna-damage
go-dna-damage-response-detection-of-dna-damage	1.15471e-17	0.387449	1	1	1.06799e-13	2	go-dna-damage-response-detection-of-dna-damage
go-chromatin-organization-involved-in-regulation-of-transcription1	1.16529e-17	0.648627	1	0.997	1.07777e-13	2	go-chromatin-organization-involved-in-regulation-of-transcription
go-negative-regulation-of-dna-metabolic-process1	1.2308e-17	0.527097	1	0.999	1.13837e-13	2	go-negative-regulation-of-dna-metabolic-process
go-meiotic-cell-cycle-process	1.40249e-17	0.629204	1	0.462	1.29716e-13	2	go-meiotic-cell-cycle-process
go-mitotic-spindle-assembly	1.49005e-17	0.518507	1	1	1.37815e-13	2	go-mitotic-spindle-assembly
go-positive-regulation-of-cell-cycle	1.6921e-17	0.461547	1	1	1.56502e-13	2	go-positive-regulation-of-cell-cycle
go-coenzyme-biosynthetic-process	1.73878e-17	0.505136	1	0.993	1.6082e-13	2	go-coenzyme-biosynthetic-process
go-microtubule-organizing-center	1.81123e-17	0.439037	1	1	1.6752e-13	2	go-microtubule-organizing-center
go-protein-localization-to-kinetochore	2.15452e-17	0.808134	0.988	0.607	1.99271e-13	2	go-protein-localization-to-kinetochore
go-regulation-of-dna-repair	2.54276e-17	0.622066	1	0.996	2.3518e-13	2	go-regulation-of-dna-repair
go-condensin-complex	2.69781e-17	0.789781	1	0.611	2.49521e-13	2	go-condensin-complex
go-mitotic-spindle	2.70854e-17	0.575597	1	1	2.50513e-13	2	go-mitotic-spindle
go-intramolecular-transferase-activity	2.9242e-17	0.6399	1	0.994	2.7046e-13	2	go-intramolecular-transferase-activity
go-microtubule-associated-complex1	3.07271e-17	0.656602	1	0.999	2.84195e-13	2	go-microtubule-associated-complex
go-signal-transduction-involved-in-cell-cycle-checkpoint	3.34692e-17	0.573172	1	0.996	3.09557e-13	2	go-signal-transduction-involved-in-cell-cycle-checkpoint
go-condensed-nuclear-chromosome	3.46757e-17	0.76198	1	0.581	3.20716e-13	2	go-condensed-nuclear-chromosome
go-cyclin-dependent-protein-kinase-holoenzyme-complex	3.48511e-17	0.543516	1	0.997	3.22337e-13	2	go-cyclin-dependent-protein-kinase-holoenzyme-complex
go-mrna-export-from-nucleus	3.5008e-17	0.28157	1	1	3.23789e-13	2	go-mrna-export-from-nucleus
go-cellular-amino-acid-metabolic-process	3.72802e-17	0.270628	1	1	3.44805e-13	2	go-cellular-amino-acid-metabolic-process
go-cytoskeletal-part	3.81265e-17	0.407545	1	1	3.52632e-13	2	go-cytoskeletal-part
go-nadph-binding	4.1765e-17	0.856118	1	0.914	3.86285e-13	2	go-nadph-binding
go-methyltransferase-complex1	4.98853e-17	0.307232	1	1	4.61389e-13	2	go-methyltransferase-complex
go-blastocyst-growth	5.38037e-17	0.852223	1	0.976	4.9763e-13	2	go-blastocyst-growth
go-regulation-of-microtubule-based-process	6.57904e-17	0.427967	1	1	6.08495e-13	2	go-regulation-of-microtubule-based-process
go-protein-acylation	7.19177e-17	0.305888	1	1	6.65167e-13	2	go-protein-acylation
go-translational-termination	7.72219e-17	0.319573	1	1	7.14226e-13	2	go-translational-termination
go-pigment-biosynthetic-process1	8.90108e-17	0.543258	1	0.989	8.23261e-13	2	go-pigment-biosynthetic-process
go-regulation-of-dna-recombination	1.04043e-16	0.82955	1	0.921	9.62294e-13	2	go-regulation-of-dna-recombination
go-positive-regulation-of-mitochondrial-translation	1.30641e-16	0.587501	1	0.963	1.2083e-12	2	go-positive-regulation-of-mitochondrial-translation
go-dna-protection	1.37789e-16	0.690349	1	0.597	1.27441e-12	2	go-dna-protection
go-response-to-ionizing-radiation	1.54662e-16	0.408143	1	1	1.43047e-12	2	go-response-to-ionizing-radiation
go-g0-to-g1-transition1	1.81191e-16	0.645683	1	0.994	1.67583e-12	2	go-g0-to-g1-transition
go-positive-regulation-of-chromosome-segregation	2.23652e-16	0.500767	1	1	2.06856e-12	2	go-positive-regulation-of-chromosome-segregation
go-chromatin-binding	2.43047e-16	0.302233	1	1	2.24794e-12	2	go-chromatin-binding
go-centrosome-duplication	3.3424e-16	0.6539	1	0.999	3.09139e-12	2	go-centrosome-duplication
go-glutamine-metabolic-process	4.11689e-16	0.797463	1	0.977	3.80771e-12	2	go-glutamine-metabolic-process
go-centriole	6.48391e-16	0.684087	1	0.974	5.99697e-12	2	go-centriole
go-endopeptidase-activator-activity	7.00701e-16	0.961812	1	0.974	6.48078e-12	2	go-endopeptidase-activator-activity
go-four-way-junction-dna-binding	7.61171e-16	0.873206	1	0.92	7.04008e-12	2	go-four-way-junction-dna-binding
go-mitotic-cytokinesis	7.7728e-16	0.40719	1	1	7.18906e-12	2	go-mitotic-cytokinesis
go-g-quadruplex-dna-unwinding	8.00958e-16	0.820795	1	0.918	7.40806e-12	2	go-g-quadruplex-dna-unwinding
go-nuclear-chromatin	8.21962e-16	0.344038	1	1	7.60233e-12	2	go-nuclear-chromatin
go-regulation-of-sister-chromatid-cohesion	9.80119e-16	0.608836	1	0.999	9.06512e-12	2	go-regulation-of-sister-chromatid-cohesion
go-protein-localization-to-cytoskeleton	1.56129e-15	0.579565	1	0.99	1.44404e-11	2	go-protein-localization-to-cytoskeleton
go-negative-regulation-of-gene-expression-epigenetic1	1.67844e-15	0.52049	1	0.999	1.55239e-11	2	go-negative-regulation-of-gene-expression-epigenetic
go-regulation-of-ubiquitin-protein-transferase-activity	2.06651e-15	0.589872	1	0.989	1.91132e-11	2	go-regulation-of-ubiquitin-protein-transferase-activity
go-negative-regulation-of-dna-dependent-dna-replication	2.19461e-15	0.756476	1	0.947	2.02979e-11	2	go-negative-regulation-of-dna-dependent-dna-replication
go-histone-h4-k16-acetylation	2.52138e-15	0.522319	1	0.991	2.33203e-11	2	go-histone-h4-k16-acetylation
go-protein-containing-complex-localization	2.5644e-15	0.258195	1	1	2.37181e-11	2	go-protein-containing-complex-localization
go-site-of-double-strand-break	2.94762e-15	0.577747	1	0.996	2.72625e-11	2	go-site-of-double-strand-break
go-de-novo-imp-biosynthetic-process	3.02484e-15	0.655371	1	0.867	2.79768e-11	2	go-de-novo-imp-biosynthetic-process
go-rrna-catabolic-process	3.3543e-15	0.676387	1	0.961	3.10239e-11	2	go-rrna-catabolic-process
go-histone-methyltransferase-complex1	3.69975e-15	0.341318	1	0.999	3.4219e-11	2	go-histone-methyltransferase-complex
go-cytoskeleton-dependent-cytokinesis	6.95561e-15	0.343879	1	1	6.43325e-11	2	go-cytoskeleton-dependent-cytokinesis
go-dna-synthesis-involved-in-dna-repair	7.71715e-15	0.687618	1	0.99	7.13759e-11	2	go-dna-synthesis-involved-in-dna-repair
go-cytokinesis	7.94492e-15	0.333847	1	1	7.34826e-11	2	go-cytokinesis
go-regulation-of-centrosome-cycle	9.03491e-15	0.525551	1	1	8.35639e-11	2	go-regulation-of-centrosome-cycle
go-origin-recognition-complex	9.64861e-15	0.89161	0.988	0.785	8.924e-11	2	go-origin-recognition-complex
go-pyrimidine-nucleoside-monophosphate-biosynthetic-process	9.91245e-15	0.831401	1	0.921	9.16803e-11	2	go-pyrimidine-nucleoside-monophosphate-biosynthetic-process
go-organelle-assembly	1.44634e-14	0.327324	1	1	1.33772e-10	2	go-organelle-assembly
go-nuclear-pore-nuclear-basket	1.50944e-14	0.712909	1	0.951	1.39608e-10	2	go-nuclear-pore-nuclear-basket
go-regulation-of-double-strand-break-repair	1.68373e-14	0.886706	1	0.943	1.55728e-10	2	go-regulation-of-double-strand-break-repair
go-nucleotide-excision-repair-dna-gap-filling	1.78982e-14	0.697689	1	0.974	1.65541e-10	2	go-nucleotide-excision-repair-dna-gap-filling
go-nuclear-pore-central-transport-channel	2.04127e-14	0.804259	1	0.855	1.88797e-10	2	go-nuclear-pore-central-transport-channel
go-nucleoside-phosphate-catabolic-process	2.37315e-14	0.690494	1	0.974	2.19492e-10	2	go-nucleoside-phosphate-catabolic-process
go-cellular-metabolic-compound-salvage	2.387e-14	0.843443	1	0.95	2.20774e-10	2	go-cellular-metabolic-compound-salvage
go-nuclear-periphery	2.82844e-14	0.255724	1	1	2.61603e-10	2	go-nuclear-periphery
go-histone-h3-acetylation	3.01438e-14	0.6143	1	0.96	2.788e-10	2	go-histone-h3-acetylation
go-cofactor-biosynthetic-process	3.04315e-14	0.405374	1	1	2.81461e-10	2	go-cofactor-biosynthetic-process
go-protein-acetylation	3.65254e-14	0.271821	1	1	3.37823e-10	2	go-protein-acetylation
go-regulation-of-cell-cycle	3.92859e-14	0.275528	1	1	3.63355e-10	2	go-regulation-of-cell-cycle
go-dna-n-glycosylase-activity	4.70395e-14	0.838607	1	0.923	4.35068e-10	2	go-dna-n-glycosylase-activity
go-transcription-by-rna-polymerase-i	4.8661e-14	0.321678	1	1	4.50065e-10	2	go-transcription-by-rna-polymerase-i
go-rna-metabolic-process1	4.94518e-14	0.303566	1	1	4.57379e-10	2	go-rna-metabolic-process
go-rna-polyadenylation	5.95059e-14	0.30727	1	1	5.5037e-10	2	go-rna-polyadenylation
go-polyadenylation-dependent-snorna-3-end-processing	6.78652e-14	0.747433	1	0.805	6.27686e-10	2	go-polyadenylation-dependent-snorna-3-end-processing
go-regulatory-rna-binding	6.79308e-14	0.466826	1	0.994	6.28292e-10	2	go-regulatory-rna-binding
go-deoxyribose-phosphate-catabolic-process	7.14518e-14	0.814501	1	0.923	6.60858e-10	2	go-deoxyribose-phosphate-catabolic-process
go-microtubule	7.21383e-14	0.33083	1	1	6.67207e-10	2	go-microtubule
go-contractile-ring	7.93954e-14	0.867679	1	0.871	7.34328e-10	2	go-contractile-ring
go-peptidyl-lysine-methylation1	8.06882e-14	0.393888	1	0.999	7.46285e-10	2	go-peptidyl-lysine-methylation
go-transcription-initiation-from-rna-polymerase-i-promoter	8.49891e-14	0.358917	1	1	7.86065e-10	2	go-transcription-initiation-from-rna-polymerase-i-promoter
go-mrna-cleavage-factor-complex	1.0169e-13	0.508389	1	0.996	9.4053e-10	2	go-mrna-cleavage-factor-complex
go-mitochondrial-translational-termination	1.07944e-13	0.299656	1	1	9.98371e-10	2	go-mitochondrial-translational-termination
go-mll1-2-complex	1.11875e-13	0.416976	1	0.994	1.03473e-09	2	go-mll1-2-complex
go-production-of-sirna-involved-in-rna-interference	1.13776e-13	0.827784	1	0.91	1.05231e-09	2	go-production-of-sirna-involved-in-rna-interference
go-nucleobase-containing-small-molecule-interconversion	1.26527e-13	0.426869	1	0.997	1.17025e-09	2	go-nucleobase-containing-small-molecule-interconversion
go-3-5-exonuclease-activity	2.12221e-13	0.489928	1	0.996	1.96284e-09	2	go-3-5-exonuclease-activity
go-mediator-complex	2.41573e-13	0.478574	1	0.994	2.23431e-09	2	go-mediator-complex
go-protein-acetyltransferase-complex	2.48295e-13	0.291862	1	1	2.29648e-09	2	go-protein-acetyltransferase-complex
go-regulation-of-dna-duplex-unwinding	2.58212e-13	0.622371	0.988	0.581	2.3882e-09	2	go-regulation-of-dna-duplex-unwinding
go-mitochondrial-trna-processing	2.94066e-13	0.744888	1	0.879	2.71982e-09	2	go-mitochondrial-trna-processing
go-dna-biosynthetic-process	3.0431e-13	0.263964	1	1	2.81457e-09	2	go-dna-biosynthetic-process
go-kinetochore-binding	3.14481e-13	0.482863	0.988	0.512	2.90864e-09	2	go-kinetochore-binding
go-deoxyribonucleotide-biosynthetic-process	3.14598e-13	0.672789	1	0.954	2.90972e-09	2	go-deoxyribonucleotide-biosynthetic-process
go-termination-of-rna-polymerase-i-transcription	3.18904e-13	0.371999	1	0.999	2.94954e-09	2	go-termination-of-rna-polymerase-i-transcription
go-snrna-transcription	3.698e-13	0.271158	1	0.999	3.42028e-09	2	go-snrna-transcription
go-site-of-dna-damage	4.02827e-13	0.405238	1	0.996	3.72575e-09	2	go-site-of-dna-damage
go-nuclear-polyadenylation-dependent-trna-catabolic-process	4.89829e-13	0.62274	1	0.766	4.53043e-09	2	go-nuclear-polyadenylation-dependent-trna-catabolic-process
go-telomere-capping	5.24143e-13	0.808443	1	0.974	4.8478e-09	2	go-telomere-capping
go-histone-h3-k4-methylation1	5.70834e-13	0.421458	1	0.994	5.27964e-09	2	go-histone-h3-k4-methylation
go-metal-cluster-binding	7.61975e-13	0.441671	1	0.999	7.04751e-09	2	go-metal-cluster-binding
go-trna-threonylcarbamoyladenosine-metabolic-process	1.27194e-12	0.682605	1	0.915	1.17642e-08	2	go-trna-threonylcarbamoyladenosine-metabolic-process
go-mitotic-spindle-midzone	1.30109e-12	0.812901	1	0.793	1.20337e-08	2	go-mitotic-spindle-midzone
go-regulation-of-histone-h4-acetylation	1.40335e-12	0.80146	1	0.974	1.29796e-08	2	go-regulation-of-histone-h4-acetylation
go-endonuclease-activity	1.46928e-12	0.714391	1	0.941	1.35894e-08	2	go-endonuclease-activity
go-ribonuclease-activity	1.4748e-12	0.433792	1	0.997	1.36404e-08	2	go-ribonuclease-activity
go-rna-surveillance	1.67705e-12	0.478725	1	0.974	1.5511e-08	2	go-rna-surveillance
go-nuclear-pore	1.76213e-12	0.276849	1	1	1.62979e-08	2	go-nuclear-pore
go-nuclear-ubiquitin-ligase-complex	1.78898e-12	0.400018	1	0.997	1.65463e-08	2	go-nuclear-ubiquitin-ligase-complex
go-attachment-of-mitotic-spindle-microtubules-to-kinetochore	1.94506e-12	0.851327	1	0.865	1.79899e-08	2	go-attachment-of-mitotic-spindle-microtubules-to-kinetochore
go-postreplication-repair	2.1604e-12	0.323581	1	1	1.99815e-08	2	go-postreplication-repair
go-midbody	2.1604e-12	0.314618	1	1	1.99815e-08	2	go-midbody
go-heterochromatin	2.20146e-12	0.326421	1	1	2.03613e-08	2	go-heterochromatin
go-mitochondrial-ribosome-assembly	2.24067e-12	0.80479	1	0.755	2.07239e-08	2	go-mitochondrial-ribosome-assembly
go-organellar-ribosome	2.29451e-12	0.28092	1	1	2.12219e-08	2	go-organellar-ribosome
go-nucleosomal-dna-binding	2.38244e-12	0.531254	1	1	2.20351e-08	2	go-nucleosomal-dna-binding
go-regulation-of-spindle-organization	2.38244e-12	0.345124	1	1	2.20351e-08	2	go-regulation-of-spindle-organization
go-regulation-of-intrinsic-apoptotic-signaling-pathway-in-response-to-dna-damage	2.47365e-12	0.699028	1	0.993	2.28788e-08	2	go-regulation-of-intrinsic-apoptotic-signaling-pathway-in-response-to-dna-damage
go-nuclear-transcribed-mrna-catabolic-process-exonucleolytic	2.84198e-12	0.288976	1	1	2.62855e-08	2	go-nuclear-transcribed-mrna-catabolic-process-exonucleolytic
go-nucleosome-binding	3.12076e-12	0.335007	1	1	2.88639e-08	2	go-nucleosome-binding
go-peptidyl-lysine-acetylation	3.5832e-12	0.251099	1	1	3.3141e-08	2	go-peptidyl-lysine-acetylation
go-intrinsic-component-of-mitochondrial-membrane	4.39721e-12	0.284976	1	1	4.06698e-08	2	go-intrinsic-component-of-mitochondrial-membrane
go-negative-regulation-of-dna-replication	4.59658e-12	0.614276	1	0.977	4.25138e-08	2	go-negative-regulation-of-dna-replication
go-positive-regulation-of-transcription-by-rna-polymerase-i	4.70098e-12	0.451369	1	0.99	4.34794e-08	2	go-positive-regulation-of-transcription-by-rna-polymerase-i
go-rrna-transcription	5.39169e-12	0.448642	1	0.994	4.98678e-08	2	go-rrna-transcription
go-epsilon-dna-polymerase-complex	5.45135e-12	0.452786	0.95	0.509	5.04196e-08	2	go-epsilon-dna-polymerase-complex
go-aspartate-family-amino-acid-metabolic-process	5.89012e-12	0.61707	1	0.974	5.44777e-08	2	go-aspartate-family-amino-acid-metabolic-process
go-retrograde-neuronal-dense-core-vesicle-transport	6.16015e-12	0.412597	1	0.472	5.69752e-08	2	go-retrograde-neuronal-dense-core-vesicle-transport
go-dna-polymerase-activity	7.01116e-12	0.691365	1	0.944	6.48462e-08	2	go-dna-polymerase-activity
go-histone-binding	7.21592e-12	0.273002	1	1	6.674e-08	2	go-histone-binding
go-acetyltransferase-activity	8.08641e-12	0.287589	1	0.999	7.47912e-08	2	go-acetyltransferase-activity
go-exonucleolytic-trimming-involved-in-rrna-processing	8.58874e-12	0.588935	1	0.888	7.94373e-08	2	go-exonucleolytic-trimming-involved-in-rrna-processing
go-response-to-indole-3-methanol1	9.26981e-12	0.639246	1	0.752	8.57365e-08	2	go-response-to-indole-3-methanol
go-snorna-binding	9.74732e-12	0.308581	1	0.999	9.0153e-08	2	go-snorna-binding
go-purine-containing-compound-biosynthetic-process	1.03341e-11	0.46069	1	0.997	9.55805e-08	2	go-purine-containing-compound-biosynthetic-process
go-kinetochore-assembly	1.19201e-11	0.703158	1	0.846	1.10249e-07	2	go-kinetochore-assembly
go-kinase-activity	1.30476e-11	0.348232	1	0.999	1.20677e-07	2	go-kinase-activity
go-g1-dna-damage-checkpoint	1.46547e-11	0.433393	1	0.999	1.35541e-07	2	go-g1-dna-damage-checkpoint
go-rrna-modification	1.51355e-11	0.643616	1	0.973	1.39988e-07	2	go-rrna-modification
go-intrinsic-component-of-mitochondrial-inner-membrane	1.99247e-11	0.299081	1	1	1.84283e-07	2	go-intrinsic-component-of-mitochondrial-inner-membrane
go-euchromatin	2.01411e-11	0.567626	1	0.994	1.86285e-07	2	go-euchromatin
go-nuclear-ncrna-surveillance	2.24967e-11	0.576044	1	0.851	2.08072e-07	2	go-nuclear-ncrna-surveillance
go-negative-regulation-of-histone-methylation	2.26753e-11	0.676374	1	0.977	2.09724e-07	2	go-negative-regulation-of-histone-methylation
go-termination-of-rna-polymerase-ii-transcription	2.63675e-11	0.263394	1	1	2.43873e-07	2	go-termination-of-rna-polymerase-ii-transcription
go-postsynaptic-cytosol	2.80212e-11	0.632371	1	0.99	2.59168e-07	2	go-postsynaptic-cytosol
go-protein-k11-linked-ubiquitination	4.5949e-11	0.252734	1	0.999	4.24983e-07	2	go-protein-k11-linked-ubiquitination
go-regulation-of-histone-methylation1	6.09343e-11	0.299157	1	1	5.63581e-07	2	go-regulation-of-histone-methylation
go-rna-polymerase-i-activity	6.77034e-11	0.465861	1	0.984	6.26188e-07	2	go-rna-polymerase-i-activity
go-pre-mirna-processing	7.34647e-11	0.772279	1	0.898	6.79475e-07	2	go-pre-mirna-processing
go-f-actin-capping-protein-complex1	8.01041e-11	0.628257	1	0.993	7.40883e-07	2	go-f-actin-capping-protein-complex
go-mitotic-sister-chromatid-cohesion	1.10753e-10	0.502286	1	0.99	1.02436e-06	2	go-mitotic-sister-chromatid-cohesion
go-response-to-uv	1.1114e-10	0.324835	1	1	1.02793e-06	2	go-response-to-uv
go-rna-polymerase-iii-complex	1.13866e-10	0.467716	1	0.984	1.05314e-06	2	go-rna-polymerase-iii-complex
go-negative-regulation-of-chromatin-organization1	1.13872e-10	0.387952	1	1	1.05321e-06	2	go-negative-regulation-of-chromatin-organization
go-magnesium-ion-binding	1.16671e-10	0.343511	1	1	1.07909e-06	2	go-magnesium-ion-binding
go-cytochrome-complex-assembly	1.19536e-10	0.261913	1	1	1.10559e-06	2	go-cytochrome-complex-assembly
go-pronucleus	1.23197e-10	0.779394	1	0.824	1.13945e-06	2	go-pronucleus
go-replisome	1.36685e-10	0.797842	1	0.91	1.2642e-06	2	go-replisome
go-cellular-amino-acid-biosynthetic-process	1.80198e-10	0.4248	1	0.996	1.66665e-06	2	go-cellular-amino-acid-biosynthetic-process
go-pore-complex-assembly	1.94322e-10	0.403693	1	1	1.79728e-06	2	go-pore-complex-assembly
go-regulation-of-cell-cycle-arrest	2.22064e-10	0.540535	1	0.997	2.05387e-06	2	go-regulation-of-cell-cycle-arrest
go-histone-h4-k5-acetylation	2.24197e-10	0.631753	1	0.964	2.0736e-06	2	go-histone-h4-k5-acetylation
go-organellar-large-ribosomal-subunit	2.402e-10	0.265269	1	1	2.22161e-06	2	go-organellar-large-ribosomal-subunit
go-h4-histone-acetyltransferase-complex	2.55395e-10	0.305426	1	0.999	2.36215e-06	2	go-h4-histone-acetyltransferase-complex
go-regulation-of-centrosome-duplication	2.79963e-10	0.47365	1	0.997	2.58938e-06	2	go-regulation-of-centrosome-duplication
go-positive-regulation-of-cytoplasmic-translation1	3.88772e-10	0.456495	1	0.996	3.59576e-06	2	go-positive-regulation-of-cytoplasmic-translation
go-endonucleolytic-cleavage-involved-in-rrna-processing	3.89994e-10	0.487263	0.988	0.544	3.60706e-06	2	go-endonucleolytic-cleavage-involved-in-rrna-processing
go-regulation-of-attachment-of-spindle-microtubules-to-kinetochore	4.82131e-10	0.5787	1	0.989	4.45923e-06	2	go-regulation-of-attachment-of-spindle-microtubules-to-kinetochore
go-intrinsic-apoptotic-signaling-pathway-in-response-to-dna-damage-by-p53-class-mediator	5.05311e-10	0.396011	1	0.999	4.67362e-06	2	go-intrinsic-apoptotic-signaling-pathway-in-response-to-dna-damage-by-p53-class-mediator
go-respiratory-chain-complex-iv-assembly	5.26033e-10	0.265672	1	0.999	4.86528e-06	2	go-respiratory-chain-complex-iv-assembly
go-regulation-of-translational-fidelity	6.36884e-10	0.794862	1	0.944	5.89054e-06	2	go-regulation-of-translational-fidelity
go-cytokinetic-process	7.0315e-10	0.382414	1	1	6.50344e-06	2	go-cytokinetic-process
go-transcription-elongation-from-rna-polymerase-i-promoter	7.1256e-10	0.340258	1	0.997	6.59047e-06	2	go-transcription-elongation-from-rna-polymerase-i-promoter
go-nuclear-transcribed-mrna-catabolic-process-exonucleolytic-3-5-	7.15549e-10	0.555691	1	0.944	6.61811e-06	2	go-nuclear-transcribed-mrna-catabolic-process-exonucleolytic-3-5-
go-carbon-nitrogen-ligase-activity-with-glutamine-as-amido-n-donor	7.40567e-10	0.809355	0.988	0.862	6.84951e-06	2	go-carbon-nitrogen-ligase-activity-with-glutamine-as-amido-n-donor
go-lyase-activity	8.21687e-10	0.487937	1	0.978	7.59979e-06	2	go-lyase-activity
go-rna-polymerase-i-complex	8.30002e-10	0.37988	1	0.994	7.67669e-06	2	go-rna-polymerase-i-complex
go-coenzyme-metabolic-process	8.49453e-10	0.311813	1	0.993	7.85659e-06	2	go-coenzyme-metabolic-process
go-positive-regulation-of-ribosome-biogenesis	1.22718e-09	0.544195	1	0.958	1.13502e-05	2	go-positive-regulation-of-ribosome-biogenesis
go-regulation-of-helicase-activity	1.36369e-09	0.654844	1	0.973	1.26128e-05	2	go-regulation-of-helicase-activity
go-purine-deoxyribonucleoside-triphosphate-catabolic-process	1.36645e-09	0.340125	0.95	0.482	1.26383e-05	2	go-purine-deoxyribonucleoside-triphosphate-catabolic-process
go-positive-regulation-of-histone-h3-k4-methylation1	1.38655e-09	0.420618	1	0.997	1.28242e-05	2	go-positive-regulation-of-histone-h3-k4-methylation
go-cellular-response-to-uv	1.40939e-09	0.311626	1	1	1.30354e-05	2	go-cellular-response-to-uv
go-histone-h3-k9-methylation	1.49954e-09	0.552349	1	0.989	1.38692e-05	2	go-histone-h3-k9-methylation
go-meiotic-chromosome-condensation	1.5655e-09	0.421463	1	0.547	1.44793e-05	2	go-meiotic-chromosome-condensation
go-anatomical-structure-homeostasis	1.78189e-09	0.279788	1	1	1.64807e-05	2	go-anatomical-structure-homeostasis
go-thioester-biosynthetic-process	2.38409e-09	0.464557	1	0.986	2.20505e-05	2	go-thioester-biosynthetic-process
go-regulation-of-translational-elongation	2.7378e-09	0.652477	1	0.984	2.53219e-05	2	go-regulation-of-translational-elongation
go-sam-complex	3.13493e-09	0.562344	1	0.719	2.8995e-05	2	go-sam-complex
go-kinesin-complex	3.2871e-09	0.518715	1	0.578	3.04024e-05	2	go-kinesin-complex
go-pseudouridine-synthase-activity	3.71664e-09	0.737286	1	0.746	3.43752e-05	2	go-pseudouridine-synthase-activity
go-mitotic-dna-replication-checkpoint	4.40927e-09	0.730313	1	0.716	4.07813e-05	2	go-mitotic-dna-replication-checkpoint
go-intrinsic-apoptotic-signaling-pathway-by-p53-class-mediator	4.47539e-09	0.370936	1	1	4.13929e-05	2	go-intrinsic-apoptotic-signaling-pathway-by-p53-class-mediator
go-mismatched-dna-binding	4.5946e-09	0.57808	1	0.944	4.24955e-05	2	go-mismatched-dna-binding
go-serine-family-amino-acid-metabolic-process	4.65973e-09	0.750582	1	0.907	4.30978e-05	2	go-serine-family-amino-acid-metabolic-process
go-regulation-of-mrna-3-end-processing	4.81354e-09	0.26073	1	1	4.45205e-05	2	go-regulation-of-mrna-3-end-processing
go-h4-histone-acetyltransferase-activity	4.84406e-09	0.378772	1	0.991	4.48027e-05	2	go-h4-histone-acetyltransferase-activity
go-ciliary-basal-body-plasma-membrane-docking	4.9213e-09	0.312018	1	1	4.55171e-05	2	go-ciliary-basal-body-plasma-membrane-docking
go-protein-serine-threonine-phosphatase-activity	4.9997e-09	0.395637	1	0.994	4.62422e-05	2	go-protein-serine-threonine-phosphatase-activity
go-nucleobase-containing-small-molecule-metabolic-process	5.27549e-09	0.259175	1	0.997	4.8793e-05	2	go-nucleobase-containing-small-molecule-metabolic-process
go-translesion-synthesis	6.04077e-09	0.479638	1	0.999	5.58711e-05	2	go-translesion-synthesis
go-sin3-type-complex	6.09802e-09	0.538189	1	0.999	5.64006e-05	2	go-sin3-type-complex
go-axon-cytoplasm1	6.51378e-09	0.256928	1	1	6.0246e-05	2	go-axon-cytoplasm
go-atp-dependent-microtubule-motor-activity-plus-end-directed	6.96528e-09	0.705263	1	0.653	6.44219e-05	2	go-atp-dependent-microtubule-motor-activity-plus-end-directed
go-centriolar-satellite1	7.90767e-09	0.542165	1	0.978	7.31381e-05	2	go-centriolar-satellite
go-rna-phosphodiester-bond-hydrolysis-exonucleolytic	8.57643e-09	0.28624	1	1	7.93234e-05	2	go-rna-phosphodiester-bond-hydrolysis-exonucleolytic
go-transcriptionally-active-chromatin	1.04622e-08	0.406483	1	0.99	9.67646e-05	2	go-transcriptionally-active-chromatin
go-beta-catenin-tcf-complex-assembly	1.10589e-08	0.623147	1	0.973	0.000102284	2	go-beta-catenin-tcf-complex-assembly
go-negative-regulation-of-histone-h3-k4-methylation	1.25066e-08	0.285028	0.925	0.484	0.000115674	2	go-negative-regulation-of-histone-h3-k4-methylation
go-exoribonuclease-activity	1.29465e-08	0.314354	1	1	0.000119743	2	go-exoribonuclease-activity
go-homologous-recombination	1.4452e-08	0.383069	1	0.548	0.000133667	2	go-homologous-recombination
go-positive-regulation-of-transcription-of-nucleolar-large-rrna-by-rna-polymerase-i	1.47743e-08	0.507918	1	0.983	0.000136648	2	go-positive-regulation-of-transcription-of-nucleolar-large-rrna-by-rna-polymerase-i
go-positive-regulation-of-ubiquitin-protein-transferase-activity	1.5565e-08	0.505941	1	0.987	0.000143961	2	go-positive-regulation-of-ubiquitin-protein-transferase-activity
go-pigment-metabolic-process	1.6346e-08	0.475066	1	0.987	0.000151185	2	go-pigment-metabolic-process
go-perichromatin-fibrils	1.63565e-08	0.610564	1	0.825	0.000151282	2	go-perichromatin-fibrils
go-p53-binding	1.67e-08	0.282342	1	0.999	0.000154459	2	go-p53-binding
go-production-of-small-rna-involved-in-gene-silencing-by-rna	1.67511e-08	0.28828	1	0.999	0.000154931	2	go-production-of-small-rna-involved-in-gene-silencing-by-rna
go-histone-h3-k9-modification1	1.86385e-08	0.483225	1	0.987	0.000172387	2	go-histone-h3-k9-modification
go-negative-regulation-of-histone-h3-k9-methylation	2.67499e-08	0.755594	1	0.868	0.00024741	2	go-negative-regulation-of-histone-h3-k9-methylation
go-oxidized-dna-binding	3.21665e-08	0.567835	1	0.643	0.000297508	2	go-oxidized-dna-binding
go-trna-cytosine-methyltransferase-activity	3.39016e-08	0.668893	1	0.842	0.000313556	2	go-trna-cytosine-methyltransferase-activity
go-nucleotide-excision-repair-dna-incision	3.4197e-08	0.274089	1	1	0.000316288	2	go-nucleotide-excision-repair-dna-incision
go-mrna-modification	3.54447e-08	0.631052	1	0.935	0.000327828	2	go-mrna-modification
go-serine-threonine-protein-kinase-complex	3.95845e-08	0.279129	1	1	0.000366117	2	go-serine-threonine-protein-kinase-complex
go-rna-polymerase-iii-activity	4.35371e-08	0.400879	1	0.989	0.000402675	2	go-rna-polymerase-iii-activity
go-mrna-methylation	4.84006e-08	0.5937	1	0.957	0.000447657	2	go-mrna-methylation
go-glutamine-family-amino-acid-metabolic-process	4.95825e-08	0.742855	1	0.933	0.000458589	2	go-glutamine-family-amino-acid-metabolic-process
go-mitochondrial-rna-3-end-processing	5.02467e-08	0.49954	1	0.762	0.000464732	2	go-mitochondrial-rna-3-end-processing
go-protein-heterotetramerization	5.91331e-08	0.658261	0.988	0.628	0.000546922	2	go-protein-heterotetramerization
go-axonal-transport1	1.00706e-07	0.288175	1	1	0.00093143	2	go-axonal-transport
go-m7g-5-pppn-diphosphatase-activity	1.0147e-07	0.700758	1	0.714	0.000938497	2	go-m7g-5-pppn-diphosphatase-activity
go-mitotic-recombination	1.05149e-07	0.675626	1	0.821	0.000972526	2	go-mitotic-recombination
go-deoxyribonuclease-activity	1.05951e-07	0.723534	1	0.854	0.000979945	2	go-deoxyribonuclease-activity
go-neural-tube-formation1	1.26102e-07	0.394034	1	0.999	0.00116632	2	go-neural-tube-formation
go-histone-h3-k27-methylation	1.4048e-07	0.595467	1	0.954	0.0012993	2	go-histone-h3-k27-methylation
go-protein-methyltransferase-activity	1.40971e-07	0.595556	1	0.967	0.00130384	2	go-protein-methyltransferase-activity
go-dna-recombinase-mediator-complex	1.54919e-07	0.329832	0.963	0.532	0.00143285	2	go-dna-recombinase-mediator-complex
go-mitochondrial-trna-methylation	2.4776e-07	0.52178	0.988	0.719	0.00229153	2	go-mitochondrial-trna-methylation
go-regulation-of-ribosome-biogenesis	2.62993e-07	0.46398	1	0.991	0.00243242	2	go-regulation-of-ribosome-biogenesis
go-nucleoside-bisphosphate-biosynthetic-process	2.89248e-07	0.303295	1	0.991	0.00267525	2	go-nucleoside-bisphosphate-biosynthetic-process
go-intrinsic-apoptotic-signaling-pathway-in-response-to-dna-damage	2.97442e-07	0.316052	1	1	0.00275104	2	go-intrinsic-apoptotic-signaling-pathway-in-response-to-dna-damage
go-regulation-of-histone-h3-k4-methylation1	3.13625e-07	0.423212	1	0.99	0.00290072	2	go-regulation-of-histone-h3-k4-methylation
go-regulation-of-dendrite-development	3.47624e-07	0.398525	1	0.999	0.00321517	2	go-regulation-of-dendrite-development
go-esc-e-z-complex1	4.196e-07	0.448989	1	0.994	0.00388088	2	go-esc-e-z-complex
go-ribosome-assembly	4.29854e-07	0.78787	1	0.867	0.00397572	2	go-ribosome-assembly
go-aspartate-family-amino-acid-biosynthetic-process1	4.62017e-07	0.44609	1	0.98	0.00427319	2	go-aspartate-family-amino-acid-biosynthetic-process
go-positive-regulation-of-spindle-checkpoint	5.85925e-07	0.658683	1	0.785	0.00541922	2	go-positive-regulation-of-spindle-checkpoint
go-n-methyltransferase-activity	6.7823e-07	0.63389	1	0.925	0.00627295	2	go-n-methyltransferase-activity
go-ino80-type-complex	7.3049e-07	0.323018	1	0.997	0.0067563	2	go-ino80-type-complex
go-nuclear-pore-outer-ring	7.73079e-07	0.346974	1	0.981	0.00715021	2	go-nuclear-pore-outer-ring
go-protein-heterooligomerization	9.8985e-07	0.662291	1	0.994	0.00915512	2	go-protein-heterooligomerization
go-mitochondrial-rna-modification	1.01991e-06	0.618719	1	0.848	0.00943318	2	go-mitochondrial-rna-modification
go-polyadenylation-dependent-rna-catabolic-process	1.03627e-06	0.507767	1	0.905	0.00958445	2	go-polyadenylation-dependent-rna-catabolic-process
go-regulation-of-ubiquitin-protein-ligase-activity	1.06555e-06	0.497595	1	0.633	0.00985524	2	go-regulation-of-ubiquitin-protein-ligase-activity
go-endonuclease-activity-active-with-either-ribo-or-deoxyribonucleic-acids-and-producing-5-phosphomonoesters	1.08356e-06	0.623055	1	0.846	0.0100219	2	go-endonuclease-activity-active-with-either-ribo-or-deoxyribonucleic-acids-and-producing-5-phosphomonoesters
go-mitochondrial-dna-replication	1.13078e-06	0.705237	1	0.931	0.0104586	2	go-mitochondrial-dna-replication
go-histone-methyltransferase-activity-h3-k27-specific-	1.15936e-06	0.45141	0.963	0.65	0.0107229	2	go-histone-methyltransferase-activity-h3-k27-specific-
go-histone-h2a-k63-linked-ubiquitination	1.16081e-06	0.47924	1	0.912	0.0107363	2	go-histone-h2a-k63-linked-ubiquitination
go-formation-of-extrachromosomal-circular-dna	1.1664e-06	0.699907	1	0.869	0.0107881	2	go-formation-of-extrachromosomal-circular-dna
go-dna-directed-dna-polymerase-activity	1.18285e-06	0.65352	1	0.892	0.0109402	2	go-dna-directed-dna-polymerase-activity
go-response-to-x-ray	1.25114e-06	0.341723	1	0.996	0.0115718	2	go-response-to-x-ray
go-aminoacyl-trna-editing-activity	1.34327e-06	0.693306	1	0.964	0.0124239	2	go-aminoacyl-trna-editing-activity
go-aminoacyl-trna-metabolism-involved-in-translational-fidelity	1.34327e-06	0.693306	1	0.964	0.0124239	2	go-aminoacyl-trna-metabolism-involved-in-translational-fidelity
go-cdp-choline-pathway	1.3816e-06	0.270269	0.95	0.516	0.0127784	2	go-cdp-choline-pathway
go-regulation-of-transcription-by-rna-polymerase-i	1.52913e-06	0.276216	1	0.999	0.0141429	2	go-regulation-of-transcription-by-rna-polymerase-i
go-nucleoside-metabolic-process	1.58228e-06	0.327875	1	0.997	0.0146345	2	go-nucleoside-metabolic-process
go-trna-catabolic-process	1.65279e-06	0.609509	1	0.816	0.0152866	2	go-trna-catabolic-process
go-microtubule-polymerization-or-depolymerization1	1.81314e-06	0.408903	1	0.987	0.0167698	2	go-microtubule-polymerization-or-depolymerization
go-positive-regulation-of-double-strand-break-repair-via-homologous-recombination	1.81986e-06	0.679501	1	0.874	0.0168318	2	go-positive-regulation-of-double-strand-break-repair-via-homologous-recombination
go-minus-end-directed-organelle-transport-along-microtubule	1.85707e-06	0.572891	0.925	0.626	0.017176	2	go-minus-end-directed-organelle-transport-along-microtubule
go-replication-fork-protection	1.87342e-06	0.389817	0.975	0.58	0.0173272	2	go-replication-fork-protection
go-microtubule-based-movement	1.88068e-06	0.282966	1	0.999	0.0173944	2	go-microtubule-based-movement
go-mitochondrial-genome-maintenance	2.31347e-06	0.585233	0.988	0.957	0.0213973	2	go-mitochondrial-genome-maintenance
go-pyrimidine-nucleotide-catabolic-process	2.53649e-06	0.700038	1	0.879	0.02346	2	go-pyrimidine-nucleotide-catabolic-process
go-nuclear-retention-of-pre-mrna-at-the-site-of-transcription	3.20807e-06	0.47518	0.988	0.704	0.0296714	2	go-nuclear-retention-of-pre-mrna-at-the-site-of-transcription
go-manganese-ion-binding	3.25018e-06	0.467737	1	0.993	0.0300609	2	go-manganese-ion-binding
go-nucleoside-kinase-activity	3.37864e-06	0.623434	1	0.937	0.031249	2	go-nucleoside-kinase-activity
go-flap-endonuclease-activity	3.6981e-06	0.309811	0.938	0.521	0.0342037	2	go-flap-endonuclease-activity
go-regulation-of-cytoplasmic-translation	3.78617e-06	0.503644	1	0.987	0.0350183	2	go-regulation-of-cytoplasmic-translation
go-negative-regulation-of-dna-damage-checkpoint	4.07213e-06	0.515438	0.988	0.822	0.0376631	2	go-negative-regulation-of-dna-damage-checkpoint
go-base-excision-repair-ap-site-formation	4.58705e-06	0.708211	1	0.901	0.0424256	2	go-base-excision-repair-ap-site-formation
go-pyrimidine-nucleobase-biosynthetic-process	4.67165e-06	0.616551	1	0.763	0.0432081	2	go-pyrimidine-nucleobase-biosynthetic-process
go-pam-complex-tim23-associated-import-motor	5.5473e-06	0.471872	1	0.89	0.051307	2	go-pam-complex-tim23-associated-import-motor
go-dna-repair-complex	5.67612e-06	0.361874	1	0.993	0.0524985	2	go-dna-repair-complex
go-oligosaccharide-lipid-intermediate-biosynthetic-process	5.84167e-06	0.535568	1	0.947	0.0540296	2	go-oligosaccharide-lipid-intermediate-biosynthetic-process
go-nucleotide-diphosphatase-activity	6.74774e-06	0.741712	0.988	0.831	0.0624099	2	go-nucleotide-diphosphatase-activity
go-modulation-of-transcription-in-other-organism-involved-in-symbiotic-interaction	7.29178e-06	0.468633	1	0.99	0.0674417	2	go-modulation-of-transcription-in-other-organism-involved-in-symbiotic-interaction
go-mitotic-spindle-pole	7.3823e-06	0.368514	1	0.996	0.0682789	2	go-mitotic-spindle-pole
go-nucleoside-triphosphate-diphosphatase-activity	8.23351e-06	0.7054	1	0.828	0.0761518	2	go-nucleoside-triphosphate-diphosphatase-activity
go-rna-polymerase-ii-ctd-heptapeptide-repeat-kinase-activity	9.4798e-06	0.277541	1	0.999	0.0876786	2	go-rna-polymerase-ii-ctd-heptapeptide-repeat-kinase-activity
go-water-soluble-vitamin-metabolic-process	1.09932e-05	0.530502	1	0.974	0.101676	2	go-water-soluble-vitamin-metabolic-process
go-centrosome-separation	1.10031e-05	0.604682	1	0.904	0.101767	2	go-centrosome-separation
go-l-serine-biosynthetic-process	1.10071e-05	0.416915	1	0.944	0.101805	2	go-l-serine-biosynthetic-process
go-neural-tube-development1	1.11271e-05	0.425623	1	0.974	0.102914	2	go-neural-tube-development
go-annealing-helicase-activity	1.2238e-05	0.44678	1	0.641	0.113189	2	go-annealing-helicase-activity
go-methylated-histone-binding	1.28309e-05	0.3597	1	0.99	0.118673	2	go-methylated-histone-binding
go-regulation-of-cholesterol-biosynthetic-process	1.2831e-05	0.25424	1	0.999	0.118674	2	go-regulation-of-cholesterol-biosynthetic-process
go-cell-division-site	1.30487e-05	0.26257	1	1	0.120688	2	go-cell-division-site
go-haus-complex	1.52284e-05	0.547343	1	0.712	0.140847	2	go-haus-complex
go-dna-polymerase-complex	1.71846e-05	0.667521	1	0.917	0.15894	2	go-dna-polymerase-complex
go-nuclear-export-signal-receptor-activity	1.93741e-05	0.34715	1	0.986	0.179191	2	go-nuclear-export-signal-receptor-activity
go-regulation-of-histone-h4-k16-acetylation	2.06395e-05	0.591914	1	0.765	0.190894	2	go-regulation-of-histone-h4-k16-acetylation
go-swr1-complex	2.07924e-05	0.380521	1	0.984	0.192309	2	go-swr1-complex
go-hydrolase-activity-acting-on-ester-bonds	2.08909e-05	0.3001	1	0.991	0.19322	2	go-hydrolase-activity-acting-on-ester-bonds
go-chromatin-dna-binding	2.15387e-05	0.293137	1	1	0.199212	2	go-chromatin-dna-binding
go-dna-topoisomerase-binding	2.16208e-05	0.480592	0.988	0.659	0.19997	2	go-dna-topoisomerase-binding
go-ciliary-basal-body	2.16724e-05	0.509929	1	0.907	0.200448	2	go-ciliary-basal-body
go-cilium-organization1	2.24145e-05	0.303732	1	0.99	0.207312	2	go-cilium-organization
go-exodeoxyribonuclease-activity	2.25092e-05	0.518632	0.988	0.663	0.208187	2	go-exodeoxyribonuclease-activity
go-deoxyribonucleoside-triphosphate-catabolic-process	2.26749e-05	0.661194	1	0.839	0.209721	2	go-deoxyribonucleoside-triphosphate-catabolic-process
go-protein-phosphatase-2a-binding	2.28385e-05	0.390588	1	0.994	0.211233	2	go-protein-phosphatase-2a-binding
go-regulation-of-telomere-capping	2.39875e-05	0.356494	1	0.989	0.221861	2	go-regulation-of-telomere-capping
go-modification-of-synaptic-structure	2.70121e-05	0.467185	1	0.999	0.249835	2	go-modification-of-synaptic-structure
go-dna-endoreduplication	2.73869e-05	0.689392	1	0.928	0.253302	2	go-dna-endoreduplication
go-l-serine-metabolic-process	2.75978e-05	0.350223	0.975	0.63	0.255252	2	go-l-serine-metabolic-process
go-negative-regulation-of-telomere-maintenance-via-telomere-lengthening	2.88233e-05	0.40443	1	0.999	0.266587	2	go-negative-regulation-of-telomere-maintenance-via-telomere-lengthening
go-rab-protein-signal-transduction	3.01871e-05	0.351972	1	0.997	0.2792	2	go-rab-protein-signal-transduction
go-gamma-tubulin-complex	3.09629e-05	0.280768	1	0.99	0.286376	2	go-gamma-tubulin-complex
go-coenzyme-a-biosynthetic-process	3.3861e-05	0.519581	1	0.927	0.31318	2	go-coenzyme-a-biosynthetic-process
go-negative-regulation-of-helicase-activity	3.54345e-05	0.308915	0.963	0.562	0.327734	2	go-negative-regulation-of-helicase-activity
go-protein-transport-along-microtubule1	3.70346e-05	0.281823	1	0.994	0.342533	2	go-protein-transport-along-microtubule
go-iswi-type-complex	3.72042e-05	0.270309	1	0.996	0.344102	2	go-iswi-type-complex
go-dna-ligation	4.02345e-05	0.559581	1	0.938	0.372129	2	go-dna-ligation
go-positive-regulation-of-dendritic-spine-morphogenesis	4.1836e-05	0.265412	0.975	0.947	0.386941	2	go-positive-regulation-of-dendritic-spine-morphogenesis
go-prenyltransferase-activity	4.19776e-05	0.353752	1	0.989	0.388251	2	go-prenyltransferase-activity
go-regulation-of-dna-damage-checkpoint	4.20918e-05	0.594713	0.975	0.937	0.389307	2	go-regulation-of-dna-damage-checkpoint
go-axon1	4.59555e-05	0.593302	1	0.976	0.425042	2	go-axon
go-flotillin-complex	5.08661e-05	0.498429	1	0.989	0.470461	2	go-flotillin-complex
go-tube-closure1	5.32e-05	0.457646	1	0.978	0.492047	2	go-tube-closure
go-positive-regulation-of-dendrite-development	5.40445e-05	0.445299	1	0.99	0.499858	2	go-positive-regulation-of-dendrite-development
go-peptidyl-histidine-modification	5.70153e-05	0.659091	1	0.836	0.527334	2	go-peptidyl-histidine-modification
go-purine-nucleoside-biosynthetic-process1	5.87069e-05	0.375183	1	0.994	0.54298	2	go-purine-nucleoside-biosynthetic-process
go-peptidase-activator-activity1	7.23234e-05	0.354211	1	1	0.668919	2	go-peptidase-activator-activity
go-ribosomal-large-subunit-export-from-nucleus	7.36108e-05	0.28721	1	0.994	0.680826	2	go-ribosomal-large-subunit-export-from-nucleus
go-pre-snornp-complex	7.64124e-05	0.398624	1	0.976	0.706739	2	go-pre-snornp-complex
go-regulation-of-cell-division	8.11761e-05	0.68392	1	0.891	0.750797	2	go-regulation-of-cell-division
go-nuclear-receptor-transcription-coactivator-activity	8.12662e-05	0.276175	1	1	0.751631	2	go-nuclear-receptor-transcription-coactivator-activity
go-regulation-of-release-of-cytochrome-c-from-mitochondria	8.19819e-05	0.260621	1	0.997	0.758251	2	go-regulation-of-release-of-cytochrome-c-from-mitochondria
go-cellular-response-to-light-stimulus	9.00606e-05	0.459126	1	0.987	0.832971	2	go-cellular-response-to-light-stimulus
go-negative-regulation-of-b-cell-apoptotic-process	9.3018e-05	0.264732	1	0.96	0.860323	2	go-negative-regulation-of-b-cell-apoptotic-process
go-trna-guanine-methyltransferase-activity	0.000111089	0.652746	0.988	0.915	1	2	go-trna-guanine-methyltransferase-activity
go-neuron-part	0.000118542	0.498748	1	0.99	1	2	go-neuron-part
go-positive-regulation-of-mitotic-sister-chromatid-separation	0.000124678	0.644046	1	0.944	1	2	go-positive-regulation-of-mitotic-sister-chromatid-separation
go-imp-biosynthetic-process	0.00017336	0.557563	1	0.908	1	2	go-imp-biosynthetic-process
go-protein-localization-to-chromatin	0.00018225	0.582911	1	0.859	1	2	go-protein-localization-to-chromatin
go-pre-mirna-binding	0.000194456	0.363753	1	0.964	1	2	go-pre-mirna-binding
go-sin3-complex	0.000222617	0.425176	1	0.997	1	2	go-sin3-complex
go-nucleoside-triphosphate-biosynthetic-process	0.000223988	0.268054	1	0.977	1	2	go-nucleoside-triphosphate-biosynthetic-process
go-small-nucleolar-ribonucleoprotein-complex1	0.000231051	0.411899	1	0.991	1	2	go-small-nucleolar-ribonucleoprotein-complex
go-dosage-compensation	0.000233446	0.369185	1	0.99	1	2	go-dosage-compensation
go-protein-localization-to-nuclear-envelope	0.000235866	0.409735	1	0.999	1	2	go-protein-localization-to-nuclear-envelope
go-er-membrane-insertion-complex	0.000256475	0.320949	0.863	0.537	1	2	go-er-membrane-insertion-complex
go-dna-strand-renaturation	0.000274948	0.662595	1	0.799	1	2	go-dna-strand-renaturation
go-positive-regulation-of-cell-cycle-arrest	0.000282481	0.438602	1	0.986	1	2	go-positive-regulation-of-cell-cycle-arrest
go-transcription-initiation-from-rna-polymerase-iii-promoter	0.000287067	0.579183	1	0.892	1	2	go-transcription-initiation-from-rna-polymerase-iii-promoter
go-ump-biosynthetic-process	0.000301569	0.620702	1	0.803	1	2	go-ump-biosynthetic-process
go-negative-regulation-of-telomere-maintenance-via-telomerase	0.000322972	0.528093	1	0.994	1	2	go-negative-regulation-of-telomere-maintenance-via-telomerase
go-actomyosin-contractile-ring-organization	0.000326559	0.26586	0.95	0.595	1	2	go-actomyosin-contractile-ring-organization
go-gpi-anchor-biosynthetic-process	0.000333522	0.352772	1	0.968	1	2	go-gpi-anchor-biosynthetic-process
go-nuclear-heterochromatin	0.000338314	0.265419	1	1	1	2	go-nuclear-heterochromatin
go-phosphoprotein-phosphatase-activity	0.000338996	0.306215	1	0.997	1	2	go-phosphoprotein-phosphatase-activity
go-cell-part-morphogenesis1	0.000342426	0.29899	1	0.994	1	2	go-cell-part-morphogenesis
go-modification-of-postsynaptic-structure	0.000345195	0.642315	1	0.997	1	2	go-modification-of-postsynaptic-structure
go-5-3-exonuclease-activity	0.000358615	0.630357	1	0.858	1	2	go-5-3-exonuclease-activity
go-centriole-assembly	0.000369881	0.568921	0.988	0.846	1	2	go-centriole-assembly
go-endoribonuclease-activity-producing-5-phosphomonoesters	0.000374055	0.557306	1	0.865	1	2	go-endoribonuclease-activity-producing-5-phosphomonoesters
go-transcription-factor-tfiiic-complex	0.000441582	0.501414	1	0.826	1	2	go-transcription-factor-tfiiic-complex
go-chromatin-disassembly1	0.000450057	0.358774	1	0.98	1	2	go-chromatin-disassembly
go-protein-localization-to-microtubule-organizing-center	0.000471913	0.275981	1	0.997	1	2	go-protein-localization-to-microtubule-organizing-center
go-host-intracellular-part	0.00048464	0.254215	0.988	0.943	1	2	go-host-intracellular-part
go-positive-regulation-of-histone-h4-acetylation	0.000491263	0.311298	1	0.633	1	2	go-positive-regulation-of-histone-h4-acetylation
go-positive-regulation-of-response-to-dna-damage-stimulus	0.000495707	0.405884	1	0.989	1	2	go-positive-regulation-of-response-to-dna-damage-stimulus
go-general-transcription-initiation-factor-activity	0.000516558	0.314563	1	0.99	1	2	go-general-transcription-initiation-factor-activity
go-positive-regulation-of-cell-cycle-checkpoint	0.000558007	0.587291	1	0.831	1	2	go-positive-regulation-of-cell-cycle-checkpoint
go-rna-polymerase-iii-transcription-factor-complex	0.000598667	0.514982	1	0.948	1	2	go-rna-polymerase-iii-transcription-factor-complex
go-snorna-localization	0.000646839	0.395788	0.988	0.862	1	2	go-snorna-localization
go-serine-type-carboxypeptidase-activity	0.000649743	0.503015	0.95	0.805	1	2	go-serine-type-carboxypeptidase-activity
go-ncrna-3-end-processing	0.000785689	0.565067	1	0.857	1	2	go-ncrna-3-end-processing
go-positive-regulation-of-transcription-of-notch-receptor-target	0.000796908	0.261304	0.938	0.894	1	2	go-positive-regulation-of-transcription-of-notch-receptor-target
go-regulation-of-mitotic-centrosome-separation	0.00081945	0.510095	0.988	0.762	1	2	go-regulation-of-mitotic-centrosome-separation
go-protein-folding-chaperone	0.000828293	0.40122	1	1	1	2	go-protein-folding-chaperone
go-endoribonuclease-activity	0.00086257	0.521568	1	0.937	1	2	go-endoribonuclease-activity
go-annealing-activity	0.000881631	0.361309	1	0.999	1	2	go-annealing-activity
go-cap-independent-translational-initiation	0.00092712	0.387959	1	0.95	1	2	go-cap-independent-translational-initiation
go-peptidyl-arginine-methylation	0.000938591	0.615474	1	0.762	1	2	go-peptidyl-arginine-methylation
go-pigment-granule-localization1	0.000945178	0.526943	1	0.98	1	2	go-pigment-granule-localization
go-protein-dna-complex-disassembly1	0.000954063	0.352221	1	0.976	1	2	go-protein-dna-complex-disassembly
go-regulation-of-cellular-respiration	0.000963108	0.437545	1	0.993	1	2	go-regulation-of-cellular-respiration
go-histone-acetyltransferase-activity-h4-k5-specific-	0.00106505	0.47311	1	0.961	1	2	go-histone-acetyltransferase-activity-h4-k5-specific-
go-dna-methylation-or-demethylation	0.00109247	0.616686	1	0.941	1	2	go-dna-methylation-or-demethylation
go-positive-regulation-of-dna-replication	0.00112757	0.609632	1	0.858	1	2	go-positive-regulation-of-dna-replication
go-rna-cap-binding1	0.0012815	0.276533	1	0.997	1	2	go-rna-cap-binding
go-telomeric-loop-disassembly	0.00128562	0.36101	0.938	0.618	1	2	go-telomeric-loop-disassembly
go-kinetochore-microtubule	0.0013052	0.492802	1	0.815	1	2	go-kinetochore-microtubule
go-chromosome-movement-towards-spindle-pole	0.00139419	0.57317	1	0.925	1	2	go-chromosome-movement-towards-spindle-pole
go-mitochondrion-localization	0.00142466	0.605478	1	0.974	1	2	go-mitochondrion-localization
go-regulation-of-cell-cycle-g1-s-phase-transition1	0.00146149	0.308562	1	0.993	1	2	go-regulation-of-cell-cycle-g1-s-phase-transition
go-pteridine-containing-compound-metabolic-process	0.00150985	0.609705	1	0.888	1	2	go-pteridine-containing-compound-metabolic-process
go-guanosine-containing-compound-biosynthetic-process	0.00151538	0.481122	1	0.976	1	2	go-guanosine-containing-compound-biosynthetic-process
go-oxidative-dna-demethylation	0.0019654	0.292341	0.912	0.615	1	2	go-oxidative-dna-demethylation
go-post-mrna-release-spliceosomal-complex	0.00206136	0.408747	1	0.986	1	2	go-post-mrna-release-spliceosomal-complex
go-response-to-l-glutamate	0.00213508	0.504446	1	0.966	1	2	go-response-to-l-glutamate
go-de-novo-pyrimidine-nucleobase-biosynthetic-process	0.00221868	0.305453	0.887	0.591	1	2	go-de-novo-pyrimidine-nucleobase-biosynthetic-process
go-dna-apurinic-or-apyrimidinic-site-endonuclease-activity	0.00222881	0.534495	1	0.743	1	2	go-dna-apurinic-or-apyrimidinic-site-endonuclease-activity
go-scarna-localization-to-cajal-body	0.0022625	0.440152	1	0.964	1	2	go-scarna-localization-to-cajal-body
go-mismatch-repair-complex-binding	0.00233332	0.527316	1	0.824	1	2	go-mismatch-repair-complex-binding
go-protein-carboxyl-o-methyltransferase-activity	0.00236297	0.279052	1	0.915	1	2	go-protein-carboxyl-o-methyltransferase-activity
go-error-prone-translesion-synthesis1	0.00275404	0.355469	1	0.997	1	2	go-error-prone-translesion-synthesis
go-kinesin-binding	0.00293363	0.263198	0.975	0.875	1	2	go-kinesin-binding
go-regulation-of-chromatin-silencing	0.00308378	0.565749	1	0.885	1	2	go-regulation-of-chromatin-silencing
go-telomeric-d-loop-disassembly	0.00314042	0.418716	0.975	0.676	1	2	go-telomeric-d-loop-disassembly
go-nucleoside-salvage	0.003269	0.534087	1	0.815	1	2	go-nucleoside-salvage
go-regulation-of-b-cell-apoptotic-process	0.00330123	0.29604	1	0.976	1	2	go-regulation-of-b-cell-apoptotic-process
go-establishment-of-mitochondrion-localization	0.00381628	0.510478	1	0.981	1	2	go-establishment-of-mitochondrion-localization
go-dna-helicase-complex	0.00388041	0.367393	1	0.97	1	2	go-dna-helicase-complex
go-polynucleotide-dephosphorylation	0.00393073	0.344582	0.988	0.703	1	2	go-polynucleotide-dephosphorylation
go-acetyl-coa-biosynthetic-process	0.00409344	0.428837	1	0.983	1	2	go-acetyl-coa-biosynthetic-process
go-ciliary-tip1	0.00426555	0.353165	1	0.953	1	2	go-ciliary-tip
go-regulation-of-modification-of-postsynaptic-structure	0.00461847	0.579538	1	0.717	1	2	go-regulation-of-modification-of-postsynaptic-structure
go-mll3-4-complex1	0.00504957	0.486607	1	0.933	1	2	go-mll3-4-complex
go-negative-regulation-of-dna-endoreduplication	0.00507222	0.479194	1	0.924	1	2	go-negative-regulation-of-dna-endoreduplication
go-gpi-anchor-transamidase-complex	0.0053484	0.336407	0.975	0.732	1	2	go-gpi-anchor-transamidase-complex
go-gpi-anchor-transamidase-activity	0.0053484	0.336407	0.975	0.732	1	2	go-gpi-anchor-transamidase-activity
go-rna-polymerase-i-preinitiation-complex-assembly	0.00539655	0.536057	0.988	0.915	1	2	go-rna-polymerase-i-preinitiation-complex-assembly
go-nucleotide-salvage	0.00628956	0.633506	1	0.877	1	2	go-nucleotide-salvage
go-midbody-abscission	0.00631494	0.267867	0.988	1	1	2	go-midbody-abscission
go-tho-complex1	0.00641565	0.36276	1	0.917	1	2	go-tho-complex
go-acetyl-coa-biosynthetic-process-from-pyruvate	0.00659227	0.486133	1	0.983	1	2	go-acetyl-coa-biosynthetic-process-from-pyruvate
go-positive-regulation-of-mitotic-sister-chromatid-segregation	0.00774205	0.261094	1	0.999	1	2	go-positive-regulation-of-mitotic-sister-chromatid-segregation
go-hair-follicle-maturation	0.00776866	0.269574	0.988	0.874	1	2	go-hair-follicle-maturation
go-microtubule-motor-activity	0.00784151	0.341872	0.988	0.663	1	2	go-microtubule-motor-activity
go-n-terminal-protein-acetyltransferase-complex	0.00788768	0.313086	1	0.967	1	2	go-n-terminal-protein-acetyltransferase-complex
go-glyceraldehyde-3-phosphate-dehydrogenase-nadplus--non-phosphorylating-activity	0.00813737	0.383893	0.988	0.799	1	2	go-glyceraldehyde-3-phosphate-dehydrogenase-nadplus--non-phosphorylating-activity
go-negative-regulation-of-mrna-3-end-processing	0.00902592	0.298763	1	0.971	1	2	go-negative-regulation-of-mrna-3-end-processing
go-peptidyl-arginine-n-methylation	0.00930772	0.594504	1	0.842	1	2	go-peptidyl-arginine-n-methylation
go-protein-arginine-n-methyltransferase-activity	0.00930772	0.594504	1	0.842	1	2	go-protein-arginine-n-methyltransferase-activity
go-positive-regulation-of-centrosome-cycle	0.0095346	0.532414	1	0.945	1	2	go-positive-regulation-of-centrosome-cycle
go-apical-plasma-membrane	2.21175e-98	0.958326	0.973	0.073	2.04565e-94	3	go-apical-plasma-membrane
go-hormone-metabolic-process	4.29194e-86	0.336054	0.92	0.077	3.96961e-82	3	go-hormone-metabolic-process
go-blood-microparticle	3.7492e-83	1.38032	0.96	0.095	3.46764e-79	3	go-blood-microparticle
go-organic-anion-transport	2.89906e-77	0.258613	0.867	0.078	2.68134e-73	3	go-organic-anion-transport
go-acute-phase-response	1.81204e-76	0.273078	0.773	0.051	1.67595e-72	3	go-acute-phase-response
go-acute-inflammatory-response	9.37188e-75	0.360522	0.787	0.056	8.66806e-71	3	go-acute-inflammatory-response
go-endopeptidase-regulator-activity	2.35406e-74	0.400083	0.88	0.078	2.17727e-70	3	go-endopeptidase-regulator-activity
go-regulation-of-hormone-levels	2.97483e-68	0.417021	0.987	0.144	2.75142e-64	3	go-regulation-of-hormone-levels
go-regulation-of-lipoprotein-lipase-activity	3.93825e-68	0.899137	0.947	0.141	3.64249e-64	3	go-regulation-of-lipoprotein-lipase-activity
go-xenobiotic-metabolic-process	1.6227e-67	0.826662	0.907	0.123	1.50084e-63	3	go-xenobiotic-metabolic-process
go-positive-regulation-of-lipid-catabolic-process	1.1978e-66	0.53924	0.893	0.12	1.10785e-62	3	go-positive-regulation-of-lipid-catabolic-process
go-triglyceride-catabolic-process	1.52074e-66	0.470618	0.947	0.138	1.40653e-62	3	go-triglyceride-catabolic-process
go-regulation-of-very-low-density-lipoprotein-particle-clearance	1.01031e-63	0.423669	1	0.189	9.34435e-60	3	go-regulation-of-very-low-density-lipoprotein-particle-clearance
go-neutral-lipid-catabolic-process	2.81129e-63	1.18795	0.973	0.181	2.60016e-59	3	go-neutral-lipid-catabolic-process
go-protein-activation-cascade	5.20238e-63	1.20446	1	0.198	4.81169e-59	3	go-protein-activation-cascade
go-regulation-of-very-low-density-lipoprotein-particle-remodeling	1.07027e-62	1.4553	1	0.212	9.89893e-59	3	go-regulation-of-very-low-density-lipoprotein-particle-remodeling
go-apical-part-of-cell	1.56534e-61	1.70534	1	0.246	1.44778e-57	3	go-apical-part-of-cell
go-cellular-response-to-xenobiotic-stimulus	1.85131e-59	0.737476	0.893	0.141	1.71228e-55	3	go-cellular-response-to-xenobiotic-stimulus
go-regulation-of-lipid-catabolic-process	4.60241e-58	0.528838	0.947	0.178	4.25677e-54	3	go-regulation-of-lipid-catabolic-process
go-protein-containing-complex-remodeling	1.53998e-57	1.64204	1	0.252	1.42433e-53	3	go-protein-containing-complex-remodeling
go-lipid-localization	2.33162e-57	1.09438	0.987	0.215	2.15651e-53	3	go-lipid-localization
go-intestinal-absorption	5.75011e-56	1.04572	0.987	0.217	5.31828e-52	3	go-intestinal-absorption
go-acylglycerol-homeostasis	6.43854e-56	0.977531	0.947	0.184	5.95501e-52	3	go-acylglycerol-homeostasis
go-fibrinogen-complex	1.51874e-53	1.22181	1	0.286	1.40468e-49	3	go-fibrinogen-complex
go-neutral-lipid-metabolic-process	6.61216e-52	1.20745	0.973	0.252	6.11559e-48	3	go-neutral-lipid-metabolic-process
go-diterpenoid-metabolic-process	3.32021e-51	1.18522	0.987	0.251	3.07086e-47	3	go-diterpenoid-metabolic-process
go-lipid-transporter-activity	4.32524e-51	0.628612	0.947	0.215	4.00041e-47	3	go-lipid-transporter-activity
go-intermediate-density-lipoprotein-particle	1.21904e-49	1.47635	1	0.339	1.12749e-45	3	go-intermediate-density-lipoprotein-particle
go-triglyceride-rich-lipoprotein-particle-remodeling	2.94066e-49	1.52927	1	0.316	2.71982e-45	3	go-triglyceride-rich-lipoprotein-particle-remodeling
go-very-low-density-lipoprotein-particle-remodeling	5.37094e-49	1.4581	1	0.306	4.96759e-45	3	go-very-low-density-lipoprotein-particle-remodeling
go-response-to-xenobiotic-stimulus	5.38546e-49	0.627646	0.92	0.208	4.98101e-45	3	go-response-to-xenobiotic-stimulus
go-negative-regulation-of-coagulation	7.54878e-49	0.619476	1	0.258	6.98187e-45	3	go-negative-regulation-of-coagulation
go-sterol-homeostasis	4.7582e-48	1.41879	1	0.302	4.40086e-44	3	go-sterol-homeostasis
go-toxic-substance-binding	8.85655e-48	0.260128	0.88	0.194	8.19142e-44	3	go-toxic-substance-binding
go-high-density-lipoprotein-particle	1.40351e-46	1.89325	1	0.449	1.29811e-42	3	go-high-density-lipoprotein-particle
go-primary-alcohol-catabolic-process	4.83923e-46	0.265513	0.893	0.211	4.4758e-42	3	go-primary-alcohol-catabolic-process
go-protein-lipid-complex	3.785e-45	1.84176	1	0.467	3.50075e-41	3	go-protein-lipid-complex
go-reverse-cholesterol-transport	4.12299e-45	1.72543	1	0.396	3.81336e-41	3	go-reverse-cholesterol-transport
go-chylomicron	8.40452e-45	1.88265	1	0.464	7.77334e-41	3	go-chylomicron
go-protein-lipid-complex-subunit-organization	1.76976e-44	1.86857	1	0.433	1.63685e-40	3	go-protein-lipid-complex-subunit-organization
go-phospholipid-efflux	3.72049e-44	1.84703	1	0.52	3.44108e-40	3	go-phospholipid-efflux
go-chylomicron-remodeling	3.90699e-44	1.51689	1	0.433	3.61357e-40	3	go-chylomicron-remodeling
go-lipid-homeostasis	4.24499e-44	1.56531	1	0.355	3.92619e-40	3	go-lipid-homeostasis
go-triglyceride-rich-plasma-lipoprotein-particle	6.23561e-44	1.71225	1	0.487	5.76731e-40	3	go-triglyceride-rich-plasma-lipoprotein-particle
go-ion-homeostasis	7.96796e-44	0.457168	0.947	0.235	7.36957e-40	3	go-ion-homeostasis
go-glycerolipid-catabolic-process	3.26558e-43	1.4378	1	0.382	3.02033e-39	3	go-glycerolipid-catabolic-process
go-high-density-lipoprotein-particle-remodeling	7.94905e-43	1.84414	1	0.483	7.35208e-39	3	go-high-density-lipoprotein-particle-remodeling
go-chylomicron-assembly	8.05088e-43	1.82218	1	0.564	7.44626e-39	3	go-chylomicron-assembly
go-organic-acid-binding	1.02081e-42	0.436929	0.947	0.276	9.44146e-39	3	go-organic-acid-binding
go-peptidase-regulator-activity	2.25708e-42	0.601352	0.92	0.228	2.08757e-38	3	go-peptidase-regulator-activity
go-lipoprotein-metabolic-process	2.59856e-42	1.25129	1	0.349	2.4034e-38	3	go-lipoprotein-metabolic-process
go-spherical-high-density-lipoprotein-particle	2.80043e-42	1.55722	1	0.462	2.59012e-38	3	go-spherical-high-density-lipoprotein-particle
go-basolateral-plasma-membrane	2.80068e-42	1.3089	0.987	0.412	2.59035e-38	3	go-basolateral-plasma-membrane
go-neutral-lipid-biosynthetic-process	4.09256e-42	0.713779	0.987	0.36	3.78521e-38	3	go-neutral-lipid-biosynthetic-process
go-isoprenoid-metabolic-process	7.22286e-42	1.32179	1	0.365	6.68042e-38	3	go-isoprenoid-metabolic-process
go-regulation-of-plasma-lipoprotein-particle-levels	1.12083e-41	1.83415	1	0.496	1.03666e-37	3	go-regulation-of-plasma-lipoprotein-particle-levels
go-high-density-lipoprotein-particle-clearance	2.16744e-41	1.40476	1	0.409	2.00467e-37	3	go-high-density-lipoprotein-particle-clearance
go-vesicle-lumen	5.33301e-41	1.02946	1	1	4.9325e-37	3	go-vesicle-lumen
go-chemical-homeostasis	1.02017e-40	1.4681	1	0.403	9.43554e-37	3	go-chemical-homeostasis
go-regulation-of-lipase-activity	1.07612e-40	0.291349	1	0.299	9.95302e-37	3	go-regulation-of-lipase-activity
go-regulation-of-wound-healing	1.21163e-40	0.950937	1	0.392	1.12064e-36	3	go-regulation-of-wound-healing
go-regulation-of-coagulation	1.27779e-40	0.821331	0.987	0.336	1.18183e-36	3	go-regulation-of-coagulation
go-monocarboxylic-acid-binding	1.39001e-40	0.371123	0.933	0.275	1.28562e-36	3	go-monocarboxylic-acid-binding
go-phosphatidylcholine-sterol-o-acyltransferase-activator-activity	1.82565e-40	1.61978	1	0.521	1.68854e-36	3	go-phosphatidylcholine-sterol-o-acyltransferase-activator-activity
go-positive-regulation-of-cholesterol-esterification	4.36156e-40	1.6355	1	0.546	4.03401e-36	3	go-positive-regulation-of-cholesterol-esterification
go-protein-lipid-complex-assembly	4.99505e-40	1.81181	1	0.694	4.61992e-36	3	go-protein-lipid-complex-assembly
go-lipid-catabolic-process	6.57394e-40	2.1663	1	0.678	6.08024e-36	3	go-lipid-catabolic-process
go-regulation-of-cholesterol-esterification	7.27319e-40	1.62283	1	0.6	6.72698e-36	3	go-regulation-of-cholesterol-esterification
go-cholesterol-efflux	1.03044e-39	1.49377	1	0.437	9.53054e-36	3	go-cholesterol-efflux
go-regulation-of-lipid-metabolic-process	1.30461e-39	1.43908	1	1	1.20663e-35	3	go-regulation-of-lipid-metabolic-process
go-regulation-of-sterol-transport	1.62913e-39	0.34669	0.96	0.285	1.50678e-35	3	go-regulation-of-sterol-transport
go-lipid-metabolic-process	1.86611e-39	1.98989	1	0.987	1.72597e-35	3	go-lipid-metabolic-process
go-platelet-alpha-granule-lumen	2.15241e-39	1.78348	1	0.896	1.99076e-35	3	go-platelet-alpha-granule-lumen
go-azurophil-granule	2.15334e-39	0.822953	1	1	1.99162e-35	3	go-azurophil-granule
go-enzyme-inhibitor-activity	4.89804e-39	1.75198	1	0.872	4.5302e-35	3	go-enzyme-inhibitor-activity
go-steroid-metabolic-process	5.8931e-39	2.04088	1	0.919	5.45053e-35	3	go-steroid-metabolic-process
go-receptor-mediated-endocytosis	5.97412e-39	0.587901	0.96	0.299	5.52546e-35	3	go-receptor-mediated-endocytosis
go-secretion	6.27162e-39	1.30987	1	1	5.80062e-35	3	go-secretion
go-triglyceride-rich-lipoprotein-particle-clearance	7.49046e-39	0.883957	1	0.365	6.92793e-35	3	go-triglyceride-rich-lipoprotein-particle-clearance
go-steroid-esterification	1.05979e-38	1.54243	1	0.59	9.80203e-35	3	go-steroid-esterification
go-cellular-lipid-catabolic-process	1.36521e-38	1.82544	1	0.969	1.26268e-34	3	go-cellular-lipid-catabolic-process
go-platelet-degranulation1	2.14955e-38	1.43933	1	0.991	1.98812e-34	3	go-platelet-degranulation
go-transmembrane-transport	2.40496e-38	1.22883	0.987	0.358	2.22435e-34	3	go-transmembrane-transport
go-organic-hydroxy-compound-metabolic-process	6.84536e-38	1.89916	1	0.805	6.33127e-34	3	go-organic-hydroxy-compound-metabolic-process
go-brush-border	7.56669e-38	1.83296	1	0.917	6.99843e-34	3	go-brush-border
go-secretory-vesicle	1.33238e-37	1.01805	1	1	1.23232e-33	3	go-secretory-vesicle
go-exocytosis	4.99095e-37	0.858439	1	1	4.61613e-33	3	go-exocytosis
go-cellular-lipid-metabolic-process	5.91551e-37	1.96487	1	0.963	5.47126e-33	3	go-cellular-lipid-metabolic-process
go-lipase-inhibitor-activity	7.58725e-37	1.56927	1	0.818	7.01744e-33	3	go-lipase-inhibitor-activity
go-vacuolar-part1	9.89068e-37	0.764154	1	1	9.14789e-33	3	go-vacuolar-part
go-antibiotic-metabolic-process	1.24362e-36	1.50879	1	0.524	1.15023e-32	3	go-antibiotic-metabolic-process
go-secretory-granule	1.33002e-36	1.01065	1	1	1.23014e-32	3	go-secretory-granule
go-regulation-of-response-to-wounding	1.70084e-36	0.953554	1	0.457	1.57311e-32	3	go-regulation-of-response-to-wounding
go-negative-regulation-of-proteolysis	1.89222e-36	1.53535	1	0.886	1.75011e-32	3	go-negative-regulation-of-proteolysis
go-iron-coordination-entity-transport	2.18178e-36	0.353663	0.933	0.349	2.01793e-32	3	go-iron-coordination-entity-transport
go-cytoplasmic-vesicle-part1	2.22668e-36	0.734374	1	1	2.05946e-32	3	go-cytoplasmic-vesicle-part
go-negative-regulation-of-peptidase-activity	3.17142e-36	1.14024	1	0.402	2.93325e-32	3	go-negative-regulation-of-peptidase-activity
go-plasma-lipoprotein-particle-clearance	3.94855e-36	1.50096	1	0.574	3.65201e-32	3	go-plasma-lipoprotein-particle-clearance
go-carboxylic-ester-hydrolase-activity	5.19134e-36	0.673158	0.907	0.325	4.80147e-32	3	go-carboxylic-ester-hydrolase-activity
go-organophosphate-ester-transport	5.60529e-36	1.409	1	0.754	5.18433e-32	3	go-organophosphate-ester-transport
go-antioxidant-activity	6.60221e-36	1.58646	1	0.986	6.10638e-32	3	go-antioxidant-activity
go-sterol-import	6.9503e-36	1.32123	1	0.836	6.42834e-32	3	go-sterol-import
go-negative-regulation-of-hydrolase-activity	9.71284e-36	1.4261	1	0.967	8.98341e-32	3	go-negative-regulation-of-hydrolase-activity
go-monocarboxylic-acid-metabolic-process	1.10218e-35	2.03288	1	0.942	1.01941e-31	3	go-monocarboxylic-acid-metabolic-process
go-vacuole1	1.22608e-35	0.704818	1	1	1.13401e-31	3	go-vacuole
go-organophosphate-metabolic-process	2.93571e-35	1.08622	1	0.997	2.71524e-31	3	go-organophosphate-metabolic-process
go-cellular-detoxification	4.14011e-35	1.50546	1	0.989	3.82919e-31	3	go-cellular-detoxification
go-sterol-transport	4.99231e-35	1.65049	1	0.661	4.61739e-31	3	go-sterol-transport
go-fatty-acid-binding	5.38536e-35	0.523711	1	0.452	4.98092e-31	3	go-fatty-acid-binding
go-negative-regulation-of-response-to-wounding	6.3339e-35	0.93965	1	0.496	5.85822e-31	3	go-negative-regulation-of-response-to-wounding
go-small-molecule-metabolic-process	6.45379e-35	1.04038	1	1	5.96911e-31	3	go-small-molecule-metabolic-process
go-carbohydrate-metabolic-process	1.31298e-34	0.95018	1	1	1.21437e-30	3	go-carbohydrate-metabolic-process
go-regulation-of-phospholipid-catabolic-process	1.9211e-34	1.01614	0.973	0.598	1.77683e-30	3	go-regulation-of-phospholipid-catabolic-process
go-microvillus	2.40026e-34	1.3961	1	0.791	2.22e-30	3	go-microvillus
go-regulation-of-lipid-biosynthetic-process	3.42764e-34	1.27921	1	0.994	3.17022e-30	3	go-regulation-of-lipid-biosynthetic-process
go-homeostatic-process	3.99318e-34	0.891894	1	1	3.69329e-30	3	go-homeostatic-process
go-cellular-iron-ion-homeostasis	4.10059e-34	0.838466	1	1	3.79263e-30	3	go-cellular-iron-ion-homeostasis
go-protein-homodimerization-activity	4.59001e-34	0.712951	1	1	4.2453e-30	3	go-protein-homodimerization-activity
go-sterol-binding	5.54867e-34	1.31767	1	0.964	5.13196e-30	3	go-sterol-binding
go-peptide-metabolic-process	1.52674e-33	0.803271	1	1	1.41209e-29	3	go-peptide-metabolic-process
go-cluster-of-actin-based-cell-projections	1.66328e-33	1.37954	0.987	0.691	1.53837e-29	3	go-cluster-of-actin-based-cell-projections
go-myeloid-leukocyte-mediated-immunity	1.947e-33	0.767236	1	1	1.80078e-29	3	go-myeloid-leukocyte-mediated-immunity
go-azurophil-granule-lumen	1.99881e-33	0.815059	1	1	1.8487e-29	3	go-azurophil-granule-lumen
go-high-density-lipoprotein-particle-assembly	2.0137e-33	1.3166	1	0.624	1.86247e-29	3	go-high-density-lipoprotein-particle-assembly
go-lipid-binding	2.05164e-33	1.50472	1	0.755	1.89756e-29	3	go-lipid-binding
go-endocytic-vesicle	2.68502e-33	0.832507	1	1	2.48337e-29	3	go-endocytic-vesicle
go-primary-alcohol-metabolic-process	3.31584e-33	0.495229	0.987	0.462	3.06682e-29	3	go-primary-alcohol-metabolic-process
go-renal-absorption	4.69788e-33	0.542747	1	0.501	4.34507e-29	3	go-renal-absorption
go-positive-regulation-of-transport	5.73026e-33	1.20862	1	0.997	5.29991e-29	3	go-positive-regulation-of-transport
go-cell-cell-junction-organization	6.33912e-33	1.2556	1	0.925	5.86305e-29	3	go-cell-cell-junction-organization
go-aryl-sulfotransferase-activity	8.45762e-33	0.454547	0.907	0.387	7.82245e-29	3	go-aryl-sulfotransferase-activity
go-heme-transport	9.39791e-33	0.784518	0.987	0.503	8.69213e-29	3	go-heme-transport
go-organic-acid-metabolic-process	1.14165e-32	1.13019	1	1	1.05591e-28	3	go-organic-acid-metabolic-process
go-low-density-lipoprotein-particle	1.21913e-32	0.579554	1	0.464	1.12758e-28	3	go-low-density-lipoprotein-particle
go-phosphatidylcholine-biosynthetic-process	1.2747e-32	1.24193	1	0.994	1.17897e-28	3	go-phosphatidylcholine-biosynthetic-process
go-endocytosis	1.28361e-32	1.29831	1	0.84	1.18721e-28	3	go-endocytosis
go-platelet-alpha-granule	1.54824e-32	1.37478	1	0.937	1.43197e-28	3	go-platelet-alpha-granule
go-very-low-density-lipoprotein-particle-clearance	1.56518e-32	0.696939	1	0.479	1.44763e-28	3	go-very-low-density-lipoprotein-particle-clearance
go-actin-filament-binding	1.76205e-32	0.945299	1	0.999	1.62972e-28	3	go-actin-filament-binding
go-small-molecule-catabolic-process	1.81846e-32	1.72957	1	0.936	1.68189e-28	3	go-small-molecule-catabolic-process
go-import-into-cell	2.04937e-32	1.27369	1	0.749	1.89546e-28	3	go-import-into-cell
go-steroid-binding	4.90206e-32	0.935161	1	0.528	4.53391e-28	3	go-steroid-binding
go-alcohol-catabolic-process	5.22408e-32	0.27969	0.947	0.46	4.83175e-28	3	go-alcohol-catabolic-process
go-sterol-transporter-activity	6.04805e-32	1.34723	1	0.863	5.59384e-28	3	go-sterol-transporter-activity
go-laminin-complex	7.07066e-32	1.17308	0.987	0.863	6.53965e-28	3	go-laminin-complex
go-myeloid-leukocyte-activation	1.24197e-31	0.903343	1	1	1.14869e-27	3	go-myeloid-leukocyte-activation
go-alcohol-binding	1.36638e-31	0.611591	1	0.541	1.26377e-27	3	go-alcohol-binding
go-endoplasmic-reticulum1	1.53274e-31	0.747648	1	1	1.41764e-27	3	go-endoplasmic-reticulum
go-vacuolar-membrane1	2.16108e-31	0.643999	1	1	1.99878e-27	3	go-vacuolar-membrane
go-cofactor-metabolic-process	2.53292e-31	1.01579	1	1	2.34269e-27	3	go-cofactor-metabolic-process
go-alcohol-metabolic-process	2.59731e-31	1.40103	1	0.866	2.40225e-27	3	go-alcohol-metabolic-process
go-drug-metabolic-process	2.83264e-31	1.40738	1	0.698	2.61991e-27	3	go-drug-metabolic-process
go-purine-containing-compound-metabolic-process	2.91213e-31	1.04543	1	0.99	2.69343e-27	3	go-purine-containing-compound-metabolic-process
go-neurotransmitter-catabolic-process	3.14661e-31	0.516191	0.853	0.34	2.9103e-27	3	go-neurotransmitter-catabolic-process
go-steroid-biosynthetic-process	3.79324e-31	1.40195	1	0.967	3.50837e-27	3	go-steroid-biosynthetic-process
go-protein-localization-to-plasma-membrane	3.94694e-31	0.605275	1	1	3.65053e-27	3	go-protein-localization-to-plasma-membrane
go-vacuolar-lumen1	4.45084e-31	0.901017	1	1	4.11658e-27	3	go-vacuolar-lumen
go-3-phosphoadenosine-5-phosphosulfate-metabolic-process	4.69057e-31	0.694857	0.88	0.389	4.33831e-27	3	go-3-phosphoadenosine-5-phosphosulfate-metabolic-process
go-oxidation-reduction-process	7.23512e-31	0.843181	1	1	6.69177e-27	3	go-oxidation-reduction-process
go-cellular-modified-amino-acid-metabolic-process	9.42229e-31	1.13231	0.987	0.691	8.71468e-27	3	go-cellular-modified-amino-acid-metabolic-process
go-endocytic-vesicle-lumen	1.11791e-30	1.29454	1	0.795	1.03395e-26	3	go-endocytic-vesicle-lumen
go-oxidoreductase-activity	1.44405e-30	0.939109	1	1	1.3356e-26	3	go-oxidoreductase-activity
go-endoplasmic-reticulum-part1	1.46226e-30	0.693919	1	1	1.35244e-26	3	go-endoplasmic-reticulum-part
go-apicolateral-plasma-membrane	1.47333e-30	0.741253	1	0.715	1.36268e-26	3	go-apicolateral-plasma-membrane
go-lipid-modification	1.48244e-30	1.49271	1	0.953	1.37111e-26	3	go-lipid-modification
go-lipid-biosynthetic-process	1.54705e-30	1.14728	1	0.993	1.43086e-26	3	go-lipid-biosynthetic-process
go-bile-acid-metabolic-process	1.64675e-30	0.284178	0.96	0.456	1.52308e-26	3	go-bile-acid-metabolic-process
go-phospholipid-transport	1.80705e-30	1.01893	1	0.608	1.67134e-26	3	go-phospholipid-transport
go-zymogen-activation	1.96484e-30	0.784413	1	0.58	1.81728e-26	3	go-zymogen-activation
go-monocarboxylic-acid-catabolic-process	2.11002e-30	1.48791	1	0.963	1.95156e-26	3	go-monocarboxylic-acid-catabolic-process
go-endosome	2.96295e-30	0.608396	1	1	2.74044e-26	3	go-endosome
go-regulation-of-small-molecule-metabolic-process	3.87267e-30	0.702296	1	1	3.58183e-26	3	go-regulation-of-small-molecule-metabolic-process
go-coated-vesicle-membrane	4.55207e-30	0.60795	1	1	4.21021e-26	3	go-coated-vesicle-membrane
go-sulfur-compound-metabolic-process1	5.21808e-30	1.28652	1	0.989	4.82621e-26	3	go-sulfur-compound-metabolic-process
go-proteolysis	5.58708e-30	0.481568	1	1	5.16749e-26	3	go-proteolysis
go-exogenous-protein-binding	5.82993e-30	0.481433	0.973	0.635	5.39211e-26	3	go-exogenous-protein-binding
go-cell-projection-membrane	6.96532e-30	0.282391	0.96	0.46	6.44223e-26	3	go-cell-projection-membrane
go-nucleoside-bisphosphate-metabolic-process	7.7106e-30	1.60703	0.987	0.838	7.13153e-26	3	go-nucleoside-bisphosphate-metabolic-process
go-modified-amino-acid-binding	9.26945e-30	0.324417	0.933	0.472	8.57332e-26	3	go-modified-amino-acid-binding
go-early-endosome	1.01841e-29	0.713494	1	1	9.41928e-26	3	go-early-endosome
go-leukocyte-mediated-immunity	1.14508e-29	1.1223	1	0.99	1.05909e-25	3	go-leukocyte-mediated-immunity
go-cell-cell-junction-assembly	1.60601e-29	1.11032	1	0.976	1.4854e-25	3	go-cell-cell-junction-assembly
go-organic-acid-catabolic-process	1.62168e-29	1.6536	1	0.942	1.49989e-25	3	go-organic-acid-catabolic-process
go-antibiotic-catabolic-process	1.65867e-29	1.34441	1	0.64	1.53411e-25	3	go-antibiotic-catabolic-process
go-membrane-protein-complex1	1.73021e-29	0.616364	1	1	1.60027e-25	3	go-membrane-protein-complex
go-regulation-of-protein-localization-to-plasma-membrane1	1.7733e-29	0.676835	1	1	1.64013e-25	3	go-regulation-of-protein-localization-to-plasma-membrane
go-very-low-density-lipoprotein-particle-assembly	1.91639e-29	1.37375	1	0.822	1.77247e-25	3	go-very-low-density-lipoprotein-particle-assembly
go-specific-granule	2.01468e-29	1.10719	1	0.969	1.86338e-25	3	go-specific-granule
go-microvillus-membrane	2.07092e-29	0.440859	0.987	0.55	1.91539e-25	3	go-microvillus-membrane
go-monocarboxylic-acid-biosynthetic-process	2.15025e-29	1.10243	0.96	0.58	1.98877e-25	3	go-monocarboxylic-acid-biosynthetic-process
go-cofactor-catabolic-process	2.26756e-29	1.01653	0.973	0.595	2.09727e-25	3	go-cofactor-catabolic-process
go-phospholipid-catabolic-process	2.63441e-29	1.05917	1	0.667	2.43657e-25	3	go-phospholipid-catabolic-process
go-amine-metabolic-process	3.46035e-29	0.756563	1	1	3.20048e-25	3	go-amine-metabolic-process
go-iron-ion-homeostasis	4.31204e-29	0.751409	1	1	3.9882e-25	3	go-iron-ion-homeostasis
go-cholesterol-transporter-activity	4.65144e-29	1.15982	1	0.574	4.30212e-25	3	go-cholesterol-transporter-activity
go-glycerolipid-metabolic-process	5.9668e-29	1.16067	0.987	0.94	5.51869e-25	3	go-glycerolipid-metabolic-process
go-sterol-metabolic-process	6.07028e-29	1.24901	0.987	0.655	5.6144e-25	3	go-sterol-metabolic-process
go-regulation-of-body-fluid-levels	7.15259e-29	0.555295	1	0.533	6.61543e-25	3	go-regulation-of-body-fluid-levels
go-regulation-of-vesicle-mediated-transport	7.28294e-29	0.867324	1	0.999	6.73599e-25	3	go-regulation-of-vesicle-mediated-transport
go-regulation-of-transport	7.83261e-29	1.29712	1	0.862	7.24438e-25	3	go-regulation-of-transport
go-pigment-granule	9.23048e-29	0.495598	1	1	8.53727e-25	3	go-pigment-granule
go-detoxification	1.35884e-28	1.43454	1	0.97	1.25679e-24	3	go-detoxification
go-negative-regulation-of-catalytic-activity	1.50786e-28	0.800812	1	1	1.39462e-24	3	go-negative-regulation-of-catalytic-activity
go-vesicle-membrane1	1.62131e-28	0.709891	1	0.999	1.49955e-24	3	go-vesicle-membrane
go-whole-membrane1	1.70161e-28	0.502257	1	1	1.57382e-24	3	go-whole-membrane
go-fatty-acid-metabolic-process	2.0184e-28	1.61061	1	0.929	1.86681e-24	3	go-fatty-acid-metabolic-process
go-low-density-lipoprotein-particle-clearance	2.43069e-28	1.0127	1	0.88	2.24815e-24	3	go-low-density-lipoprotein-particle-clearance
go-clathrin-coated-vesicle-membrane	3.0372e-28	0.885134	1	0.927	2.8091e-24	3	go-clathrin-coated-vesicle-membrane
go-exopeptidase-activity	3.37174e-28	0.570001	0.973	0.641	3.11852e-24	3	go-exopeptidase-activity
go-positive-regulation-of-establishment-of-protein-localization	3.44325e-28	0.684297	1	1	3.18466e-24	3	go-positive-regulation-of-establishment-of-protein-localization
go-peptidase-activity	4.05138e-28	0.789547	1	0.634	3.74712e-24	3	go-peptidase-activity
go-oxidoreductase-activity-acting-on-ch-oh-group-of-donors	4.12241e-28	1.26808	1	0.989	3.81282e-24	3	go-oxidoreductase-activity-acting-on-ch-oh-group-of-donors
go-fatty-acid-catabolic-process	5.66039e-28	1.14196	1	0.977	5.23529e-24	3	go-fatty-acid-catabolic-process
go-identical-protein-binding	7.82e-28	0.404795	1	1	7.23272e-24	3	go-identical-protein-binding
go-secondary-alcohol-metabolic-process	1.01695e-27	1.25983	1	0.796	9.40578e-24	3	go-secondary-alcohol-metabolic-process
go-lipoprotein-particle-receptor-binding1	1.03484e-27	0.952652	1	0.996	9.57123e-24	3	go-lipoprotein-particle-receptor-binding
go-clathrin-coated-vesicle	1.05965e-27	1.00325	1	0.986	9.80067e-24	3	go-clathrin-coated-vesicle
go-carbohydrate-derivative-transport	1.07393e-27	1.11849	1	0.953	9.93281e-24	3	go-carbohydrate-derivative-transport
go-monosaccharide-catabolic-process	1.21426e-27	0.575714	0.973	0.687	1.12307e-23	3	go-monosaccharide-catabolic-process
go-branching-involved-in-labyrinthine-layer-morphogenesis	1.29718e-27	0.36168	1	0.608	1.19976e-23	3	go-branching-involved-in-labyrinthine-layer-morphogenesis
go-cell-activation-involved-in-immune-response	1.79804e-27	0.752129	1	1	1.663e-23	3	go-cell-activation-involved-in-immune-response
go-coated-vesicle	2.02419e-27	0.570203	1	1	1.87218e-23	3	go-coated-vesicle
go-cellular-chemical-homeostasis	2.42217e-27	0.348105	0.987	0.473	2.24027e-23	3	go-cellular-chemical-homeostasis
go-positive-regulation-of-catabolic-process	2.51947e-27	0.455314	1	1	2.33026e-23	3	go-positive-regulation-of-catabolic-process
go-monosaccharide-metabolic-process	2.56345e-27	1.25108	1	0.979	2.37094e-23	3	go-monosaccharide-metabolic-process
go-carbohydrate-catabolic-process	2.92038e-27	0.692153	1	1	2.70106e-23	3	go-carbohydrate-catabolic-process
go-regulation-of-fatty-acid-biosynthetic-process	3.78849e-27	0.498038	0.973	0.598	3.50397e-23	3	go-regulation-of-fatty-acid-biosynthetic-process
go-organic-hydroxy-compound-biosynthetic-process	3.79583e-27	1.20365	1	0.922	3.51076e-23	3	go-organic-hydroxy-compound-biosynthetic-process
go-response-to-toxic-substance1	4.3994e-27	1.19076	1	0.96	4.06901e-23	3	go-response-to-toxic-substance
go-regulation-of-peptidase-activity	4.96229e-27	1.21542	1	0.949	4.58962e-23	3	go-regulation-of-peptidase-activity
go-amino-acid-binding	5.28172e-27	0.489375	0.947	0.584	4.88506e-23	3	go-amino-acid-binding
go-vitamin-binding	5.71348e-27	0.513381	0.92	0.49	5.2844e-23	3	go-vitamin-binding
go-cellular-transition-metal-ion-homeostasis	7.35141e-27	0.607073	1	1	6.79932e-23	3	go-cellular-transition-metal-ion-homeostasis
go-heme-transporter-activity	8.13172e-27	0.358044	0.947	0.593	7.52103e-23	3	go-heme-transporter-activity
go-molecular-function-regulator	8.76756e-27	1.10059	1	0.769	8.10912e-23	3	go-molecular-function-regulator
go-nucleoside-phosphate-metabolic-process	1.18033e-26	0.820085	1	0.997	1.09169e-22	3	go-nucleoside-phosphate-metabolic-process
go-interaction-with-symbiont	1.2082e-26	0.604029	1	1	1.11746e-22	3	go-interaction-with-symbiont
go-azurophil-granule-membrane	1.2082e-26	0.55085	1	1	1.11746e-22	3	go-azurophil-granule-membrane
go-positive-regulation-of-nad-p-h-oxidase-activity	1.30729e-26	0.820995	0.987	0.95	1.20912e-22	3	go-positive-regulation-of-nad-p-h-oxidase-activity
go-regulation-of-amyloid-beta-formation	1.80174e-26	0.804332	1	0.963	1.66643e-22	3	go-regulation-of-amyloid-beta-formation
go-carbohydrate-transport	1.87661e-26	0.461203	0.907	0.452	1.73568e-22	3	go-carbohydrate-transport
go-glycolipid-catabolic-process	1.90334e-26	0.439544	0.987	0.722	1.7604e-22	3	go-glycolipid-catabolic-process
go-regulation-of-amyloid-precursor-protein-catabolic-process	1.97622e-26	0.822643	1	0.96	1.82781e-22	3	go-regulation-of-amyloid-precursor-protein-catabolic-process
go-alpha-amino-acid-catabolic-process	2.03368e-26	1.0016	0.96	0.648	1.88095e-22	3	go-alpha-amino-acid-catabolic-process
go-phospholipid-metabolic-process	2.1178e-26	0.633624	0.973	0.745	1.95876e-22	3	go-phospholipid-metabolic-process
go-regulation-of-steroid-metabolic-process	2.1492e-26	1.09753	1	0.99	1.9878e-22	3	go-regulation-of-steroid-metabolic-process
go-negative-regulation-of-receptor-signaling-pathway-via-stat	2.44119e-26	0.780628	1	0.981	2.25786e-22	3	go-negative-regulation-of-receptor-signaling-pathway-via-stat
go-cell-junction-organization	2.48468e-26	0.667849	1	1	2.29808e-22	3	go-cell-junction-organization
go-lipase-activator-activity	2.9482e-26	0.604495	0.973	0.765	2.72679e-22	3	go-lipase-activator-activity
go-amine-catabolic-process	3.3975e-26	0.518829	0.947	0.547	3.14235e-22	3	go-amine-catabolic-process
go-transition-metal-ion-transport	3.45588e-26	0.704262	1	1	3.19634e-22	3	go-transition-metal-ion-transport
go-iron-ion-transport	3.49606e-26	0.79194	1	1	3.23351e-22	3	go-iron-ion-transport
go-lipid-storage	3.6196e-26	0.941011	1	0.906	3.34777e-22	3	go-lipid-storage
go-hexose-catabolic-process	3.79292e-26	0.437789	0.987	0.731	3.50807e-22	3	go-hexose-catabolic-process
go-regulation-of-endocytosis	3.92422e-26	0.666659	1	0.999	3.62951e-22	3	go-regulation-of-endocytosis
go-microbody-lumen	4.26069e-26	1.20463	1	0.953	3.94071e-22	3	go-microbody-lumen
go-cellular-biogenic-amine-metabolic-process	4.6355e-26	0.883293	0.973	0.701	4.28738e-22	3	go-cellular-biogenic-amine-metabolic-process
go-positive-regulation-of-protein-localization-to-membrane	6.90048e-26	0.698639	1	1	6.38226e-22	3	go-positive-regulation-of-protein-localization-to-membrane
go-regulation-of-hydrolase-activity	7.30843e-26	0.601566	1	1	6.75957e-22	3	go-regulation-of-hydrolase-activity
go-negative-regulation-of-amyloid-precursor-protein-catabolic-process	8.27282e-26	0.798189	1	0.899	7.65153e-22	3	go-negative-regulation-of-amyloid-precursor-protein-catabolic-process
go-protein-dimerization-activity	9.73551e-26	0.575288	1	1	9.00437e-22	3	go-protein-dimerization-activity
go-positive-regulation-of-protein-exit-from-endoplasmic-reticulum	1.06064e-25	0.888242	1	0.983	9.80989e-22	3	go-positive-regulation-of-protein-exit-from-endoplasmic-reticulum
go-regulation-of-receptor-mediated-endocytosis	1.12977e-25	0.978199	1	0.997	1.04493e-21	3	go-regulation-of-receptor-mediated-endocytosis
go-fatty-acid-biosynthetic-process	1.46961e-25	0.864023	0.96	0.688	1.35924e-21	3	go-fatty-acid-biosynthetic-process
go-modification-of-morphology-or-physiology-of-other-organism	1.619e-25	0.932651	1	0.994	1.49741e-21	3	go-modification-of-morphology-or-physiology-of-other-organism
go-electron-transfer-activity	2.17695e-25	0.479712	1	1	2.01346e-21	3	go-electron-transfer-activity
go-response-to-steroid-hormone	2.23973e-25	0.823457	1	1	2.07152e-21	3	go-response-to-steroid-hormone
go-glutathione-metabolic-process1	2.48939e-25	1.12844	1	0.962	2.30243e-21	3	go-glutathione-metabolic-process
go-pyridine-containing-compound-biosynthetic-process	2.54827e-25	0.253627	0.893	0.524	2.35689e-21	3	go-pyridine-containing-compound-biosynthetic-process
go-triglyceride-metabolic-process	2.71032e-25	0.672173	0.987	0.661	2.50677e-21	3	go-triglyceride-metabolic-process
go-regulation-of-cellular-ketone-metabolic-process	2.76354e-25	0.530749	1	1	2.556e-21	3	go-regulation-of-cellular-ketone-metabolic-process
go-positive-regulation-by-host-of-viral-process	2.85924e-25	0.737546	1	1	2.64451e-21	3	go-positive-regulation-by-host-of-viral-process
go-organic-acid-biosynthetic-process	3.31955e-25	1.44428	1	0.954	3.07025e-21	3	go-organic-acid-biosynthetic-process
go-dicarboxylic-acid-biosynthetic-process	3.4372e-25	0.578853	0.933	0.654	3.17907e-21	3	go-dicarboxylic-acid-biosynthetic-process
go-nuclear-outer-membrane-endoplasmic-reticulum-membrane-network	3.46692e-25	0.533835	1	1	3.20655e-21	3	go-nuclear-outer-membrane-endoplasmic-reticulum-membrane-network
go-secretory-granule-membrane	3.4866e-25	0.843989	1	0.997	3.22476e-21	3	go-secretory-granule-membrane
go-response-to-organophosphorus	3.55372e-25	0.50086	0.973	0.524	3.28684e-21	3	go-response-to-organophosphorus
go-carbohydrate-derivative-metabolic-process1	3.73168e-25	0.61203	1	0.997	3.45143e-21	3	go-carbohydrate-derivative-metabolic-process
go-glutathione-peroxidase-activity	4.20233e-25	1.06421	1	1	3.88674e-21	3	go-glutathione-peroxidase-activity
go-lipid-oxidation	4.37056e-25	1.10729	1	0.98	4.04233e-21	3	go-lipid-oxidation
go-immune-effector-process1	4.47187e-25	0.997591	1	0.999	4.13603e-21	3	go-immune-effector-process
go-small-molecule-biosynthetic-process	5.5105e-25	0.92672	1	1	5.09666e-21	3	go-small-molecule-biosynthetic-process
go-cell-cell-junction1	6.06467e-25	0.863164	1	0.999	5.60921e-21	3	go-cell-cell-junction
go-fatty-acid-beta-oxidation	6.30807e-25	0.962863	1	0.987	5.83434e-21	3	go-fatty-acid-beta-oxidation
go-apolipoprotein-binding	6.32787e-25	0.620591	0.987	0.657	5.85265e-21	3	go-apolipoprotein-binding
go-response-to-camp	6.54379e-25	0.838701	1	0.668	6.05235e-21	3	go-response-to-camp
go-positive-regulation-of-protein-catabolic-process-in-the-vacuole	6.75901e-25	0.700528	0.88	0.442	6.25141e-21	3	go-positive-regulation-of-protein-catabolic-process-in-the-vacuole
go-amyloid-beta-clearance	7.22107e-25	0.89129	1	0.999	6.67876e-21	3	go-amyloid-beta-clearance
go-cofactor-transport	7.92034e-25	0.547012	0.96	0.621	7.32552e-21	3	go-cofactor-transport
go-toll-like-receptor-signaling-pathway	8.28356e-25	0.651835	1	0.813	7.66146e-21	3	go-toll-like-receptor-signaling-pathway
go-hepaticobiliary-system-development	8.7416e-25	0.775001	1	0.999	8.08511e-21	3	go-hepaticobiliary-system-development
go-phospholipid-binding	9.29738e-25	0.934888	1	0.986	8.59915e-21	3	go-phospholipid-binding
go-positive-regulation-of-immune-response	1.01207e-24	0.351582	0.987	0.426	9.36061e-21	3	go-positive-regulation-of-immune-response
go-response-to-muscle-stretch	1.12065e-24	0.263982	0.987	0.678	1.03649e-20	3	go-response-to-muscle-stretch
go-response-to-metal-ion1	1.13146e-24	0.914142	1	0.999	1.04649e-20	3	go-response-to-metal-ion
go-protein-localization-to-membrane	1.18331e-24	0.474055	1	1	1.09444e-20	3	go-protein-localization-to-membrane
go-thioester-metabolic-process	1.28178e-24	1.06076	0.973	0.778	1.18552e-20	3	go-thioester-metabolic-process
go-positive-regulation-of-protein-localization-to-cell-periphery	1.30144e-24	0.956853	1	0.997	1.2037e-20	3	go-positive-regulation-of-protein-localization-to-cell-periphery
go-cellular-carbohydrate-metabolic-process	1.58117e-24	1.06292	1	0.923	1.46242e-20	3	go-cellular-carbohydrate-metabolic-process
go-regulation-of-protein-localization-to-membrane1	1.58266e-24	0.542775	1	1	1.4638e-20	3	go-regulation-of-protein-localization-to-membrane
go-acylglycerol-o-acyltransferase-activity	1.62585e-24	0.718582	0.987	0.756	1.50375e-20	3	go-acylglycerol-o-acyltransferase-activity
go-porphyrin-containing-compound-metabolic-process	1.73398e-24	0.526922	0.933	0.702	1.60376e-20	3	go-porphyrin-containing-compound-metabolic-process
go-regulation-of-sodium-ion-transport	1.81426e-24	0.623962	1	0.92	1.67801e-20	3	go-regulation-of-sodium-ion-transport
go-actin-based-cell-projection1	2.31131e-24	1.04023	1	0.979	2.13773e-20	3	go-actin-based-cell-projection
go-tertiary-granule1	2.58424e-24	0.872055	1	0.997	2.39016e-20	3	go-tertiary-granule
go-hydrolase-activity-acting-on-glycosyl-bonds	2.75657e-24	0.254881	0.907	0.604	2.54955e-20	3	go-hydrolase-activity-acting-on-glycosyl-bonds
go-organonitrogen-compound-catabolic-process	3.85331e-24	0.331909	1	1	3.56392e-20	3	go-organonitrogen-compound-catabolic-process
go-dicarboxylic-acid-catabolic-process	4.10272e-24	0.462894	0.973	0.741	3.79461e-20	3	go-dicarboxylic-acid-catabolic-process
go-protein-catabolic-process-in-the-vacuole	4.58611e-24	0.891408	1	0.957	4.2417e-20	3	go-protein-catabolic-process-in-the-vacuole
go-cellular-ketone-metabolic-process	5.33975e-24	0.530179	1	1	4.93873e-20	3	go-cellular-ketone-metabolic-process
go-phospholipid-homeostasis	6.26078e-24	0.315818	0.947	0.553	5.7906e-20	3	go-phospholipid-homeostasis
go-vitamin-b6-binding	6.60539e-24	0.304131	0.947	0.597	6.10932e-20	3	go-vitamin-b6-binding
go-regulation-of-receptor-catabolic-process	7.50761e-24	0.653152	1	0.97	6.94379e-20	3	go-regulation-of-receptor-catabolic-process
go-negative-regulation-of-sodium-ion-transport	7.82442e-24	0.429269	1	0.853	7.2368e-20	3	go-negative-regulation-of-sodium-ion-transport
go-pyruvate-metabolic-process	8.16158e-24	0.930157	1	1	7.54865e-20	3	go-pyruvate-metabolic-process
go-response-to-fatty-acid	8.68042e-24	0.275852	0.973	0.668	8.02852e-20	3	go-response-to-fatty-acid
go-xenobiotic-catabolic-process	9.85316e-24	0.493061	0.987	0.687	9.11319e-20	3	go-xenobiotic-catabolic-process
go-generation-of-precursor-metabolites-and-energy	1.03358e-23	0.434188	1	1	9.55958e-20	3	go-generation-of-precursor-metabolites-and-energy
go-modification-of-morphology-or-physiology-of-other-organism-involved-in-symbiotic-interaction	1.05073e-23	0.519838	1	1	9.71821e-20	3	go-modification-of-morphology-or-physiology-of-other-organism-involved-in-symbiotic-interaction
go-positive-regulation-of-protein-glycosylation	1.14545e-23	0.456648	0.96	0.759	1.05943e-19	3	go-positive-regulation-of-protein-glycosylation
go-endocytic-vesicle-membrane	1.28684e-23	0.868996	1	0.989	1.1902e-19	3	go-endocytic-vesicle-membrane
go-estrogen-metabolic-process	1.3522e-23	0.595299	0.973	0.83	1.25065e-19	3	go-estrogen-metabolic-process
go-response-to-organic-cyclic-compound1	1.45153e-23	0.716934	1	1	1.34252e-19	3	go-response-to-organic-cyclic-compound
go-regulation-of-proteolysis	1.48362e-23	0.589097	1	1	1.3722e-19	3	go-regulation-of-proteolysis
go-enzyme-regulator-activity	1.58419e-23	0.481017	1	1	1.46521e-19	3	go-enzyme-regulator-activity
go-response-to-drug	1.61981e-23	0.998706	1	0.925	1.49816e-19	3	go-response-to-drug
go-positive-regulation-of-exocytosis	1.6551e-23	0.689313	1	0.89	1.5308e-19	3	go-positive-regulation-of-exocytosis
go-response-to-hormone1	1.97069e-23	0.638255	1	1	1.82269e-19	3	go-response-to-hormone
go-regulation-of-protein-catabolic-process-in-the-vacuole	1.9982e-23	0.771348	0.987	0.915	1.84813e-19	3	go-regulation-of-protein-catabolic-process-in-the-vacuole
go-leading-edge-membrane	2.00922e-23	0.4451	1	0.845	1.85832e-19	3	go-leading-edge-membrane
go-transition-metal-ion-homeostasis	2.2096e-23	0.553519	1	1	2.04366e-19	3	go-transition-metal-ion-homeostasis
go-fatty-acid-derivative-biosynthetic-process	2.43793e-23	0.628678	0.947	0.735	2.25484e-19	3	go-fatty-acid-derivative-biosynthetic-process
go-regulation-of-sodium-ion-transmembrane-transporter-activity	2.62657e-23	0.543677	1	0.915	2.42932e-19	3	go-regulation-of-sodium-ion-transmembrane-transporter-activity
go-establishment-or-maintenance-of-cytoskeleton-polarity	2.76168e-23	0.917668	1	0.994	2.55428e-19	3	go-establishment-or-maintenance-of-cytoskeleton-polarity
go-regulation-of-mapk-cascade	2.85729e-23	0.493828	0.96	0.634	2.64271e-19	3	go-regulation-of-mapk-cascade
go-fructose-1-6-bisphosphate-metabolic-process	4.03681e-23	0.353464	0.96	0.682	3.73365e-19	3	go-fructose-1-6-bisphosphate-metabolic-process
go-glycerolipid-biosynthetic-process	4.08099e-23	0.822972	1	0.996	3.77451e-19	3	go-glycerolipid-biosynthetic-process
go-acetylglucosaminyltransferase-activity	4.47423e-23	0.417106	0.907	0.741	4.13821e-19	3	go-acetylglucosaminyltransferase-activity
go-labyrinthine-layer-development	4.67754e-23	0.551319	1	0.862	4.32626e-19	3	go-labyrinthine-layer-development
go-establishment-or-maintenance-of-actin-cytoskeleton-polarity	4.98459e-23	0.90268	1	0.987	4.61025e-19	3	go-establishment-or-maintenance-of-actin-cytoskeleton-polarity
go-regulation-of-hormone-metabolic-process	5.01673e-23	0.320632	1	0.782	4.63997e-19	3	go-regulation-of-hormone-metabolic-process
go-activation-of-immune-response	5.02288e-23	0.798478	1	0.571	4.64566e-19	3	go-activation-of-immune-response
go-alpha-catenin-binding	5.68576e-23	0.671484	1	0.954	5.25876e-19	3	go-alpha-catenin-binding
go-negative-regulation-of-lipase-activity	5.79246e-23	0.302186	1	0.648	5.35744e-19	3	go-negative-regulation-of-lipase-activity
go-coenzyme-binding	5.82944e-23	0.971424	1	0.989	5.39165e-19	3	go-coenzyme-binding
[truncated: 4,514 more rows]

## Sheet: table s3-3 pathway-based_FC-DEF
	p_val	avg_log2FC	pct.1	pct.2	p_val_adj	cluster	gene
reactome-regulation-of-signaling-by-nodal	6.09539e-36	0.611249	0.613	0.199	8.42384e-33	0	reactome-regulation-of-signaling-by-nodal
reactome-signaling-by-nodal	1.11682e-34	0.928343	0.896	0.474	1.54345e-31	0	reactome-signaling-by-nodal
reactome-transcriptional-regulation-of-pluripotent-stem-cells	4.54957e-24	0.327196	0.908	0.469	6.28751e-21	0	reactome-transcriptional-regulation-of-pluripotent-stem-cells
reactome-fgfr2-alternative-splicing	6.11889e-22	0.31905	1	1	8.45631e-19	0	reactome-fgfr2-alternative-splicing
reactome-generic-transcription-pathway	3.36295e-21	0.380619	1	1	4.6476e-18	0	reactome-generic-transcription-pathway
reactome-gene-expression-transcription	1.438e-20	0.292462	1	1	1.98732e-17	0	reactome-gene-expression-transcription
reactome-signaling-by-wnt-in-cancer	4.67418e-17	0.744188	0.988	0.997	6.45972e-14	0	reactome-signaling-by-wnt-in-cancer
reactome-sumo-is-transferred-from-e1-to-e2-ube2i-ubc9	9.8453e-17	0.443085	1	0.988	1.36062e-13	0	reactome-sumo-is-transferred-from-e1-to-e2-ube2i-ubc9
reactome-deactivation-of-the-beta-catenin-transactivating-complex	1.71969e-16	0.870366	1	0.992	2.37662e-13	0	reactome-deactivation-of-the-beta-catenin-transactivating-complex
reactome-signaling-by-bmp	2.38882e-16	1.03573	0.942	0.811	3.30135e-13	0	reactome-signaling-by-bmp
reactome-signaling-by-fgfr	9.50542e-16	0.323525	1	1	1.31365e-12	0	reactome-signaling-by-fgfr
reactome-apoptotic-cleavage-of-cell-adhesion-proteins	2.47839e-14	0.670729	0.977	0.894	3.42514e-11	0	reactome-apoptotic-cleavage-of-cell-adhesion-proteins
reactome-sumoylation-of-dna-methylation-proteins	3.2754e-14	0.630694	0.983	0.921	4.5266e-11	0	reactome-sumoylation-of-dna-methylation-proteins
reactome-signaling-by-tgf-beta-family-members	6.09814e-14	0.27253	1	1	8.42763e-11	0	reactome-signaling-by-tgf-beta-family-members
reactome-influenza-infection	8.94952e-14	0.66228	0.96	0.897	1.23682e-10	0	reactome-influenza-infection
reactome-apobec3g-mediated-resistance-to-hiv-1-infection	2.36593e-13	0.725538	0.965	0.897	3.26971e-10	0	reactome-apobec3g-mediated-resistance-to-hiv-1-infection
reactome-scavenging-by-class-a-receptors	3.53797e-13	0.865997	0.994	0.863	4.88948e-10	0	reactome-scavenging-by-class-a-receptors
reactome-mrna-decay-by-5-to-3-exoribonuclease	7.63933e-13	0.362625	1	0.995	1.05576e-09	0	reactome-mrna-decay-by-5-to-3-exoribonuclease
reactome-nuclear-signaling-by-erbb4	9.0701e-13	0.267009	0.89	0.687	1.25349e-09	0	reactome-nuclear-signaling-by-erbb4
reactome-gluconeogenesis	1.13298e-12	0.649458	1	1	1.56578e-09	0	reactome-gluconeogenesis
reactome-transcriptional-regulation-by-the-ap-2-tfap2-family-of-transcription-factors	7.61253e-12	0.60507	0.988	0.921	1.05205e-08	0	reactome-transcriptional-regulation-by-the-ap-2-tfap2-family-of-transcription-factors
reactome-integration-of-provirus	8.10508e-12	0.407354	1	0.998	1.12012e-08	0	reactome-integration-of-provirus
reactome-downregulation-of-erbb4-signaling	1.51168e-11	0.605213	1	0.997	2.08914e-08	0	reactome-downregulation-of-erbb4-signaling
reactome-protein-methylation	1.67588e-11	0.937327	1	0.997	2.31606e-08	0	reactome-protein-methylation
reactome-2-ltr-circle-formation	2.29239e-11	0.601303	0.994	0.99	3.16808e-08	0	reactome-2-ltr-circle-formation
reactome-wnt5a-dependent-internalization-of-fzd2-fzd5-and-ror2	5.8332e-11	0.599862	0.994	0.995	8.06149e-08	0	reactome-wnt5a-dependent-internalization-of-fzd2-fzd5-and-ror2
reactome-scavenging-by-class-f-receptors	8.93308e-11	0.614845	0.977	0.992	1.23455e-07	0	reactome-scavenging-by-class-f-receptors
reactome-regulation-of-glycolysis-by-fructose-2-6-bisphosphate-metabolism	5.67138e-10	0.309586	0.913	0.876	7.83785e-07	0	reactome-regulation-of-glycolysis-by-fructose-2-6-bisphosphate-metabolism
reactome-plasma-lipoprotein-clearance	7.75048e-10	0.33991	0.994	0.972	1.07112e-06	0	reactome-plasma-lipoprotein-clearance
reactome-chaperone-mediated-autophagy	8.18629e-10	0.49708	1	0.997	1.13135e-06	0	reactome-chaperone-mediated-autophagy
reactome-disassembly-of-the-destruction-complex-and-recruitment-of-axin-to-the-membrane	1.27744e-09	0.666736	0.988	0.982	1.76542e-06	0	reactome-disassembly-of-the-destruction-complex-and-recruitment-of-axin-to-the-membrane
reactome-tgf-beta-receptor-signaling-in-emt-epithelial-to-mesenchymal-transition	2.34593e-09	0.469644	1	0.998	3.24208e-06	0	reactome-tgf-beta-receptor-signaling-in-emt-epithelial-to-mesenchymal-transition
reactome-rho-gtpases-activate-ktn1	2.79811e-09	0.50724	1	0.998	3.86698e-06	0	reactome-rho-gtpases-activate-ktn1
reactome-serine-biosynthesis	3.59955e-09	0.642163	0.965	0.97	4.97458e-06	0	reactome-serine-biosynthesis
reactome-rho-gtpases-activate-rhotekin-and-rhophilins	3.92651e-09	0.316624	0.931	0.849	5.42644e-06	0	reactome-rho-gtpases-activate-rhotekin-and-rhophilins
reactome-early-phase-of-hiv-life-cycle	5.92263e-09	0.55287	1	0.993	8.18508e-06	0	reactome-early-phase-of-hiv-life-cycle
reactome-defective-ext2-causes-exostoses-2	2.12682e-08	0.379857	0.798	0.656	2.93926e-05	0	reactome-defective-ext2-causes-exostoses-2
reactome-bbsome-mediated-cargo-targeting-to-cilium	2.16583e-08	0.593108	0.994	0.992	2.99318e-05	0	reactome-bbsome-mediated-cargo-targeting-to-cilium
reactome-signaling-by-ntrk2-trkb	2.46363e-08	0.405942	0.942	0.909	3.40473e-05	0	reactome-signaling-by-ntrk2-trkb
reactome-activation-of-the-mrna-upon-binding-of-the-cap-binding-complex-and-eifs-and-subsequent-binding-to-43s	3.50259e-08	0.324278	1	0.993	4.84058e-05	0	reactome-activation-of-the-mrna-upon-binding-of-the-cap-binding-complex-and-eifs-and-subsequent-binding-to-43s
reactome-insulin-processing	3.70154e-08	0.406068	0.844	0.816	5.11553e-05	0	reactome-insulin-processing
reactome-regulation-of-expression-of-slits-and-robos	5.60215e-08	0.339782	0.971	0.902	7.74217e-05	0	reactome-regulation-of-expression-of-slits-and-robos
reactome-inla-mediated-entry-of-listeria-monocytogenes-into-host-cells	8.69287e-08	0.387608	1	1	0.000120135	0	reactome-inla-mediated-entry-of-listeria-monocytogenes-into-host-cells
reactome-downregulation-of-erbb2-signaling	2.55678e-07	0.508526	0.954	0.927	0.000353347	0	reactome-downregulation-of-erbb2-signaling
reactome-downregulation-of-erbb2:erbb3-signaling	3.12331e-07	0.428867	0.983	0.983	0.000431642	0	reactome-downregulation-of-erbb2:erbb3-signaling
reactome-pi5p-regulates-tp53-acetylation	3.81682e-07	0.428868	0.786	0.767	0.000527484	0	reactome-pi5p-regulates-tp53-acetylation
reactome-signaling-by-robo-receptors	1.04681e-06	0.31841	1	0.993	0.00144669	0	reactome-signaling-by-robo-receptors
reactome-receptor-mediated-mitophagy	2.43403e-06	0.411991	0.988	0.995	0.00336382	0	reactome-receptor-mediated-mitophagy
reactome-shc-related-events-triggered-by-igf1r	3.45144e-06	0.272033	0.971	0.982	0.00476989	0	reactome-shc-related-events-triggered-by-igf1r
reactome-nef-mediated-downregulation-of-mhc-class-i-complex-cell-surface-expression	4.58312e-06	0.286126	0.902	0.914	0.00633387	0	reactome-nef-mediated-downregulation-of-mhc-class-i-complex-cell-surface-expression
reactome-cargo-trafficking-to-the-periciliary-membrane	1.19048e-05	0.34563	0.994	0.997	0.0164525	0	reactome-cargo-trafficking-to-the-periciliary-membrane
reactome-basigin-interactions	1.38693e-05	0.471971	0.965	0.982	0.0191673	0	reactome-basigin-interactions
reactome-beta-catenin-phosphorylation-cascade	1.49011e-05	0.290118	1	0.993	0.0205933	0	reactome-beta-catenin-phosphorylation-cascade
reactome-hsf1-activation	1.8195e-05	0.304577	1	1	0.0251455	0	reactome-hsf1-activation
reactome-intraflagellar-transport	0.000122123	0.276894	1	0.998	0.168774	0	reactome-intraflagellar-transport
reactome-regulation-of-tp53-activity-through-methylation	0.000199197	0.297186	1	0.998	0.27529	0	reactome-regulation-of-tp53-activity-through-methylation
reactome-branched-chain-amino-acid-catabolism	0.000556665	0.271704	0.954	0.978	0.769312	0	reactome-branched-chain-amino-acid-catabolism
reactome-vxpx-cargo-targeting-to-cilium	0.000749722	0.255043	0.948	0.962	1	0	reactome-vxpx-cargo-targeting-to-cilium
reactome-erythropoietin-activates-ras	0.00287327	0.352052	0.85	0.909	1	0	reactome-erythropoietin-activates-ras
reactome-translesion-synthesis-by-polh	0.00367987	0.344521	0.994	0.987	1	0	reactome-translesion-synthesis-by-polh
reactome-interleukin-4-and-interleukin-13-signaling	6.05316e-72	1.61624	0.983	0.201	8.36547e-69	1	reactome-interleukin-4-and-interleukin-13-signaling
reactome-interferon-alpha-beta-signaling	6.33871e-69	1.51236	0.901	0.155	8.76009e-66	1	reactome-interferon-alpha-beta-signaling
reactome-cytokine-signaling-in-immune-system	1.37836e-61	2.21676	1	0.983	1.90489e-58	1	reactome-cytokine-signaling-in-immune-system
reactome-signaling-by-interleukins	1.39895e-59	2.05984	1	0.982	1.93335e-56	1	reactome-signaling-by-interleukins
reactome-adaptive-immune-system	5.09647e-57	0.921622	1	1	7.04333e-54	1	reactome-adaptive-immune-system
reactome-interleukin-1-family-signaling	2.29774e-53	0.746982	1	1	3.17548e-50	1	reactome-interleukin-1-family-signaling
reactome-interleukin-1-signaling	7.23983e-53	0.631619	1	1	1.00054e-49	1	reactome-interleukin-1-signaling
reactome-c-type-lectin-receptors-clrs	6.79043e-52	0.695286	1	1	9.38437e-49	1	reactome-c-type-lectin-receptors-clrs
reactome-integrin-cell-surface-interactions	1.18132e-51	1.41262	0.893	0.244	1.63259e-48	1	reactome-integrin-cell-surface-interactions
reactome-toll-like-receptor-4-tlr4-cascade	7.00931e-50	2.25481	1	0.927	9.68686e-47	1	reactome-toll-like-receptor-4-tlr4-cascade
reactome-innate-immune-system	8.24491e-49	1.26772	1	1	1.13945e-45	1	reactome-innate-immune-system
reactome-vegf-ligand-receptor-interactions	3.34591e-48	0.443434	0.826	0.22	4.62405e-45	1	reactome-vegf-ligand-receptor-interactions
reactome-clec7a-dectin-1-signaling	5.15227e-48	0.544757	1	1	7.12043e-45	1	reactome-clec7a-dectin-1-signaling
reactome-signaling-by-the-b-cell-receptor-bcr	6.92975e-48	1.67692	1	0.998	9.57691e-45	1	reactome-signaling-by-the-b-cell-receptor-bcr
reactome-nucleotide-binding-domain-leucine-rich-repeat-containing-receptor-nlr-signaling-pathways	2.56516e-47	2.38683	1	0.925	3.54505e-44	1	reactome-nucleotide-binding-domain-leucine-rich-repeat-containing-receptor-nlr-signaling-pathways
reactome-interferon-signaling	8.46551e-47	1.41665	1	1	1.16993e-43	1	reactome-interferon-signaling
reactome-degradation-of-the-extracellular-matrix	4.10008e-46	0.908084	0.769	0.177	5.66632e-43	1	reactome-degradation-of-the-extracellular-matrix
reactome-cellular-responses-to-external-stimuli	1.11726e-45	0.374318	1	1	1.54406e-42	1	reactome-cellular-responses-to-external-stimuli
reactome-foxo-mediated-transcription	3.42285e-45	2.05908	1	0.938	4.73038e-42	1	reactome-foxo-mediated-transcription
reactome-platelet-activation-signaling-and-aggregation	4.81803e-45	1.64752	1	0.96	6.65852e-42	1	reactome-platelet-activation-signaling-and-aggregation
reactome-toll-like-receptor-tlr1:tlr2-cascade	1.84603e-44	1.97184	1	0.945	2.55122e-41	1	reactome-toll-like-receptor-tlr1:tlr2-cascade
reactome-extracellular-matrix-organization	5.20092e-44	1.33619	0.934	0.253	7.18767e-41	1	reactome-extracellular-matrix-organization
reactome-trif-ticam1-mediated-tlr4-signaling	2.69528e-43	1.38484	1	0.994	3.72488e-40	1	reactome-trif-ticam1-mediated-tlr4-signaling
reactome-circadian-clock	5.53733e-43	1.11395	1	0.998	7.65259e-40	1	reactome-circadian-clock
reactome-toll-like-receptor-cascades	1.2633e-42	1.92139	1	0.938	1.74588e-39	1	reactome-toll-like-receptor-cascades
reactome-antigen-presentation:-folding-assembly-and-peptide-loading-of-class-i-mhc	3.58072e-42	1.27029	1	1	4.94856e-39	1	reactome-antigen-presentation:-folding-assembly-and-peptide-loading-of-class-i-mhc
reactome-ddx58-ifih1-mediated-induction-of-interferon-alpha-beta	5.29528e-42	2.1568	1	0.982	7.31807e-39	1	reactome-ddx58-ifih1-mediated-induction-of-interferon-alpha-beta
reactome-tnfr2-non-canonical-nf-kb-pathway	9.8947e-42	0.636653	1	1	1.36745e-38	1	reactome-tnfr2-non-canonical-nf-kb-pathway
reactome-fceri-mediated-nf-kb-activation	1.99345e-41	1.54197	1	0.998	2.75494e-38	1	reactome-fceri-mediated-nf-kb-activation
reactome-fc-epsilon-receptor-fceri-signaling	5.7571e-41	1.07359	1	0.998	7.95632e-38	1	reactome-fc-epsilon-receptor-fceri-signaling
reactome-met-promotes-cell-motility	1.71877e-40	1.89425	1	0.928	2.37535e-37	1	reactome-met-promotes-cell-motility
reactome-adp-signalling-through-p2y-purinoceptor-12	1.23866e-39	0.424836	0.95	0.535	1.71183e-36	1	reactome-adp-signalling-through-p2y-purinoceptor-12
reactome-response-to-metal-ions	1.72793e-39	0.832598	0.769	0.288	2.38799e-36	1	reactome-response-to-metal-ions
reactome-inflammasomes	2.26379e-39	1.34091	0.983	0.47	3.12856e-36	1	reactome-inflammasomes
reactome-cellular-responses-to-stress	3.45298e-39	0.361276	1	1	4.77201e-36	1	reactome-cellular-responses-to-stress
reactome-signaling-by-vegf	4.38622e-38	0.88475	1	1	6.06176e-35	1	reactome-signaling-by-vegf
reactome-interleukin-12-family-signaling	1.05018e-37	0.650377	1	1	1.45135e-34	1	reactome-interleukin-12-family-signaling
reactome-toll-like-receptor-9-tlr9-cascade	1.22417e-37	1.45945	1	0.982	1.6918e-34	1	reactome-toll-like-receptor-9-tlr9-cascade
reactome-downstream-signaling-events-of-b-cell-receptor-bcr	1.46877e-37	0.388651	1	1	2.02984e-34	1	reactome-downstream-signaling-events-of-b-cell-receptor-bcr
reactome-downstream-tcr-signaling	1.58131e-37	0.472165	1	1	2.18537e-34	1	reactome-downstream-tcr-signaling
reactome-collagen-formation	5.46064e-37	1.54995	0.843	0.287	7.54661e-34	1	reactome-collagen-formation
reactome-tcr-signaling	6.99227e-37	0.523119	1	1	9.66332e-34	1	reactome-tcr-signaling
reactome-hemostasis	7.79604e-37	1.59006	0.967	0.48	1.07741e-33	1	reactome-hemostasis
reactome-negative-regulators-of-ddx58-ifih1-signaling	1.82503e-36	0.959247	1	1	2.52219e-33	1	reactome-negative-regulators-of-ddx58-ifih1-signaling
reactome-class-i-mhc-mediated-antigen-processing-presentation	4.73661e-36	0.384442	1	1	6.54599e-33	1	reactome-class-i-mhc-mediated-antigen-processing-presentation
reactome-caspase-activation-via-extrinsic-apoptotic-signalling-pathway	4.99256e-36	0.4588	0.744	0.242	6.89972e-33	1	reactome-caspase-activation-via-extrinsic-apoptotic-signalling-pathway
reactome-deubiquitination	5.2351e-36	0.453915	1	1	7.2349e-33	1	reactome-deubiquitination
reactome-activation-of-nf-kappab-in-b-cells	8.34383e-36	0.376394	1	1	1.15312e-32	1	reactome-activation-of-nf-kappab-in-b-cells
reactome-antigen-processing-cross-presentation	3.53986e-35	0.507273	1	1	4.89208e-32	1	reactome-antigen-processing-cross-presentation
reactome-extra-nuclear-estrogen-signaling	3.9047e-35	1.54587	1	0.884	5.39629e-32	1	reactome-extra-nuclear-estrogen-signaling
reactome-myd88-cascade-initiated-on-plasma-membrane	4.70824e-35	1.21756	1	0.992	6.50679e-32	1	reactome-myd88-cascade-initiated-on-plasma-membrane
reactome-neutrophil-degranulation	2.33888e-34	0.673927	1	1	3.23233e-31	1	reactome-neutrophil-degranulation
reactome-regulation-of-pten-localization	2.41623e-34	1.27602	1	0.998	3.33924e-31	1	reactome-regulation-of-pten-localization
reactome-assembly-of-collagen-fibrils-and-other-multimeric-structures	2.56655e-34	1.26399	0.752	0.241	3.54698e-31	1	reactome-assembly-of-collagen-fibrils-and-other-multimeric-structures
reactome-prostacyclin-signalling-through-prostacyclin-receptor	7.32258e-34	0.271806	0.917	0.523	1.01198e-30	1	reactome-prostacyclin-signalling-through-prostacyclin-receptor
reactome-tak1-activates-nfkb-by-phosphorylation-and-activation-of-ikks-complex	1.26768e-33	1.80667	1	0.957	1.75193e-30	1	reactome-tak1-activates-nfkb-by-phosphorylation-and-activation-of-ikks-complex
reactome-sema3a-plexin-repulsion-signaling-by-inhibiting-integrin-adhesion	3.80422e-33	0.601457	0.967	0.587	5.25743e-30	1	reactome-sema3a-plexin-repulsion-signaling-by-inhibiting-integrin-adhesion
reactome-dectin-1-mediated-noncanonical-nf-kb-signaling	8.39026e-33	0.370617	1	1	1.15953e-29	1	reactome-dectin-1-mediated-noncanonical-nf-kb-signaling
reactome-programmed-cell-death	2.53993e-32	0.365544	1	1	3.51018e-29	1	reactome-programmed-cell-death
reactome-the-nlrp3-inflammasome	2.90868e-32	1.68943	1	0.665	4.01979e-29	1	reactome-the-nlrp3-inflammasome
reactome-regulation-of-insulin-secretion	3.46237e-32	0.387438	0.719	0.259	4.785e-29	1	reactome-regulation-of-insulin-secretion
reactome-josephin-domain-dubs	1.22426e-31	1.48814	1	1	1.69193e-28	1	reactome-josephin-domain-dubs
reactome-mapk-family-signaling-cascades	1.47591e-31	0.564707	1	1	2.03971e-28	1	reactome-mapk-family-signaling-cascades
reactome-signaling-by-receptor-tyrosine-kinases	1.51471e-31	0.608068	1	1	2.09332e-28	1	reactome-signaling-by-receptor-tyrosine-kinases
reactome-met-activates-ptk2-signaling	1.56962e-31	1.63573	0.983	0.627	2.16921e-28	1	reactome-met-activates-ptk2-signaling
reactome-interleukin-12-signaling	2.06715e-31	0.541519	1	1	2.8568e-28	1	reactome-interleukin-12-signaling
reactome-raf-independent-mapk1-3-activation	3.65252e-31	1.59579	0.992	0.787	5.04778e-28	1	reactome-raf-independent-mapk1-3-activation
reactome-axon-guidance	3.82221e-31	1.05192	1	0.998	5.2823e-28	1	reactome-axon-guidance
reactome-death-receptor-signalling	4.08699e-31	1.04462	1	0.995	5.64821e-28	1	reactome-death-receptor-signalling
reactome-esr-mediated-signaling	1.35707e-30	0.707775	1	1	1.87547e-27	1	reactome-esr-mediated-signaling
reactome-signaling-by-notch4	3.60434e-30	0.357283	1	1	4.9812e-27	1	reactome-signaling-by-notch4
reactome-tp53-regulates-transcription-of-death-receptors-and-ligands	4.00857e-30	1.00813	0.884	0.521	5.53985e-27	1	reactome-tp53-regulates-transcription-of-death-receptors-and-ligands
reactome-intracellular-signaling-by-second-messengers	4.95851e-30	0.425614	1	1	6.85267e-27	1	reactome-intracellular-signaling-by-second-messengers
reactome-interleukin-17-signaling	5.24528e-30	1.47062	0.992	0.965	7.24897e-27	1	reactome-interleukin-17-signaling
reactome-ecm-proteoglycans	5.86463e-30	1.34852	0.818	0.328	8.10491e-27	1	reactome-ecm-proteoglycans
reactome-ub-specific-processing-proteases	8.59483e-30	0.433196	1	1	1.18781e-26	1	reactome-ub-specific-processing-proteases
reactome-regulated-necrosis	1.72715e-29	1.55043	0.983	0.72	2.38692e-26	1	reactome-regulated-necrosis
reactome-cellular-response-to-hypoxia	2.01755e-29	0.349462	1	1	2.78826e-26	1	reactome-cellular-response-to-hypoxia
reactome-other-interleukin-signaling	2.3914e-29	0.620699	1	1	3.30491e-26	1	reactome-other-interleukin-signaling
reactome-signaling-by-notch	4.48128e-29	0.553019	1	1	6.19313e-26	1	reactome-signaling-by-notch
reactome-foxo-mediated-transcription-of-cell-cycle-genes	5.16061e-29	1.51104	1	0.791	7.13196e-26	1	reactome-foxo-mediated-transcription-of-cell-cycle-genes
reactome-senescence-associated-secretory-phenotype-sasp	7.09758e-29	1.48293	0.959	0.651	9.80886e-26	1	reactome-senescence-associated-secretory-phenotype-sasp
reactome-interleukin-15-signaling	8.56991e-29	1.21284	0.975	0.668	1.18436e-25	1	reactome-interleukin-15-signaling
reactome-collagen-biosynthesis-and-modifying-enzymes	9.34519e-29	1.50492	0.711	0.258	1.29151e-25	1	reactome-collagen-biosynthesis-and-modifying-enzymes
reactome-g-protein-beta:gamma-signalling	1.20706e-28	0.580045	0.934	0.633	1.66816e-25	1	reactome-g-protein-beta:gamma-signalling
reactome-regulation-of-actin-dynamics-for-phagocytic-cup-formation	1.73538e-28	0.299857	0.818	0.323	2.3983e-25	1	reactome-regulation-of-actin-dynamics-for-phagocytic-cup-formation
reactome-collagen-degradation	2.71887e-28	0.90384	0.595	0.169	3.75748e-25	1	reactome-collagen-degradation
reactome-rip-mediated-nfkb-activation-via-zbp1	3.66191e-28	0.679637	0.876	0.476	5.06076e-25	1	reactome-rip-mediated-nfkb-activation-via-zbp1
reactome-signal-transduction-by-l1	3.82667e-28	1.18722	1	0.997	5.28846e-25	1	reactome-signal-transduction-by-l1
reactome-interleukin-27-signaling	3.91315e-28	1.22151	0.992	0.753	5.40797e-25	1	reactome-interleukin-27-signaling
reactome-signaling-by-met	4.38765e-28	0.650177	1	1	6.06373e-25	1	reactome-signaling-by-met
reactome-activation-of-bad-and-translocation-to-mitochondria	8.76026e-28	1.33801	1	0.995	1.21067e-24	1	reactome-activation-of-bad-and-translocation-to-mitochondria
reactome-metallothioneins-bind-metals	1.30176e-27	0.732334	0.645	0.258	1.79903e-24	1	reactome-metallothioneins-bind-metals
reactome-tnfr1-induced-nfkappab-signaling-pathway	1.41448e-27	1.53301	1	0.912	1.95481e-24	1	reactome-tnfr1-induced-nfkappab-signaling-pathway
reactome-nf-kb-is-activated-and-signals-survival	2.79225e-27	1.645	1	0.947	3.85889e-24	1	reactome-nf-kb-is-activated-and-signals-survival
reactome-g-beta:gamma-signalling-through-pi3kgamma	3.58948e-27	0.255748	0.909	0.611	4.96066e-24	1	reactome-g-beta:gamma-signalling-through-pi3kgamma
reactome-interleukin-35-signalling	3.85951e-27	0.843081	0.992	0.703	5.33384e-24	1	reactome-interleukin-35-signalling
reactome-nod1-2-signaling-pathway	7.37442e-27	1.48496	1	0.931	1.01915e-23	1	reactome-nod1-2-signaling-pathway
reactome-transcriptional-regulation-by-runx2	1.68123e-26	0.442973	1	1	2.32345e-23	1	reactome-transcriptional-regulation-by-runx2
reactome-developmental-biology	3.05897e-26	0.854674	0.719	0.268	4.2275e-23	1	reactome-developmental-biology
reactome-cd209-dc-sign-signaling	4.67547e-26	1.15977	0.967	0.814	6.46151e-23	1	reactome-cd209-dc-sign-signaling
reactome-ovarian-tumor-domain-proteases	1.12159e-25	1.34684	0.992	0.985	1.55004e-22	1	reactome-ovarian-tumor-domain-proteases
reactome-response-to-elevated-platelet-cytosolic-ca2plus	1.24858e-25	0.865025	1	1	1.72554e-22	1	reactome-response-to-elevated-platelet-cytosolic-ca2plus
reactome-sting-mediated-induction-of-host-immune-responses	1.53966e-25	0.842137	0.992	0.762	2.1278e-22	1	reactome-sting-mediated-induction-of-host-immune-responses
reactome-regulation-of-ras-by-gaps	1.7448e-25	0.306247	1	1	2.41132e-22	1	reactome-regulation-of-ras-by-gaps
reactome-regulation-of-tnfr1-signaling	2.07917e-25	1.38003	0.992	0.918	2.87342e-22	1	reactome-regulation-of-tnfr1-signaling
reactome-mapk6-mapk4-signaling	2.85044e-25	0.294445	1	1	3.93931e-22	1	reactome-mapk6-mapk4-signaling
reactome-tnf-signaling	3.78152e-25	1.35268	1	0.953	5.22607e-22	1	reactome-tnf-signaling
reactome-tp53-regulates-transcription-of-cell-death-genes	4.55374e-25	1.32333	1	0.962	6.29327e-22	1	reactome-tp53-regulates-transcription-of-cell-death-genes
reactome-regulation-of-runx3-expression-and-activity	5.61015e-25	0.289545	1	1	7.75323e-22	1	reactome-regulation-of-runx3-expression-and-activity
reactome-runx1-regulates-transcription-of-genes-involved-in-differentiation-of-hscs	6.32117e-25	0.630621	1	1	8.73585e-22	1	reactome-runx1-regulates-transcription-of-genes-involved-in-differentiation-of-hscs
reactome-l1cam-interactions	6.70944e-25	1.31009	1	0.995	9.27245e-22	1	reactome-l1cam-interactions
reactome-transcriptional-regulation-by-runx3	7.28639e-25	0.369056	1	1	1.00698e-21	1	reactome-transcriptional-regulation-by-runx3
reactome-pten-regulation	1.06988e-24	0.268362	1	1	1.47858e-21	1	reactome-pten-regulation
reactome-ikba-variant-leads-to-eda-id	1.56659e-24	0.538309	0.81	0.441	2.16503e-21	1	reactome-ikba-variant-leads-to-eda-id
reactome-activation-of-the-mrna-upon-binding-of-the-cap-binding-complex-and-eifs-and-subsequent-binding-to-43s1	1.78986e-24	1.52755	1	0.994	2.47359e-21	1	reactome-activation-of-the-mrna-upon-binding-of-the-cap-binding-complex-and-eifs-and-subsequent-binding-to-43s
reactome-traf6-mediated-induction-of-tak1-complex-within-tlr4-complex	2.25154e-24	0.515148	0.909	0.576	3.11162e-21	1	reactome-traf6-mediated-induction-of-tak1-complex-within-tlr4-complex
reactome-irf3-mediated-induction-of-type-i-ifn	2.55908e-24	1.03653	0.992	0.883	3.53665e-21	1	reactome-irf3-mediated-induction-of-type-i-ifn
reactome-ticam1-rip1-mediated-ikk-complex-recruitment	2.8809e-24	1.26789	1	0.995	3.98141e-21	1	reactome-ticam1-rip1-mediated-ikk-complex-recruitment
reactome-auf1-hnrnp-d0-binds-and-destabilizes-mrna	3.26961e-24	0.271988	1	1	4.5186e-21	1	reactome-auf1-hnrnp-d0-binds-and-destabilizes-mrna
reactome-transcriptional-regulation-by-runx1	3.98785e-24	0.446906	1	1	5.51121e-21	1	reactome-transcriptional-regulation-by-runx1
reactome-interleukin-3-interleukin-5-and-gm-csf-signaling	6.08783e-24	0.712662	0.959	0.701	8.41338e-21	1	reactome-interleukin-3-interleukin-5-and-gm-csf-signaling
reactome-cell-extracellular-matrix-interactions	6.81038e-24	0.850946	1	0.992	9.41194e-21	1	reactome-cell-extracellular-matrix-interactions
reactome-g-beta:gamma-signalling-through-cdc42	7.76396e-24	0.26144	0.909	0.642	1.07298e-20	1	reactome-g-beta:gamma-signalling-through-cdc42
reactome-interleukin-6-signaling	8.15401e-24	1.24262	0.983	0.848	1.12688e-20	1	reactome-interleukin-6-signaling
reactome-eph-ephrin-signaling	1.06558e-23	0.483591	1	1	1.47263e-20	1	reactome-eph-ephrin-signaling
reactome-ikk-complex-recruitment-mediated-by-rip1	1.69169e-23	1.38747	1	0.965	2.33791e-20	1	reactome-ikk-complex-recruitment-mediated-by-rip1
reactome-map3k8-tpl2-dependent-mapk1-3-activation	1.72339e-23	1.38555	0.992	0.976	2.38172e-20	1	reactome-map3k8-tpl2-dependent-mapk1-3-activation
reactome-p75ntr-signals-via-nf-kb	1.9002e-23	1.31538	1	0.973	2.62608e-20	1	reactome-p75ntr-signals-via-nf-kb
reactome-uch-proteinases	2.75941e-23	0.288937	1	1	3.8135e-20	1	reactome-uch-proteinases
reactome-traf6-mediated-nf-kb-activation	3.04519e-23	0.930547	0.926	0.683	4.20845e-20	1	reactome-traf6-mediated-nf-kb-activation
reactome-dcc-mediated-attractive-signaling	5.26565e-23	1.51553	1	0.957	7.27713e-20	1	reactome-dcc-mediated-attractive-signaling
reactome-syndecan-interactions	8.45291e-23	1.36601	0.992	0.939	1.16819e-19	1	reactome-syndecan-interactions
reactome-hedgehog-ligand-biogenesis	8.7785e-23	0.316257	1	1	1.21319e-19	1	reactome-hedgehog-ligand-biogenesis
reactome-pre-notch-processing-in-golgi	1.24867e-22	0.802617	0.992	0.765	1.72566e-19	1	reactome-pre-notch-processing-in-golgi
reactome-opioid-signalling	1.34032e-22	0.501566	0.868	0.616	1.85233e-19	1	reactome-opioid-signalling
reactome-pre-notch-expression-and-processing	1.40775e-22	0.453499	0.719	0.351	1.94551e-19	1	reactome-pre-notch-expression-and-processing
reactome-bmal1:clock-npas2-activates-circadian-gene-expression	1.62745e-22	1.02216	0.967	0.758	2.24914e-19	1	reactome-bmal1:clock-npas2-activates-circadian-gene-expression
reactome-egfr-downregulation	1.77757e-22	1.34335	1	0.971	2.45661e-19	1	reactome-egfr-downregulation
reactome-signaling-by-notch1-in-cancer	2.01746e-22	0.829803	1	1	2.78814e-19	1	reactome-signaling-by-notch1-in-cancer
reactome-fcgamma-receptor-fcgr-dependent-phagocytosis	2.96789e-22	0.506987	0.86	0.416	4.10163e-19	1	reactome-fcgamma-receptor-fcgr-dependent-phagocytosis
reactome-cooperation-of-pdcl-phlp1-and-tric-cct-in-g-protein-beta-folding	3.01762e-22	1.25654	1	0.998	4.17036e-19	1	reactome-cooperation-of-pdcl-phlp1-and-tric-cct-in-g-protein-beta-folding
reactome-sumoylation-of-immune-response-proteins	3.78113e-22	1.04946	1	0.936	5.22552e-19	1	reactome-sumoylation-of-immune-response-proteins
reactome-beta-catenin-independent-wnt-signaling	5.03914e-22	0.349628	1	1	6.96409e-19	1	reactome-beta-catenin-independent-wnt-signaling
reactome-signaling-by-wnt	9.66231e-22	0.434138	1	1	1.33533e-18	1	reactome-signaling-by-wnt
reactome-regulation-of-ifng-signaling	1.09777e-21	1.1077	1	0.977	1.51711e-18	1	reactome-regulation-of-ifng-signaling
reactome-activation-of-irf3-irf7-mediated-by-tbk1-ikk-epsilon	1.17744e-21	0.79974	0.975	0.835	1.62722e-18	1	reactome-activation-of-irf3-irf7-mediated-by-tbk1-ikk-epsilon
reactome-zbp1-dai-mediated-induction-of-type-i-ifns	1.23198e-21	0.645984	0.868	0.564	1.7026e-18	1	reactome-zbp1-dai-mediated-induction-of-type-i-ifns
reactome-regulation-of-localization-of-foxo-transcription-factors	1.60922e-21	1.22181	1	0.944	2.22394e-18	1	reactome-regulation-of-localization-of-foxo-transcription-factors
reactome-transcriptional-regulation-of-granulopoiesis	1.63526e-21	0.709249	0.579	0.218	2.25993e-18	1	reactome-transcriptional-regulation-of-granulopoiesis
reactome-integration-of-energy-metabolism	5.69657e-21	0.894566	0.884	0.678	7.87265e-18	1	reactome-integration-of-energy-metabolism
reactome-platelet-aggregation-plug-formation	7.48735e-21	0.627846	0.959	0.616	1.03475e-17	1	reactome-platelet-aggregation-plug-formation
reactome-glucagon-like-peptide-1-glp1-regulates-insulin-secretion	7.59823e-21	0.357307	0.702	0.38	1.05007e-17	1	reactome-glucagon-like-peptide-1-glp1-regulates-insulin-secretion
reactome-activation-of-bh3-only-proteins	7.67652e-21	1.20147	1	0.991	1.06089e-17	1	reactome-activation-of-bh3-only-proteins
reactome-trail-signaling	8.36725e-21	0.8012	0.711	0.348	1.15635e-17	1	reactome-trail-signaling
reactome-regulation-of-gene-expression-by-hypoxia-inducible-factor	1.06491e-20	1.30335	0.983	0.942	1.47171e-17	1	reactome-regulation-of-gene-expression-by-hypoxia-inducible-factor
reactome-bh3-only-proteins-associate-with-and-inactivate-anti-apoptotic-bcl-2-members	1.68189e-20	0.334668	0.917	0.715	2.32437e-17	1	reactome-bh3-only-proteins-associate-with-and-inactivate-anti-apoptotic-bcl-2-members
reactome-mapk1-erk2-activation	2.4353e-20	1.05608	0.967	0.819	3.36558e-17	1	reactome-mapk1-erk2-activation
reactome-ire1alpha-activates-chaperones	3.29659e-20	0.461392	1	1	4.55589e-17	1	reactome-ire1alpha-activates-chaperones
reactome-estrogen-dependent-nuclear-events-downstream-of-esr-membrane-signaling	5.21944e-20	0.417924	0.893	0.634	7.21327e-17	1	reactome-estrogen-dependent-nuclear-events-downstream-of-esr-membrane-signaling
reactome-unfolded-protein-response-upr	6.55362e-20	0.379421	1	1	9.0571e-17	1	reactome-unfolded-protein-response-upr
reactome-cellular-senescence	1.40413e-19	0.943356	1	0.973	1.94051e-16	1	reactome-cellular-senescence
reactome-rho-gtpases-activate-wasps-and-waves	1.4335e-19	0.393468	1	1	1.9811e-16	1	reactome-rho-gtpases-activate-wasps-and-waves
reactome-notch4-intracellular-domain-regulates-transcription	1.48456e-19	0.605118	0.802	0.54	2.05167e-16	1	reactome-notch4-intracellular-domain-regulates-transcription
reactome-mapk3-erk1-activation	1.48808e-19	0.929881	0.967	0.817	2.05653e-16	1	reactome-mapk3-erk1-activation
reactome-regulation-of-innate-immune-responses-to-cytosolic-dna	1.9379e-19	0.31518	0.983	0.828	2.67818e-16	1	reactome-regulation-of-innate-immune-responses-to-cytosolic-dna
reactome-signaling-by-nuclear-receptors	2.50774e-19	0.57889	1	1	3.4657e-16	1	reactome-signaling-by-nuclear-receptors
reactome-regulated-proteolysis-of-p75ntr	2.51127e-19	0.604865	0.959	0.79	3.47058e-16	1	reactome-regulated-proteolysis-of-p75ntr
reactome-hsf1-activation1	2.56881e-19	0.900817	1	1	3.55009e-16	1	reactome-hsf1-activation
reactome-tp53-regulates-transcription-of-genes-involved-in-cytochrome-c-release	2.75135e-19	0.773909	0.967	0.878	3.80236e-16	1	reactome-tp53-regulates-transcription-of-genes-involved-in-cytochrome-c-release
reactome-ephb-mediated-forward-signaling	4.06821e-19	0.418906	1	1	5.62227e-16	1	reactome-ephb-mediated-forward-signaling
reactome-runx3-regulates-p14-arf	5.75861e-19	0.77359	0.835	0.631	7.9584e-16	1	reactome-runx3-regulates-p14-arf
reactome-gene-and-protein-expression-by-jak-stat-signaling-after-interleukin-12-stimulation	6.79315e-19	0.369669	1	1	9.38814e-16	1	reactome-gene-and-protein-expression-by-jak-stat-signaling-after-interleukin-12-stimulation
reactome-integrin-signaling	7.0627e-19	0.80547	1	0.942	9.76066e-16	1	reactome-integrin-signaling
reactome-constitutive-signaling-by-akt1-e17k-in-cancer	7.83908e-19	0.969974	0.983	0.936	1.08336e-15	1	reactome-constitutive-signaling-by-akt1-e17k-in-cancer
reactome-uptake-and-actions-of-bacterial-toxins	8.48718e-19	1.0692	0.983	0.899	1.17293e-15	1	reactome-uptake-and-actions-of-bacterial-toxins
reactome-regulation-of-cytoskeletal-remodeling-and-cell-spreading-by-ipp-complex-components	9.19694e-19	0.724963	0.967	0.854	1.27102e-15	1	reactome-regulation-of-cytoskeletal-remodeling-and-cell-spreading-by-ipp-complex-components
reactome-regulation-of-expression-of-slits-and-robos1	1.25704e-18	0.948652	0.992	0.904	1.73722e-15	1	reactome-regulation-of-expression-of-slits-and-robos
reactome-n-glycan-trimming-in-the-er-and-calnexin-calreticulin-cycle	1.43716e-18	0.397782	1	1	1.98615e-15	1	reactome-n-glycan-trimming-in-the-er-and-calnexin-calreticulin-cycle
reactome-laminin-interactions	1.44625e-18	1.27653	0.942	0.84	1.99872e-15	1	reactome-laminin-interactions
reactome-ticam1-dependent-activation-of-irf3-irf7	1.99959e-18	0.779475	1	0.951	2.76344e-15	1	reactome-ticam1-dependent-activation-of-irf3-irf7
reactome-regulation-of-runx2-expression-and-activity	2.04459e-18	0.283202	1	1	2.82562e-15	1	reactome-regulation-of-runx2-expression-and-activity
reactome-cd28-co-stimulation	2.15063e-18	0.953695	0.983	0.933	2.97218e-15	1	reactome-cd28-co-stimulation
reactome-transcriptional-regulation-of-white-adipocyte-differentiation	2.44679e-18	0.754423	1	0.997	3.38147e-15	1	reactome-transcriptional-regulation-of-white-adipocyte-differentiation
reactome-regulation-of-insulin-like-growth-factor-igf-transport-and-uptake-by-insulin-like-growth-factor-binding-proteins-igfbps	2.80797e-18	0.768621	0.967	0.645	3.88061e-15	1	reactome-regulation-of-insulin-like-growth-factor-igf-transport-and-uptake-by-insulin-like-growth-factor-binding-proteins-igfbps
reactome-retrograde-neurotrophin-signalling	4.86394e-18	0.894102	1	0.93	6.72197e-15	1	reactome-retrograde-neurotrophin-signalling
reactome-dex-h-box-helicases-activate-type-i-ifn-and-inflammatory-cytokines-production	6.8003e-18	1.00204	0.901	0.773	9.39801e-15	1	reactome-dex-h-box-helicases-activate-type-i-ifn-and-inflammatory-cytokines-production
reactome-hsp90-chaperone-cycle-for-steroid-hormone-receptors-shr	6.93658e-18	0.358152	1	1	9.58636e-15	1	reactome-hsp90-chaperone-cycle-for-steroid-hormone-receptors-shr
reactome-uptake-and-function-of-diphtheria-toxin	7.29228e-18	0.988001	1	1	1.00779e-14	1	reactome-uptake-and-function-of-diphtheria-toxin
reactome-semaphorin-interactions	1.12043e-17	0.835195	1	1	1.54844e-14	1	reactome-semaphorin-interactions
reactome-regulation-of-foxo-transcriptional-activity-by-acetylation	1.18817e-17	0.824909	0.983	0.861	1.64206e-14	1	reactome-regulation-of-foxo-transcriptional-activity-by-acetylation
reactome-eph-ephrin-mediated-repulsion-of-cells	1.39578e-17	1.10282	0.983	0.96	1.92897e-14	1	reactome-eph-ephrin-mediated-repulsion-of-cells
reactome-attenuation-phase	1.43054e-17	0.779148	1	1	1.97701e-14	1	reactome-attenuation-phase
reactome-metabolism-of-nitric-oxide:-enos-activation-and-regulation	1.53188e-17	1.00214	1	0.982	2.11706e-14	1	reactome-metabolism-of-nitric-oxide:-enos-activation-and-regulation
reactome-foxo-mediated-transcription-of-cell-death-genes	2.10458e-17	0.556319	0.901	0.709	2.90852e-14	1	reactome-foxo-mediated-transcription-of-cell-death-genes
reactome-regulation-of-signaling-by-cbl	3.26578e-17	0.769434	0.992	0.966	4.5133e-14	1	reactome-regulation-of-signaling-by-cbl
reactome-ephrin-signaling	4.88032e-17	0.458621	0.975	0.86	6.74461e-14	1	reactome-ephrin-signaling
reactome-signaling-by-notch2	1.1591e-16	0.79559	0.992	0.963	1.60187e-13	1	reactome-signaling-by-notch2
reactome-mapk-targets-nuclear-events-mediated-by-map-kinases	1.3869e-16	0.714595	0.992	0.933	1.9167e-13	1	reactome-mapk-targets-nuclear-events-mediated-by-map-kinases
reactome-pecam1-interactions	1.50323e-16	0.814484	0.793	0.575	2.07747e-13	1	reactome-pecam1-interactions
reactome-deadenylation-of-mrna	1.60654e-16	0.447845	1	1	2.22023e-13	1	reactome-deadenylation-of-mrna
reactome-sema4d-mediated-inhibition-of-cell-attachment-and-migration	1.64794e-16	0.580801	0.95	0.864	2.27745e-13	1	reactome-sema4d-mediated-inhibition-of-cell-attachment-and-migration
reactome-enos-activation	1.74861e-16	0.912417	0.983	0.947	2.41658e-13	1	reactome-enos-activation
reactome-traf6-mediated-irf7-activation-in-tlr7-8-or-9-signaling	2.08519e-16	0.597558	1	0.97	2.88173e-13	1	reactome-traf6-mediated-irf7-activation-in-tlr7-8-or-9-signaling
reactome-inlb-mediated-entry-of-listeria-monocytogenes-into-host-cell	2.16447e-16	0.895581	1	1	2.9913e-13	1	reactome-inlb-mediated-entry-of-listeria-monocytogenes-into-host-cell
reactome-notch-hlh-transcription-pathway	2.24101e-16	1.1405	0.967	0.96	3.09707e-13	1	reactome-notch-hlh-transcription-pathway
reactome-advanced-glycosylation-endproduct-receptor-signaling	2.96081e-16	0.785626	0.992	0.995	4.09184e-13	1	reactome-advanced-glycosylation-endproduct-receptor-signaling
reactome-notch1-intracellular-domain-regulates-transcription	3.28573e-16	0.582952	1	1	4.54087e-13	1	reactome-notch1-intracellular-domain-regulates-transcription
reactome-calcineurin-activates-nfat	3.37073e-16	1.05116	1	0.992	4.65834e-13	1	reactome-calcineurin-activates-nfat
reactome-non-integrin-membrane-ecm-interactions	4.1298e-16	0.891443	0.992	0.922	5.70739e-13	1	reactome-non-integrin-membrane-ecm-interactions
reactome-clec7a-dectin-1-induces-nfat-activation	4.66742e-16	1.12967	0.917	0.845	6.45037e-13	1	reactome-clec7a-dectin-1-induces-nfat-activation
reactome-uptake-and-function-of-anthrax-toxins	4.8052e-16	0.597851	0.95	0.838	6.64079e-13	1	reactome-uptake-and-function-of-anthrax-toxins
reactome-oxidative-stress-induced-senescence	5.3458e-16	0.82662	0.967	0.802	7.38789e-13	1	reactome-oxidative-stress-induced-senescence
reactome-vitamin-c-ascorbate-metabolism	6.55872e-16	0.769153	0.992	0.968	9.06415e-13	1	reactome-vitamin-c-ascorbate-metabolism
reactome-smooth-muscle-contraction	6.59932e-16	0.734691	1	1	9.12026e-13	1	reactome-smooth-muscle-contraction
reactome-er-quality-control-compartment-erqc	6.8421e-16	0.504913	1	1	9.45579e-13	1	reactome-er-quality-control-compartment-erqc
reactome-calnexin-calreticulin-cycle	8.40361e-16	0.398333	1	1	1.16138e-12	1	reactome-calnexin-calreticulin-cycle
reactome-intrinsic-pathway-for-apoptosis	8.77458e-16	0.586336	1	1	1.21265e-12	1	reactome-intrinsic-pathway-for-apoptosis
reactome-notch2-activation-and-transmission-of-signal-to-the-nucleus	8.8366e-16	0.780372	0.983	0.983	1.22122e-12	1	reactome-notch2-activation-and-transmission-of-signal-to-the-nucleus
reactome-amyloid-fiber-formation	9.6633e-16	0.652676	0.702	0.367	1.33547e-12	1	reactome-amyloid-fiber-formation
reactome-signaling-by-robo-receptors1	1.63064e-15	0.824693	1	0.994	2.25354e-12	1	reactome-signaling-by-robo-receptors
reactome-akt-phosphorylates-targets-in-the-cytosol	1.63305e-15	0.584155	0.959	0.86	2.25687e-12	1	reactome-akt-phosphorylates-targets-in-the-cytosol
reactome-cytosolic-sensors-of-pathogen-associated-dna	1.76362e-15	0.480826	1	0.998	2.43733e-12	1	reactome-cytosolic-sensors-of-pathogen-associated-dna
reactome-signaling-by-ras-mutants	2.21422e-15	0.64902	1	0.998	3.06005e-12	1	reactome-signaling-by-ras-mutants
reactome-transcriptional-activity-of-smad2-smad3:smad4-heterotrimer	3.76258e-15	0.356832	1	1	5.19988e-12	1	reactome-transcriptional-activity-of-smad2-smad3:smad4-heterotrimer
reactome-glycogen-synthesis	5.06173e-15	0.827343	0.992	0.98	6.99531e-12	1	reactome-glycogen-synthesis
reactome-clathrin-mediated-endocytosis	5.75266e-15	0.361507	1	1	7.95018e-12	1	reactome-clathrin-mediated-endocytosis
reactome-vegfr2-mediated-vascular-permeability	6.70835e-15	0.657462	1	1	9.27094e-12	1	reactome-vegfr2-mediated-vascular-permeability
reactome-activated-notch1-transmits-signal-to-the-nucleus	9.26543e-15	0.496948	0.967	0.945	1.28048e-11	1	reactome-activated-notch1-transmits-signal-to-the-nucleus
reactome-signaling-by-pdgf	9.45154e-15	1.04659	0.959	0.921	1.3062e-11	1	reactome-signaling-by-pdgf
reactome-transcriptional-regulation-by-mecp2	9.54081e-15	1.02648	0.959	0.971	1.31854e-11	1	reactome-transcriptional-regulation-by-mecp2
reactome-fbxw7-mutants-and-notch1-in-cancer	1.0039e-14	1.25793	0.909	0.904	1.38738e-11	1	reactome-fbxw7-mutants-and-notch1-in-cancer
reactome-ros-and-rns-production-in-phagocytes	1.03561e-14	0.753526	0.975	0.945	1.43121e-11	1	reactome-ros-and-rns-production-in-phagocytes
reactome-nephrin-family-interactions	1.14563e-14	0.474554	0.975	0.948	1.58326e-11	1	reactome-nephrin-family-interactions
reactome-negative-regulation-of-met-activity	1.19808e-14	0.776595	0.992	1	1.65575e-11	1	reactome-negative-regulation-of-met-activity
reactome-hsf1-dependent-transactivation	1.20223e-14	0.76362	1	1	1.66148e-11	1	reactome-hsf1-dependent-transactivation
reactome-signaling-by-egfr	1.22742e-14	0.74037	1	0.995	1.69629e-11	1	reactome-signaling-by-egfr
reactome-diseases-of-signal-transduction	1.28823e-14	0.258004	1	1	1.78034e-11	1	reactome-diseases-of-signal-transduction
reactome-rho-gtpases-activate-pkns	1.45675e-14	1.06305	0.942	0.82	2.01324e-11	1	reactome-rho-gtpases-activate-pkns
reactome-assembly-of-the-hiv-virion	1.45855e-14	0.834794	1	0.994	2.01572e-11	1	reactome-assembly-of-the-hiv-virion
reactome-negative-regulation-of-fgfr1-signaling	1.7952e-14	0.447885	0.959	0.912	2.48096e-11	1	reactome-negative-regulation-of-fgfr1-signaling
reactome-synthesis-of-udp-n-acetyl-glucosamine	1.85668e-14	0.83751	0.942	0.91	2.56594e-11	1	reactome-synthesis-of-udp-n-acetyl-glucosamine
reactome-hyaluronan-uptake-and-degradation	1.90964e-14	0.641577	0.884	0.814	2.63912e-11	1	reactome-hyaluronan-uptake-and-degradation
reactome-signaling-by-tgf-beta-receptor-complex-in-cancer	1.92813e-14	1.06993	0.934	0.909	2.66468e-11	1	reactome-signaling-by-tgf-beta-receptor-complex-in-cancer
reactome-signal-attenuation	2.18393e-14	0.429959	0.992	0.936	3.01819e-11	1	reactome-signal-attenuation
reactome-negative-regulation-of-fgfr4-signaling	2.28412e-14	0.250993	0.975	0.95	3.15666e-11	1	reactome-negative-regulation-of-fgfr4-signaling
reactome-irak2-mediated-activation-of-tak1-complex	2.3757e-14	0.74412	0.975	0.941	3.28321e-11	1	reactome-irak2-mediated-activation-of-tak1-complex
reactome-crosslinking-of-collagen-fibrils	2.63451e-14	0.580019	0.752	0.457	3.64089e-11	1	reactome-crosslinking-of-collagen-fibrils
reactome-signaling-by-notch3	3.34571e-14	0.536136	0.959	0.93	4.62377e-11	1	reactome-signaling-by-notch3
reactome-signaling-by-scf-kit	3.84976e-14	0.45816	0.893	0.811	5.32037e-11	1	reactome-signaling-by-scf-kit
reactome-signaling-by-notch1	4.17746e-14	0.600513	1	1	5.77326e-11	1	reactome-signaling-by-notch1
reactome-notch4-activation-and-transmission-of-signal-to-the-nucleus	5.25712e-14	0.71846	0.967	0.948	7.26534e-11	1	reactome-notch4-activation-and-transmission-of-signal-to-the-nucleus
reactome-negative-regulation-of-fgfr3-signaling	7.2095e-14	0.372652	1	0.97	9.96353e-11	1	reactome-negative-regulation-of-fgfr3-signaling
reactome-sumoylation-of-intracellular-receptors	7.55226e-14	0.407913	0.876	0.686	1.04372e-10	1	reactome-sumoylation-of-intracellular-receptors
reactome-smad2-smad3:smad4-heterotrimer-regulates-transcription	7.84381e-14	0.491518	1	1	1.08401e-10	1	reactome-smad2-smad3:smad4-heterotrimer-regulates-transcription
reactome-rho-gtpase-cycle	8.56527e-14	0.333318	0.926	0.857	1.18372e-10	1	reactome-rho-gtpase-cycle
reactome-meiotic-synapsis	8.85207e-14	0.265782	0.628	0.37	1.22336e-10	1	reactome-meiotic-synapsis
reactome-tbc-rabgaps	9.57143e-14	0.518349	0.992	0.998	1.32277e-10	1	reactome-tbc-rabgaps
reactome-vegfr2-mediated-cell-proliferation	9.60306e-14	1.00205	0.934	0.924	1.32714e-10	1	reactome-vegfr2-mediated-cell-proliferation
reactome-ctla4-inhibitory-signaling	1.01987e-13	0.822076	0.967	0.96	1.40945e-10	1	reactome-ctla4-inhibitory-signaling
reactome-ca2plus-pathway	1.11946e-13	0.339471	0.934	0.873	1.54709e-10	1	reactome-ca2plus-pathway
reactome-loss-of-function-of-tgfbr1-in-cancer	1.26969e-13	0.829487	0.909	0.846	1.75471e-10	1	reactome-loss-of-function-of-tgfbr1-in-cancer
reactome-jnk-c-jun-kinases-phosphorylation-and-activation-mediated-by-activated-human-tak1	1.65322e-13	0.734928	0.967	0.98	2.28476e-10	1	reactome-jnk-c-jun-kinases-phosphorylation-and-activation-mediated-by-activated-human-tak1
reactome-epha-mediated-growth-cone-collapse	1.92412e-13	0.586137	0.942	0.913	2.65914e-10	1	reactome-epha-mediated-growth-cone-collapse
reactome-gap-junction-degradation	1.95072e-13	0.539061	1	1	2.69589e-10	1	reactome-gap-junction-degradation
reactome-rab-regulation-of-trafficking	2.3847e-13	0.377297	1	1	3.29565e-10	1	reactome-rab-regulation-of-trafficking
reactome-signaling-by-egfr-in-cancer	2.65322e-13	0.421081	0.992	0.989	3.66676e-10	1	reactome-signaling-by-egfr-in-cancer
reactome-sumoylation-of-transcription-cofactors	3.27734e-13	0.36436	1	1	4.52928e-10	1	reactome-sumoylation-of-transcription-cofactors
reactome-activation-of-rac1-downstream-of-nmdars	3.46104e-13	0.579869	0.884	0.814	4.78316e-10	1	reactome-activation-of-rac1-downstream-of-nmdars
reactome-met-activates-rap1-and-rac1	4.83577e-13	0.700477	0.992	0.977	6.68304e-10	1	reactome-met-activates-rap1-and-rac1
reactome-aryl-hydrocarbon-receptor-signalling	7.00419e-13	0.374967	0.975	0.907	9.67979e-10	1	reactome-aryl-hydrocarbon-receptor-signalling
reactome-runx3-regulates-notch-signaling	8.39429e-13	0.401833	0.851	0.727	1.16009e-09	1	reactome-runx3-regulates-notch-signaling
reactome-negative-feedback-regulation-of-mapk-pathway	1.05758e-12	0.8173	0.901	0.864	1.46157e-09	1	reactome-negative-feedback-regulation-of-mapk-pathway
reactome-cd28-dependent-pi3k-akt-signaling	1.12579e-12	0.264601	0.818	0.701	1.55584e-09	1	reactome-cd28-dependent-pi3k-akt-signaling
reactome-sema3a-pak-dependent-axon-repulsion	1.30992e-12	0.725743	0.992	0.965	1.81032e-09	1	reactome-sema3a-pak-dependent-axon-repulsion
reactome-cargo-concentration-in-the-er	1.56904e-12	0.647867	1	0.997	2.16842e-09	1	reactome-cargo-concentration-in-the-er
reactome-runx1-regulates-genes-involved-in-megakaryocyte-differentiation-and-platelet-function	1.89067e-12	0.387197	0.653	0.401	2.6129e-09	1	reactome-runx1-regulates-genes-involved-in-megakaryocyte-differentiation-and-platelet-function
reactome-p75-ntr-receptor-mediated-signalling	2.32286e-12	0.617318	1	0.992	3.2102e-09	1	reactome-p75-ntr-receptor-mediated-signalling
reactome-neurodegenerative-diseases	3.24096e-12	0.656747	1	0.998	4.47901e-09	1	reactome-neurodegenerative-diseases
reactome-activated-tak1-mediates-p38-mapk-activation	3.91413e-12	0.357344	0.967	0.936	5.40932e-09	1	reactome-activated-tak1-mediates-p38-mapk-activation
reactome-ticam1-traf6-dependent-induction-of-tak1-complex	6.22107e-12	0.466184	0.942	0.899	8.59752e-09	1	reactome-ticam1-traf6-dependent-induction-of-tak1-complex
reactome-the-role-of-nef-in-hiv-1-replication-and-disease-pathogenesis	7.46277e-12	0.674544	0.992	0.992	1.03135e-08	1	reactome-the-role-of-nef-in-hiv-1-replication-and-disease-pathogenesis
reactome-nuclear-events-kinase-and-transcription-factor-activation	1.40812e-11	0.451207	0.942	0.915	1.94602e-08	1	reactome-nuclear-events-kinase-and-transcription-factor-activation
reactome-irak1-recruits-ikk-complex	1.43871e-11	0.522201	1	0.985	1.9883e-08	1	reactome-irak1-recruits-ikk-complex
reactome-met-activates-ras-signaling	1.73702e-11	0.801262	0.917	0.941	2.40056e-08	1	reactome-met-activates-ras-signaling
reactome-recycling-pathway-of-l1	1.95396e-11	0.746826	1	0.995	2.70037e-08	1	reactome-recycling-pathway-of-l1
reactome-tgf-beta-receptor-signaling-activates-smads	2.06931e-11	0.325105	1	1	2.85979e-08	1	reactome-tgf-beta-receptor-signaling-activates-smads
reactome-rho-gtpases-activate-ktn11	2.95029e-11	0.647265	1	0.998	4.0773e-08	1	reactome-rho-gtpases-activate-ktn1
reactome-runx2-regulates-osteoblast-differentiation	4.05777e-11	0.46371	0.851	0.713	5.60784e-08	1	reactome-runx2-regulates-osteoblast-differentiation
reactome-oncogenic-mapk-signaling	4.4256e-11	0.338595	1	1	6.11617e-08	1	reactome-oncogenic-mapk-signaling
reactome-tp53-regulates-transcription-of-several-additional-cell-death-genes-whose-specific-roles-in-p53-dependent-apoptosis-remain-uncertain	4.74353e-11	0.340665	0.868	0.8	6.55555e-08	1	reactome-tp53-regulates-transcription-of-several-additional-cell-death-genes-whose-specific-roles-in-p53-dependent-apoptosis-remain-uncertain
reactome-rab-gefs-exchange-gtp-for-gdp-on-rabs	5.93206e-11	0.372907	1	0.998	8.19811e-08	1	reactome-rab-gefs-exchange-gtp-for-gdp-on-rabs
reactome-wnt5a-dependent-internalization-of-fzd4	1.07354e-10	0.332034	0.992	0.974	1.48364e-07	1	reactome-wnt5a-dependent-internalization-of-fzd4
reactome-caspase-mediated-cleavage-of-cytoskeletal-proteins	1.44867e-10	0.563542	0.942	0.93	2.00206e-07	1	reactome-caspase-mediated-cleavage-of-cytoskeletal-proteins
reactome-downregulation-of-tgf-beta-receptor-signaling	1.6751e-10	0.346627	1	1	2.31499e-07	1	reactome-downregulation-of-tgf-beta-receptor-signaling
reactome-oncogene-induced-senescence	2.11426e-10	0.636957	1	1	2.9219e-07	1	reactome-oncogene-induced-senescence
reactome-rho-gtpases-activate-rocks	2.33713e-10	0.299561	1	1	3.22991e-07	1	reactome-rho-gtpases-activate-rocks
reactome-sumoylation-of-transcription-factors	2.67226e-10	0.281864	0.983	0.977	3.69306e-07	1	reactome-sumoylation-of-transcription-factors
reactome-pink-parkin-mediated-mitophagy	4.25531e-10	0.268355	1	1	5.88083e-07	1	reactome-pink-parkin-mediated-mitophagy
reactome-tcf-dependent-signaling-in-response-to-wnt	5.0807e-10	0.276653	1	1	7.02152e-07	1	reactome-tcf-dependent-signaling-in-response-to-wnt
reactome-nef-mediated-cd4-down-regulation	5.99416e-10	0.340557	0.992	0.994	8.28392e-07	1	reactome-nef-mediated-cd4-down-regulation
[truncated: 1,195 more rows]

## Sheet: table s3-4 GO-based_GC-DEF
	p_val	avg_log2FC	pct.1	pct.2	p_val_adj	cluster	gene
go-tube-formation	6.68595e-29	1.42048	1	0.973	6.68328e-25	0	go-tube-formation
[truncated: 10,127 more rows]

## Sheet: table s3-5 pathway-based_GC-DEF
	p_val	avg_log2FC	pct.1	pct.2	p_val_adj	cluster	gene
[truncated: 2,472 more rows]
