# Supplementary material for: FEM: mining biological meaning from cell level in single-cell RNA sequencing data
Source: PeerJ. 2021 Nov 30;9:e12570. doi: 10.7717/peerj.12570 (PMC8641482; doi:10.7717/peerj.12570)
Supplement: Supplemental Information 5 — Table S4-1 Differential expression of all genes between gene-based clusters. Table S4-2 Differential expression of all GO between GO-based clusters. Table S4-3 Differential expression of all GO between gene-based clusters. Table S4-4 Differential expression of all pathways between pathway-based clusters. Table S4-5 Differential expression of all pathways between gene-based clusters. [file peerj-09-12570-s005.xlsx]

## Sheet: table s3-1 GC-DEG
	p_val	avg_log2FC	pct.1	pct.2	p_val_adj	cluster	gene
TMEM236	2.1985e-108	0.954475	0.817	0.197	3.8643e-104	0	TMEM236
PTPRT	7.42513e-103	0.899995	0.854	0.219	1.30512e-98	0	PTPRT
IRX2	1.16075e-101	1.06352	1	0.344	2.04026e-97	0	IRX2
FSTL5	4.10368e-99	0.875481	0.864	0.244	7.21303e-95	0	FSTL5
PYROXD2	3.54792e-94	0.901411	0.734	0.186	6.23617e-90	0	PYROXD2
SLC38A4	3.65955e-93	0.929587	0.985	0.433	6.43239e-89	0	SLC38A4
F10	3.7248e-90	0.735173	0.808	0.213	6.54709e-86	0	F10
PPP2R2B	6.4695e-90	0.840319	0.861	0.273	1.13714e-85	0	PPP2R2B
PTGER3	7.29858e-88	0.757896	0.74	0.196	1.28287e-83	0	PTGER3
POPDC3	2.51531e-85	0.748647	0.759	0.202	4.42116e-81	0	POPDC3
FXYD3	5.70935e-85	0.831984	0.858	0.313	1.00353e-80	0	FXYD3
CFC1	1.2652e-84	0.872418	0.935	0.469	2.22384e-80	0	CFC1
KLHL41	5.14147e-84	1.08321	0.817	0.288	9.03717e-80	0	KLHL41
GPR64	3.21521e-83	0.797313	0.78	0.224	5.65137e-79	0	GPR64
FAP	7.86253e-82	0.983433	0.978	0.398	1.382e-77	0	FAP
FAM84A	1.27566e-80	0.894315	0.777	0.26	2.24224e-76	0	FAM84A
ABCG2	5.4417e-79	0.555047	0.458	0.07	9.56488e-75	0	ABCG2
ARX	6.9381e-79	0.907983	0.975	0.364	1.21951e-74	0	ARX
MLIP	5.23538e-78	0.606534	0.508	0.09	9.20223e-74	0	MLIP
LOXL4	1.21604e-77	0.981571	0.913	0.356	2.13743e-73	0	LOXL4
CRTAC1	5.18919e-77	0.759366	0.563	0.121	9.12104e-73	0	CRTAC1
PLCE1	8.22701e-77	0.995248	0.858	0.346	1.44606e-72	0	PLCE1
CRYBA2	8.25531e-77	0.902692	0.947	0.393	1.45104e-72	0	CRYBA2
CRYM	1.13579e-75	0.437654	0.31	0.026	1.99637e-71	0	CRYM
RGS4	6.60978e-75	0.854859	1	0.606	1.1618e-70	0	RGS4
FEV	7.14238e-75	0.838468	0.932	0.356	1.25542e-70	0	FEV
GLT1D1	4.64212e-72	0.580559	0.625	0.146	8.15946e-68	0	GLT1D1
LOC100216479	4.81548e-70	0.706045	0.963	0.515	8.46417e-66	0	LOC100216479
PDE3B	1.38738e-69	0.728824	0.966	0.557	2.4386e-65	0	PDE3B
GCNT1	5.17813e-68	0.723161	0.941	0.49	9.1016e-64	0	GCNT1
VSTM2L	1.53626e-67	0.581161	0.613	0.156	2.70029e-63	0	VSTM2L
ELL2	4.15467e-65	0.492342	1	0.886	7.30267e-61	0	ELL2
KCNA5	5.73189e-65	0.687248	0.836	0.332	1.00749e-60	0	KCNA5
CYP4F24P	6.17146e-65	0.565143	0.502	0.109	1.08476e-60	0	CYP4F24P
ADORA2A	1.14756e-64	0.484764	0.461	0.087	2.01706e-60	0	ADORA2A
PRKAG2-AS1	1.44068e-64	0.66628	0.678	0.22	2.53229e-60	0	PRKAG2-AS1
SSX2IP	1.66843e-62	0.631372	0.969	0.597	2.9326e-58	0	SSX2IP
ARRDC4	1.69511e-62	0.85275	0.882	0.496	2.9795e-58	0	ARRDC4
KCNJ3	3.09852e-62	0.667414	0.907	0.369	5.44627e-58	0	KCNJ3
GLS	5.52466e-62	0.54832	1	0.862	9.7107e-58	0	GLS
SPC25	8.17579e-62	0.759737	0.697	0.251	1.43706e-57	0	SPC25
CNIH3	1.42925e-61	0.582416	0.635	0.18	2.51219e-57	0	CNIH3
STAT4	1.48631e-61	0.5428	0.619	0.166	2.61248e-57	0	STAT4
KCNJ6	3.15691e-61	0.637728	0.901	0.384	5.5489e-57	0	KCNJ6
DPP4	7.75851e-61	0.615462	0.697	0.21	1.36371e-56	0	DPP4
GC	1.35698e-60	0.842936	0.994	0.653	2.38516e-56	0	GC
SMOC1	2.0962e-60	0.728181	0.83	0.341	3.68449e-56	0	SMOC1
CCDC86	9.11461e-60	0.639074	0.898	0.514	1.60208e-55	0	CCDC86
KCTD12	2.80743e-59	0.697168	1	0.699	4.93462e-55	0	KCTD12
ADCY1	7.01755e-59	0.685071	0.858	0.38	1.23347e-54	0	ADCY1
CD99L2	2.74782e-58	0.587889	0.978	0.657	4.82984e-54	0	CD99L2
HMP19	3.89688e-57	0.581683	0.551	0.146	6.84954e-53	0	HMP19
SPOCK3	5.50553e-57	0.585716	0.638	0.185	9.67706e-53	0	SPOCK3
FABP5	1.43553e-56	0.717031	0.929	0.455	2.52323e-52	0	FABP5
MUC13	2.29468e-56	0.711681	0.96	0.606	4.03336e-52	0	MUC13
GALNT13	2.19444e-55	0.552859	0.557	0.157	3.85717e-51	0	GALNT13
ENPP2	2.67946e-55	0.628519	0.997	0.694	4.70968e-51	0	ENPP2
SPTSSB	4.61024e-55	0.666406	0.768	0.304	8.10341e-51	0	SPTSSB
TMEM176A	8.07965e-55	0.644806	1	0.649	1.42016e-50	0	TMEM176A
NUPR1L	4.31727e-54	0.608377	0.789	0.357	7.58846e-50	0	NUPR1L
BTBD11	4.75431e-54	0.559501	0.625	0.195	8.35666e-50	0	BTBD11
SERPINI1	9.29331e-54	0.743445	0.709	0.309	1.63349e-49	0	SERPINI1
GPX3	1.14485e-53	0.646259	0.923	0.453	2.0123e-49	0	GPX3
MRC1	3.06484e-53	0.472383	0.344	0.059	5.38707e-49	0	MRC1
TBC1D30	3.86364e-53	0.648561	0.752	0.326	6.79112e-49	0	TBC1D30
VSNL1	6.45398e-53	0.337265	0.282	0.037	1.13442e-48	0	VSNL1
SLC7A8	7.35584e-53	0.573756	0.985	0.663	1.29294e-48	0	SLC7A8
SLC22A17	1.14059e-52	0.548069	1	0.779	2.00482e-48	0	SLC22A17
CNIH2	1.1657e-52	0.630585	0.978	0.638	2.04895e-48	0	CNIH2
SERPINE2	1.47367e-52	0.63055	0.954	0.559	2.59026e-48	0	SERPINE2
LPPR4	8.02484e-52	0.599091	0.647	0.218	1.41053e-47	0	LPPR4
CAMK2G	8.26555e-52	0.618573	0.858	0.449	1.45284e-47	0	CAMK2G
XIST	1.05721e-51	0.735634	0.632	0.228	1.85826e-47	0	XIST
PLIN3	1.15224e-51	0.56463	0.954	0.639	2.0253e-47	0	PLIN3
CECR1	1.82574e-51	0.529779	0.978	0.764	3.2091e-47	0	CECR1
SMARCA1	1.99225e-51	0.467715	1	0.849	3.50178e-47	0	SMARCA1
LPPR5	2.12794e-51	0.399979	0.347	0.061	3.74027e-47	0	LPPR5
REC8	5.3087e-51	0.58828	0.916	0.477	9.3311e-47	0	REC8
TMEM164	7.60836e-51	0.570465	0.907	0.522	1.33732e-46	0	TMEM164
PCDH17	9.60449e-51	0.589479	0.988	0.61	1.68818e-46	0	PCDH17
LIPC	1.80739e-49	0.390184	0.282	0.042	3.17684e-45	0	LIPC
ITPR1	9.73804e-49	0.568051	0.74	0.311	1.71166e-44	0	ITPR1
LPPR1	1.04106e-48	0.395191	0.402	0.087	1.82988e-44	0	LPPR1
C2CD4A	1.11867e-48	0.687386	0.786	0.377	1.96628e-44	0	C2CD4A
APOH	1.70888e-48	0.526065	0.526	0.148	3.0037e-44	0	APOH
TM4SF4	1.46033e-47	0.732303	0.997	0.706	2.56682e-43	0	TM4SF4
C2orf54	8.65053e-47	0.410094	0.316	0.058	1.5205e-42	0	C2orf54
HIGD1A	8.89382e-47	0.418504	0.997	0.819	1.56327e-42	0	HIGD1A
SLC7A14	1.10926e-46	0.576267	0.861	0.414	1.94974e-42	0	SLC7A14
2021-03-04	3.10636e-46	0.524277	0.706	0.26	5.46005e-42	0	2021-03-04
MPC2	3.78841e-46	0.374801	1	0.87	6.65889e-42	0	MPC2
OCRL	5.46749e-46	0.525215	0.904	0.555	9.61021e-42	0	OCRL
TMEM176B	1.64403e-45	0.559453	1	0.8	2.88971e-41	0	TMEM176B
PDK3	3.18603e-45	0.511373	0.991	0.713	5.60009e-41	0	PDK3
COL9A2	3.34546e-45	0.507962	0.573	0.195	5.88032e-41	0	COL9A2
SLC35F4	1.92949e-44	0.346804	0.316	0.058	3.39146e-40	0	SLC35F4
SYT5	2.14534e-44	0.538252	0.752	0.303	3.77086e-40	0	SYT5
CD36	2.73714e-44	0.502127	0.607	0.205	4.81108e-40	0	CD36
C2CD4B	3.49404e-44	0.604426	0.796	0.385	6.14148e-40	0	C2CD4B
PDZK1	3.54147e-44	0.481478	0.517	0.16	6.22485e-40	0	PDZK1
IQSEC3	4.18513e-44	0.523647	0.715	0.283	7.35621e-40	0	IQSEC3
GJA3	5.44644e-44	0.394692	0.337	0.068	9.5732e-40	0	GJA3
LRRTM2	8.20637e-44	0.390842	0.337	0.069	1.44243e-39	0	LRRTM2
HMGB3	1.27797e-43	0.573807	0.768	0.39	2.24628e-39	0	HMGB3
PLK2	2.81569e-43	0.498884	0.988	0.73	4.94914e-39	0	PLK2
ENPP1	4.03804e-43	0.521832	0.759	0.358	7.09766e-39	0	ENPP1
APLP1	6.18745e-43	0.458838	1	0.805	1.08757e-38	0	APLP1
LRP11	9.04999e-43	0.405686	0.997	0.85	1.59072e-38	0	LRP11
TMEM56	1.18794e-42	0.550727	0.83	0.429	2.08804e-38	0	TMEM56
PGR	1.79338e-42	0.568528	0.935	0.517	3.15222e-38	0	PGR
COTL1	1.88251e-42	0.525859	0.873	0.478	3.30888e-38	0	COTL1
PHTF2	2.74463e-42	0.468109	0.966	0.682	4.82423e-38	0	PHTF2
NAA20	5.59265e-42	0.325377	1	0.971	9.83021e-38	0	NAA20
PTPRN2	9.86339e-42	0.477138	1	0.784	1.73369e-37	0	PTPRN2
VGF	2.25797e-41	0.547803	1	0.832	3.96884e-37	0	VGF
UPB1	2.53353e-41	0.318401	0.254	0.039	4.45319e-37	0	UPB1
SLC25A53	3.2671e-41	0.519304	0.867	0.44	5.74258e-37	0	SLC25A53
FXYD6	5.29699e-41	0.555446	0.978	0.603	9.31051e-37	0	FXYD6
FABP5P3	7.38027e-41	0.432034	0.415	0.114	1.29723e-36	0	FABP5P3
FXYD5	1.59403e-40	0.363353	0.35	0.082	2.80183e-36	0	FXYD5
IL10RA	1.64063e-40	0.337717	0.325	0.069	2.88373e-36	0	IL10RA
TSPAN7	1.89893e-40	0.485839	0.988	0.673	3.33775e-36	0	TSPAN7
KCNMB2	1.93943e-40	0.52482	0.904	0.48	3.40893e-36	0	KCNMB2
FAM46C	2.27913e-40	0.524254	0.901	0.557	4.00603e-36	0	FAM46C
LCLAT1	2.57807e-40	0.487534	0.848	0.513	4.53148e-36	0	LCLAT1
TSPAN2	2.73438e-40	0.523528	0.947	0.558	4.80621e-36	0	TSPAN2
CNTN4	4.12915e-40	0.519091	0.805	0.389	7.25781e-36	0	CNTN4
EMC10	5.95257e-40	0.345657	1	0.912	1.04628e-35	0	EMC10
USP27X	2.13332e-39	0.443868	0.536	0.186	3.74973e-35	0	USP27X
CNTN1	2.81024e-39	0.527985	0.972	0.608	4.93956e-35	0	CNTN1
A1CF	3.22278e-39	0.504702	0.96	0.577	5.66469e-35	0	A1CF
PRKCQ-AS1	4.68659e-39	0.464887	0.464	0.15	8.23762e-35	0	PRKCQ-AS1
VDR	1.11056e-38	0.527903	0.684	0.302	1.95202e-34	0	VDR
FBLL1	1.13743e-38	0.427918	0.61	0.224	1.99927e-34	0	FBLL1
MAGED1	1.20804e-38	0.31657	0.994	0.92	2.12338e-34	0	MAGED1
TMED3	3.40313e-38	0.381737	0.954	0.803	5.98168e-34	0	TMED3
ARHGAP1	3.55093e-38	0.351458	0.978	0.856	6.24147e-34	0	ARHGAP1
QDPR	3.71476e-38	0.397207	0.997	0.88	6.52944e-34	0	QDPR
USP18	7.77229e-38	0.438458	0.523	0.184	1.36614e-33	0	USP18
IFIH1	8.45943e-38	0.51058	0.709	0.349	1.48691e-33	0	IFIH1
SEZ6L2	1.235e-37	0.406034	0.991	0.759	2.17077e-33	0	SEZ6L2
FKBP11	1.59537e-37	0.515312	0.861	0.506	2.80419e-33	0	FKBP11
KIAA1377	1.82034e-37	0.494408	0.981	0.638	3.19961e-33	0	KIAA1377
GDA	2.8922e-37	0.507112	0.901	0.501	5.08361e-33	0	GDA
SNED1	3.00784e-37	0.413654	0.486	0.163	5.28689e-33	0	SNED1
GRIA3	5.47977e-37	0.4882	0.774	0.366	9.63179e-33	0	GRIA3
SSTR2	5.91279e-37	0.507381	0.907	0.487	1.03929e-32	0	SSTR2
SLC7A2	6.06662e-37	0.40041	1	0.887	1.06633e-32	0	SLC7A2
GCH1	9.57216e-37	0.448547	0.997	0.817	1.6825e-32	0	GCH1
GCG	9.90153e-37	0.259365	1	1	1.74039e-32	0	GCG
SLC5A1	1.14435e-36	0.474742	0.511	0.18	2.01142e-32	0	SLC5A1
MOB1B	2.41798e-36	0.407039	0.997	0.822	4.25009e-32	0	MOB1B
KCNH6	6.19448e-36	0.369634	0.514	0.166	1.0888e-31	0	KCNH6
ADCY7	9.36926e-36	0.403673	0.467	0.15	1.64684e-31	0	ADCY7
ALDH1A1	1.05064e-35	0.364902	1	0.956	1.84672e-31	0	ALDH1A1
NPTN	1.78651e-35	0.268148	0.994	0.932	3.14014e-31	0	NPTN
TSPAN33	2.19541e-35	0.454021	0.678	0.323	3.85887e-31	0	TSPAN33
C1orf122	2.54687e-35	0.355246	0.972	0.814	4.47664e-31	0	C1orf122
MMRN1	3.75359e-35	0.484815	0.783	0.367	6.59769e-31	0	MMRN1
FGF12	4.24706e-35	0.463694	0.752	0.37	7.46505e-31	0	FGF12
CACNB2	4.91781e-35	0.441815	0.622	0.26	8.64404e-31	0	CACNB2
ST8SIA1	5.31807e-35	0.31854	0.266	0.053	9.34756e-31	0	ST8SIA1
PAPPA2	6.8888e-35	0.485954	0.582	0.219	1.21085e-30	0	PAPPA2
RFX6	7.40785e-35	0.494706	0.981	0.61	1.30208e-30	0	RFX6
PDK4	8.28032e-35	0.564013	0.923	0.729	1.45543e-30	0	PDK4
MTMR7	9.83313e-35	0.446558	0.656	0.279	1.72837e-30	0	MTMR7
PIGT	1.04498e-34	0.34898	0.975	0.799	1.83675e-30	0	PIGT
FAM135B	1.17586e-34	0.409771	0.477	0.161	2.06681e-30	0	FAM135B
PPM1K	2.92485e-34	0.424074	0.978	0.757	5.14101e-30	0	PPM1K
ENAM	2.98712e-34	0.414038	0.57	0.222	5.25046e-30	0	ENAM
CKMT1A	3.29197e-34	0.460753	0.817	0.455	5.7863e-30	0	CKMT1A
MLLT11	3.76646e-34	0.484217	0.796	0.414	6.6203e-30	0	MLLT11
ABHD15	4.2061e-34	0.426089	0.929	0.638	7.39306e-30	0	ABHD15
NUCB1	5.31351e-34	0.346094	0.975	0.818	9.33956e-30	0	NUCB1
KCNC1	5.7853e-34	0.337198	0.372	0.101	1.01688e-29	0	KCNC1
STMN1	6.03289e-34	0.413446	0.981	0.742	1.0604e-29	0	STMN1
SSTR1	6.5726e-34	0.439274	0.728	0.312	1.15527e-29	0	SSTR1
KIAA1549L	8.56094e-34	0.384942	0.489	0.166	1.50476e-29	0	KIAA1549L
C19orf77	1.16756e-33	0.477686	0.907	0.522	2.05222e-29	0	C19orf77
PCP4	1.66763e-33	0.497717	0.861	0.461	2.9312e-29	0	PCP4
LBH	1.67092e-33	0.522879	0.628	0.28	2.93697e-29	0	LBH
C14orf101	1.97221e-33	0.453511	0.805	0.485	3.46655e-29	0	C14orf101
PPP1R1A	2.20069e-33	0.519368	0.991	0.679	3.86816e-29	0	PPP1R1A
TMEM60	2.89523e-33	0.467277	0.867	0.595	5.08894e-29	0	TMEM60
GNG4	2.96548e-33	0.49039	0.978	0.578	5.21243e-29	0	GNG4
C12orf75	2.98933e-33	0.366707	0.997	0.816	5.25434e-29	0	C12orf75
NT5DC3	3.91268e-33	0.454599	0.759	0.406	6.87731e-29	0	NT5DC3
TCEAL5	4.69072e-33	0.470948	0.65	0.28	8.24489e-29	0	TCEAL5
PPP1R14C	5.07796e-33	0.40901	0.542	0.208	8.92552e-29	0	PPP1R14C
TXNDC11	7.50596e-33	0.47737	0.848	0.581	1.31932e-28	0	TXNDC11
GADD45G	1.02597e-32	0.471159	0.511	0.201	1.80334e-28	0	GADD45G
QPCT	1.15109e-32	0.434421	0.997	0.783	2.02327e-28	0	QPCT
PLP2	1.24119e-32	0.384435	0.988	0.775	2.18163e-28	0	PLP2
HS6ST3	1.28477e-32	0.465965	0.845	0.438	2.25823e-28	0	HS6ST3
WBSCR22	2.26871e-32	0.391164	0.92	0.663	3.98771e-28	0	WBSCR22
SESN3	5.30505e-32	0.444246	0.895	0.568	9.32469e-28	0	SESN3
SH3GL2	7.55788e-32	0.461867	0.935	0.531	1.32845e-27	0	SH3GL2
RGS7	9.7083e-32	0.421002	0.644	0.28	1.70643e-27	0	RGS7
STC2	1.21269e-31	0.416129	0.498	0.191	2.13154e-27	0	STC2
RIN2	2.16198e-31	0.391195	0.963	0.781	3.80011e-27	0	RIN2
PALLD	3.69359e-31	0.374891	0.985	0.815	6.49222e-27	0	PALLD
CACNG4	4.40246e-31	0.375604	0.381	0.119	7.7382e-27	0	CACNG4
IGFBP2	5.25303e-31	0.442314	0.585	0.236	9.23325e-27	0	IGFBP2
MCOLN3	5.34887e-31	0.414349	0.653	0.307	9.4017e-27	0	MCOLN3
ZDHHC14	6.36033e-31	0.445329	0.759	0.397	1.11795e-26	0	ZDHHC14
DNAJA4	1.0426e-30	0.433245	0.762	0.399	1.83258e-26	0	DNAJA4
C12orf68	1.60383e-30	0.378372	0.517	0.198	2.81905e-26	0	C12orf68
ADCY2	1.64417e-30	0.352819	0.325	0.09	2.88996e-26	0	ADCY2
CKMT1B	2.00507e-30	0.459839	0.731	0.429	3.52431e-26	0	CKMT1B
PRLR	2.52866e-30	0.442815	0.545	0.226	4.44462e-26	0	PRLR
TXNIP	3.25268e-30	0.526874	0.731	0.409	5.71724e-26	0	TXNIP
TMEM178B	3.91178e-30	0.43642	0.83	0.453	6.87574e-26	0	TMEM178B
NR4A2	4.40136e-30	0.505835	0.563	0.257	7.73627e-26	0	NR4A2
SYDE2	5.78558e-30	0.346371	0.44	0.154	1.01693e-25	0	SYDE2
GPC6	6.04565e-30	0.396717	0.728	0.316	1.06264e-25	0	GPC6
DZIP3	1.10441e-29	0.39565	0.985	0.74	1.94122e-25	0	DZIP3
NPTXR	1.42759e-29	0.41572	0.805	0.49	2.50928e-25	0	NPTXR
ZNF85	1.68665e-29	0.388866	0.443	0.169	2.96462e-25	0	ZNF85
C21orf58	1.98901e-29	0.449673	0.82	0.461	3.49607e-25	0	C21orf58
ETFDH	2.25172e-29	0.402816	0.793	0.481	3.95785e-25	0	ETFDH
DAPK2	2.33179e-29	0.387102	0.508	0.21	4.09859e-25	0	DAPK2
STX11	2.60141e-29	0.394168	0.659	0.304	4.57249e-25	0	STX11
FAM83B	2.60574e-29	0.327217	0.341	0.103	4.58011e-25	0	FAM83B
FAM110B	3.46742e-29	0.397662	0.563	0.246	6.09468e-25	0	FAM110B
PTP4A3	3.65239e-29	0.455173	0.712	0.372	6.4198e-25	0	PTP4A3
CELF3	4.26204e-29	0.405764	0.681	0.311	7.49138e-25	0	CELF3
ARNT2	5.381e-29	0.41859	0.814	0.493	9.45819e-25	0	ARNT2
SEZ6L	5.91436e-29	0.43959	0.783	0.392	1.03957e-24	0	SEZ6L
CHGB	1.72243e-28	0.421025	1	0.917	3.02751e-24	0	CHGB
RAB3C	1.73297e-28	0.393475	0.523	0.218	3.04605e-24	0	RAB3C
HMGN3	2.41982e-28	0.318217	0.975	0.789	4.25332e-24	0	HMGN3
LDB2	2.473e-28	0.410497	0.455	0.166	4.3468e-24	0	LDB2
MAFB	2.9189e-28	0.469874	0.997	0.757	5.13055e-24	0	MAFB
HSD17B14	3.8226e-28	0.418472	0.752	0.392	6.71898e-24	0	HSD17B14
2021-09-03	4.38455e-28	0.441503	0.802	0.423	7.70672e-24	0	2021-09-03
CHKA	5.01427e-28	0.362758	0.92	0.676	8.81358e-24	0	CHKA
MBOAT4	5.94857e-28	0.32246	0.31	0.089	1.04558e-23	0	MBOAT4
DACH1	6.12821e-28	0.428261	0.873	0.501	1.07715e-23	0	DACH1
LINC00617	6.52844e-28	0.437542	0.765	0.402	1.1475e-23	0	LINC00617
RGAG4	6.93087e-28	0.408321	0.793	0.419	1.21824e-23	0	RGAG4
SLC29A4	9.02239e-28	0.419606	0.941	0.593	1.58587e-23	0	SLC29A4
NCALD	1.06267e-27	0.418228	0.817	0.441	1.86786e-23	0	NCALD
APH1B	1.07125e-27	0.371953	0.901	0.652	1.88294e-23	0	APH1B
CORO2B	1.20783e-27	0.331375	0.393	0.133	2.123e-23	0	CORO2B
IRX1	1.53656e-27	0.340071	0.279	0.073	2.70081e-23	0	IRX1
TTC8	1.60899e-27	0.3961	0.892	0.613	2.82812e-23	0	TTC8
C3orf80	1.70937e-27	0.324569	0.396	0.131	3.00455e-23	0	C3orf80
CHID1	1.80289e-27	0.386928	0.703	0.394	3.16894e-23	0	CHID1
CES4A	2.14751e-27	0.358185	0.477	0.189	3.77468e-23	0	CES4A
SH3KBP1	2.32839e-27	0.404317	0.885	0.551	4.09261e-23	0	SH3KBP1
KL	2.46126e-27	0.357083	0.539	0.217	4.32615e-23	0	KL
RCAN2	2.84749e-27	0.369365	0.969	0.718	5.00503e-23	0	RCAN2
RIMBP2	4.86576e-27	0.416	0.95	0.592	8.55254e-23	0	RIMBP2
ZNF185	5.91255e-27	0.281811	0.266	0.072	1.03925e-22	0	ZNF185
CHST9	6.19752e-27	0.419569	0.765	0.409	1.08934e-22	0	CHST9
CSRNP3	7.33366e-27	0.411578	0.817	0.447	1.28904e-22	0	CSRNP3
MAOB	7.42219e-27	0.382462	0.607	0.271	1.3046e-22	0	MAOB
KCNIP1	8.67972e-27	0.366555	0.471	0.177	1.52563e-22	0	KCNIP1
SGSM1	9.11271e-27	0.360268	0.932	0.76	1.60174e-22	0	SGSM1
KLHL3	1.12119e-26	0.378459	0.56	0.245	1.97072e-22	0	KLHL3
PAK6	1.16048e-26	0.35815	0.443	0.176	2.03978e-22	0	PAK6
SAMD5	1.54082e-26	0.421257	0.777	0.432	2.7083e-22	0	SAMD5
NIPSNAP3A	1.66188e-26	0.372665	0.876	0.597	2.92108e-22	0	NIPSNAP3A
LGI3	1.88572e-26	0.326324	0.402	0.142	3.31454e-22	0	LGI3
PARM1	1.89879e-26	0.354598	0.981	0.766	3.33749e-22	0	PARM1
CNNM1	2.01987e-26	0.391416	0.796	0.449	3.55032e-22	0	CNNM1
ASTN1	2.52595e-26	0.302494	0.3	0.087	4.43986e-22	0	ASTN1
GNAI1	3.88422e-26	0.363276	0.96	0.698	6.8273e-22	0	GNAI1
BEX5	4.07472e-26	0.389832	0.898	0.597	7.16213e-22	0	BEX5
KIF12	4.98224e-26	0.409582	0.632	0.317	8.75727e-22	0	KIF12
TMEM59L	5.11732e-26	0.322653	0.378	0.131	8.99472e-22	0	TMEM59L
WFS1	5.79707e-26	0.369825	0.895	0.607	1.01895e-21	0	WFS1
OSBPL6	9.9475e-26	0.366984	0.554	0.246	1.74847e-21	0	OSBPL6
CSGALNACT1	9.96357e-26	0.355102	0.489	0.2	1.7513e-21	0	CSGALNACT1
RAB3GAP2	1.04836e-25	0.31125	0.966	0.814	1.84269e-21	0	RAB3GAP2
GPR137B	1.30772e-25	0.370221	0.731	0.401	2.29858e-21	0	GPR137B
ANK2	1.4091e-25	0.321998	0.347	0.114	2.47677e-21	0	ANK2
NPNT	1.4216e-25	0.485411	0.693	0.383	2.49875e-21	0	NPNT
LINC00643	1.92716e-25	0.425365	0.814	0.467	3.38737e-21	0	LINC00643
MAPK10	2.06782e-25	0.385576	0.684	0.337	3.63461e-21	0	MAPK10
RTN1	2.28491e-25	0.398342	0.978	0.653	4.01619e-21	0	RTN1
P4HA2	2.41591e-25	0.371776	0.889	0.617	4.24645e-21	0	P4HA2
RIIAD1	2.54729e-25	0.258361	0.313	0.094	4.47738e-21	0	RIIAD1
PTPRD	2.85163e-25	0.37119	0.446	0.18	5.0123e-21	0	PTPRD
CRH	3.62925e-25	0.349983	0.406	0.145	6.37914e-21	0	CRH
P4HTM	3.84017e-25	0.353665	0.935	0.651	6.74987e-21	0	P4HTM
NENF	4.61389e-25	0.253351	0.975	0.877	8.10983e-21	0	NENF
USH1C	5.15615e-25	0.381332	0.91	0.588	9.06297e-21	0	USH1C
RAB26	5.70335e-25	0.405852	0.796	0.455	1.00248e-20	0	RAB26
MYH10	6.55718e-25	0.35071	0.994	0.806	1.15256e-20	0	MYH10
SCN3B	6.75349e-25	0.368128	0.786	0.434	1.18706e-20	0	SCN3B
AAED1	7.53091e-25	0.369013	0.641	0.337	1.32371e-20	0	AAED1
REEP4	1.03807e-24	0.386119	0.805	0.516	1.82462e-20	0	REEP4
SERPINA10	1.06488e-24	0.270102	0.254	0.067	1.87173e-20	0	SERPINA10
NOL4	1.52847e-24	0.404205	0.935	0.591	2.6866e-20	0	NOL4
KIAA1324	1.55521e-24	0.304268	1	0.905	2.73359e-20	0	KIAA1324
APOL4	1.59378e-24	0.473369	0.437	0.187	2.80139e-20	0	APOL4
HECW2	1.82257e-24	0.284971	0.297	0.091	3.20353e-20	0	HECW2
AP3B2	2.42566e-24	0.35716	0.638	0.304	4.26358e-20	0	AP3B2
AQP7	2.62079e-24	0.275368	0.279	0.082	4.60656e-20	0	AQP7
CPLX2	3.56351e-24	0.40176	0.944	0.582	6.26357e-20	0	CPLX2
SLC35F3	4.5673e-24	0.348208	0.61	0.288	8.02795e-20	0	SLC35F3
STXBP6	4.79669e-24	0.33808	0.601	0.286	8.43114e-20	0	STXBP6
KCNC4	6.01303e-24	0.371071	0.57	0.286	1.05691e-19	0	KCNC4
TOX	1.0202e-23	0.342906	0.693	0.336	1.79321e-19	0	TOX
ZNRF1	1.0723e-23	0.357671	0.802	0.507	1.88478e-19	0	ZNRF1
CDO1	1.09806e-23	0.299662	0.344	0.12	1.93006e-19	0	CDO1
HOPX	1.1847e-23	0.411876	0.625	0.31	2.08234e-19	0	HOPX
EGFEM1P	1.97256e-23	0.383645	0.715	0.422	3.46717e-19	0	EGFEM1P
MAMLD1	2.18665e-23	0.334512	0.511	0.231	3.84347e-19	0	MAMLD1
MMP16	2.18951e-23	0.276095	0.334	0.113	3.84851e-19	0	MMP16
SYP	2.67934e-23	0.381746	0.941	0.568	4.70947e-19	0	SYP
MBOAT2	3.1593e-23	0.36387	0.842	0.557	5.5531e-19	0	MBOAT2
L1CAM	3.4893e-23	0.320846	0.495	0.208	6.13314e-19	0	L1CAM
LMCD1	3.53489e-23	0.378299	0.529	0.247	6.21328e-19	0	LMCD1
CACNA2D2	3.76633e-23	0.383792	0.861	0.486	6.62008e-19	0	CACNA2D2
C1orf21	4.37617e-23	0.357479	0.533	0.255	7.69199e-19	0	C1orf21
C1orf168	4.72772e-23	0.293688	0.337	0.114	8.30991e-19	0	C1orf168
ATP2B1	7.66889e-23	0.271638	0.988	0.835	1.34796e-18	0	ATP2B1
BCKDHB	8.31543e-23	0.363498	0.721	0.423	1.4616e-18	0	BCKDHB
NUCB2	8.77106e-23	0.261572	0.994	0.88	1.54169e-18	0	NUCB2
AP1S2	1.02541e-22	0.406927	0.601	0.313	1.80237e-18	0	AP1S2
KCNJ8	1.06707e-22	0.346832	0.613	0.292	1.87558e-18	0	KCNJ8
G6PC3	1.13708e-22	0.278538	0.972	0.805	1.99865e-18	0	G6PC3
HIST2H2BE	1.33617e-22	0.415858	0.542	0.266	2.34858e-18	0	HIST2H2BE
NME4	1.43904e-22	0.33215	0.916	0.664	2.5294e-18	0	NME4
BTG2	1.63373e-22	0.335634	0.96	0.774	2.8716e-18	0	BTG2
CTAGE5	1.72941e-22	0.286745	0.954	0.796	3.03978e-18	0	CTAGE5
PCSK2	1.9248e-22	0.34009	1	0.929	3.38323e-18	0	PCSK2
SPRED3	2.17667e-22	0.293682	0.353	0.128	3.82593e-18	0	SPRED3
SYT4	2.52016e-22	0.395268	0.95	0.566	4.42969e-18	0	SYT4
RAB27A	3.08335e-22	0.274553	0.988	0.821	5.41961e-18	0	RAB27A
NT5C3	3.29353e-22	0.32746	0.898	0.653	5.78904e-18	0	NT5C3
SCG2	3.34231e-22	0.369748	1	0.89	5.87478e-18	0	SCG2
PPP1R3B	3.96735e-22	0.326829	0.814	0.525	6.97341e-18	0	PPP1R3B
PRKCE	4.32212e-22	0.339164	0.675	0.366	7.59699e-18	0	PRKCE
SLC8A2	4.61427e-22	0.359608	0.693	0.368	8.1105e-18	0	SLC8A2
GSTA4	5.43485e-22	0.294801	0.975	0.769	9.55283e-18	0	GSTA4
KLKB1	5.66539e-22	0.302241	0.294	0.1	9.95805e-18	0	KLKB1
PPAPDC1B	6.01982e-22	0.279285	0.969	0.838	1.0581e-17	0	PPAPDC1B
IVNS1ABP	6.08099e-22	0.357147	0.873	0.667	1.06886e-17	0	IVNS1ABP
UNC13A	6.50522e-22	0.369544	0.92	0.597	1.14342e-17	0	UNC13A
PAK3	8.25957e-22	0.369495	0.969	0.686	1.45178e-17	0	PAK3
HERC5	8.60205e-22	0.361798	0.607	0.316	1.51198e-17	0	HERC5
2021-09-06	8.98721e-22	0.354353	0.706	0.4	1.57968e-17	0	2021-09-06
TMEM61	1.00146e-21	0.321489	0.523	0.245	1.76026e-17	0	TMEM61
TRAK1	1.29952e-21	0.265006	0.978	0.819	2.28417e-17	0	TRAK1
KANK1	1.38791e-21	0.378556	0.672	0.394	2.43954e-17	0	KANK1
CACNA1A	1.41033e-21	0.334705	0.923	0.581	2.47894e-17	0	CACNA1A
LOC728392	1.4396e-21	0.383018	0.963	0.635	2.53039e-17	0	LOC728392
MAP7D2	1.45581e-21	0.351412	0.573	0.281	2.55888e-17	0	MAP7D2
FAM131C	1.73436e-21	0.335818	0.591	0.291	3.04848e-17	0	FAM131C
LHPP	2.23978e-21	0.34556	0.588	0.322	3.93686e-17	0	LHPP
SDC2	2.55244e-21	0.308624	0.963	0.771	4.48643e-17	0	SDC2
SSBP2	2.65895e-21	0.344405	0.879	0.621	4.67364e-17	0	SSBP2
TMX4	3.22488e-21	0.268964	0.991	0.842	5.66837e-17	0	TMX4
SMARCA2	3.28152e-21	0.259709	0.991	0.88	5.76793e-17	0	SMARCA2
ATP5E	4.0412e-21	0.384053	0.69	0.429	7.10322e-17	0	ATP5E
LOC653513	4.86033e-21	0.257457	0.269	0.087	8.54301e-17	0	LOC653513
TMEM145	7.44991e-21	0.270505	0.437	0.175	1.30947e-16	0	TMEM145
PEMT	8.76275e-21	0.356193	0.777	0.46	1.54023e-16	0	PEMT
LOC550643	9.59464e-21	0.300424	0.907	0.694	1.68645e-16	0	LOC550643
LRRC4	1.00243e-20	0.294906	0.402	0.164	1.76197e-16	0	LRRC4
IFI27L1	1.01194e-20	0.326069	0.486	0.24	1.77869e-16	0	IFI27L1
NDUFB1	1.12612e-20	0.255047	0.947	0.798	1.97937e-16	0	NDUFB1
MBD4	1.21025e-20	0.312319	0.879	0.654	2.12725e-16	0	MBD4
BSN	1.22545e-20	0.333602	0.681	0.353	2.15397e-16	0	BSN
VWA5B2	1.45517e-20	0.321751	0.712	0.369	2.55774e-16	0	VWA5B2
CHGA	1.52398e-20	0.29984	1	0.963	2.6787e-16	0	CHGA
PKIA	1.726e-20	0.309178	0.52	0.243	3.03378e-16	0	PKIA
CPNE8	2.18968e-20	0.340026	0.672	0.378	3.8488e-16	0	CPNE8
RUNDC3A	2.4419e-20	0.362472	0.882	0.555	4.29212e-16	0	RUNDC3A
USP13	2.56857e-20	0.341779	0.675	0.387	4.51478e-16	0	USP13
YIPF2	2.56997e-20	0.330056	0.529	0.27	4.51724e-16	0	YIPF2
GYG2	2.70862e-20	0.31273	0.526	0.258	4.76095e-16	0	GYG2
FAM47E	2.72734e-20	0.336662	0.814	0.507	4.79384e-16	0	FAM47E
PELI3	2.88607e-20	0.332956	0.57	0.294	5.07284e-16	0	PELI3
GNAZ	2.89842e-20	0.346207	0.752	0.428	5.09455e-16	0	GNAZ
MIA2	3.20451e-20	0.335113	0.684	0.374	5.63257e-16	0	MIA2
DDX25	3.37336e-20	0.299762	0.461	0.2	5.92936e-16	0	DDX25
TRNP1	3.55161e-20	0.31651	0.926	0.707	6.24267e-16	0	TRNP1
PTPLA	4.77906e-20	0.292903	0.415	0.184	8.40016e-16	0	PTPLA
CNTN3	4.88524e-20	0.263517	0.362	0.141	8.58679e-16	0	CNTN3
GYLTL1B	5.5393e-20	0.307396	0.449	0.211	9.73643e-16	0	GYLTL1B
IFI27L2	6.72381e-20	0.322991	0.802	0.522	1.18184e-15	0	IFI27L2
DYNC1I1	8.22042e-20	0.302357	0.588	0.287	1.4449e-15	0	DYNC1I1
TOX3	9.28607e-20	0.322887	0.703	0.384	1.63221e-15	0	TOX3
RGS17	1.02609e-19	0.323994	0.659	0.366	1.80356e-15	0	RGS17
GRAMD4	1.20588e-19	0.367772	0.644	0.383	2.11957e-15	0	GRAMD4
KIAA1244	1.23477e-19	0.275549	1	0.922	2.17036e-15	0	KIAA1244
GNG2	1.36297e-19	0.352555	0.913	0.611	2.39569e-15	0	GNG2
VPS41	1.46472e-19	0.296952	0.907	0.706	2.57453e-15	0	VPS41
HTR1F	1.46683e-19	0.296751	0.483	0.217	2.57824e-15	0	HTR1F
ACVR1C	1.60632e-19	0.351317	0.786	0.455	2.82343e-15	0	ACVR1C
TMEM45B	1.91597e-19	0.388576	0.526	0.276	3.3677e-15	0	TMEM45B
NOVA1	2.06031e-19	0.321546	0.715	0.395	3.62141e-15	0	NOVA1
PGAP1	2.20619e-19	0.319239	0.681	0.388	3.87782e-15	0	PGAP1
SLC37A4	2.29245e-19	0.318638	0.839	0.58	4.02944e-15	0	SLC37A4
TPCN1	2.73152e-19	0.334701	0.715	0.438	4.8012e-15	0	TPCN1
GGA2	2.80885e-19	0.303008	0.913	0.715	4.93711e-15	0	GGA2
KCNK16	2.97342e-19	0.370136	0.718	0.4	5.22639e-15	0	KCNK16
KSR2	3.02411e-19	0.29941	0.502	0.237	5.31547e-15	0	KSR2
IL6R	3.23421e-19	0.354961	0.808	0.521	5.68477e-15	0	IL6R
ALPK3	3.63872e-19	0.305386	0.947	0.735	6.39578e-15	0	ALPK3
LOC729013	3.70323e-19	0.332054	0.709	0.433	6.50917e-15	0	LOC729013
SCG5	4.1894e-19	0.350043	1	0.87	7.36371e-15	0	SCG5
C10orf10	4.46085e-19	0.387097	0.885	0.732	7.84084e-15	0	C10orf10
PAM	6.09562e-19	0.267239	0.997	0.935	1.07143e-14	0	PAM
FHL1	6.69954e-19	0.351509	0.718	0.428	1.17758e-14	0	FHL1
TBL1X	6.75728e-19	0.304427	0.867	0.644	1.18773e-14	0	TBL1X
IMMP1L	7.09734e-19	0.315462	0.789	0.492	1.2475e-14	0	IMMP1L
NLGN2	7.55872e-19	0.32127	0.675	0.402	1.3286e-14	0	NLGN2
UCP2	9.06402e-19	0.342983	0.526	0.275	1.59318e-14	0	UCP2
DIRAS3	9.1517e-19	0.304184	0.656	0.357	1.60859e-14	0	DIRAS3
EDIL3	1.11148e-18	0.296001	0.449	0.203	1.95364e-14	0	EDIL3
MAGEH1	1.44965e-18	0.311412	0.87	0.618	2.54804e-14	0	MAGEH1
PCK2	1.55639e-18	0.307919	0.731	0.43	2.73567e-14	0	PCK2
TMEM80	1.64205e-18	0.32464	0.771	0.54	2.88624e-14	0	TMEM80
NRXN1	1.7806e-18	0.326648	0.721	0.394	3.12976e-14	0	NRXN1
SIK3	1.87512e-18	0.273151	0.929	0.726	3.2959e-14	0	SIK3
CXorf57	1.94074e-18	0.326471	0.885	0.555	3.41124e-14	0	CXorf57
TCTN1	2.28349e-18	0.311787	0.861	0.601	4.01368e-14	0	TCTN1
CALY	2.6932e-18	0.250112	0.375	0.15	4.73383e-14	0	CALY
AIG1	2.70665e-18	0.293687	0.861	0.663	4.75748e-14	0	AIG1
C8orf76	3.97015e-18	0.315352	0.669	0.418	6.97833e-14	0	C8orf76
VPS26B	4.32662e-18	0.284696	0.923	0.697	7.60491e-14	0	VPS26B
C19orf21	5.11409e-18	0.260426	0.427	0.191	8.98904e-14	0	C19orf21
PDE4D	5.46157e-18	0.316688	0.622	0.339	9.5998e-14	0	PDE4D
PLD3	6.27363e-18	0.298311	0.641	0.371	1.10272e-13	0	PLD3
WNK3	6.69087e-18	0.304156	0.604	0.319	1.17605e-13	0	WNK3
NMB	6.71331e-18	0.266939	0.381	0.166	1.18e-13	0	NMB
RNF150	7.48364e-18	0.295297	0.458	0.217	1.3154e-13	0	RNF150
SLC25A33	7.98275e-18	0.317291	0.672	0.421	1.40313e-13	0	SLC25A33
SMAP2	8.316e-18	0.302636	0.786	0.505	1.4617e-13	0	SMAP2
PRUNE	9.24857e-18	0.324624	0.669	0.406	1.62562e-13	0	PRUNE
LOC730102	9.40366e-18	0.296644	0.498	0.254	1.65288e-13	0	LOC730102
NAP1L5	1.01116e-17	0.307751	0.799	0.495	1.77731e-13	0	NAP1L5
NAAA	1.09429e-17	0.338565	0.635	0.396	1.92344e-13	0	NAAA
EMB	1.13665e-17	0.32611	0.737	0.428	1.99789e-13	0	EMB
CRELD1	1.18874e-17	0.312557	0.746	0.496	2.08946e-13	0	CRELD1
DPP6	1.26169e-17	0.35448	0.947	0.61	2.21767e-13	0	DPP6
CERCAM	1.29034e-17	0.316788	0.768	0.489	2.26803e-13	0	CERCAM
FBLN7	1.29763e-17	0.265327	0.347	0.144	2.28084e-13	0	FBLN7
ESYT1	1.41499e-17	0.279237	0.929	0.764	2.48712e-13	0	ESYT1
PITRM1	1.6872e-17	0.262908	0.957	0.768	2.96559e-13	0	PITRM1
CITED2	1.73658e-17	0.361552	0.638	0.396	3.05239e-13	0	CITED2
USP25	1.83995e-17	0.307588	0.805	0.572	3.23408e-13	0	USP25
TEX30	2.06843e-17	0.307043	0.604	0.354	3.63568e-13	0	TEX30
NMNAT3	2.13696e-17	0.269518	0.396	0.181	3.75614e-13	0	NMNAT3
PRRT3	2.67937e-17	0.292421	0.502	0.257	4.70953e-13	0	PRRT3
ZBTB41	2.70564e-17	0.291127	0.864	0.641	4.75571e-13	0	ZBTB41
ST7	2.80153e-17	0.301717	0.628	0.368	4.92425e-13	0	ST7
FKBP1B	3.08181e-17	0.306961	0.492	0.262	5.41689e-13	0	FKBP1B
C18orf42	3.20066e-17	0.266595	0.437	0.199	5.6258e-13	0	C18orf42
IFI6	3.45224e-17	0.292694	0.839	0.562	6.068e-13	0	IFI6
SYNGR4	3.48385e-17	0.335271	0.458	0.22	6.12357e-13	0	SYNGR4
RAB3B	3.51084e-17	0.329629	1	0.83	6.171e-13	0	RAB3B
B3GNT1	4.05155e-17	0.303407	0.613	0.353	7.12142e-13	0	B3GNT1
C11orf70	4.76714e-17	0.282039	0.433	0.212	8.3792e-13	0	C11orf70
LDLRAP1	5.50768e-17	0.305831	0.858	0.599	9.68085e-13	0	LDLRAP1
KCNMA1	5.648e-17	0.340263	0.941	0.618	9.92749e-13	0	KCNMA1
FAM153C	6.87182e-17	0.258334	0.542	0.286	1.20786e-12	0	FAM153C
KIRREL2	6.98522e-17	0.259935	0.443	0.21	1.22779e-12	0	KIRREL2
QSOX2	7.28364e-17	0.292152	0.755	0.488	1.28025e-12	0	QSOX2
RFX2	7.84021e-17	0.266024	0.52	0.258	1.37807e-12	0	RFX2
LOC100130899	7.9209e-17	0.254579	0.393	0.184	1.39226e-12	0	LOC100130899
FAM167A	8.28451e-17	0.310087	0.895	0.541	1.45617e-12	0	FAM167A
IRF6	9.08738e-17	0.281101	0.947	0.727	1.59729e-12	0	IRF6
CLSTN3	1.04844e-16	0.313672	0.557	0.32	1.84285e-12	0	CLSTN3
LGMN	1.06993e-16	0.265993	0.901	0.687	1.88062e-12	0	LGMN
CKB	1.28436e-16	0.294811	0.907	0.652	2.25751e-12	0	CKB
CDKN2A	1.28874e-16	0.428707	0.427	0.226	2.26522e-12	0	CDKN2A
SLC9A7	1.34605e-16	0.295565	0.746	0.492	2.36595e-12	0	SLC9A7
LIMCH1	1.36405e-16	0.282284	0.954	0.738	2.39759e-12	0	LIMCH1
PITPNM2	1.36762e-16	0.261031	0.402	0.194	2.40387e-12	0	PITPNM2
RASSF5	1.60596e-16	0.317193	0.765	0.504	2.82279e-12	0	RASSF5
LOC100131564	1.61866e-16	0.298089	0.824	0.588	2.84512e-12	0	LOC100131564
STMN2	1.7004e-16	0.347862	0.861	0.534	2.9888e-12	0	STMN2
FKBP5	1.7775e-16	0.305572	0.805	0.51	3.12431e-12	0	FKBP5
SCGB2A1	1.84677e-16	0.280903	0.653	0.343	3.24606e-12	0	SCGB2A1
HPS1	2.41718e-16	0.255871	0.926	0.751	4.24868e-12	0	HPS1
RNF144A	2.79714e-16	0.303832	0.545	0.311	4.91653e-12	0	RNF144A
FBXL16	3.19837e-16	0.306596	0.929	0.572	5.62178e-12	0	FBXL16
PBXIP1	3.25907e-16	0.308695	0.799	0.563	5.72847e-12	0	PBXIP1
MTSS1L	3.28148e-16	0.291587	0.824	0.529	5.76786e-12	0	MTSS1L
CPQ	3.31176e-16	0.284833	0.613	0.364	5.82108e-12	0	CPQ
ZFP36	3.86222e-16	0.315601	0.827	0.573	6.78863e-12	0	ZFP36
RNASE4	4.91797e-16	0.302636	0.601	0.337	8.64432e-12	0	RNASE4
ID4	4.96059e-16	0.272856	0.864	0.575	8.71923e-12	0	ID4
MIR7-3HG	5.52363e-16	0.337251	0.969	0.672	9.70889e-12	0	MIR7-3HG
NEURL	6.6707e-16	0.294892	0.774	0.463	1.17251e-11	0	NEURL
FAM46A	7.50087e-16	0.251627	0.963	0.783	1.31843e-11	0	FAM46A
NAPB	8.18431e-16	0.281194	0.65	0.374	1.43856e-11	0	NAPB
THRB	9.28452e-16	0.313861	0.576	0.335	1.63194e-11	0	THRB
WDR59	1.00741e-15	0.279006	0.768	0.522	1.77072e-11	0	WDR59
FLVCR1	1.40392e-15	0.275093	0.817	0.556	2.46767e-11	0	FLVCR1
R3HDM1	1.55671e-15	0.276875	0.762	0.514	2.73622e-11	0	R3HDM1
CTNND2	1.67966e-15	0.322249	0.591	0.363	2.95234e-11	0	CTNND2
PMM1	1.81384e-15	0.282187	0.622	0.38	3.18818e-11	0	PMM1
DHRS1	1.99122e-15	0.275747	0.632	0.388	3.49996e-11	0	DHRS1
SNCA	2.0417e-15	0.258922	0.467	0.229	3.5887e-11	0	SNCA
FAM63A	2.10807e-15	0.280938	0.52	0.291	3.70536e-11	0	FAM63A
MLYCD	2.17202e-15	0.286009	0.7	0.466	3.81777e-11	0	MLYCD
TCEAL1	2.77121e-15	0.286913	0.749	0.516	4.87096e-11	0	TCEAL1
SYN1	2.85498e-15	0.274723	0.557	0.297	5.0182e-11	0	SYN1
C1GALT1C1	2.88238e-15	0.275881	0.802	0.587	5.06636e-11	0	C1GALT1C1
HEPACAM2	3.0786e-15	0.280798	0.858	0.501	5.41126e-11	0	HEPACAM2
TNFRSF19	3.32246e-15	0.286682	0.523	0.296	5.83989e-11	0	TNFRSF19
MAP7D3	3.80021e-15	0.299885	0.545	0.314	6.67962e-11	0	MAP7D3
TCTA	4.579e-15	0.255445	0.907	0.72	8.04851e-11	0	TCTA
CACNA1C	6.87259e-15	0.270569	0.669	0.383	1.20799e-10	0	CACNA1C
TMEM163	6.94352e-15	0.296476	0.619	0.378	1.22046e-10	0	TMEM163
EPHX2	7.44569e-15	0.292152	0.755	0.48	1.30873e-10	0	EPHX2
SH3RF1	7.54567e-15	0.292389	0.728	0.471	1.3263e-10	0	SH3RF1
HIST1H1C	8.21143e-15	0.310959	0.554	0.329	1.44332e-10	0	HIST1H1C
MFSD3	8.97841e-15	0.275543	0.61	0.389	1.57814e-10	0	MFSD3
LGALSL	1.06311e-14	0.298522	0.69	0.459	1.86863e-10	0	LGALSL
NPDC1	1.15234e-14	0.275646	0.663	0.413	2.02547e-10	0	NPDC1
PPP1R3E	1.46637e-14	0.254583	0.625	0.355	2.57744e-10	0	PPP1R3E
SV2A	1.63457e-14	0.287723	0.889	0.576	2.87308e-10	0	SV2A
STARD13	1.77647e-14	0.263677	0.61	0.354	3.12251e-10	0	STARD13
SOCS1	1.85238e-14	0.317635	0.276	0.119	3.25593e-10	0	SOCS1
ZCCHC18	1.99289e-14	0.252657	0.418	0.205	3.5029e-10	0	ZCCHC18
NSG1	2.06543e-14	0.252527	0.498	0.251	3.63041e-10	0	NSG1
ARFIP2	2.14795e-14	0.256492	0.842	0.639	3.77546e-10	0	ARFIP2
SOWAHA	2.26602e-14	0.260132	0.598	0.332	3.98298e-10	0	SOWAHA
BCAR3	2.39584e-14	0.251524	0.483	0.256	4.21117e-10	0	BCAR3
OXCT1	3.03337e-14	0.280845	0.771	0.529	5.33175e-10	0	OXCT1
NFASC	3.22028e-14	0.281821	0.718	0.425	5.66029e-10	0	NFASC
TVP23B	3.68044e-14	0.263509	0.737	0.515	6.4691e-10	0	TVP23B
TAOK2	3.8554e-14	0.25046	0.514	0.287	6.77664e-10	0	TAOK2
C3orf14	4.31668e-14	0.275126	0.817	0.546	7.58743e-10	0	C3orf14
GRIA2	4.57626e-14	0.255977	0.579	0.309	8.04369e-10	0	GRIA2
PEG10	4.93584e-14	0.253195	0.969	0.871	8.67572e-10	0	PEG10
SLC25A14	5.07772e-14	0.250111	0.567	0.33	8.92511e-10	0	SLC25A14
VIM	5.62944e-14	0.294634	0.749	0.457	9.89487e-10	0	VIM
HSPA2	6.05546e-14	0.271785	0.467	0.257	1.06437e-09	0	HSPA2
CA8	6.61974e-14	0.257361	0.39	0.192	1.16355e-09	0	CA8
HSD11B1L	6.652e-14	0.263766	0.495	0.281	1.16922e-09	0	HSD11B1L
PREX1	7.27113e-14	0.250745	0.464	0.24	1.27805e-09	0	PREX1
SEMA5A	1.00022e-13	0.28671	0.752	0.496	1.75808e-09	0	SEMA5A
ST18	1.08702e-13	0.289505	0.839	0.498	1.91066e-09	0	ST18
GFOD2	1.11294e-13	0.25559	0.771	0.541	1.95622e-09	0	GFOD2
RSBN1L-AS1	1.13922e-13	0.261582	0.601	0.369	2.0024e-09	0	RSBN1L-AS1
GABRB3	1.31632e-13	0.269126	0.957	0.674	2.3137e-09	0	GABRB3
SLC35G2	1.45537e-13	0.266531	0.762	0.513	2.5581e-09	0	SLC35G2
SLC50A1	1.53076e-13	0.253736	0.715	0.483	2.69062e-09	0	SLC50A1
ATP2B4	1.57032e-13	0.252875	0.923	0.712	2.76015e-09	0	ATP2B4
SUOX	1.79022e-13	0.261702	0.622	0.404	3.14667e-09	0	SUOX
ISL1	1.8973e-13	0.275055	0.963	0.679	3.33489e-09	0	ISL1
TPST1	2.24383e-13	0.263366	0.74	0.504	3.94398e-09	0	TPST1
BSG	3.38314e-13	0.264137	0.663	0.442	5.94655e-09	0	BSG
CDS1	3.45036e-13	0.266583	0.777	0.49	6.0647e-09	0	CDS1
SIAE	3.52371e-13	0.284176	0.783	0.532	6.19363e-09	0	SIAE
RIMS2	3.85821e-13	0.260544	0.848	0.521	6.78158e-09	0	RIMS2
GLT8D1	3.91604e-13	0.258848	0.65	0.441	6.88322e-09	0	GLT8D1
RAB6B	4.14525e-13	0.254371	0.545	0.321	7.28611e-09	0	RAB6B
MYO10	4.26615e-13	0.284229	0.87	0.602	7.49862e-09	0	MYO10
COX11	4.43724e-13	0.256251	0.786	0.561	7.79933e-09	0	COX11
TMEM17	5.2072e-13	0.255879	0.703	0.464	9.15269e-09	0	TMEM17
HMGN5	5.33802e-13	0.253571	0.65	0.42	9.38263e-09	0	HMGN5
CD82	5.36197e-13	0.25496	0.808	0.577	9.42473e-09	0	CD82
MAOA	5.85693e-13	0.270265	0.666	0.412	1.02947e-08	0	MAOA
NMNAT2	6.22004e-13	0.266267	0.814	0.474	1.0933e-08	0	NMNAT2
SCAMP5	7.70315e-13	0.256751	0.789	0.539	1.35398e-08	0	SCAMP5
CLIP4	1.04559e-12	0.259832	0.768	0.532	1.83783e-08	0	CLIP4
ARMCX1	1.35597e-12	0.254034	0.799	0.585	2.38338e-08	0	ARMCX1
DAPK1	1.53033e-12	0.256733	0.737	0.501	2.68986e-08	0	DAPK1
MANEA	1.80759e-12	0.265856	0.548	0.341	3.1772e-08	0	MANEA
TMEM200A	1.90377e-12	0.253896	0.594	0.353	3.34626e-08	0	TMEM200A
PTPRN	1.92193e-12	0.346099	1	0.77	3.37818e-08	0	PTPRN
SLC4A8	2.12351e-12	0.26403	0.684	0.426	3.73249e-08	0	SLC4A8
PRPS1	2.6093e-12	0.253266	0.851	0.605	4.58637e-08	0	PRPS1
PDE8B	2.90789e-12	0.259628	0.69	0.432	5.11119e-08	0	PDE8B
THEM6	3.26665e-12	0.265734	0.672	0.46	5.74179e-08	0	THEM6
ELP4	4.88083e-12	0.254359	0.737	0.532	8.57903e-08	0	ELP4
PNPLA4	5.74248e-12	0.257323	0.632	0.428	1.00936e-07	0	PNPLA4
EPB41L3	9.7312e-12	0.253006	0.895	0.601	1.71045e-07	0	EPB41L3
LDHA	1.17493e-11	0.266729	0.938	0.713	2.06518e-07	0	LDHA
ARMCX4	1.95472e-11	0.255033	0.666	0.433	3.43581e-07	0	ARMCX4
NEUROD1	1.11842e-10	0.301782	1	0.777	1.96584e-06	0	NEUROD1
PAX6	1.46241e-10	0.295437	0.997	0.768	2.57048e-06	0	PAX6
SCG3	1.61943e-10	0.339582	1	0.743	2.84648e-06	0	SCG3
CPE	4.70718e-10	0.287725	1	0.922	8.27382e-06	0	CPE
GGH	6.78321e-10	0.294569	0.443	0.291	1.19229e-05	0	GGH
SMC2	6.94676e-10	0.258288	0.548	0.377	1.22103e-05	0	SMC2
AGT	1.31687e-09	0.355431	0.563	0.385	2.31467e-05	0	AGT
INA	2.44852e-09	0.267114	0.966	0.691	4.30376e-05	0	INA
SLC30A8	1.05745e-06	0.290475	0.991	0.795	0.0185868	0	SLC30A8
MAFA	7.55259e-175	1.63282	0.965	0.179	1.32752e-170	1	MAFA
LOC154761	3.02293e-151	1.16193	0.841	0.15	5.3134e-147	1	LOC154761
NPTX2	7.77055e-148	1.65009	0.988	0.351	1.36583e-143	1	NPTX2
ADCYAP1	5.01702e-146	1.35567	0.888	0.165	8.81841e-142	1	ADCYAP1
WSCD2	5.77524e-145	0.933901	0.643	0.062	1.01511e-140	1	WSCD2
GPM6A	2.30229e-144	0.918942	0.609	0.054	4.04673e-140	1	GPM6A
MAPT	2.44125e-128	1.16469	0.872	0.201	4.29098e-124	1	MAPT
INS	5.78613e-118	1.66853	1	0.539	1.01703e-113	1	INS
TGFBR3	1.5943e-115	1.20021	0.942	0.295	2.80229e-111	1	TGFBR3
FAM115C	1.01001e-114	0.837166	0.628	0.089	1.77529e-110	1	FAM115C
PDX1	6.27419e-114	1.27168	0.984	0.442	1.10281e-109	1	PDX1
PFKFB2	4.22727e-113	1.23977	0.965	0.437	7.43027e-109	1	PFKFB2
ENTPD3	4.53062e-113	1.11921	0.853	0.225	7.96348e-109	1	ENTPD3
CHL1	4.0079e-112	0.894449	0.632	0.091	7.04469e-108	1	CHL1
TFCP2L1	9.7744e-111	0.891238	0.705	0.12	1.71805e-106	1	TFCP2L1
CYYR1	4.73192e-108	0.781396	0.632	0.089	8.3173e-104	1	CYYR1
SYT13	7.09794e-107	1.13832	0.996	0.57	1.24761e-102	1	SYT13
LRRTM3	1.25252e-102	0.690515	0.461	0.044	2.20155e-98	1	LRRTM3
DLK1	5.98469e-102	1.43917	0.659	0.131	1.05193e-97	1	DLK1
VAT1L	4.03876e-98	0.864725	0.709	0.138	7.09893e-94	1	VAT1L
SCD5	8.16172e-98	1.09587	0.992	0.529	1.43459e-93	1	SCD5
MEG3	1.95447e-90	1.07791	0.961	0.401	3.43537e-86	1	MEG3
HADH	9.07856e-89	1.06556	1	0.624	1.59574e-84	1	HADH
FAM105A	7.97678e-88	0.978455	0.946	0.435	1.40208e-83	1	FAM105A
CASR	8.65705e-88	1.05975	0.953	0.347	1.52165e-83	1	CASR
SIX2	4.82351e-87	0.74688	0.593	0.108	8.47829e-83	1	SIX2
KLHDC8A	3.9102e-86	0.876734	0.663	0.146	6.87296e-82	1	KLHDC8A
IGSF11	5.6382e-86	0.515284	0.422	0.046	9.91027e-82	1	IGSF11
TRPM3	1.34059e-84	0.609845	0.523	0.077	2.35635e-80	1	TRPM3
ROBO1	2.14923e-84	0.823388	0.779	0.217	3.7777e-80	1	ROBO1
BPIFC	1.77089e-83	0.492032	0.337	0.025	3.1127e-79	1	BPIFC
ESR1	4.92192e-83	0.552061	0.457	0.057	8.65125e-79	1	ESR1
TMEM150C	8.39509e-82	0.678592	0.535	0.091	1.47561e-77	1	TMEM150C
SORL1	8.40661e-82	0.913766	0.996	0.64	1.47763e-77	1	SORL1
SUSD4	9.67965e-82	0.892573	0.907	0.362	1.70139e-77	1	SUSD4
BMP5	6.38756e-81	0.763045	0.574	0.107	1.12274e-76	1	BMP5
IAPP	8.57227e-79	1.18776	0.977	0.772	1.50675e-74	1	IAPP
FAM107A	1.06445e-78	0.840438	0.446	0.064	1.87099e-74	1	FAM107A
CAPN13	1.16151e-78	0.587537	0.43	0.055	2.04158e-74	1	CAPN13
TIMP2	3.0332e-78	0.877288	1	0.669	5.33146e-74	1	TIMP2
ELMO1	6.96118e-78	0.762503	0.651	0.147	1.22357e-73	1	ELMO1
ROBO2	5.40318e-77	0.86841	0.849	0.276	9.49716e-73	1	ROBO2
CYP2U1	8.83809e-77	0.822717	0.822	0.283	1.55347e-72	1	CYP2U1
RRAGD	3.19433e-73	0.733723	0.992	0.73	5.61467e-69	1	RRAGD
PCSK1	5.83105e-73	0.987976	1	0.515	1.02492e-68	1	PCSK1
DHRS2	6.04824e-73	0.894643	0.779	0.234	1.0631e-68	1	DHRS2
ATRNL1	6.32198e-72	0.800967	0.837	0.308	1.11121e-67	1	ATRNL1
EXPH5	1.15035e-71	0.911595	0.717	0.228	2.02197e-67	1	EXPH5
ITPR3	1.38104e-70	0.84125	0.938	0.462	2.42745e-66	1	ITPR3
SLC6A17	4.22054e-70	0.812444	0.795	0.256	7.41845e-66	1	SLC6A17
DGCR5	8.88668e-70	0.516452	0.419	0.06	1.56201e-65	1	DGCR5
GREM1	9.86549e-70	0.726284	0.609	0.137	1.73406e-65	1	GREM1
GLP1R	1.22187e-69	0.426184	0.372	0.044	2.14767e-65	1	GLP1R
PPP2R2C	1.84638e-69	0.656114	0.62	0.145	3.24539e-65	1	PPP2R2C
KIRREL3	2.52627e-69	0.415571	0.287	0.022	4.44043e-65	1	KIRREL3
FFAR4	1.04038e-68	0.859543	0.717	0.199	1.82868e-64	1	FFAR4
ATP2A3	2.57585e-68	0.828486	0.922	0.454	4.52757e-64	1	ATP2A3
TTC7B	4.13969e-68	0.748369	0.849	0.342	7.27633e-64	1	TTC7B
KIAA1211	2.70582e-67	0.613214	0.465	0.082	4.75603e-63	1	KIAA1211
KIAA2022	3.80208e-67	0.73019	0.682	0.185	6.68291e-63	1	KIAA2022
PIR	1.6058e-66	0.749068	0.81	0.296	2.82252e-62	1	PIR
RASGRF1	5.5567e-66	0.750227	0.748	0.234	9.76701e-62	1	RASGRF1
TMEM108	4.42748e-65	0.531341	0.426	0.069	7.78218e-61	1	TMEM108
CABP7	7.86016e-65	0.737494	0.721	0.191	1.38158e-60	1	CABP7
DHRS7	9.56007e-65	0.598021	0.996	0.793	1.68037e-60	1	DHRS7
RBFOX3	1.3269e-64	0.494351	0.395	0.055	2.33229e-60	1	RBFOX3
SLC2A2	1.46319e-64	0.483022	0.38	0.051	2.57185e-60	1	SLC2A2
UCHL1	3.36217e-64	0.817377	1	0.696	5.90969e-60	1	UCHL1
PPM1E	9.12543e-64	0.659154	0.581	0.136	1.60398e-59	1	PPM1E
SIPA1L2	1.32879e-63	0.773088	0.86	0.374	2.33562e-59	1	SIPA1L2
DOCK10	2.62324e-63	0.542603	0.519	0.105	4.61087e-59	1	DOCK10
PRUNE2	4.81792e-63	0.82588	0.888	0.436	8.46846e-59	1	PRUNE2
TAGLN3	6.93069e-63	0.793796	0.907	0.408	1.21821e-58	1	TAGLN3
RAB15	1.37579e-62	0.808884	0.899	0.475	2.41823e-58	1	RAB15
MNX1	9.07377e-62	0.820748	0.826	0.375	1.5949e-57	1	MNX1
SMAD9	1.24045e-61	0.742568	0.667	0.188	2.18034e-57	1	SMAD9
CHST8	5.18085e-61	0.431987	0.349	0.045	9.10639e-57	1	CHST8
FAM222A	7.07624e-61	0.731645	0.942	0.55	1.24379e-56	1	FAM222A
RGS16	7.26774e-61	0.609303	0.45	0.084	1.27745e-56	1	RGS16
PRSS23	1.31877e-60	0.802444	0.961	0.519	2.31801e-56	1	PRSS23
APCDD1L-AS1	3.90404e-60	0.428557	0.345	0.045	6.86213e-56	1	APCDD1L-AS1
PLCB4	3.91446e-60	0.756625	0.926	0.444	6.88045e-56	1	PLCB4
VWDE	5.02248e-60	0.734452	0.748	0.268	8.82802e-56	1	VWDE
CDH22	5.22897e-60	0.476759	0.349	0.047	9.19097e-56	1	CDH22
HS6ST1	1.67137e-59	0.739328	0.86	0.475	2.93776e-55	1	HS6ST1
TSHZ3	4.3159e-58	0.614652	0.616	0.169	7.58606e-54	1	TSHZ3
TCERG1L	4.51451e-58	0.449938	0.36	0.052	7.93516e-54	1	TCERG1L
CDKN1C	7.34001e-58	0.876332	0.942	0.551	1.29015e-53	1	CDKN1C
GEM	1.20664e-57	0.778667	0.62	0.179	2.12091e-53	1	GEM
HOPX1	4.19582e-57	0.730974	0.787	0.299	7.37499e-53	1	HOPX
TMEM37	4.5627e-57	0.740554	0.764	0.281	8.01986e-53	1	TMEM37
SLC18A2	1.08982e-56	0.693884	0.45	0.09	1.91558e-52	1	SLC18A2
ABCC8	1.70118e-56	0.735393	0.996	0.708	2.99017e-52	1	ABCC8
SCD	2.65509e-56	0.606472	0.996	0.854	4.66686e-52	1	SCD
PCDH7	5.66799e-56	0.815461	0.504	0.118	9.96263e-52	1	PCDH7
DACH2	1.33941e-55	0.404981	0.337	0.047	2.35429e-51	1	DACH2
PTPRU	1.8358e-55	0.505893	0.426	0.087	3.22679e-51	1	PTPRU
TMEM64	2.56376e-55	0.693883	0.806	0.4	4.50632e-51	1	TMEM64
GLIS3	9.76748e-55	0.739197	0.919	0.453	1.71683e-50	1	GLIS3
LINC00263	1.22821e-54	0.761129	0.872	0.412	2.15883e-50	1	LINC00263
ERO1LB	1.24151e-54	0.618497	0.996	0.82	2.18221e-50	1	ERO1LB
MT1X	2.56751e-54	0.571165	0.426	0.086	4.51291e-50	1	MT1X
FAM159B	2.98972e-54	0.847193	0.713	0.263	5.25503e-50	1	FAM159B
PKIB	4.58561e-54	0.696265	0.798	0.304	8.06013e-50	1	PKIB
EDARADD	6.88137e-54	0.711176	0.849	0.368	1.20954e-49	1	EDARADD
KIAA1644	1.54357e-53	0.580682	0.496	0.113	2.71313e-49	1	KIAA1644
EPHA1-AS1	3.11436e-53	0.470168	0.415	0.08	5.47412e-49	1	EPHA1-AS1
OLFM1	3.77441e-53	0.652279	0.667	0.232	6.63428e-49	1	OLFM1
PRPH	1.02048e-52	0.371739	0.271	0.03	1.79369e-48	1	PRPH
KCNG3	3.94892e-52	0.394819	0.36	0.058	6.94101e-48	1	KCNG3
TMED6	4.69503e-52	0.673811	0.678	0.231	8.25245e-48	1	TMED6
HHATL	6.82484e-52	0.378436	0.287	0.035	1.1996e-47	1	HHATL
STXBP1	7.07229e-52	0.519944	1	0.881	1.2431e-47	1	STXBP1
SPAG6	9.16187e-51	0.312278	0.252	0.026	1.61038e-46	1	SPAG6
RCBTB2	9.23636e-51	0.612854	0.686	0.252	1.62347e-46	1	RCBTB2
ASB9	1.97718e-50	0.457918	0.353	0.059	3.47529e-46	1	ASB9
LMO2	2.34259e-50	0.664191	0.725	0.278	4.11758e-46	1	LMO2
KIF5C	4.23654e-50	0.629241	0.981	0.639	7.44656e-46	1	KIF5C
GSN	5.21942e-50	0.681304	0.899	0.499	9.17417e-46	1	GSN
RGL1	5.60172e-50	0.639925	0.74	0.289	9.84615e-46	1	RGL1
PVRL3	6.28959e-50	0.679074	0.849	0.462	1.10552e-45	1	PVRL3
JPH1	9.96615e-50	0.532081	0.5	0.13	1.75175e-45	1	JPH1
CTSL2	2.32881e-49	0.436058	0.31	0.047	4.09335e-45	1	CTSL2
SIX3	3.41542e-49	0.555677	0.287	0.039	6.00328e-45	1	SIX3
ENO2	5.24641e-49	0.612155	0.973	0.701	9.22161e-45	1	ENO2
IFIT1	1.0812e-48	0.570972	0.597	0.182	1.90043e-44	1	IFIT1
SLC2A13	1.32083e-48	0.593346	0.946	0.645	2.32163e-44	1	SLC2A13
P2RY1	1.82156e-48	0.449798	0.372	0.07	3.20176e-44	1	P2RY1
NR0B1	3.37176e-48	0.678933	0.717	0.262	5.92655e-44	1	NR0B1
GNPDA1	5.00771e-48	0.572433	0.988	0.736	8.80205e-44	1	GNPDA1
SSTR5-AS1	5.04882e-48	0.468656	0.372	0.07	8.87431e-44	1	SSTR5-AS1
C14orf132	5.73445e-48	0.626767	0.961	0.615	1.00794e-43	1	C14orf132
ELAVL4	8.74019e-48	0.659075	0.903	0.423	1.53626e-43	1	ELAVL4
PLEKHA6	8.97308e-48	0.663904	0.884	0.517	1.5772e-43	1	PLEKHA6
CCDC109B	1.34565e-47	0.606735	0.802	0.365	2.36524e-43	1	CCDC109B
RIMKLA	1.55609e-47	0.591634	0.74	0.293	2.73515e-43	1	RIMKLA
ASAP1	2.69202e-47	0.597789	0.934	0.634	4.73176e-43	1	ASAP1
RBP4	2.70495e-47	0.86517	0.922	0.682	4.75448e-43	1	RBP4
SYBU	2.90145e-47	0.617958	0.767	0.332	5.09989e-43	1	SYBU
RAPH1	3.80483e-47	0.648319	0.864	0.512	6.68776e-43	1	RAPH1
MPP1	4.68316e-47	0.634635	0.806	0.392	8.23158e-43	1	MPP1
CPNE4	6.56489e-47	0.509004	0.395	0.084	1.15391e-42	1	CPNE4
TSPAN1	6.56648e-47	0.655166	0.527	0.156	1.15419e-42	1	TSPAN1
PLCXD3	3.32131e-46	0.661532	0.988	0.622	5.83787e-42	1	PLCXD3
SYT7	1.19213e-45	0.593448	0.996	0.695	2.0954e-41	1	SYT7
GRIN2A	1.721e-45	0.359816	0.252	0.031	3.025e-41	1	GRIN2A
SYNM	5.29147e-45	0.615783	0.5	0.141	9.30081e-41	1	SYNM
GCGR	5.62527e-45	0.317009	0.295	0.044	9.88754e-41	1	GCGR
SLC45A3	6.22117e-45	0.365927	0.333	0.06	1.0935e-40	1	SLC45A3
C1orf127	7.88526e-45	0.397551	0.372	0.072	1.38599e-40	1	C1orf127
PIPOX	4.81012e-44	0.556088	0.574	0.176	8.45475e-40	1	PIPOX
THBD	6.13222e-44	0.546638	0.376	0.08	1.07786e-39	1	THBD
SREBF1	1.25837e-43	0.561962	0.938	0.669	2.21183e-39	1	SREBF1
ANKRD6	1.3025e-43	0.481393	0.473	0.128	2.2894e-39	1	ANKRD6
DLG2	2.88306e-43	0.403324	0.38	0.08	5.06756e-39	1	DLG2
BHLHE41	4.86239e-43	0.618761	0.841	0.385	8.54662e-39	1	BHLHE41
PTPN3	1.29363e-42	0.588124	0.895	0.582	2.27381e-38	1	PTPN3
MAN1C1	1.96264e-42	0.637392	0.833	0.429	3.44973e-38	1	MAN1C1
CDK5R1	4.43255e-42	0.607055	0.709	0.294	7.79109e-38	1	CDK5R1
CPD	4.51278e-42	0.403206	0.996	0.884	7.93212e-38	1	CPD
FMN2	6.95275e-42	0.594587	0.872	0.424	1.22209e-37	1	FMN2
SLC4A10	1.00146e-41	0.573687	0.74	0.295	1.76026e-37	1	SLC4A10
MTUS2	1.79346e-40	0.56455	0.647	0.244	3.15236e-36	1	MTUS2
ADRA2A	2.35497e-40	0.432234	0.407	0.099	4.13933e-36	1	ADRA2A
IL20RA	3.81344e-40	0.44229	0.508	0.148	6.70288e-36	1	IL20RA
TUBB2B	4.53722e-40	0.532744	0.496	0.147	7.97508e-36	1	TUBB2B
MGAT4A	1.20534e-39	0.466485	0.95	0.793	2.11862e-35	1	MGAT4A
TPPP	7.8485e-39	0.459024	0.481	0.146	1.37953e-34	1	TPPP
IGSF1	8.58325e-39	0.456175	0.349	0.077	1.50868e-34	1	IGSF1
MIS18BP1	1.06293e-38	0.568542	0.647	0.276	1.86832e-34	1	MIS18BP1
TBC1D4	1.22559e-38	0.586919	0.88	0.503	2.15422e-34	1	TBC1D4
MEIS2	1.342e-38	0.527052	0.973	0.734	2.35882e-34	1	MEIS2
WNT4	1.43399e-38	0.621724	0.903	0.507	2.52053e-34	1	WNT4
TRIM2	1.46315e-38	0.481141	0.946	0.681	2.57177e-34	1	TRIM2
CNRIP1	1.84186e-38	0.516044	0.667	0.26	3.23743e-34	1	CNRIP1
KCNQ2	2.19441e-38	0.294161	0.298	0.054	3.85712e-34	1	KCNQ2
SRD5A1	2.43399e-38	0.617599	0.717	0.354	4.27822e-34	1	SRD5A1
SOCS2	7.6451e-38	0.49899	0.581	0.21	1.34378e-33	1	SOCS2
MCF2L2	9.47442e-38	0.434993	0.403	0.104	1.66532e-33	1	MCF2L2
SLC2A12	1.01992e-37	0.383553	0.314	0.064	1.79271e-33	1	SLC2A12
SALL2	1.12784e-37	0.523348	0.698	0.299	1.9824e-33	1	SALL2
GAD2	2.94186e-37	0.585936	0.992	0.671	5.17091e-33	1	GAD2
APCDD1L	3.70833e-37	0.371702	0.31	0.063	6.51814e-33	1	APCDD1L
TSPAN13	4.36882e-37	0.399164	0.996	0.888	7.67908e-33	1	TSPAN13
TMOD2	4.79828e-37	0.51818	0.876	0.509	8.43394e-33	1	TMOD2
IQSEC1	6.42287e-37	0.560149	0.88	0.586	1.12895e-32	1	IQSEC1
JAKMIP1	8.08287e-37	0.409727	0.438	0.12	1.42073e-32	1	JAKMIP1
DIP2C	8.31652e-37	0.542002	0.895	0.601	1.46179e-32	1	DIP2C
ALDOC	1.1564e-36	0.505927	0.671	0.272	2.03261e-32	1	ALDOC
CLCN4	2.77825e-36	0.549505	0.771	0.374	4.88334e-32	1	CLCN4
GRIA4	4.3412e-36	0.421215	0.333	0.073	7.63052e-32	1	GRIA4
ZNF365	4.62196e-36	0.429111	0.419	0.116	8.12401e-32	1	ZNF365
ME1	4.68048e-36	0.550963	0.686	0.301	8.22688e-32	1	ME1
ARHGEF3	6.70662e-36	0.600524	0.756	0.42	1.17882e-31	1	ARHGEF3
DNAJB9	6.86586e-36	0.505484	0.953	0.668	1.20681e-31	1	DNAJB9
SCGN	7.37308e-36	0.53406	1	0.836	1.29597e-31	1	SCGN
CADM1	2.13549e-35	0.496111	0.969	0.735	3.75356e-31	1	CADM1
LINC00673	2.36001e-35	0.532563	0.69	0.301	4.14819e-31	1	LINC00673
APBA1	3.85672e-35	0.395676	0.399	0.107	6.77895e-31	1	APBA1
KATNAL1	4.25235e-35	0.528645	0.767	0.373	7.47436e-31	1	KATNAL1
GLT25D2	5.07343e-35	0.366106	0.364	0.09	8.91757e-31	1	GLT25D2
G6PC2	6.88673e-35	0.654736	0.973	0.679	1.21048e-30	1	G6PC2
CACNA2D1	1.07031e-34	0.486967	0.612	0.229	1.88128e-30	1	CACNA2D1
SOBP	1.26091e-34	0.556172	0.802	0.428	2.2163e-30	1	SOBP
ARG2	1.40173e-34	0.600641	0.775	0.416	2.46381e-30	1	ARG2
SOGA3	1.63096e-34	0.37419	0.388	0.102	2.86673e-30	1	SOGA3
MARK1	1.73212e-34	0.563247	0.829	0.452	3.04454e-30	1	MARK1
SRXN1	2.4364e-34	0.567892	0.926	0.673	4.28246e-30	1	SRXN1
BTBD3	2.59104e-34	0.516671	0.915	0.66	4.55428e-30	1	BTBD3
WDR17	3.29556e-34	0.521192	0.694	0.301	5.79261e-30	1	WDR17
KCNJ11	6.86544e-34	0.556668	0.76	0.382	1.20674e-29	1	KCNJ11
TRIM9	7.75929e-34	0.420598	0.461	0.143	1.36385e-29	1	TRIM9
LINC00622	8.65596e-34	0.390092	0.399	0.109	1.52146e-29	1	LINC00622
CAMKK1	9.6872e-34	0.392019	0.403	0.112	1.70272e-29	1	CAMKK1
TSPAN5	1.33934e-33	0.47682	0.496	0.171	2.35416e-29	1	TSPAN5
TIAM1	1.58304e-33	0.510479	0.744	0.336	2.7825e-29	1	TIAM1
ANKRD65	1.70433e-33	0.527368	0.884	0.547	2.9957e-29	1	ANKRD65
AACS	1.8529e-33	0.498018	0.868	0.64	3.25684e-29	1	AACS
SH3GL21	3.06074e-33	0.52858	0.938	0.544	5.37986e-29	1	SH3GL2
CDON	3.52878e-33	0.449158	0.55	0.2	6.20254e-29	1	CDON
UBE2QL1	3.66928e-33	0.545111	0.833	0.431	6.4495e-29	1	UBE2QL1
1931-09-01	6.08124e-33	0.540426	0.837	0.431	1.0689e-28	1	2021-09-03
MAP1A	7.03971e-33	0.545698	0.818	0.423	1.23737e-28	1	MAP1A
GTF3C1	7.55716e-33	0.508555	0.814	0.494	1.32832e-28	1	GTF3C1
ACVR1B	8.37564e-33	0.534762	0.779	0.411	1.47219e-28	1	ACVR1B
PPL	1.28612e-32	0.453268	0.953	0.716	2.26062e-28	1	PPL
SYNE2	1.43472e-32	0.537823	0.981	0.654	2.5218e-28	1	SYNE2
FBXO7	3.1976e-32	0.366563	0.973	0.825	5.62042e-28	1	FBXO7
PDE8B1	8.28146e-32	0.546594	0.81	0.425	1.45563e-27	1	PDE8B
BTG3	1.25623e-31	0.411124	0.988	0.825	2.20808e-27	1	BTG3
ALOX5	1.83341e-31	0.454513	0.558	0.212	3.22259e-27	1	ALOX5
PCP41	2.08837e-31	0.51003	0.888	0.471	3.67072e-27	1	PCP4
PRKAR2B	2.38418e-31	0.431737	0.492	0.17	4.19067e-27	1	PRKAR2B
DOCK3	2.3982e-31	0.398646	0.453	0.141	4.21531e-27	1	DOCK3
ARL4D	2.57829e-31	0.525476	0.492	0.186	4.53186e-27	1	ARL4D
SLIT1	3.06873e-31	0.370752	0.341	0.087	5.39391e-27	1	SLIT1
RNF130	4.53575e-31	0.38562	0.95	0.768	7.97249e-27	1	RNF130
ATP8A1	6.20602e-31	0.504985	0.922	0.581	1.09083e-26	1	ATP8A1
AKT3	6.26016e-31	0.458913	0.946	0.64	1.10035e-26	1	AKT3
TSHZ1	6.50209e-31	0.478241	0.884	0.634	1.14287e-26	1	TSHZ1
NEFM	7.48937e-31	0.450647	0.357	0.097	1.31641e-26	1	NEFM
TNS1	8.39131e-31	0.51269	0.771	0.362	1.47494e-26	1	TNS1
GREB1	8.60169e-31	0.415407	0.388	0.118	1.51192e-26	1	GREB1
CABLES1	1.0802e-30	0.392777	0.384	0.115	1.89867e-26	1	CABLES1
LOC643837	1.5135e-30	0.48808	0.756	0.389	2.66028e-26	1	LOC643837
ZNF697	1.59548e-30	0.490018	0.659	0.3	2.80437e-26	1	ZNF697
ALCAM	1.61863e-30	0.370931	0.996	0.891	2.84507e-26	1	ALCAM
GLT8D2	2.57908e-30	0.45266	0.469	0.158	4.53324e-26	1	GLT8D2
MYH14	3.11194e-30	0.477447	0.907	0.666	5.46986e-26	1	MYH14
VOPP1	3.22358e-30	0.375404	0.988	0.855	5.66608e-26	1	VOPP1
ADAMTS2	4.30242e-30	0.437962	0.698	0.305	7.56237e-26	1	ADAMTS2
TMCC3	5.33012e-30	0.482146	0.814	0.422	9.36875e-26	1	TMCC3
PEX5L	5.93417e-30	0.365427	0.26	0.056	1.04305e-25	1	PEX5L
WLS	6.89734e-30	0.509249	0.903	0.513	1.21235e-25	1	WLS
RNF6	8.30378e-30	0.475531	0.841	0.577	1.45955e-25	1	RNF6
OSBPL8	8.41934e-30	0.438741	0.915	0.692	1.47987e-25	1	OSBPL8
TMEM132B	1.23655e-29	0.39983	0.395	0.119	2.17348e-25	1	TMEM132B
CCNI	1.26633e-29	0.270901	1	0.987	2.22583e-25	1	CCNI
HDAC9	1.56238e-29	0.362313	0.473	0.158	2.7462e-25	1	HDAC9
PLCL2	1.68942e-29	0.470624	0.694	0.325	2.96949e-25	1	PLCL2
SURF4	1.79274e-29	0.31306	1	0.964	3.15111e-25	1	SURF4
KCNK161	2.06813e-29	0.51215	0.802	0.399	3.63516e-25	1	KCNK16
TMOD1	2.22698e-29	0.538064	0.868	0.528	3.91437e-25	1	TMOD1
INSM1	2.23474e-29	0.526184	1	0.712	3.928e-25	1	INSM1
TOMM20	6.03062e-29	0.376739	0.981	0.867	1.06e-24	1	TOMM20
NCR3LG1	8.09454e-29	0.387352	0.477	0.17	1.42278e-24	1	NCR3LG1
DNAH5	1.21171e-28	0.498855	0.512	0.2	2.12983e-24	1	DNAH5
MYO1D	1.29669e-28	0.297958	0.988	0.93	2.2792e-24	1	MYO1D
HOOK1	1.5348e-28	0.365625	0.977	0.859	2.69771e-24	1	HOOK1
CACNA1D	1.86434e-28	0.484686	0.787	0.425	3.27695e-24	1	CACNA1D
DNM3	2.49966e-28	0.338129	0.318	0.084	4.39365e-24	1	DNM3
SNAP91	2.56588e-28	0.497415	0.787	0.405	4.51004e-24	1	SNAP91
CHN1	2.57632e-28	0.451406	0.659	0.299	4.5284e-24	1	CHN1
C21orf91	2.6818e-28	0.449578	0.612	0.274	4.7138e-24	1	C21orf91
APPL2	2.82391e-28	0.426505	0.938	0.699	4.96359e-24	1	APPL2
PKP2	3.9788e-28	0.481895	0.74	0.406	6.99354e-24	1	PKP2
SEMA6D	4.38972e-28	0.488259	0.636	0.297	7.71581e-24	1	SEMA6D
ZDHHC11	4.43157e-28	0.250752	0.275	0.063	7.78937e-24	1	ZDHHC11
VEGFA	5.05718e-28	0.322286	1	0.942	8.889e-24	1	VEGFA
ABCG1	5.09149e-28	0.420988	0.589	0.247	8.94931e-24	1	ABCG1
SYT14	5.50838e-28	0.433901	0.612	0.256	9.68207e-24	1	SYT14
GNG41	1.17308e-27	0.510919	0.957	0.595	2.06192e-23	1	GNG4
NR3C1	1.2677e-27	0.378042	0.965	0.801	2.22824e-23	1	NR3C1
CBFA2T3	1.64234e-27	0.362596	0.395	0.127	2.88675e-23	1	CBFA2T3
ISOC1	1.7408e-27	0.454244	0.744	0.409	3.05981e-23	1	ISOC1
MAPRE2	2.3201e-27	0.403151	0.919	0.702	4.07804e-23	1	MAPRE2
SLC16A9	2.47113e-27	0.473991	0.713	0.341	4.34351e-23	1	SLC16A9
TSPYL5	3.05463e-27	0.452042	0.864	0.611	5.36912e-23	1	TSPYL5
SLC17A6	3.25199e-27	0.316513	0.283	0.067	5.71602e-23	1	SLC17A6
PDZD2	4.63517e-27	0.501575	0.694	0.332	8.14724e-23	1	PDZD2
NSG11	5.85016e-27	0.454575	0.585	0.248	1.02828e-22	1	NSG1
RASD1	9.28208e-27	0.487493	0.946	0.693	1.63151e-22	1	RASD1
C6orf48	9.28767e-27	0.349439	1	0.905	1.63249e-22	1	C6orf48
JHDM1D	9.30393e-27	0.46302	0.767	0.445	1.63535e-22	1	JHDM1D
GLCCI1	1.2813e-26	0.467381	0.578	0.262	2.25215e-22	1	GLCCI1
MYO3A	1.3005e-26	0.471506	0.771	0.401	2.28588e-22	1	MYO3A
TNFRSF11A	1.38902e-26	0.387775	0.43	0.152	2.44148e-22	1	TNFRSF11A
ST3GAL5	2.06388e-26	0.511073	0.717	0.4	3.62769e-22	1	ST3GAL5
KIAA1107	2.70984e-26	0.397048	0.539	0.222	4.76309e-22	1	KIAA1107
DCX	5.04727e-26	0.307853	0.295	0.075	8.87159e-22	1	DCX
KCTD8	9.18075e-26	0.302257	0.376	0.113	1.6137e-21	1	KCTD8
HLF	1.88284e-25	0.46221	0.678	0.339	3.30947e-21	1	HLF
MTERFD2	2.17008e-25	0.443101	0.674	0.359	3.81435e-21	1	MTERFD2
PARVB	2.19232e-25	0.443823	0.876	0.535	3.85344e-21	1	PARVB
PRKCH	2.9164e-25	0.42654	0.531	0.233	5.12616e-21	1	PRKCH
KIF13A	2.98264e-25	0.399184	0.934	0.714	5.24259e-21	1	KIF13A
UBE3C	3.59826e-25	0.394363	0.922	0.723	6.32466e-21	1	UBE3C
LOC100134229	3.81634e-25	0.374229	0.481	0.186	6.70797e-21	1	LOC100134229
KGFLP2	4.04388e-25	0.389469	0.562	0.235	7.10792e-21	1	KGFLP2
LDLRAD4	4.25277e-25	0.393958	0.473	0.181	7.47509e-21	1	LDLRAD4
PRMT2	4.29553e-25	0.360185	0.942	0.778	7.55025e-21	1	PRMT2
KIF1A	4.83281e-25	0.389468	0.992	0.785	8.49462e-21	1	KIF1A
NANOS1	5.27341e-25	0.485354	0.725	0.399	9.26907e-21	1	NANOS1
TPM3	5.32506e-25	0.261738	0.992	0.959	9.35986e-21	1	TPM3
MLXIPL	1.37131e-24	0.432307	0.938	0.664	2.41035e-20	1	MLXIPL
PALM2	1.52463e-24	0.356759	0.422	0.152	2.67983e-20	1	PALM2
VPS37A	1.53639e-24	0.405021	0.907	0.71	2.70051e-20	1	VPS37A
NMNAT21	2.41889e-24	0.449177	0.829	0.484	4.25168e-20	1	NMNAT2
NEO1	2.63272e-24	0.419486	0.814	0.549	4.62753e-20	1	NEO1
ENDOD1	2.92234e-24	0.426395	0.678	0.36	5.1366e-20	1	ENDOD1
SEPW1	3.29391e-24	0.324793	0.992	0.847	5.7897e-20	1	SEPW1
PEPD	3.61971e-24	0.36166	0.946	0.777	6.36236e-20	1	PEPD
FBXL2	3.68184e-24	0.355179	0.527	0.217	6.47157e-20	1	FBXL2
WASF3	3.93528e-24	0.424163	0.678	0.355	6.91704e-20	1	WASF3
ANO5	4.25101e-24	0.393379	0.643	0.313	7.47199e-20	1	ANO5
CYP27A1	4.33449e-24	0.311025	0.434	0.157	7.61873e-20	1	CYP27A1
SNX29	4.59983e-24	0.417848	0.705	0.383	8.08511e-20	1	SNX29
CBX7	5.50387e-24	0.416127	0.872	0.565	9.67414e-20	1	CBX7
HSF4	5.64672e-24	0.385463	0.554	0.241	9.92524e-20	1	HSF4
NGRN	6.58691e-24	0.307656	0.969	0.849	1.15778e-19	1	NGRN
BNIP3L	7.49025e-24	0.302675	0.988	0.874	1.31656e-19	1	BNIP3L
LYSMD2	7.5331e-24	0.402136	0.922	0.687	1.32409e-19	1	LYSMD2
RASSF6	9.51902e-24	0.463563	0.752	0.401	1.67316e-19	1	RASSF6
CFL2	9.70474e-24	0.40525	0.888	0.619	1.7058e-19	1	CFL2
ATP1B2	1.19391e-23	0.409374	0.411	0.149	2.09853e-19	1	ATP1B2
SPEG	1.19484e-23	0.373925	0.531	0.217	2.10016e-19	1	SPEG
SURF2	1.47516e-23	0.437383	0.74	0.445	2.59288e-19	1	SURF2
HSPA1B	3.86205e-23	0.43604	0.829	0.571	6.78833e-19	1	HSPA1B
MCC	4.05e-23	0.410859	0.702	0.357	7.11869e-19	1	MCC
ROR1	4.08979e-23	0.447423	0.787	0.502	7.18863e-19	1	ROR1
MCTP2	4.41081e-23	0.406322	0.643	0.319	7.75288e-19	1	MCTP2
RPH3AL	4.69577e-23	0.433112	0.833	0.528	8.25375e-19	1	RPH3AL
STX1A	6.05913e-23	0.421008	0.93	0.633	1.06501e-18	1	STX1A
RUNX1T1	6.37042e-23	0.404816	0.756	0.36	1.11973e-18	1	RUNX1T1
GPSM1	7.46095e-23	0.4466	0.481	0.214	1.31141e-18	1	GPSM1
GLIS2	8.42852e-23	0.428862	0.837	0.563	1.48148e-18	1	GLIS2
SVIP	1.26569e-22	0.363302	0.919	0.696	2.22471e-18	1	SVIP
SPRYD3	1.86989e-22	0.344575	0.953	0.761	3.28671e-18	1	SPRYD3
MT1F	2.00621e-22	0.470056	0.535	0.255	3.52632e-18	1	MT1F
CPEB1	2.20561e-22	0.279827	0.372	0.125	3.87681e-18	1	CPEB1
TPRG1L	2.24759e-22	0.371614	0.888	0.702	3.9506e-18	1	TPRG1L
GPR158	2.34076e-22	0.350918	0.457	0.176	4.11435e-18	1	GPR158
PRKACB	2.5684e-22	0.373621	0.919	0.676	4.51448e-18	1	PRKACB
MXRA7	3.24942e-22	0.262772	0.996	0.952	5.7115e-18	1	MXRA7
ATP6V1B2	3.55268e-22	0.264915	0.996	0.932	6.24454e-18	1	ATP6V1B2
LOC100859930	3.83065e-22	0.389481	0.752	0.445	6.73314e-18	1	LOC100859930
ZNF540	3.93232e-22	0.336088	0.484	0.193	6.91184e-18	1	ZNF540
FGF9	4.54515e-22	0.340766	0.38	0.134	7.98901e-18	1	FGF9
HCN4	5.92055e-22	0.331527	0.384	0.139	1.04065e-17	1	HCN4
CAMLG	6.26059e-22	0.353834	0.926	0.728	1.10042e-17	1	CAMLG
RAB12	6.27968e-22	0.403366	0.678	0.378	1.10378e-17	1	RAB12
MAP6	7.85818e-22	0.41356	0.849	0.534	1.38123e-17	1	MAP6
TOMM34	1.126e-21	0.355966	0.895	0.715	1.97916e-17	1	TOMM34
CNKSR2	1.18171e-21	0.318277	0.267	0.077	2.07709e-17	1	CNKSR2
SCN1B	1.51331e-21	0.394489	0.426	0.169	2.65994e-17	1	SCN1B
RASGRP1	1.56982e-21	0.410451	0.527	0.24	2.75926e-17	1	RASGRP1
TBC1D24	1.87866e-21	0.410211	0.663	0.366	3.30212e-17	1	TBC1D24
CCDC88C	2.01126e-21	0.302489	0.326	0.109	3.53518e-17	1	CCDC88C
MT2A	2.56097e-21	0.535661	0.624	0.336	4.50142e-17	1	MT2A
PDE4DIP	3.86731e-21	0.387685	0.911	0.649	6.79758e-17	1	PDE4DIP
CDC37L1	5.72826e-21	0.402533	0.767	0.469	1.00686e-16	1	CDC37L1
TMEM55A	6.08026e-21	0.396072	0.733	0.429	1.06873e-16	1	TMEM55A
EPB41L31	6.62952e-21	0.399877	0.926	0.607	1.16527e-16	1	EPB41L3
GNG7	6.87317e-21	0.39321	0.694	0.382	1.2081e-16	1	GNG7
CD14	1.17437e-20	0.263138	0.298	0.093	2.06418e-16	1	CD14
FAM115A	1.2802e-20	0.30035	0.961	0.88	2.2502e-16	1	FAM115A
MYT1L	1.47258e-20	0.320238	0.368	0.132	2.58836e-16	1	MYT1L
MAPRE1	1.96057e-20	0.259431	0.996	0.928	3.44609e-16	1	MAPRE1
CDIP1	2.14336e-20	0.347622	0.872	0.644	3.76739e-16	1	CDIP1
AMPH	2.43882e-20	0.33351	0.434	0.174	4.28671e-16	1	AMPH
TXNDC16	2.48931e-20	0.343737	0.446	0.186	4.37546e-16	1	TXNDC16
PIM3	2.6672e-20	0.385736	0.853	0.571	4.68814e-16	1	PIM3
PHF1	3.58747e-20	0.387047	0.814	0.539	6.30569e-16	1	PHF1
KIAA0247	3.97846e-20	0.393416	0.857	0.602	6.99294e-16	1	KIAA0247
MAP1B	4.20152e-20	0.321198	1	0.87	7.38501e-16	1	MAP1B
SLC6A9	4.51387e-20	0.280348	0.31	0.104	7.93403e-16	1	SLC6A9
SESN1	5.37934e-20	0.37041	0.837	0.535	9.45527e-16	1	SESN1
EML6	5.66144e-20	0.386225	0.593	0.291	9.95112e-16	1	EML6
NFE2L1	6.40862e-20	0.281897	0.93	0.81	1.12644e-15	1	NFE2L1
CDCP1	6.76881e-20	0.40192	0.81	0.581	1.18975e-15	1	CDCP1
EFNA5	6.80114e-20	0.403696	0.674	0.356	1.19544e-15	1	EFNA5
C8orf47	6.85445e-20	0.373744	0.527	0.254	1.20481e-15	1	C8orf47
PSD3	6.96593e-20	0.415145	0.779	0.51	1.2244e-15	1	PSD3
HABP4	7.59402e-20	0.374993	0.841	0.619	1.3348e-15	1	HABP4
ACTR3B	8.19286e-20	0.348657	0.45	0.201	1.44006e-15	1	ACTR3B
DPP61	9.07906e-20	0.427791	0.961	0.62	1.59583e-15	1	DPP6
RNF157	9.86002e-20	0.373183	0.717	0.41	1.7331e-15	1	RNF157
KCNH2	1.05778e-19	0.378898	0.88	0.533	1.85927e-15	1	KCNH2
GPRIN3	1.11031e-19	0.338352	0.446	0.189	1.9516e-15	1	GPRIN3
IL17RB	1.44505e-19	0.361296	0.388	0.154	2.53997e-15	1	IL17RB
C1orf51	1.532e-19	0.301401	0.306	0.103	2.69279e-15	1	C1orf51
DUSP7	1.89604e-19	0.307211	0.403	0.163	3.33266e-15	1	DUSP7
SLC2A1	2.15798e-19	0.404577	0.554	0.276	3.79307e-15	1	SLC2A1
FGF5	2.19037e-19	0.316521	0.403	0.164	3.85001e-15	1	FGF5
SEMA5A1	2.25651e-19	0.421507	0.775	0.502	3.96627e-15	1	SEMA5A
PTPN4	2.76817e-19	0.397429	0.69	0.4	4.86562e-15	1	PTPN4
FAT1	2.9419e-19	0.423065	0.779	0.433	5.17098e-15	1	FAT1
CELF2	3.39304e-19	0.353471	0.492	0.223	5.96395e-15	1	CELF2
PRKCA	3.51491e-19	0.365214	0.616	0.323	6.17816e-15	1	PRKCA
PDE3A	3.85161e-19	0.334591	0.539	0.238	6.76998e-15	1	PDE3A
MBNL3	3.86439e-19	0.345308	0.481	0.221	6.79244e-15	1	MBNL3
ENPP5	4.26772e-19	0.381125	0.822	0.549	7.50137e-15	1	ENPP5
RHOQ	4.51632e-19	0.353826	0.938	0.731	7.93834e-15	1	RHOQ
FAM155A	4.74688e-19	0.34965	0.523	0.238	8.3436e-15	1	FAM155A
SQSTM1	5.19152e-19	0.254223	0.996	0.968	9.12513e-15	1	SQSTM1
ATL1	5.44973e-19	0.339737	0.481	0.218	9.57898e-15	1	ATL1
KLHL2	5.77532e-19	0.37795	0.756	0.491	1.01513e-14	1	KLHL2
HMGCLL1	5.97945e-19	0.36478	0.752	0.403	1.05101e-14	1	HMGCLL1
KAT2B	6.83743e-19	0.385924	0.736	0.457	1.20181e-14	1	KAT2B
ZMIZ1	7.54302e-19	0.323762	0.926	0.765	1.32584e-14	1	ZMIZ1
BBS2	8.97991e-19	0.367437	0.674	0.389	1.5784e-14	1	BBS2
NTPCR	9.70138e-19	0.351336	0.643	0.372	1.70521e-14	1	NTPCR
BCL9	9.95327e-19	0.347157	0.826	0.532	1.74949e-14	1	BCL9
RDH10	1.02116e-18	0.354053	0.581	0.29	1.7949e-14	1	RDH10
NAP1L3	1.31476e-18	0.357028	0.659	0.344	2.31096e-14	1	NAP1L3
JAZF1	1.43539e-18	0.376931	0.833	0.552	2.52299e-14	1	JAZF1
DYNC1I11	1.47379e-18	0.349647	0.601	0.296	2.59049e-14	1	DYNC1I1
PER3	1.72031e-18	0.412272	0.64	0.36	3.02379e-14	1	PER3
SNHG7	1.82916e-18	0.358716	0.934	0.781	3.21512e-14	1	SNHG7
CACNA1H	1.855e-18	0.37926	0.744	0.434	3.26054e-14	1	CACNA1H
RAP1GAP2	1.88907e-18	0.311522	0.996	0.9	3.32043e-14	1	RAP1GAP2
TMEM200A1	2.33606e-18	0.384346	0.651	0.354	4.10609e-14	1	TMEM200A
ABRACL	2.99328e-18	0.384427	0.744	0.439	5.26128e-14	1	ABRACL
KLHL29	3.15761e-18	0.294323	0.36	0.141	5.55013e-14	1	KLHL29
PLXNC1	3.29878e-18	0.345007	0.558	0.267	5.79826e-14	1	PLXNC1
CMTM8	3.3348e-18	0.325091	0.93	0.684	5.86157e-14	1	CMTM8
PFN2	3.56733e-18	0.276093	1	0.953	6.27029e-14	1	PFN2
OSTM1	3.71159e-18	0.349674	0.818	0.566	6.52387e-14	1	OSTM1
VLDLR	4.06367e-18	0.374515	0.775	0.518	7.14272e-14	1	VLDLR
CADPS	4.07576e-18	0.386904	0.981	0.683	7.16396e-14	1	CADPS
LONRF2	4.15466e-18	0.351926	0.899	0.607	7.30265e-14	1	LONRF2
C12orf76	4.41231e-18	0.360945	0.686	0.385	7.75552e-14	1	C12orf76
PELI1	5.08191e-18	0.376961	0.57	0.298	8.93248e-14	1	PELI1
BAG3	5.27385e-18	0.392891	0.729	0.466	9.26984e-14	1	BAG3
CD200	5.32061e-18	0.370146	0.981	0.67	9.35204e-14	1	CD200
NEU1	5.43061e-18	0.309015	0.961	0.791	9.54539e-14	1	NEU1
COPRS	5.69988e-18	0.293489	0.93	0.798	1.00187e-13	1	COPRS
TNKS2	5.96503e-18	0.318593	0.895	0.695	1.04847e-13	1	TNKS2
PHACTR2	6.5479e-18	0.348944	0.864	0.66	1.15092e-13	1	PHACTR2
PTCH1	7.13888e-18	0.336671	0.488	0.234	1.2548e-13	1	PTCH1
NAP1L51	8.48351e-18	0.364813	0.806	0.505	1.49115e-13	1	NAP1L5
PAPSS2	9.10447e-18	0.288148	1	0.909	1.60029e-13	1	PAPSS2
INSIG1	9.54048e-18	0.369008	0.88	0.642	1.67693e-13	1	INSIG1
LPIN1	9.54992e-18	0.319341	0.919	0.774	1.67859e-13	1	LPIN1
WDR7	1.11569e-17	0.370419	0.748	0.495	1.96105e-13	1	WDR7
ZHX3	1.23954e-17	0.321938	0.884	0.669	2.17875e-13	1	ZHX3
APBB3	1.42302e-17	0.331486	0.643	0.351	2.50125e-13	1	APBB3
LINC006171	1.50831e-17	0.386922	0.736	0.419	2.65116e-13	1	LINC00617
PCLO	1.77985e-17	0.325699	0.992	0.805	3.12845e-13	1	PCLO
MRAP2	1.7812e-17	0.333774	0.612	0.309	3.13082e-13	1	MRAP2
TRIQK	1.86574e-17	0.335155	0.864	0.656	3.27941e-13	1	TRIQK
ABHD3	1.97888e-17	0.380905	0.752	0.483	3.47828e-13	1	ABHD3
DPYSL2	2.59967e-17	0.329389	0.965	0.782	4.56944e-13	1	DPYSL2
SBDS	2.60689e-17	0.264872	0.953	0.843	4.58213e-13	1	SBDS
NAP1L2	2.8192e-17	0.351725	0.713	0.401	4.95531e-13	1	NAP1L2
RNF187	3.03466e-17	0.355804	0.895	0.733	5.33401e-13	1	RNF187
UBQLN2	3.10321e-17	0.285952	0.891	0.759	5.45451e-13	1	UBQLN2
EPB41L1	3.2193e-17	0.361404	0.802	0.54	5.65857e-13	1	EPB41L1
ING2	3.63079e-17	0.366128	0.748	0.493	6.38184e-13	1	ING2
APC	3.65916e-17	0.299806	0.899	0.754	6.4317e-13	1	APC
RAB39B	3.85854e-17	0.346978	0.667	0.371	6.78216e-13	1	RAB39B
UHMK1	4.23938e-17	0.278903	0.938	0.827	7.45156e-13	1	UHMK1
PIGA	4.25472e-17	0.318625	0.453	0.211	7.47852e-13	1	PIGA
AKAP11	4.33986e-17	0.283286	0.95	0.808	7.62818e-13	1	AKAP11
VEGFB	4.45972e-17	0.330125	0.814	0.574	7.83885e-13	1	VEGFB
RBBP8	4.58162e-17	0.363841	0.651	0.387	8.05312e-13	1	RBBP8
SLC6A6	4.65396e-17	0.352911	0.453	0.211	8.18026e-13	1	SLC6A6
KCTD6	6.08344e-17	0.322634	0.45	0.211	1.06929e-12	1	KCTD6
NEGR1	6.25615e-17	0.285006	0.422	0.179	1.09964e-12	1	NEGR1
CLGN	7.1246e-17	0.356415	0.698	0.411	1.25229e-12	1	CLGN
PIK3C2A	7.18183e-17	0.281652	0.957	0.823	1.26235e-12	1	PIK3C2A
MBP	7.2197e-17	0.325879	0.911	0.719	1.26901e-12	1	MBP
GTDC1	8.17916e-17	0.282959	0.391	0.169	1.43765e-12	1	GTDC1
STXBP5	9.17963e-17	0.336762	0.884	0.698	1.6135e-12	1	STXBP5
RNF13	1.08453e-16	0.307695	0.911	0.719	1.90628e-12	1	RNF13
ABAT	1.16501e-16	0.395446	0.686	0.434	2.04774e-12	1	ABAT
ARHGAP44	1.24603e-16	0.36278	0.624	0.36	2.19015e-12	1	ARHGAP44
SPIRE1	1.38225e-16	0.336335	0.864	0.674	2.42957e-12	1	SPIRE1
LMO1	1.53755e-16	0.29068	0.484	0.222	2.70255e-12	1	LMO1
PI4KA	1.55445e-16	0.306591	0.876	0.709	2.73225e-12	1	PI4KA
FAM171B	1.55931e-16	0.279621	0.403	0.171	2.7408e-12	1	FAM171B
SPTB	1.73396e-16	0.270429	0.419	0.176	3.04778e-12	1	SPTB
GPX2	1.97022e-16	0.373076	0.69	0.377	3.46305e-12	1	GPX2
TRIM37	2.0565e-16	0.345636	0.713	0.46	3.61471e-12	1	TRIM37
SC5DL	2.32808e-16	0.256484	0.965	0.853	4.09207e-12	1	SC5DL
LDOC1	2.81989e-16	0.303861	0.926	0.748	4.95653e-12	1	LDOC1
NEBL	2.84662e-16	0.339656	0.891	0.666	5.00351e-12	1	NEBL
EPB41L4A-AS1	2.86091e-16	0.337729	0.857	0.623	5.02861e-12	1	EPB41L4A-AS1
TMEM38B	2.91676e-16	0.338176	0.709	0.453	5.12679e-12	1	TMEM38B
KIAA1715	3.2872e-16	0.337346	0.756	0.51	5.77791e-12	1	KIAA1715
VAV3	3.44182e-16	0.266377	0.461	0.207	6.04968e-12	1	VAV3
CCSER2	3.59965e-16	0.304431	0.899	0.735	6.3271e-12	1	CCSER2
CYS1	4.2105e-16	0.256156	0.326	0.126	7.4008e-12	1	CYS1
KCNB2	4.22684e-16	0.310098	0.609	0.307	7.42951e-12	1	KCNB2
PTEN	4.39199e-16	0.256538	0.961	0.835	7.7198e-12	1	PTEN
FOCAD	5.08413e-16	0.343638	0.733	0.502	8.93638e-12	1	FOCAD
GDA1	5.99015e-16	0.364179	0.833	0.525	1.05289e-11	1	GDA
IGF1R	6.22457e-16	0.294871	0.888	0.744	1.09409e-11	1	IGF1R
GRB10	7.14439e-16	0.330246	0.795	0.501	1.25577e-11	1	GRB10
CCDC110	7.28512e-16	0.275032	0.388	0.169	1.28051e-11	1	CCDC110
GSE1	7.68229e-16	0.280856	0.977	0.848	1.35032e-11	1	GSE1
ZBTB4	7.95261e-16	0.283489	0.946	0.783	1.39783e-11	1	ZBTB4
ACLY	1.01562e-15	0.25524	0.981	0.93	1.78515e-11	1	ACLY
MAP2	1.26747e-15	0.286741	0.969	0.814	2.22782e-11	1	MAP2
NFASC1	1.5058e-15	0.32777	0.74	0.433	2.64675e-11	1	NFASC
ID1	1.61879e-15	0.497381	0.713	0.484	2.84534e-11	1	ID1
NBEA	1.63868e-15	0.292478	0.969	0.821	2.88032e-11	1	NBEA
ST181	1.68936e-15	0.353118	0.857	0.507	2.96939e-11	1	ST18
ADSSL1	1.80503e-15	0.277938	0.411	0.185	3.17269e-11	1	ADSSL1
UNC80	1.91568e-15	0.361569	0.872	0.547	3.36718e-11	1	UNC80
ZNF853	2.04071e-15	0.311899	0.647	0.368	3.58696e-11	1	ZNF853
ANP32E	2.09835e-15	0.321215	0.829	0.613	3.68827e-11	1	ANP32E
SLC39A14	2.1231e-15	0.280185	0.961	0.783	3.73177e-11	1	SLC39A14
MTERFD3	2.19059e-15	0.324674	0.659	0.387	3.8504e-11	1	MTERFD3
DGKD	2.39674e-15	0.318243	0.543	0.299	4.21275e-11	1	DGKD
C22orf28	2.64364e-15	0.271813	0.903	0.751	4.64672e-11	1	C22orf28
PIK3R3	2.72916e-15	0.320332	0.484	0.247	4.79704e-11	1	PIK3R3
NPR2	3.36279e-15	0.315801	0.438	0.213	5.91078e-11	1	NPR2
AFF1	5.12487e-15	0.282827	0.915	0.757	9.00799e-11	1	AFF1
ADH5	6.28329e-15	0.281163	0.953	0.8	1.10441e-10	1	ADH5
CALD1	6.8599e-15	0.324046	0.713	0.414	1.20576e-10	1	CALD1
SLC46A1	6.89313e-15	0.276147	0.465	0.226	1.21161e-10	1	SLC46A1
PPM1H	6.92785e-15	0.343089	0.605	0.369	1.21771e-10	1	PPM1H
ANKH	8.0081e-15	0.297374	0.981	0.761	1.40758e-10	1	ANKH
ZNF204P	1.05868e-14	0.315463	0.713	0.427	1.86084e-10	1	ZNF204P
USP1	1.20569e-14	0.320658	0.798	0.571	2.11924e-10	1	USP1
PSIP1	1.22701e-14	0.315469	0.81	0.577	2.15672e-10	1	PSIP1
FYN	1.24533e-14	0.361327	0.721	0.459	2.18891e-10	1	FYN
NCOR2	1.31555e-14	0.314901	0.713	0.469	2.31234e-10	1	NCOR2
ABR	1.33916e-14	0.323034	0.806	0.575	2.35384e-10	1	ABR
RAB261	1.3978e-14	0.332193	0.798	0.467	2.45691e-10	1	RAB26
DUSP26	1.46714e-14	0.337534	0.69	0.4	2.57879e-10	1	DUSP26
UAP1L1	1.50295e-14	0.290861	0.368	0.169	2.64174e-10	1	UAP1L1
SLC30A81	1.69413e-14	0.405779	0.996	0.801	2.97778e-10	1	SLC30A8
KLHL12	1.70035e-14	0.316057	0.748	0.512	2.98871e-10	1	KLHL12
FAM174B	1.82799e-14	0.303473	0.88	0.647	3.21306e-10	1	FAM174B
PRPS11	2.26619e-14	0.313826	0.857	0.612	3.98328e-10	1	PRPS1
EIF5A2	2.67575e-14	0.292814	0.461	0.237	4.70316e-10	1	EIF5A2
MED9	2.74719e-14	0.261525	0.446	0.215	4.82873e-10	1	MED9
EPHX21	2.84767e-14	0.318909	0.756	0.489	5.00536e-10	1	EPHX2
RAB9B	2.8507e-14	0.331044	0.574	0.318	5.01067e-10	1	RAB9B
LYRM5	3.30647e-14	0.307558	0.717	0.454	5.81179e-10	1	LYRM5
CC2D1B	3.35593e-14	0.340219	0.671	0.435	5.89872e-10	1	CC2D1B
C11orf1	3.3638e-14	0.318445	0.752	0.517	5.91255e-10	1	C11orf1
LRIG1	3.45315e-14	0.309608	0.609	0.365	6.0696e-10	1	LRIG1
ARHGEF9	3.5971e-14	0.330136	0.733	0.48	6.32262e-10	1	ARHGEF9
PREX11	3.692e-14	0.279448	0.492	0.244	6.48942e-10	1	PREX1
COBLL1	3.76359e-14	0.347179	0.775	0.54	6.61527e-10	1	COBLL1
PTENP1	3.89462e-14	0.334368	0.628	0.391	6.84557e-10	1	PTENP1
REPIN1	4.04969e-14	0.301933	0.88	0.683	7.11814e-10	1	REPIN1
MTSS1	4.10994e-14	0.324932	0.74	0.514	7.22404e-10	1	MTSS1
DLGAP4	4.4171e-14	0.3115	0.876	0.69	7.76394e-10	1	DLGAP4
SLC4A7	4.64343e-14	0.341602	0.76	0.503	8.16175e-10	1	SLC4A7
FBXO17	4.74527e-14	0.335918	0.713	0.478	8.34077e-10	1	FBXO17
TXNRD1	5.14991e-14	0.303865	0.911	0.73	9.05199e-10	1	TXNRD1
CELF4	5.59444e-14	0.323846	0.86	0.585	9.83335e-10	1	CELF4
USP30	6.19031e-14	0.293446	0.605	0.345	1.08807e-09	1	USP30
COMMD10	6.23506e-14	0.311521	0.705	0.473	1.09594e-09	1	COMMD10
PKNOX1	6.54908e-14	0.29151	0.632	0.377	1.15113e-09	1	PKNOX1
RAB22A	7.43022e-14	0.257899	0.946	0.811	1.30601e-09	1	RAB22A
HECTD4	7.81924e-14	0.250129	0.953	0.821	1.37439e-09	1	HECTD4
MIR7-3HG1	7.83504e-14	0.348248	0.946	0.685	1.37716e-09	1	MIR7-3HG
PKIA1	8.34007e-14	0.300976	0.5	0.256	1.46593e-09	1	PKIA
FOXJ3	8.58452e-14	0.286085	0.829	0.646	1.5089e-09	1	FOXJ3
KLF13	8.8102e-14	0.323705	0.853	0.608	1.54857e-09	1	KLF13
HSPA4L	9.03042e-14	0.300826	0.5	0.263	1.58728e-09	1	HSPA4L
CDKN2C	9.43647e-14	0.328338	0.415	0.208	1.65865e-09	1	CDKN2C
FBXO8	9.51863e-14	0.301664	0.674	0.425	1.67309e-09	1	FBXO8
CENPC1	1.00924e-13	0.315273	0.674	0.431	1.77395e-09	1	CENPC1
GYG1	1.25815e-13	0.289181	0.841	0.67	2.21145e-09	1	GYG1
G3BP1	1.30109e-13	0.278171	0.822	0.663	2.28692e-09	1	G3BP1
AMPD2	1.30195e-13	0.306041	0.748	0.508	2.28843e-09	1	AMPD2
WDYHV1	1.4652e-13	0.271351	0.492	0.263	2.57537e-09	1	WDYHV1
PNMA2	1.51029e-13	0.346805	0.969	0.692	2.65463e-09	1	PNMA2
GNPDA2	1.65076e-13	0.268981	0.516	0.273	2.90154e-09	1	GNPDA2
KIAA1737	1.68771e-13	0.291264	0.698	0.447	2.9665e-09	1	KIAA1737
RORA	1.75453e-13	0.31885	0.725	0.489	3.08394e-09	1	RORA
KIAA1598	1.76085e-13	0.258556	0.926	0.784	3.09504e-09	1	KIAA1598
USP51	1.94234e-13	0.288645	0.453	0.228	3.41406e-09	1	USP51
C15orf61	2.09126e-13	0.281327	0.802	0.587	3.6758e-09	1	C15orf61
SCG31	2.13369e-13	0.380871	0.996	0.752	3.75038e-09	1	SCG3
WHAMM	2.16737e-13	0.3344	0.705	0.493	3.80958e-09	1	WHAMM
THAP5	2.25062e-13	0.294463	0.767	0.536	3.95592e-09	1	THAP5
EXOC8	2.50635e-13	0.302467	0.69	0.47	4.40542e-09	1	EXOC8
GDAP1	2.64146e-13	0.3006	0.833	0.601	4.64289e-09	1	GDAP1
AES	2.86963e-13	0.258905	0.915	0.756	5.04394e-09	1	AES
IL6R1	2.96047e-13	0.29868	0.806	0.532	5.20362e-09	1	IL6R
FAM200B	2.98565e-13	0.269561	0.899	0.762	5.24788e-09	1	FAM200B
ACAT1	3.0225e-13	0.304699	0.845	0.617	5.31265e-09	1	ACAT1
CRMP1	3.03648e-13	0.310208	0.826	0.526	5.33722e-09	1	CRMP1
FAM117A	3.05864e-13	0.304079	0.647	0.394	5.37616e-09	1	FAM117A
CDC42EP3	3.08939e-13	0.32731	0.938	0.766	5.43022e-09	1	CDC42EP3
ATF1	3.15879e-13	0.293309	0.725	0.49	5.55221e-09	1	ATF1
TMEM109	3.28829e-13	0.270965	0.946	0.761	5.77983e-09	1	TMEM109
CLIP41	3.51246e-13	0.321964	0.767	0.541	6.17385e-09	1	CLIP4
UNC79	3.5401e-13	0.289723	0.659	0.371	6.22243e-09	1	UNC79
CAMK2N1	3.58422e-13	0.272189	1	0.861	6.29999e-09	1	CAMK2N1
STMN3	3.75631e-13	0.302562	0.802	0.527	6.60247e-09	1	STMN3
SYT11	4.04074e-13	0.297685	0.938	0.727	7.10241e-09	1	SYT11
SLC11A2	4.25526e-13	0.285234	0.895	0.707	7.47948e-09	1	SLC11A2
EPDR1	4.38704e-13	0.304742	0.469	0.254	7.71109e-09	1	EPDR1
SAMD3	4.43392e-13	0.262328	0.512	0.257	7.79351e-09	1	SAMD3
GNAO1	5.4428e-13	0.30156	0.798	0.496	9.56681e-09	1	GNAO1
NCOA3	5.71801e-13	0.309203	0.779	0.595	1.00505e-08	1	NCOA3
MZT1	6.13293e-13	0.293134	0.771	0.537	1.07799e-08	1	MZT1
PDZRN3	6.23614e-13	0.288239	0.593	0.33	1.09613e-08	1	PDZRN3
POLR3F	6.5781e-13	0.297588	0.496	0.278	1.15623e-08	1	POLR3F
RUNDC3A1	8.04264e-13	0.320085	0.88	0.566	1.41365e-08	1	RUNDC3A
BSN1	8.15072e-13	0.283984	0.651	0.368	1.43265e-08	1	BSN
FAM219B	9.15479e-13	0.284553	0.709	0.487	1.60914e-08	1	FAM219B
MADD	9.2051e-13	0.298955	0.725	0.499	1.61798e-08	1	MADD
TERF2	9.32614e-13	0.305903	0.783	0.582	1.63926e-08	1	TERF2
REPS2	9.59964e-13	0.28085	0.492	0.262	1.68733e-08	1	REPS2
TSR2	9.96355e-13	0.293577	0.702	0.476	1.75129e-08	1	TSR2
COPS4	1.04577e-12	0.272578	0.818	0.57	1.83815e-08	1	COPS4
JAKMIP2	1.05193e-12	0.282375	0.57	0.308	1.84898e-08	1	JAKMIP2
ORC3	1.089e-12	0.300046	0.752	0.519	1.91414e-08	1	ORC3
SLC23A2	1.09522e-12	0.277625	0.849	0.634	1.92507e-08	1	SLC23A2
ZCCHC14	1.11142e-12	0.278944	0.829	0.626	1.95354e-08	1	ZCCHC14
ATP6V0E2	1.12363e-12	0.284296	0.849	0.577	1.975e-08	1	ATP6V0E2
AP3B1	1.1855e-12	0.257503	0.907	0.822	2.08376e-08	1	AP3B1
HIVEP2	1.25455e-12	0.296623	0.74	0.513	2.20513e-08	1	HIVEP2
RNF19B	1.38172e-12	0.267062	0.461	0.243	2.42866e-08	1	RNF19B
ALG2	1.38809e-12	0.273564	0.895	0.722	2.43984e-08	1	ALG2
GLRB	1.49354e-12	0.289754	0.562	0.325	2.62519e-08	1	GLRB
NT5DC1	1.58626e-12	0.286778	0.849	0.67	2.78817e-08	1	NT5DC1
RAB3B1	1.77287e-12	0.323645	1	0.836	3.11617e-08	1	RAB3B
TAB2	1.77502e-12	0.264059	0.907	0.764	3.11995e-08	1	TAB2
IGIP	1.845e-12	0.269495	0.787	0.567	3.24296e-08	1	IGIP
MOSPD2	1.87627e-12	0.253839	0.438	0.229	3.29792e-08	1	MOSPD2
PLEKHM2	1.93943e-12	0.289446	0.597	0.371	3.40894e-08	1	PLEKHM2
C7orf41	2.14821e-12	0.272568	0.88	0.686	3.77591e-08	1	C7orf41
UHRF1BP1L	2.44801e-12	0.30224	0.535	0.316	4.30287e-08	1	UHRF1BP1L
SLC25A12	2.51547e-12	0.286058	0.767	0.49	4.42144e-08	1	SLC25A12
TEF	2.61863e-12	0.283287	0.535	0.306	4.60277e-08	1	TEF
FXR1	2.84288e-12	0.26519	0.872	0.721	4.99693e-08	1	FXR1
PLCB1	3.22981e-12	0.286474	0.508	0.277	5.67703e-08	1	PLCB1
PLAGL1	3.50971e-12	0.30196	0.829	0.62	6.16902e-08	1	PLAGL1
LETMD1	3.52018e-12	0.305836	0.783	0.572	6.18742e-08	1	LETMD1
SOWAHA1	3.58145e-12	0.281943	0.597	0.342	6.29512e-08	1	SOWAHA
ZBTB38	3.59054e-12	0.2697	0.895	0.736	6.31109e-08	1	ZBTB38
ABHD10	3.94563e-12	0.279595	0.705	0.481	6.93524e-08	1	ABHD10
RNF2	4.16148e-12	0.292131	0.566	0.338	7.31463e-08	1	RNF2
FAM162A	4.24271e-12	0.266821	0.872	0.671	7.45741e-08	1	FAM162A
NR1D2	4.52492e-12	0.310203	0.76	0.555	7.95346e-08	1	NR1D2
OTUD3	4.64257e-12	0.262306	0.519	0.291	8.16025e-08	1	OTUD3
PNMA1	5.03133e-12	0.25855	0.93	0.768	8.84357e-08	1	PNMA1
PHYH	5.28126e-12	0.287354	0.733	0.516	9.28287e-08	1	PHYH
KIF21A	5.33691e-12	0.255894	0.922	0.769	9.38069e-08	1	KIF21A
RRAGC	5.40049e-12	0.278007	0.81	0.591	9.49244e-08	1	RRAGC
DMXL2	5.42507e-12	0.266608	0.837	0.608	9.53565e-08	1	DMXL2
RPA2	5.42868e-12	0.288469	0.733	0.517	9.54199e-08	1	RPA2
UNC13A1	5.44965e-12	0.313765	0.907	0.61	9.57885e-08	1	UNC13A
PFKM	5.83304e-12	0.292455	0.678	0.422	1.02527e-07	1	PFKM
OSGIN2	5.92266e-12	0.297793	0.609	0.385	1.04103e-07	1	OSGIN2
HCFC2	6.59115e-12	0.276227	0.814	0.581	1.15853e-07	1	HCFC2
EPB41	6.61592e-12	0.27874	0.457	0.251	1.16288e-07	1	EPB41
PGBD5	6.78454e-12	0.295776	0.682	0.464	1.19252e-07	1	PGBD5
PTPRJ	7.12055e-12	0.272157	0.764	0.55	1.25158e-07	1	PTPRJ
PRKAG2	8.02338e-12	0.291893	0.682	0.458	1.41027e-07	1	PRKAG2
SUSD1	8.16335e-12	0.293948	0.702	0.484	1.43487e-07	1	SUSD1
ST8SIA3	8.41824e-12	0.28274	0.864	0.541	1.47967e-07	1	ST8SIA3
MAN2A2	8.50691e-12	0.255424	0.853	0.655	1.49526e-07	1	MAN2A2
PNMAL1	8.88888e-12	0.270764	0.729	0.454	1.5624e-07	1	PNMAL1
GNA13	9.09376e-12	0.281861	0.822	0.602	1.59841e-07	1	GNA13
GALNT10	9.26434e-12	0.310214	0.484	0.286	1.62839e-07	1	GALNT10
RMND5A	9.30463e-12	0.293274	0.845	0.65	1.63547e-07	1	RMND5A
PLOD2	9.52388e-12	0.254162	0.93	0.774	1.67401e-07	1	PLOD2
ARHGAP24	9.67427e-12	0.250488	0.399	0.203	1.70045e-07	1	ARHGAP24
NDRG4	1.07527e-11	0.31032	0.616	0.375	1.89001e-07	1	NDRG4
CHST91	1.09799e-11	0.277375	0.702	0.43	1.92993e-07	1	CHST9
GPRASP1	1.16026e-11	0.29279	0.767	0.501	2.03939e-07	1	GPRASP1
KCNK17	1.2209e-11	0.3	0.612	0.355	2.14597e-07	1	KCNK17
DNAJC6	1.28639e-11	0.283058	0.709	0.442	2.26109e-07	1	DNAJC6
LRRC42	1.32459e-11	0.273281	0.651	0.427	2.32822e-07	1	LRRC42
MAML3	1.33877e-11	0.266462	0.535	0.309	2.35315e-07	1	MAML3
TBCC	1.35507e-11	0.264829	0.81	0.609	2.3818e-07	1	TBCC
SOCS7	1.47233e-11	0.276357	0.795	0.61	2.58792e-07	1	SOCS7
FAM169A	1.58584e-11	0.291771	0.659	0.417	2.78743e-07	1	FAM169A
SAYSD1	1.65125e-11	0.272409	0.671	0.441	2.9024e-07	1	SAYSD1
ACACA	1.75226e-11	0.258611	0.62	0.39	3.07995e-07	1	ACACA
TANC2	1.9083e-11	0.285046	0.748	0.532	3.35422e-07	1	TANC2
C6orf1	1.94493e-11	0.284897	0.62	0.403	3.41861e-07	1	C6orf1
IER3	2.10553e-11	0.401831	0.779	0.603	3.70089e-07	1	IER3
LOC100506548	2.15844e-11	0.299329	0.69	0.468	3.79388e-07	1	LOC100506548
SLC25A36	2.25591e-11	0.254575	0.88	0.714	3.96521e-07	1	SLC25A36
FTH1P3	2.52909e-11	0.268013	0.946	0.793	4.44538e-07	1	FTH1P3
DNAJC12	2.55683e-11	0.275898	0.907	0.694	4.49414e-07	1	DNAJC12
EXOC2	2.57338e-11	0.286419	0.705	0.48	4.52323e-07	1	EXOC2
UTRN	2.70469e-11	0.293197	0.822	0.548	4.75404e-07	1	UTRN
UNC13B	2.97956e-11	0.276531	0.616	0.397	5.23717e-07	1	UNC13B
RRN3	3.43323e-11	0.268343	0.775	0.599	6.03458e-07	1	RRN3
BTBD1	3.46684e-11	0.2705	0.779	0.578	6.09366e-07	1	BTBD1
ELMO2	3.49922e-11	0.278744	0.64	0.434	6.15057e-07	1	ELMO2
CDKN1A	3.85101e-11	0.358387	0.787	0.565	6.76891e-07	1	CDKN1A
CLASP2	3.8836e-11	0.266948	0.783	0.595	6.82621e-07	1	CLASP2
SMAD7	3.90374e-11	0.252729	0.504	0.292	6.8616e-07	1	SMAD7
NIN	4.51239e-11	0.281351	0.709	0.476	7.93142e-07	1	NIN
PTAR1	4.65095e-11	0.271762	0.81	0.631	8.17498e-07	1	PTAR1
FBXO3	5.24963e-11	0.265276	0.733	0.528	9.22728e-07	1	FBXO3
TMEM132D	5.40806e-11	0.259792	0.539	0.299	9.50575e-07	1	TMEM132D
RNF180	5.41228e-11	0.266743	0.5	0.291	9.51316e-07	1	RNF180
ZFP62	5.68849e-11	0.276682	0.674	0.452	9.99865e-07	1	ZFP62
C21orf581	5.95955e-11	0.277864	0.764	0.481	1.04751e-06	1	C21orf58
FOXN2	6.33643e-11	0.264824	0.539	0.329	1.11375e-06	1	FOXN2
BCOR	6.63276e-11	0.273912	0.643	0.412	1.16584e-06	1	BCOR
ACSL1	6.93751e-11	0.262109	0.771	0.565	1.21941e-06	1	ACSL1
KDM1B	7.24552e-11	0.250032	0.605	0.38	1.27354e-06	1	KDM1B
ANGEL1	7.66379e-11	0.261941	0.671	0.463	1.34706e-06	1	ANGEL1
NRCAM	7.77839e-11	0.267119	0.938	0.729	1.36721e-06	1	NRCAM
CYFIP2	8.2103e-11	0.273956	0.795	0.554	1.44312e-06	1	CYFIP2
RAB31	9.63828e-11	0.262637	0.702	0.454	1.69412e-06	1	RAB31
RCBTB1	9.8537e-11	0.279502	0.64	0.421	1.73198e-06	1	RCBTB1
FNIP1	1.05678e-10	0.263307	0.818	0.615	1.8575e-06	1	FNIP1
PRMT6	1.11021e-10	0.260339	0.655	0.436	1.95141e-06	1	PRMT6
INPP4A	1.16005e-10	0.260556	0.744	0.533	2.03902e-06	1	INPP4A
SMPD1	1.36393e-10	0.26081	0.682	0.435	2.39738e-06	1	SMPD1
NAV2	1.4916e-10	0.29727	0.674	0.452	2.62178e-06	1	NAV2
TMEM99	1.54035e-10	0.253131	0.566	0.353	2.70748e-06	1	TMEM99
SV2A1	1.54614e-10	0.283332	0.853	0.592	2.71765e-06	1	SV2A
MYO5A	1.93648e-10	0.261213	0.88	0.702	3.40374e-06	1	MYO5A
ELP41	2.1688e-10	0.259633	0.752	0.537	3.81211e-06	1	ELP4
RAB11FIP5	2.18781e-10	0.264191	0.69	0.46	3.84551e-06	1	RAB11FIP5
PJA1	2.3487e-10	0.256165	0.736	0.509	4.12831e-06	1	PJA1
DCK	2.5428e-10	0.262839	0.585	0.362	4.46948e-06	1	DCK
TMEM132A	2.5444e-10	0.262328	0.531	0.323	4.47229e-06	1	TMEM132A
RCOR3	2.56521e-10	0.257265	0.729	0.532	4.50886e-06	1	RCOR3
ST3GAL6	2.62856e-10	0.25081	0.504	0.29	4.62022e-06	1	ST3GAL6
MAGEL2	2.6362e-10	0.253642	0.519	0.297	4.63364e-06	1	MAGEL2
RCAN21	2.68648e-10	0.26428	0.93	0.732	4.72202e-06	1	RCAN2
C22orf39	2.79068e-10	0.253258	0.721	0.499	4.90517e-06	1	C22orf39
C1orf172	2.87497e-10	0.26436	0.674	0.438	5.05334e-06	1	C1orf172
CCNG2	2.99315e-10	0.286256	0.647	0.404	5.26106e-06	1	CCNG2
SLC1A4	3.00668e-10	0.268023	0.674	0.433	5.28485e-06	1	SLC1A4
TOR1AIP1	3.06587e-10	0.256505	0.837	0.672	5.38888e-06	1	TOR1AIP1
DIXDC1	3.16256e-10	0.254025	0.512	0.302	5.55883e-06	1	DIXDC1
DCUN1D4	3.25912e-10	0.274392	0.694	0.502	5.72855e-06	1	DCUN1D4
CEP63	3.98075e-10	0.264547	0.721	0.525	6.99696e-06	1	CEP63
SETD7	4.15301e-10	0.273703	0.845	0.589	7.29975e-06	1	SETD7
AP1AR	4.15772e-10	0.261708	0.655	0.456	7.30802e-06	1	AP1AR
AGTPBP1	5.24413e-10	0.271487	0.57	0.369	9.2176e-06	1	AGTPBP1
CRYL1	5.36119e-10	0.266811	0.752	0.526	9.42336e-06	1	CRYL1
CDK14	5.40212e-10	0.263859	0.562	0.356	9.49531e-06	1	CDK14
CDK5RAP2	5.93217e-10	0.25846	0.659	0.457	1.0427e-05	1	CDK5RAP2
CBX4	6.00074e-10	0.273234	0.705	0.507	1.05475e-05	1	CBX4
SGMS2	6.06726e-10	0.277176	0.74	0.55	1.06644e-05	1	SGMS2
ANKHD1	6.26541e-10	0.252506	0.798	0.601	1.10127e-05	1	ANKHD1
C9orf72	6.43015e-10	0.251719	0.636	0.405	1.13023e-05	1	C9orf72
VPS37C	7.12692e-10	0.262898	0.585	0.376	1.2527e-05	1	VPS37C
FAM219A	7.14274e-10	0.253479	0.729	0.518	1.25548e-05	1	FAM219A
KDM3A	7.42991e-10	0.26449	0.647	0.44	1.30596e-05	1	KDM3A
TTLL7	7.73143e-10	0.262188	0.624	0.409	1.35895e-05	1	TTLL7
PDZD8	1.01955e-09	0.276303	0.717	0.525	1.79206e-05	1	PDZD8
INPP5F	1.19381e-09	0.263008	0.787	0.602	2.09835e-05	1	INPP5F
PEG3	1.21992e-09	0.267843	0.791	0.546	2.14424e-05	1	PEG3
TMCC1	1.47905e-09	0.252303	0.76	0.532	2.59972e-05	1	TMCC1
AHCYL2	1.53137e-09	0.269539	0.682	0.479	2.69169e-05	1	AHCYL2
ARMCX41	1.61139e-09	0.262979	0.663	0.442	2.83233e-05	1	ARMCX4
THAP11	1.98738e-09	0.251635	0.643	0.443	3.49321e-05	1	THAP11
SLC4A81	2.02156e-09	0.26708	0.655	0.439	3.5533e-05	1	SLC4A8
FAM167A1	2.60158e-09	0.27437	0.833	0.562	4.57281e-05	1	FAM167A
ERRFI1	2.79152e-09	0.251604	0.678	0.463	4.90666e-05	1	ERRFI1
METTL23	2.80203e-09	0.250165	0.678	0.488	4.92512e-05	1	METTL23
SETBP1	3.38024e-09	0.251465	0.69	0.479	5.94145e-05	1	SETBP1
KCNMA11	4.02406e-09	0.279311	0.922	0.632	7.07308e-05	1	KCNMA1
INA1	5.47604e-09	0.289638	0.961	0.701	9.62524e-05	1	INA
SYT41	6.44954e-09	0.271629	0.903	0.586	0.000113363	1	SYT4
UBXN1	6.53197e-09	0.253617	0.705	0.521	0.000114812	1	UBXN1
MAGI2-AS3	1.12862e-08	0.252654	0.833	0.612	0.000198378	1	MAGI2-AS3
MTMR2	1.17503e-08	0.256839	0.69	0.506	0.000206535	1	MTMR2
TSPAN71	1.38927e-08	0.274206	0.973	0.686	0.000244192	1	TSPAN7
XIST1	5.8052e-08	0.266542	0.453	0.267	0.00102038	1	XIST
PPP1R1A1	1.21472e-07	0.298462	0.961	0.694	0.00213512	1	PPP1R1A
MAFB1	1.07623e-06	0.255572	0.992	0.766	0.0189168	1	MAFB
IRX21	2.74257e-100	1.21595	0.996	0.371	4.82061e-96	2	IRX2
PEMT1	4.6938e-92	1.11787	0.915	0.455	8.25029e-88	2	PEMT
COX8A	8.36718e-88	0.535583	1	0.993	1.4707e-83	2	COX8A
TMEM176A1	1.54834e-87	0.929791	0.992	0.665	2.72151e-83	2	TMEM176A
CRYBA21	2.42997e-80	1.15684	0.947	0.415	4.27115e-76	2	CRYBA2
GPX31	3.26706e-80	0.995564	0.943	0.469	5.74251e-76	2	GPX3
PTPRT1	1.31728e-79	0.972709	0.818	0.25	2.31538e-75	2	PTPRT
KCTD121	3.72061e-79	0.937834	0.996	0.712	6.53972e-75	2	KCTD12
LSAMP	4.11699e-79	0.961617	0.636	0.156	7.23643e-75	2	LSAMP
SLC7A21	6.83219e-79	0.715556	1	0.892	1.20089e-74	2	SLC7A2
GC1	2.76139e-78	1.14089	0.996	0.666	4.85369e-74	2	GC
PAPPA21	4.97982e-74	1.05652	0.709	0.217	8.75302e-70	2	PAPPA2
SERF2	1.48121e-73	0.433398	1	0.98	2.60351e-69	2	SERF2
RFX61	6.99609e-73	0.871202	0.968	0.627	1.2297e-68	2	RFX6
GLS1	2.48983e-70	0.743987	0.988	0.87	4.37638e-66	2	GLS
GCG1	8.54651e-70	0.722527	1	1	1.50222e-65	2	GCG
PCSK21	3.42061e-69	0.775215	1	0.932	6.01241e-65	2	PCSK2
SEZ6L1	3.60457e-69	0.942761	0.862	0.397	6.33575e-65	2	SEZ6L
TMEM2361	1.11988e-68	0.93485	0.753	0.231	1.96841e-64	2	TMEM236
PPY	7.76603e-68	0.683441	0.968	0.51	1.36503e-63	2	PPY
PDE3B1	1.60885e-67	0.87035	0.955	0.575	2.82788e-63	2	PDE3B
ARX1	2.26737e-67	0.959135	0.972	0.389	3.98535e-63	2	ARX
NAA201	1.27512e-66	0.5818	1	0.972	2.24128e-62	2	NAA20
DPP41	4.57187e-66	0.858431	0.709	0.228	8.03598e-62	2	DPP4
LOXL41	1.99318e-65	1.08593	0.895	0.381	3.50341e-61	2	LOXL4
LDB21	2.18118e-65	0.895915	0.603	0.159	3.83387e-61	2	LDB2
FAP1	5.65669e-65	0.991222	0.98	0.421	9.94276e-61	2	FAP
FEV1	7.22351e-65	0.963858	0.891	0.385	1.26968e-60	2	FEV
CACNA1A1	7.67041e-65	0.825814	0.964	0.589	1.34823e-60	2	CACNA1A
KIAA12441	4.51848e-64	0.5933	1	0.925	7.94214e-60	2	KIAA1244
PDK31	6.97696e-64	0.744799	0.988	0.725	1.22634e-59	2	PDK3
ALDH1A11	9.22085e-64	0.641028	1	0.958	1.62075e-59	2	ALDH1A1
CNTN11	1.05441e-62	0.748532	0.972	0.623	1.85334e-58	2	CNTN1
CPLX21	2.40047e-62	0.7953	0.943	0.597	4.21931e-58	2	CPLX2
RPS15	4.92968e-62	0.469665	0.988	0.947	8.6649e-58	2	RPS15
SLC29A41	5.70973e-62	0.77795	0.951	0.606	1.0036e-57	2	SLC29A4
PALLD1	1.41136e-61	0.635543	0.988	0.822	2.48076e-57	2	PALLD
CD361	3.74337e-61	0.939316	0.664	0.214	6.57972e-57	2	CD36
VGF1	5.69265e-61	0.770386	1	0.839	1.0006e-56	2	VGF
SCG21	1.3254e-59	0.691676	1	0.895	2.32965e-55	2	SCG2
TM4SF41	1.40221e-58	0.926522	0.996	0.718	2.46466e-54	2	TM4SF4
TMEM176B1	1.93839e-58	0.717693	1	0.808	3.40711e-54	2	TMEM176B
PCSK1N	2.46366e-58	0.749279	0.984	0.681	4.33037e-54	2	PCSK1N
CD99L21	4.07901e-58	0.749301	0.923	0.677	7.16967e-54	2	CD99L2
PLCE11	7.73466e-58	0.99687	0.85	0.368	1.35952e-53	2	PLCE1
SLC30A82	9.49389e-57	0.703199	0.992	0.803	1.66874e-52	2	SLC30A8
HIGD1A1	1.24093e-56	0.559936	0.98	0.828	2.18118e-52	2	HIGD1A
CD46	1.2475e-56	0.481942	0.984	0.916	2.19273e-52	2	CD46
SYT51	2.04124e-56	0.813274	0.765	0.32	3.58789e-52	2	SYT5
KLHL411	5.30091e-56	1.0487	0.773	0.315	9.31741e-52	2	KLHL41
UQCR11	2.92715e-55	0.499135	0.955	0.882	5.14504e-51	2	UQCR11
RGS41	2.99766e-55	0.855594	0.98	0.624	5.26898e-51	2	RGS4
CAPZB	6.38217e-55	0.466758	0.992	0.923	1.12179e-50	2	CAPZB
BTBD111	6.87547e-55	0.767208	0.64	0.21	1.2085e-50	2	BTBD11
CHGB1	3.87196e-54	0.667742	1	0.921	6.80574e-50	2	CHGB
TTR	1.74999e-53	0.563835	1	1	3.07595e-49	2	TTR
NGFRAP1	1.49727e-52	0.435024	0.996	0.979	2.63176e-48	2	NGFRAP1
SLC22A171	1.67971e-52	0.648096	0.992	0.789	2.95242e-48	2	SLC22A17
FABP51	2.55039e-52	0.837017	0.907	0.477	4.48282e-48	2	FABP5
COX17	3.39757e-52	0.392831	0.996	0.978	5.97191e-48	2	COX17
SPOCK31	6.09499e-52	0.753452	0.632	0.204	1.07132e-47	2	SPOCK3
QDPR1	9.06198e-52	0.550213	0.976	0.888	1.59282e-47	2	QDPR
ENPP21	1.93259e-51	0.7085	0.988	0.708	3.3969e-47	2	ENPP2
CST3	2.02477e-51	0.446238	0.98	0.924	3.55893e-47	2	CST3
SLC38A41	2.85744e-51	0.818037	0.911	0.465	5.02252e-47	2	SLC38A4
CPE1	4.77948e-51	0.567788	1	0.925	8.4009e-47	2	CPE
ADRBK2	8.75209e-51	0.596891	0.947	0.796	1.53835e-46	2	ADRBK2
PTPRN1	9.63915e-51	0.604224	0.996	0.78	1.69427e-46	2	PTPRN
MOB1B1	2.18408e-50	0.577746	0.984	0.831	3.83896e-46	2	MOB1B
CLU	6.91139e-50	0.492515	1	0.974	1.21482e-45	2	CLU
SMOC11	2.82676e-49	0.782965	0.806	0.364	4.9686e-45	2	SMOC1
MYL6	4.86507e-49	0.30567	1	0.998	8.55133e-45	2	MYL6
PDK41	5.03026e-49	0.816417	0.951	0.733	8.84168e-45	2	PDK4
PCDH171	1.23018e-47	0.685221	0.947	0.631	2.16228e-43	2	PCDH17
CAMK2G1	3.34598e-47	0.799264	0.781	0.476	5.88124e-43	2	CAMK2G
KIAA13771	1.13822e-46	0.694902	0.96	0.655	2.00065e-42	2	KIAA1377
SLC7A141	1.70422e-46	0.740492	0.826	0.437	2.9955e-42	2	SLC7A14
UBL5	2.36699e-46	0.33895	1	0.975	4.16045e-42	2	UBL5
FSTL51	3.07988e-46	0.762439	0.721	0.288	5.41351e-42	2	FSTL5
SYP1	4.69174e-46	0.65019	0.891	0.59	8.24666e-42	2	SYP
GCH11	1.43737e-45	0.576109	0.992	0.825	2.52646e-41	2	GCH1
P4HTM1	3.1728e-45	0.604282	0.887	0.669	5.57684e-41	2	P4HTM
C22orf32	3.90137e-45	0.500191	0.947	0.821	6.85744e-41	2	C22orf32
SERPINE21	7.90805e-45	0.678469	0.947	0.576	1.39e-40	2	SERPINE2
PAX61	1.07119e-44	0.604676	1	0.777	1.88284e-40	2	PAX6
ATP5J2	1.11854e-44	0.389909	0.992	0.942	1.96605e-40	2	ATP5J2
TMEM59	1.76817e-44	0.309934	1	0.991	3.10791e-40	2	TMEM59
ATP6AP2	1.93921e-44	0.358142	1	0.978	3.40855e-40	2	ATP6AP2
TSPAN21	3.54304e-44	0.671755	0.887	0.582	6.2276e-40	2	TSPAN2
UQCRQ	3.86488e-44	0.306892	0.996	0.986	6.7933e-40	2	UQCRQ
ARL3	4.53486e-44	0.462959	0.951	0.883	7.97092e-40	2	ARL3
CNIH21	7.17872e-44	0.665472	0.943	0.656	1.2618e-39	2	CNIH2
MYH101	7.43578e-44	0.541379	0.976	0.816	1.30699e-39	2	MYH10
C19orf10	1.36299e-43	0.53308	0.903	0.792	2.39573e-39	2	C19orf10
ATP1B1	3.36024e-43	0.393905	0.996	0.943	5.9063e-39	2	ATP1B1
SCG51	3.534e-43	0.559122	1	0.875	6.21172e-39	2	SCG5
TCEB2	8.71017e-43	0.529425	0.903	0.738	1.53099e-38	2	TCEB2
SYNGR41	9.59552e-43	0.674711	0.591	0.212	1.6866e-38	2	SYNGR4
F101	2.288e-42	0.663902	0.66	0.257	4.02162e-38	2	F10
PRDX5	2.98319e-41	0.378779	0.951	0.92	5.24355e-37	2	PRDX5
GRIA31	2.98623e-41	0.6984	0.769	0.383	5.2489e-37	2	GRIA3
RPLP2	9.64219e-41	0.305335	0.996	0.981	1.69481e-36	2	RPLP2
RIMBP21	1.52093e-40	0.628393	0.927	0.609	2.67334e-36	2	RIMBP2
ERGIC3	3.94034e-40	0.585254	0.822	0.621	6.92593e-36	2	ERGIC3
PLP21	4.5128e-40	0.499122	0.943	0.789	7.93215e-36	2	PLP2
MUC131	5.19348e-40	0.727586	0.903	0.628	9.12857e-36	2	MUC13
NDUFA1	5.36975e-40	0.29756	0.992	0.981	9.43842e-36	2	NDUFA1
MAFB2	1.39764e-39	0.620986	0.996	0.767	2.45663e-35	2	MAFB
CHGA1	1.44119e-39	0.489818	1	0.965	2.53318e-35	2	CHGA
COX7A2	1.72087e-39	0.278615	0.992	0.984	3.02478e-35	2	COX7A2
TUSC3	1.75868e-39	0.380861	0.992	0.958	3.09123e-35	2	TUSC3
FXYD61	3.01365e-39	0.613581	0.951	0.622	5.2971e-35	2	FXYD6
SSTR21	9.31496e-39	0.634998	0.862	0.51	1.63729e-34	2	SSTR2
TMEM147	1.50618e-38	0.458967	0.919	0.807	2.64742e-34	2	TMEM147
ADCY71	4.394e-38	0.582489	0.494	0.159	7.72333e-34	2	ADCY7
CYSTM1	7.76203e-38	0.370741	0.98	0.927	1.36433e-33	2	CYSTM1
PAPSS21	9.68219e-38	0.446821	0.992	0.911	1.70184e-33	2	PAPSS2
TMEM178B1	1.09627e-37	0.669993	0.781	0.475	1.92691e-33	2	TMEM178B
CTSB	1.15853e-37	0.326007	0.988	0.976	2.03635e-33	2	CTSB
KCNMA12	1.19677e-37	0.588057	0.915	0.635	2.10356e-33	2	KCNMA1
ATP5EP2	2.62988e-37	0.301162	1	0.987	4.62254e-33	2	ATP5EP2
DPP62	3.89933e-37	0.587474	0.939	0.625	6.85385e-33	2	DPP6
GPR641	3.97895e-37	0.667028	0.64	0.265	6.99379e-33	2	GPR64
MTMR71	6.14776e-37	0.646112	0.652	0.295	1.08059e-32	2	MTMR7
KIAA13241	1.11567e-36	0.422459	0.992	0.91	1.96102e-32	2	KIAA1324
NDUFB11	1.19613e-36	0.398492	0.951	0.855	2.10244e-32	2	NDUFB11
LRP111	1.74044e-36	0.446305	0.964	0.861	3.05916e-32	2	LRP11
NDUFA7	1.79875e-36	0.415091	0.947	0.877	3.16167e-32	2	NDUFA7
SEZ6L21	2.78378e-36	0.484776	0.939	0.775	4.89304e-32	2	SEZ6L2
ABLIM1	4.25552e-36	0.526951	0.939	0.787	7.47993e-32	2	ABLIM1
RHBDD2	5.67199e-36	0.49807	0.911	0.732	9.96965e-32	2	RHBDD2
RGS9	3.35411e-35	0.667269	0.753	0.408	5.89553e-31	2	RGS9
TCEAL2	3.89854e-35	0.633476	0.838	0.478	6.85246e-31	2	TCEAL2
ZNF618	9.07513e-35	0.592666	0.826	0.634	1.59514e-30	2	ZNF618
PTPRN21	1.16906e-34	0.501283	0.984	0.795	2.05486e-30	2	PTPRN2
NDUFC2	1.65861e-34	0.307157	0.972	0.949	2.91535e-30	2	NDUFC2
IRX11	1.94424e-34	0.56039	0.324	0.076	3.41738e-30	2	IRX1
GNG21	2.21099e-34	0.536377	0.919	0.623	3.88625e-30	2	GNG2
COTL11	2.25475e-34	0.594166	0.802	0.503	3.96317e-30	2	COTL1
H1FX	3.22512e-34	0.647493	0.765	0.523	5.6688e-30	2	H1FX
ADCY11	3.35156e-34	0.665307	0.749	0.414	5.89104e-30	2	ADCY1
SCGB2A11	3.47538e-34	0.663177	0.688	0.351	6.10867e-30	2	SCGB2A1
BEX1	7.06393e-34	0.476847	1	0.896	1.24163e-29	2	BEX1
ABHD151	1.74503e-33	0.530071	0.874	0.657	3.06723e-29	2	ABHD15
C14orf2	1.91396e-33	0.345667	0.964	0.89	3.36417e-29	2	C14orf2
POPDC31	2.10036e-33	0.598353	0.595	0.246	3.6918e-29	2	POPDC3
KCNC11	3.48826e-33	0.500482	0.385	0.11	6.13131e-29	2	KCNC1
LOC1002164791	3.65645e-33	0.565353	0.866	0.546	6.42694e-29	2	LOC100216479
KRTCAP2	7.33609e-33	0.278858	0.988	0.981	1.28947e-28	2	KRTCAP2
FNDC3A	1.0411e-32	0.359439	0.964	0.919	1.82995e-28	2	FNDC3A
TMEM9	1.25661e-32	0.446646	0.883	0.752	2.20874e-28	2	TMEM9
PLK21	1.64212e-32	0.551013	0.927	0.749	2.88635e-28	2	PLK2
EPCAM	2.54527e-32	0.271004	1	0.948	4.47382e-28	2	EPCAM
GPAA1	3.88225e-32	0.490902	0.842	0.677	6.82382e-28	2	GPAA1
SMARCA21	4.84561e-32	0.406195	0.943	0.89	8.51713e-28	2	SMARCA2
FAM210B	5.59312e-32	0.403831	0.931	0.86	9.83103e-28	2	FAM210B
TUBA1B	6.30318e-32	0.286577	1	0.993	1.10791e-27	2	TUBA1B
KCNQ1OT1	6.54652e-32	0.277163	0.996	0.999	1.15068e-27	2	KCNQ1OT1
A1CF1	7.52661e-32	0.569818	0.879	0.604	1.32295e-27	2	A1CF
1961-09-01	8.81388e-32	0.596931	0.729	0.41	1.54922e-27	2	2021-09-06
RPS6KA3	9.18294e-32	0.391159	0.951	0.874	1.61409e-27	2	RPS6KA3
ACVR1C1	1.01356e-31	0.60448	0.81	0.465	1.78153e-27	2	ACVR1C
EIF1AY	6.56234e-31	0.572436	0.68	0.362	1.15346e-26	2	EIF1AY
KCNMB21	8.34672e-31	0.580814	0.83	0.507	1.4671e-26	2	KCNMB2
PRKCE1	8.95033e-31	0.603408	0.664	0.38	1.5732e-26	2	PRKCE
DZIP31	1.08552e-30	0.47713	0.931	0.757	1.90802e-26	2	DZIP3
LOC643406	1.12148e-30	0.37521	0.972	0.896	1.97122e-26	2	LOC643406
LRPAP1	1.14248e-30	0.32819	1	0.948	2.00813e-26	2	LRPAP1
HMGB31	1.4296e-30	0.658816	0.704	0.414	2.51282e-26	2	HMGB3
KCNJ61	1.90313e-30	0.59731	0.753	0.424	3.34513e-26	2	KCNJ6
PHF17	2.96873e-30	0.563114	0.858	0.698	5.21813e-26	2	PHF17
CUTA	3.37954e-30	0.321098	0.96	0.935	5.94022e-26	2	CUTA
PKM	3.97181e-30	0.277992	1	0.993	6.98125e-26	2	PKM
PPP1R1A2	6.02851e-30	0.572381	0.992	0.691	1.05963e-25	2	PPP1R1A
GNAI11	6.57239e-30	0.467989	0.891	0.718	1.15523e-25	2	GNAI1
C19orf771	9.65283e-30	0.572068	0.854	0.544	1.69668e-25	2	C19orf77
CD164	1.06733e-29	0.275296	0.984	0.965	1.87604e-25	2	CD164
SPINT2	1.27846e-29	0.273614	1	0.982	2.24715e-25	2	SPINT2
MAN1A1	1.81635e-29	0.339447	0.992	0.948	3.19259e-25	2	MAN1A1
CPNE3	1.94256e-29	0.313482	0.98	0.951	3.41444e-25	2	CPNE3
CNNM11	2.79683e-29	0.556628	0.757	0.468	4.916e-25	2	CNNM1
GSTA41	3.17054e-29	0.440017	0.919	0.784	5.57286e-25	2	GSTA4
SDC21	4.39957e-29	0.445583	0.927	0.783	7.73312e-25	2	SDC2
ATP2B11	5.1222e-29	0.406674	0.939	0.848	9.00329e-25	2	ATP2B1
APOH1	6.83255e-29	0.612358	0.462	0.172	1.20096e-24	2	APOH
EGFEM1P1	6.97332e-29	0.589144	0.729	0.432	1.2257e-24	2	EGFEM1P
ISL11	1.06957e-28	0.515805	0.968	0.69	1.87999e-24	2	ISL1
PCBD1	1.08058e-28	0.307542	0.976	0.927	1.89933e-24	2	PCBD1
KL1	1.19576e-28	0.524831	0.547	0.229	2.10179e-24	2	KL
IGFBP7	1.73937e-28	0.426496	0.976	0.863	3.05729e-24	2	IGFBP7
C12orf751	1.88459e-28	0.408497	0.98	0.825	3.31254e-24	2	C12orf75
HLA-A	1.90085e-28	0.255617	1	0.998	3.34112e-24	2	HLA-A
PHTF21	1.92142e-28	0.478281	0.903	0.702	3.37729e-24	2	PHTF2
GNAI2	2.21542e-28	0.302977	0.992	0.947	3.89404e-24	2	GNAI2
SDF2L1	2.5841e-28	0.466342	0.842	0.667	4.54208e-24	2	SDF2L1
TMEM1641	3.2942e-28	0.515738	0.806	0.551	5.79021e-24	2	TMEM164
CACNA2D21	3.4517e-28	0.525109	0.814	0.508	6.06706e-24	2	CACNA2D2
DAP	3.59909e-28	0.270318	0.992	0.96	6.32612e-24	2	DAP
GLT1D11	4.81438e-28	0.525193	0.482	0.185	8.46224e-24	2	GLT1D1
RAB3B2	8.2267e-28	0.437984	0.992	0.838	1.44601e-23	2	RAB3B
G6PC31	9.63015e-28	0.39468	0.927	0.818	1.69269e-23	2	G6PC3
ADORA2A1	9.92015e-28	0.475515	0.364	0.115	1.74367e-23	2	ADORA2A
SMARCA11	1.10587e-27	0.385299	0.976	0.858	1.94379e-23	2	SMARCA1
PFN21	1.37791e-27	0.32751	0.996	0.954	2.42195e-23	2	PFN2
NDUFB2	1.70572e-27	0.3113	0.964	0.927	2.99814e-23	2	NDUFB2
KIAA1549L1	2.0346e-27	0.508452	0.47	0.182	3.57622e-23	2	KIAA1549L
NDUFC1	2.63232e-27	0.287015	0.972	0.947	4.62683e-23	2	NDUFC1
NR4A1	2.71998e-27	0.590419	0.713	0.434	4.78091e-23	2	NR4A1
GNG42	2.78864e-27	0.52201	0.911	0.604	4.9016e-23	2	GNG4
NUCKS1	2.88284e-27	0.253543	1	0.993	5.06717e-23	2	NUCKS1
APBB1	2.945e-27	0.532979	0.579	0.299	5.17642e-23	2	APBB1
KCNJ31	3.53329e-27	0.567781	0.753	0.411	6.21046e-23	2	KCNJ3
CSRNP31	5.48239e-27	0.558222	0.761	0.469	9.63639e-23	2	CSRNP3
ATP6V0B	5.55368e-27	0.592256	0.607	0.357	9.7617e-23	2	ATP6V0B
ZDHHC141	9.69737e-27	0.564859	0.684	0.421	1.70451e-22	2	ZDHHC14
VAMP2	1.14485e-26	0.345345	0.98	0.926	2.0123e-22	2	VAMP2
SNAP25	1.69048e-26	0.463796	0.927	0.689	2.97136e-22	2	SNAP25
CLPTM1	1.745e-26	0.457224	0.798	0.674	3.06719e-22	2	CLPTM1
MAB21L3	1.77067e-26	0.26144	1	0.995	3.11231e-22	2	MAB21L3
TMEM14A	2.01347e-26	0.453892	0.838	0.737	3.53908e-22	2	TMEM14A
WDR83OS	2.45283e-26	0.457758	0.798	0.654	4.31133e-22	2	WDR83OS
PEG101	2.80471e-26	0.440543	0.98	0.873	4.92983e-22	2	PEG10
1941-03-01	4.10029e-26	0.532956	0.591	0.293	7.20708e-22	2	2021-03-04
BACE1	6.7778e-26	0.3852	0.915	0.802	1.19133e-21	2	BACE1
LGI31	7.85303e-26	0.462659	0.409	0.152	1.38033e-21	2	LGI3
CNPY2	8.88819e-26	0.309777	0.927	0.904	1.56228e-21	2	CNPY2
CRH1	1.06477e-25	0.572117	0.417	0.154	1.87155e-21	2	CRH
PAK31	1.07272e-25	0.485667	0.923	0.703	1.88552e-21	2	PAK3
PGR1	1.25502e-25	0.517216	0.862	0.544	2.20595e-21	2	PGR
PPM1K1	1.45571e-25	0.436475	0.931	0.772	2.55871e-21	2	PPM1K
PARM11	1.50257e-25	0.420118	0.96	0.778	2.64106e-21	2	PARM1
GCNT11	1.75366e-25	0.544459	0.794	0.527	3.0824e-21	2	GCNT1
C2CD4A1	2.71764e-25	0.65508	0.684	0.407	4.77679e-21	2	C2CD4A
LINC00261	2.88666e-25	0.510674	0.818	0.597	5.07389e-21	2	LINC00261
CALR	3.91491e-25	0.393391	0.87	0.821	6.88124e-21	2	CALR
TBC1D301	4.68967e-25	0.571908	0.632	0.359	8.24303e-21	2	TBC1D30
KCNA51	4.72688e-25	0.541505	0.688	0.371	8.30844e-21	2	KCNA5
RIMS21	5.05558e-25	0.527156	0.822	0.538	8.8862e-21	2	RIMS2
LPPR41	6.30112e-25	0.568035	0.543	0.249	1.10755e-20	2	LPPR4
FAM46A1	6.51448e-25	0.42439	0.911	0.797	1.14505e-20	2	FAM46A
TP53I13	7.02465e-25	0.465352	0.377	0.141	1.23472e-20	2	TP53I13
PSMB6	8.49898e-25	0.326954	0.895	0.855	1.49387e-20	2	PSMB6
TIMM17B	1.21154e-24	0.49273	0.749	0.553	2.12953e-20	2	TIMM17B
NBEAL2	1.22348e-24	0.530005	0.664	0.399	2.1505e-20	2	NBEAL2
DNPH1	1.40364e-24	0.501687	0.749	0.562	2.46717e-20	2	DNPH1
NUCB11	1.44634e-24	0.36339	0.911	0.832	2.54223e-20	2	NUCB1
IFI27L21	1.72864e-24	0.503813	0.745	0.541	3.03844e-20	2	IFI27L2
ROMO1	1.93125e-24	0.349724	0.891	0.812	3.39455e-20	2	ROMO1
MALAT1	2.44421e-24	0.27036	1	1	4.2962e-20	2	MALAT1
PI4KAP2	2.87127e-24	0.492235	0.704	0.471	5.04684e-20	2	PI4KAP2
GNAO11	3.00586e-24	0.503408	0.794	0.498	5.28341e-20	2	GNAO1
VWA5B21	4.12591e-24	0.510529	0.688	0.386	7.25212e-20	2	VWA5B2
ATP9A	4.67618e-24	0.340593	0.951	0.883	8.21932e-20	2	ATP9A
CNIH31	9.00986e-24	0.530372	0.494	0.217	1.58366e-19	2	CNIH3
HSPE1	1.00731e-23	0.27053	0.96	0.936	1.77055e-19	2	HSPE1
KCNIP11	1.02043e-23	0.482251	0.462	0.19	1.79362e-19	2	KCNIP1
SLC37A41	1.23884e-23	0.453883	0.773	0.599	2.1775e-19	2	SLC37A4
SSX2IP1	1.27173e-23	0.466691	0.854	0.627	2.23532e-19	2	SSX2IP
POLR2L	1.97513e-23	0.434632	0.789	0.655	3.47169e-19	2	POLR2L
CERK	2.00567e-23	0.342059	0.939	0.872	3.52537e-19	2	CERK
ATP6V0E21	2.43646e-23	0.454591	0.777	0.588	4.28256e-19	2	ATP6V0E2
KDELR1	2.78824e-23	0.252382	0.964	0.925	4.90089e-19	2	KDELR1
DYNLRB1	2.82809e-23	0.256165	0.968	0.942	4.97093e-19	2	DYNLRB1
MBOAT21	3.21417e-23	0.450576	0.806	0.574	5.64954e-19	2	MBOAT2
PITRM11	3.25982e-23	0.357406	0.899	0.783	5.72979e-19	2	PITRM1
PSME1	3.43257e-23	0.387166	0.874	0.746	6.03342e-19	2	PSME1
HS6ST31	3.56782e-23	0.503125	0.749	0.467	6.27116e-19	2	HS6ST3
CRIP2	4.26532e-23	0.509161	0.559	0.301	7.49715e-19	2	CRIP2
RTN11	4.93389e-23	0.460756	0.927	0.673	8.67229e-19	2	RTN1
H2AFJ	6.21299e-23	0.525176	0.611	0.383	1.09206e-18	2	H2AFJ
SPTSSB1	7.1047e-23	0.486884	0.668	0.336	1.24879e-18	2	SPTSSB
VSTM2L1	8.15457e-23	0.498517	0.453	0.195	1.43333e-18	2	VSTM2L
NDUFB8	1.1218e-22	0.301049	0.943	0.886	1.97179e-18	2	NDUFB8
PDZD21	1.23917e-22	0.489486	0.64	0.341	2.17809e-18	2	PDZD2
LSMD1	1.27477e-22	0.406183	0.834	0.715	2.24067e-18	2	LSMD1
PTGER4	1.33252e-22	0.449776	0.336	0.122	2.34217e-18	2	PTGER4
HTR1F1	1.39595e-22	0.520165	0.486	0.228	2.45366e-18	2	HTR1F
GPC61	2.01183e-22	0.483286	0.64	0.344	3.53619e-18	2	GPC6
ACLY1	2.40548e-22	0.297743	0.968	0.932	4.22812e-18	2	ACLY
TBL1X1	3.44971e-22	0.422718	0.834	0.657	6.06355e-18	2	TBL1X
MAGED2	3.9444e-22	0.309266	0.931	0.869	6.93306e-18	2	MAGED2
NUCB21	4.21504e-22	0.307425	0.968	0.888	7.40878e-18	2	NUCB2
BVES	4.47678e-22	0.414564	0.36	0.136	7.86883e-18	2	BVES
STMN21	5.222e-22	0.518581	0.87	0.546	9.17871e-18	2	STMN2
CD821	1.09067e-21	0.441561	0.781	0.59	1.91707e-17	2	CD82
SLC35F31	1.31789e-21	0.475624	0.567	0.307	2.31645e-17	2	SLC35F3
TPD52	1.66162e-21	0.297199	0.988	0.925	2.92063e-17	2	TPD52
ABHD12	1.8143e-21	0.405795	0.806	0.688	3.18899e-17	2	ABHD12
PAM1	2.29159e-21	0.319606	0.996	0.937	4.02794e-17	2	PAM
MAMLD11	2.30063e-21	0.512082	0.49	0.245	4.04381e-17	2	MAMLD1
NDUFAF3	2.44626e-21	0.363652	0.838	0.721	4.29979e-17	2	NDUFAF3
EMC101	3.15104e-21	0.287122	0.968	0.92	5.53858e-17	2	EMC10
SSTR11	3.80388e-21	0.503343	0.615	0.343	6.68608e-17	2	SSTR1
CBX6	4.48898e-21	0.285762	0.947	0.918	7.89028e-17	2	CBX6
DACH11	7.06764e-21	0.473817	0.781	0.528	1.24228e-16	2	DACH1
CREB3L2	7.48821e-21	0.402428	0.862	0.737	1.3162e-16	2	CREB3L2
CDC42EP31	8.96776e-21	0.412901	0.907	0.771	1.57626e-16	2	CDC42EP3
TMEM1451	9.36055e-21	0.450258	0.421	0.188	1.6453e-16	2	TMEM145
PKD1P1	1.00562e-20	0.291003	0.96	0.923	1.76758e-16	2	PKD1P1
NDUFS8	1.08405e-20	0.485106	0.522	0.29	1.90543e-16	2	NDUFS8
KIF121	1.17232e-20	0.46393	0.587	0.336	2.06059e-16	2	KIF12
ARRDC41	1.3104e-20	0.509147	0.765	0.527	2.3033e-16	2	ARRDC4
MPC21	2.40408e-20	0.294195	0.951	0.881	4.22565e-16	2	MPC2
CHST92	2.7756e-20	0.453648	0.684	0.434	4.87867e-16	2	CHST9
COPE	3.06837e-20	0.416327	0.757	0.616	5.39328e-16	2	COPE
TXNDC111	3.55566e-20	0.42553	0.773	0.602	6.24978e-16	2	TXNDC11
TBC1D9	4.34912e-20	0.361505	0.854	0.753	7.64445e-16	2	TBC1D9
NAV1	4.37868e-20	0.3577	0.951	0.82	7.69641e-16	2	NAV1
SERPINA1	6.31572e-20	0.54478	0.692	0.391	1.11011e-15	2	SERPINA1
NEUROD11	6.46729e-20	0.436177	0.996	0.787	1.13676e-15	2	NEUROD1
LGALSL1	1.36425e-19	0.445768	0.684	0.469	2.39794e-15	2	LGALSL
PPP6R1	1.67545e-19	0.413168	0.757	0.622	2.94494e-15	2	PPP6R1
RPL35	2.0264e-19	0.260394	0.96	0.915	3.5618e-15	2	RPL35
SSR4	2.04124e-19	0.371207	0.834	0.745	3.58788e-15	2	SSR4
MAGED11	2.07623e-19	0.260891	0.972	0.926	3.64939e-15	2	MAGED1
USP9Y	2.38812e-19	0.4516	0.688	0.423	4.19759e-15	2	USP9Y
LRRFIP1	3.07455e-19	0.275787	0.976	0.937	5.40414e-15	2	LRRFIP1
C1orf1221	4.11136e-19	0.308484	0.883	0.832	7.22654e-15	2	C1orf122
CKB1	4.7064e-19	0.415996	0.834	0.672	8.27244e-15	2	CKB
FAM131C1	5.3749e-19	0.473464	0.555	0.308	9.44746e-15	2	FAM131C
REC81	5.90849e-19	0.420856	0.745	0.517	1.03854e-14	2	REC8
IQSEC31	5.981e-19	0.487272	0.579	0.318	1.05128e-14	2	IQSEC3
NPNT1	6.07393e-19	0.552507	0.64	0.403	1.06762e-14	2	NPNT
KCNK3	7.15378e-19	0.409095	0.781	0.571	1.25742e-14	2	KCNK3
EYS	9.95605e-19	0.416861	0.312	0.114	1.74997e-14	2	EYS
NDUFA13	1.15224e-18	0.33629	0.251	0.081	2.02529e-14	2	NDUFA13
BLOC1S1	1.34435e-18	0.368882	0.806	0.659	2.36296e-14	2	BLOC1S1
NEURL1	1.3458e-18	0.445444	0.7	0.485	2.36552e-14	2	NEURL
RIN21	1.50848e-18	0.402658	0.899	0.797	2.65146e-14	2	RIN2
LINC00665	1.7018e-18	0.445887	0.478	0.25	2.99126e-14	2	LINC00665
FADS2	1.75193e-18	0.457247	0.417	0.203	3.07938e-14	2	FADS2
GNE	1.98499e-18	0.331358	0.846	0.746	3.48901e-14	2	GNE
FADS1	2.31136e-18	0.356108	0.923	0.819	4.06268e-14	2	FADS1
FAM96B	2.57069e-18	0.328524	0.858	0.776	4.51849e-14	2	FAM96B
PRDX2	3.07081e-18	0.411748	0.692	0.544	5.39755e-14	2	PRDX2
NT5DC2	3.3249e-18	0.387345	0.368	0.161	5.84418e-14	2	NT5DC2
SCAMP1	3.34947e-18	0.283214	0.935	0.896	5.88737e-14	2	SCAMP1
SLC36A4	4.19212e-18	0.397066	0.761	0.604	7.36849e-14	2	SLC36A4
VWA5A	4.25857e-18	0.332752	0.915	0.805	7.48529e-14	2	VWA5A
FAM135B1	4.38755e-18	0.43889	0.401	0.184	7.712e-14	2	FAM135B
ST182	4.81802e-18	0.455472	0.769	0.52	8.46864e-14	2	ST18
SLC7A81	5.57802e-18	0.392818	0.887	0.689	9.80449e-14	2	SLC7A8
TCEAL3	6.48625e-18	0.301436	0.935	0.864	1.14009e-13	2	TCEAL3
CAPNS1	6.5444e-18	0.316158	0.83	0.751	1.15031e-13	2	CAPNS1
LPPR11	7.97069e-18	0.354675	0.304	0.113	1.40101e-13	2	LPPR1
TH1L	8.02754e-18	0.403963	0.737	0.574	1.411e-13	2	TH1L
ANXA6	1.04244e-17	0.327551	0.903	0.772	1.8323e-13	2	ANXA6
BEX2	1.17671e-17	0.301209	0.988	0.9	2.0683e-13	2	BEX2
RAP1GAP21	1.36943e-17	0.300024	0.988	0.902	2.40705e-13	2	RAP1GAP2
CAMK2B	1.5692e-17	0.405783	0.781	0.536	2.75818e-13	2	CAMK2B
TMEM205	1.57989e-17	0.32543	0.814	0.741	2.77697e-13	2	TMEM205
SYNDIG1	1.82834e-17	0.380088	0.279	0.097	3.21367e-13	2	SYNDIG1
LPPR2	2.16535e-17	0.409063	0.433	0.217	3.80604e-13	2	LPPR2
SCRN1	2.95087e-17	0.267847	0.935	0.883	5.18675e-13	2	SCRN1
PPP2R2B1	3.17395e-17	0.494683	0.583	0.333	5.57885e-13	2	PPP2R2B
HLA-E	5.2113e-17	0.283371	0.943	0.87	9.1599e-13	2	HLA-E
CACNG41	5.89262e-17	0.380346	0.332	0.136	1.03575e-12	2	CACNG4
CFC11	5.93376e-17	0.409914	0.798	0.506	1.04298e-12	2	CFC1
RAB3GAP21	6.43106e-17	0.336426	0.887	0.83	1.13039e-12	2	RAB3GAP2
YIF1A	7.50442e-17	0.445269	0.603	0.428	1.31905e-12	2	YIF1A
MAPK101	7.97291e-17	0.416911	0.599	0.362	1.4014e-12	2	MAPK10
WNT7B	8.95714e-17	0.407392	0.611	0.406	1.5744e-12	2	WNT7B
PRKAG2-AS11	1.15162e-16	0.463444	0.486	0.264	2.02421e-12	2	PRKAG2-AS1
LIMCH11	1.25807e-16	0.355769	0.903	0.753	2.21131e-12	2	LIMCH1
KCNK171	1.33903e-16	0.442454	0.611	0.357	2.35362e-12	2	KCNK17
APOL41	1.5104e-16	0.515427	0.409	0.201	2.65482e-12	2	APOL4
KIAA0319	1.75565e-16	0.437037	0.506	0.278	3.0859e-12	2	KIAA0319
LCLAT11	1.82725e-16	0.402701	0.713	0.544	3.21175e-12	2	LCLAT1
CSGALNACT11	1.90923e-16	0.40629	0.437	0.218	3.35585e-12	2	CSGALNACT1
CELF31	2.68572e-16	0.424734	0.563	0.342	4.72069e-12	2	CELF3
PPAPDC1B1	3.16315e-16	0.277183	0.899	0.853	5.55987e-12	2	PPAPDC1B
TRAPPC5	3.3134e-16	0.438922	0.449	0.26	5.82397e-12	2	TRAPPC5
TCTA1	3.70022e-16	0.34626	0.838	0.737	6.50388e-12	2	TCTA
MAP7	6.93972e-16	0.304666	0.874	0.792	1.21979e-11	2	MAP7
GCLM	7.53409e-16	0.300416	0.919	0.844	1.32427e-11	2	GCLM
PDXDC2P	8.81361e-16	0.41276	0.648	0.459	1.54917e-11	2	PDXDC2P
GGA21	9.15759e-16	0.332492	0.814	0.737	1.60963e-11	2	GGA2
SNRPB	9.85394e-16	0.287191	0.879	0.826	1.73203e-11	2	SNRPB
FAM153C1	1.11236e-15	0.430536	0.498	0.302	1.95519e-11	2	FAM153C
TTC81	1.26351e-15	0.362631	0.785	0.639	2.22086e-11	2	TTC8
DUSP8	1.57332e-15	0.399441	0.591	0.388	2.76543e-11	2	DUSP8
STMN31	1.61959e-15	0.371681	0.741	0.537	2.84675e-11	2	STMN3
REEP41	1.7989e-15	0.413277	0.7	0.542	3.16192e-11	2	REEP4
NPIP	1.8738e-15	0.290891	0.895	0.841	3.29357e-11	2	NPIP
TXNL4A	2.20561e-15	0.287622	0.818	0.75	3.8768e-11	2	TXNL4A
FLNB	2.27394e-15	0.277983	0.919	0.85	3.9969e-11	2	FLNB
LDLRAP11	2.38734e-15	0.366721	0.753	0.623	4.19622e-11	2	LDLRAP1
CMIP	2.54482e-15	0.253283	0.951	0.91	4.47304e-11	2	CMIP
ELL21	2.82261e-15	0.260975	0.964	0.895	4.96129e-11	2	ELL2
CACNB21	2.93177e-15	0.432109	0.498	0.291	5.15317e-11	2	CACNB2
SH3KBP11	3.0926e-15	0.377445	0.781	0.578	5.43586e-11	2	SH3KBP1
SLC8A21	3.19487e-15	0.405733	0.611	0.392	5.61562e-11	2	SLC8A2
VWA1	3.26834e-15	0.414977	0.543	0.352	5.74476e-11	2	VWA1
QPCT1	3.51658e-15	0.342318	0.984	0.794	6.18109e-11	2	QPCT
ODF2L	3.79256e-15	0.31811	0.862	0.774	6.66618e-11	2	ODF2L
SLC38A10	3.95011e-15	0.283578	0.874	0.802	6.94312e-11	2	SLC38A10
SLC25A531	3.97548e-15	0.399812	0.721	0.476	6.9877e-11	2	SLC25A53
SDF4	5.45469e-15	0.390724	0.64	0.493	9.58771e-11	2	SDF4
ITPR11	5.51243e-15	0.433502	0.559	0.352	9.6892e-11	2	ITPR1
RUNDC3A2	5.71304e-15	0.366673	0.81	0.577	1.00418e-10	2	RUNDC3A
ALPK31	6.00019e-15	0.323559	0.911	0.749	1.05465e-10	2	ALPK3
OTUB1	6.4564e-15	0.298124	0.802	0.729	1.13484e-10	2	OTUB1
TMEM141	6.8452e-15	0.389678	0.644	0.498	1.20318e-10	2	TMEM141
LSM7	8.41774e-15	0.394914	0.498	0.32	1.47959e-10	2	LSM7
GDI1	8.55412e-15	0.255298	0.907	0.864	1.50356e-10	2	GDI1
ANKH1	8.69613e-15	0.315905	0.919	0.771	1.52852e-10	2	ANKH
C14orf1011	9.38888e-15	0.423037	0.66	0.517	1.65028e-10	2	C14orf101
FAM135A	1.02626e-14	0.400125	0.733	0.572	1.80385e-10	2	FAM135A
NOMO1	1.35914e-14	0.269004	0.834	0.789	2.38896e-10	2	NOMO1
PYROXD21	1.47054e-14	0.450284	0.462	0.244	2.58476e-10	2	PYROXD2
ADCY21	1.62089e-14	0.361107	0.271	0.106	2.84904e-10	2	ADCY2
VPS28	1.67454e-14	0.366799	0.709	0.592	2.94334e-10	2	VPS28
NLRP12	1.79456e-14	0.408368	0.692	0.583	3.15429e-10	2	NLRP12
PLD31	1.80478e-14	0.400905	0.575	0.391	3.17227e-10	2	PLD3
FOXJ1	1.86071e-14	0.39404	0.401	0.204	3.27057e-10	2	FOXJ1
ECH1	2.01344e-14	0.265888	0.919	0.856	3.53902e-10	2	ECH1
GNAZ1	2.17378e-14	0.375359	0.648	0.454	3.82086e-10	2	GNAZ
TLCD2	2.62795e-14	0.267079	0.85	0.807	4.61915e-10	2	TLCD2
FOXA2	2.90757e-14	0.266425	0.943	0.873	5.11064e-10	2	FOXA2
AAED11	3.07481e-14	0.413507	0.53	0.363	5.4046e-10	2	AAED1
PRKCSH	3.1041e-14	0.350855	0.684	0.534	5.45608e-10	2	PRKCSH
SZRD1	4.00523e-14	0.329806	0.721	0.616	7.03999e-10	2	SZRD1
P4HA21	4.23691e-14	0.32631	0.757	0.646	7.44722e-10	2	P4HA2
LINC006431	4.73774e-14	0.382308	0.737	0.491	8.32753e-10	2	LINC00643
C18orf421	4.93721e-14	0.354786	0.409	0.212	8.67814e-10	2	C18orf42
HPS11	5.41497e-14	0.314637	0.854	0.767	9.51789e-10	2	HPS1
SPC251	5.49418e-14	0.493213	0.502	0.295	9.65713e-10	2	SPC25
NOL41	5.60773e-14	0.369283	0.883	0.611	9.85671e-10	2	NOL4
SIK31	5.72897e-14	0.314363	0.83	0.747	1.00698e-09	2	SIK3
CRMP11	6.35254e-14	0.357055	0.737	0.539	1.11659e-09	2	CRMP1
CNTN41	6.35498e-14	0.413507	0.628	0.429	1.11701e-09	2	CNTN4
APOA1BP	6.43862e-14	0.256302	0.874	0.821	1.13172e-09	2	APOA1BP
LINC00473	6.86036e-14	0.369652	0.283	0.117	1.20584e-09	2	LINC00473
FAM84A1	8.51071e-14	0.460026	0.526	0.313	1.49593e-09	2	FAM84A
SLC6A4	9.155e-14	0.333855	0.709	0.556	1.60917e-09	2	SLC6A4
TTTY15	9.79578e-14	0.374956	0.478	0.271	1.7218e-09	2	TTTY15
USH1C1	1.26624e-13	0.359223	0.818	0.614	2.22567e-09	2	USH1C
LOC730101	1.83739e-13	0.431741	0.441	0.253	3.22958e-09	2	LOC730101
FKBP2	1.93323e-13	0.282492	0.83	0.787	3.39804e-09	2	FKBP2
PNMA21	2.15e-13	0.329573	0.919	0.7	3.77906e-09	2	PNMA2
PTOV1	2.55887e-13	0.380722	0.51	0.33	4.49772e-09	2	PTOV1
C3orf801	2.63643e-13	0.328235	0.332	0.15	4.63406e-09	2	C3orf80
FOXP4	2.9562e-13	0.357779	0.53	0.338	5.19612e-09	2	FOXP4
CERS6	2.96259e-13	0.298378	0.822	0.711	5.20735e-09	2	CERS6
C2CD4B1	3.42383e-13	0.441856	0.632	0.423	6.01807e-09	2	C2CD4B
APLP11	3.71143e-13	0.304835	0.98	0.816	6.52358e-09	2	APLP1
LINC00667	3.74887e-13	0.370995	0.66	0.522	6.58939e-09	2	LINC00667
STAT41	3.75989e-13	0.356312	0.409	0.212	6.60875e-09	2	STAT4
ST8SIA31	3.78647e-13	0.357023	0.733	0.56	6.65547e-09	2	ST8SIA3
SCARNA22	4.53431e-13	0.341822	0.393	0.208	7.96995e-09	2	SCARNA22
NLGN21	4.9249e-13	0.383224	0.591	0.424	8.65649e-09	2	NLGN2
PCNX	5.23521e-13	0.347343	0.741	0.635	9.20193e-09	2	PCNX
HMP191	6.93853e-13	0.341368	0.389	0.184	1.21958e-08	2	HMP19
PAPSS1	7.20067e-13	0.30972	0.749	0.665	1.26566e-08	2	PAPSS1
TAF10	8.60246e-13	0.281039	0.846	0.767	1.51205e-08	2	TAF10
ANAPC11	1.02111e-12	0.320382	0.749	0.674	1.79481e-08	2	ANAPC11
RIIAD11	1.18843e-12	0.31303	0.259	0.11	2.08891e-08	2	RIIAD1
ANK21	1.24407e-12	0.367543	0.291	0.13	2.18671e-08	2	ANK2
PCDHB4	1.30279e-12	0.434335	0.36	0.191	2.28991e-08	2	PCDHB4
FBLL11	1.30544e-12	0.361919	0.441	0.261	2.29457e-08	2	FBLL1
C7orf50	1.31836e-12	0.32641	0.607	0.465	2.31729e-08	2	C7orf50
MBOAT7	1.34186e-12	0.392112	0.409	0.246	2.35858e-08	2	MBOAT7
GFOD21	1.36707e-12	0.331374	0.684	0.562	2.40289e-08	2	GFOD2
SFXN2	1.51545e-12	0.313471	0.291	0.136	2.6637e-08	2	SFXN2
MBOAT41	1.52937e-12	0.305347	0.255	0.105	2.68817e-08	2	MBOAT4
FBXL5	1.86965e-12	0.322269	0.745	0.662	3.28628e-08	2	FBXL5
ENAM1	1.89415e-12	0.383026	0.441	0.253	3.32935e-08	2	ENAM
NPC1L1	2.43785e-12	0.349697	0.336	0.168	4.28501e-08	2	NPC1L1
FIBP	2.66386e-12	0.369678	0.368	0.211	4.68227e-08	2	FIBP
TLE2	2.76515e-12	0.349086	0.571	0.398	4.86031e-08	2	TLE2
CERCAM1	3.14326e-12	0.342909	0.696	0.509	5.52491e-08	2	CERCAM
NOVA11	3.18139e-12	0.329907	0.607	0.422	5.59192e-08	2	NOVA1
WNT41	3.56594e-12	0.347844	0.765	0.528	6.26785e-08	2	WNT4
LOC5506431	3.60863e-12	0.277312	0.794	0.718	6.34289e-08	2	LOC550643
MAPRE3	3.65596e-12	0.33864	0.405	0.227	6.42609e-08	2	MAPRE3
MYO101	3.72461e-12	0.390713	0.765	0.627	6.54674e-08	2	MYO10
PPP3CB	3.92457e-12	0.268891	0.85	0.774	6.89821e-08	2	PPP3CB
PTS	4.28785e-12	0.272639	0.798	0.714	7.53676e-08	2	PTS
NMB1	4.92498e-12	0.380389	0.34	0.18	8.65663e-08	2	NMB
SIPA1L3	5.61495e-12	0.38562	0.603	0.472	9.86939e-08	2	SIPA1L3
NME41	5.61758e-12	0.30036	0.781	0.692	9.87401e-08	2	NME4
SCG32	6.31057e-12	0.356989	0.992	0.754	1.10921e-07	2	SCG3
CADPS1	8.08608e-12	0.328246	0.939	0.69	1.42129e-07	2	CADPS
ZNF91	8.16837e-12	0.30865	0.777	0.671	1.43575e-07	2	ZNF91
CCDC124	8.19688e-12	0.319346	0.348	0.187	1.44077e-07	2	CCDC124
MAP7D21	8.8539e-12	0.368132	0.494	0.303	1.55625e-07	2	MAP7D2
HEPACAM21	9.4158e-12	0.329701	0.769	0.527	1.65501e-07	2	HEPACAM2
PRKCQ-AS11	9.73524e-12	0.332404	0.348	0.178	1.71116e-07	2	PRKCQ-AS1
UCKL1	1.02281e-11	0.341052	0.534	0.373	1.7978e-07	2	UCKL1
SYT71	1.0652e-11	0.337985	0.947	0.703	1.8723e-07	2	SYT7
LOC642366	1.08907e-11	0.356423	0.49	0.288	1.91425e-07	2	LOC642366
EIF5A	1.11422e-11	0.347571	0.543	0.392	1.95846e-07	2	EIF5A
CHD3	1.27864e-11	0.263895	0.842	0.79	2.24746e-07	2	CHD3
OCRL1	1.29614e-11	0.312078	0.729	0.592	2.27822e-07	2	OCRL
HECTD41	1.55472e-11	0.251509	0.879	0.832	2.73273e-07	2	HECTD4
COX7A1	1.57767e-11	0.382445	0.372	0.212	2.77308e-07	2	COX7A1
PRLR1	1.9085e-11	0.36114	0.433	0.253	3.35456e-07	2	PRLR
COX111	1.94232e-11	0.299279	0.709	0.58	3.41401e-07	2	COX11
GPS1	2.10975e-11	0.36232	0.506	0.359	3.70831e-07	2	GPS1
SGPL1	2.11298e-11	0.281369	0.798	0.722	3.71399e-07	2	SGPL1
RPS18	2.46839e-11	0.284776	0.777	0.682	4.33868e-07	2	RPS18
SORBS3	2.47174e-11	0.302016	0.267	0.125	4.34458e-07	2	SORBS3
PGM5P2	2.57906e-11	0.272423	0.785	0.7	4.53321e-07	2	PGM5P2
ABCA2	2.58314e-11	0.340864	0.364	0.2	4.54039e-07	2	ABCA2
RPL29	2.59042e-11	0.297106	0.741	0.601	4.55319e-07	2	RPL29
SYDE21	2.88246e-11	0.34269	0.336	0.179	5.06651e-07	2	SYDE2
EPT1	3.2639e-11	0.273403	0.798	0.738	5.73696e-07	2	EPT1
DNER	3.29359e-11	0.391113	0.405	0.232	5.78914e-07	2	DNER
EZR	3.32878e-11	0.264767	0.838	0.746	5.851e-07	2	EZR
LOC338758	3.63986e-11	0.348419	0.377	0.209	6.39778e-07	2	LOC338758
UXT	3.88087e-11	0.257422	0.769	0.733	6.82141e-07	2	UXT
MLXIPL1	4.06476e-11	0.29802	0.887	0.673	7.14463e-07	2	MLXIPL
THEM61	5.0899e-11	0.338425	0.611	0.476	8.94652e-07	2	THEM6
NRSN2	5.1659e-11	0.273894	0.259	0.119	9.08009e-07	2	NRSN2
NKX2-2	5.50716e-11	0.335244	0.628	0.425	9.67994e-07	2	NKX2-2
NRCAM1	5.52448e-11	0.260673	0.858	0.741	9.71038e-07	2	NRCAM
APOO	5.65782e-11	0.320339	0.587	0.454	9.94475e-07	2	APOO
DYNLT3	6.31524e-11	0.260085	0.749	0.7	1.11003e-06	2	DYNLT3
FGF121	6.50259e-11	0.338887	0.587	0.408	1.14296e-06	2	FGF12
FBXL161	6.67734e-11	0.304295	0.818	0.601	1.17368e-06	2	FBXL16
FLJ45340	6.94227e-11	0.284648	0.794	0.714	1.22024e-06	2	FLJ45340
PROX1	7.10967e-11	0.329881	0.785	0.662	1.24967e-06	2	PROX1
EPB41L4B	1.02351e-10	0.300668	0.761	0.65	1.79903e-06	2	EPB41L4B
ARHGDIA	1.08001e-10	0.279578	0.713	0.632	1.89833e-06	2	ARHGDIA
ATP2B41	1.14849e-10	0.256584	0.822	0.734	2.0187e-06	2	ATP2B4
CXorf571	1.35737e-10	0.305416	0.765	0.584	2.38584e-06	2	CXorf57
WBSCR221	1.43748e-10	0.257658	0.773	0.692	2.52666e-06	2	WBSCR22
MIA21	1.45217e-10	0.363318	0.555	0.404	2.55248e-06	2	MIA2
ITPK1	1.49701e-10	0.260689	0.765	0.675	2.63129e-06	2	ITPK1
CEACAM22P	1.62682e-10	0.286064	0.717	0.631	2.85947e-06	2	CEACAM22P
POLR2J	1.65212e-10	0.319793	0.522	0.383	2.90393e-06	2	POLR2J
SLC35G21	1.69563e-10	0.317314	0.676	0.534	2.9804e-06	2	SLC35G2
ARL6IP4	1.75691e-10	0.315888	0.457	0.308	3.08811e-06	2	ARL6IP4
TRIO	1.77785e-10	0.323965	0.64	0.516	3.12493e-06	2	TRIO
PDIA3P	1.77824e-10	0.275501	0.757	0.704	3.12561e-06	2	PDIA3P
KIF1A1	1.85318e-10	0.261011	0.931	0.794	3.25733e-06	2	KIF1A
SCN3B1	1.88749e-10	0.327564	0.632	0.468	3.31764e-06	2	SCN3B
TMEM208	1.95457e-10	0.306038	0.628	0.544	3.43555e-06	2	TMEM208
GABRB31	2.0111e-10	0.275376	0.862	0.698	3.53491e-06	2	GABRB3
ZNRF11	2.37421e-10	0.318656	0.656	0.539	4.17315e-06	2	ZNRF1
PHPT1	2.43763e-10	0.287676	0.255	0.119	4.28462e-06	2	PHPT1
ARFIP21	2.47374e-10	0.292192	0.721	0.663	4.3481e-06	2	ARFIP2
CD2001	2.52151e-10	0.289847	0.911	0.681	4.43205e-06	2	CD200
DYNC2H1	2.63142e-10	0.316804	0.7	0.571	4.62525e-06	2	DYNC2H1
HIGD2A	2.72497e-10	0.266503	0.794	0.716	4.78968e-06	2	HIGD2A
SPRED31	2.89806e-10	0.294251	0.291	0.145	5.09392e-06	2	SPRED3
STX1A1	2.97907e-10	0.270104	0.858	0.644	5.23631e-06	2	STX1A
SGSM2	3.01266e-10	0.28777	0.785	0.71	5.29535e-06	2	SGSM2
MAOB1	3.07112e-10	0.325111	0.482	0.301	5.3981e-06	2	MAOB
RCN1	3.9003e-10	0.265357	0.753	0.681	6.85556e-06	2	RCN1
STX111	4.03082e-10	0.362263	0.51	0.338	7.08497e-06	2	STX11
INA2	4.14922e-10	0.30451	0.927	0.707	7.29308e-06	2	INA
FAM110B1	4.38676e-10	0.336278	0.437	0.275	7.71061e-06	2	FAM110B
RPH3AL1	4.47847e-10	0.29529	0.684	0.55	7.87181e-06	2	RPH3AL
GLI3	4.78626e-10	0.329024	0.259	0.126	8.41282e-06	2	GLI3
CXXC4	4.79527e-10	0.299857	0.7	0.517	8.42865e-06	2	CXXC4
PLCXD31	5.28339e-10	0.308421	0.866	0.64	9.28662e-06	2	PLCXD3
YIPF21	5.57194e-10	0.351023	0.437	0.293	9.79381e-06	2	YIPF2
AHDC1	5.78081e-10	0.3091	0.603	0.476	1.01609e-05	2	AHDC1
LRRC41	5.91815e-10	0.321989	0.336	0.182	1.04023e-05	2	LRRC4
NAPA	5.92733e-10	0.268266	0.721	0.644	1.04185e-05	2	NAPA
RPS4Y1	6.56188e-10	0.317926	0.789	0.533	1.15338e-05	2	RPS4Y1
VDR1	6.66693e-10	0.367888	0.506	0.341	1.17185e-05	2	VDR
SSBP4	6.69201e-10	0.32022	0.372	0.223	1.17625e-05	2	SSBP4
VSIG1	7.21755e-10	0.299652	0.607	0.482	1.26863e-05	2	VSIG1
UNC13A2	7.37662e-10	0.300377	0.846	0.619	1.29659e-05	2	UNC13A
PEG31	7.55192e-10	0.309106	0.721	0.556	1.3274e-05	2	PEG3
TMEM54	8.22325e-10	0.293179	0.3	0.16	1.4454e-05	2	TMEM54
RCAN22	9.92033e-10	0.258588	0.866	0.741	1.7437e-05	2	RCAN2
MAGI2	1.00274e-09	0.316465	0.607	0.464	1.76251e-05	2	MAGI2
IFT80	1.08515e-09	0.342267	0.575	0.452	1.90736e-05	2	IFT80
CSTF3	1.18835e-09	0.281351	0.644	0.536	2.08876e-05	2	CSTF3
OSBPL61	1.20425e-09	0.330538	0.433	0.275	2.11671e-05	2	OSBPL6
HNF1A-AS1	1.29928e-09	0.314984	0.599	0.46	2.28374e-05	2	HNF1A-AS1
HIP1R	1.34853e-09	0.331514	0.462	0.321	2.37032e-05	2	HIP1R
GNL1	1.35324e-09	0.290017	0.676	0.589	2.37858e-05	2	GNL1
NCAM1	1.39154e-09	0.27835	0.729	0.556	2.44591e-05	2	NCAM1
FAM50A	1.43099e-09	0.315479	0.514	0.387	2.51526e-05	2	FAM50A
R3HCC1L	1.55764e-09	0.329502	0.393	0.252	2.73787e-05	2	R3HCC1L
PIN1	1.85579e-09	0.338587	0.551	0.425	3.26192e-05	2	PIN1
CCT7	2.00496e-09	0.290636	0.656	0.6	3.52412e-05	2	CCT7
DGUOK	2.40889e-09	0.25599	0.745	0.706	4.2341e-05	2	DGUOK
C12orf681	2.44211e-09	0.293532	0.385	0.228	4.29249e-05	2	C12orf68
EMB1	2.5011e-09	0.30252	0.623	0.455	4.39618e-05	2	EMB
GAL3ST1	2.54254e-09	0.291044	0.3	0.166	4.46902e-05	2	GAL3ST1
SCGN1	2.57447e-09	0.319594	0.992	0.838	4.52515e-05	2	SCGN
C10orf101	2.59304e-09	0.354985	0.814	0.747	4.55778e-05	2	C10orf10
HDHD2	2.6778e-09	0.276916	0.652	0.582	4.70676e-05	2	HDHD2
NRXN11	2.80656e-09	0.297467	0.607	0.422	4.9331e-05	2	NRXN1
CAMK1	2.87914e-09	0.309906	0.336	0.199	5.06067e-05	2	CAMK1
SNHG3	3.02615e-09	0.286155	0.676	0.59	5.31906e-05	2	SNHG3
FIS1	3.03047e-09	0.258544	0.737	0.686	5.32666e-05	2	FIS1
PRRG2	3.26527e-09	0.252788	0.251	0.125	5.73936e-05	2	PRRG2
KCNH61	3.35944e-09	0.252386	0.364	0.2	5.90488e-05	2	KCNH6
FAM83B1	3.82319e-09	0.259938	0.251	0.124	6.72003e-05	2	FAM83B
PTP4A31	4.06244e-09	0.358717	0.571	0.404	7.14056e-05	2	PTP4A3
RGS71	4.41566e-09	0.326167	0.47	0.317	7.7614e-05	2	RGS7
TMEM561	4.83983e-09	0.315153	0.603	0.475	8.50697e-05	2	TMEM56
TNFRSF191	5.07306e-09	0.329807	0.457	0.313	8.91692e-05	2	TNFRSF19
MAP3K4	5.33147e-09	0.293031	0.603	0.496	9.37113e-05	2	MAP3K4
H1F0	5.6743e-09	0.296081	0.733	0.678	9.97372e-05	2	H1F0
REXO1L1	5.7994e-09	0.304428	0.47	0.33	0.000101936	2	REXO1L1
C1orf1681	5.8785e-09	0.278269	0.267	0.133	0.000103326	2	C1orf168
LOC283683	5.91179e-09	0.285025	0.405	0.254	0.000103912	2	LOC283683
TCTN11	5.97195e-09	0.272287	0.717	0.63	0.000104969	2	TCTN1
RABAC1	6.498e-09	0.295529	0.283	0.158	0.000114215	2	RABAC1
WDR60	6.53495e-09	0.309967	0.595	0.478	0.000114865	2	WDR60
ZNF662	6.89197e-09	0.328801	0.453	0.324	0.00012114	2	ZNF662
IGFBP5	6.91702e-09	0.284575	0.518	0.359	0.00012158	2	IGFBP5
RNF157-AS1	7.31635e-09	0.284739	0.291	0.158	0.0001286	2	RNF157-AS1
CORO2B1	7.36183e-09	0.293762	0.291	0.157	0.000129399	2	CORO2B
PHF21B	7.78942e-09	0.26765	0.291	0.151	0.000136915	2	PHF21B
SNTA1	8.29651e-09	0.26325	0.255	0.131	0.000145828	2	SNTA1
DDX3Y	9.03601e-09	0.273464	0.688	0.477	0.000158826	2	DDX3Y
NAT1	9.32522e-09	0.30379	0.336	0.203	0.000163909	2	NAT1
ZNF626	1.0676e-08	0.311687	0.466	0.324	0.000187652	2	ZNF626
FAM46C1	1.07198e-08	0.287013	0.753	0.591	0.000188422	2	FAM46C
TAF8	1.17533e-08	0.30101	0.575	0.464	0.000206589	2	TAF8
PRMT1	1.20472e-08	0.301769	0.421	0.29	0.000211753	2	PRMT1
ESRRG	1.21267e-08	0.345191	0.397	0.259	0.000213152	2	ESRRG
PYGB	1.32648e-08	0.318629	0.401	0.277	0.000233155	2	PYGB
SYT42	1.37157e-08	0.276121	0.794	0.602	0.000241081	2	SYT4
TMEM212	1.47031e-08	0.261499	0.777	0.714	0.000258436	2	TMEM212
PGP	1.56415e-08	0.319291	0.575	0.503	0.00027493	2	PGP
DAPK21	1.85589e-08	0.297597	0.381	0.239	0.000326209	2	DAPK2
KGFLP1	1.87595e-08	0.2838	0.3	0.164	0.000329736	2	KGFLP1
[truncated: 11,864 more rows]

## Sheet: table s3-2 GO-based_FC-DEF
	p_val	avg_log2FC	pct.1	pct.2	p_val_adj	cluster	gene
go-tubulin-binding	1.45758e-71	0.4116	1	1	1.39024e-67	0	go-tubulin-binding
go-regulation-of-microtubule-polymerization-or-depolymerization	2.23854e-68	0.495695	1	0.998	2.13512e-64	0	go-regulation-of-microtubule-polymerization-or-depolymerization
go-axon-cytoplasm	1.37158e-64	0.324333	1	1	1.30821e-60	0	go-axon-cytoplasm
go-microtubule-binding	1.47674e-64	0.431064	1	1	1.40851e-60	0	go-microtubule-binding
go-microtubule-polymerization-or-depolymerization	2.33389e-63	0.481425	1	0.998	2.22607e-59	0	go-microtubule-polymerization-or-depolymerization
go-axonal-transport	2.18079e-62	0.34035	1	1	2.08004e-58	0	go-axonal-transport
go-negative-regulation-of-type-b-pancreatic-cell-apoptotic-process	2.5468e-62	0.667155	0.985	0.901	2.42914e-58	0	go-negative-regulation-of-type-b-pancreatic-cell-apoptotic-process
go-microtubule-cytoskeleton	4.51511e-62	0.259775	1	1	4.30651e-58	0	go-microtubule-cytoskeleton
go-establishment-of-mitochondrion-localization	1.30164e-56	0.578058	1	0.996	1.24151e-52	0	go-establishment-of-mitochondrion-localization
go-regulation-of-microtubule-polymerization	3.0056e-56	0.414954	1	1	2.86674e-52	0	go-regulation-of-microtubule-polymerization
go-inclusion-body	3.6207e-56	0.383628	1	0.998	3.45342e-52	0	go-inclusion-body
go-positive-regulation-of-microtubule-polymerization-or-depolymerization	4.61017e-55	0.441921	1	0.999	4.39718e-51	0	go-positive-regulation-of-microtubule-polymerization-or-depolymerization
go-regulation-of-microtubule-based-process	3.18869e-53	0.300216	1	1	3.04137e-49	0	go-regulation-of-microtubule-based-process
go-microtubule-polymerization	3.01692e-52	0.388764	1	1	2.87754e-48	0	go-microtubule-polymerization
go-neuron-projection-cytoplasm	8.71553e-50	0.263411	1	1	8.31287e-46	0	go-neuron-projection-cytoplasm
go-retrograde-axonal-transport	2.09455e-49	0.622111	1	0.997	1.99778e-45	0	go-retrograde-axonal-transport
go-positive-regulation-of-neuron-differentiation	6.25858e-49	0.369405	1	1	5.96944e-45	0	go-positive-regulation-of-neuron-differentiation
go-ubiquitin-like-protein-transferase-activity	2.31107e-46	0.258335	1	1	2.2043e-42	0	go-ubiquitin-like-protein-transferase-activity
go-axo-dendritic-transport	7.69528e-45	0.270467	1	1	7.33976e-41	0	go-axo-dendritic-transport
go-serine-threonine-protein-kinase-complex	4.34901e-43	0.475115	1	0.992	4.14809e-39	0	go-serine-threonine-protein-kinase-complex
go-heat-shock-protein-binding	8.34797e-43	0.281989	1	1	7.96229e-39	0	go-heat-shock-protein-binding
go-organelle-transport-along-microtubule	2.03616e-42	0.269202	1	1	1.94209e-38	0	go-organelle-transport-along-microtubule
go-regulation-of-membrane-tubulation	2.37418e-42	0.502111	0.951	0.738	2.26449e-38	0	go-regulation-of-membrane-tubulation
go-dendrite-morphogenesis	1.45767e-41	0.343287	1	0.999	1.39033e-37	0	go-dendrite-morphogenesis
go-atpase-regulator-activity	3.45179e-41	0.340261	1	1	3.29232e-37	0	go-atpase-regulator-activity
go-neuron-projection-organization	1.19127e-40	0.382128	1	1	1.13624e-36	0	go-neuron-projection-organization
go-microtubule-cytoskeleton-organization	1.50701e-40	0.253371	1	1	1.43738e-36	0	go-microtubule-cytoskeleton-organization
go-regulation-of-clathrin-dependent-endocytosis	6.15426e-40	0.583098	0.996	0.967	5.86994e-36	0	go-regulation-of-clathrin-dependent-endocytosis
go-microtubule	1.08699e-39	0.256345	1	1	1.03677e-35	0	go-microtubule
go-ego-complex	6.37642e-38	0.33057	0.894	0.625	6.08183e-34	0	go-ego-complex
go-beta-tubulin-binding	3.56637e-37	0.30611	1	1	3.4016e-33	0	go-beta-tubulin-binding
go-cyclin-binding	8.84397e-37	0.628245	0.998	0.972	8.43538e-33	0	go-cyclin-binding
go-positive-regulation-of-neuron-projection-development	1.44715e-36	0.275541	1	1	1.38029e-32	0	go-positive-regulation-of-neuron-projection-development
go-dendrite-development	1.96455e-36	0.277305	1	1	1.87379e-32	0	go-dendrite-development
go-postsynapse-organization	2.50936e-36	0.480569	1	0.997	2.39343e-32	0	go-postsynapse-organization
go-regulation-of-neuron-projection-development	8.53963e-36	0.286843	1	1	8.1451e-32	0	go-regulation-of-neuron-projection-development
go-pcg-protein-complex	1.24765e-35	0.30989	1	0.998	1.19001e-31	0	go-pcg-protein-complex
go-axon-part	8.32376e-35	0.318095	1	1	7.9392e-31	0	go-axon-part
go-microtubule-plus-end-binding	2.09157e-34	0.496265	1	0.989	1.99494e-30	0	go-microtubule-plus-end-binding
go-axon	8.2247e-34	0.330479	1	1	7.84472e-30	0	go-axon
go-regulation-of-neuron-differentiation	8.23324e-34	0.285106	1	1	7.85287e-30	0	go-regulation-of-neuron-differentiation
go-inclusion-body-assembly	1.88462e-33	0.454821	1	0.992	1.79755e-29	0	go-inclusion-body-assembly
go-fat-pad-development	1.52628e-32	0.453883	0.981	0.821	1.45577e-28	0	go-fat-pad-development
go-clathrin-dependent-endocytosis	2.27388e-32	0.319958	1	0.999	2.16882e-28	0	go-clathrin-dependent-endocytosis
go-ubiquitin-like-protein-specific-protease-activity	1.60338e-31	0.426224	1	0.995	1.52931e-27	0	go-ubiquitin-like-protein-specific-protease-activity
go-atpase-activator-activity	1.78278e-31	0.352392	1	0.997	1.70042e-27	0	go-atpase-activator-activity
go-regulation-of-dendrite-development	1.93317e-31	0.310794	1	0.999	1.84386e-27	0	go-regulation-of-dendrite-development
go-plus-end-directed-organelle-transport-along-microtubule	9.6731e-31	0.477066	1	0.973	9.2262e-27	0	go-plus-end-directed-organelle-transport-along-microtubule
go-regulation-of-dendrite-morphogenesis	1.58947e-30	0.464558	1	0.995	1.51603e-26	0	go-regulation-of-dendrite-morphogenesis
go-snare-binding	6.04529e-30	0.333521	1	0.999	5.76599e-26	0	go-snare-binding
go-cullin-ring-ubiquitin-ligase-complex	1.0605e-29	0.274365	1	1	1.01151e-25	0	go-cullin-ring-ubiquitin-ligase-complex
go-vesicle-docking-involved-in-exocytosis	1.72867e-29	0.39313	0.998	0.993	1.6488e-25	0	go-vesicle-docking-involved-in-exocytosis
go-mitochondrion-localization	3.70355e-29	0.441132	1	0.993	3.53244e-25	0	go-mitochondrion-localization
go-sumo-binding	3.71022e-29	0.421798	1	0.984	3.53881e-25	0	go-sumo-binding
go-dendritic-spine-development	6.80804e-29	0.323881	1	1	6.49351e-25	0	go-dendritic-spine-development
go-regulation-of-peptide-hormone-secretion	8.44117e-29	0.390273	1	0.994	8.05119e-25	0	go-regulation-of-peptide-hormone-secretion
go-synaptic-vesicle-membrane	2.49901e-28	0.434268	1	0.944	2.38355e-24	0	go-synaptic-vesicle-membrane
go-multi-organism-cellular-localization	7.47478e-28	0.423599	0.924	0.78	7.12945e-24	0	go-multi-organism-cellular-localization
go-axonal-transport-of-mitochondrion	8.38969e-28	0.53293	0.981	0.825	8.00209e-24	0	go-axonal-transport-of-mitochondrion
go-protein-kinase-complex	1.60491e-27	0.359933	1	0.994	1.53076e-23	0	go-protein-kinase-complex
go-transcription-preinitiation-complex-assembly	2.07733e-27	0.339242	1	0.997	1.98136e-23	0	go-transcription-preinitiation-complex-assembly
go-regulation-of-dendritic-spine-development	2.33559e-27	0.359404	1	0.998	2.22769e-23	0	go-regulation-of-dendritic-spine-development
go-insulin-secretion	5.0117e-27	0.364663	1	0.999	4.78016e-23	0	go-insulin-secretion
go-type-b-pancreatic-cell-apoptotic-process	5.46566e-27	0.565414	0.987	0.932	5.21315e-23	0	go-type-b-pancreatic-cell-apoptotic-process
go-damaged-dna-binding	8.11609e-27	0.385558	1	0.994	7.74112e-23	0	go-damaged-dna-binding
go-negative-regulation-of-endoplasmic-reticulum-stress-induced-intrinsic-apoptotic-signaling-pathway	9.02133e-27	0.324526	1	0.997	8.60455e-23	0	go-negative-regulation-of-endoplasmic-reticulum-stress-induced-intrinsic-apoptotic-signaling-pathway
go-intrinsic-component-of-synaptic-vesicle-membrane	9.78004e-27	0.431828	1	0.918	9.3282e-23	0	go-intrinsic-component-of-synaptic-vesicle-membrane
go-protein-serine-threonine-kinase-inhibitor-activity	1.02922e-26	0.597256	0.998	0.975	9.81668e-23	0	go-protein-serine-threonine-kinase-inhibitor-activity
go-embryonic-retina-morphogenesis-in-camera-type-eye	9.56992e-26	0.417307	0.979	0.868	9.12779e-22	0	go-embryonic-retina-morphogenesis-in-camera-type-eye
go-histone-methyltransferase-complex	1.06046e-25	0.27672	1	0.999	1.01147e-21	0	go-histone-methyltransferase-complex
go-regulation-of-endoplasmic-reticulum-stress-induced-intrinsic-apoptotic-signaling-pathway	7.47552e-25	0.291955	1	0.999	7.13015e-21	0	go-regulation-of-endoplasmic-reticulum-stress-induced-intrinsic-apoptotic-signaling-pathway
go-scf-ubiquitin-ligase-complex	1.15278e-24	0.337767	1	0.995	1.09952e-20	0	go-scf-ubiquitin-ligase-complex
go-cellular-response-to-brain-derived-neurotrophic-factor-stimulus	1.61316e-24	0.442536	0.979	0.83	1.53863e-20	0	go-cellular-response-to-brain-derived-neurotrophic-factor-stimulus
go-cytoplasmic-microtubule-organization	1.63128e-24	0.31575	1	0.998	1.55591e-20	0	go-cytoplasmic-microtubule-organization
go-peptide-hormone-secretion	2.90405e-24	0.352994	1	0.997	2.76988e-20	0	go-peptide-hormone-secretion
go-positive-regulation-of-insulin-secretion	3.90231e-24	0.375848	1	0.993	3.72202e-20	0	go-positive-regulation-of-insulin-secretion
go-cell-cortex-region	1.05265e-23	0.384903	0.998	0.996	1.00401e-19	0	go-cell-cortex-region
go-secretory-granule-localization	2.8801e-23	0.490632	0.998	0.969	2.74704e-19	0	go-secretory-granule-localization
go-positive-regulation-of-axonogenesis	3.93245e-23	0.394683	1	0.993	3.75077e-19	0	go-positive-regulation-of-axonogenesis
go-exocytic-process	6.22036e-23	0.404888	1	0.992	5.93298e-19	0	go-exocytic-process
go-regulation-of-insulin-secretion	7.32455e-23	0.344872	1	0.998	6.98615e-19	0	go-regulation-of-insulin-secretion
go-dendritic-spine-morphogenesis	8.28652e-23	0.445521	1	0.99	7.90368e-19	0	go-dendritic-spine-morphogenesis
go-microtubule-plus-end	1.04487e-22	0.514416	1	0.978	9.96598e-19	0	go-microtubule-plus-end
go-microtubule-nucleation	1.32182e-22	0.334201	1	0.997	1.26075e-18	0	go-microtubule-nucleation
go-syntaxin-binding	1.91389e-22	0.298627	1	0.999	1.82547e-18	0	go-syntaxin-binding
go-localization-within-membrane	3.19676e-22	0.328025	1	1	3.04907e-18	0	go-localization-within-membrane
go-regulation-of-er-associated-ubiquitin-dependent-protein-catabolic-process	3.20843e-22	0.350535	0.996	0.962	3.0602e-18	0	go-regulation-of-er-associated-ubiquitin-dependent-protein-catabolic-process
go-dna-binding-transcription-factor-activity	9.31159e-22	0.454525	0.947	0.763	8.8814e-18	0	go-dna-binding-transcription-factor-activity
go-early-phagosome	1.13411e-21	0.415715	1	0.976	1.08171e-17	0	go-early-phagosome
go-protein-depolymerization	1.34695e-21	0.319573	1	0.998	1.28472e-17	0	go-protein-depolymerization
go-regulation-of-tubulin-deacetylation	2.2677e-21	0.451641	0.989	0.909	2.16294e-17	0	go-regulation-of-tubulin-deacetylation
go-phosphoric-ester-hydrolase-activity	2.42388e-21	0.307679	0.998	0.999	2.3119e-17	0	go-phosphoric-ester-hydrolase-activity
go-c3hc4-type-ring-finger-domain-binding	3.22961e-21	0.314757	0.994	0.934	3.0804e-17	0	go-c3hc4-type-ring-finger-domain-binding
go-snare-complex	3.51056e-21	0.259628	1	0.998	3.34837e-17	0	go-snare-complex
go-endocrine-pancreas-development	3.57366e-21	0.455231	1	0.986	3.40856e-17	0	go-endocrine-pancreas-development
go-kinase-inhibitor-activity	5.00347e-21	0.365913	1	0.996	4.77231e-17	0	go-kinase-inhibitor-activity
go-vesicle-docking	6.26417e-21	0.253559	1	0.999	5.97477e-17	0	go-vesicle-docking
go-extrinsic-component-of-synaptic-membrane	1.0562e-20	0.511169	0.979	0.884	1.0074e-16	0	go-extrinsic-component-of-synaptic-membrane
go-regulation-by-virus-of-viral-protein-levels-in-host-cell	1.36941e-20	0.347377	0.987	0.903	1.30614e-16	0	go-regulation-by-virus-of-viral-protein-levels-in-host-cell
go-rna-polymerase-ii-preinitiation-complex-assembly	1.38154e-20	0.347382	1	0.992	1.31771e-16	0	go-rna-polymerase-ii-preinitiation-complex-assembly
go-distal-axon	1.61983e-20	0.279223	1	0.999	1.54499e-16	0	go-distal-axon
go-protein-localization-to-cytoskeleton	1.78982e-20	0.371926	1	0.993	1.70713e-16	0	go-protein-localization-to-cytoskeleton
go-regulation-of-telomere-capping	1.92748e-20	0.432866	1	0.984	1.83843e-16	0	go-regulation-of-telomere-capping
go-signal-release	4.16991e-20	0.366348	1	0.998	3.97726e-16	0	go-signal-release
go-regulation-of-nervous-system-development	5.41464e-20	0.253701	1	0.999	5.16448e-16	0	go-regulation-of-nervous-system-development
go-regulation-of-dendritic-spine-morphogenesis	6.01467e-20	0.398781	0.998	0.989	5.73679e-16	0	go-regulation-of-dendritic-spine-morphogenesis
go-intra-golgi-vesicle-mediated-transport	2.32482e-19	0.26267	1	0.998	2.21742e-15	0	go-intra-golgi-vesicle-mediated-transport
go-spindle-localization	2.72452e-19	0.282613	1	0.999	2.59865e-15	0	go-spindle-localization
go-dynactin-binding	3.10571e-19	0.510531	0.994	0.935	2.96222e-15	0	go-dynactin-binding
go-exocytic-vesicle	5.70873e-19	0.359215	1	1	5.44498e-15	0	go-exocytic-vesicle
go-general-transcription-initiation-factor-binding	6.88095e-19	0.281961	1	0.998	6.56305e-15	0	go-general-transcription-initiation-factor-binding
go-regulation-of-hormone-secretion	7.81631e-19	0.316139	1	0.981	7.45519e-15	0	go-regulation-of-hormone-secretion
go-hormone-transport	8.09657e-19	0.299484	1	0.996	7.72251e-15	0	go-hormone-transport
go-adp-binding	8.43706e-19	0.476546	1	0.999	8.04727e-15	0	go-adp-binding
go-regulation-of-axonogenesis	1.24988e-18	0.44265	0.998	0.975	1.19214e-14	0	go-regulation-of-axonogenesis
go-structural-constituent-of-synapse	1.2995e-18	0.432672	1	0.983	1.23946e-14	0	go-structural-constituent-of-synapse
go-rna-polymerase-ii-activating-transcription-factor-binding	2.2297e-18	0.254516	1	0.999	2.12669e-14	0	go-rna-polymerase-ii-activating-transcription-factor-binding
go-axo-dendritic-protein-transport	2.57642e-18	0.322603	1	0.998	2.45739e-14	0	go-axo-dendritic-protein-transport
go-nuclear-migration	3.06008e-18	0.315739	1	0.996	2.9187e-14	0	go-nuclear-migration
go-guanyl-nucleotide-exchange-factor-activity	4.66327e-18	0.388187	0.998	0.983	4.44783e-14	0	go-guanyl-nucleotide-exchange-factor-activity
go-enteroendocrine-cell-differentiation	9.85748e-18	0.362706	1	0.973	9.40206e-14	0	go-enteroendocrine-cell-differentiation
go-translation-repressor-activity	1.0578e-17	0.344933	1	0.996	1.00893e-13	0	go-translation-repressor-activity
go-tubulin-deacetylation	1.3255e-17	0.429718	0.994	0.931	1.26426e-13	0	go-tubulin-deacetylation
go-response-to-leucine	4.42632e-17	0.420686	0.998	0.948	4.22182e-13	0	go-response-to-leucine
go-protein-destabilization	5.71112e-17	0.348465	1	0.987	5.44727e-13	0	go-protein-destabilization
go-integral-component-of-synaptic-vesicle-membrane	6.04837e-17	0.382344	0.996	0.81	5.76894e-13	0	go-integral-component-of-synaptic-vesicle-membrane
go-tethering-complex	8.44412e-17	0.25829	1	0.999	8.054e-13	0	go-tethering-complex
go-tbp-class-protein-binding	1.01042e-16	0.378216	0.998	0.978	9.63736e-13	0	go-tbp-class-protein-binding
go-dendritic-tree	1.20814e-16	0.251788	1	1	1.15232e-12	0	go-dendritic-tree
go-cyclin-dependent-protein-serine-threonine-kinase-inhibitor-activity	1.21657e-16	0.281145	0.921	0.733	1.16036e-12	0	go-cyclin-dependent-protein-serine-threonine-kinase-inhibitor-activity
go-negative-regulation-of-histone-modification	1.88572e-16	0.255258	1	0.998	1.7986e-12	0	go-negative-regulation-of-histone-modification
go-synapse-organization	2.82008e-16	0.361791	0.992	0.948	2.6898e-12	0	go-synapse-organization
go-synaptic-vesicle-priming	3.34369e-16	0.361792	0.996	0.894	3.18921e-12	0	go-synaptic-vesicle-priming
go-proton-exporting-atpase-activity	3.40344e-16	0.263064	1	0.999	3.2462e-12	0	go-proton-exporting-atpase-activity
go-positive-regulation-of-dendrite-development	3.50805e-16	0.264194	1	0.999	3.34598e-12	0	go-positive-regulation-of-dendrite-development
go-regulation-of-trans-synaptic-signaling	4.16499e-16	0.277036	1	0.741	3.97257e-12	0	go-regulation-of-trans-synaptic-signaling
go-positive-regulation-of-dendritic-spine-development	6.08658e-16	0.384963	0.996	0.992	5.80538e-12	0	go-positive-regulation-of-dendritic-spine-development
go-regulation-of-rna-polymerase-ii-transcriptional-preinitiation-complex-assembly	7.65419e-16	0.360613	0.996	0.978	7.30057e-12	0	go-regulation-of-rna-polymerase-ii-transcriptional-preinitiation-complex-assembly
go-nuclear-localization-sequence-binding	9.47905e-16	0.320324	0.998	0.991	9.04112e-12	0	go-nuclear-localization-sequence-binding
go-cytoplasmic-microtubule	1.5373e-15	0.275278	1	0.999	1.46627e-11	0	go-cytoplasmic-microtubule
go-presynaptic-active-zone	2.81726e-15	0.262909	1	0.804	2.6871e-11	0	go-presynaptic-active-zone
go-regulation-of-microtubule-nucleation	4.19134e-15	0.283091	0.932	0.797	3.9977e-11	0	go-regulation-of-microtubule-nucleation
go-ligase-activity	4.39969e-15	0.26754	1	0.996	4.19643e-11	0	go-ligase-activity
go-regulation-of-protein-depolymerization	4.87342e-15	0.31856	1	0.999	4.64827e-11	0	go-regulation-of-protein-depolymerization
go-clathrin-binding	2.54153e-14	0.313108	1	0.982	2.42411e-10	0	go-clathrin-binding
go-sequence-specific-single-stranded-dna-binding	3.76228e-14	0.256722	1	1	3.58846e-10	0	go-sequence-specific-single-stranded-dna-binding
go-adiponectin-activated-signaling-pathway	3.95487e-14	0.30565	0.983	0.902	3.77215e-10	0	go-adiponectin-activated-signaling-pathway
go-neuron-to-neuron-synapse	4.24904e-14	0.253694	1	0.999	4.05274e-10	0	go-neuron-to-neuron-synapse
go-ran-gtpase-binding	5.34557e-14	0.333519	1	0.992	5.0986e-10	0	go-ran-gtpase-binding
go-nuclear-ubiquitin-ligase-complex	8.00784e-14	0.360482	0.996	0.989	7.63787e-10	0	go-nuclear-ubiquitin-ligase-complex
go-regulation-of-synaptic-vesicle-cycle	1.24768e-13	0.315565	1	0.905	1.19004e-09	0	go-regulation-of-synaptic-vesicle-cycle
go-1-phosphatidylinositol-binding	1.28905e-13	0.394232	0.983	0.915	1.2295e-09	0	go-1-phosphatidylinositol-binding
go-calcium-ion-regulated-exocytosis	1.77683e-13	0.295976	1	0.919	1.69474e-09	0	go-calcium-ion-regulated-exocytosis
go-syntaxin-1-binding	1.97089e-13	0.261051	1	0.933	1.87983e-09	0	go-syntaxin-1-binding
go-protein-retention-in-golgi-apparatus	3.74257e-13	0.252432	0.968	0.892	3.56967e-09	0	go-protein-retention-in-golgi-apparatus
go-dense-core-granule-transport	6.86717e-13	0.339075	0.998	0.944	6.5499e-09	0	go-dense-core-granule-transport
go-positive-regulation-of-tor-signaling	8.50854e-13	0.392296	1	0.981	8.11545e-09	0	go-positive-regulation-of-tor-signaling
go-positive-regulation-of-dendrite-morphogenesis	8.66873e-13	0.309735	1	0.986	8.26824e-09	0	go-positive-regulation-of-dendrite-morphogenesis
go-membrane-fission	9.92532e-13	0.395683	0.987	0.926	9.46677e-09	0	go-membrane-fission
go-positive-regulation-of-rna-polymerase-ii-transcriptional-preinitiation-complex-assembly	1.76516e-12	0.364186	0.983	0.906	1.68361e-08	0	go-positive-regulation-of-rna-polymerase-ii-transcriptional-preinitiation-complex-assembly
go-signal-release-from-synapse	1.85884e-12	0.25399	1	0.769	1.77296e-08	0	go-signal-release-from-synapse
go-protein-demethylation	2.05064e-12	0.448457	0.985	0.957	1.9559e-08	0	go-protein-demethylation
go-er-overload-response	3.19476e-12	0.40494	0.998	0.973	3.04717e-08	0	go-er-overload-response
go-presynaptic-endocytosis	6.68626e-12	0.267033	1	0.995	6.37735e-08	0	go-presynaptic-endocytosis
go-synaptic-vesicle-exocytosis	7.58537e-12	0.270306	1	0.88	7.23492e-08	0	go-synaptic-vesicle-exocytosis
go-positive-regulation-of-neuron-death	1.06886e-11	0.294181	1	0.999	1.01948e-07	0	go-positive-regulation-of-neuron-death
go-pancreas-development	1.14178e-11	0.33355	1	0.981	1.08903e-07	0	go-pancreas-development
go-negative-regulation-of-histone-methylation	1.44745e-11	0.408287	0.985	0.949	1.38058e-07	0	go-negative-regulation-of-histone-methylation
go-synaptic-vesicle-cycle	1.63762e-11	0.337564	1	0.99	1.56196e-07	0	go-synaptic-vesicle-cycle
go-chromosome-localization	1.68524e-11	0.395229	1	0.99	1.60738e-07	0	go-chromosome-localization
go-regulation-of-cytoplasmic-translation	2.13243e-11	0.418174	0.998	0.986	2.03391e-07	0	go-regulation-of-cytoplasmic-translation
go-axonal-growth-cone	2.16752e-11	0.333636	0.998	0.995	2.06738e-07	0	go-axonal-growth-cone
go-regulation-of-er-to-golgi-vesicle-mediated-transport	3.76437e-11	0.287746	1	0.99	3.59046e-07	0	go-regulation-of-er-to-golgi-vesicle-mediated-transport
go-synaptic-vesicle-budding	5.32289e-11	0.308739	0.994	0.936	5.07697e-07	0	go-synaptic-vesicle-budding
go-g-rich-strand-telomeric-dna-binding	7.5171e-11	0.308187	1	0.987	7.16981e-07	0	go-g-rich-strand-telomeric-dna-binding
go-anterograde-axonal-protein-transport	1.93625e-10	0.263348	0.989	0.88	1.8468e-06	0	go-anterograde-axonal-protein-transport
go-regulation-of-synaptic-vesicle-recycling	2.09758e-10	0.250144	1	0.984	2.00067e-06	0	go-regulation-of-synaptic-vesicle-recycling
go-l-ascorbic-acid-metabolic-process	2.48548e-10	0.306169	0.968	0.892	2.37065e-06	0	go-l-ascorbic-acid-metabolic-process
go-alpha-tubulin-binding	3.48592e-10	0.29662	0.998	0.979	3.32487e-06	0	go-alpha-tubulin-binding
go-negative-regulation-of-neurotransmitter-secretion	4.71331e-10	0.311651	0.998	0.969	4.49556e-06	0	go-negative-regulation-of-neurotransmitter-secretion
go-positive-regulation-of-dendritic-spine-morphogenesis	1.05066e-09	0.300685	0.998	0.988	1.00212e-05	0	go-positive-regulation-of-dendritic-spine-morphogenesis
go-maintenance-of-synapse-structure	1.29304e-09	0.366898	0.987	0.932	1.2333e-05	0	go-maintenance-of-synapse-structure
go-protein-localization-to-synapse	1.35253e-09	0.309819	0.994	0.88	1.29004e-05	0	go-protein-localization-to-synapse
go-nucleus-localization	1.95131e-09	0.292387	1	0.993	1.86116e-05	0	go-nucleus-localization
go-nuclear-envelope-lumen	3.29721e-09	0.359504	0.998	0.953	3.14487e-05	0	go-nuclear-envelope-lumen
go-protein-localization-to-presynapse	4.19992e-09	0.298349	0.998	0.896	4.00588e-05	0	go-protein-localization-to-presynapse
go-protein-transport-within-lipid-bilayer	1.04666e-08	0.278607	0.998	0.98	9.983e-05	0	go-protein-transport-within-lipid-bilayer
go-3-hydroxyacyl-coa-dehydrogenase-activity	1.11271e-08	0.265474	0.994	0.958	0.000106131	0	go-3-hydroxyacyl-coa-dehydrogenase-activity
go-neuron-projection-maintenance	1.25421e-08	0.293861	0.996	0.955	0.000119627	0	go-neuron-projection-maintenance
go-nucleoside-monophosphate-biosynthetic-process	1.47718e-08	0.325598	0.992	0.956	0.000140893	0	go-nucleoside-monophosphate-biosynthetic-process
go-cell-aging	3.82275e-08	0.268291	1	0.994	0.000364614	0	go-cell-aging
go-regulation-of-microtubule-binding	3.94498e-08	0.295857	1	0.964	0.000376272	0	go-regulation-of-microtubule-binding
go-vesicle-mediated-transport-in-synapse	4.13708e-08	0.253647	1	1	0.000394594	0	go-vesicle-mediated-transport-in-synapse
go-hops-complex	4.96561e-08	0.278417	0.992	0.968	0.00047362	0	go-hops-complex
go-positive-regulation-of-peptide-hormone-secretion	5.65178e-08	0.324037	0.998	0.966	0.000539067	0	go-positive-regulation-of-peptide-hormone-secretion
go-pallium-development	7.41338e-08	0.30339	0.998	0.994	0.000707088	0	go-pallium-development
go-nucleocytoplasmic-carrier-activity	1.02426e-07	0.274793	0.998	0.987	0.000976936	0	go-nucleocytoplasmic-carrier-activity
go-actin-filament-based-transport	1.07936e-07	0.260388	0.972	0.902	0.0010295	0	go-actin-filament-based-transport
go-regulation-of-endoplasmic-reticulum-unfolded-protein-response	1.34469e-07	0.337705	1	0.979	0.00128256	0	go-regulation-of-endoplasmic-reticulum-unfolded-protein-response
go-microtubule-end	1.49195e-07	0.382461	1	0.965	0.00142302	0	go-microtubule-end
go-protein-k63-linked-ubiquitination	1.51249e-07	0.291389	0.998	0.988	0.00144262	0	go-protein-k63-linked-ubiquitination
go-protein-deneddylation	1.54625e-07	0.270503	0.989	0.926	0.00147481	0	go-protein-deneddylation
go-cyclin-dependent-protein-serine-threonine-kinase-regulator-activity	1.5953e-07	0.397981	0.981	0.925	0.00152159	0	go-cyclin-dependent-protein-serine-threonine-kinase-regulator-activity
go-protein-localization-to-microtubule	1.64033e-07	0.352335	0.996	0.935	0.00156454	0	go-protein-localization-to-microtubule
go-polyubiquitin-modification-dependent-protein-binding	1.85383e-07	0.262454	1	0.993	0.00176819	0	go-polyubiquitin-modification-dependent-protein-binding
go-sumo-transferase-activity	1.85549e-07	0.284396	1	0.984	0.00176977	0	go-sumo-transferase-activity
go-ral-gtpase-binding	2.20571e-07	0.283359	0.994	0.967	0.00210381	0	go-ral-gtpase-binding
go-negative-regulation-of-endoplasmic-reticulum-unfolded-protein-response	2.25133e-07	0.304206	0.987	0.904	0.00214732	0	go-negative-regulation-of-endoplasmic-reticulum-unfolded-protein-response
go-purine-nucleobase-metabolic-process	2.57919e-07	0.275239	0.936	0.851	0.00246004	0	go-purine-nucleobase-metabolic-process
go-esc-e-z-complex	2.67098e-07	0.301213	0.996	0.958	0.00254758	0	go-esc-e-z-complex
go-gamma-tubulin-binding	3.54083e-07	0.27212	0.932	0.825	0.00337724	0	go-gamma-tubulin-binding
go-receptor-localization-to-synapse	4.95616e-07	0.286692	0.994	0.934	0.00472719	0	go-receptor-localization-to-synapse
go-negative-regulation-of-calcium-ion-dependent-exocytosis	6.35812e-07	0.365368	0.994	0.951	0.00606438	0	go-negative-regulation-of-calcium-ion-dependent-exocytosis
go-n-terminal-protein-amino-acid-modification	6.58302e-07	0.310946	0.998	0.977	0.00627889	0	go-n-terminal-protein-amino-acid-modification
go-regulation-of-rac-protein-signal-transduction	9.01981e-07	0.256703	0.987	0.966	0.0086031	0	go-regulation-of-rac-protein-signal-transduction
go-presynapse	1.0159e-06	0.279519	1	0.984	0.00968964	0	go-presynapse
go-establishment-of-protein-localization-to-postsynaptic-membrane	1.33276e-06	0.299862	0.996	0.953	0.0127119	0	go-establishment-of-protein-localization-to-postsynaptic-membrane
go-histone-h2a-monoubiquitination	1.60376e-06	0.32224	0.998	0.978	0.0152967	0	go-histone-h2a-monoubiquitination
go-negative-regulation-of-microtubule-polymerization-or-depolymerization	2.37853e-06	0.291957	1	0.961	0.0226864	0	go-negative-regulation-of-microtubule-polymerization-or-depolymerization
go-torc1-signaling	3.45439e-06	0.312886	0.998	0.967	0.032948	0	go-torc1-signaling
go-synaptic-vesicle-localization	4.16747e-06	0.276641	1	0.99	0.0397493	0	go-synaptic-vesicle-localization
go-cytoskeletal-adaptor-activity	6.71841e-06	0.300404	0.985	0.931	0.0640802	0	go-cytoskeletal-adaptor-activity
go-glial-cell-projection	1.14264e-05	0.264397	0.994	0.986	0.108985	0	go-glial-cell-projection
go-prc1-complex	1.75923e-05	0.292372	0.964	0.88	0.167795	0	go-prc1-complex
go-transcription-corepressor-binding	1.88874e-05	0.340591	0.989	0.953	0.180148	0	go-transcription-corepressor-binding
go-ribonucleoside-monophosphate-biosynthetic-process	1.91663e-05	0.283194	0.987	0.94	0.182808	0	go-ribonucleoside-monophosphate-biosynthetic-process
go-dna-replication-factor-a-complex	2.24906e-05	0.29521	0.994	0.938	0.214515	0	go-dna-replication-factor-a-complex
go-regulation-of-mrna-polyadenylation	2.60429e-05	0.284743	0.989	0.938	0.248397	0	go-regulation-of-mrna-polyadenylation
go-demethylase-activity	3.6793e-05	0.342275	0.977	0.941	0.350931	0	go-demethylase-activity
go-pericentriolar-material	3.81423e-05	0.269667	0.996	0.976	0.363802	0	go-pericentriolar-material
go-lamin-binding	0.000134032	0.284556	0.981	0.94	1	0	go-lamin-binding
go-general-transcription-initiation-factor-activity	0.000179489	0.303282	0.994	0.96	1	0	go-general-transcription-initiation-factor-activity
go-purine-nucleoside-monophosphate-metabolic-process	0.000260783	0.263478	0.987	0.965	1	0	go-purine-nucleoside-monophosphate-metabolic-process
go-purine-nucleoside-metabolic-process	0.000267515	0.257639	0.998	0.979	1	0	go-purine-nucleoside-metabolic-process
go-phosphatidylinositol-bisphosphate-phosphatase-activity	0.000273178	0.252221	0.983	0.924	1	0	go-phosphatidylinositol-bisphosphate-phosphatase-activity
go-positive-regulation-of-transcription-initiation-from-rna-polymerase-ii-promoter	0.000336052	0.264345	0.998	0.981	1	0	go-positive-regulation-of-transcription-initiation-from-rna-polymerase-ii-promoter
go-gtp-metabolic-process	0.000403578	0.290474	0.998	0.977	1	0	go-gtp-metabolic-process
go-nucleoside-monophosphate-metabolic-process	0.000684111	0.257307	0.992	0.963	1	0	go-nucleoside-monophosphate-metabolic-process
go-ubiquitin-ubiquitin-ligase-activity	0.000856337	0.252254	0.989	0.958	1	0	go-ubiquitin-ubiquitin-ligase-activity
go-regulation-of-receptor-internalization	0.00104626	0.270117	0.998	0.981	1	0	go-regulation-of-receptor-internalization
go-translation-repressor-activity-mrna-regulatory-element-binding	0.0015934	0.276869	0.996	0.95	1	0	go-translation-repressor-activity-mrna-regulatory-element-binding
go-negative-regulation-of-protein-oligomerization	0.00252645	0.259525	1	0.967	1	0	go-negative-regulation-of-protein-oligomerization
go-histone-demethylase-activity	0.00395593	0.274926	0.945	0.9	1	0	go-histone-demethylase-activity
go-adipose-tissue-development	0.00434867	0.264992	0.992	0.938	1	0	go-adipose-tissue-development
go-cerebral-cortex-development	0.00539651	0.281051	0.996	0.975	1	0	go-cerebral-cortex-development
go-regulation-of-tau-protein-kinase-activity	1.42066e-165	0.763907	1	0.987	1.35503e-161	1	go-regulation-of-tau-protein-kinase-activity
go-cotranslational-protein-targeting-to-membrane	2.62841e-162	0.721981	1	1	2.50698e-158	1	go-cotranslational-protein-targeting-to-membrane
go-positive-regulation-of-tau-protein-kinase-activity	1.86469e-160	0.765859	0.997	0.994	1.77854e-156	1	go-positive-regulation-of-tau-protein-kinase-activity
go-regulation-of-camp-mediated-signaling	1.39614e-159	0.375269	0.995	0.879	1.33164e-155	1	go-regulation-of-camp-mediated-signaling
go-establishment-of-protein-localization-to-endoplasmic-reticulum	4.27877e-159	0.676609	1	1	4.08109e-155	1	go-establishment-of-protein-localization-to-endoplasmic-reticulum
go-multicellular-organismal-signaling	3.05915e-156	0.287766	0.956	0.564	2.91782e-152	1	go-multicellular-organismal-signaling
go-positive-regulation-of-intrinsic-apoptotic-signaling-pathway-by-p53-class-mediator	3.17164e-156	0.980829	0.997	0.999	3.02511e-152	1	go-positive-regulation-of-intrinsic-apoptotic-signaling-pathway-by-p53-class-mediator
go-neuron-projection-terminus	1.12697e-155	0.292542	0.966	0.649	1.07491e-151	1	go-neuron-projection-terminus
go-heart-process	2.86758e-155	0.294134	0.953	0.599	2.7351e-151	1	go-heart-process
go-ubiquitin-ligase-inhibitor-activity	5.32551e-155	0.960228	1	0.999	5.07947e-151	1	go-ubiquitin-ligase-inhibitor-activity
go-ion-transport	4.73141e-154	0.422491	0.961	0.613	4.51281e-150	1	go-ion-transport
go-response-to-corticosterone	7.40863e-154	0.252322	0.982	0.922	7.06635e-150	1	go-response-to-corticosterone
go-protein-targeting-to-membrane	1.12385e-152	0.654095	1	1	1.07193e-148	1	go-protein-targeting-to-membrane
go-nuclear-transcribed-mrna-catabolic-process-nonsense-mediated-decay	1.16251e-152	0.58211	1	1	1.1088e-148	1	go-nuclear-transcribed-mrna-catabolic-process-nonsense-mediated-decay
go-inorganic-ion-transmembrane-transport	3.06473e-152	0.328114	0.961	0.602	2.92314e-148	1	go-inorganic-ion-transmembrane-transport
go-cytosolic-ribosome	6.38491e-152	0.659422	1	1	6.08993e-148	1	go-cytosolic-ribosome
go-relaxation-of-muscle	2.07432e-150	0.421621	0.987	0.855	1.97848e-146	1	go-relaxation-of-muscle
go-protein-localization-to-endoplasmic-reticulum	7.70494e-150	0.613418	1	1	7.34897e-146	1	go-protein-localization-to-endoplasmic-reticulum
go-cardiac-conduction	9.99738e-150	0.576805	0.992	0.729	9.5355e-146	1	go-cardiac-conduction
go-lipoprotein-particle-receptor-binding	3.29781e-149	0.268984	0.987	0.982	3.14545e-145	1	go-lipoprotein-particle-receptor-binding
go-metal-ion-transport	1.44333e-148	0.604447	0.979	0.697	1.37665e-144	1	go-metal-ion-transport
go-cytosolic-large-ribosomal-subunit	2.43647e-148	0.656339	1	1	2.3239e-144	1	go-cytosolic-large-ribosomal-subunit
go-establishment-of-protein-localization-to-membrane	2.05486e-147	0.534003	1	1	1.95992e-143	1	go-establishment-of-protein-localization-to-membrane
go-regulation-of-heart-rate	6.642e-147	0.32467	0.969	0.684	6.33514e-143	1	go-regulation-of-heart-rate
go-cation-transport	2.45487e-146	0.832863	0.987	0.693	2.34145e-142	1	go-cation-transport
go-positive-regulation-of-transporter-activity	3.42729e-146	0.518556	0.987	0.899	3.26895e-142	1	go-positive-regulation-of-transporter-activity
go-developmental-maturation	8.76059e-145	0.358956	0.977	0.888	8.35585e-141	1	go-developmental-maturation
go-presynaptic-membrane	2.69779e-143	0.413496	0.953	0.614	2.57315e-139	1	go-presynaptic-membrane
go-adult-locomotory-behavior	4.79365e-143	0.653861	0.997	0.917	4.57218e-139	1	go-adult-locomotory-behavior
go-positive-regulation-of-neurotransmitter-transport	6.48807e-143	0.325233	0.966	0.707	6.18832e-139	1	go-positive-regulation-of-neurotransmitter-transport
go-regulation-of-cardiac-muscle-contraction	2.71047e-142	0.263865	0.979	0.957	2.58525e-138	1	go-regulation-of-cardiac-muscle-contraction
go-ion-transmembrane-transport	4.61425e-142	0.352031	0.956	0.68	4.40108e-138	1	go-ion-transmembrane-transport
go-cation-transmembrane-transport	6.28152e-142	0.513793	0.974	0.674	5.99131e-138	1	go-cation-transmembrane-transport
go-regulation-of-transmembrane-transport	1.76237e-141	0.33523	0.943	0.66	1.68095e-137	1	go-regulation-of-transmembrane-transport
go-nuclear-transcribed-mrna-catabolic-process	4.66307e-140	0.483048	1	1	4.44763e-136	1	go-nuclear-transcribed-mrna-catabolic-process
go-regulation-of-metal-ion-transport	9.22506e-140	0.294181	0.933	0.626	8.79886e-136	1	go-regulation-of-metal-ion-transport
go-synaptic-signaling	9.66752e-139	0.930108	0.987	0.655	9.22088e-135	1	go-synaptic-signaling
go-regulation-of-cation-transmembrane-transport	2.14947e-138	0.365814	0.946	0.687	2.05016e-134	1	go-regulation-of-cation-transmembrane-transport
go-neural-precursor-cell-proliferation	3.42988e-138	0.468727	0.982	0.959	3.27142e-134	1	go-neural-precursor-cell-proliferation
go-cytosolic-small-ribosomal-subunit	7.96877e-138	0.634716	1	1	7.60061e-134	1	go-cytosolic-small-ribosomal-subunit
go-polysomal-ribosome	1.08357e-137	0.594174	1	1	1.03351e-133	1	go-polysomal-ribosome
go-translational-initiation	1.67874e-137	0.47233	1	1	1.60118e-133	1	go-translational-initiation
go-monovalent-inorganic-cation-transport	1.72352e-137	0.77958	0.99	0.708	1.6439e-133	1	go-monovalent-inorganic-cation-transport
go-positive-regulation-of-calcium-ion-dependent-exocytosis	5.24494e-137	0.299542	0.959	0.675	5.00262e-133	1	go-positive-regulation-of-calcium-ion-dependent-exocytosis
go-regulation-of-long-term-synaptic-potentiation	2.21723e-136	0.332326	0.982	0.897	2.11479e-132	1	go-regulation-of-long-term-synaptic-potentiation
go-atp-hydrolysis-coupled-cation-transmembrane-transport	3.77526e-136	0.290629	1	0.957	3.60085e-132	1	go-atp-hydrolysis-coupled-cation-transmembrane-transport
go-cellular-ion-homeostasis	4.62938e-136	0.50552	0.972	0.84	4.4155e-132	1	go-cellular-ion-homeostasis
go-cardiac-muscle-cell-action-potential	2.23868e-135	0.365035	0.956	0.817	2.13526e-131	1	go-cardiac-muscle-cell-action-potential
go-synapse	2.50847e-135	0.761291	1	1	2.39258e-131	1	go-synapse
go-positive-regulation-of-ion-transmembrane-transport	2.64784e-135	0.321829	0.938	0.786	2.52551e-131	1	go-positive-regulation-of-ion-transmembrane-transport
go-regulation-of-cardiac-muscle-contraction-by-calcium-ion-signaling	3.12569e-135	0.251022	0.982	0.941	2.98128e-131	1	go-regulation-of-cardiac-muscle-contraction-by-calcium-ion-signaling
go-mrna-binding	6.36874e-135	0.928562	1	0.903	6.0745e-131	1	go-mrna-binding
go-cytosolic-part	1.93772e-134	0.5267	1	1	1.8482e-130	1	go-cytosolic-part
go-learning	2.25053e-134	0.465382	0.984	0.886	2.14656e-130	1	go-learning
go-ubiquitin-protein-transferase-inhibitor-activity	2.30171e-134	1.03939	1	0.999	2.19537e-130	1	go-ubiquitin-protein-transferase-inhibitor-activity
go-large-ribosomal-subunit-rrna-binding	2.5689e-134	1.0734	0.997	0.999	2.45021e-130	1	go-large-ribosomal-subunit-rrna-binding
go-positive-regulation-of-synaptic-transmission	3.1047e-134	0.692873	0.992	0.683	2.96127e-130	1	go-positive-regulation-of-synaptic-transmission
go-atpase-activity-coupled-to-transmembrane-movement-of-ions-phosphorylative-mechanism	3.53413e-134	0.478509	0.997	0.99	3.37086e-130	1	go-atpase-activity-coupled-to-transmembrane-movement-of-ions-phosphorylative-mechanism
go-viral-gene-expression	4.14933e-133	0.461437	1	1	3.95763e-129	1	go-viral-gene-expression
go-positive-regulation-of-regulated-secretory-pathway	7.60342e-133	0.26447	0.948	0.829	7.25215e-129	1	go-positive-regulation-of-regulated-secretory-pathway
go-regulation-of-transporter-activity	1.52294e-132	0.405216	0.974	0.82	1.45258e-128	1	go-regulation-of-transporter-activity
go-plasma-membrane-region	5.02061e-132	0.348785	0.943	0.662	4.78866e-128	1	go-plasma-membrane-region
go-protein-localization-to-membrane	6.50695e-132	0.418728	1	1	6.20633e-128	1	go-protein-localization-to-membrane
go-regulation-of-heart-rate-by-cardiac-conduction	8.34604e-132	0.352292	0.966	0.745	7.96045e-128	1	go-regulation-of-heart-rate-by-cardiac-conduction
go-cognition	4.61448e-131	0.397874	0.982	0.862	4.40129e-127	1	go-cognition
go-spectrin-binding	1.27398e-130	0.346215	0.964	0.948	1.21513e-126	1	go-spectrin-binding
go-cell-cell-signaling	5.40307e-130	0.883573	1	0.994	5.15345e-126	1	go-cell-cell-signaling
go-long-term-synaptic-potentiation	8.3444e-130	0.586098	0.982	0.771	7.95889e-126	1	go-long-term-synaptic-potentiation
go-ion-homeostasis	1.25252e-129	0.68502	0.987	0.913	1.19466e-125	1	go-ion-homeostasis
go-negative-regulation-of-execution-phase-of-apoptosis	1.93447e-129	0.301495	0.982	0.983	1.8451e-125	1	go-negative-regulation-of-execution-phase-of-apoptosis
go-cellular-response-to-calcium-ion	7.99483e-128	0.47654	0.984	0.949	7.62547e-124	1	go-cellular-response-to-calcium-ion
go-cell-communication-by-electrical-coupling	4.23597e-127	0.331742	0.979	0.962	4.04027e-123	1	go-cell-communication-by-electrical-coupling
go-cellular-component-assembly-involved-in-morphogenesis	4.6845e-127	0.346841	0.966	0.94	4.46807e-123	1	go-cellular-component-assembly-involved-in-morphogenesis
go-microtubule-motor-activity	1.62537e-126	0.291822	0.987	0.864	1.55028e-122	1	go-microtubule-motor-activity
go-metal-ion-homeostasis	1.81447e-126	0.264333	0.92	0.695	1.73064e-122	1	go-metal-ion-homeostasis
go-locomotory-behavior	4.69537e-126	0.602624	0.987	0.769	4.47844e-122	1	go-locomotory-behavior
go-adenylate-cyclase-binding	6.48769e-126	0.439974	0.984	0.989	6.18796e-122	1	go-adenylate-cyclase-binding
go-positive-regulation-of-secretion	7.20219e-126	0.308978	0.966	0.895	6.86945e-122	1	go-positive-regulation-of-secretion
go-signal-recognition-particle-endoplasmic-reticulum-targeting	1.26109e-125	0.504697	0.966	0.993	1.20282e-121	1	go-signal-recognition-particle-endoplasmic-reticulum-targeting
go-behavior	4.45346e-125	0.836869	1	0.808	4.24771e-121	1	go-behavior
go-endocrine-system-development	8.38113e-125	0.289863	0.961	0.914	7.99392e-121	1	go-endocrine-system-development
go-glandular-epithelial-cell-differentiation	1.45353e-124	0.31523	0.972	0.906	1.38638e-120	1	go-glandular-epithelial-cell-differentiation
go-regulation-of-ryanodine-sensitive-calcium-release-channel-activity	2.42199e-124	0.319974	0.982	0.971	2.31009e-120	1	go-regulation-of-ryanodine-sensitive-calcium-release-channel-activity
go-negative-regulation-of-response-to-drug	1.73801e-123	0.265226	0.951	0.97	1.65771e-119	1	go-negative-regulation-of-response-to-drug
go-cell-junction	2.55953e-122	0.49409	1	1	2.44128e-118	1	go-cell-junction
go-positive-regulation-of-transmembrane-transport	3.83683e-122	0.551368	0.984	0.971	3.65957e-118	1	go-positive-regulation-of-transmembrane-transport
go-associative-learning	5.88166e-122	0.373534	0.992	0.947	5.60993e-118	1	go-associative-learning
go-actin-filament-based-movement	1.11571e-121	0.664306	0.984	0.971	1.06417e-117	1	go-actin-filament-based-movement
go-negative-regulation-of-ubiquitin-protein-ligase-activity	4.91446e-121	0.494697	1	0.999	4.68742e-117	1	go-negative-regulation-of-ubiquitin-protein-ligase-activity
go-nitric-oxide-synthase-binding	7.88274e-120	0.363598	0.966	0.955	7.51855e-116	1	go-nitric-oxide-synthase-binding
go-postsynapse	1.74275e-118	0.807695	1	0.999	1.66224e-114	1	go-postsynapse
go-import-across-plasma-membrane	3.84025e-118	0.254272	0.956	0.872	3.66283e-114	1	go-import-across-plasma-membrane
go-columnar-cuboidal-epithelial-cell-differentiation	1.21238e-117	0.25416	0.966	0.954	1.15637e-113	1	go-columnar-cuboidal-epithelial-cell-differentiation
go-regulation-of-postsynapse-organization	1.76501e-117	0.271507	0.956	0.859	1.68347e-113	1	go-regulation-of-postsynapse-organization
go-neuromuscular-process-controlling-balance	2.69252e-117	0.302998	0.959	0.943	2.56812e-113	1	go-neuromuscular-process-controlling-balance
go-columnar-cuboidal-epithelial-cell-development	5.02825e-117	0.295825	0.972	0.964	4.79595e-113	1	go-columnar-cuboidal-epithelial-cell-development
go-l-alpha-amino-acid-transmembrane-transport	5.96005e-117	0.312659	0.933	0.917	5.6847e-113	1	go-l-alpha-amino-acid-transmembrane-transport
go-neuron-part	1.44314e-116	0.679785	1	1	1.37647e-112	1	go-neuron-part
go-wnt-signaling-pathway-calcium-modulating-pathway	2.1669e-116	0.36885	0.984	0.972	2.06679e-112	1	go-wnt-signaling-pathway-calcium-modulating-pathway
go-protein-targeting	3.21927e-116	0.371331	1	1	3.07054e-112	1	go-protein-targeting
go-integral-component-of-presynaptic-active-zone-membrane	3.70171e-116	0.354946	0.99	0.842	3.5307e-112	1	go-integral-component-of-presynaptic-active-zone-membrane
go-regulation-of-cardiac-conduction	7.75468e-116	0.557956	0.982	0.942	7.39641e-112	1	go-regulation-of-cardiac-conduction
go-protein-tag	3.04221e-114	0.536234	1	1	2.90166e-110	1	go-protein-tag
go-chromaffin-granule	9.75561e-114	0.651104	0.953	0.976	9.3049e-110	1	go-chromaffin-granule
go-regulation-of-cell-communication-by-electrical-coupling	2.59741e-113	0.468671	0.956	0.993	2.47741e-109	1	go-regulation-of-cell-communication-by-electrical-coupling
go-central-nervous-system-neuron-development	2.79454e-113	0.272212	0.979	0.942	2.66544e-109	1	go-central-nervous-system-neuron-development
go-negative-regulation-of-neural-precursor-cell-proliferation	3.05756e-113	0.440478	0.977	0.982	2.9163e-109	1	go-negative-regulation-of-neural-precursor-cell-proliferation
go-presynaptic-active-zone-membrane	5.03983e-113	0.410712	0.984	0.802	4.80699e-109	1	go-presynaptic-active-zone-membrane
go-relaxation-of-cardiac-muscle	9.4477e-113	0.412893	0.984	0.97	9.01121e-109	1	go-relaxation-of-cardiac-muscle
go-mhc-class-ii-protein-complex-binding	2.57054e-112	0.829224	1	1	2.45178e-108	1	go-mhc-class-ii-protein-complex-binding
go-positive-regulation-of-hormone-secretion	1.11283e-111	0.322636	0.969	0.943	1.06142e-107	1	go-positive-regulation-of-hormone-secretion
go-mhc-protein-complex-binding	1.68911e-111	0.905427	1	0.998	1.61107e-107	1	go-mhc-protein-complex-binding
go-rna-catabolic-process	1.74213e-111	0.321716	1	1	1.66164e-107	1	go-rna-catabolic-process
go-cell-communication-involved-in-cardiac-conduction	1.77788e-111	0.394183	0.992	0.918	1.69574e-107	1	go-cell-communication-involved-in-cardiac-conduction
go-negative-regulation-of-cell-development	8.52014e-111	0.387696	0.987	0.95	8.12651e-107	1	go-negative-regulation-of-cell-development
go-chromatin-organization-involved-in-regulation-of-transcription	9.05608e-111	0.385761	0.974	0.976	8.63769e-107	1	go-chromatin-organization-involved-in-regulation-of-transcription
go-synapse-part	2.36896e-110	0.760635	1	1	2.25951e-106	1	go-synapse-part
go-positive-regulation-of-endothelial-cell-chemotaxis	5.02903e-110	0.253967	0.969	0.974	4.79669e-106	1	go-positive-regulation-of-endothelial-cell-chemotaxis
go-postsynaptic-cytoskeleton-organization	4.00952e-109	0.871413	1	1	3.82428e-105	1	go-postsynaptic-cytoskeleton-organization
go-positive-regulation-of-atp-biosynthetic-process	6.08085e-109	0.378879	0.961	0.998	5.79992e-105	1	go-positive-regulation-of-atp-biosynthetic-process
go-dna-polymerase-binding	1.19766e-108	0.456492	0.997	0.998	1.14233e-104	1	go-dna-polymerase-binding
go-postsynaptic-actin-cytoskeleton-organization	4.19771e-108	0.769847	1	1	4.00377e-104	1	go-postsynaptic-actin-cytoskeleton-organization
go-neuron-projection	6.88422e-108	0.703114	1	1	6.56617e-104	1	go-neuron-projection
go-structural-constituent-of-ribosome	1.06195e-107	0.46514	1	1	1.01289e-103	1	go-structural-constituent-of-ribosome
go-structural-molecule-activity	1.75764e-107	0.635513	1	1	1.67644e-103	1	go-structural-molecule-activity
go-regulation-of-amyloid-beta-formation	8.37119e-107	0.334191	0.992	0.993	7.98445e-103	1	go-regulation-of-amyloid-beta-formation
go-regulation-of-regulated-secretory-pathway	4.07023e-105	0.400253	0.979	0.838	3.88219e-101	1	go-regulation-of-regulated-secretory-pathway
go-regulation-of-secretion	4.41751e-105	0.888178	1	0.97	4.21342e-101	1	go-regulation-of-secretion
go-trans-golgi-network-transport-vesicle-membrane	3.29959e-103	0.250153	0.948	0.977	3.14714e-99	1	go-trans-golgi-network-transport-vesicle-membrane
go-regulation-of-neurotransmitter-levels	5.15656e-103	0.89712	1	0.96	4.91833e-99	1	go-regulation-of-neurotransmitter-levels
go-regulation-of-transport	5.7632e-103	0.559884	1	1	5.49694e-99	1	go-regulation-of-transport
go-cerebellar-cortex-development	5.95734e-103	0.270067	0.972	0.947	5.68211e-99	1	go-cerebellar-cortex-development
go-regulation-of-peptide-secretion	1.08552e-102	0.822106	1	0.976	1.03537e-98	1	go-regulation-of-peptide-secretion
go-negative-regulation-of-neuron-apoptotic-process	2.27834e-102	0.324932	0.995	0.983	2.17308e-98	1	go-negative-regulation-of-neuron-apoptotic-process
go-establishment-of-protein-localization-to-organelle	3.58885e-102	0.292248	1	1	3.42305e-98	1	go-establishment-of-protein-localization-to-organelle
go-regulation-of-ribonuclease-activity	4.81966e-102	0.328665	0.938	0.996	4.59699e-98	1	go-regulation-of-ribonuclease-activity
go-organic-cyclic-compound-catabolic-process	6.84785e-102	0.315231	1	1	6.53148e-98	1	go-organic-cyclic-compound-catabolic-process
go-cell-body	1.07879e-101	0.704943	1	1	1.02895e-97	1	go-cell-body
go-negative-regulation-of-neuron-differentiation	1.2345e-101	0.413286	0.99	0.974	1.17746e-97	1	go-negative-regulation-of-neuron-differentiation
go-peptide-secretion	1.84119e-101	0.829036	1	0.996	1.75613e-97	1	go-peptide-secretion
go-apical-dendrite	2.04873e-101	0.30981	0.984	0.969	1.95408e-97	1	go-apical-dendrite
go-hormone-transport1	3.10983e-101	0.767649	1	0.997	2.96615e-97	1	go-hormone-transport
go-mrna-splice-site-selection	8.96498e-101	0.440108	0.972	0.971	8.55079e-97	1	go-mrna-splice-site-selection
go-monovalent-inorganic-cation-homeostasis	3.68609e-100	0.349585	0.984	0.97	3.51579e-96	1	go-monovalent-inorganic-cation-homeostasis
go-neurotransmitter-transport	4.17136e-100	0.817028	0.997	0.775	3.97865e-96	1	go-neurotransmitter-transport
go-atp-dependent-microtubule-motor-activity-plus-end-directed	8.11135e-100	0.325175	0.982	0.948	7.73661e-96	1	go-atp-dependent-microtubule-motor-activity-plus-end-directed
go-antigen-processing-and-presentation-via-mhc-class-ib	1.37164e-99	0.535209	1	0.998	1.30827e-95	1	go-antigen-processing-and-presentation-via-mhc-class-ib
go-response-to-calcium-ion	1.53251e-99	0.776076	1	0.999	1.4617e-95	1	go-response-to-calcium-ion
go-signal-release1	1.48085e-98	0.766289	1	0.998	1.41244e-94	1	go-signal-release
go-contractile-fiber	1.88434e-98	0.608952	0.979	0.985	1.79729e-94	1	go-contractile-fiber
go-ficolin-1-rich-granule-membrane	1.50163e-97	0.539348	0.995	0.995	1.43225e-93	1	go-ficolin-1-rich-granule-membrane
go-calcium-transporting-atpase-activity	7.19112e-97	0.366349	0.938	0.982	6.85889e-93	1	go-calcium-transporting-atpase-activity
go-regulation-of-synaptic-plasticity	8.00961e-97	0.656552	0.992	0.733	7.63956e-93	1	go-regulation-of-synaptic-plasticity
go-peptide-binding	9.42484e-97	0.498486	0.995	0.992	8.98942e-93	1	go-peptide-binding
go-somatodendritic-compartment	3.63477e-96	0.699819	1	1	3.46684e-92	1	go-somatodendritic-compartment
go-posttranscriptional-regulation-of-gene-expression	1.66185e-95	0.349662	0.992	0.883	1.58507e-91	1	go-posttranscriptional-regulation-of-gene-expression
go-response-to-purine-containing-compound	2.7159e-95	0.311226	0.984	0.984	2.59043e-91	1	go-response-to-purine-containing-compound
go-secondary-lysosome	5.5552e-95	0.668789	0.997	1	5.29855e-91	1	go-secondary-lysosome
go-neuron-to-neuron-synapse1	6.22573e-95	0.716061	1	0.999	5.9381e-91	1	go-neuron-to-neuron-synapse
go-polysome	2.51782e-94	0.385569	1	1	2.4015e-90	1	go-polysome
go-cellular-response-to-x-ray	2.6643e-94	0.470423	0.964	0.995	2.54121e-90	1	go-cellular-response-to-x-ray
go-negative-regulation-of-nervous-system-development	3.05375e-94	0.442538	0.987	0.968	2.91267e-90	1	go-negative-regulation-of-nervous-system-development
go-regulation-of-hormone-levels	3.64625e-94	0.839561	1	0.967	3.47779e-90	1	go-regulation-of-hormone-levels
go-limbic-system-development	2.05613e-93	0.320266	0.99	0.979	1.96113e-89	1	go-limbic-system-development
go-chaperone-mediated-autophagy	6.76006e-93	0.639355	1	1	6.44775e-89	1	go-chaperone-mediated-autophagy
go-cell-communication-by-electrical-coupling-involved-in-cardiac-conduction	1.56634e-92	0.437571	0.99	0.989	1.49397e-88	1	go-cell-communication-by-electrical-coupling-involved-in-cardiac-conduction
go-calmodulin-binding	3.03732e-92	0.274528	0.974	0.984	2.897e-88	1	go-calmodulin-binding
go-mrna-5-utr-binding	8.2042e-92	0.437045	1	1	7.82517e-88	1	go-mrna-5-utr-binding
go-forebrain-development	2.16913e-90	0.420952	1	0.963	2.06892e-86	1	go-forebrain-development
go-low-density-lipoprotein-particle-receptor-binding	4.89648e-90	0.452042	0.997	1	4.67027e-86	1	go-low-density-lipoprotein-particle-receptor-binding
go-active-ion-transmembrane-transporter-activity	1.2509e-89	0.561746	1	0.991	1.19311e-85	1	go-active-ion-transmembrane-transporter-activity
go-structural-constituent-of-synapse1	2.74626e-89	0.514191	1	0.984	2.61938e-85	1	go-structural-constituent-of-synapse
go-schaffer-collateral--ca1-synapse	9.19123e-89	0.498651	0.997	0.864	8.76659e-85	1	go-schaffer-collateral--ca1-synapse
go-secretory-vesicle	2.24033e-88	0.399318	1	1	2.13683e-84	1	go-secretory-vesicle
go-secretion	2.70524e-88	0.403665	1	1	2.58026e-84	1	go-secretion
go-cytoplasmic-translation	6.31895e-88	0.378286	1	1	6.02701e-84	1	go-cytoplasmic-translation
go-positive-regulation-of-lamellipodium-assembly	1.31589e-87	0.436879	0.995	0.998	1.25509e-83	1	go-positive-regulation-of-lamellipodium-assembly
go-chemical-homeostasis	3.74861e-87	0.715768	1	0.998	3.57543e-83	1	go-chemical-homeostasis
go-transport-vesicle-membrane	1.31655e-86	0.599289	1	1	1.25573e-82	1	go-transport-vesicle-membrane
go-cellular-chemical-homeostasis	2.8524e-86	0.795144	1	0.997	2.72062e-82	1	go-cellular-chemical-homeostasis
go-crd-mediated-mrna-stability-complex	4.36237e-86	0.54167	0.99	1	4.16083e-82	1	go-crd-mediated-mrna-stability-complex
go-neuromuscular-junction	5.97254e-86	0.407733	0.992	0.969	5.69661e-82	1	go-neuromuscular-junction
go-ribonucleoprotein-complex	1.13327e-85	0.484832	1	0.999	1.08091e-81	1	go-ribonucleoprotein-complex
go-cell-projection-part	1.34973e-85	0.598125	1	1	1.28737e-81	1	go-cell-projection-part
go-regulation-of-trans-synaptic-signaling1	7.87175e-85	0.762325	0.997	0.755	7.50807e-81	1	go-regulation-of-trans-synaptic-signaling
go-regulation-of-ubiquitin-protein-ligase-activity	4.89992e-84	0.615667	1	1	4.67354e-80	1	go-regulation-of-ubiquitin-protein-ligase-activity
go-positive-regulation-of-peptide-hormone-secretion1	6.01557e-84	0.297726	0.979	0.972	5.73765e-80	1	go-positive-regulation-of-peptide-hormone-secretion
go-regulation-of-neurotransmitter-secretion	2.60465e-83	0.404919	0.992	0.724	2.48432e-79	1	go-regulation-of-neurotransmitter-secretion
go-regulation-of-hormone-secretion1	6.92015e-83	0.730467	1	0.982	6.60044e-79	1	go-regulation-of-hormone-secretion
go-dense-body	1.33421e-82	0.501831	0.883	0.969	1.27257e-78	1	go-dense-body
go-autolysosome	2.83592e-82	0.47677	0.997	1	2.7049e-78	1	go-autolysosome
go-glial-cell-projection1	5.96277e-82	0.279229	0.982	0.989	5.68729e-78	1	go-glial-cell-projection
go-pre-mrna-binding	1.1392e-81	0.551441	0.995	1	1.08657e-77	1	go-pre-mrna-binding
go-glutamate-receptor-binding	2.57848e-81	0.258863	0.99	0.99	2.45935e-77	1	go-glutamate-receptor-binding
go-axon-part1	3.49359e-81	0.564453	1	1	3.33218e-77	1	go-axon-part
go-axon1	4.2219e-81	0.563874	1	1	4.02685e-77	1	go-axon
go-ribosome	6.94318e-81	0.342521	1	1	6.6224e-77	1	go-ribosome
go-positive-regulation-of-signal-transduction-by-p53-class-mediator	7.86185e-81	0.637958	1	1	7.49864e-77	1	go-positive-regulation-of-signal-transduction-by-p53-class-mediator
go-protein-localization-to-synapse1	9.01506e-81	0.34638	0.99	0.887	8.59856e-77	1	go-protein-localization-to-synapse
go-receptor-localization-to-synapse1	2.94691e-80	0.282209	0.977	0.94	2.81076e-76	1	go-receptor-localization-to-synapse
go-regulation-of-calcium-ion-dependent-exocytosis	4.22165e-80	0.509515	1	0.742	4.02661e-76	1	go-regulation-of-calcium-ion-dependent-exocytosis
go-synaptic-vesicle-docking	9.16082e-80	0.355272	0.896	0.854	8.73759e-76	1	go-synaptic-vesicle-docking
go-calcium-dependent-protein-binding	1.56411e-79	0.642315	1	1	1.49185e-75	1	go-calcium-dependent-protein-binding
go-receptor-internalization	1.57497e-79	0.445364	1	0.994	1.5022e-75	1	go-receptor-internalization
go-peptide-hormone-secretion1	2.43415e-79	0.678656	1	0.997	2.32169e-75	1	go-peptide-hormone-secretion
go-neuron-differentiation	2.87475e-79	0.487602	1	1	2.74194e-75	1	go-neuron-differentiation
go-regulation-of-amyloid-fibril-formation	4.14721e-79	0.293511	0.896	0.966	3.95561e-75	1	go-regulation-of-amyloid-fibril-formation
go-heterotrimeric-g-protein-complex	1.99933e-78	0.429977	0.987	0.939	1.90696e-74	1	go-heterotrimeric-g-protein-complex
go-substantia-nigra-development	2.57793e-78	0.468318	1	1	2.45883e-74	1	go-substantia-nigra-development
go-zymogen-granule	3.88946e-78	0.439932	0.984	0.998	3.70977e-74	1	go-zymogen-granule
go-neuron-development	4.76445e-78	0.461768	1	1	4.54433e-74	1	go-neuron-development
go-positive-regulation-of-transport	5.19199e-78	0.416414	1	1	4.95212e-74	1	go-positive-regulation-of-transport
go-neurogenesis	7.25775e-78	0.475847	1	1	6.92244e-74	1	go-neurogenesis
go-distal-axon1	1.65873e-77	0.60815	0.997	1	1.5821e-73	1	go-distal-axon
go-regulation-of-neurotransmitter-transport	1.66796e-77	0.597402	1	0.749	1.5909e-73	1	go-regulation-of-neurotransmitter-transport
go-regulation-of-amyloid-precursor-protein-catabolic-process	1.95506e-77	0.402688	0.992	0.995	1.86474e-73	1	go-regulation-of-amyloid-precursor-protein-catabolic-process
go-supramolecular-complex	2.23223e-77	0.699119	0.997	0.99	2.1291e-73	1	go-supramolecular-complex
go-negative-regulation-of-ryanodine-sensitive-calcium-release-channel-activity	2.51627e-77	0.340787	0.972	0.996	2.40002e-73	1	go-negative-regulation-of-ryanodine-sensitive-calcium-release-channel-activity
go-import-into-cell	4.02363e-77	0.701587	1	0.999	3.83774e-73	1	go-import-into-cell
go-synapse-organization1	7.77367e-77	0.592491	0.997	0.949	7.41453e-73	1	go-synapse-organization
go-atpase-activity-coupled-to-movement-of-substances	9.70481e-77	0.472356	0.997	0.993	9.25644e-73	1	go-atpase-activity-coupled-to-movement-of-substances
go-seminiferous-tubule-development	2.53944e-76	0.266669	0.94	0.974	2.42212e-72	1	go-seminiferous-tubule-development
go-dendritic-tree1	5.42179e-76	0.585019	1	1	5.1713e-72	1	go-dendritic-tree
go-central-nervous-system-development	1.33479e-75	0.481995	1	1	1.27312e-71	1	go-central-nervous-system-development
go-adenylate-cyclase-activator-activity	5.04319e-75	0.542519	0.992	0.998	4.81019e-71	1	go-adenylate-cyclase-activator-activity
go-intercalated-disc	7.15436e-75	0.315959	0.979	0.98	6.82383e-71	1	go-intercalated-disc
go-ribosomal-subunit	9.77969e-75	0.310973	1	1	9.32787e-71	1	go-ribosomal-subunit
go-transport-vesicle	1.2046e-74	0.477289	1	1	1.14895e-70	1	go-transport-vesicle
go-regulation-of-atp-biosynthetic-process	3.62059e-74	0.327271	0.995	0.998	3.45332e-70	1	go-regulation-of-atp-biosynthetic-process
go-motor-activity	1.48167e-73	0.546399	1	0.975	1.41321e-69	1	go-motor-activity
go-response-to-alcohol	2.9184e-73	0.377911	1	0.994	2.78357e-69	1	go-response-to-alcohol
go-glutamatergic-synapse	6.71167e-73	0.626734	1	1	6.40159e-69	1	go-glutamatergic-synapse
go-response-to-metal-ion	5.48997e-72	0.505376	1	1	5.23634e-68	1	go-response-to-metal-ion
go-response-to-cold	8.18141e-72	0.664802	1	0.998	7.80343e-68	1	go-response-to-cold
go-neural-nucleus-development	2.19521e-71	0.525665	1	1	2.09379e-67	1	go-neural-nucleus-development
go-positive-regulation-of-lamellipodium-organization	2.48502e-70	0.368456	0.995	0.998	2.37021e-66	1	go-positive-regulation-of-lamellipodium-organization
go-pancreatic-a-cell-differentiation	2.99575e-70	0.695928	0.979	0.816	2.85735e-66	1	go-pancreatic-a-cell-differentiation
go-presynapse1	6.05179e-70	0.70226	0.997	0.985	5.7722e-66	1	go-presynapse
go-pancreas-development1	9.65989e-70	0.533085	0.995	0.983	9.2136e-66	1	go-pancreas-development
go-rrna-binding	2.99925e-69	0.348363	1	1	2.86068e-65	1	go-rrna-binding
go-regulation-of-nervous-system-development1	3.27291e-69	0.560144	0.997	1	3.1217e-65	1	go-regulation-of-nervous-system-development
go-polymeric-cytoskeletal-fiber	3.51987e-69	0.619926	0.997	0.998	3.35725e-65	1	go-polymeric-cytoskeletal-fiber
go-nucleosomal-dna-binding	6.40789e-69	0.588647	1	0.999	6.11184e-65	1	go-nucleosomal-dna-binding
go-endocytosis	2.17496e-68	0.523465	1	0.996	2.07447e-64	1	go-endocytosis
go-rough-endoplasmic-reticulum	6.58901e-68	0.420638	1	1	6.28459e-64	1	go-rough-endoplasmic-reticulum
go-head-development	7.27655e-68	0.430973	1	1	6.94038e-64	1	go-head-development
go-transmembrane-transport	8.56647e-68	0.576167	1	0.994	8.1707e-64	1	go-transmembrane-transport
go-microfilament-motor-activity	2.38977e-67	0.26235	0.982	0.99	2.27937e-63	1	go-microfilament-motor-activity
go-calcium-ion-regulated-exocytosis1	2.5227e-67	0.630173	1	0.923	2.40615e-63	1	go-calcium-ion-regulated-exocytosis
go-regulation-of-cell-communication-by-electrical-coupling-involved-in-cardiac-conduction	3.2363e-67	0.445909	0.93	0.997	3.08679e-63	1	go-regulation-of-cell-communication-by-electrical-coupling-involved-in-cardiac-conduction
go-primary-active-transmembrane-transporter-activity	3.46213e-67	0.562269	1	0.997	3.30217e-63	1	go-primary-active-transmembrane-transporter-activity
go-synaptic-vesicle-localization1	5.918e-67	0.663012	1	0.991	5.64459e-63	1	go-synaptic-vesicle-localization
go-cell-substrate-junction	6.88289e-67	0.291929	1	1	6.5649e-63	1	go-cell-substrate-junction
go-regulation-of-establishment-of-protein-localization	1.14028e-66	0.313753	1	1	1.0876e-62	1	go-regulation-of-establishment-of-protein-localization
go-signal-release-from-synapse1	1.23472e-66	0.636092	1	0.78	1.17768e-62	1	go-signal-release-from-synapse
go-positive-regulation-of-dendritic-spine-morphogenesis1	2.76348e-66	0.323685	0.984	0.991	2.63581e-62	1	go-positive-regulation-of-dendritic-spine-morphogenesis
go-negative-regulation-of-protein-binding	3.45384e-66	0.288246	0.997	0.992	3.29428e-62	1	go-negative-regulation-of-protein-binding
go-hindbrain-development	4.68272e-66	0.35243	0.984	0.985	4.46638e-62	1	go-hindbrain-development
go-response-to-camp	6.0008e-66	0.262638	0.992	0.987	5.72357e-62	1	go-response-to-camp
go-axo-dendritic-protein-transport1	6.43357e-66	0.57678	0.997	0.999	6.13633e-62	1	go-axo-dendritic-protein-transport
go-midbrain-development	6.7134e-66	0.471458	1	1	6.40324e-62	1	go-midbrain-development
go-regulation-of-cell-development	8.17546e-66	0.462583	1	1	7.79776e-62	1	go-regulation-of-cell-development
go-secretory-granule-membrane	1.05851e-65	0.419054	1	1	1.0096e-61	1	go-secretory-granule-membrane
go-presynaptic-active-zone1	1.17856e-65	0.587416	0.995	0.815	1.12411e-61	1	go-presynaptic-active-zone
go-regulation-of-peptide-hormone-secretion1	2.03613e-65	0.648328	1	0.994	1.94207e-61	1	go-regulation-of-peptide-hormone-secretion
go-vesicle-membrane	2.70543e-65	0.334337	1	1	2.58044e-61	1	go-vesicle-membrane
go-secretory-granule	3.97915e-65	0.348588	1	1	3.79532e-61	1	go-secretory-granule
go-anchoring-junction	3.00285e-64	0.280344	1	1	2.86412e-60	1	go-anchoring-junction
go-positive-regulation-of-sister-chromatid-cohesion	5.19371e-64	0.310566	0.935	0.991	4.95376e-60	1	go-positive-regulation-of-sister-chromatid-cohesion
go-nitric-oxide-synthase-regulator-activity	1.04836e-63	0.54853	1	1	9.99922e-60	1	go-nitric-oxide-synthase-regulator-activity
go-interleukin-27-mediated-signaling-pathway	1.08888e-63	0.271873	0.972	0.998	1.03857e-59	1	go-interleukin-27-mediated-signaling-pathway
go-metencephalon-development	1.28675e-63	0.270484	0.977	0.954	1.2273e-59	1	go-metencephalon-development
go-vesicle-mediated-transport-in-synapse1	1.54403e-63	0.589206	1	1	1.47269e-59	1	go-vesicle-mediated-transport-in-synapse
go-nuclear-envelope-lumen1	2.69383e-63	0.382838	0.889	0.98	2.56938e-59	1	go-nuclear-envelope-lumen
go-synaptic-vesicle-cycle1	6.986e-63	0.669047	1	0.99	6.66325e-59	1	go-synaptic-vesicle-cycle
go-positive-regulation-of-oxidoreductase-activity	7.24357e-63	0.297726	0.987	0.995	6.90892e-59	1	go-positive-regulation-of-oxidoreductase-activity
go-carbohydrate-homeostasis	9.74611e-62	0.468166	1	1	9.29584e-58	1	go-carbohydrate-homeostasis
go-small-ribosomal-subunit	1.01094e-61	0.309193	1	1	9.64236e-58	1	go-small-ribosomal-subunit
go-large-ribosomal-subunit	1.89635e-61	0.298635	1	1	1.80874e-57	1	go-large-ribosomal-subunit
go-structural-constituent-of-cytoskeleton	2.12551e-61	0.559376	1	1	2.02732e-57	1	go-structural-constituent-of-cytoskeleton
go-regulation-of-extent-of-cell-growth	2.27304e-61	0.26423	0.982	0.984	2.16803e-57	1	go-regulation-of-extent-of-cell-growth
go-enzyme-inhibitor-activity	7.91949e-61	0.514881	0.997	0.992	7.55361e-57	1	go-enzyme-inhibitor-activity
go-synaptic-vesicle-exocytosis1	9.61841e-61	0.597343	1	0.886	9.17404e-57	1	go-synaptic-vesicle-exocytosis
go-gaba-receptor-binding	1.09298e-60	0.283199	0.984	0.994	1.04248e-56	1	go-gaba-receptor-binding
go-positive-regulation-of-multicellular-organismal-process	2.56255e-60	0.33852	0.997	0.966	2.44416e-56	1	go-positive-regulation-of-multicellular-organismal-process
go-negative-regulation-of-actin-filament-polymerization	3.02663e-60	0.28828	0.979	0.997	2.8868e-56	1	go-negative-regulation-of-actin-filament-polymerization
go-insulin-secretion1	1.16998e-59	0.579318	1	0.999	1.11592e-55	1	go-insulin-secretion
go-regulation-of-insulin-secretion1	3.93359e-59	0.601653	1	0.998	3.75186e-55	1	go-regulation-of-insulin-secretion
go-proton-transmembrane-transporter-activity	5.71007e-59	0.463821	1	0.997	5.44626e-55	1	go-proton-transmembrane-transporter-activity
go-dendritic-spine-morphogenesis1	5.83871e-59	0.389417	0.987	0.993	5.56896e-55	1	go-dendritic-spine-morphogenesis
go-crd-mediated-mrna-stabilization	6.97102e-58	0.605686	0.902	0.991	6.64896e-54	1	go-crd-mediated-mrna-stabilization
go-ion-channel-binding	1.96391e-57	0.538978	0.997	1	1.87318e-53	1	go-ion-channel-binding
go-negative-regulation-of-cellular-amide-metabolic-process	3.44092e-57	0.43787	1	0.998	3.28195e-53	1	go-negative-regulation-of-cellular-amide-metabolic-process
go-rna-stabilization	3.90903e-57	0.501575	1	0.999	3.72843e-53	1	go-rna-stabilization
go-regulation-of-sister-chromatid-cohesion	1.13459e-56	0.310631	0.992	0.998	1.08217e-52	1	go-regulation-of-sister-chromatid-cohesion
go-synaptic-vesicle-priming1	5.39512e-56	0.265614	0.977	0.903	5.14587e-52	1	go-synaptic-vesicle-priming
go-regulation-of-synaptic-vesicle-transport	5.89349e-56	0.482853	1	0.837	5.62121e-52	1	go-regulation-of-synaptic-vesicle-transport
go-endocrine-pancreas-development1	1.02486e-55	0.377487	0.997	0.987	9.77513e-52	1	go-endocrine-pancreas-development
go-enteroendocrine-cell-differentiation1	4.48554e-55	0.424726	0.997	0.975	4.27831e-51	1	go-enteroendocrine-cell-differentiation
go-ribosomal-large-subunit-assembly	1.07051e-54	0.409124	1	0.999	1.02106e-50	1	go-ribosomal-large-subunit-assembly
go-sister-chromatid-cohesion	2.03274e-54	0.270562	0.984	0.994	1.93882e-50	1	go-sister-chromatid-cohesion
go-cytoplasmic-side-of-rough-endoplasmic-reticulum-membrane	3.7967e-54	0.283834	0.891	0.993	3.62129e-50	1	go-cytoplasmic-side-of-rough-endoplasmic-reticulum-membrane
go-axon-development	4.90315e-54	0.486367	1	0.993	4.67663e-50	1	go-axon-development
go-negative-regulation-of-microtubule-polymerization	1.37535e-53	0.337552	0.948	0.96	1.31181e-49	1	go-negative-regulation-of-microtubule-polymerization
go-respiratory-chain-complex-iv	1.51538e-53	0.384471	0.984	0.999	1.44537e-49	1	go-respiratory-chain-complex-iv
go-positive-regulation-of-nervous-system-development	1.91729e-53	0.528405	1	1	1.82871e-49	1	go-positive-regulation-of-nervous-system-development
go-negative-regulation-of-proteolysis	2.62844e-53	0.461674	1	0.986	2.507e-49	1	go-negative-regulation-of-proteolysis
go-regulation-of-neuron-differentiation1	3.02393e-53	0.428711	1	1	2.88423e-49	1	go-regulation-of-neuron-differentiation
go-positive-regulation-of-developmental-process	5.56196e-53	0.291752	0.987	0.966	5.305e-49	1	go-positive-regulation-of-developmental-process
go-regulation-of-dendritic-spine-morphogenesis1	6.80704e-53	0.394842	0.99	0.991	6.49255e-49	1	go-regulation-of-dendritic-spine-morphogenesis
go-regulation-of-axonogenesis1	7.32829e-53	0.329947	0.984	0.979	6.98972e-49	1	go-regulation-of-axonogenesis
go-positive-regulation-of-cell-development	3.038e-52	0.439345	1	1	2.89764e-48	1	go-positive-regulation-of-cell-development
go-pigment-granule	1.45171e-51	0.288219	1	1	1.38464e-47	1	go-pigment-granule
go-extrinsic-component-of-cytoplasmic-side-of-plasma-membrane	3.45644e-51	0.428688	1	0.999	3.29675e-47	1	go-extrinsic-component-of-cytoplasmic-side-of-plasma-membrane
go-cytoskeletal-protein-binding	7.13514e-51	0.286396	1	1	6.80549e-47	1	go-cytoskeletal-protein-binding
go-response-to-nitrogen-compound	1.03563e-50	0.263349	1	1	9.87785e-47	1	go-response-to-nitrogen-compound
go-regulation-of-sodium-ion-transport	1.36957e-50	0.318624	0.992	0.986	1.30629e-46	1	go-regulation-of-sodium-ion-transport
go-extrinsic-component-of-plasma-membrane	1.50145e-49	0.349468	0.995	0.997	1.43208e-45	1	go-extrinsic-component-of-plasma-membrane
go-rna-polymerase-ii-activating-transcription-factor-binding1	1.75364e-49	0.470772	0.997	1	1.67262e-45	1	go-rna-polymerase-ii-activating-transcription-factor-binding
go-positive-regulation-of-sodium-ion-transmembrane-transporter-activity	3.2261e-49	0.331415	0.977	0.99	3.07706e-45	1	go-positive-regulation-of-sodium-ion-transmembrane-transporter-activity
go-microtubule-based-movement	3.88346e-49	0.402356	1	1	3.70404e-45	1	go-microtubule-based-movement
go-regulation-of-cell-projection-organization	4.07227e-49	0.334629	1	1	3.88413e-45	1	go-regulation-of-cell-projection-organization
go-cellular-response-to-inorganic-substance	5.17652e-49	0.489801	0.997	1	4.93736e-45	1	go-cellular-response-to-inorganic-substance
go-homeostatic-process	6.12307e-49	0.29116	1	1	5.84019e-45	1	go-homeostatic-process
go-exocytic-vesicle1	8.43739e-49	0.535921	1	1	8.04758e-45	1	go-exocytic-vesicle
go-response-to-drug	1.14962e-48	0.424511	1	0.999	1.0965e-44	1	go-response-to-drug
go-smooth-endoplasmic-reticulum	1.72291e-48	0.353357	1	1	1.64331e-44	1	go-smooth-endoplasmic-reticulum
go-tpr-domain-binding	2.11804e-48	0.356162	0.951	0.995	2.02019e-44	1	go-tpr-domain-binding
go-cell-part-morphogenesis	3.89745e-48	0.367976	1	1	3.71739e-44	1	go-cell-part-morphogenesis
go-positive-regulation-of-cell-projection-organization	6.60084e-48	0.337883	1	1	6.29588e-44	1	go-positive-regulation-of-cell-projection-organization
go-dendritic-transport	6.99642e-48	0.272817	0.907	0.988	6.67318e-44	1	go-dendritic-transport
go-cytoskeletal-anchoring-at-plasma-membrane	2.08174e-47	0.366653	0.873	0.975	1.98557e-43	1	go-cytoskeletal-anchoring-at-plasma-membrane
go-positive-regulation-of-sodium-ion-transmembrane-transport	2.23365e-47	0.383672	0.995	0.998	2.13045e-43	1	go-positive-regulation-of-sodium-ion-transmembrane-transport
go-dense-core-granule-transport1	5.20855e-47	0.371325	0.902	0.968	4.96792e-43	1	go-dense-core-granule-transport
go-positive-regulation-of-sodium-ion-transport	5.88249e-47	0.465229	1	0.996	5.61072e-43	1	go-positive-regulation-of-sodium-ion-transport
go-axo-dendritic-transport1	1.92731e-46	0.329071	1	1	1.83827e-42	1	go-axo-dendritic-transport
go-negative-regulation-of-gene-expression-epigenetic	3.10781e-46	0.337558	1	0.996	2.96423e-42	1	go-negative-regulation-of-gene-expression-epigenetic
go-dna-conformation-change	7.48512e-46	0.453585	1	1	7.13931e-42	1	go-dna-conformation-change
go-positive-regulation-of-myoblast-proliferation	8.55893e-46	0.257054	0.811	0.928	8.1635e-42	1	go-positive-regulation-of-myoblast-proliferation
go-cell-morphogenesis-involved-in-neuron-differentiation	9.33752e-46	0.394973	1	1	8.90613e-42	1	go-cell-morphogenesis-involved-in-neuron-differentiation
go-anterograde-axonal-protein-transport1	1.03682e-45	0.26908	0.816	0.924	9.8892e-42	1	go-anterograde-axonal-protein-transport
go-amide-binding	1.57645e-45	0.386454	1	0.999	1.50362e-41	1	go-amide-binding
go-neuron-projection-extension	1.91197e-45	0.404596	1	1	1.82364e-41	1	go-neuron-projection-extension
go-phagosome-maturation	3.73645e-45	0.420308	1	0.999	3.56383e-41	1	go-phagosome-maturation
go-cytoplasmic-side-of-membrane	7.86391e-45	0.3	1	1	7.5006e-41	1	go-cytoplasmic-side-of-membrane
go-regulation-of-cell-differentiation	8.46576e-45	0.324205	1	1	8.07465e-41	1	go-regulation-of-cell-differentiation
go-synaptic-vesicle-membrane1	8.94517e-45	0.534409	0.997	0.947	8.53191e-41	1	go-synaptic-vesicle-membrane
go-negative-regulation-of-protein-complex-assembly	9.70945e-45	0.334563	1	1	9.26087e-41	1	go-negative-regulation-of-protein-complex-assembly
go-antigen-processing-and-presentation-of-exogenous-peptide-antigen-via-mhc-class-i-tap-independent	1.40657e-44	0.434053	0.979	0.999	1.34159e-40	1	go-antigen-processing-and-presentation-of-exogenous-peptide-antigen-via-mhc-class-i-tap-independent
go-antigen-processing-and-presentation-of-peptide-antigen-via-mhc-class-ib	1.56551e-44	0.413349	0.979	0.998	1.49318e-40	1	go-antigen-processing-and-presentation-of-peptide-antigen-via-mhc-class-ib
go-cellular-homeostasis	2.28057e-44	0.365755	1	1	2.17521e-40	1	go-cellular-homeostasis
go-regulation-of-cellular-carbohydrate-catabolic-process	2.67732e-44	0.258036	0.935	0.994	2.55363e-40	1	go-regulation-of-cellular-carbohydrate-catabolic-process
go-positive-regulation-of-dna-binding	2.95724e-44	0.407227	1	0.999	2.82061e-40	1	go-positive-regulation-of-dna-binding
go-ubiquitin-protein-transferase-regulator-activity	8.85987e-44	0.374427	1	1	8.45055e-40	1	go-ubiquitin-protein-transferase-regulator-activity
go-ribosomal-small-subunit-assembly	2.64156e-43	0.329512	1	1	2.51952e-39	1	go-ribosomal-small-subunit-assembly
go-retrograde-axonal-transport1	2.79349e-43	0.350567	0.997	0.998	2.66443e-39	1	go-retrograde-axonal-transport
go-atpase-activity-coupled	3.36267e-43	0.289757	1	1	3.20731e-39	1	go-atpase-activity-coupled
go-leading-edge-membrane	4.47347e-43	0.304075	0.99	0.998	4.2668e-39	1	go-leading-edge-membrane
go-regulation-of-synaptic-vesicle-cycle1	6.3923e-43	0.508489	1	0.91	6.09698e-39	1	go-regulation-of-synaptic-vesicle-cycle
go-regulation-of-synaptic-vesicle-endocytosis	1.05565e-42	0.291598	0.995	0.984	1.00688e-38	1	go-regulation-of-synaptic-vesicle-endocytosis
go-regulation-of-neuron-projection-development1	1.06125e-42	0.372222	1	1	1.01222e-38	1	go-regulation-of-neuron-projection-development
go-syntaxin-1-binding1	1.40831e-42	0.435238	0.99	0.939	1.34325e-38	1	go-syntaxin-1-binding
go-telomerase-holoenzyme-complex-assembly	1.67903e-42	0.428144	0.974	0.998	1.60145e-38	1	go-telomerase-holoenzyme-complex-assembly
go-chromatin-dna-binding	2.2061e-42	0.368864	1	1	2.10418e-38	1	go-chromatin-dna-binding
go-neuron-spine	2.637e-42	0.412805	1	0.994	2.51517e-38	1	go-neuron-spine
go-atpase-activity	3.50178e-42	0.28253	1	1	3.34e-38	1	go-atpase-activity
go-proton-transporting-v-type-atpase-v1-domain	4.84655e-42	0.29437	0.933	0.99	4.62264e-38	1	go-proton-transporting-v-type-atpase-v1-domain
go-coated-vesicle-membrane	5.23508e-42	0.303957	1	1	4.99322e-38	1	go-coated-vesicle-membrane
go-modification-of-postsynaptic-actin-cytoskeleton	2.69906e-41	0.418135	0.982	0.995	2.57436e-37	1	go-modification-of-postsynaptic-actin-cytoskeleton
go-negative-regulation-of-dna-metabolic-process	3.90714e-41	0.282803	0.997	0.997	3.72663e-37	1	go-negative-regulation-of-dna-metabolic-process
go-aerobic-electron-transport-chain	4.21354e-41	0.321422	1	1	4.01887e-37	1	go-aerobic-electron-transport-chain
go-regulation-of-exocytosis	5.04729e-41	0.410137	1	0.994	4.81411e-37	1	go-regulation-of-exocytosis
go-proton-transmembrane-transport	9.09332e-41	0.441096	1	1	8.67321e-37	1	go-proton-transmembrane-transport
go-response-to-inorganic-substance	1.07117e-40	0.292842	1	1	1.02168e-36	1	go-response-to-inorganic-substance
go-developmental-cell-growth	5.05576e-40	0.385667	1	0.999	4.82218e-36	1	go-developmental-cell-growth
go-cytoskeleton-dependent-intracellular-transport	6.22829e-40	0.274134	1	1	5.94054e-36	1	go-cytoskeleton-dependent-intracellular-transport
go-plasma-membrane-bounded-cell-projection-cytoplasm	8.57982e-40	0.332522	1	1	8.18343e-36	1	go-plasma-membrane-bounded-cell-projection-cytoplasm
go-amyloid-beta-clearance	9.7191e-40	0.31473	0.997	0.999	9.27007e-36	1	go-amyloid-beta-clearance
go-positive-regulation-of-neuron-differentiation1	1.73529e-39	0.383497	1	1	1.65512e-35	1	go-positive-regulation-of-neuron-differentiation
go-posttranslational-protein-targeting-to-membrane-translocation	1.73936e-39	0.338783	0.964	0.996	1.659e-35	1	go-posttranslational-protein-targeting-to-membrane-translocation
go-actin-dependent-atpase-activity	4.90263e-39	0.422517	0.987	0.997	4.67613e-35	1	go-actin-dependent-atpase-activity
go-cellular-glucose-homeostasis	5.77857e-39	0.355645	0.997	1	5.5116e-35	1	go-cellular-glucose-homeostasis
go-negative-regulation-of-transport	1.0487e-38	0.382692	1	0.999	1.00025e-34	1	go-negative-regulation-of-transport
go-synaptic-vesicle-recycling	1.70144e-38	0.43396	1	0.999	1.62283e-34	1	go-synaptic-vesicle-recycling
go-cell-projection-organization	1.94991e-38	0.270145	1	1	1.85982e-34	1	go-cell-projection-organization
go-myelin-sheath	2.54188e-38	0.336309	1	1	2.42445e-34	1	go-myelin-sheath
go-presynaptic-endocytosis1	3.28469e-38	0.41366	1	0.995	3.13294e-34	1	go-presynaptic-endocytosis
go-regulation-of-synaptic-vesicle-recycling1	3.73061e-38	0.2985	0.995	0.986	3.55825e-34	1	go-regulation-of-synaptic-vesicle-recycling
go-regulation-of-anatomical-structure-size	5.37553e-38	0.284874	1	1	5.12718e-34	1	go-regulation-of-anatomical-structure-size
go-protein-localization-to-lysosome	6.84865e-38	0.272506	1	1	6.53224e-34	1	go-protein-localization-to-lysosome
go-chaperone-mediated-protein-complex-assembly	1.54789e-37	0.338558	1	1	1.47638e-33	1	go-chaperone-mediated-protein-complex-assembly
go-positive-regulation-of-neuron-projection-development1	1.58862e-37	0.339733	1	1	1.51523e-33	1	go-positive-regulation-of-neuron-projection-development
go-mhc-class-i-protein-complex	1.6189e-37	0.376976	0.99	0.998	1.54411e-33	1	go-mhc-class-i-protein-complex
go-cytoplasmic-region	3.91427e-37	0.257446	1	1	3.73343e-33	1	go-cytoplasmic-region
go-supercoiled-dna-binding	6.34788e-37	0.530852	0.86	0.955	6.05461e-33	1	go-supercoiled-dna-binding
go-nurf-complex	7.58148e-37	0.291839	0.808	0.956	7.23121e-33	1	go-nurf-complex
go-positive-regulation-of-axonogenesis1	1.66378e-36	0.355256	0.995	0.994	1.58691e-32	1	go-positive-regulation-of-axonogenesis
go-positive-regulation-of-nad-p-h-oxidase-activity	2.22282e-36	0.3779	0.806	0.96	2.12013e-32	1	go-positive-regulation-of-nad-p-h-oxidase-activity
go-antigen-processing-and-presentation-of-endogenous-peptide-antigen-via-mhc-class-i-via-er-pathway	9.4305e-36	0.335117	0.883	0.984	8.99481e-32	1	go-antigen-processing-and-presentation-of-endogenous-peptide-antigen-via-mhc-class-i-via-er-pathway
go-microtubule-based-process	1.06557e-35	0.2673	1	1	1.01634e-31	1	go-microtubule-based-process
go-protein-binding-involved-in-heterotypic-cell-cell-adhesion	1.56649e-35	0.287356	0.982	0.973	1.49412e-31	1	go-protein-binding-involved-in-heterotypic-cell-cell-adhesion
go-iron-ion-transport	3.79643e-35	0.332649	1	1	3.62104e-31	1	go-iron-ion-transport
go-ribosome-assembly	4.54598e-35	0.281749	1	1	4.33595e-31	1	go-ribosome-assembly
go-cell-cortex-region1	1.5162e-34	0.325259	1	0.995	1.44615e-30	1	go-cell-cortex-region
go-syntaxin-binding1	1.63737e-34	0.398283	1	0.999	1.56172e-30	1	go-syntaxin-binding
go-postsynapse-organization1	5.60425e-34	0.345968	1	0.997	5.34533e-30	1	go-postsynapse-organization
go-actin-filament-binding	5.88761e-34	0.295489	1	1	5.6156e-30	1	go-actin-filament-binding
go-golgi-associated-vesicle-membrane	1.0428e-33	0.255404	1	1	9.94624e-30	1	go-golgi-associated-vesicle-membrane
go-cis-golgi-network	1.28977e-33	0.264238	0.997	0.998	1.23018e-29	1	go-cis-golgi-network
go-protein-refolding	3.5709e-33	0.285603	1	1	3.40593e-29	1	go-protein-refolding
go-axon-extension	3.79089e-33	0.321096	0.997	1	3.61575e-29	1	go-axon-extension
go-positive-regulation-of-dna-biosynthetic-process	3.97125e-33	0.268121	1	1	3.78778e-29	1	go-positive-regulation-of-dna-biosynthetic-process
go-neuron-apoptotic-process	4.8673e-33	0.300517	1	1	4.64243e-29	1	go-neuron-apoptotic-process
go-positive-regulation-of-axon-extension	8.63651e-33	0.323908	0.997	1	8.2375e-29	1	go-positive-regulation-of-axon-extension
go-negative-regulation-of-ubiquitin-protein-transferase-activity	1.12572e-32	0.269784	1	0.999	1.07371e-28	1	go-negative-regulation-of-ubiquitin-protein-transferase-activity
go-negative-regulation-of-rna-catabolic-process	1.23995e-32	0.294199	1	1	1.18267e-28	1	go-negative-regulation-of-rna-catabolic-process
go-negative-regulation-of-protein-polymerization	1.87048e-32	0.354059	1	1	1.78406e-28	1	go-negative-regulation-of-protein-polymerization
go-site-of-polarized-growth	2.54616e-32	0.282079	1	1	2.42853e-28	1	go-site-of-polarized-growth
go-positive-regulation-of-telomerase-activity	2.99596e-32	0.272908	1	1	2.85754e-28	1	go-positive-regulation-of-telomerase-activity
go-positive-regulation-of-cell-differentiation	3.26559e-32	0.362796	0.997	1	3.11472e-28	1	go-positive-regulation-of-cell-differentiation
go-developmental-growth-involved-in-morphogenesis	3.59047e-32	0.351414	1	0.999	3.42459e-28	1	go-developmental-growth-involved-in-morphogenesis
go-nucleosome-binding	5.71987e-32	0.292254	1	1	5.45561e-28	1	go-nucleosome-binding
go-platelet-degranulation	1.29994e-31	0.322831	1	1	1.23988e-27	1	go-platelet-degranulation
go-positive-regulation-of-insulin-secretion1	2.3137e-31	0.320121	0.995	0.994	2.20681e-27	1	go-positive-regulation-of-insulin-secretion
go-intrinsic-apoptotic-signaling-pathway-in-response-to-hypoxia	3.47484e-31	0.35426	0.935	0.994	3.3143e-27	1	go-intrinsic-apoptotic-signaling-pathway-in-response-to-hypoxia
go-polyamine-transport	4.47759e-31	0.313405	0.775	0.963	4.27073e-27	1	go-polyamine-transport
go-microtubule1	6.38927e-31	0.27667	1	1	6.09409e-27	1	go-microtubule
go-tau-protein-binding	1.06668e-30	0.300911	1	1	1.0174e-26	1	go-tau-protein-binding
go-neuron-neuron-synaptic-transmission	1.26368e-30	0.328386	0.811	0.962	1.2053e-26	1	go-neuron-neuron-synaptic-transmission
go-vesicle-localization	1.67673e-30	0.308672	1	1	1.59927e-26	1	go-vesicle-localization
go-mitotic-spindle-organization	1.68922e-30	0.261384	1	1	1.61118e-26	1	go-mitotic-spindle-organization
go-microtubule-cytoskeleton-organization1	3.0221e-30	0.274007	1	1	2.88247e-26	1	go-microtubule-cytoskeleton-organization
go-activating-transcription-factor-binding	3.56631e-30	0.272416	1	1	3.40155e-26	1	go-activating-transcription-factor-binding
go-regulation-of-nuclear-transcribed-mrna-poly-a-tail-shortening	6.33298e-30	0.326495	0.982	0.999	6.04039e-26	1	go-regulation-of-nuclear-transcribed-mrna-poly-a-tail-shortening
go-atp-dependent-protein-binding	1.09286e-29	0.270365	0.899	0.963	1.04237e-25	1	go-atp-dependent-protein-binding
go-signal-peptidase-complex	6.33995e-29	0.347937	0.909	0.99	6.04705e-25	1	go-signal-peptidase-complex
go-positive-regulation-of-oxidative-stress-induced-intrinsic-apoptotic-signaling-pathway	1.71591e-28	0.412064	0.87	0.98	1.63664e-24	1	go-positive-regulation-of-oxidative-stress-induced-intrinsic-apoptotic-signaling-pathway
go-nucleotide-excision-repair-dna-duplex-unwinding	2.16363e-28	0.266703	1	1	2.06367e-24	1	go-nucleotide-excision-repair-dna-duplex-unwinding
go-microtubule-associated-complex	4.87395e-28	0.302465	1	1	4.64878e-24	1	go-microtubule-associated-complex
go-proton-exporting-atpase-activity1	6.38815e-28	0.305079	1	0.999	6.09301e-24	1	go-proton-exporting-atpase-activity
go-neuron-projection-organization1	1.01057e-27	0.300612	1	1	9.6388e-24	1	go-neuron-projection-organization
go-negative-regulation-of-neuron-death	2.76822e-27	0.253511	0.997	0.999	2.64033e-23	1	go-negative-regulation-of-neuron-death
go-protein-transport-along-microtubule	2.31177e-26	0.299313	1	0.999	2.20496e-22	1	go-protein-transport-along-microtubule
go-positive-regulation-of-intrinsic-apoptotic-signaling-pathway	2.40202e-26	0.269854	1	1	2.29104e-22	1	go-positive-regulation-of-intrinsic-apoptotic-signaling-pathway
go-axonal-transport1	3.80331e-26	0.25631	1	1	3.6276e-22	1	go-axonal-transport
go-cell-morphogenesis-involved-in-differentiation	4.5303e-26	0.266526	1	1	4.321e-22	1	go-cell-morphogenesis-involved-in-differentiation
go-dendrite-cytoplasm	5.21889e-26	0.256965	1	0.999	4.97777e-22	1	go-dendrite-cytoplasm
go-transferrin-transport	1.43113e-25	0.26368	1	1	1.36501e-21	1	go-transferrin-transport
go-negative-regulation-of-supramolecular-fiber-organization	1.8862e-25	0.253266	1	1	1.79906e-21	1	go-negative-regulation-of-supramolecular-fiber-organization
go-glycolytic-process-through-fructose-6-phosphate	2.98196e-25	0.268615	1	1	2.84419e-21	1	go-glycolytic-process-through-fructose-6-phosphate
go-modification-of-synaptic-structure	9.88593e-25	0.282424	1	1	9.4292e-21	1	go-modification-of-synaptic-structure
go-developmental-growth	1.31402e-24	0.285168	0.995	0.999	1.25331e-20	1	go-developmental-growth
go-insulin-secretion-involved-in-cellular-response-to-glucose-stimulus	3.09792e-24	0.288517	1	0.997	2.95479e-20	1	go-insulin-secretion-involved-in-cellular-response-to-glucose-stimulus
go-cellular-response-to-carbohydrate-stimulus	5.62212e-24	0.267141	0.997	1	5.36238e-20	1	go-cellular-response-to-carbohydrate-stimulus
go-embryonic-retina-morphogenesis-in-camera-type-eye1	1.00927e-23	0.295577	0.801	0.913	9.6264e-20	1	go-embryonic-retina-morphogenesis-in-camera-type-eye
go-cell-adhesion-mediator-activity	1.31767e-22	0.263052	0.997	0.998	1.25679e-18	1	go-cell-adhesion-mediator-activity
go-sequence-specific-dna-binding	3.54181e-22	0.289303	0.995	0.999	3.37818e-18	1	go-sequence-specific-dna-binding
go-snare-binding1	3.90532e-22	0.319562	1	0.999	3.72489e-18	1	go-snare-binding
go-regulation-of-dendritic-spine-development1	1.291e-21	0.255014	0.995	0.999	1.23136e-17	1	go-regulation-of-dendritic-spine-development
go-cell-cell-adhesion-mediator-activity	2.00717e-21	0.250575	0.995	0.995	1.91444e-17	1	go-cell-cell-adhesion-mediator-activity
go-microtubule-binding1	2.86783e-21	0.274051	1	1	2.73533e-17	1	go-microtubule-binding
go-negative-regulation-of-hypoxia-induced-intrinsic-apoptotic-signaling-pathway	6.53146e-14	0.36287	0.725	0.957	6.22971e-10	1	go-negative-regulation-of-hypoxia-induced-intrinsic-apoptotic-signaling-pathway
go-translocon-complex	6.98356e-14	0.250259	0.873	0.98	6.66092e-10	1	go-translocon-complex
go-postsynaptic-actin-cytoskeleton	1.06387e-13	0.304378	0.653	0.82	1.01472e-09	1	go-postsynaptic-actin-cytoskeleton
go-rs-domain-binding	7.49044e-11	0.279656	0.832	0.972	7.14438e-07	1	go-rs-domain-binding
go-negative-regulation-of-type-b-pancreatic-cell-apoptotic-process1	2.61033e-10	0.259897	0.813	0.943	2.48973e-06	1	go-negative-regulation-of-type-b-pancreatic-cell-apoptotic-process
go-retrograde-neuronal-dense-core-vesicle-transport	4.80475e-10	0.303857	0.676	0.889	4.58277e-06	1	go-retrograde-neuronal-dense-core-vesicle-transport
go-negative-regulation-of-synaptic-vesicle-transport	6.39557e-10	0.279528	0.738	0.89	6.1001e-06	1	go-negative-regulation-of-synaptic-vesicle-transport
go-transcription-factor-ap-1-complex	1.29715e-09	0.312003	0.764	0.924	1.23723e-05	1	go-transcription-factor-ap-1-complex
go-meiotic-cytokinesis	3.83454e-09	0.282238	0.63	0.822	3.65739e-05	1	go-meiotic-cytokinesis
go-double-stranded-methylated-dna-binding	5.78812e-09	0.267145	0.611	0.792	5.52071e-05	1	go-double-stranded-methylated-dna-binding
go-wd40-repeat-domain-binding	0.000226904	0.300077	0.645	0.944	1	1	go-wd40-repeat-domain-binding
go-cul5-ring-ubiquitin-ligase-complex	0.00835371	0.274656	0.438	0.837	1	1	go-cul5-ring-ubiquitin-ligase-complex
go-intrinsic-component-of-organelle-membrane	1.37682e-84	0.379875	1	1	1.31321e-80	2	go-intrinsic-component-of-organelle-membrane
go-organophosphate-biosynthetic-process	1.90583e-54	0.362896	1	1	1.81778e-50	2	go-organophosphate-biosynthetic-process
go-mitochondrial-part	2.19666e-53	0.298007	1	1	2.09518e-49	2	go-mitochondrial-part
go-organelle-inner-membrane	8.63033e-53	0.308733	1	1	8.23161e-49	2	go-organelle-inner-membrane
go-mitochondrial-envelope	1.78649e-51	0.260802	1	1	1.70396e-47	2	go-mitochondrial-envelope
go-endoplasmic-reticulum-to-golgi-vesicle-mediated-transport	1.53934e-47	0.253941	1	1	1.46823e-43	2	go-endoplasmic-reticulum-to-golgi-vesicle-mediated-transport
go-mitochondrion	5.02712e-47	0.251271	1	1	4.79487e-43	2	go-mitochondrion
go-coated-membrane	1.96964e-43	0.257484	1	1	1.87864e-39	2	go-coated-membrane
go-mitochondrial-protein-complex	1.10945e-42	0.287257	1	0.999	1.0582e-38	2	go-mitochondrial-protein-complex
go-membrane-lipid-metabolic-process	1.02038e-41	0.544166	1	0.992	9.73237e-38	2	go-membrane-lipid-metabolic-process
go-intrinsic-component-of-golgi-membrane	3.66647e-40	0.554299	1	0.987	3.49707e-36	2	go-intrinsic-component-of-golgi-membrane
go-transferase-activity-transferring-acyl-groups	4.37438e-38	0.399159	1	1	4.17228e-34	2	go-transferase-activity-transferring-acyl-groups
go-attachment-of-gpi-anchor-to-protein	4.58226e-38	0.479919	0.973	0.708	4.37056e-34	2	go-attachment-of-gpi-anchor-to-protein
go-phospholipid-biosynthetic-process	5.94141e-36	0.305826	1	0.999	5.66692e-32	2	go-phospholipid-biosynthetic-process
go-mitochondrial-respiratory-chain-complex-assembly	6.22436e-36	0.270295	1	1	5.9368e-32	2	go-mitochondrial-respiratory-chain-complex-assembly
go-intrinsic-component-of-mitochondrial-membrane	6.95697e-35	0.322002	1	1	6.63556e-31	2	go-intrinsic-component-of-mitochondrial-membrane
go-mitochondrial-matrix	1.91794e-34	0.308324	1	1	1.82934e-30	2	go-mitochondrial-matrix
go-phosphoric-ester-hydrolase-activity1	2.43794e-33	0.442345	1	0.998	2.32531e-29	2	go-phosphoric-ester-hydrolase-activity
go-nucleoside-phosphate-biosynthetic-process	4.41827e-33	0.418008	1	0.994	4.21414e-29	2	go-nucleoside-phosphate-biosynthetic-process
go-phosphatase-activity	3.54719e-32	0.380227	1	1	3.38331e-28	2	go-phosphatase-activity
go-glycerolipid-biosynthetic-process	7.33408e-32	0.371669	1	0.999	6.99525e-28	2	go-glycerolipid-biosynthetic-process
go-vesicle-localization1	9.51953e-32	0.306747	1	1	9.07973e-28	2	go-vesicle-localization
go-hydrolase-activity-acting-on-ester-bonds	5.11695e-31	0.398189	1	0.996	4.88055e-27	2	go-hydrolase-activity-acting-on-ester-bonds
go-mannose-metabolic-process	5.81639e-31	0.302468	0.928	0.621	5.54767e-27	2	go-mannose-metabolic-process
go-stat-family-protein-binding	6.63372e-31	0.367634	0.946	0.706	6.32724e-27	2	go-stat-family-protein-binding
go-carbohydrate-metabolic-process	1.17997e-30	0.290579	1	1	1.12546e-26	2	go-carbohydrate-metabolic-process
go-protein-serine-threonine-phosphatase-complex	7.24451e-30	0.290839	1	0.998	6.90981e-26	2	go-protein-serine-threonine-phosphatase-complex
go-ribose-phosphate-biosynthetic-process	4.33479e-29	0.36102	1	0.998	4.13452e-25	2	go-ribose-phosphate-biosynthetic-process
go-ncrna-transcription	1.01351e-28	0.322106	1	0.998	9.66686e-25	2	go-ncrna-transcription
go-phosphatidylinositol-biosynthetic-process	1.06327e-28	0.380062	1	0.999	1.01414e-24	2	go-phosphatidylinositol-biosynthetic-process
go-snare-complex1	2.01321e-26	0.332587	1	0.998	1.9202e-22	2	go-snare-complex
go-coenzyme-metabolic-process	4.49101e-26	0.388354	1	0.995	4.28353e-22	2	go-coenzyme-metabolic-process
go-nucleobase-containing-small-molecule-metabolic-process	6.44284e-26	0.2906	1	0.999	6.14518e-22	2	go-nucleobase-containing-small-molecule-metabolic-process
go-lipid-modification	1.9087e-25	0.385177	1	0.996	1.82052e-21	2	go-lipid-modification
go-mitochondrial-gene-expression	2.44891e-25	0.316827	1	0.998	2.33577e-21	2	go-mitochondrial-gene-expression
go-membrane-lipid-biosynthetic-process	4.68224e-25	0.679144	1	0.922	4.46592e-21	2	go-membrane-lipid-biosynthetic-process
go-rna-polymerase-complex	8.56334e-25	0.323226	1	0.997	8.16771e-21	2	go-rna-polymerase-complex
go-cytochrome-complex-assembly	1.43631e-24	0.495793	1	0.988	1.36995e-20	2	go-cytochrome-complex-assembly
go-organellar-ribosome	4.69331e-24	0.316209	1	0.997	4.47648e-20	2	go-organellar-ribosome
go-clathrin-binding1	8.60058e-24	0.455149	1	0.984	8.20323e-20	2	go-clathrin-binding
go-intrinsic-component-of-mitochondrial-inner-membrane	1.69398e-23	0.504411	1	0.983	1.61572e-19	2	go-intrinsic-component-of-mitochondrial-inner-membrane
go-purine-containing-compound-biosynthetic-process	4.0047e-23	0.423841	1	0.992	3.81969e-19	2	go-purine-containing-compound-biosynthetic-process
go-negative-regulation-of-inclusion-body-assembly	5.46304e-23	0.509694	0.997	0.94	5.21065e-19	2	go-negative-regulation-of-inclusion-body-assembly
go-sphingomyelin-biosynthetic-process	5.83249e-23	0.347192	0.907	0.685	5.56303e-19	2	go-sphingomyelin-biosynthetic-process
go-translational-termination	9.69234e-23	0.298718	1	0.999	9.24456e-19	2	go-translational-termination
go-cullin-ring-ubiquitin-ligase-complex1	1.68437e-22	0.263639	1	1	1.60655e-18	2	go-cullin-ring-ubiquitin-ligase-complex
go-peptidyl-proline-modification	1.98976e-22	0.353383	1	0.998	1.89783e-18	2	go-peptidyl-proline-modification
go-mitochondrial-translational-termination	2.06539e-22	0.309161	1	0.997	1.96997e-18	2	go-mitochondrial-translational-termination
go-leucine-binding	2.27691e-22	0.363939	0.985	0.786	2.17172e-18	2	go-leucine-binding
go-trna-metabolic-process	2.83855e-22	0.34671	1	0.997	2.7074e-18	2	go-trna-metabolic-process
go-mitochondrial-translation	2.98561e-22	0.29509	1	0.999	2.84768e-18	2	go-mitochondrial-translation
go-organelle-fusion	4.72975e-22	0.250253	1	1	4.51124e-18	2	go-organelle-fusion
go-cellular-carbohydrate-metabolic-process	5.10236e-22	0.352914	1	0.996	4.86663e-18	2	go-cellular-carbohydrate-metabolic-process
go-regulation-of-inclusion-body-assembly	6.9126e-22	0.442017	1	0.989	6.59323e-18	2	go-regulation-of-inclusion-body-assembly
go-intraciliary-transport	1.18132e-21	0.415253	1	0.985	1.12674e-17	2	go-intraciliary-transport
go-snare-binding2	1.24171e-21	0.304198	1	0.999	1.18435e-17	2	go-snare-binding
go-coenzyme-biosynthetic-process	4.77395e-21	0.361906	1	0.993	4.5534e-17	2	go-coenzyme-biosynthetic-process
go-phosphoprotein-phosphatase-activity	5.47907e-21	0.30591	1	0.999	5.22593e-17	2	go-phosphoprotein-phosphatase-activity
go-catalytic-activity-acting-on-rna	9.24567e-21	0.253528	1	1	8.81852e-17	2	go-catalytic-activity-acting-on-rna
go-nucleotide-transmembrane-transport	1.71963e-20	0.315909	0.91	0.698	1.64018e-16	2	go-nucleotide-transmembrane-transport
go-rna-polymerase-ii-holoenzyme	1.87875e-20	0.259444	1	1	1.79195e-16	2	go-rna-polymerase-ii-holoenzyme
go-protein-peptidyl-prolyl-isomerization	2.54349e-20	0.369612	1	0.998	2.42598e-16	2	go-protein-peptidyl-prolyl-isomerization
go-methylosome	2.96955e-20	0.332033	1	0.978	2.83235e-16	2	go-methylosome
go-organophosphate-catabolic-process	3.49549e-20	0.558138	0.997	0.97	3.334e-16	2	go-organophosphate-catabolic-process
go-oxidoreductase-activity-acting-on-a-sulfur-group-of-donors	3.56666e-20	0.261409	1	1	3.40188e-16	2	go-oxidoreductase-activity-acting-on-a-sulfur-group-of-donors
go-monosaccharide-metabolic-process	4.04419e-20	0.388058	1	0.994	3.85735e-16	2	go-monosaccharide-metabolic-process
go-oxidoreductase-activity-acting-on-a-sulfur-group-of-donors-oxygen-as-acceptor	9.7672e-20	0.43398	0.964	0.776	9.31596e-16	2	go-oxidoreductase-activity-acting-on-a-sulfur-group-of-donors-oxygen-as-acceptor
go-dna-templated-transcription-termination	1.24075e-19	0.263869	1	0.997	1.18343e-15	2	go-dna-templated-transcription-termination
go-carbohydrate-derivative-biosynthetic-process	4.03567e-19	0.266789	1	0.998	3.84922e-15	2	go-carbohydrate-derivative-biosynthetic-process
go-cellular-lipid-metabolic-process	5.85407e-19	0.307251	1	0.997	5.58361e-15	2	go-cellular-lipid-metabolic-process
go-intraciliary-transport-involved-in-cilium-assembly	5.9312e-19	0.366788	1	0.988	5.65718e-15	2	go-intraciliary-transport-involved-in-cilium-assembly
go-nucleoside-bisphosphate-biosynthetic-process	7.41219e-19	0.282103	1	0.998	7.06975e-15	2	go-nucleoside-bisphosphate-biosynthetic-process
go-lipid-oxidation	1.30566e-18	0.367735	1	0.989	1.24534e-14	2	go-lipid-oxidation
go-glucose-metabolic-process	1.5405e-18	0.374713	1	0.994	1.46933e-14	2	go-glucose-metabolic-process
go-snrna-transcription	2.88185e-18	0.326325	1	0.996	2.74871e-14	2	go-snrna-transcription
go-cellular-response-to-leucine	4.258e-18	0.470139	0.994	0.929	4.06128e-14	2	go-cellular-response-to-leucine
go-myosin-v-binding	6.9758e-18	0.297957	1	1	6.65351e-14	2	go-myosin-v-binding
go-regulation-of-carbohydrate-metabolic-process	1.16846e-17	0.255061	1	1	1.11448e-13	2	go-regulation-of-carbohydrate-metabolic-process
go-tethering-complex1	1.17636e-17	0.289454	1	0.999	1.12202e-13	2	go-tethering-complex
go-glycerophospholipid-metabolic-process	1.21259e-17	0.326952	1	0.998	1.15657e-13	2	go-glycerophospholipid-metabolic-process
go-catalytic-activity-acting-on-a-trna	1.26576e-17	0.365033	1	0.988	1.20728e-13	2	go-catalytic-activity-acting-on-a-trna
go-vesicle-docking1	1.36539e-17	0.26721	1	0.999	1.30231e-13	2	go-vesicle-docking
go-syntaxin-binding2	1.47641e-17	0.285844	1	0.999	1.4082e-13	2	go-syntaxin-binding
go-copii-vesicle-coat	1.54491e-17	0.269245	1	0.995	1.47354e-13	2	go-copii-vesicle-coat
go-transcription-by-rna-polymerase-iii	1.56793e-17	0.511228	1	0.975	1.49549e-13	2	go-transcription-by-rna-polymerase-iii
go-picln-sm-protein-complex	3.07837e-17	0.325891	0.991	0.854	2.93615e-13	2	go-picln-sm-protein-complex
go-negative-regulation-of-synaptic-vesicle-transport1	4.86083e-17	0.30992	0.991	0.839	4.63626e-13	2	go-negative-regulation-of-synaptic-vesicle-transport
go-endoplasmic-reticulum-palmitoyltransferase-complex	5.31063e-17	0.359396	0.973	0.813	5.06528e-13	2	go-endoplasmic-reticulum-palmitoyltransferase-complex
go-termination-of-rna-polymerase-ii-transcription	7.92639e-17	0.287592	1	0.994	7.56019e-13	2	go-termination-of-rna-polymerase-ii-transcription
go-tricarboxylic-acid-cycle	8.89876e-17	0.270425	1	0.996	8.48764e-13	2	go-tricarboxylic-acid-cycle
go-organellar-large-ribosomal-subunit	1.0612e-16	0.294992	1	0.992	1.01217e-12	2	go-organellar-large-ribosomal-subunit
go-dynactin-complex	1.97247e-16	0.313666	1	0.946	1.88134e-12	2	go-dynactin-complex
go-c3hc4-type-ring-finger-domain-binding1	2.58101e-16	0.325742	0.997	0.938	2.46177e-12	2	go-c3hc4-type-ring-finger-domain-binding
go-cofactor-biosynthetic-process	5.25069e-16	0.266108	1	0.997	5.00811e-12	2	go-cofactor-biosynthetic-process
go-lipoprotein-biosynthetic-process	5.71104e-16	0.50914	1	0.958	5.44719e-12	2	go-lipoprotein-biosynthetic-process
go-histone-mrna-metabolic-process	6.03341e-16	0.306005	1	0.988	5.75466e-12	2	go-histone-mrna-metabolic-process
go-mannosidase-activity	1.44005e-15	0.426051	0.997	0.978	1.37352e-11	2	go-mannosidase-activity
go-nucleoside-phosphate-metabolic-process	3.55964e-15	0.252099	1	0.999	3.39519e-11	2	go-nucleoside-phosphate-metabolic-process
go-fatty-acid-beta-oxidation	4.72742e-15	0.32534	1	0.989	4.50901e-11	2	go-fatty-acid-beta-oxidation
go-nucleotidyltransferase-activity	6.95633e-15	0.407707	1	0.981	6.63495e-11	2	go-nucleotidyltransferase-activity
go-positive-regulation-of-ubiquitin-protein-transferase-activity	2.1981e-14	0.352214	1	0.996	2.09655e-10	2	go-positive-regulation-of-ubiquitin-protein-transferase-activity
go-nucleic-acid-phosphodiester-bond-hydrolysis	3.10521e-14	0.251046	1	0.999	2.96175e-10	2	go-nucleic-acid-phosphodiester-bond-hydrolysis
go-rna-capping	4.44521e-14	0.378856	0.997	0.984	4.23984e-10	2	go-rna-capping
go-protein-k11-linked-ubiquitination	4.92175e-14	0.250989	1	0.999	4.69436e-10	2	go-protein-k11-linked-ubiquitination
go-fatty-acid-catabolic-process	5.17707e-14	0.31396	1	0.985	4.93789e-10	2	go-fatty-acid-catabolic-process
go-cellular-lipid-catabolic-process	5.38955e-14	0.321965	1	0.994	5.14055e-10	2	go-cellular-lipid-catabolic-process
go-cis-trans-isomerase-activity	5.49061e-14	0.385018	1	0.991	5.23694e-10	2	go-cis-trans-isomerase-activity
go-organellar-small-ribosomal-subunit	9.60634e-14	0.330126	1	0.987	9.16252e-10	2	go-organellar-small-ribosomal-subunit
go-microbody	1.00405e-13	0.250832	1	0.999	9.57664e-10	2	go-microbody
go-ap-type-membrane-coat-adaptor-complex	1.02797e-13	0.284584	1	0.996	9.80477e-10	2	go-ap-type-membrane-coat-adaptor-complex
go-regulation-of-microtubule-nucleation1	1.2842e-13	0.26473	0.964	0.801	1.22487e-09	2	go-regulation-of-microtubule-nucleation
go-monocarboxylic-acid-catabolic-process	1.32599e-13	0.345903	1	0.981	1.26473e-09	2	go-monocarboxylic-acid-catabolic-process
go-ribbon-synapse	1.33521e-13	0.284464	0.982	0.759	1.27353e-09	2	go-ribbon-synapse
go-ciliary-basal-body	1.44903e-13	0.501857	0.997	0.924	1.38209e-09	2	go-ciliary-basal-body
go-exocytic-process1	2.41362e-13	0.346776	1	0.992	2.30211e-09	2	go-exocytic-process
go-pancreatic-a-cell-differentiation1	2.58502e-13	0.2553	1	0.817	2.46559e-09	2	go-pancreatic-a-cell-differentiation
go-microtubule-organizing-center-part	2.67311e-13	0.385202	1	0.965	2.54962e-09	2	go-microtubule-organizing-center-part
go-presynaptic-endocytosis2	3.24387e-13	0.304208	1	0.995	3.094e-09	2	go-presynaptic-endocytosis
go-oxidoreductase-activity-acting-on-the-aldehyde-or-oxo-group-of-donors-disulfide-as-acceptor	4.72308e-13	0.324723	0.982	0.832	4.50488e-09	2	go-oxidoreductase-activity-acting-on-the-aldehyde-or-oxo-group-of-donors-disulfide-as-acceptor
go-synaptic-vesicle-recycling1	4.75059e-13	0.280043	1	0.999	4.53111e-09	2	go-synaptic-vesicle-recycling
go-regulation-of-synaptic-vesicle-cycle2	5.53627e-13	0.342537	1	0.912	5.2805e-09	2	go-regulation-of-synaptic-vesicle-cycle
go-mitochondrial-acetyl-coa-biosynthetic-process-from-pyruvate	6.76979e-13	0.289791	0.988	0.89	6.45702e-09	2	go-mitochondrial-acetyl-coa-biosynthetic-process-from-pyruvate
go-endosome-to-lysosome-transport	7.95827e-13	0.252394	1	0.998	7.5906e-09	2	go-endosome-to-lysosome-transport
go-scf-ubiquitin-ligase-complex1	8.23961e-13	0.297097	1	0.995	7.85894e-09	2	go-scf-ubiquitin-ligase-complex
go-branched-chain-amino-acid-catabolic-process	8.78596e-13	0.368015	0.994	0.975	8.38005e-09	2	go-branched-chain-amino-acid-catabolic-process
go-voluntary-musculoskeletal-movement	9.22236e-13	0.286457	0.97	0.796	8.79629e-09	2	go-voluntary-musculoskeletal-movement
go-regulation-of-rac-protein-signal-transduction1	1.86343e-12	0.382078	1	0.965	1.77734e-08	2	go-regulation-of-rac-protein-signal-transduction
go-rna-polymerase-iii-complex	1.91852e-12	0.49183	0.976	0.916	1.82989e-08	2	go-rna-polymerase-iii-complex
go-syntaxin-1-binding2	2.11518e-12	0.321804	1	0.938	2.01746e-08	2	go-syntaxin-1-binding
go-exocytic-vesicle2	3.04515e-12	0.33042	1	1	2.90446e-08	2	go-exocytic-vesicle
go-regulation-of-translational-fidelity	3.33123e-12	0.331762	1	0.988	3.17733e-08	2	go-regulation-of-translational-fidelity
go-rna-polymerase-ii-repressing-transcription-factor-binding	5.52287e-12	0.297791	1	0.994	5.26772e-08	2	go-rna-polymerase-ii-repressing-transcription-factor-binding
go-hsp70-protein-binding	9.20954e-12	0.291072	1	0.997	8.78406e-08	2	go-hsp70-protein-binding
go-phosphatidylinositol-metabolic-process	1.97402e-11	0.419461	1	0.981	1.88282e-07	2	go-phosphatidylinositol-metabolic-process
go-synaptic-vesicle-localization2	1.99268e-11	0.351932	1	0.991	1.90061e-07	2	go-synaptic-vesicle-localization
go-rna-polymerase-iii-activity	2.20215e-11	0.482197	0.985	0.929	2.10041e-07	2	go-rna-polymerase-iii-activity
go-microbody-part	2.25655e-11	0.276643	1	0.998	2.1523e-07	2	go-microbody-part
go-regulation-of-clathrin-dependent-endocytosis1	2.42797e-11	0.346568	0.997	0.969	2.3158e-07	2	go-regulation-of-clathrin-dependent-endocytosis
go-respiratory-chain-complex-iv-assembly	2.64292e-11	0.453882	0.997	0.954	2.52082e-07	2	go-respiratory-chain-complex-iv-assembly
go-dihydrolipoyl-dehydrogenase-complex	3.08273e-11	0.364878	0.976	0.842	2.94031e-07	2	go-dihydrolipoyl-dehydrogenase-complex
go-snap-receptor-activity	3.10245e-11	0.320624	1	0.993	2.95912e-07	2	go-snap-receptor-activity
go-glycerolipid-metabolic-process	3.45422e-11	0.283381	1	0.999	3.29463e-07	2	go-glycerolipid-metabolic-process
go-cdc73-paf1-complex	4.57706e-11	0.305893	0.991	0.892	4.3656e-07	2	go-cdc73-paf1-complex
go-glucan-metabolic-process	4.7379e-11	0.417403	1	0.978	4.51901e-07	2	go-glucan-metabolic-process
go-insulin-secretion-involved-in-cellular-response-to-glucose-stimulus1	5.43118e-11	0.261848	1	0.997	5.18026e-07	2	go-insulin-secretion-involved-in-cellular-response-to-glucose-stimulus
go-regulation-of-sodium-ion-transmembrane-transport	6.2872e-11	0.335597	1	0.984	5.99673e-07	2	go-regulation-of-sodium-ion-transmembrane-transport
go-regulation-of-sodium-ion-transport1	8.5677e-11	0.310554	1	0.985	8.17188e-07	2	go-regulation-of-sodium-ion-transport
go-organic-acid-catabolic-process	1.01688e-10	0.346491	0.997	0.97	9.69896e-07	2	go-organic-acid-catabolic-process
go-regulation-of-exocytosis1	1.24854e-10	0.262946	1	0.994	1.19086e-06	2	go-regulation-of-exocytosis
go-atp-dependent-protein-binding1	2.93548e-10	0.260074	1	0.943	2.79986e-06	2	go-atp-dependent-protein-binding
go-regulation-of-cholesterol-biosynthetic-process	3.14636e-10	0.270677	1	0.993	3.001e-06	2	go-regulation-of-cholesterol-biosynthetic-process
go-acetyl-coa-biosynthetic-process-from-pyruvate	3.64879e-10	0.288281	1	0.986	3.48022e-06	2	go-acetyl-coa-biosynthetic-process-from-pyruvate
go-trans-golgi-network-membrane	4.40665e-10	0.270913	1	0.998	4.20306e-06	2	go-trans-golgi-network-membrane
go-vesicle-docking-involved-in-exocytosis1	4.58816e-10	0.25789	1	0.993	4.37618e-06	2	go-vesicle-docking-involved-in-exocytosis
go-protein-quality-control-for-misfolded-or-incompletely-synthesized-proteins	4.86364e-10	0.253162	1	0.994	4.63894e-06	2	go-protein-quality-control-for-misfolded-or-incompletely-synthesized-proteins
go-synaptic-vesicle-exocytosis2	6.65149e-10	0.293915	1	0.889	6.34419e-06	2	go-synaptic-vesicle-exocytosis
go-vesicle-mediated-transport-in-synapse2	7.61865e-10	0.279401	1	1	7.26667e-06	2	go-vesicle-mediated-transport-in-synapse
go-u7-snrnp	8.1567e-10	0.264599	0.988	0.867	7.77986e-06	2	go-u7-snrnp
go-presynapse2	9.65777e-10	0.333015	1	0.985	9.21158e-06	2	go-presynapse
go-response-to-misfolded-protein	1.29584e-09	0.255763	1	0.994	1.23597e-05	2	go-response-to-misfolded-protein
go-intrinsic-component-of-synaptic-vesicle-membrane1	1.60547e-09	0.268348	1	0.925	1.5313e-05	2	go-intrinsic-component-of-synaptic-vesicle-membrane
go-mitotic-nuclear-envelope-reassembly	2.03846e-09	0.298232	0.994	0.964	1.94429e-05	2	go-mitotic-nuclear-envelope-reassembly
go-intracellular-lipid-transport	2.08152e-09	0.318755	1	0.991	1.98535e-05	2	go-intracellular-lipid-transport
go-positive-regulation-of-dendrite-morphogenesis1	2.66073e-09	0.307431	1	0.987	2.53781e-05	2	go-positive-regulation-of-dendrite-morphogenesis
go-s-adenosylmethionine-metabolic-process	3.05123e-09	0.396442	0.997	0.952	2.91026e-05	2	go-s-adenosylmethionine-metabolic-process
go-tau-protein-kinase-activity	5.84936e-09	0.270744	1	0.992	5.57912e-05	2	go-tau-protein-kinase-activity
go-nucleobase-containing-compound-transmembrane-transporter-activity	7.14457e-09	0.358003	1	0.978	6.81449e-05	2	go-nucleobase-containing-compound-transmembrane-transporter-activity
go-cellular-response-to-leucine-starvation	8.64846e-09	0.324934	0.985	0.909	8.2489e-05	2	go-cellular-response-to-leucine-starvation
go-mitochondrion-morphogenesis	8.9474e-09	0.28093	1	0.988	8.53403e-05	2	go-mitochondrion-morphogenesis
go-ap-3-adaptor-complex	1.04025e-08	0.317538	0.997	0.9	9.92193e-05	2	go-ap-3-adaptor-complex
go-palmitoyltransferase-complex	1.2375e-08	0.359266	0.994	0.904	0.000118033	2	go-palmitoyltransferase-complex
go-energy-reserve-metabolic-process	1.53146e-08	0.378329	1	0.983	0.000146071	2	go-energy-reserve-metabolic-process
go-inclusion-body-assembly1	2.03041e-08	0.269322	1	0.993	0.00019366	2	go-inclusion-body-assembly
go-alpha-tubulin-binding1	2.30836e-08	0.308213	1	0.98	0.000220171	2	go-alpha-tubulin-binding
go-nuclear-transcribed-mrna-catabolic-process-exonucleolytic	2.56126e-08	0.282806	1	0.985	0.000244293	2	go-nuclear-transcribed-mrna-catabolic-process-exonucleolytic
go-phosphatidylinositol-monophosphate-phosphatase-activity	2.66646e-08	0.35451	0.994	0.898	0.000254327	2	go-phosphatidylinositol-monophosphate-phosphatase-activity
go-rna-polymerase-ii-activity	3.08919e-08	0.325641	1	0.959	0.000294647	2	go-rna-polymerase-ii-activity
go-inositol-phosphate-catabolic-process	3.7738e-08	0.321887	0.991	0.87	0.000359945	2	go-inositol-phosphate-catabolic-process
go-negative-regulation-of-insulin-secretion-involved-in-cellular-response-to-glucose-stimulus	4.19025e-08	0.282949	0.979	0.871	0.000399667	2	go-negative-regulation-of-insulin-secretion-involved-in-cellular-response-to-glucose-stimulus
go-glutathione-disulfide-oxidoreductase-activity	4.49972e-08	0.251406	0.97	0.854	0.000429183	2	go-glutathione-disulfide-oxidoreductase-activity
go-synaptic-vesicle-cycle2	6.03378e-08	0.308797	1	0.991	0.000575502	2	go-synaptic-vesicle-cycle
go-trna-binding	8.45497e-08	0.255069	1	0.992	0.000806435	2	go-trna-binding
go-trna-processing	9.00739e-08	0.346615	1	0.958	0.000859125	2	go-trna-processing
go-tricarboxylic-acid-cycle-enzyme-complex	9.10944e-08	0.359689	0.982	0.895	0.000868859	2	go-tricarboxylic-acid-cycle-enzyme-complex
go-nucleotide-excision-repair-preincision-complex-stabilization	1.05771e-07	0.350344	0.997	0.981	0.00100885	2	go-nucleotide-excision-repair-preincision-complex-stabilization
go-phosphorylated-carbohydrate-dephosphorylation	1.06319e-07	0.359548	0.991	0.894	0.00101407	2	go-phosphorylated-carbohydrate-dephosphorylation
go-gtpase-activating-protein-binding	1.4702e-07	0.318278	1	0.979	0.00140228	2	go-gtpase-activating-protein-binding
go-regulation-of-glucose-metabolic-process	1.65181e-07	0.379619	1	0.975	0.00157549	2	go-regulation-of-glucose-metabolic-process
go-metal-cluster-binding	1.69159e-07	0.279433	1	0.991	0.00161344	2	go-metal-cluster-binding
go-gpi-anchor-biosynthetic-process	1.81083e-07	0.296088	0.967	0.812	0.00172717	2	go-gpi-anchor-biosynthetic-process
go-synaptic-vesicle-membrane2	2.0331e-07	0.306317	1	0.948	0.00193917	2	go-synaptic-vesicle-membrane
go-histone-h2b-ubiquitination	2.82528e-07	0.353202	0.988	0.951	0.00269475	2	go-histone-h2b-ubiquitination
go-trna-transport	3.0419e-07	0.255891	1	0.989	0.00290137	2	go-trna-transport
go-positive-regulation-of-dna-templated-transcription-elongation	3.12126e-07	0.278639	1	0.986	0.00297706	2	go-positive-regulation-of-dna-templated-transcription-elongation
go-calcium-ion-regulated-exocytosis2	4.00376e-07	0.259016	1	0.925	0.00381878	2	go-calcium-ion-regulated-exocytosis
go-non-motile-cilium-assembly	4.76106e-07	0.353776	0.991	0.959	0.0045411	2	go-non-motile-cilium-assembly
go-glycosylation	8.37509e-07	0.25836	1	0.997	0.00798816	2	go-glycosylation
go-protein-retention-in-er-lumen	8.73247e-07	0.292655	1	0.936	0.00832903	2	go-protein-retention-in-er-lumen
go-palmitoyltransferase-activity	8.84819e-07	0.391006	0.997	0.922	0.00843941	2	go-palmitoyltransferase-activity
go-sphingolipid-biosynthetic-process	8.8845e-07	0.378313	0.985	0.896	0.00847403	2	go-sphingolipid-biosynthetic-process
go-er-membrane-protein-complex	1.01972e-06	0.297584	1	0.952	0.0097261	2	go-er-membrane-protein-complex
go-mitochondrial-transmembrane-transport	1.15303e-06	0.358061	1	0.977	0.0109976	2	go-mitochondrial-transmembrane-transport
go-regulation-of-retrograde-protein-transport-er-to-cytosol	1.2838e-06	0.267764	1	0.982	0.0122449	2	go-regulation-of-retrograde-protein-transport-er-to-cytosol
go-trna-modification	2.48976e-06	0.318907	0.985	0.865	0.0237473	2	go-trna-modification
go-rna-polymerase-activity	2.90508e-06	0.37223	0.988	0.91	0.0277087	2	go-rna-polymerase-activity
go-dynein-complex	3.88937e-06	0.262958	1	0.985	0.0370968	2	go-dynein-complex
go-liposaccharide-metabolic-process	5.07659e-06	0.370642	0.994	0.96	0.0484206	2	go-liposaccharide-metabolic-process
go-trna-methylation	5.19531e-06	0.301099	0.961	0.828	0.0495529	2	go-trna-methylation
go-polyol-catabolic-process	5.54766e-06	0.342238	0.997	0.949	0.0529135	2	go-polyol-catabolic-process
go-positive-regulation-of-transcription-elongation-from-rna-polymerase-ii-promoter	6.32714e-06	0.313207	0.988	0.959	0.0603483	2	go-positive-regulation-of-transcription-elongation-from-rna-polymerase-ii-promoter
go-histone-deubiquitination	9.41032e-06	0.304836	1	0.975	0.0897556	2	go-histone-deubiquitination
go-ciliary-tip	1.2008e-05	0.295541	1	0.943	0.114532	2	go-ciliary-tip
go-protein-phosphatase-type-2a-complex	1.24517e-05	0.284916	1	0.987	0.118764	2	go-protein-phosphatase-type-2a-complex
go-adenyl-nucleotide-exchange-factor-activity	1.34605e-05	0.263943	0.994	0.903	0.128386	2	go-adenyl-nucleotide-exchange-factor-activity
go-snare-complex-assembly	1.9742e-05	0.298755	0.985	0.907	0.188299	2	go-snare-complex-assembly
go-mitochondrial-respiratory-chain-complex-iv-assembly	2.03317e-05	0.367633	0.997	0.961	0.193924	2	go-mitochondrial-respiratory-chain-complex-iv-assembly
go-gamma-tubulin-complex	2.041e-05	0.303052	0.976	0.893	0.194671	2	go-gamma-tubulin-complex
go-peptidyl-serine-dephosphorylation	2.24738e-05	0.256884	1	0.996	0.214355	2	go-peptidyl-serine-dephosphorylation
go-small-molecule-catabolic-process	5.32719e-05	0.267182	0.997	0.963	0.508107	2	go-small-molecule-catabolic-process
go-regulation-of-cellular-carbohydrate-metabolic-process	5.53441e-05	0.270084	1	0.987	0.527872	2	go-regulation-of-cellular-carbohydrate-metabolic-process
go-positive-regulation-of-protein-exit-from-endoplasmic-reticulum	7.71123e-05	0.268922	0.991	0.979	0.735497	2	go-positive-regulation-of-protein-exit-from-endoplasmic-reticulum
go-negative-regulation-of-organelle-assembly	8.05282e-05	0.297081	1	0.969	0.768078	2	go-negative-regulation-of-organelle-assembly
go-rna-polymerase-ii-core-complex	0.000111103	0.315706	0.997	0.967	1	2	go-rna-polymerase-ii-core-complex
go-endoplasmic-reticulum-exit-site	0.000135722	0.255409	1	0.99	1	2	go-endoplasmic-reticulum-exit-site
go-rna-modification	0.000142523	0.308521	0.994	0.907	1	2	go-rna-modification
go-ceramide-biosynthetic-process	0.00023862	0.3159	0.976	0.913	1	2	go-ceramide-biosynthetic-process
go-dynein-heavy-chain-binding	0.000298031	0.251741	0.973	0.883	1	2	go-dynein-heavy-chain-binding
go-hydrolase-activity-acting-on-glycosyl-bonds	0.000302374	0.298723	0.958	0.863	1	2	go-hydrolase-activity-acting-on-glycosyl-bonds
go-dna-repair-complex	0.000339604	0.295008	0.997	0.952	1	2	go-dna-repair-complex
go-positive-regulation-of-receptor-recycling	0.000372436	0.291709	1	0.962	1	2	go-positive-regulation-of-receptor-recycling
go-golgi-transport-complex	0.000430625	0.280007	0.964	0.876	1	2	go-golgi-transport-complex
go-nucleobase-containing-compound-kinase-activity	0.000468399	0.287132	0.997	0.967	1	2	go-nucleobase-containing-compound-kinase-activity
go-glycogen-biosynthetic-process	0.000496749	0.318498	0.994	0.958	1	2	go-glycogen-biosynthetic-process
go-filopodium-tip	0.000524487	0.258348	0.991	0.95	1	2	go-filopodium-tip
go-phosphatidylinositol-phosphate-phosphatase-activity	0.000687203	0.289233	0.985	0.914	1	2	go-phosphatidylinositol-phosphate-phosphatase-activity
go-phosphatidylinositol-dephosphorylation	0.000713147	0.284708	0.988	0.913	1	2	go-phosphatidylinositol-dephosphorylation
go-nucleobase-containing-small-molecule-biosynthetic-process	0.000768335	0.289044	0.982	0.897	1	2	go-nucleobase-containing-small-molecule-biosynthetic-process
go-carboxy-terminal-domain-protein-kinase-complex	0.00132309	0.281116	0.994	0.942	1	2	go-carboxy-terminal-domain-protein-kinase-complex
go-prenyltransferase-activity	0.00154279	0.251251	0.997	0.975	1	2	go-prenyltransferase-activity
go-carbohydrate-derivative-transmembrane-transporter-activity	0.0021999	0.299586	0.994	0.95	1	2	go-carbohydrate-derivative-transmembrane-transporter-activity
go-termination-of-rna-polymerase-i-transcription	0.00237419	0.278938	0.997	0.959	1	2	go-termination-of-rna-polymerase-i-transcription
go-inositol-phosphate-phosphatase-activity	0.00253113	0.282112	0.991	0.95	1	2	go-inositol-phosphate-phosphatase-activity
go-transcription-elongation-factor-complex	0.00293616	0.256781	0.994	0.971	1	2	go-transcription-elongation-factor-complex
go-protein-homotetramerization	0.00626111	0.257786	0.997	0.989	1	2	go-protein-homotetramerization
go-monovalent-inorganic-cation-transport1	2.90313e-66	0.435729	1	0.715	2.76901e-62	3	go-monovalent-inorganic-cation-transport
go-respiratory-chain-complex	5.7619e-65	0.361816	1	1	5.4957e-61	3	go-respiratory-chain-complex
go-respirasome	8.79524e-65	0.359387	1	1	8.3889e-61	3	go-respirasome
go-calcium-transporting-atpase-activity1	2.0019e-60	0.363355	0.991	0.97	1.90941e-56	3	go-calcium-transporting-atpase-activity
go-cellular-response-to-calcium-ion1	2.31569e-59	0.364737	0.982	0.95	2.2087e-55	3	go-cellular-response-to-calcium-ion
go-oxidative-phosphorylation	2.81801e-59	0.345667	1	1	2.68782e-55	3	go-oxidative-phosphorylation
go-atp-synthesis-coupled-electron-transport	1.66512e-58	0.314736	1	1	1.58819e-54	3	go-atp-synthesis-coupled-electron-transport
go-u4-snrnp	6.45592e-58	0.323785	0.982	0.937	6.15766e-54	3	go-u4-snrnp
go-epithelial-cell-fate-commitment	6.79246e-58	0.26853	0.982	0.905	6.47865e-54	3	go-epithelial-cell-fate-commitment
go-chromaffin-granule1	2.87089e-57	0.353269	0.991	0.968	2.73825e-53	3	go-chromaffin-granule
go-crd-mediated-mrna-stabilization1	3.33563e-57	0.592685	0.979	0.974	3.18152e-53	3	go-crd-mediated-mrna-stabilization
go-positive-regulation-of-synaptic-transmission1	1.47283e-56	0.299514	0.997	0.692	1.40478e-52	3	go-positive-regulation-of-synaptic-transmission
go-respiratory-electron-transport-chain	4.08982e-56	0.309353	1	1	3.90087e-52	3	go-respiratory-electron-transport-chain
go-mitochondrial-respiratory-chain-complex-i	2.16208e-54	0.346963	1	0.999	2.06219e-50	3	go-mitochondrial-respiratory-chain-complex-i
go-membrane-protein-complex	4.27699e-54	0.292044	1	1	4.07939e-50	3	go-membrane-protein-complex
go-regulation-of-neurotransmitter-transport1	6.90843e-54	0.60113	1	0.757	6.58926e-50	3	go-regulation-of-neurotransmitter-transport
go-regulation-of-neurotransmitter-levels1	3.88635e-53	0.614057	1	0.961	3.7068e-49	3	go-regulation-of-neurotransmitter-levels
go-calcium-dependent-protein-binding1	2.86232e-52	0.508069	1	1	2.73008e-48	3	go-calcium-dependent-protein-binding
go-interleukin-35-mediated-signaling-pathway	5.26929e-52	0.357865	0.988	0.99	5.02585e-48	3	go-interleukin-35-mediated-signaling-pathway
go-regulation-of-cardiac-conduction1	1.21159e-50	0.25086	0.994	0.941	1.15561e-46	3	go-regulation-of-cardiac-conduction
go-regulation-of-long-term-neuronal-synaptic-plasticity	1.59471e-50	0.367824	0.988	0.941	1.52103e-46	3	go-regulation-of-long-term-neuronal-synaptic-plasticity
go-postsynaptic-actin-cytoskeleton-organization1	4.27501e-50	0.482951	1	1	4.0775e-46	3	go-postsynaptic-actin-cytoskeleton-organization
go-mitochondrial-electron-transport-nadh-to-ubiquinone	7.79042e-50	0.311948	1	0.999	7.4305e-46	3	go-mitochondrial-electron-transport-nadh-to-ubiquinone
go-transport-vesicle1	7.82449e-50	0.392127	1	1	7.463e-46	3	go-transport-vesicle
go-postsynapse1	1.15005e-49	0.500552	1	0.999	1.09692e-45	3	go-postsynapse
go-transport-vesicle-membrane1	2.69661e-49	0.445533	1	1	2.57203e-45	3	go-transport-vesicle-membrane
go-synapse-part1	4.33788e-49	0.509097	1	1	4.13747e-45	3	go-synapse-part
go-pancreatic-a-cell-differentiation2	7.76973e-49	0.580767	0.994	0.818	7.41077e-45	3	go-pancreatic-a-cell-differentiation
go-low-density-lipoprotein-particle-clearance	2.64357e-48	0.328856	0.997	0.985	2.52144e-44	3	go-low-density-lipoprotein-particle-clearance
go-postsynaptic-cytoskeleton-organization1	3.46763e-48	0.528555	1	1	3.30742e-44	3	go-postsynaptic-cytoskeleton-organization
go-regulation-of-transport1	3.56311e-48	0.346301	1	1	3.39849e-44	3	go-regulation-of-transport
go-cytoplasmic-side-of-rough-endoplasmic-reticulum-membrane1	4.21576e-48	0.304858	0.979	0.973	4.021e-44	3	go-cytoplasmic-side-of-rough-endoplasmic-reticulum-membrane
go-macrolide-binding	5.54137e-48	0.250899	0.948	0.925	5.28536e-44	3	go-macrolide-binding
go-vesicle-membrane1	9.93433e-48	0.253994	1	1	9.47536e-44	3	go-vesicle-membrane
go-synapse1	1.3071e-47	0.449624	1	1	1.24672e-43	3	go-synapse
go-wd40-repeat-domain-binding1	2.10242e-47	0.487004	0.906	0.886	2.00529e-43	3	go-wd40-repeat-domain-binding
go-cell-communication-involved-in-cardiac-conduction1	3.03278e-47	0.280874	0.985	0.921	2.89266e-43	3	go-cell-communication-involved-in-cardiac-conduction
go-channel-inhibitor-activity	9.8003e-47	0.275335	0.97	0.921	9.34753e-43	3	go-channel-inhibitor-activity
go-protein-localization-to-endoplasmic-reticulum1	1.21427e-46	0.266747	1	1	1.15817e-42	3	go-protein-localization-to-endoplasmic-reticulum
go-active-ion-transmembrane-transporter-activity1	1.01915e-45	0.42755	1	0.992	9.72066e-42	3	go-active-ion-transmembrane-transporter-activity
go-regulation-of-cell-communication-by-electrical-coupling-involved-in-cardiac-conduction1	1.44627e-45	0.289159	0.997	0.982	1.37945e-41	3	go-regulation-of-cell-communication-by-electrical-coupling-involved-in-cardiac-conduction
go-nadh-dehydrogenase-activity	1.4569e-45	0.311954	1	0.999	1.38959e-41	3	go-nadh-dehydrogenase-activity
go-inner-mitochondrial-membrane-protein-complex	1.48139e-45	0.313171	1	0.999	1.41295e-41	3	go-inner-mitochondrial-membrane-protein-complex
go-secretory-granule-organization	1.87865e-45	0.273272	0.985	0.929	1.79186e-41	3	go-secretory-granule-organization
go-negative-regulation-of-ryanodine-sensitive-calcium-release-channel-activity1	3.42876e-45	0.386857	0.991	0.992	3.27035e-41	3	go-negative-regulation-of-ryanodine-sensitive-calcium-release-channel-activity
go-neurotransmitter-transport1	9.50448e-45	0.44283	1	0.782	9.06537e-41	3	go-neurotransmitter-transport
go-dendritic-transport1	1.17501e-44	0.359215	0.994	0.969	1.12073e-40	3	go-dendritic-transport
go-heterotrimeric-g-protein-complex1	1.91096e-44	0.399883	0.997	0.939	1.82267e-40	3	go-heterotrimeric-g-protein-complex
go-negative-regulation-of-neurotransmitter-transport	2.18199e-44	0.4446	0.997	0.965	2.08118e-40	3	go-negative-regulation-of-neurotransmitter-transport
go-respiratory-chain-complex-iv1	2.35102e-44	0.453983	1	0.996	2.2424e-40	3	go-respiratory-chain-complex-iv
go-establishment-of-protein-localization-to-endoplasmic-reticulum1	2.03487e-43	0.263578	1	1	1.94086e-39	3	go-establishment-of-protein-localization-to-endoplasmic-reticulum
go-schaffer-collateral--ca1-synapse1	3.6614e-43	0.364363	0.997	0.869	3.49224e-39	3	go-schaffer-collateral--ca1-synapse
go-ficolin-1-rich-granule-membrane1	3.86367e-43	0.285209	1	0.994	3.68517e-39	3	go-ficolin-1-rich-granule-membrane
go-cotranslational-protein-targeting-to-membrane1	5.76012e-43	0.270611	1	1	5.494e-39	3	go-cotranslational-protein-targeting-to-membrane
go-vesicle-mediated-transport-in-synapse3	8.62649e-43	0.492905	1	1	8.22794e-39	3	go-vesicle-mediated-transport-in-synapse
go-golgi-associated-vesicle	1.12563e-42	0.261864	1	1	1.07363e-38	3	go-golgi-associated-vesicle
go-synaptic-vesicle-localization3	1.49e-42	0.554425	1	0.991	1.42117e-38	3	go-synaptic-vesicle-localization
go-motor-activity1	5.73299e-42	0.44091	1	0.976	5.46812e-38	3	go-motor-activity
go-primary-active-transmembrane-transporter-activity1	9.83071e-42	0.485432	1	0.997	9.37653e-38	3	go-primary-active-transmembrane-transporter-activity
go-regulation-of-neurotransmitter-secretion1	1.11631e-41	0.33779	1	0.731	1.06474e-37	3	go-regulation-of-neurotransmitter-secretion
go-transmembrane-transport1	1.96071e-41	0.456845	1	0.994	1.87013e-37	3	go-transmembrane-transport
go-neuron-part1	2.22317e-41	0.417999	1	1	2.12046e-37	3	go-neuron-part
go-phosphatidylethanolamine-binding	2.38878e-41	0.27295	0.997	0.97	2.27842e-37	3	go-phosphatidylethanolamine-binding
go-proton-transmembrane-transport1	3.98902e-41	0.456753	1	1	3.80473e-37	3	go-proton-transmembrane-transport
go-protein-transport-within-plasma-membrane	6.01149e-41	0.273871	0.988	0.926	5.73376e-37	3	go-protein-transport-within-plasma-membrane
go-negative-regulation-of-hypoxia-induced-intrinsic-apoptotic-signaling-pathway1	1.35961e-40	0.393364	0.915	0.915	1.29679e-36	3	go-negative-regulation-of-hypoxia-induced-intrinsic-apoptotic-signaling-pathway
go-positive-regulation-of-intrinsic-apoptotic-signaling-pathway-by-p53-class-mediator1	6.15095e-40	0.476755	1	0.999	5.86678e-36	3	go-positive-regulation-of-intrinsic-apoptotic-signaling-pathway-by-p53-class-mediator
go-presynapse3	8.02267e-40	0.548581	1	0.985	7.65202e-36	3	go-presynapse
go-oxidoreductase-activity-acting-on-a-heme-group-of-donors	1.50848e-39	0.340876	1	1	1.43879e-35	3	go-oxidoreductase-activity-acting-on-a-heme-group-of-donors
go-regulation-of-sodium-ion-transport2	3.70574e-39	0.448134	1	0.985	3.53453e-35	3	go-regulation-of-sodium-ion-transport
go-copi-coated-vesicle	5.03699e-39	0.309277	1	0.999	4.80428e-35	3	go-copi-coated-vesicle
go-cell-projection-part1	6.67717e-39	0.384076	1	1	6.36868e-35	3	go-cell-projection-part
go-regulation-of-synaptic-plasticity1	8.25495e-39	0.283578	1	0.739	7.87357e-35	3	go-regulation-of-synaptic-plasticity
go-regulation-of-synaptic-vesicle-cycle3	9.63984e-39	0.532059	1	0.913	9.19448e-35	3	go-regulation-of-synaptic-vesicle-cycle
go-coated-vesicle-membrane1	1.00918e-38	0.257429	1	1	9.62556e-35	3	go-coated-vesicle-membrane
go-signal-release-from-synapse2	1.10308e-38	0.489893	1	0.787	1.05212e-34	3	go-signal-release-from-synapse
go-tetrahydrobiopterin-biosynthetic-process	2.77792e-38	0.346509	0.991	0.926	2.64958e-34	3	go-tetrahydrobiopterin-biosynthetic-process
go-chemical-homeostasis1	3.49002e-38	0.407441	1	0.998	3.32878e-34	3	go-chemical-homeostasis
go-cellular-chemical-homeostasis1	3.50332e-38	0.445704	1	0.997	3.34146e-34	3	go-cellular-chemical-homeostasis
go-receptor-internalization1	4.31796e-38	0.372294	1	0.994	4.11847e-34	3	go-receptor-internalization
go-aerobic-electron-transport-chain1	5.12912e-38	0.285521	1	1	4.89216e-34	3	go-aerobic-electron-transport-chain
go-vesicle-localization2	5.79853e-38	0.339158	1	1	5.53064e-34	3	go-vesicle-localization
go-stat-family-protein-binding1	7.13049e-38	0.268603	0.806	0.732	6.80106e-34	3	go-stat-family-protein-binding
go-cell-body1	9.49888e-38	0.397698	1	1	9.06003e-34	3	go-cell-body
go-synaptic-vesicle-cycle3	1.03875e-37	0.532276	1	0.991	9.90758e-34	3	go-synaptic-vesicle-cycle
go-metencephalon-development1	1.12625e-37	0.330957	0.994	0.952	1.07421e-33	3	go-metencephalon-development
go-atpase-activity-coupled-to-movement-of-substances1	2.14819e-37	0.349585	1	0.993	2.04894e-33	3	go-atpase-activity-coupled-to-movement-of-substances
go-response-to-calcium-ion1	4.56327e-37	0.39204	1	0.999	4.35245e-33	3	go-response-to-calcium-ion
go-regulation-of-synaptic-vesicle-transport1	5.08113e-37	0.470647	0.997	0.842	4.84638e-33	3	go-regulation-of-synaptic-vesicle-transport
go-cytochrome-complex	5.22177e-37	0.33713	1	0.999	4.98053e-33	3	go-cytochrome-complex
go-mitochondrial-respiratory-chain-complex-iv	1.9572e-36	0.361558	0.991	0.985	1.86678e-32	3	go-mitochondrial-respiratory-chain-complex-iv
go-amyloid-beta-clearance1	6.46158e-36	0.414168	1	0.999	6.16306e-32	3	go-amyloid-beta-clearance
go-ubiquitin-ligase-inhibitor-activity1	7.55194e-36	0.460077	1	0.999	7.20304e-32	3	go-ubiquitin-ligase-inhibitor-activity
go-regulation-of-secretion1	7.82611e-36	0.433914	1	0.971	7.46455e-32	3	go-regulation-of-secretion
go-oxidoreductase-complex	8.00024e-36	0.276084	1	0.999	7.63063e-32	3	go-oxidoreductase-complex
go-mitochondrial-membrane-part	2.23449e-35	0.254413	1	1	2.13126e-31	3	go-mitochondrial-membrane-part
go-glutamatergic-synapse1	3.53971e-35	0.436943	1	1	3.37617e-31	3	go-glutamatergic-synapse
go-regulation-of-calcium-ion-dependent-exocytosis1	6.89422e-35	0.317346	0.994	0.751	6.5757e-31	3	go-regulation-of-calcium-ion-dependent-exocytosis
go-negative-regulation-of-microtubule-polymerization1	1.10302e-34	0.290388	0.997	0.95	1.05206e-30	3	go-negative-regulation-of-microtubule-polymerization
go-carbohydrate-homeostasis1	1.81229e-34	0.342587	1	1	1.72857e-30	3	go-carbohydrate-homeostasis
go-zona-pellucida-receptor-complex	4.67345e-34	0.340531	0.97	0.947	4.45754e-30	3	go-zona-pellucida-receptor-complex
go-somatodendritic-compartment1	5.63539e-34	0.403823	1	1	5.37504e-30	3	go-somatodendritic-compartment
go-synaptic-vesicle-exocytosis3	1.07608e-33	0.466788	1	0.889	1.02636e-29	3	go-synaptic-vesicle-exocytosis
go-actin-dependent-atpase-activity1	3.1416e-33	0.382556	1	0.994	2.99645e-29	3	go-actin-dependent-atpase-activity
go-negative-regulation-of-receptor-signaling-pathway-via-stat	3.26607e-33	0.347787	0.988	0.99	3.11517e-29	3	go-negative-regulation-of-receptor-signaling-pathway-via-stat
go-proton-transmembrane-transporter-activity1	4.50026e-33	0.384395	1	0.997	4.29235e-29	3	go-proton-transmembrane-transporter-activity
go-crd-mediated-mrna-stability-complex1	6.60156e-33	0.250224	1	0.998	6.29657e-29	3	go-crd-mediated-mrna-stability-complex
go-presynaptic-active-zone2	1.07465e-32	0.383671	1	0.82	1.025e-28	3	go-presynaptic-active-zone
go-substantia-nigra-development1	1.26163e-32	0.258264	1	1	1.20334e-28	3	go-substantia-nigra-development
go-neural-nucleus-development1	2.20064e-32	0.311816	1	1	2.09897e-28	3	go-neural-nucleus-development
go-atp-dependent-protein-binding2	2.54545e-32	0.355036	0.973	0.948	2.42785e-28	3	go-atp-dependent-protein-binding
go-regulation-of-trans-synaptic-signaling2	2.90087e-32	0.432897	1	0.762	2.76685e-28	3	go-regulation-of-trans-synaptic-signaling
go-calcium-ion-regulated-exocytosis3	4.2954e-32	0.472464	1	0.925	4.09696e-28	3	go-calcium-ion-regulated-exocytosis
go-interkinetic-nuclear-migration	6.30491e-32	0.467664	0.891	0.853	6.01362e-28	3	go-interkinetic-nuclear-migration
go-neuron-to-neuron-synapse2	8.18866e-32	0.403669	1	0.999	7.81034e-28	3	go-neuron-to-neuron-synapse
go-u12-type-spliceosomal-complex	5.06936e-31	0.291307	1	0.999	4.83516e-27	3	go-u12-type-spliceosomal-complex
go-posttranslational-protein-targeting-to-membrane-translocation1	5.70581e-31	0.25938	0.997	0.989	5.4422e-27	3	go-posttranslational-protein-targeting-to-membrane-translocation
go-neuron-projection1	1.18332e-30	0.378559	1	1	1.12865e-26	3	go-neuron-projection
go-syntaxin-1-binding3	2.07534e-30	0.42573	1	0.938	1.97946e-26	3	go-syntaxin-1-binding
go-modification-of-postsynaptic-actin-cytoskeleton1	2.72605e-30	0.397051	1	0.991	2.60011e-26	3	go-modification-of-postsynaptic-actin-cytoskeleton
go-nadh-dehydrogenase-complex-assembly	5.95487e-30	0.255882	1	0.999	5.67975e-26	3	go-nadh-dehydrogenase-complex-assembly
go-intrinsic-component-of-synaptic-vesicle-membrane2	8.58866e-30	0.421098	0.997	0.925	8.19186e-26	3	go-intrinsic-component-of-synaptic-vesicle-membrane
go-copi-coated-vesicle-membrane	9.61025e-30	0.28214	1	0.998	9.16626e-26	3	go-copi-coated-vesicle-membrane
go-dendritic-tree2	1.03776e-29	0.359473	1	1	9.89815e-26	3	go-dendritic-tree
go-mitochondrial-respiratory-chain-complex-assembly1	1.30492e-29	0.250004	1	1	1.24463e-25	3	go-mitochondrial-respiratory-chain-complex-assembly
go-synaptic-vesicle-recycling2	1.47283e-29	0.414597	1	0.999	1.40479e-25	3	go-synaptic-vesicle-recycling
go-signal-release2	1.94762e-29	0.451667	1	0.998	1.85764e-25	3	go-signal-release
go-regulation-of-synaptic-vesicle-recycling2	1.11609e-28	0.381437	1	0.986	1.06452e-24	3	go-regulation-of-synaptic-vesicle-recycling
go-regulation-of-synaptic-vesicle-endocytosis1	1.66554e-28	0.359266	0.997	0.984	1.58859e-24	3	go-regulation-of-synaptic-vesicle-endocytosis
go-retrograde-neuronal-dense-core-vesicle-transport1	1.96844e-28	0.394773	0.833	0.853	1.8775e-24	3	go-retrograde-neuronal-dense-core-vesicle-transport
go-mediator-complex-binding	2.77209e-28	0.407422	0.842	0.844	2.64402e-24	3	go-mediator-complex-binding
go-positive-regulation-of-sodium-ion-transport1	3.41502e-28	0.371944	0.997	0.997	3.25724e-24	3	go-positive-regulation-of-sodium-ion-transport
go-tpr-domain-binding1	5.77014e-28	0.269669	0.991	0.986	5.50356e-24	3	go-tpr-domain-binding
go-presynaptic-endocytosis3	1.45762e-27	0.420945	1	0.995	1.39028e-23	3	go-presynaptic-endocytosis
go-regulation-of-sodium-ion-transmembrane-transporter-activity	1.9113e-27	0.272426	0.979	0.973	1.823e-23	3	go-regulation-of-sodium-ion-transmembrane-transporter-activity
go-synapse-organization2	2.41509e-27	0.271881	1	0.95	2.30351e-23	3	go-synapse-organization
go-neuron-spine1	5.15765e-27	0.38335	1	0.994	4.91937e-23	3	go-neuron-spine
go-exocytic-vesicle3	5.30165e-27	0.439594	1	1	5.05672e-23	3	go-exocytic-vesicle
go-synaptic-vesicle-membrane3	6.06671e-27	0.436818	1	0.948	5.78643e-23	3	go-synaptic-vesicle-membrane
go-nucleosomal-dna-binding1	1.21494e-26	0.276586	1	0.999	1.15881e-22	3	go-nucleosomal-dna-binding
go-regulation-of-insulin-secretion2	2.13602e-26	0.412793	1	0.998	2.03733e-22	3	go-regulation-of-insulin-secretion
go-regulation-of-hormone-secretion2	2.63773e-26	0.409693	1	0.983	2.51586e-22	3	go-regulation-of-hormone-secretion
go-import-into-cell1	5.09487e-26	0.337099	1	0.999	4.85948e-22	3	go-import-into-cell
go-clathrin-binding2	5.4159e-26	0.377445	0.997	0.984	5.16568e-22	3	go-clathrin-binding
go-peptide-hormone-secretion2	5.86712e-26	0.402167	1	0.997	5.59606e-22	3	go-peptide-hormone-secretion
go-insulin-secretion2	6.73431e-26	0.39407	1	0.999	6.42319e-22	3	go-insulin-secretion
go-chaperone-mediated-protein-complex-assembly1	8.45596e-26	0.323997	1	1	8.0653e-22	3	go-chaperone-mediated-protein-complex-assembly
go-peptide-secretion1	8.81287e-26	0.355274	1	0.996	8.40572e-22	3	go-peptide-secretion
go-hormone-transport2	1.81433e-25	0.384842	1	0.997	1.7305e-21	3	go-hormone-transport
go-negative-regulation-of-transport1	2.96982e-25	0.324616	1	0.999	2.83261e-21	3	go-negative-regulation-of-transport
go-regulation-of-exocytosis2	4.44393e-25	0.360475	1	0.994	4.23862e-21	3	go-regulation-of-exocytosis
go-modification-of-postsynaptic-structure	4.59584e-25	0.353272	1	0.998	4.38351e-21	3	go-modification-of-postsynaptic-structure
go-regulation-of-sodium-ion-transmembrane-transport1	7.97666e-25	0.337404	0.994	0.986	7.60813e-21	3	go-regulation-of-sodium-ion-transmembrane-transport
go-positive-regulation-of-arp2-3-complex-mediated-actin-nucleation	9.00734e-25	0.31496	0.979	0.96	8.5912e-21	3	go-positive-regulation-of-arp2-3-complex-mediated-actin-nucleation
go-copi-vesicle-coat	1.53039e-24	0.296102	1	0.997	1.45969e-20	3	go-copi-vesicle-coat
go-amide-binding1	1.90374e-24	0.283755	1	0.999	1.81579e-20	3	go-amide-binding
go-maternal-process-involved-in-female-pregnancy	5.28539e-24	0.272832	1	0.997	5.0412e-20	3	go-maternal-process-involved-in-female-pregnancy
go-scarna-localization-to-cajal-body	7.267e-24	0.374727	0.803	0.864	6.93127e-20	3	go-scarna-localization-to-cajal-body
go-actomyosin	1.64669e-23	0.275081	1	0.999	1.57061e-19	3	go-actomyosin
go-regulation-of-peptide-hormone-secretion2	3.27902e-23	0.400145	1	0.994	3.12753e-19	3	go-regulation-of-peptide-hormone-secretion
go-nitric-oxide-synthase-regulator-activity1	4.3144e-23	0.26522	1	1	4.11507e-19	3	go-nitric-oxide-synthase-regulator-activity
go-cell-adhesion-mediator-activity1	1.62361e-22	0.295466	1	0.997	1.54859e-18	3	go-cell-adhesion-mediator-activity
go-regulation-of-hormone-levels1	1.84689e-22	0.271163	1	0.968	1.76156e-18	3	go-regulation-of-hormone-levels
go-mhc-class-ii-protein-complex-binding1	7.1887e-22	0.281508	1	1	6.85658e-18	3	go-mhc-class-ii-protein-complex-binding
go-leucine-binding1	9.0354e-22	0.266907	0.842	0.812	8.61797e-18	3	go-leucine-binding
go-amyloid-beta-clearance-by-transcytosis	9.88803e-22	0.251015	1	0.994	9.4312e-18	3	go-amyloid-beta-clearance-by-transcytosis
go-intraciliary-transport-involved-in-cilium-assembly1	1.02295e-21	0.356699	0.997	0.989	9.75694e-18	3	go-intraciliary-transport-involved-in-cilium-assembly
go-proton-exporting-atpase-activity2	2.00635e-21	0.290053	1	0.999	1.91366e-17	3	go-proton-exporting-atpase-activity
go-protein-transport-along-microtubule1	2.06744e-21	0.298513	1	0.999	1.97192e-17	3	go-protein-transport-along-microtubule
go-cytoplasmic-dynein-complex	3.4792e-21	0.250931	1	0.999	3.31846e-17	3	go-cytoplasmic-dynein-complex
go-s-adenosylmethionine-metabolic-process1	6.0791e-21	0.282873	0.982	0.955	5.79825e-17	3	go-s-adenosylmethionine-metabolic-process
go-adenylate-cyclase-activator-activity1	6.17726e-21	0.288327	1	0.997	5.89187e-17	3	go-adenylate-cyclase-activator-activity
go-microtubule-associated-complex1	8.34995e-21	0.277399	1	1	7.96418e-17	3	go-microtubule-associated-complex
go-cell-cell-signaling1	1.99083e-20	0.29574	1	0.994	1.89886e-16	3	go-cell-cell-signaling
go-insulin-secretion-involved-in-cellular-response-to-glucose-stimulus2	2.18727e-20	0.318681	1	0.997	2.08622e-16	3	go-insulin-secretion-involved-in-cellular-response-to-glucose-stimulus
go-modification-of-synaptic-structure1	2.48303e-20	0.270167	1	1	2.36832e-16	3	go-modification-of-synaptic-structure
go-syntaxin-binding3	3.66841e-20	0.335288	1	0.999	3.49893e-16	3	go-syntaxin-binding
go-positive-regulation-of-intracellular-lipid-transport	3.81972e-20	0.37278	0.648	0.666	3.64325e-16	3	go-positive-regulation-of-intracellular-lipid-transport
go-rna-stabilization1	4.15005e-20	0.254157	1	0.999	3.95832e-16	3	go-rna-stabilization
go-regulation-of-receptor-mediated-endocytosis	4.89807e-20	0.291348	1	1	4.67177e-16	3	go-regulation-of-receptor-mediated-endocytosis
go-cell-cell-adhesion-mediator-activity1	5.56896e-20	0.273832	1	0.994	5.31168e-16	3	go-cell-cell-adhesion-mediator-activity
go-negative-regulation-of-synaptic-vesicle-exocytosis	7.47835e-20	0.27295	0.758	0.749	7.13285e-16	3	go-negative-regulation-of-synaptic-vesicle-exocytosis
go-ion-channel-binding1	1.5965e-19	0.270991	1	0.999	1.52275e-15	3	go-ion-channel-binding
go-phagosome-acidification	1.84458e-19	0.253192	0.997	1	1.75936e-15	3	go-phagosome-acidification
go-prespliceosome	2.80821e-19	0.295659	0.997	0.994	2.67847e-15	3	go-prespliceosome
go-thioredoxin-peroxidase-activity	3.67292e-19	0.311176	0.948	0.919	3.50323e-15	3	go-thioredoxin-peroxidase-activity
go-myosin-v-binding1	4.56597e-19	0.302645	1	1	4.35502e-15	3	go-myosin-v-binding
go-snare-binding3	4.85637e-19	0.303328	1	0.999	4.632e-15	3	go-snare-binding
go-regulation-of-oxidative-phosphorylation	6.99907e-19	0.279717	1	0.998	6.67571e-15	3	go-regulation-of-oxidative-phosphorylation
go-response-to-indole-3-methanol	2.676e-18	0.329079	0.8	0.854	2.55237e-14	3	go-response-to-indole-3-methanol
go-gpi-anchor-transamidase-complex	4.2721e-18	0.304751	0.718	0.683	4.07473e-14	3	go-gpi-anchor-transamidase-complex
go-gpi-anchor-transamidase-activity	4.2721e-18	0.304751	0.718	0.683	4.07473e-14	3	go-gpi-anchor-transamidase-activity
go-postsynapse-organization2	1.49573e-17	0.268727	1	0.997	1.42663e-13	3	go-postsynapse-organization
go-protein-retention-in-golgi-apparatus1	2.57263e-17	0.302188	0.918	0.907	2.45378e-13	3	go-protein-retention-in-golgi-apparatus
go-coenzyme-a-metabolic-process	2.70022e-17	0.356399	0.736	0.741	2.57547e-13	3	go-coenzyme-a-metabolic-process
go-cul7-ring-ubiquitin-ligase-complex	7.28818e-17	0.303736	0.87	0.874	6.95147e-13	3	go-cul7-ring-ubiquitin-ligase-complex
go-actin-filament-bundle	7.29807e-17	0.253322	1	0.998	6.9609e-13	3	go-actin-filament-bundle
go-negative-regulation-of-transforming-growth-factor-beta1-production	1.14527e-16	0.288329	0.652	0.684	1.09236e-12	3	go-negative-regulation-of-transforming-growth-factor-beta1-production
go-intraciliary-transport1	1.30271e-16	0.307632	1	0.985	1.24252e-12	3	go-intraciliary-transport
go-lysosomal-lumen	5.45881e-16	0.257897	1	0.993	5.20661e-12	3	go-lysosomal-lumen
go-heat-acclimation	3.43333e-11	0.2587	0.788	0.844	3.27471e-07	3	go-heat-acclimation
go-respiratory-chain-complex-ii	0.00343375	0.262091	0.533	0.708	1	3	go-respiratory-chain-complex-ii
go-succinate-dehydrogenase-activity	0.00343375	0.262091	0.533	0.708	1	3	go-succinate-dehydrogenase-activity
go-tube-morphogenesis	4.64562e-140	0.372531	1	0.177	4.43099e-136	4	go-tube-morphogenesis
go-cell-junction-assembly	1.07891e-125	1.04199	1	1	1.02906e-121	4	go-cell-junction-assembly
go-cell-junction-organization	2.24626e-123	0.933822	1	1	2.14248e-119	4	go-cell-junction-organization
go-epithelium-development	1.00737e-121	1.7465	1	0.949	9.60825e-118	4	go-epithelium-development
go-response-to-biotic-stimulus	3.61735e-119	0.563483	0.971	0.223	3.45023e-115	4	go-response-to-biotic-stimulus
go-anatomical-structure-formation-involved-in-morphogenesis	2.20788e-118	0.450358	0.992	0.204	2.10588e-114	4	go-anatomical-structure-formation-involved-in-morphogenesis
go-morphogenesis-of-an-epithelium	2.78622e-117	1.13374	1	0.999	2.6575e-113	4	go-morphogenesis-of-an-epithelium
go-entry-into-other-organism-involved-in-symbiotic-interaction	6.54911e-117	1.41195	1	0.992	6.24654e-113	4	go-entry-into-other-organism-involved-in-symbiotic-interaction
go-interaction-with-host	1.55423e-114	0.853795	1	1	1.48243e-110	4	go-interaction-with-host
go-response-to-tumor-necrosis-factor	1.89307e-114	1.22877	1	0.991	1.80561e-110	4	go-response-to-tumor-necrosis-factor
go-apical-junction-complex	1.0663e-112	1.53319	1	0.921	1.01704e-108	4	go-apical-junction-complex
go-regulation-of-intracellular-signal-transduction	1.15337e-112	0.721802	1	1	1.10008e-108	4	go-regulation-of-intracellular-signal-transduction
go-cell-cell-junction	1.60213e-112	1.19076	1	0.998	1.52811e-108	4	go-cell-cell-junction
go-tight-junction	2.51488e-112	1.58914	1	0.864	2.39869e-108	4	go-tight-junction
go-biological-adhesion	5.60293e-112	0.685558	0.93	0.206	5.34407e-108	4	go-biological-adhesion
go-extrinsic-apoptotic-signaling-pathway	5.98246e-112	1.10135	1	0.997	5.70607e-108	4	go-extrinsic-apoptotic-signaling-pathway
go-tissue-morphogenesis	1.49325e-111	1.37485	1	0.995	1.42426e-107	4	go-tissue-morphogenesis
go-positive-regulation-of-locomotion	2.45292e-111	1.53994	1	0.875	2.3396e-107	4	go-positive-regulation-of-locomotion
go-response-to-transforming-growth-factor-beta	3.00074e-109	1.11734	1	0.995	2.86211e-105	4	go-response-to-transforming-growth-factor-beta
go-viral-life-cycle	8.48218e-109	0.535631	1	1	8.09031e-105	4	go-viral-life-cycle
go-regulation-of-cell-adhesion	1.35673e-108	1.49485	1	0.639	1.29405e-104	4	go-regulation-of-cell-adhesion
go-i-kappab-kinase-nf-kappab-signaling	9.12821e-108	0.994877	1	1	8.70649e-104	4	go-i-kappab-kinase-nf-kappab-signaling
go-positive-regulation-of-intracellular-signal-transduction	7.98773e-107	1.14906	1	0.999	7.6187e-103	4	go-positive-regulation-of-intracellular-signal-transduction
go-positive-regulation-of-i-kappab-kinase-nf-kappab-signaling	1.61728e-106	1.25906	1	0.995	1.54256e-102	4	go-positive-regulation-of-i-kappab-kinase-nf-kappab-signaling
go-laminin-binding	5.31338e-106	0.435746	0.996	0.262	5.0679e-102	4	go-laminin-binding
go-tube-development	5.49352e-105	0.837327	1	0.301	5.23972e-101	4	go-tube-development
go-cell-substrate-junction-assembly	8.81503e-105	0.923704	1	1	8.40777e-101	4	go-cell-substrate-junction-assembly
go-epithelial-cell-differentiation	2.49651e-104	0.644545	0.926	0.215	2.38117e-100	4	go-epithelial-cell-differentiation
go-response-to-growth-factor	2.54008e-104	1.0604	1	0.999	2.42273e-100	4	go-response-to-growth-factor
go-response-to-cytokine	1.25915e-102	0.826033	1	1	1.20098e-98	4	go-response-to-cytokine
go-signal-transduction-by-protein-phosphorylation	1.28043e-102	0.871935	1	1	1.22127e-98	4	go-signal-transduction-by-protein-phosphorylation
go-membrane-to-membrane-docking	1.00715e-100	0.506802	0.852	0.201	9.60618e-97	4	go-membrane-to-membrane-docking
go-regulation-of-extrinsic-apoptotic-signaling-pathway	2.0438e-99	1.2481	1	0.977	1.94938e-95	4	go-regulation-of-extrinsic-apoptotic-signaling-pathway
go-enzyme-linked-receptor-protein-signaling-pathway	8.79845e-99	0.679701	1	1	8.39196e-95	4	go-enzyme-linked-receptor-protein-signaling-pathway
go-cell-cell-junction-organization	1.28546e-98	1.38089	1	0.943	1.22607e-94	4	go-cell-cell-junction-organization
go-laminin-complex	2.16445e-98	1.02547	0.967	0.385	2.06445e-94	4	go-laminin-complex
go-regulation-of-viral-life-cycle	3.13382e-97	0.776336	1	1	2.98904e-93	4	go-regulation-of-viral-life-cycle
go-cell-matrix-adhesion	4.99715e-97	1.34094	1	0.897	4.76628e-93	4	go-cell-matrix-adhesion
go-negative-regulation-of-response-to-stimulus	1.65145e-96	0.651098	1	1	1.57515e-92	4	go-negative-regulation-of-response-to-stimulus
go-cell-cell-junction-assembly	4.4275e-96	1.35355	1	0.929	4.22295e-92	4	go-cell-cell-junction-assembly
go-cytokine-mediated-signaling-pathway	1.12024e-95	1.07054	1	0.998	1.06849e-91	4	go-cytokine-mediated-signaling-pathway
go-response-to-virus	1.36621e-95	1.15499	1	0.991	1.30309e-91	4	go-response-to-virus
go-cell-cell-adhesion	1.39201e-95	0.459719	0.905	0.204	1.3277e-91	4	go-cell-cell-adhesion
go-defense-response	1.73578e-95	0.93309	0.959	0.295	1.65559e-91	4	go-defense-response
go-negative-regulation-of-extrinsic-apoptotic-signaling-pathway	9.37047e-95	1.25031	1	0.944	8.93756e-91	4	go-negative-regulation-of-extrinsic-apoptotic-signaling-pathway
go-response-to-interleukin-1	5.75635e-93	0.639668	1	1	5.4904e-89	4	go-response-to-interleukin-1
go-protein-phosphorylation	7.63301e-93	0.512157	1	1	7.28036e-89	4	go-protein-phosphorylation
go-morphogenesis-of-a-branching-structure	1.94365e-91	0.377071	0.996	0.277	1.85386e-87	4	go-morphogenesis-of-a-branching-structure
go-negative-regulation-of-intracellular-signal-transduction	1.73931e-90	0.506944	1	1	1.65895e-86	4	go-negative-regulation-of-intracellular-signal-transduction
go-regulation-of-cell-matrix-adhesion	1.919e-90	1.17104	1	0.985	1.83034e-86	4	go-regulation-of-cell-matrix-adhesion
go-regulation-of-cell-population-proliferation	3.6559e-90	1.36277	1	0.848	3.487e-86	4	go-regulation-of-cell-population-proliferation
go-apoptotic-signaling-pathway	9.13088e-90	0.463575	1	1	8.70903e-86	4	go-apoptotic-signaling-pathway
go-positive-regulation-of-cell-adhesion	9.90684e-90	1.13752	1	0.454	9.44915e-86	4	go-positive-regulation-of-cell-adhesion
go-response-to-lipid	1.03026e-89	1.05461	1	0.999	9.82666e-86	4	go-response-to-lipid
go-immune-effector-process	1.50298e-89	0.781322	1	1	1.43354e-85	4	go-immune-effector-process
go-regulation-of-immune-system-process	1.58076e-89	1.33941	1	0.756	1.50773e-85	4	go-regulation-of-immune-system-process
go-regulation-of-multi-organism-process	2.33833e-89	0.647861	1	1	2.2303e-85	4	go-regulation-of-multi-organism-process
go-animal-organ-morphogenesis	9.87715e-88	1.32316	1	0.935	9.42083e-84	4	go-animal-organ-morphogenesis
go-regulation-of-phosphorus-metabolic-process	1.08694e-87	0.508773	1	1	1.03672e-83	4	go-regulation-of-phosphorus-metabolic-process
go-response-to-wounding	1.33053e-87	1.2305	1	0.936	1.26906e-83	4	go-response-to-wounding
go-erbb-signaling-pathway	1.34076e-87	0.87834	1	0.999	1.27882e-83	4	go-erbb-signaling-pathway
go-cellular-response-to-abiotic-stimulus	1.55447e-87	0.997717	1	0.993	1.48265e-83	4	go-cellular-response-to-abiotic-stimulus
go-response-to-interferon-gamma	5.43819e-87	1.26013	1	0.976	5.18694e-83	4	go-response-to-interferon-gamma
go-epithelial-tube-morphogenesis	5.71517e-87	1.28462	1	0.707	5.45113e-83	4	go-epithelial-tube-morphogenesis
go-positive-regulation-of-signaling	1.7734e-86	0.514346	1	1	1.69146e-82	4	go-positive-regulation-of-signaling
go-transforming-growth-factor-beta-receptor-signaling-pathway	1.93606e-86	0.843591	1	0.999	1.84661e-82	4	go-transforming-growth-factor-beta-receptor-signaling-pathway
go-embryo-development	2.55782e-86	0.80588	1	0.999	2.43965e-82	4	go-embryo-development
go-regulation-of-cell-death	1.29377e-85	0.520484	1	1	1.234e-81	4	go-regulation-of-cell-death
go-gland-development	1.58488e-85	1.05668	1	0.995	1.51166e-81	4	go-gland-development
go-regulation-of-symbiosis-encompassing-mutualism-through-parasitism	3.50405e-85	0.520912	1	1	3.34216e-81	4	go-regulation-of-symbiosis-encompassing-mutualism-through-parasitism
go-apical-junction-assembly	3.59676e-85	0.913064	1	0.995	3.43059e-81	4	go-apical-junction-assembly
go-regulation-of-defense-response	3.76503e-85	1.07856	1	0.996	3.59109e-81	4	go-regulation-of-defense-response
go-negative-regulation-of-signaling	1.97088e-84	0.506654	1	1	1.87983e-80	4	go-negative-regulation-of-signaling
go-tube-formation	3.98295e-84	1.26103	1	0.936	3.79893e-80	4	go-tube-formation
go-innate-immune-response	5.7052e-84	1.38022	1	0.848	5.44162e-80	4	go-innate-immune-response
go-regulation-of-cellular-component-movement	6.70526e-84	1.34168	1	0.693	6.39548e-80	4	go-regulation-of-cellular-component-movement
go-actin-cytoskeleton	1.21211e-83	0.54699	1	1	1.15611e-79	4	go-actin-cytoskeleton
go-cell-substrate-adhesion	1.28692e-83	1.26765	1	0.745	1.22747e-79	4	go-cell-substrate-adhesion
go-regulation-of-mapk-cascade	2.7799e-83	1.29258	1	0.886	2.65147e-79	4	go-regulation-of-mapk-cascade
go-circulatory-system-development	1.76612e-82	0.870162	1	0.396	1.68453e-78	4	go-circulatory-system-development
go-response-to-steroid-hormone	3.56891e-82	0.625507	1	1	3.40402e-78	4	go-response-to-steroid-hormone
go-regulation-of-anatomical-structure-morphogenesis	5.61378e-82	0.829569	1	1	5.35442e-78	4	go-regulation-of-anatomical-structure-morphogenesis
go-specific-granule	6.90527e-82	0.986446	1	0.996	6.58625e-78	4	go-specific-granule
go-apoptotic-process	1.71211e-81	0.389412	1	1	1.63301e-77	4	go-apoptotic-process
go-hippo-signaling	6.85972e-81	1.21146	1	0.976	6.5428e-77	4	go-hippo-signaling
go-positive-regulation-of-phosphorus-metabolic-process	1.93505e-80	1.12185	1	0.987	1.84565e-76	4	go-positive-regulation-of-phosphorus-metabolic-process
go-immune-system-development	1.98118e-80	0.72914	1	0.999	1.88965e-76	4	go-immune-system-development
go-positive-regulation-of-immune-response	2.96075e-80	1.27757	1	0.91	2.82397e-76	4	go-positive-regulation-of-immune-response
go-transmembrane-receptor-protein-tyrosine-kinase-signaling-pathway	3.28298e-80	0.48482	1	1	3.13131e-76	4	go-transmembrane-receptor-protein-tyrosine-kinase-signaling-pathway
go-cellular-response-to-lipid	7.55291e-80	0.934042	1	0.997	7.20397e-76	4	go-cellular-response-to-lipid
go-embryo-development-ending-in-birth-or-egg-hatching	6.12101e-79	0.637297	1	1	5.83822e-75	4	go-embryo-development-ending-in-birth-or-egg-hatching
go-epidermal-growth-factor-receptor-signaling-pathway	6.59978e-79	0.98392	1	0.991	6.29487e-75	4	go-epidermal-growth-factor-receptor-signaling-pathway
go-regulation-of-apoptotic-signaling-pathway	9.22616e-79	0.415794	1	1	8.79991e-75	4	go-regulation-of-apoptotic-signaling-pathway
go-wound-healing	2.1055e-78	1.1667	1	0.898	2.00823e-74	4	go-wound-healing
go-regulation-of-kinase-activity	2.38231e-78	0.45552	1	1	2.27225e-74	4	go-regulation-of-kinase-activity
go-endothelial-cell-development	2.45125e-78	1.11059	1	0.958	2.338e-74	4	go-endothelial-cell-development
go-negative-regulation-of-cell-death	3.2642e-78	0.51708	1	1	3.1134e-74	4	go-negative-regulation-of-cell-death
go-response-to-epidermal-growth-factor	3.75338e-78	0.794886	1	0.995	3.57997e-74	4	go-response-to-epidermal-growth-factor
go-cell-activation	6.93728e-78	0.766715	1	0.999	6.61678e-74	4	go-cell-activation
go-regulation-of-response-to-stress	7.61799e-78	0.445001	1	1	7.26604e-74	4	go-regulation-of-response-to-stress
go-regulation-of-cellular-response-to-transforming-growth-factor-beta-stimulus	9.28108e-78	1.06129	1	0.992	8.85229e-74	4	go-regulation-of-cellular-response-to-transforming-growth-factor-beta-stimulus
go-regulation-of-innate-immune-response	1.34626e-77	0.538341	1	1	1.28407e-73	4	go-regulation-of-innate-immune-response
go-negative-regulation-of-molecular-function	1.63295e-77	0.503867	1	1	1.55751e-73	4	go-negative-regulation-of-molecular-function
go-regulation-of-cell-projection-assembly	2.65844e-77	0.673743	1	0.999	2.53562e-73	4	go-regulation-of-cell-projection-assembly
go-activation-of-immune-response	4.66937e-77	1.20443	1	0.956	4.45365e-73	4	go-activation-of-immune-response
go-regulation-of-hydrolase-activity	9.21685e-77	0.430263	1	1	8.79103e-73	4	go-regulation-of-hydrolase-activity
go-heart-development	1.23234e-76	1.16358	1	0.958	1.17541e-72	4	go-heart-development
go-cadherin-binding-involved-in-cell-cell-adhesion	1.50298e-76	1.05935	1	0.992	1.43354e-72	4	go-cadherin-binding-involved-in-cell-cell-adhesion
go-t-cell-activation	2.28167e-76	0.450262	0.988	0.311	2.17626e-72	4	go-t-cell-activation
go-phosphatidylinositol-3-kinase-signaling	4.6854e-76	0.335001	0.996	0.32	4.46894e-72	4	go-phosphatidylinositol-3-kinase-signaling
go-regulation-of-cell-cell-adhesion	6.33767e-76	0.569848	0.996	0.339	6.04487e-72	4	go-regulation-of-cell-cell-adhesion
go-regulation-of-map-kinase-activity	1.17934e-75	0.911034	1	0.995	1.12486e-71	4	go-regulation-of-map-kinase-activity
go-embryonic-placenta-development	2.34612e-75	1.05409	1	0.987	2.23773e-71	4	go-embryonic-placenta-development
go-canonical-wnt-signaling-pathway	6.01793e-75	0.570393	1	1	5.7399e-71	4	go-canonical-wnt-signaling-pathway
go-positive-regulation-of-epithelial-cell-migration	1.1113e-74	1.08384	1	0.99	1.05996e-70	4	go-positive-regulation-of-epithelial-cell-migration
go-actin-filament-bundle-organization	8.42931e-74	0.814166	1	0.996	8.03987e-70	4	go-actin-filament-bundle-organization
go-positive-regulation-of-protein-metabolic-process	1.4319e-73	0.419785	1	1	1.36575e-69	4	go-positive-regulation-of-protein-metabolic-process
go-negative-regulation-of-catalytic-activity	2.34839e-73	0.540934	1	1	2.23989e-69	4	go-negative-regulation-of-catalytic-activity
go-positive-regulation-of-cell-death	2.60288e-73	0.515751	1	1	2.48263e-69	4	go-positive-regulation-of-cell-death
go-regulation-of-small-gtpase-mediated-signal-transduction	2.6341e-73	0.913108	1	0.988	2.5124e-69	4	go-regulation-of-small-gtpase-mediated-signal-transduction
go-immune-response-regulating-signaling-pathway	3.94928e-73	1.06429	1	0.985	3.76682e-69	4	go-immune-response-regulating-signaling-pathway
go-regulation-of-wnt-signaling-pathway	7.37314e-73	0.49921	1	1	7.0325e-69	4	go-regulation-of-wnt-signaling-pathway
go-cell-motility	1.02564e-72	0.687393	0.963	0.305	9.78256e-69	4	go-cell-motility
go-regulation-of-cell-substrate-adhesion	1.39686e-72	1.22528	1	0.861	1.33233e-68	4	go-regulation-of-cell-substrate-adhesion
go-positive-regulation-of-immune-system-process	4.06917e-72	1.27532	0.996	0.71	3.88118e-68	4	go-positive-regulation-of-immune-system-process
go-cell-adhesion-molecule-binding	5.35443e-72	0.38897	1	1	5.10706e-68	4	go-cell-adhesion-molecule-binding
go-lung-morphogenesis	7.87627e-72	0.253655	0.971	0.31	7.51238e-68	4	go-lung-morphogenesis
go-regulation-of-actin-filament-bundle-assembly	1.4054e-71	1.05538	1	0.98	1.34047e-67	4	go-regulation-of-actin-filament-bundle-assembly
go-positive-regulation-of-defense-response	1.6172e-71	0.72327	1	0.999	1.54249e-67	4	go-positive-regulation-of-defense-response
go-regulation-of-protein-modification-process	1.05644e-70	0.357518	1	1	1.00763e-66	4	go-regulation-of-protein-modification-process
go-actin-based-cell-projection	3.79271e-70	1.13002	1	0.961	3.61749e-66	4	go-actin-based-cell-projection
go-tight-junction-organization	4.37761e-70	0.98391	1	0.979	4.17536e-66	4	go-tight-junction-organization
go-positive-regulation-of-kinase-activity	6.66649e-70	0.588826	1	1	6.3585e-66	4	go-positive-regulation-of-kinase-activity
go-regulation-of-proteolysis	1.38274e-69	0.438104	1	1	1.31886e-65	4	go-regulation-of-proteolysis
go-regulation-of-hemopoiesis	1.48696e-69	0.71592	1	0.998	1.41826e-65	4	go-regulation-of-hemopoiesis
go-regulation-of-cell-junction-assembly	1.60845e-69	0.622023	1	1	1.53414e-65	4	go-regulation-of-cell-junction-assembly
go-positive-regulation-of-molecular-function	2.11701e-69	0.316965	1	1	2.01921e-65	4	go-positive-regulation-of-molecular-function
go-negative-regulation-of-apoptotic-signaling-pathway	7.61569e-69	0.450229	1	1	7.26384e-65	4	go-negative-regulation-of-apoptotic-signaling-pathway
go-response-to-antibiotic	1.08226e-68	0.585587	1	1	1.03226e-64	4	go-response-to-antibiotic
go-activation-of-innate-immune-response	1.33866e-68	0.445607	1	1	1.27681e-64	4	go-activation-of-innate-immune-response
go-pattern-recognition-receptor-signaling-pathway	1.36763e-68	1.02626	1	0.993	1.30445e-64	4	go-pattern-recognition-receptor-signaling-pathway
go-epithelial-cell-development	2.52614e-68	0.758533	1	1	2.40943e-64	4	go-epithelial-cell-development
go-cadherin-binding	3.94317e-68	0.294234	1	1	3.761e-64	4	go-cadherin-binding
go-positive-regulation-of-protein-modification-process	4.56165e-68	0.541009	1	1	4.3509e-64	4	go-positive-regulation-of-protein-modification-process
go-regulation-of-response-to-cytokine-stimulus	5.98167e-68	1.13362	1	0.918	5.70531e-64	4	go-regulation-of-response-to-cytokine-stimulus
go-cellular-response-to-endogenous-stimulus	1.40153e-67	0.378433	1	1	1.33678e-63	4	go-cellular-response-to-endogenous-stimulus
go-regulation-of-stem-cell-differentiation	4.52622e-67	0.451227	1	1	4.31711e-63	4	go-regulation-of-stem-cell-differentiation
go-response-to-reactive-oxygen-species	9.21045e-67	0.577341	1	0.998	8.78492e-63	4	go-response-to-reactive-oxygen-species
go-cell-cell-adherens-junction	9.85165e-67	0.723227	1	0.999	9.3965e-63	4	go-cell-cell-adherens-junction
go-regulation-of-nik-nf-kappab-signaling	1.17281e-66	1.06775	1	0.982	1.11863e-62	4	go-regulation-of-nik-nf-kappab-signaling
go-regulation-of-viral-entry-into-host-cell	3.98457e-66	0.742623	0.996	0.428	3.80049e-62	4	go-regulation-of-viral-entry-into-host-cell
go-response-to-endogenous-stimulus	4.49076e-66	0.370534	1	1	4.28328e-62	4	go-response-to-endogenous-stimulus
go-stem-cell-differentiation	4.82008e-66	0.658862	1	0.998	4.59739e-62	4	go-stem-cell-differentiation
go-neural-tube-formation	2.01754e-65	1.01076	1	0.978	1.92433e-61	4	go-neural-tube-formation
go-negative-regulation-of-cell-adhesion	1.30708e-64	0.269697	0.971	0.319	1.24669e-60	4	go-negative-regulation-of-cell-adhesion
go-hepaticobiliary-system-development	2.6477e-64	0.697148	1	0.998	2.52537e-60	4	go-hepaticobiliary-system-development
go-nik-nf-kappab-signaling	3.70359e-64	0.414067	1	1	3.53248e-60	4	go-nik-nf-kappab-signaling
go-response-to-acid-chemical	2.4548e-63	0.73525	1	0.999	2.34139e-59	4	go-response-to-acid-chemical
go-regulation-of-cysteine-type-endopeptidase-activity	2.63083e-63	0.763626	1	0.999	2.50929e-59	4	go-regulation-of-cysteine-type-endopeptidase-activity
go-identical-protein-binding	2.70067e-63	0.31817	1	1	2.5759e-59	4	go-identical-protein-binding
go-morphogenesis-of-embryonic-epithelium	3.00657e-63	1.1882	1	0.91	2.86766e-59	4	go-morphogenesis-of-embryonic-epithelium
go-regulation-of-dna-binding-transcription-factor-activity	5.89826e-63	0.501059	1	1	5.62576e-59	4	go-regulation-of-dna-binding-transcription-factor-activity
go-rho-protein-signal-transduction	5.9573e-63	1.10812	1	0.918	5.68208e-59	4	go-rho-protein-signal-transduction
go-actin-filament-organization	6.64638e-63	0.4788	1	1	6.33931e-59	4	go-actin-filament-organization
go-anchoring-junction1	6.91189e-63	0.361073	1	1	6.59256e-59	4	go-anchoring-junction
go-positive-regulation-of-cell-matrix-adhesion	2.14213e-62	0.997271	1	0.981	2.04316e-58	4	go-positive-regulation-of-cell-matrix-adhesion
go-response-to-hydrogen-peroxide	2.83714e-62	0.668521	1	0.998	2.70606e-58	4	go-response-to-hydrogen-peroxide
go-response-to-osmotic-stress	4.05109e-62	1.03074	0.996	0.964	3.86393e-58	4	go-response-to-osmotic-stress
go-regulation-of-immune-response	5.77431e-62	1.21482	1	0.836	5.50754e-58	4	go-regulation-of-immune-response
go-extrinsic-apoptotic-signaling-pathway-via-death-domain-receptors	6.48833e-62	1.09477	1	0.874	6.18857e-58	4	go-extrinsic-apoptotic-signaling-pathway-via-death-domain-receptors
go-defense-response-to-virus	7.84235e-62	1.08178	1	0.825	7.48004e-58	4	go-defense-response-to-virus
go-cellular-response-to-mechanical-stimulus	1.27267e-61	0.976806	1	0.648	1.21387e-57	4	go-cellular-response-to-mechanical-stimulus
go-cellular-response-to-external-stimulus	4.07727e-61	0.50802	1	1	3.8889e-57	4	go-cellular-response-to-external-stimulus
go-cytokine-production	8.46704e-61	1.04127	1	0.629	8.07586e-57	4	go-cytokine-production
go-regulation-of-actomyosin-structure-organization	1.07572e-60	0.963551	1	0.982	1.02602e-56	4	go-regulation-of-actomyosin-structure-organization
go-response-to-type-i-interferon	3.25206e-60	0.906374	1	0.99	3.10181e-56	4	go-response-to-type-i-interferon
go-regulation-of-substrate-adhesion-dependent-cell-spreading	6.7954e-60	0.977204	1	0.963	6.48145e-56	4	go-regulation-of-substrate-adhesion-dependent-cell-spreading
go-interferon-gamma-mediated-signaling-pathway	9.47037e-60	1.13468	1	0.951	9.03284e-56	4	go-interferon-gamma-mediated-signaling-pathway
go-membrane-region	1.56002e-59	0.822033	1	0.999	1.48794e-55	4	go-membrane-region
go-basal-part-of-cell	1.67926e-59	1.13338	0.996	0.793	1.60168e-55	4	go-basal-part-of-cell
go-common-partner-smad-protein-phosphorylation	1.83659e-59	0.270303	0.84	0.277	1.75174e-55	4	go-common-partner-smad-protein-phosphorylation
go-regulation-of-protein-serine-threonine-kinase-activity	1.99618e-59	0.446228	1	1	1.90395e-55	4	go-regulation-of-protein-serine-threonine-kinase-activity
go-hemidesmosome-assembly	2.69652e-59	0.7619	0.996	0.445	2.57194e-55	4	go-hemidesmosome-assembly
go-positive-regulation-of-apoptotic-signaling-pathway	3.949e-59	0.4288	1	1	3.76656e-55	4	go-positive-regulation-of-apoptotic-signaling-pathway
go-cell-activation-involved-in-immune-response	7.81268e-59	0.422028	1	1	7.45174e-55	4	go-cell-activation-involved-in-immune-response
go-positive-regulation-of-cell-population-proliferation	9.60989e-59	0.616665	1	0.38	9.16591e-55	4	go-positive-regulation-of-cell-population-proliferation
go-positive-regulation-of-catalytic-activity	1.55688e-58	0.311141	1	1	1.48495e-54	4	go-positive-regulation-of-catalytic-activity
go-cellular-response-to-oxidative-stress	2.30331e-58	0.419758	1	1	2.1969e-54	4	go-cellular-response-to-oxidative-stress
go-positive-regulation-of-cell-junction-assembly	4.82086e-58	0.897692	1	0.995	4.59814e-54	4	go-positive-regulation-of-cell-junction-assembly
go-substrate-adhesion-dependent-cell-spreading	5.50583e-58	1.01075	1	0.932	5.25146e-54	4	go-substrate-adhesion-dependent-cell-spreading
go-cellular-response-to-reactive-oxygen-species	5.88026e-58	0.648161	1	0.998	5.60859e-54	4	go-cellular-response-to-reactive-oxygen-species
go-molecular-adaptor-activity	7.0948e-58	0.622171	1	0.997	6.76702e-54	4	go-molecular-adaptor-activity
go-monocarboxylic-acid-metabolic-process	1.48925e-57	1.04235	0.996	0.955	1.42045e-53	4	go-monocarboxylic-acid-metabolic-process
go-leukocyte-mediated-immunity	2.00741e-57	0.582777	1	1	1.91467e-53	4	go-leukocyte-mediated-immunity
go-toll-like-receptor-signaling-pathway	2.22542e-57	0.983799	1	0.988	2.12261e-53	4	go-toll-like-receptor-signaling-pathway
go-positive-regulation-of-wnt-signaling-pathway	3.32672e-57	0.350528	1	1	3.17302e-53	4	go-positive-regulation-of-wnt-signaling-pathway
go-cell-cell-signaling-by-wnt	4.10242e-57	0.338726	1	1	3.91289e-53	4	go-cell-cell-signaling-by-wnt
go-regulation-of-transferase-activity	4.25825e-57	0.322707	1	1	4.06152e-53	4	go-regulation-of-transferase-activity
go-cellular-response-to-ether	5.30004e-57	0.263003	0.819	0.261	5.05518e-53	4	go-cellular-response-to-ether
go-activation-of-protein-kinase-activity	6.07178e-57	0.743194	1	0.996	5.79126e-53	4	go-activation-of-protein-kinase-activity
go-positive-regulation-of-viral-entry-into-host-cell	7.09293e-57	0.514929	0.971	0.397	6.76524e-53	4	go-positive-regulation-of-viral-entry-into-host-cell
go-positive-regulation-of-cellular-component-biogenesis	7.99076e-57	0.341999	1	1	7.62159e-53	4	go-positive-regulation-of-cellular-component-biogenesis
go-kinase-binding	9.81216e-57	0.268149	1	1	9.35884e-53	4	go-kinase-binding
go-proteolysis	3.87264e-56	0.292531	1	1	3.69372e-52	4	go-proteolysis
go-response-to-oxidative-stress	7.67216e-56	0.377868	1	1	7.3177e-52	4	go-response-to-oxidative-stress
go-rho-gtpase-binding	9.36969e-56	0.769189	1	0.989	8.93681e-52	4	go-rho-gtpase-binding
go-protein-complex-oligomerization	2.2803e-55	0.533612	1	1	2.17495e-51	4	go-protein-complex-oligomerization
go-placenta-development	2.36961e-55	0.883957	1	0.994	2.26014e-51	4	go-placenta-development
go-establishment-or-maintenance-of-cell-polarity	3.38353e-55	0.379752	1	1	3.22721e-51	4	go-establishment-or-maintenance-of-cell-polarity
go-positive-regulation-of-developmental-process1	4.31152e-55	1.04401	1	0.965	4.11233e-51	4	go-positive-regulation-of-developmental-process
go-positive-regulation-of-nf-kappab-transcription-factor-activity	4.60681e-55	0.775828	1	1	4.39397e-51	4	go-positive-regulation-of-nf-kappab-transcription-factor-activity
go-aging	4.82869e-55	0.635826	1	0.996	4.6056e-51	4	go-aging
go-modification-of-morphology-or-physiology-of-other-organism-involved-in-symbiotic-interaction	1.10696e-54	0.537018	1	0.999	1.05582e-50	4	go-modification-of-morphology-or-physiology-of-other-organism-involved-in-symbiotic-interaction
go-adherens-junction-assembly	2.3248e-54	0.551435	1	1	2.2174e-50	4	go-adherens-junction-assembly
go-regulation-of-erbb-signaling-pathway	2.34871e-54	0.812218	1	0.988	2.2402e-50	4	go-regulation-of-erbb-signaling-pathway
go-vascular-endothelial-growth-factor-receptor-signaling-pathway	3.28009e-54	0.806318	1	0.997	3.12855e-50	4	go-vascular-endothelial-growth-factor-receptor-signaling-pathway
go-negative-regulation-of-mapk-cascade	6.19146e-54	0.622705	1	0.997	5.90541e-50	4	go-negative-regulation-of-mapk-cascade
go-in-utero-embryonic-development	8.10097e-54	0.380921	1	1	7.72671e-50	4	go-in-utero-embryonic-development
go-negative-regulation-of-protein-metabolic-process	1.94332e-53	0.29879	1	1	1.85354e-49	4	go-negative-regulation-of-protein-metabolic-process
go-cellular-response-to-antibiotic	2.50913e-53	0.649714	1	0.998	2.39321e-49	4	go-cellular-response-to-antibiotic
go-negative-regulation-of-cellular-response-to-transforming-growth-factor-beta-stimulus	7.54856e-53	0.987642	1	0.956	7.19981e-49	4	go-negative-regulation-of-cellular-response-to-transforming-growth-factor-beta-stimulus
go-actin-filament-based-process	9.71488e-53	0.420701	1	1	9.26605e-49	4	go-actin-filament-based-process
go-positive-regulation-of-protein-serine-threonine-kinase-activity	5.22829e-52	0.692685	1	0.997	4.98674e-48	4	go-positive-regulation-of-protein-serine-threonine-kinase-activity
go-regulation-of-reactive-oxygen-species-metabolic-process	5.91908e-52	0.951751	0.996	0.977	5.64562e-48	4	go-regulation-of-reactive-oxygen-species-metabolic-process
go-contractile-actin-filament-bundle-assembly	6.04546e-52	0.878835	1	0.985	5.76616e-48	4	go-contractile-actin-filament-bundle-assembly
go-renal-system-development	6.97397e-52	0.744581	1	0.465	6.65177e-48	4	go-renal-system-development
go-notch-signaling-pathway	1.03581e-51	0.967038	1	0.98	9.87956e-48	4	go-notch-signaling-pathway
go-positive-regulation-of-viral-life-cycle	1.3736e-51	0.338911	1	1	1.31014e-47	4	go-positive-regulation-of-viral-life-cycle
go-myeloid-cell-differentiation	2.58623e-51	0.571886	1	0.999	2.46675e-47	4	go-myeloid-cell-differentiation
go-regulation-of-stress-activated-protein-kinase-signaling-cascade	2.93352e-51	0.796245	1	0.995	2.79799e-47	4	go-regulation-of-stress-activated-protein-kinase-signaling-cascade
go-response-to-oxygen-containing-compound	3.14793e-51	0.332887	1	1	3.0025e-47	4	go-response-to-oxygen-containing-compound
go-cellular-response-to-acid-chemical	3.36995e-51	1.01175	1	0.922	3.21426e-47	4	go-cellular-response-to-acid-chemical
go-cellular-response-to-hydrogen-peroxide	3.61341e-51	0.933068	0.996	0.959	3.44647e-47	4	go-cellular-response-to-hydrogen-peroxide
go-cellular-response-to-drug	7.26519e-51	0.832755	1	0.995	6.92954e-47	4	go-cellular-response-to-drug
go-negative-regulation-of-phosphorylation	9.99843e-51	0.343387	1	1	9.5365e-47	4	go-negative-regulation-of-phosphorylation
go-reproductive-system-development	1.22987e-50	0.880738	1	0.997	1.17305e-46	4	go-reproductive-system-development
go-cortical-actin-cytoskeleton	5.48771e-50	0.61673	1	0.999	5.23418e-46	4	go-cortical-actin-cytoskeleton
go-t-cell-receptor-signaling-pathway	6.88646e-50	0.487682	1	1	6.56831e-46	4	go-t-cell-receptor-signaling-pathway
go-locomotion	1.02666e-49	1.03013	0.992	0.522	9.79229e-46	4	go-locomotion
go-tumor-necrosis-factor-mediated-signaling-pathway	1.03467e-49	0.40039	1	1	9.86868e-46	4	go-tumor-necrosis-factor-mediated-signaling-pathway
go-neural-tube-development	1.78565e-49	0.999893	1	0.958	1.70316e-45	4	go-neural-tube-development
go-lateral-plasma-membrane	2.99733e-49	0.95742	1	0.959	2.85885e-45	4	go-lateral-plasma-membrane
go-transmembrane-receptor-protein-serine-threonine-kinase-signaling-pathway	3.01421e-49	1.02397	1	0.918	2.87495e-45	4	go-transmembrane-receptor-protein-serine-threonine-kinase-signaling-pathway
go-actomyosin-structure-organization	3.90047e-49	0.757908	1	0.997	3.72027e-45	4	go-actomyosin-structure-organization
go-small-gtpase-mediated-signal-transduction	8.55862e-49	0.378236	1	1	8.16321e-45	4	go-small-gtpase-mediated-signal-transduction
go-stress-activated-protein-kinase-signaling-cascade	9.01903e-49	0.405251	1	1	8.60235e-45	4	go-stress-activated-protein-kinase-signaling-cascade
go-regulation-of-peptidase-activity	1.0174e-48	1.11192	1	0.875	9.70396e-45	4	go-regulation-of-peptidase-activity
go-adherens-junction-organization	1.96664e-48	0.530506	1	0.999	1.87578e-44	4	go-adherens-junction-organization
go-pri-mirna-transcription-by-rna-polymerase-ii	2.13411e-48	1.03656	1	0.891	2.03551e-44	4	go-pri-mirna-transcription-by-rna-polymerase-ii
go-regulation-of-ras-protein-signal-transduction	2.98707e-48	0.836409	1	0.968	2.84906e-44	4	go-regulation-of-ras-protein-signal-transduction
go-urogenital-system-development	4.54899e-48	0.763087	1	0.498	4.33883e-44	4	go-urogenital-system-development
go-maintenance-of-cell-number	5.24789e-48	0.560919	1	0.997	5.00544e-44	4	go-maintenance-of-cell-number
go-tertiary-granule	5.64571e-48	0.518865	1	1	5.38488e-44	4	go-tertiary-granule
go-positive-regulation-of-multicellular-organismal-process1	1.25614e-47	0.981834	1	0.968	1.1981e-43	4	go-positive-regulation-of-multicellular-organismal-process
go-positive-regulation-of-protein-import	4.28805e-47	0.758222	1	0.985	4.08994e-43	4	go-positive-regulation-of-protein-import
go-positive-regulation-of-transferase-activity	1.40506e-46	0.340661	1	1	1.34014e-42	4	go-positive-regulation-of-transferase-activity
go-modification-of-morphology-or-physiology-of-other-organism	1.47172e-46	0.780115	1	0.995	1.40373e-42	4	go-modification-of-morphology-or-physiology-of-other-organism
go-apical-plasma-membrane	2.09289e-46	0.803192	0.975	0.417	1.9962e-42	4	go-apical-plasma-membrane
go-regulation-of-viral-genome-replication	4.05149e-46	0.534447	1	1	3.86431e-42	4	go-regulation-of-viral-genome-replication
go-response-to-organic-cyclic-compound	4.22928e-46	0.337921	1	1	4.03389e-42	4	go-response-to-organic-cyclic-compound
go-positive-regulation-of-map-kinase-activity	9.02459e-46	0.957271	1	0.967	8.60765e-42	4	go-positive-regulation-of-map-kinase-activity
go-ras-protein-signal-transduction	1.20502e-45	0.348905	1	1	1.14934e-41	4	go-ras-protein-signal-transduction
go-tube-closure	1.85429e-45	1.00223	1	0.951	1.76862e-41	4	go-tube-closure
go-positive-regulation-of-proteolysis	2.08845e-45	0.359504	1	1	1.99196e-41	4	go-positive-regulation-of-proteolysis
go-epithelial-cell-proliferation	2.47594e-45	0.312111	0.992	0.371	2.36155e-41	4	go-epithelial-cell-proliferation
go-cellular-response-to-oxygen-containing-compound	4.65569e-45	0.316789	1	1	4.4406e-41	4	go-cellular-response-to-oxygen-containing-compound
go-myeloid-leukocyte-mediated-immunity	6.31421e-45	0.302035	1	1	6.02249e-41	4	go-myeloid-leukocyte-mediated-immunity
go-negative-regulation-of-hydrolase-activity	8.1494e-45	1.00556	1	0.98	7.7729e-41	4	go-negative-regulation-of-hydrolase-activity
go-negative-regulation-of-viral-process	9.01771e-45	0.985079	1	0.831	8.60109e-41	4	go-negative-regulation-of-viral-process
go-regulation-of-animal-organ-morphogenesis	9.12752e-45	0.419481	1	0.999	8.70583e-41	4	go-regulation-of-animal-organ-morphogenesis
go-tertiary-granule-lumen	4.23881e-44	0.787042	1	0.993	4.04297e-40	4	go-tertiary-granule-lumen
go-interaction-with-symbiont	6.38709e-44	0.509495	1	0.999	6.09201e-40	4	go-interaction-with-symbiont
go-morphogenesis-of-an-epithelial-sheet	6.865e-44	0.869441	1	0.968	6.54784e-40	4	go-morphogenesis-of-an-epithelial-sheet
go-filopodium	7.86201e-44	0.591092	1	0.999	7.49878e-40	4	go-filopodium
go-protein-kinase-activity	8.85798e-44	0.58992	1	0.995	8.44874e-40	4	go-protein-kinase-activity
go-positive-regulation-of-hydrolase-activity	1.25664e-43	0.308941	1	1	1.19858e-39	4	go-positive-regulation-of-hydrolase-activity
go-oxidoreductase-activity-acting-on-the-ch-ch-group-of-donors	3.2321e-43	0.968745	0.992	0.888	3.08278e-39	4	go-oxidoreductase-activity-acting-on-the-ch-ch-group-of-donors
go-establishment-of-endothelial-barrier	8.0812e-43	0.809599	1	0.98	7.70785e-39	4	go-establishment-of-endothelial-barrier
go-positive-regulation-of-canonical-wnt-signaling-pathway	8.15984e-43	0.295311	1	1	7.78285e-39	4	go-positive-regulation-of-canonical-wnt-signaling-pathway
go-negative-regulation-of-phosphorus-metabolic-process	3.7892e-42	0.279696	1	1	3.61414e-38	4	go-negative-regulation-of-phosphorus-metabolic-process
go-positive-regulation-of-peptidase-activity	7.93903e-42	0.742548	1	0.994	7.57224e-38	4	go-positive-regulation-of-peptidase-activity
go-response-to-antineoplastic-agent	1.14445e-41	0.542936	1	0.999	1.09158e-37	4	go-response-to-antineoplastic-agent
go-ameboidal-type-cell-migration	1.39264e-41	0.962204	1	0.886	1.3283e-37	4	go-ameboidal-type-cell-migration
go-gastrulation	1.55672e-41	0.912414	0.996	0.791	1.4848e-37	4	go-gastrulation
go-viral-genome-replication	1.55683e-41	0.328236	1	1	1.48491e-37	4	go-viral-genome-replication
go-cellular-response-to-organic-cyclic-compound	1.79911e-41	0.300643	1	1	1.71599e-37	4	go-cellular-response-to-organic-cyclic-compound
go-regulation-of-protein-import	1.99003e-41	0.647411	1	0.994	1.89809e-37	4	go-regulation-of-protein-import
go-cell-substrate-junction1	2.98657e-41	0.269038	1	1	2.84859e-37	4	go-cell-substrate-junction
go-myeloid-leukocyte-activation	3.5976e-41	0.328663	1	1	3.43139e-37	4	go-myeloid-leukocyte-activation
go-cellular-response-to-toxic-substance	5.79363e-41	0.630595	1	0.995	5.52596e-37	4	go-cellular-response-to-toxic-substance
go-ruffle	8.60983e-41	0.290376	1	1	8.21206e-37	4	go-ruffle
go-molecular-function-regulator	2.06111e-40	0.633097	1	0.998	1.96589e-36	4	go-molecular-function-regulator
go-positive-regulation-of-protein-localization-to-membrane	2.81106e-40	0.648841	1	0.998	2.68119e-36	4	go-positive-regulation-of-protein-localization-to-membrane
go-protein-kinase-b-signaling	6.48462e-40	0.344445	0.979	0.412	6.18503e-36	4	go-protein-kinase-b-signaling
go-cell-cortex	6.66152e-40	0.293383	1	1	6.35376e-36	4	go-cell-cortex
go-negative-regulation-of-cell-population-proliferation	7.18752e-40	1.00284	1	0.874	6.85545e-36	4	go-negative-regulation-of-cell-population-proliferation
go-exocrine-system-development	1.4862e-39	0.62017	0.984	0.488	1.41754e-35	4	go-exocrine-system-development
go-positive-regulation-of-actin-filament-bundle-assembly	5.24726e-39	0.936777	1	0.951	5.00484e-35	4	go-positive-regulation-of-actin-filament-bundle-assembly
go-negative-regulation-of-cysteine-type-endopeptidase-activity	5.69193e-39	0.744472	1	0.995	5.42897e-35	4	go-negative-regulation-of-cysteine-type-endopeptidase-activity
go-heart-morphogenesis	6.20043e-39	0.296098	0.992	0.395	5.91397e-35	4	go-heart-morphogenesis
go-response-to-ketone	7.99273e-39	0.691986	1	0.999	7.62347e-35	4	go-response-to-ketone
go-ruffle-organization	1.54511e-38	0.74776	1	0.981	1.47372e-34	4	go-ruffle-organization
go-positive-regulation-of-rna-biosynthetic-process	2.12284e-38	0.278115	1	1	2.02477e-34	4	go-positive-regulation-of-rna-biosynthetic-process
go-cell-projection-assembly	2.24284e-38	0.357865	1	1	2.13923e-34	4	go-cell-projection-assembly
go-cytoskeleton-organization	2.90109e-38	0.278683	1	1	2.76706e-34	4	go-cytoskeleton-organization
go-negative-regulation-of-dna-binding-transcription-factor-activity	7.32501e-38	0.705605	1	0.986	6.98659e-34	4	go-negative-regulation-of-dna-binding-transcription-factor-activity
go-basal-plasma-membrane	2.92633e-37	0.749253	1	0.505	2.79113e-33	4	go-basal-plasma-membrane
go-inositol-lipid-mediated-signaling	6.07657e-37	0.481807	0.996	0.482	5.79584e-33	4	go-inositol-lipid-mediated-signaling
go-regulation-of-protein-localization-to-membrane	9.57785e-37	0.336172	1	1	9.13535e-33	4	go-regulation-of-protein-localization-to-membrane
go-lipid-metabolic-process	1.84144e-36	0.388942	1	1	1.75636e-32	4	go-lipid-metabolic-process
go-response-to-fibroblast-growth-factor	2.48875e-36	0.72886	1	0.994	2.37377e-32	4	go-response-to-fibroblast-growth-factor
go-labyrinthine-layer-development	6.30552e-36	0.80365	1	0.988	6.0142e-32	4	go-labyrinthine-layer-development
go-cellular-aldehyde-metabolic-process	8.56256e-36	0.884849	1	0.99	8.16697e-32	4	go-cellular-aldehyde-metabolic-process
go-transforming-growth-factor-beta2-production	1.27235e-35	0.518394	0.922	0.473	1.21356e-31	4	go-transforming-growth-factor-beta2-production
go-positive-regulation-of-mapk-cascade	2.43535e-35	0.450449	0.979	0.433	2.32283e-31	4	go-positive-regulation-of-mapk-cascade
go-positive-regulation-of-transcription-by-rna-polymerase-ii	3.14478e-35	0.307486	1	1	2.99949e-31	4	go-positive-regulation-of-transcription-by-rna-polymerase-ii
go-positive-regulation-of-multi-organism-process	4.76083e-35	0.285831	1	1	4.54088e-31	4	go-positive-regulation-of-multi-organism-process
go-positive-regulation-of-dna-binding-transcription-factor-activity	6.95579e-35	0.440194	1	1	6.63443e-31	4	go-positive-regulation-of-dna-binding-transcription-factor-activity
go-apical-part-of-cell	1.4858e-34	1.12579	0.992	0.645	1.41716e-30	4	go-apical-part-of-cell
go-negative-regulation-of-kinase-activity	2.6085e-34	0.339376	1	1	2.48799e-30	4	go-negative-regulation-of-kinase-activity
go-cellular-lipid-metabolic-process1	2.91339e-34	0.483985	1	0.997	2.77879e-30	4	go-cellular-lipid-metabolic-process
go-regulation-of-ruffle-assembly	3.67091e-34	0.897044	1	0.939	3.50131e-30	4	go-regulation-of-ruffle-assembly
go-intrinsic-apoptotic-signaling-pathway-in-response-to-dna-damage-by-p53-class-mediator	3.9805e-34	0.540115	1	0.996	3.7966e-30	4	go-intrinsic-apoptotic-signaling-pathway-in-response-to-dna-damage-by-p53-class-mediator
go-regulation-of-actin-filament-organization	4.61068e-34	0.302723	1	1	4.39767e-30	4	go-regulation-of-actin-filament-organization
go-positive-regulation-of-nucleocytoplasmic-transport	5.3037e-34	0.357075	1	0.999	5.05866e-30	4	go-positive-regulation-of-nucleocytoplasmic-transport
go-negative-regulation-of-proteolysis1	5.47891e-34	0.737968	1	0.987	5.22578e-30	4	go-negative-regulation-of-proteolysis
go-negative-regulation-of-erk1-and-erk2-cascade	6.22498e-34	0.943361	0.996	0.856	5.93739e-30	4	go-negative-regulation-of-erk1-and-erk2-cascade
go-cellular-response-to-steroid-hormone-stimulus	4.01079e-33	0.285438	1	1	3.82549e-29	4	go-cellular-response-to-steroid-hormone-stimulus
go-signaling-receptor-binding	7.18211e-33	0.408093	0.922	0.383	6.8503e-29	4	go-signaling-receptor-binding
go-phosphatase-binding	9.95123e-33	0.251346	1	1	9.49148e-29	4	go-phosphatase-binding
go-basolateral-plasma-membrane	1.0959e-32	1.13164	1	0.831	1.04527e-28	4	go-basolateral-plasma-membrane
go-response-to-toxic-substance	2.0667e-32	0.403888	1	0.998	1.97122e-28	4	go-response-to-toxic-substance
go-membrane-protein-proteolysis	2.20371e-32	0.611211	0.996	0.989	2.1019e-28	4	go-membrane-protein-proteolysis
go-enhancer-binding	2.52093e-32	0.602773	1	0.996	2.40446e-28	4	go-enhancer-binding
go-type-i-interferon-production	3.02579e-32	0.380532	1	0.999	2.886e-28	4	go-type-i-interferon-production
go-positive-regulation-of-reactive-oxygen-species-metabolic-process	5.99574e-32	0.887482	0.996	0.787	5.71874e-28	4	go-positive-regulation-of-reactive-oxygen-species-metabolic-process
go-regulation-of-defense-response-to-virus	8.84651e-32	0.829543	1	0.947	8.4378e-28	4	go-regulation-of-defense-response-to-virus
go-oxidoreductase-activity-acting-on-the-ch-ch-group-of-donors-nad-or-nadp-as-acceptor	9.55133e-32	0.909295	0.979	0.746	9.11005e-28	4	go-oxidoreductase-activity-acting-on-the-ch-ch-group-of-donors-nad-or-nadp-as-acceptor
go-integrin-binding	9.73895e-32	0.254379	0.988	0.404	9.28901e-28	4	go-integrin-binding
go-smad-binding	1.30772e-31	0.343028	1	1	1.24731e-27	4	go-smad-binding
go-gliogenesis	1.48541e-31	0.974164	1	0.965	1.41678e-27	4	go-gliogenesis
go-positive-regulation-of-response-to-cytokine-stimulus	1.82877e-31	0.875144	1	0.886	1.74428e-27	4	go-positive-regulation-of-response-to-cytokine-stimulus
go-protease-binding	2.26299e-31	0.459898	1	1	2.15844e-27	4	go-protease-binding
go-establishment-of-endothelial-intestinal-barrier	3.27431e-31	0.820582	0.988	0.717	3.12304e-27	4	go-establishment-of-endothelial-intestinal-barrier
go-podosome	1.42028e-30	0.851605	1	0.945	1.35467e-26	4	go-podosome
go-response-to-drug1	2.44107e-30	0.446003	1	0.999	2.32829e-26	4	go-response-to-drug
go-salivary-gland-development	3.23105e-30	0.32008	0.971	0.447	3.08177e-26	4	go-salivary-gland-development
go-regulation-of-cellular-response-to-growth-factor-stimulus	3.79627e-30	0.525043	0.996	0.524	3.62088e-26	4	go-regulation-of-cellular-response-to-growth-factor-stimulus
go-regulation-of-actin-filament-based-process	5.05506e-30	0.313116	1	1	4.82152e-26	4	go-regulation-of-actin-filament-based-process
go-hepatocyte-apoptotic-process	1.33775e-29	0.78365	1	0.898	1.27595e-25	4	go-hepatocyte-apoptotic-process
go-regulation-of-protein-localization-to-plasma-membrane	2.0888e-29	0.337289	1	0.999	1.9923e-25	4	go-regulation-of-protein-localization-to-plasma-membrane
go-gland-morphogenesis	2.23556e-29	0.54641	1	0.532	2.13228e-25	4	go-gland-morphogenesis
go-peptidyl-threonine-modification	2.39913e-29	0.449793	1	0.997	2.28829e-25	4	go-peptidyl-threonine-modification
go-lipid-droplet	3.36009e-29	0.484348	1	0.999	3.20485e-25	4	go-lipid-droplet
go-intrinsic-apoptotic-signaling-pathway-in-response-to-dna-damage	4.32337e-29	0.528362	1	1	4.12363e-25	4	go-intrinsic-apoptotic-signaling-pathway-in-response-to-dna-damage
go-positive-regulation-of-response-to-endoplasmic-reticulum-stress	4.51141e-29	0.517513	1	0.993	4.30298e-25	4	go-positive-regulation-of-response-to-endoplasmic-reticulum-stress
go-negative-regulation-of-transferase-activity	5.21648e-29	0.271324	1	1	4.97547e-25	4	go-negative-regulation-of-transferase-activity
go-negative-regulation-of-small-gtpase-mediated-signal-transduction	7.16826e-29	0.76928	1	0.974	6.83708e-25	4	go-negative-regulation-of-small-gtpase-mediated-signal-transduction
go-regulation-of-extrinsic-apoptotic-signaling-pathway-via-death-domain-receptors	8.09411e-29	0.510815	0.988	0.526	7.72016e-25	4	go-regulation-of-extrinsic-apoptotic-signaling-pathway-via-death-domain-receptors
go-homeostasis-of-number-of-cells	1.97546e-28	0.458611	1	0.998	1.8842e-24	4	go-homeostasis-of-number-of-cells
go-oxidoreductase-activity-acting-on-ch-oh-group-of-donors	3.4562e-28	0.7087	0.988	0.965	3.29653e-24	4	go-oxidoreductase-activity-acting-on-ch-oh-group-of-donors
go-regulation-of-nucleocytoplasmic-transport	1.43546e-27	0.257349	1	1	1.36915e-23	4	go-regulation-of-nucleocytoplasmic-transport
go-positive-regulation-of-substrate-adhesion-dependent-cell-spreading	1.58714e-27	0.844381	1	0.949	1.51382e-23	4	go-positive-regulation-of-substrate-adhesion-dependent-cell-spreading
go-cytoplasmic-pattern-recognition-receptor-signaling-pathway	2.69027e-27	0.502652	1	1	2.56598e-23	4	go-cytoplasmic-pattern-recognition-receptor-signaling-pathway
go-movement-in-environment-of-other-organism-involved-in-symbiotic-interaction	4.13327e-27	0.360271	1	0.998	3.94231e-23	4	go-movement-in-environment-of-other-organism-involved-in-symbiotic-interaction
go-lipid-biosynthetic-process	8.16086e-27	0.316667	1	1	7.78383e-23	4	go-lipid-biosynthetic-process
go-costamere	9.16547e-27	0.683209	0.996	0.622	8.74203e-23	4	go-costamere
go-positive-regulation-of-fibroblast-proliferation	1.01739e-26	0.380097	0.992	0.491	9.70386e-23	4	go-positive-regulation-of-fibroblast-proliferation
go-cofactor-binding	1.19188e-26	0.538799	0.996	0.995	1.13681e-22	4	go-cofactor-binding
go-intrinsic-apoptotic-signaling-pathway-in-response-to-endoplasmic-reticulum-stress	2.40104e-26	0.490513	1	0.997	2.29011e-22	4	go-intrinsic-apoptotic-signaling-pathway-in-response-to-endoplasmic-reticulum-stress
go-endothelium-development	4.25853e-26	0.893139	1	0.864	4.06179e-22	4	go-endothelium-development
go-cortical-cytoskeleton	4.94346e-26	0.41099	1	1	4.71508e-22	4	go-cortical-cytoskeleton
go-negative-regulation-of-wnt-signaling-pathway	5.33183e-26	0.379827	1	0.997	5.0855e-22	4	go-negative-regulation-of-wnt-signaling-pathway
go-positive-regulation-of-cellular-response-to-transforming-growth-factor-beta-stimulus	6.58512e-26	0.719337	1	0.985	6.28089e-22	4	go-positive-regulation-of-cellular-response-to-transforming-growth-factor-beta-stimulus
go-kinase-activity	6.79907e-26	0.341595	1	0.999	6.48496e-22	4	go-kinase-activity
go-protein-autophosphorylation	7.0854e-26	0.35927	1	0.999	6.75806e-22	4	go-protein-autophosphorylation
go-interferon-beta-production	8.51182e-26	0.798051	0.996	0.95	8.11857e-22	4	go-interferon-beta-production
go-jnk-cascade	8.6452e-26	0.586836	1	0.996	8.24579e-22	4	go-jnk-cascade
go-positive-regulation-of-cell-substrate-adhesion	9.00265e-26	0.948621	1	0.864	8.58673e-22	4	go-positive-regulation-of-cell-substrate-adhesion
go-ruffle-assembly	1.08014e-25	0.754774	1	0.958	1.03024e-21	4	go-ruffle-assembly
go-negative-regulation-of-erbb-signaling-pathway	3.51953e-25	0.500287	1	0.993	3.35693e-21	4	go-negative-regulation-of-erbb-signaling-pathway
go-response-to-nutrient	4.31744e-25	0.780263	1	0.969	4.11797e-21	4	go-response-to-nutrient
go-n-acetyllactosamine-synthase-activity	4.85297e-25	0.281078	0.852	0.416	4.62877e-21	4	go-n-acetyllactosamine-synthase-activity
go-oxidoreductase-activity-acting-on-the-aldehyde-or-oxo-group-of-donors-nad-or-nadp-as-acceptor	5.8607e-25	0.599461	0.996	0.996	5.58994e-21	4	go-oxidoreductase-activity-acting-on-the-aldehyde-or-oxo-group-of-donors-nad-or-nadp-as-acceptor
go-reactive-oxygen-species-metabolic-process	1.47668e-24	0.853102	0.996	0.934	1.40846e-20	4	go-reactive-oxygen-species-metabolic-process
go-positive-regulation-of-early-endosome-to-late-endosome-transport	2.58839e-24	0.698861	0.988	0.843	2.4688e-20	4	go-positive-regulation-of-early-endosome-to-late-endosome-transport
go-carbohydrate-derivative-metabolic-process	2.62264e-24	0.300944	1	0.999	2.50148e-20	4	go-carbohydrate-derivative-metabolic-process
go-response-to-uv	7.49882e-24	0.535979	1	0.985	7.15237e-20	4	go-response-to-uv
go-establishment-or-maintenance-of-cytoskeleton-polarity	1.02281e-23	0.858595	1	0.877	9.75555e-20	4	go-establishment-or-maintenance-of-cytoskeleton-polarity
go-response-to-amino-acid	1.04582e-23	0.314037	1	1	9.97498e-20	4	go-response-to-amino-acid
go-cysteine-type-peptidase-activity	1.20892e-23	0.543658	1	0.984	1.15307e-19	4	go-cysteine-type-peptidase-activity
go-positive-regulation-of-cell-differentiation1	1.59175e-23	0.44897	1	0.999	1.51821e-19	4	go-positive-regulation-of-cell-differentiation
go-somatic-stem-cell-population-maintenance	1.85964e-23	0.874686	0.996	0.939	1.77373e-19	4	go-somatic-stem-cell-population-maintenance
go-tissue-migration	2.52486e-23	0.809914	1	0.78	2.40821e-19	4	go-tissue-migration
go-release-of-cytochrome-c-from-mitochondria	2.94041e-23	0.631483	0.996	0.979	2.80456e-19	4	go-release-of-cytochrome-c-from-mitochondria
go-negative-regulation-of-i-kappab-kinase-nf-kappab-signaling	5.82751e-23	0.855705	0.996	0.92	5.55828e-19	4	go-negative-regulation-of-i-kappab-kinase-nf-kappab-signaling
go-glycoprotein-biosynthetic-process	6.98375e-23	0.533405	1	0.99	6.6611e-19	4	go-glycoprotein-biosynthetic-process
go-transforming-growth-factor-beta-production	1.20591e-22	0.865819	1	0.983	1.1502e-18	4	go-transforming-growth-factor-beta-production
go-regulation-of-cell-shape	1.28121e-22	0.391885	1	0.999	1.22202e-18	4	go-regulation-of-cell-shape
go-lumenal-side-of-membrane	2.02294e-22	0.587323	1	0.998	1.92948e-18	4	go-lumenal-side-of-membrane
go-negative-regulation-of-protein-serine-threonine-kinase-activity	2.5973e-22	0.430324	1	0.997	2.47731e-18	4	go-negative-regulation-of-protein-serine-threonine-kinase-activity
go-fatty-acid-metabolic-process	3.58559e-22	0.627611	0.992	0.973	3.41994e-18	4	go-fatty-acid-metabolic-process
go-response-to-ionizing-radiation	6.47428e-22	0.541155	1	0.987	6.17517e-18	4	go-response-to-ionizing-radiation
go-endoderm-development	7.95975e-22	0.375064	0.988	0.501	7.59201e-18	4	go-endoderm-development
go-positive-regulation-of-cysteine-type-endopeptidase-activity	9.58114e-22	0.707916	1	0.979	9.13849e-18	4	go-positive-regulation-of-cysteine-type-endopeptidase-activity
go-perk-mediated-unfolded-protein-response	1.15402e-21	0.537898	1	0.985	1.1007e-17	4	go-perk-mediated-unfolded-protein-response
go-regulation-of-protein-localization-to-cell-periphery	1.83079e-21	0.279493	1	0.999	1.74621e-17	4	go-regulation-of-protein-localization-to-cell-periphery
go-membrane-protein-ectodomain-proteolysis	2.27528e-21	0.646316	0.996	0.981	2.17016e-17	4	go-membrane-protein-ectodomain-proteolysis
go-sphingolipid-metabolic-process	3.1146e-21	0.398924	1	0.996	2.9707e-17	4	go-sphingolipid-metabolic-process
go-negative-regulation-of-stem-cell-differentiation	3.24823e-21	0.866464	1	0.886	3.09816e-17	4	go-negative-regulation-of-stem-cell-differentiation
go-cellular-response-to-corticosteroid-stimulus	4.68548e-21	0.756918	1	0.946	4.46902e-17	4	go-cellular-response-to-corticosteroid-stimulus
go-positive-regulation-by-host-of-viral-process	5.68161e-21	0.429058	1	0.999	5.41912e-17	4	go-positive-regulation-by-host-of-viral-process
go-desmosome	1.28206e-20	0.684508	1	0.989	1.22283e-16	4	go-desmosome
go-cellular-response-to-radiation	1.37079e-20	0.433278	1	0.998	1.30746e-16	4	go-cellular-response-to-radiation
go-fibroblast-proliferation	1.5323e-20	0.773362	1	0.787	1.46151e-16	4	go-fibroblast-proliferation
go-regulation-of-protein-tyrosine-kinase-activity	1.65605e-20	0.493784	0.979	0.57	1.57954e-16	4	go-regulation-of-protein-tyrosine-kinase-activity
go-protein-containing-complex-scaffold-activity	2.36331e-20	0.363287	1	0.997	2.25412e-16	4	go-protein-containing-complex-scaffold-activity
go-regulation-of-exosomal-secretion	2.44277e-20	0.53813	1	0.983	2.32991e-16	4	go-regulation-of-exosomal-secretion
go-ruffle-membrane	2.97811e-20	0.410613	1	1	2.84052e-16	4	go-ruffle-membrane
go-intrinsic-apoptotic-signaling-pathway-by-p53-class-mediator	4.21454e-20	0.323412	1	1	4.01983e-16	4	go-intrinsic-apoptotic-signaling-pathway-by-p53-class-mediator
go-embryonic-morphogenesis	5.62009e-20	0.675268	1	0.696	5.36044e-16	4	go-embryonic-morphogenesis
go-brush-border	9.50971e-20	0.82868	1	0.978	9.07037e-16	4	go-brush-border
go-specific-granule-lumen	1.11476e-19	0.869903	1	0.899	1.06326e-15	4	go-specific-granule-lumen
go-organic-acid-metabolic-process	1.31971e-19	0.277103	1	1	1.25874e-15	4	go-organic-acid-metabolic-process
go-steroid-metabolic-process	3.22811e-19	0.692401	0.996	0.99	3.07897e-15	4	go-steroid-metabolic-process
go-fat-cell-differentiation	3.40866e-19	0.792928	0.992	0.876	3.25118e-15	4	go-fat-cell-differentiation
go-cell-cycle-g1-s-phase-transition	3.72209e-19	0.450257	1	0.99	3.55013e-15	4	go-cell-cycle-g1-s-phase-transition
go-epiboly	3.89499e-19	0.796415	1	0.944	3.71504e-15	4	go-epiboly
go-homotypic-cell-cell-adhesion	5.65622e-19	0.801806	1	0.97	5.3949e-15	4	go-homotypic-cell-cell-adhesion
go-enzyme-inhibitor-activity1	6.89839e-19	0.628381	1	0.992	6.57969e-15	4	go-enzyme-inhibitor-activity
go-embryonic-organ-development	7.30052e-19	0.255812	0.992	0.474	6.96323e-15	4	go-embryonic-organ-development
go-protein-localization-to-endosome	8.15457e-19	0.739902	1	0.965	7.77782e-15	4	go-protein-localization-to-endosome
go-establishment-or-maintenance-of-actin-cytoskeleton-polarity	3.21657e-18	0.81348	1	0.829	3.06797e-14	4	go-establishment-or-maintenance-of-actin-cytoskeleton-polarity
go-osteoblast-differentiation	4.23617e-18	0.562025	0.996	0.995	4.04046e-14	4	go-osteoblast-differentiation
go-protein-homooligomerization	5.65297e-18	0.665985	0.996	0.982	5.39181e-14	4	go-protein-homooligomerization
go-glycosylation1	5.75369e-18	0.400125	1	0.997	5.48787e-14	4	go-glycosylation
go-regulation-of-epithelial-cell-migration	7.55656e-18	0.774238	1	0.756	7.20745e-14	4	go-regulation-of-epithelial-cell-migration
go-extracellular-exosome-assembly	8.10416e-18	0.659851	0.988	0.746	7.72975e-14	4	go-extracellular-exosome-assembly
go-negative-regulation-of-perk-mediated-unfolded-protein-response	9.14496e-18	0.284286	0.79	0.416	8.72247e-14	4	go-negative-regulation-of-perk-mediated-unfolded-protein-response
go-cellular-response-to-uv	1.63454e-17	0.49702	1	0.987	1.55903e-13	4	go-cellular-response-to-uv
go-multicellular-organismal-homeostasis	2.24496e-17	0.919567	0.996	0.877	2.14124e-13	4	go-multicellular-organismal-homeostasis
go-positive-regulation-of-extrinsic-apoptotic-signaling-pathway	3.01855e-17	0.751991	1	0.911	2.87909e-13	4	go-positive-regulation-of-extrinsic-apoptotic-signaling-pathway
go-developmental-growth1	3.60994e-17	0.372588	1	0.998	3.44316e-13	4	go-developmental-growth
go-fibrillar-center	4.78176e-17	0.272389	1	0.999	4.56084e-13	4	go-fibrillar-center
go-regulation-of-smad-protein-signal-transduction	5.85583e-17	0.328951	0.971	0.532	5.58529e-13	4	go-regulation-of-smad-protein-signal-transduction
go-animal-organ-regeneration	6.75201e-17	0.692003	1	0.796	6.44007e-13	4	go-animal-organ-regeneration
go-positive-regulation-of-focal-adhesion-assembly	7.75119e-17	0.510422	1	0.995	7.39308e-13	4	go-positive-regulation-of-focal-adhesion-assembly
go-actin-filament-binding1	9.12447e-17	0.272683	1	1	8.70292e-13	4	go-actin-filament-binding
go-regulation-of-microvillus-organization	1.55895e-16	0.411652	0.959	0.515	1.48692e-12	4	go-regulation-of-microvillus-organization
go-regulation-of-membrane-permeability	1.64498e-16	0.311637	1	1	1.56898e-12	4	go-regulation-of-membrane-permeability
go-regulation-of-transmembrane-receptor-protein-serine-threonine-kinase-signaling-pathway	2.8243e-16	0.435543	0.996	0.582	2.69382e-12	4	go-regulation-of-transmembrane-receptor-protein-serine-threonine-kinase-signaling-pathway
go-cellular-modified-amino-acid-biosynthetic-process	4.05647e-16	0.614422	0.984	0.97	3.86906e-12	4	go-cellular-modified-amino-acid-biosynthetic-process
go-regulation-of-early-endosome-to-late-endosome-transport	4.9868e-16	0.477444	1	0.978	4.75641e-12	4	go-regulation-of-early-endosome-to-late-endosome-transport
go-regulation-of-hippo-signaling	6.24341e-16	0.261395	0.889	0.482	5.95497e-12	4	go-regulation-of-hippo-signaling
go-nsl-complex	8.09853e-16	0.262681	0.687	0.373	7.72438e-12	4	go-nsl-complex
go-fibroblast-growth-factor-receptor-signaling-pathway	8.20865e-16	0.5249	1	0.996	7.82941e-12	4	go-fibroblast-growth-factor-receptor-signaling-pathway
go-regulation-of-gtpase-activity	9.49837e-16	0.33155	1	0.996	9.05955e-12	4	go-regulation-of-gtpase-activity
go-cell-death-in-response-to-oxidative-stress	1.04923e-15	0.29877	1	1	1.00076e-11	4	go-cell-death-in-response-to-oxidative-stress
go-transcription-initiation-from-rna-polymerase-ii-promoter	1.27055e-15	0.264896	1	1	1.21186e-11	4	go-transcription-initiation-from-rna-polymerase-ii-promoter
go-nucleotide-binding-domain-leucine-rich-repeat-containing-receptor-signaling-pathway	1.553e-15	0.390932	1	1	1.48125e-11	4	go-nucleotide-binding-domain-leucine-rich-repeat-containing-receptor-signaling-pathway
go-immune-response-regulating-cell-surface-receptor-signaling-pathway	1.68647e-15	0.790383	1	0.955	1.60855e-11	4	go-immune-response-regulating-cell-surface-receptor-signaling-pathway
go-cofactor-metabolic-process	1.69895e-15	0.279155	1	0.999	1.62045e-11	4	go-cofactor-metabolic-process
go-membrane-raft-organization	2.07161e-15	0.785016	0.996	0.822	1.9759e-11	4	go-membrane-raft-organization
go-positive-regulation-of-neuron-migration	2.83737e-15	0.334212	0.959	0.56	2.70628e-11	4	go-positive-regulation-of-neuron-migration
go-coenzyme-binding	3.34156e-15	0.389826	0.996	0.994	3.18718e-11	4	go-coenzyme-binding
go-negative-regulation-of-map-kinase-activity	4.07047e-15	0.69762	0.992	0.951	3.88242e-11	4	go-negative-regulation-of-map-kinase-activity
go-negative-regulation-of-multi-organism-process	6.29699e-15	0.640317	0.996	0.735	6.00607e-11	4	go-negative-regulation-of-multi-organism-process
go-nad-binding	7.08868e-15	0.261282	1	1	6.76118e-11	4	go-nad-binding
go-platelet-derived-growth-factor-receptor-signaling-pathway	7.4187e-15	0.529157	1	0.981	7.07596e-11	4	go-platelet-derived-growth-factor-receptor-signaling-pathway
go-phosphatidylinositol-phosphate-binding	8.0713e-15	0.395534	1	0.996	7.69841e-11	4	go-phosphatidylinositol-phosphate-binding
go-transferase-activity-transferring-phosphorus-containing-groups	8.36647e-15	0.257591	1	1	7.97994e-11	4	go-transferase-activity-transferring-phosphorus-containing-groups
go-nuclear-transcription-factor-complex	9.06005e-15	0.272907	1	1	8.64148e-11	4	go-nuclear-transcription-factor-complex
go-microvillus-assembly	9.28037e-15	0.715085	1	0.769	8.85162e-11	4	go-microvillus-assembly
go-modulation-by-host-of-viral-process	9.35647e-15	0.73179	1	0.98	8.9242e-11	4	go-modulation-by-host-of-viral-process
go-primary-alcohol-metabolic-process	1.05045e-14	0.787522	1	0.753	1.00192e-10	4	go-primary-alcohol-metabolic-process
go-protein-insertion-into-membrane	1.28872e-14	0.498073	1	0.995	1.22918e-10	4	go-protein-insertion-into-membrane
go-cellular-response-to-osmotic-stress	1.46253e-14	0.724657	0.996	0.866	1.39497e-10	4	go-cellular-response-to-osmotic-stress
go-regulation-of-growth	1.52922e-14	0.269509	1	0.999	1.45857e-10	4	go-regulation-of-growth
go-steroid-biosynthetic-process	2.85871e-14	0.567999	0.996	0.99	2.72664e-10	4	go-steroid-biosynthetic-process
go-smad-protein-complex-assembly	5.91404e-14	0.666119	0.996	0.955	5.64081e-10	4	go-smad-protein-complex-assembly
go-cellular-response-to-amino-acid-stimulus	6.29241e-14	0.396076	1	0.993	6.0017e-10	4	go-cellular-response-to-amino-acid-stimulus
go-cardiac-muscle-cell-cardiac-muscle-cell-adhesion	1.46185e-13	0.612087	0.988	0.829	1.39431e-09	4	go-cardiac-muscle-cell-cardiac-muscle-cell-adhesion
go-peptidyl-serine-modification	1.52161e-13	0.302841	1	0.998	1.45131e-09	4	go-peptidyl-serine-modification
go-negative-regulation-of-protein-localization-to-cell-periphery	1.54718e-13	0.531497	1	0.989	1.4757e-09	4	go-negative-regulation-of-protein-localization-to-cell-periphery
go-myeloid-leukocyte-differentiation	1.70837e-13	0.641373	1	0.753	1.62944e-09	4	go-myeloid-leukocyte-differentiation
go-inactivation-of-mapk-activity	2.51854e-13	0.728106	0.996	0.92	2.40218e-09	4	go-inactivation-of-mapk-activity
go-epithelial-cell-morphogenesis	3.66459e-13	0.632405	1	0.683	3.49528e-09	4	go-epithelial-cell-morphogenesis
go-cell-division-site	4.42789e-13	0.581185	1	0.992	4.22332e-09	4	go-cell-division-site
go-polyketide-metabolic-process	4.45705e-13	0.63794	0.963	0.734	4.25114e-09	4	go-polyketide-metabolic-process
go-positive-regulation-of-viral-release-from-host-cell	5.35257e-13	0.336795	1	0.989	5.10528e-09	4	go-positive-regulation-of-viral-release-from-host-cell
go-regulation-of-interleukin-2-secretion	5.71584e-13	0.269437	0.947	0.552	5.45177e-09	4	go-regulation-of-interleukin-2-secretion
go-microvillus-organization	6.34857e-13	0.780932	0.992	0.838	6.05527e-09	4	go-microvillus-organization
go-regulation-of-response-to-biotic-stimulus	6.61204e-13	0.728057	1	0.892	6.30656e-09	4	go-regulation-of-response-to-biotic-stimulus
go-organic-hydroxy-compound-metabolic-process	1.21828e-12	0.667796	0.996	0.97	1.16199e-08	4	go-organic-hydroxy-compound-metabolic-process
go-rac-gtpase-binding	1.22956e-12	0.704675	0.992	0.933	1.17276e-08	4	go-rac-gtpase-binding
go-negative-regulation-of-hippo-signaling	2.16549e-12	0.346383	0.844	0.508	2.06544e-08	4	go-negative-regulation-of-hippo-signaling
go-platelet-degranulation1	2.1969e-12	0.401348	1	1	2.09541e-08	4	go-platelet-degranulation
go-response-to-leukemia-inhibitory-factor	2.76723e-12	0.262319	1	0.999	2.63938e-08	4	go-response-to-leukemia-inhibitory-factor
go-nf-kappab-binding	3.88152e-12	0.29426	1	0.998	3.70219e-08	4	go-nf-kappab-binding
go-positive-regulation-of-hemopoiesis	4.36751e-12	0.397957	0.996	0.593	4.16573e-08	4	go-positive-regulation-of-hemopoiesis
go-response-to-radiation	5.56114e-12	0.292113	1	0.999	5.30421e-08	4	go-response-to-radiation
go-response-to-arsenic-containing-substance	5.56982e-12	0.279467	1	0.997	5.3125e-08	4	go-response-to-arsenic-containing-substance
go-placenta-blood-vessel-development	8.0039e-12	0.585566	1	0.966	7.63412e-08	4	go-placenta-blood-vessel-development
go-positive-regulation-of-plasma-membrane-bounded-cell-projection-assembly	1.00532e-11	0.404997	1	0.999	9.58873e-08	4	go-positive-regulation-of-plasma-membrane-bounded-cell-projection-assembly
go-post-embryonic-development	1.18908e-11	0.444096	1	0.995	1.13414e-07	4	go-post-embryonic-development
go-peptidase-activator-activity	1.44261e-11	0.636675	1	0.954	1.37596e-07	4	go-peptidase-activator-activity
go-negative-regulation-of-oxidative-stress-induced-intrinsic-apoptotic-signaling-pathway	1.70624e-11	0.356834	0.996	0.992	1.62741e-07	4	go-negative-regulation-of-oxidative-stress-induced-intrinsic-apoptotic-signaling-pathway
go-protein-processing	2.45477e-11	0.425424	1	0.997	2.34136e-07	4	go-protein-processing
go-positive-regulation-of-pri-mirna-transcription-by-rna-polymerase-ii	2.90102e-11	0.755134	1	0.881	2.767e-07	4	go-positive-regulation-of-pri-mirna-transcription-by-rna-polymerase-ii
go-3-utr-mediated-mrna-destabilization	4.53808e-11	0.545505	1	0.977	4.32842e-07	4	go-3-utr-mediated-mrna-destabilization
go-dna-damage-response-signal-transduction-by-p53-class-mediator	4.82559e-11	0.284621	1	0.999	4.60265e-07	4	go-dna-damage-response-signal-transduction-by-p53-class-mediator
go-erbb2-signaling-pathway	5.53445e-11	0.541431	1	0.687	5.27875e-07	4	go-erbb2-signaling-pathway
go-regulation-of-protein-autophosphorylation	5.69781e-11	0.341138	1	0.999	5.43457e-07	4	go-regulation-of-protein-autophosphorylation
go-regulation-of-tumor-necrosis-factor-mediated-signaling-pathway	6.56496e-11	0.496211	0.996	0.712	6.26166e-07	4	go-regulation-of-tumor-necrosis-factor-mediated-signaling-pathway
go-rna-stem-loop-binding	7.21895e-11	0.348944	1	0.996	6.88543e-07	4	go-rna-stem-loop-binding
go-positive-regulation-of-membrane-permeability	7.72704e-11	0.300143	1	0.999	7.37005e-07	4	go-positive-regulation-of-membrane-permeability
go-trachea-formation	8.27496e-11	0.372581	0.885	0.55	7.89266e-07	4	go-trachea-formation
go-regulation-of-cytoplasmic-transport	8.96009e-11	0.514227	1	0.977	8.54613e-07	4	go-regulation-of-cytoplasmic-transport
go-regulation-of-body-fluid-levels	9.10184e-11	0.621006	1	0.703	8.68134e-07	4	go-regulation-of-body-fluid-levels
go-protein-tyrosine-kinase-binding	9.95573e-11	0.257313	0.996	0.94	9.49578e-07	4	go-protein-tyrosine-kinase-binding
go-actin-filament-bundle1	1.17931e-10	0.352074	1	0.998	1.12482e-06	4	go-actin-filament-bundle
go-positive-regulation-of-gtpase-activity	1.2232e-10	0.349295	1	0.987	1.16669e-06	4	go-positive-regulation-of-gtpase-activity
go-positive-regulation-of-protein-localization-to-cell-periphery	1.57537e-10	0.544596	1	0.99	1.50259e-06	4	go-positive-regulation-of-protein-localization-to-cell-periphery
go-alcohol-metabolic-process	1.69866e-10	0.741835	0.996	0.967	1.62018e-06	4	go-alcohol-metabolic-process
go-beta-catenin-binding	1.98244e-10	0.407096	1	0.987	1.89085e-06	4	go-beta-catenin-binding
go-dicarboxylic-acid-metabolic-process	2.35169e-10	0.573323	1	0.973	2.24304e-06	4	go-dicarboxylic-acid-metabolic-process
go-lipid-oxidation1	2.52151e-10	0.318799	0.996	0.99	2.40501e-06	4	go-lipid-oxidation
go-glyceraldehyde-3-phosphate-dehydrogenase-nadplus--non-phosphorylating-activity	2.73583e-10	0.361831	0.926	0.644	2.60943e-06	4	go-glyceraldehyde-3-phosphate-dehydrogenase-nadplus--non-phosphorylating-activity
go-fatty-acid-catabolic-process1	5.68948e-10	0.308454	1	0.986	5.42663e-06	4	go-fatty-acid-catabolic-process
go-protein-destabilization1	5.97739e-10	0.329883	0.996	0.989	5.70124e-06	4	go-protein-destabilization
go-production-of-small-rna-involved-in-gene-silencing-by-rna	6.11806e-10	0.404829	1	0.995	5.83541e-06	4	go-production-of-small-rna-involved-in-gene-silencing-by-rna
go-oxidoreductase-activity-acting-on-the-aldehyde-or-oxo-group-of-donors	6.99727e-10	0.390703	1	0.996	6.674e-06	4	go-oxidoreductase-activity-acting-on-the-aldehyde-or-oxo-group-of-donors
go-regulation-of-mitochondrial-outer-membrane-permeabilization-involved-in-apoptotic-signaling-pathway	8.44171e-10	0.388874	1	0.998	8.05171e-06	4	go-regulation-of-mitochondrial-outer-membrane-permeabilization-involved-in-apoptotic-signaling-pathway
go-membrane-lipid-metabolic-process1	8.55445e-10	0.294734	1	0.993	8.15923e-06	4	go-membrane-lipid-metabolic-process
go-actin-filament	1.03539e-09	0.375113	1	0.999	9.87557e-06	4	go-actin-filament
go-response-to-activity	1.2967e-09	0.67519	0.988	0.882	1.23679e-05	4	go-response-to-activity
go-regulation-of-rho-protein-signal-transduction	1.57177e-09	0.470917	0.971	0.662	1.49916e-05	4	go-regulation-of-rho-protein-signal-transduction
go-positive-regulation-of-stress-fiber-assembly	1.60897e-09	0.674426	0.996	0.955	1.53464e-05	4	go-positive-regulation-of-stress-fiber-assembly
go-protein-phosphatase-1-binding	1.77238e-09	0.291261	0.996	0.95	1.69049e-05	4	go-protein-phosphatase-1-binding
go-choline-transport	2.80516e-09	0.296921	0.955	0.57	2.67556e-05	4	go-choline-transport
go-cleavage-furrow	3.71941e-09	0.454283	1	0.998	3.54757e-05	4	go-cleavage-furrow
go-branching-involved-in-labyrinthine-layer-morphogenesis	3.75153e-09	0.459893	0.967	0.618	3.57821e-05	4	go-branching-involved-in-labyrinthine-layer-morphogenesis
go-response-to-interferon-alpha	5.68389e-09	0.462082	1	0.67	5.42129e-05	4	go-response-to-interferon-alpha
go-positive-regulation-of-nik-nf-kappab-signaling	6.91103e-09	0.719983	1	0.96	6.59174e-05	4	go-positive-regulation-of-nik-nf-kappab-signaling
go-negative-regulation-of-actin-filament-depolymerization	7.14352e-09	0.317259	1	0.961	6.81349e-05	4	go-negative-regulation-of-actin-filament-depolymerization
go-cell-adhesive-protein-binding-involved-in-bundle-of-his-cell-purkinje-myocyte-communication	7.18188e-09	0.399241	0.979	0.781	6.85008e-05	4	go-cell-adhesive-protein-binding-involved-in-bundle-of-his-cell-purkinje-myocyte-communication
go-peptidyl-threonine-dephosphorylation	7.23034e-09	0.575585	0.988	0.966	6.8963e-05	4	go-peptidyl-threonine-dephosphorylation
go-quinone-metabolic-process	8.16004e-09	0.651674	0.971	0.847	7.78305e-05	4	go-quinone-metabolic-process
go-entry-of-bacterium-into-host-cell	8.25287e-09	0.622454	1	0.944	7.87159e-05	4	go-entry-of-bacterium-into-host-cell
go-positive-regulation-of-posttranscriptional-gene-silencing	8.86713e-09	0.60517	1	0.987	8.45747e-05	4	go-positive-regulation-of-posttranscriptional-gene-silencing
go-positive-regulation-of-translation-in-response-to-stress	1.0581e-08	0.334077	0.934	0.642	0.000100921	4	go-positive-regulation-of-translation-in-response-to-stress
go-chromo-shadow-domain-binding	1.28421e-08	0.466139	0.988	0.865	0.000122488	4	go-chromo-shadow-domain-binding
go-actin-filament-based-transport1	1.52702e-08	0.350212	0.996	0.908	0.000145647	4	go-actin-filament-based-transport
go-response-to-testosterone	1.63798e-08	0.545035	0.996	0.967	0.000156231	4	go-response-to-testosterone
go-mitotic-cell-cycle-checkpoint	1.66105e-08	0.285722	1	0.998	0.000158431	4	go-mitotic-cell-cycle-checkpoint
go-signal-transduction-in-response-to-dna-damage	1.9324e-08	0.250024	1	0.999	0.000184313	4	go-signal-transduction-in-response-to-dna-damage
go-platelet-alpha-granule	2.22343e-08	0.279039	0.992	0.92	0.000212071	4	go-platelet-alpha-granule
go-regulation-of-oxidative-stress-induced-cell-death	2.25092e-08	0.281341	1	0.999	0.000214692	4	go-regulation-of-oxidative-stress-induced-cell-death
go-platelet-alpha-granule-lumen	2.52613e-08	0.254415	0.996	0.864	0.000240942	4	go-platelet-alpha-granule-lumen
go-organic-acid-biosynthetic-process	2.97671e-08	0.643496	0.996	0.924	0.000283919	4	go-organic-acid-biosynthetic-process
go-integrin-mediated-signaling-pathway	3.43622e-08	0.528018	1	0.681	0.000327746	4	go-integrin-mediated-signaling-pathway
go-proximal-promoter-sequence-specific-dna-binding	3.92624e-08	0.395383	1	0.994	0.000374485	4	go-proximal-promoter-sequence-specific-dna-binding
go-poly-a-binding	4.6308e-08	0.261071	1	0.998	0.000441686	4	go-poly-a-binding
go-fatty-acid-beta-oxidation1	4.98222e-08	0.279777	0.996	0.99	0.000475204	4	go-fatty-acid-beta-oxidation
go-protein-kinase-a-regulatory-subunit-binding	5.41322e-08	0.355289	1	0.994	0.000516313	4	go-protein-kinase-a-regulatory-subunit-binding
go-response-to-purine-containing-compound1	5.49103e-08	0.26808	1	0.982	0.000523734	4	go-response-to-purine-containing-compound
go-nadp-binding	6.104e-08	0.577294	0.984	0.941	0.0005822	4	go-nadp-binding
go-response-to-estrogen	6.20926e-08	0.283074	0.988	0.594	0.000592239	4	go-response-to-estrogen
go-antigen-processing-and-presentation-of-endogenous-peptide-antigen	6.79828e-08	0.45763	1	0.994	0.00064842	4	go-antigen-processing-and-presentation-of-endogenous-peptide-antigen
go-receptor-tyrosine-kinase-binding	6.87676e-08	0.251198	0.996	0.962	0.000655905	4	go-receptor-tyrosine-kinase-binding
go-regeneration	7.2032e-08	0.32504	0.992	0.612	0.000687041	4	go-regeneration
go-oligodendrocyte-differentiation	8.77944e-08	0.294468	0.996	0.963	0.000837383	4	go-oligodendrocyte-differentiation
go-phosphatase-activator-activity	8.86005e-08	0.338841	1	0.997	0.000845071	4	go-phosphatase-activator-activity
go-reactive-oxygen-species-biosynthetic-process	1.04816e-07	0.310892	0.996	0.903	0.000999738	4	go-reactive-oxygen-species-biosynthetic-process
go-co-smad-binding	1.09589e-07	0.282552	0.988	0.921	0.00104526	4	go-co-smad-binding
go-mrna-3-utr-au-rich-region-binding	1.09948e-07	0.612887	1	0.944	0.00104868	4	go-mrna-3-utr-au-rich-region-binding
go-establishment-of-sertoli-cell-barrier	1.19667e-07	0.313806	0.84	0.543	0.00114138	4	go-establishment-of-sertoli-cell-barrier
go-invadopodium	1.20096e-07	0.271609	0.996	0.907	0.00114547	4	go-invadopodium
go-proteasome-core-complex-beta-subunit-complex	1.47239e-07	0.39271	0.992	0.978	0.00140437	4	go-proteasome-core-complex-beta-subunit-complex
go-modulation-of-molecular-function-in-other-organism	1.63432e-07	0.649092	0.988	0.804	0.00155882	4	go-modulation-of-molecular-function-in-other-organism
go-regulation-of-release-of-cytochrome-c-from-mitochondria	1.68111e-07	0.534673	0.988	0.962	0.00160344	4	go-regulation-of-release-of-cytochrome-c-from-mitochondria
go-response-to-corticosteroid	1.98305e-07	0.664544	1	0.741	0.00189144	4	go-response-to-corticosteroid
go-regulation-of-cell-cycle-g1-s-phase-transition	2.01689e-07	0.386291	1	0.99	0.00192371	4	go-regulation-of-cell-cycle-g1-s-phase-transition
go-regulation-of-peptidyl-serine-phosphorylation	2.43567e-07	0.30031	0.988	0.941	0.00232314	4	go-regulation-of-peptidyl-serine-phosphorylation
go-cellular-response-to-ketone	2.51943e-07	0.532148	0.996	0.984	0.00240303	4	go-cellular-response-to-ketone
go-negative-regulation-of-anoikis	2.75981e-07	0.505039	0.975	0.704	0.00263231	4	go-negative-regulation-of-anoikis
go-response-to-cadmium-ion	2.76905e-07	0.514584	1	0.97	0.00264112	4	go-response-to-cadmium-ion
go-multi-multicellular-organism-process	2.87127e-07	0.302271	1	0.943	0.00273862	4	go-multi-multicellular-organism-process
go-primary-mirna-binding	3.05691e-07	0.478081	0.963	0.73	0.00291568	4	go-primary-mirna-binding
go-ubiquitin-independent-protein-catabolic-process-via-the-multivesicular-body-sorting-pathway	3.27085e-07	0.331788	0.922	0.728	0.00311974	4	go-ubiquitin-independent-protein-catabolic-process-via-the-multivesicular-body-sorting-pathway
go-lysosomal-lumen1	3.2973e-07	0.312316	1	0.994	0.00314497	4	go-lysosomal-lumen
go-interleukin-2-secretion	3.42663e-07	0.272608	0.992	0.64	0.00326832	4	go-interleukin-2-secretion
go-retinoic-acid-receptor-binding	4.25432e-07	0.44871	0.992	0.98	0.00405777	4	go-retinoic-acid-receptor-binding
go-negative-regulation-of-protein-localization-to-membrane	4.96501e-07	0.471713	1	0.992	0.00473563	4	go-negative-regulation-of-protein-localization-to-membrane
go-protein-localization-to-cell-junction	6.74621e-07	0.668189	0.992	0.919	0.00643453	4	go-protein-localization-to-cell-junction
go-rna-polymerase-ii-distal-enhancer-sequence-specific-dna-binding	7.54779e-07	0.308459	1	0.998	0.00719908	4	go-rna-polymerase-ii-distal-enhancer-sequence-specific-dna-binding
go-cellular-lipid-catabolic-process1	8.33352e-07	0.267517	1	0.995	0.00794851	4	go-cellular-lipid-catabolic-process
go-activation-of-mapkk-activity	9.17708e-07	0.549363	0.996	0.95	0.0087531	4	go-activation-of-mapkk-activity
go-protein-insertion-into-mitochondrial-membrane	1.56026e-06	0.287132	0.996	0.998	0.0148818	4	go-protein-insertion-into-mitochondrial-membrane
go-membrane-raft-assembly	1.60761e-06	0.54665	0.996	0.72	0.0153334	4	go-membrane-raft-assembly
go-cytoplasmic-sequestering-of-protein	1.60947e-06	0.297385	1	0.996	0.0153511	4	go-cytoplasmic-sequestering-of-protein
go-primary-mirna-processing	1.81784e-06	0.515052	0.984	0.864	0.0173385	4	go-primary-mirna-processing
go-negative-regulation-of-transcription-from-rna-polymerase-ii-promoter-in-response-to-stress	1.83673e-06	0.277585	1	0.987	0.0175187	4	go-negative-regulation-of-transcription-from-rna-polymerase-ii-promoter-in-response-to-stress
go-regulation-of-steroid-biosynthetic-process	1.86944e-06	0.32416	1	0.994	0.0178307	4	go-regulation-of-steroid-biosynthetic-process
go-protein-phosphatase-2a-binding	2.10854e-06	0.274863	0.996	0.99	0.0201113	4	go-protein-phosphatase-2a-binding
go-fibroblast-growth-factor-binding	2.14747e-06	0.348529	0.992	0.966	0.0204826	4	go-fibroblast-growth-factor-binding
go-sertoli-cell-development	2.53769e-06	0.750566	0.988	0.937	0.0242045	4	go-sertoli-cell-development
go-negative-regulation-of-autophagy	2.54447e-06	0.297257	1	0.997	0.0242692	4	go-negative-regulation-of-autophagy
go-coagulation	2.56625e-06	0.595565	1	0.835	0.0244769	4	go-coagulation
go-negative-regulation-of-mitochondrion-organization	2.60045e-06	0.263245	1	0.997	0.0248031	4	go-negative-regulation-of-mitochondrion-organization
go-epithelial-cell-apoptotic-process	3.49257e-06	0.458872	0.992	0.71	0.0333122	4	go-epithelial-cell-apoptotic-process
go-nuclear-receptor-transcription-coactivator-activity	3.55367e-06	0.3169	0.996	0.992	0.0338949	4	go-nuclear-receptor-transcription-coactivator-activity
go-regulation-of-reactive-oxygen-species-biosynthetic-process	4.2788e-06	0.299497	0.992	0.853	0.0408112	4	go-regulation-of-reactive-oxygen-species-biosynthetic-process
go-plasma-membrane-organization	4.6116e-06	0.408335	0.996	0.997	0.0439854	4	go-plasma-membrane-organization
go-blastocyst-formation	4.75328e-06	0.269079	0.979	0.914	0.0453368	4	go-blastocyst-formation
go-monocarboxylic-acid-catabolic-process1	4.87812e-06	0.278831	1	0.982	0.0465275	4	go-monocarboxylic-acid-catabolic-process
go-telencephalon-development	5.48923e-06	0.255221	0.992	0.963	0.0523563	4	go-telencephalon-development
go-regulation-of-viral-induced-cytoplasmic-pattern-recognition-receptor-signaling-pathway	7.20039e-06	0.274972	0.984	0.89	0.0686773	4	go-regulation-of-viral-induced-cytoplasmic-pattern-recognition-receptor-signaling-pathway
go-thymus-development	7.41293e-06	0.291915	0.988	0.891	0.0707045	4	go-thymus-development
go-positive-regulation-of-cytokine-production	8.53751e-06	0.458581	1	0.678	0.0814308	4	go-positive-regulation-of-cytokine-production
go-positive-regulation-of-mitotic-cell-cycle	8.902e-06	0.261359	1	0.999	0.0849073	4	go-positive-regulation-of-mitotic-cell-cycle
go-regulation-of-intrinsic-apoptotic-signaling-pathway-by-p53-class-mediator	8.999e-06	0.278914	1	1	0.0858325	4	go-regulation-of-intrinsic-apoptotic-signaling-pathway-by-p53-class-mediator
go-flemming-body	1.05096e-05	0.386664	1	0.976	0.100241	4	go-flemming-body
go-clathrin-coated-vesicle-membrane	1.06571e-05	0.461474	1	0.996	0.101647	4	go-clathrin-coated-vesicle-membrane
go-non-membrane-spanning-protein-tyrosine-phosphatase-activity	1.14556e-05	0.388748	0.971	0.89	0.109264	4	go-non-membrane-spanning-protein-tyrosine-phosphatase-activity
go-r-smad-binding	1.17017e-05	0.340541	1	0.998	0.111611	4	go-r-smad-binding
go-gas-homeostasis	1.19238e-05	0.567759	0.963	0.788	0.113729	4	go-gas-homeostasis
go-regulation-of-bicellular-tight-junction-assembly	1.25175e-05	0.602004	0.996	0.835	0.119392	4	go-regulation-of-bicellular-tight-junction-assembly
go-guanyl-nucleotide-exchange-factor-activity1	1.68149e-05	0.273939	0.992	0.986	0.16038	4	go-guanyl-nucleotide-exchange-factor-activity
go-cluster-of-actin-based-cell-projections	1.68182e-05	0.810736	0.992	0.896	0.160412	4	go-cluster-of-actin-based-cell-projections
go-manganese-ion-binding	1.70761e-05	0.349709	1	0.972	0.162871	4	go-manganese-ion-binding
go-cellular-response-to-testosterone-stimulus	1.88214e-05	0.504956	0.963	0.78	0.179519	4	go-cellular-response-to-testosterone-stimulus
go-modulation-by-host-of-symbiont-molecular-function	2.02509e-05	0.562978	0.984	0.765	0.193153	4	go-modulation-by-host-of-symbiont-molecular-function
go-kinase-activator-activity	2.13195e-05	0.461298	1	0.992	0.203346	4	go-kinase-activator-activity
go-rho-guanyl-nucleotide-exchange-factor-activity	2.15276e-05	0.352143	0.938	0.643	0.20533	4	go-rho-guanyl-nucleotide-exchange-factor-activity
go-anoikis	2.41999e-05	0.482143	0.942	0.74	0.230819	4	go-anoikis
go-lipid-binding	2.43389e-05	0.302757	1	0.996	0.232145	4	go-lipid-binding
go-transferase-activity-transferring-hexosyl-groups	2.54469e-05	0.271343	0.93	0.624	0.242712	4	go-transferase-activity-transferring-hexosyl-groups
go-cell-cell-adhesion-mediator-activity2	2.69186e-05	0.260744	1	0.994	0.25675	4	go-cell-cell-adhesion-mediator-activity
go-negative-regulation-of-stress-activated-protein-kinase-signaling-cascade	2.99317e-05	0.29353	1	0.996	0.285489	4	go-negative-regulation-of-stress-activated-protein-kinase-signaling-cascade
go-labyrinthine-layer-blood-vessel-development	3.59103e-05	0.274005	0.984	0.942	0.342513	4	go-labyrinthine-layer-blood-vessel-development
go-positive-regulation-of-intrinsic-apoptotic-signaling-pathway1	3.68212e-05	0.269998	1	1	0.351201	4	go-positive-regulation-of-intrinsic-apoptotic-signaling-pathway
go-transcytosis	4.10129e-05	0.270849	1	0.999	0.391181	4	go-transcytosis
go-male-sex-differentiation	4.17968e-05	0.314095	0.992	0.89	0.398658	4	go-male-sex-differentiation
go-phosphatidylinositol-3-4-5-trisphosphate-binding	4.46169e-05	0.291674	0.996	0.87	0.425556	4	go-phosphatidylinositol-3-4-5-trisphosphate-binding
go-peptidase-activity	4.60525e-05	0.265528	0.988	0.649	0.439249	4	go-peptidase-activity
go-cell-cell-contact-zone	5.11384e-05	0.327599	1	0.962	0.487758	4	go-cell-cell-contact-zone
go-au-rich-element-binding	5.40707e-05	0.303934	1	0.99	0.515727	4	go-au-rich-element-binding
go-actin-filament-depolymerization	5.53123e-05	0.460588	1	0.994	0.527568	4	go-actin-filament-depolymerization
go-regulation-of-mitochondrial-membrane-permeability-involved-in-apoptotic-process	6.13265e-05	0.301159	1	0.998	0.584932	4	go-regulation-of-mitochondrial-membrane-permeability-involved-in-apoptotic-process
go-negative-regulation-of-cell-cycle-g1-s-phase-transition	6.68831e-05	0.408208	1	0.985	0.637931	4	go-negative-regulation-of-cell-cycle-g1-s-phase-transition
go-protein-adp-ribosylase-activity	8.43918e-05	0.251928	0.955	0.888	0.804929	4	go-protein-adp-ribosylase-activity
go-phosphotransferase-activity-for-other-substituted-phosphate-groups	8.74869e-05	0.38194	0.979	0.92	0.83445	4	go-phosphotransferase-activity-for-other-substituted-phosphate-groups
go-small-molecule-catabolic-process1	8.99294e-05	0.367697	0.979	0.967	0.857746	4	go-small-molecule-catabolic-process
go-response-to-platelet-derived-growth-factor	0.000112802	0.340578	0.979	0.908	1	4	go-response-to-platelet-derived-growth-factor
go-epidermal-growth-factor-receptor-binding	0.000113094	0.549855	0.984	0.804	1	4	go-epidermal-growth-factor-receptor-binding
go-positive-regulation-of-intracellular-steroid-hormone-receptor-signaling-pathway	0.000114146	0.261732	0.971	0.835	1	4	go-positive-regulation-of-intracellular-steroid-hormone-receptor-signaling-pathway
go-organic-hydroxy-compound-biosynthetic-process	0.000117629	0.304787	0.967	0.955	1	4	go-organic-hydroxy-compound-biosynthetic-process
go-cell-adhesion-mediator-activity2	0.000158435	0.251009	1	0.997	1	4	go-cell-adhesion-mediator-activity
go-regulation-of-pinocytosis	0.000159611	0.332677	0.963	0.876	1	4	go-regulation-of-pinocytosis
go-membrane-protein-intracellular-domain-proteolysis	0.00017645	0.402494	0.984	0.942	1	4	go-membrane-protein-intracellular-domain-proteolysis
go-specific-granule-membrane	0.000183493	0.597767	1	0.978	1	4	go-specific-granule-membrane
go-negative-regulation-of-viral-release-from-host-cell	0.000218949	0.436808	0.947	0.747	1	4	go-negative-regulation-of-viral-release-from-host-cell
go-positive-regulation-of-cytoplasmic-transport	0.000228212	0.551589	0.988	0.948	1	4	go-positive-regulation-of-cytoplasmic-transport
go-glucocorticoid-receptor-binding	0.000236892	0.440515	1	0.964	1	4	go-glucocorticoid-receptor-binding
go-regulation-of-myeloid-cell-differentiation	0.000286512	0.626478	0.996	0.926	1	4	go-regulation-of-myeloid-cell-differentiation
go-response-to-gamma-radiation	0.000318189	0.364542	0.996	0.988	1	4	go-response-to-gamma-radiation
go-organophosphate-ester-transport	0.000349866	0.314525	0.988	0.918	1	4	go-organophosphate-ester-transport
go-pigmentation	0.000417027	0.416626	1	0.99	1	4	go-pigmentation
go-establishment-or-maintenance-of-bipolar-cell-polarity	0.000423303	0.526629	1	0.967	1	4	go-establishment-or-maintenance-of-bipolar-cell-polarity
go-endoplasmic-reticulum-lumen	0.000440166	0.307118	0.992	0.981	1	4	go-endoplasmic-reticulum-lumen
go-transferase-activity-transferring-glycosyl-groups	0.000441893	0.271792	0.938	0.65	1	4	go-transferase-activity-transferring-glycosyl-groups
go-ras-guanyl-nucleotide-exchange-factor-activity	0.000519223	0.508455	0.984	0.894	1	4	go-ras-guanyl-nucleotide-exchange-factor-activity
go-regulation-of-protein-deubiquitination	0.000600848	0.450655	1	0.935	1	4	go-regulation-of-protein-deubiquitination
go-alpha-amino-acid-biosynthetic-process	0.000619023	0.283494	0.996	0.984	1	4	go-alpha-amino-acid-biosynthetic-process
go-negative-regulation-of-viral-genome-replication	0.000783254	0.421423	1	0.728	1	4	go-negative-regulation-of-viral-genome-replication
go-flotillin-complex	0.00082008	0.390757	0.996	0.93	1	4	go-flotillin-complex
go-regulation-of-perk-mediated-unfolded-protein-response	0.00084699	0.476439	0.984	0.924	1	4	go-regulation-of-perk-mediated-unfolded-protein-response
go-protein-localization-to-early-endosome	0.00100764	0.574588	0.992	0.892	1	4	go-protein-localization-to-early-endosome
go-negative-regulation-of-dna-binding	0.00107165	0.257603	0.996	0.964	1	4	go-negative-regulation-of-dna-binding
go-midbody-abscission	0.0011149	0.27607	1	0.981	1	4	go-midbody-abscission
go-positive-regulation-of-growth	0.00112104	0.30701	1	0.985	1	4	go-positive-regulation-of-growth
go-establishment-of-epithelial-cell-polarity	0.00130763	0.605765	1	0.919	1	4	go-establishment-of-epithelial-cell-polarity
go-positive-regulation-of-myeloid-leukocyte-mediated-immunity	0.00133366	0.318844	0.992	0.84	1	4	go-positive-regulation-of-myeloid-leukocyte-mediated-immunity
go-basement-membrane-organization	0.00158236	0.645189	0.996	0.911	1	4	go-basement-membrane-organization
go-activation-of-mapk-activity	0.00165709	0.376318	0.992	0.952	1	4	go-activation-of-mapk-activity
go-negative-regulation-of-actin-filament-polymerization1	0.0018457	0.259957	1	0.993	1	4	go-negative-regulation-of-actin-filament-polymerization
go-glycoside-metabolic-process	0.00206765	0.336397	0.942	0.67	1	4	go-glycoside-metabolic-process
go-nadph-binding	0.00209608	0.366419	0.996	0.944	1	4	go-nadph-binding
go-extrinsic-component-of-organelle-membrane	0.0022543	0.279936	0.979	0.937	1	4	go-extrinsic-component-of-organelle-membrane
go-cellular-protein-containing-complex-localization	0.00246495	0.496673	0.959	0.817	1	4	go-cellular-protein-containing-complex-localization
go-protein-kinase-c-binding	0.00285358	0.552921	1	0.988	1	4	go-protein-kinase-c-binding
go-intracellular-estrogen-receptor-signaling-pathway	0.00289005	0.25032	1	0.997	1	4	go-intracellular-estrogen-receptor-signaling-pathway
go-nuclear-transcribed-mrna-catabolic-process-deadenylation-independent-decay	0.00304538	0.316417	0.979	0.788	1	4	go-nuclear-transcribed-mrna-catabolic-process-deadenylation-independent-decay
go-liver-regeneration	0.00318028	0.353114	1	0.933	1	4	go-liver-regeneration
go-cysteine-type-endopeptidase-activity	0.00320068	0.351382	0.984	0.933	1	4	go-cysteine-type-endopeptidase-activity
go-glial-cell-development	0.00392458	0.375145	0.996	0.869	1	4	go-glial-cell-development
go-tissue-homeostasis	0.00492396	0.372472	0.984	0.652	1	4	go-tissue-homeostasis
go-regulation-of-intrinsic-apoptotic-signaling-pathway-in-response-to-dna-damage	0.00514583	0.317218	1	0.987	1	4	go-regulation-of-intrinsic-apoptotic-signaling-pathway-in-response-to-dna-damage
go-rap-protein-signal-transduction	0.00621023	0.294617	1	0.982	1	4	go-rap-protein-signal-transduction
go-developmental-process-involved-in-reproduction	0.00636383	0.443862	1	0.881	1	4	go-developmental-process-involved-in-reproduction
go-protein-heterooligomerization	0.00643923	0.635223	1	0.96	1	4	go-protein-heterooligomerization
go-b-cell-apoptotic-process	0.00742397	0.284083	0.984	0.866	1	4	go-b-cell-apoptotic-process
go-signaling-adaptor-activity	0.007472	0.463785	0.996	0.849	1	4	go-signaling-adaptor-activity
go-protein-localization-to-phagophore-assembly-site	0.00796674	0.307343	0.979	0.93	1	4	go-protein-localization-to-phagophore-assembly-site
go-mhc-protein-complex	0.00914814	0.361515	0.918	0.627	1	4	go-mhc-protein-complex
go-14-3-3-protein-binding	0.00920505	0.560003	0.996	0.885	1	4	go-14-3-3-protein-binding
go-regulation-of-microvillus-assembly	7.01217e-128	0.267472	0.862	0.147	6.68821e-124	5	go-regulation-of-microvillus-assembly
go-proteolysis1	6.53587e-99	0.463366	1	1	6.23391e-95	5	go-proteolysis
go-oxidoreductase-activity-acting-on-ch-oh-group-of-donors1	4.22906e-96	1.27111	1	0.964	4.03368e-92	5	go-oxidoreductase-activity-acting-on-ch-oh-group-of-donors
go-water-soluble-vitamin-metabolic-process	4.98772e-95	1.45448	1	0.874	4.75728e-91	5	go-water-soluble-vitamin-metabolic-process
go-cofactor-metabolic-process1	5.832e-95	0.807636	1	0.999	5.56256e-91	5	go-cofactor-metabolic-process
go-cofactor-binding1	2.78498e-94	1.06191	1	0.994	2.65631e-90	5	go-cofactor-binding
go-mhc-protein-complex-assembly	4.16392e-92	0.443094	0.679	0.122	3.97154e-88	5	go-mhc-protein-complex-assembly
go-organic-acid-metabolic-process1	3.38733e-91	0.720799	1	1	3.23084e-87	5	go-organic-acid-metabolic-process
go-vitamin-metabolic-process	1.29987e-85	1.42397	1	0.749	1.23982e-81	5	go-vitamin-metabolic-process
go-organonitrogen-compound-biosynthetic-process	1.1388e-82	0.319593	1	1	1.08619e-78	5	go-organonitrogen-compound-biosynthetic-process
go-glutathione-derivative-biosynthetic-process	1.60323e-82	1.15958	1	0.969	1.52916e-78	5	go-glutathione-derivative-biosynthetic-process
go-identical-protein-binding1	1.71438e-81	0.409951	1	1	1.63518e-77	5	go-identical-protein-binding
go-cellular-response-to-oxidative-stress1	2.11464e-81	0.552736	1	1	2.01694e-77	5	go-cellular-response-to-oxidative-stress
go-small-molecule-metabolic-process	1.23577e-80	0.545178	1	1	1.17868e-76	5	go-small-molecule-metabolic-process
go-oxidoreductase-activity	1.06724e-78	0.617169	1	0.999	1.01793e-74	5	go-oxidoreductase-activity
go-transferase-activity-transferring-alkyl-or-aryl-other-than-methyl-groups	3.79505e-78	0.985944	1	0.978	3.61972e-74	5	go-transferase-activity-transferring-alkyl-or-aryl-other-than-methyl-groups
go-coenzyme-binding1	5.66592e-77	0.862853	1	0.994	5.40415e-73	5	go-coenzyme-binding
go-positive-regulation-of-i-kappab-kinase-nf-kappab-signaling1	3.26128e-76	1.07012	1	0.995	3.11061e-72	5	go-positive-regulation-of-i-kappab-kinase-nf-kappab-signaling
go-apoptotic-signaling-pathway1	3.64697e-74	0.426146	1	1	3.47848e-70	5	go-apoptotic-signaling-pathway
go-oxidation-reduction-process	5.56859e-74	0.529189	1	1	5.31132e-70	5	go-oxidation-reduction-process
go-small-molecule-catabolic-process2	4.74699e-73	1.11622	1	0.964	4.52768e-69	5	go-small-molecule-catabolic-process
go-polyketide-metabolic-process1	3.91795e-72	1.19651	1	0.733	3.73694e-68	5	go-polyketide-metabolic-process
go-tertiary-granule-lumen1	4.27246e-71	1.02163	1	0.993	4.07507e-67	5	go-tertiary-granule-lumen
go-positive-regulation-of-proteolysis1	4.41743e-71	0.490342	1	1	4.21335e-67	5	go-positive-regulation-of-proteolysis
go-i-kappab-kinase-nf-kappab-signaling1	1.09612e-70	0.77976	1	1	1.04548e-66	5	go-i-kappab-kinase-nf-kappab-signaling
go-cellular-response-to-toxic-substance1	1.13785e-70	0.871355	1	0.995	1.08528e-66	5	go-cellular-response-to-toxic-substance
go-monocarboxylic-acid-metabolic-process1	2.84519e-69	1.09453	1	0.955	2.71375e-65	5	go-monocarboxylic-acid-metabolic-process
go-organic-acid-catabolic-process1	1.27524e-68	0.995989	1	0.972	1.21633e-64	5	go-organic-acid-catabolic-process
go-cellular-response-to-external-stimulus1	1.66468e-67	0.557488	1	1	1.58777e-63	5	go-cellular-response-to-external-stimulus
go-intrinsic-apoptotic-signaling-pathway-in-response-to-endoplasmic-reticulum-stress1	2.65333e-67	0.78429	1	0.997	2.53075e-63	5	go-intrinsic-apoptotic-signaling-pathway-in-response-to-endoplasmic-reticulum-stress
go-cellular-amino-acid-biosynthetic-process	5.14654e-66	1.15801	1	0.941	4.90877e-62	5	go-cellular-amino-acid-biosynthetic-process
go-cellular-response-to-reactive-oxygen-species1	5.37621e-66	0.720224	1	0.998	5.12783e-62	5	go-cellular-response-to-reactive-oxygen-species
go-response-to-oxidative-stress1	2.04178e-65	0.44309	1	1	1.94745e-61	5	go-response-to-oxidative-stress
go-response-to-cytokine1	2.05405e-65	0.619173	1	1	1.95915e-61	5	go-response-to-cytokine
go-glutathione-metabolic-process	2.81679e-63	1.18213	1	0.894	2.68666e-59	5	go-glutathione-metabolic-process
go-response-to-epidermal-growth-factor1	3.04538e-63	0.765424	1	0.995	2.90468e-59	5	go-response-to-epidermal-growth-factor
go-apical-junction-complex1	9.58878e-63	1.13348	1	0.922	9.14578e-59	5	go-apical-junction-complex
go-alpha-amino-acid-biosynthetic-process1	1.63385e-62	0.901671	1	0.984	1.55837e-58	5	go-alpha-amino-acid-biosynthetic-process
go-maintenance-of-protein-location-in-mitochondrion	2.56809e-62	0.347163	0.752	0.228	2.44944e-58	5	go-maintenance-of-protein-location-in-mitochondrion
go-oxidoreductase-activity-acting-on-the-ch-ch-group-of-donors1	2.60448e-62	1.0926	1	0.888	2.48415e-58	5	go-oxidoreductase-activity-acting-on-the-ch-ch-group-of-donors
go-glycoprotein-biosynthetic-process1	4.0894e-62	0.839592	1	0.991	3.90047e-58	5	go-glycoprotein-biosynthetic-process
go-response-to-tumor-necrosis-factor1	5.56965e-62	0.870529	1	0.991	5.31233e-58	5	go-response-to-tumor-necrosis-factor
go-glycosylation2	5.57003e-62	0.708026	1	0.997	5.31269e-58	5	go-glycosylation
go-regulation-of-response-to-stress1	3.66834e-61	0.404095	1	1	3.49886e-57	5	go-regulation-of-response-to-stress
go-regulation-of-innate-immune-response1	1.39162e-60	0.471091	1	1	1.32732e-56	5	go-regulation-of-innate-immune-response
go-regulation-of-cysteine-type-endopeptidase-activity1	1.55544e-60	0.783855	1	0.999	1.48358e-56	5	go-regulation-of-cysteine-type-endopeptidase-activity
go-cytokine-mediated-signaling-pathway1	1.87347e-60	0.844025	1	0.998	1.78692e-56	5	go-cytokine-mediated-signaling-pathway
go-carbohydrate-derivative-metabolic-process1	4.51892e-60	0.511354	1	0.999	4.31014e-56	5	go-carbohydrate-derivative-metabolic-process
go-interaction-with-host1	7.8758e-60	0.543724	1	1	7.51194e-56	5	go-interaction-with-host
go-cadherin-binding-involved-in-cell-cell-adhesion1	7.82172e-59	0.920175	1	0.992	7.46036e-55	5	go-cadherin-binding-involved-in-cell-cell-adhesion
go-cellular-modified-amino-acid-biosynthetic-process1	9.69245e-59	0.959764	1	0.969	9.24466e-55	5	go-cellular-modified-amino-acid-biosynthetic-process
go-hepaticobiliary-system-development1	6.75557e-58	0.685795	1	0.998	6.44346e-54	5	go-hepaticobiliary-system-development
go-protein-complex-oligomerization1	1.16521e-57	0.582201	1	1	1.11138e-53	5	go-protein-complex-oligomerization
go-cellular-lipid-metabolic-process2	9.89722e-57	0.631505	1	0.997	9.43997e-53	5	go-cellular-lipid-metabolic-process
go-l-serine-biosynthetic-process	1.2273e-56	0.661172	0.977	0.42	1.1706e-52	5	go-l-serine-biosynthetic-process
go-tight-junction1	2.08594e-56	1.11927	1	0.866	1.98957e-52	5	go-tight-junction
go-entry-into-other-organism-involved-in-symbiotic-interaction1	2.12742e-56	0.921161	1	0.992	2.02913e-52	5	go-entry-into-other-organism-involved-in-symbiotic-interaction
go-regulation-of-proteolysis1	5.09674e-56	0.397467	1	1	4.86127e-52	5	go-regulation-of-proteolysis
go-activation-of-innate-immune-response1	5.23001e-56	0.404168	1	1	4.98838e-52	5	go-activation-of-innate-immune-response
go-pattern-recognition-receptor-signaling-pathway1	5.23951e-56	0.944825	1	0.993	4.99744e-52	5	go-pattern-recognition-receptor-signaling-pathway
go-regulation-of-defense-response1	1.23758e-55	0.893134	1	0.996	1.18041e-51	5	go-regulation-of-defense-response
go-copper-ion-import	1.983e-55	0.290634	0.743	0.217	1.89139e-51	5	go-copper-ion-import
go-peptidase-activity1	2.76212e-55	1.1024	1	0.652	2.63451e-51	5	go-peptidase-activity
go-serine-family-amino-acid-biosynthetic-process	4.72524e-55	0.292551	0.991	0.357	4.50693e-51	5	go-serine-family-amino-acid-biosynthetic-process
go-cell-cell-junction1	4.86404e-55	0.759884	1	0.998	4.63932e-51	5	go-cell-cell-junction
go-nad-binding1	2.27525e-54	0.505181	1	1	2.17014e-50	5	go-nad-binding
go-sulfur-compound-biosynthetic-process	2.45097e-54	0.675285	1	0.992	2.33774e-50	5	go-sulfur-compound-biosynthetic-process
go-monocarboxylic-acid-catabolic-process2	5.97444e-54	0.7674	1	0.982	5.69842e-50	5	go-monocarboxylic-acid-catabolic-process
go-cellular-response-to-drug1	1.34699e-53	0.871862	1	0.995	1.28476e-49	5	go-cellular-response-to-drug
go-intrinsic-apoptotic-signaling-pathway	5.20461e-53	0.327788	1	1	4.96416e-49	5	go-intrinsic-apoptotic-signaling-pathway
go-defense-response1	5.72663e-53	0.41152	0.899	0.311	5.46206e-49	5	go-defense-response
go-regulation-of-stress-activated-protein-kinase-signaling-cascade1	1.21098e-52	0.83017	1	0.995	1.15503e-48	5	go-regulation-of-stress-activated-protein-kinase-signaling-cascade
go-fatty-acid-catabolic-process2	1.7025e-52	0.692007	1	0.986	1.62385e-48	5	go-fatty-acid-catabolic-process
go-nik-nf-kappab-signaling1	3.78071e-52	0.375384	1	1	3.60604e-48	5	go-nik-nf-kappab-signaling
go-regulation-of-apoptotic-signaling-pathway1	5.82061e-52	0.334652	1	1	5.5517e-48	5	go-regulation-of-apoptotic-signaling-pathway
go-apoptotic-process1	8.71929e-52	0.306184	1	1	8.31646e-48	5	go-apoptotic-process
go-response-to-interleukin-11	2.24056e-51	0.449489	1	1	2.13705e-47	5	go-response-to-interleukin-1
go-toll-like-receptor-signaling-pathway1	2.39133e-51	0.94372	1	0.988	2.28085e-47	5	go-toll-like-receptor-signaling-pathway
go-positive-regulation-of-defense-response1	2.53938e-51	0.635901	1	0.999	2.42206e-47	5	go-positive-regulation-of-defense-response
go-regulation-of-cell-death1	3.59279e-51	0.388895	1	1	3.4268e-47	5	go-regulation-of-cell-death
go-regulation-of-intracellular-signal-transduction1	3.99991e-51	0.438236	1	1	3.81511e-47	5	go-regulation-of-intracellular-signal-transduction
go-regulation-of-viral-life-cycle1	4.64488e-51	0.533154	1	1	4.43028e-47	5	go-regulation-of-viral-life-cycle
go-innate-immune-response1	1.22229e-50	1.03049	1	0.85	1.16582e-46	5	go-innate-immune-response
go-response-to-interferon-gamma1	4.54926e-50	0.983909	1	0.976	4.33908e-46	5	go-response-to-interferon-gamma
go-cellular-amino-acid-metabolic-process	1.09311e-49	0.397154	1	1	1.0426e-45	5	go-cellular-amino-acid-metabolic-process
go-apical-junction-assembly1	5.70886e-49	0.705123	1	0.995	5.44511e-45	5	go-apical-junction-assembly
go-regulation-of-symbiosis-encompassing-mutualism-through-parasitism1	9.56074e-49	0.378279	1	1	9.11903e-45	5	go-regulation-of-symbiosis-encompassing-mutualism-through-parasitism
go-lateral-plasma-membrane1	1.52434e-48	0.933743	1	0.96	1.45392e-44	5	go-lateral-plasma-membrane
go-response-to-virus1	3.60191e-48	0.845259	1	0.991	3.4355e-44	5	go-response-to-virus
go-regulation-of-map-kinase-activity1	9.15713e-48	0.762399	1	0.995	8.73407e-44	5	go-regulation-of-map-kinase-activity
go-response-to-extracellular-stimulus	3.34003e-47	0.364195	1	1	3.18572e-43	5	go-response-to-extracellular-stimulus
go-immune-effector-process1	3.40265e-47	0.49953	1	1	3.24544e-43	5	go-immune-effector-process
go-response-to-endoplasmic-reticulum-stress	5.80727e-47	0.265783	1	1	5.53897e-43	5	go-response-to-endoplasmic-reticulum-stress
go-extrinsic-apoptotic-signaling-pathway1	7.38762e-47	0.691459	1	0.997	7.04631e-43	5	go-extrinsic-apoptotic-signaling-pathway
go-lipid-metabolic-process1	1.44634e-46	0.415912	1	1	1.37952e-42	5	go-lipid-metabolic-process
go-stress-activated-protein-kinase-signaling-cascade1	2.08743e-46	0.40899	1	1	1.99099e-42	5	go-stress-activated-protein-kinase-signaling-cascade
go-vacuole	2.20228e-46	0.270099	1	1	2.10053e-42	5	go-vacuole
go-response-to-antineoplastic-agent1	4.55471e-46	0.567915	1	0.999	4.34428e-42	5	go-response-to-antineoplastic-agent
go-positive-regulation-of-peptidase-activity1	6.18887e-46	0.784752	1	0.994	5.90294e-42	5	go-positive-regulation-of-peptidase-activity
go-cellular-response-to-abiotic-stimulus1	1.99838e-45	0.72814	1	0.993	1.90606e-41	5	go-cellular-response-to-abiotic-stimulus
go-epithelium-development1	2.25662e-45	0.869544	1	0.95	2.15237e-41	5	go-epithelium-development
go-lipid-droplet1	4.89246e-45	0.628979	1	0.999	4.66643e-41	5	go-lipid-droplet
go-alpha-amino-acid-metabolic-process	1.11491e-44	1.00585	1	0.945	1.0634e-40	5	go-alpha-amino-acid-metabolic-process
go-cellular-response-to-hydrogen-peroxide1	1.28237e-44	0.933964	1	0.959	1.22312e-40	5	go-cellular-response-to-hydrogen-peroxide
go-organic-acid-biosynthetic-process1	5.98106e-44	1.00712	1	0.925	5.70474e-40	5	go-organic-acid-biosynthetic-process
go-mitochondrial-matrix1	1.21958e-43	0.482888	1	1	1.16323e-39	5	go-mitochondrial-matrix
go-positive-regulation-of-protein-metabolic-process1	2.88911e-43	0.31103	1	1	2.75563e-39	5	go-positive-regulation-of-protein-metabolic-process
go-regulation-of-multi-organism-process1	3.00809e-43	0.422354	1	1	2.86912e-39	5	go-regulation-of-multi-organism-process
go-negative-regulation-of-apoptotic-signaling-pathway1	4.01495e-43	0.365759	1	1	3.82946e-39	5	go-negative-regulation-of-apoptotic-signaling-pathway
go-cellular-response-to-lipid1	1.03502e-42	0.685533	1	0.997	9.87198e-39	5	go-cellular-response-to-lipid
go-positive-regulation-of-intracellular-signal-transduction1	1.45139e-42	0.670188	1	0.999	1.38433e-38	5	go-positive-regulation-of-intracellular-signal-transduction
go-gland-development1	1.89285e-42	0.744493	1	0.995	1.8054e-38	5	go-gland-development
go-endoplasmic-reticulum-part	2.13051e-42	0.259659	1	1	2.03208e-38	5	go-endoplasmic-reticulum-part
go-response-to-type-i-interferon1	2.371e-42	0.797937	1	0.99	2.26146e-38	5	go-response-to-type-i-interferon
go-sulfur-compound-metabolic-process	2.56831e-42	0.949033	1	0.921	2.44965e-38	5	go-sulfur-compound-metabolic-process
go-cellular-lipid-catabolic-process2	3.37882e-42	0.608701	1	0.995	3.22272e-38	5	go-cellular-lipid-catabolic-process
go-tetrapyrrole-metabolic-process	4.16145e-42	0.896747	1	0.643	3.96919e-38	5	go-tetrapyrrole-metabolic-process
go-carbohydrate-derivative-biosynthetic-process1	1.2868e-41	0.465157	1	0.998	1.22735e-37	5	go-carbohydrate-derivative-biosynthetic-process
go-transition-metal-ion-binding	1.85693e-41	0.439563	1	0.999	1.77114e-37	5	go-transition-metal-ion-binding
go-regulation-of-stem-cell-differentiation1	2.05114e-41	0.359092	1	1	1.95638e-37	5	go-regulation-of-stem-cell-differentiation
go-specific-granule1	2.30883e-41	0.723826	1	0.996	2.20216e-37	5	go-specific-granule
go-response-to-growth-factor1	5.62615e-41	0.519103	1	0.999	5.36622e-37	5	go-response-to-growth-factor
go-rna-phosphodiester-bond-hydrolysis	6.31684e-41	0.7163	1	0.983	6.025e-37	5	go-rna-phosphodiester-bond-hydrolysis
go-cellular-response-to-antibiotic1	7.22001e-41	0.592438	1	0.998	6.88645e-37	5	go-cellular-response-to-antibiotic
go-tight-junction-organization1	9.71741e-41	0.782336	1	0.98	9.26847e-37	5	go-tight-junction-organization
go-response-to-arsenic-containing-substance1	3.0989e-40	0.507172	1	0.997	2.95573e-36	5	go-response-to-arsenic-containing-substance
go-response-to-toxic-substance1	3.24688e-40	0.512143	1	0.998	3.09687e-36	5	go-response-to-toxic-substance
[truncated: 3,322 more rows]

## Sheet: table s3-3 pathway-based_FC-DEF
	p_val	avg_log2FC	pct.1	pct.2	p_val_adj	cluster	gene
reactome-regulation-of-expression-of-slits-and-robos	5.33725e-78	0.284969	1	1	7.48283e-75	0	reactome-regulation-of-expression-of-slits-and-robos
reactome-signaling-by-robo-receptors	7.01333e-71	0.267237	1	1	9.8327e-68	0	reactome-signaling-by-robo-receptors
reactome-developmental-biology	1.41334e-54	0.502635	1	0.998	1.9815e-51	0	reactome-developmental-biology
reactome-adp-signalling-through-p2y-purinoceptor-12	6.39127e-54	1.1605	0.976	0.914	8.96056e-51	0	reactome-adp-signalling-through-p2y-purinoceptor-12
reactome-synthesis-secretion-and-inactivation-of-glucose-dependent-insulinotropic-polypeptide-gip	1.63505e-52	0.897726	1	0.98	2.29234e-49	0	reactome-synthesis-secretion-and-inactivation-of-glucose-dependent-insulinotropic-polypeptide-gip
reactome-g-protein-activation	1.65998e-52	0.980338	0.967	0.802	2.3273e-49	0	reactome-g-protein-activation
reactome-glucagon-like-peptide-1-glp1-regulates-insulin-secretion	8.96462e-52	1.06307	0.997	0.967	1.25684e-48	0	reactome-glucagon-like-peptide-1-glp1-regulates-insulin-secretion
reactome-incretin-synthesis-secretion-and-inactivation	2.94796e-51	0.990443	1	0.975	4.13305e-48	0	reactome-incretin-synthesis-secretion-and-inactivation
reactome-axon-guidance	5.14137e-51	0.260634	1	1	7.2082e-48	0	reactome-axon-guidance
reactome-srp-dependent-cotranslational-protein-targeting-to-membrane	8.36269e-51	0.28096	1	1	1.17245e-47	0	reactome-srp-dependent-cotranslational-protein-targeting-to-membrane
reactome-peptide-hormone-metabolism	4.49289e-50	0.93539	0.994	0.856	6.29904e-47	0	reactome-peptide-hormone-metabolism
reactome-nonsense-mediated-decay-nmd-independent-of-the-exon-junction-complex-ejc	4.75512e-50	0.285846	1	1	6.66668e-47	0	reactome-nonsense-mediated-decay-nmd-independent-of-the-exon-junction-complex-ejc
reactome-glucagon-signaling-in-metabolic-regulation	3.4666e-49	0.885587	0.997	0.937	4.86017e-46	0	reactome-glucagon-signaling-in-metabolic-regulation
reactome-vasopressin-regulates-renal-water-homeostasis-via-aquaporins	5.60342e-48	0.891608	0.991	0.93	7.856e-45	0	reactome-vasopressin-regulates-renal-water-homeostasis-via-aquaporins
reactome-metabolism-of-amino-acids-and-derivatives	7.6882e-48	0.257955	1	1	1.07789e-44	0	reactome-metabolism-of-amino-acids-and-derivatives
reactome-inwardly-rectifying-kplus-channels	1.52787e-47	0.440966	0.937	0.587	2.14208e-44	0	reactome-inwardly-rectifying-kplus-channels
reactome-runx1-regulates-transcription-of-genes-involved-in-differentiation-of-hscs	6.9848e-47	0.79445	1	0.994	9.79268e-44	0	reactome-runx1-regulates-transcription-of-genes-involved-in-differentiation-of-hscs
reactome-gaba-synthesis-release-reuptake-and-degradation	8.38434e-47	0.557055	0.991	0.73	1.17548e-43	0	reactome-gaba-synthesis-release-reuptake-and-degradation
reactome-selenoamino-acid-metabolism	2.04543e-46	0.266023	1	1	2.86769e-43	0	reactome-selenoamino-acid-metabolism
reactome-adrenaline-noradrenaline-inhibits-insulin-secretion	5.22757e-45	1.01612	0.97	0.848	7.32905e-42	0	reactome-adrenaline-noradrenaline-inhibits-insulin-secretion
reactome-platelet-homeostasis	1.18417e-44	0.879249	0.985	0.895	1.66021e-41	0	reactome-platelet-homeostasis
reactome-g-beta:gamma-signalling-through-pi3kgamma	7.47903e-44	0.865318	0.973	0.93	1.04856e-40	0	reactome-g-beta:gamma-signalling-through-pi3kgamma
reactome-g-beta:gamma-signalling-through-cdc42	1.0737e-43	0.845293	0.964	0.931	1.50533e-40	0	reactome-g-beta:gamma-signalling-through-cdc42
reactome-regulation-of-insulin-secretion	2.20332e-43	0.671261	0.997	0.968	3.08905e-40	0	reactome-regulation-of-insulin-secretion
reactome-ion-homeostasis	1.22439e-42	0.80908	0.997	0.881	1.71659e-39	0	reactome-ion-homeostasis
reactome-transmission-across-chemical-synapses	3.61788e-41	0.553356	0.928	0.626	5.07226e-38	0	reactome-transmission-across-chemical-synapses
reactome-g-alpha-z-signalling-events	1.48136e-40	0.607439	0.949	0.771	2.07687e-37	0	reactome-g-alpha-z-signalling-events
reactome-protein-methylation	1.99661e-40	0.701726	1	0.997	2.79924e-37	0	reactome-protein-methylation
reactome-prostacyclin-signalling-through-prostacyclin-receptor	2.5226e-40	0.680999	0.964	0.899	3.53668e-37	0	reactome-prostacyclin-signalling-through-prostacyclin-receptor
reactome-gaba-b-receptor-activation	2.54998e-40	0.384867	0.895	0.592	3.57508e-37	0	reactome-gaba-b-receptor-activation
reactome-synthesis-secretion-and-deacylation-of-ghrelin	6.53613e-40	0.554024	0.976	0.898	9.16366e-37	0	reactome-synthesis-secretion-and-deacylation-of-ghrelin
reactome-g-protein-beta:gamma-signalling	2.67865e-39	0.669463	0.964	0.932	3.75547e-36	0	reactome-g-protein-beta:gamma-signalling
reactome-transport-of-small-molecules	3.99444e-38	0.737958	1	0.998	5.6002e-35	0	reactome-transport-of-small-molecules
reactome-fceri-mediated-nf-kb-activation	5.50257e-38	0.690591	1	0.994	7.71461e-35	0	reactome-fceri-mediated-nf-kb-activation
reactome-cd28-dependent-vav1-pathway	1.90224e-37	0.33298	0.979	0.956	2.66694e-34	0	reactome-cd28-dependent-vav1-pathway
reactome-ion-transport-by-p-type-atpases	4.93711e-37	0.438598	0.958	0.898	6.92183e-34	0	reactome-ion-transport-by-p-type-atpases
reactome-opioid-signalling	6.96205e-37	0.758961	0.997	0.956	9.7608e-34	0	reactome-opioid-signalling
reactome-negative-regulation-of-fgfr1-signaling	1.05493e-36	0.447398	1	0.996	1.47901e-33	0	reactome-negative-regulation-of-fgfr1-signaling
reactome-signaling-by-wnt	3.07794e-36	0.266585	1	1	4.31527e-33	0	reactome-signaling-by-wnt
reactome-tetrahydrobiopterin-bh4-synthesis-recycling-salvage-and-regulation	9.25355e-36	0.404507	0.979	0.96	1.29735e-32	0	reactome-tetrahydrobiopterin-bh4-synthesis-recycling-salvage-and-regulation
reactome-integration-of-energy-metabolism	4.06481e-35	0.567759	1	0.999	5.69887e-32	0	reactome-integration-of-energy-metabolism
reactome-negative-regulation-of-fgfr4-signaling	7.45924e-35	0.307482	0.994	0.985	1.04579e-31	0	reactome-negative-regulation-of-fgfr4-signaling
reactome-activation-of-irf3-irf7-mediated-by-tbk1-ikk-epsilon	4.14175e-34	0.464192	0.991	0.994	5.80673e-31	0	reactome-activation-of-irf3-irf7-mediated-by-tbk1-ikk-epsilon
reactome-reduction-of-cytosolic-caplusplus-levels	1.33839e-33	0.503298	0.976	0.946	1.87642e-30	0	reactome-reduction-of-cytosolic-caplusplus-levels
reactome-g-protein-mediated-events	6.98845e-33	0.474267	0.982	0.909	9.79781e-30	0	reactome-g-protein-mediated-events
reactome-interleukin-35-signalling	8.28233e-33	0.467598	0.988	0.993	1.16118e-29	0	reactome-interleukin-35-signalling
reactome-pka-activation-in-glucagon-signalling	9.3231e-33	0.337295	0.877	0.712	1.3071e-29	0	reactome-pka-activation-in-glucagon-signalling
reactome-signal-amplification	1.95974e-32	0.411035	0.928	0.864	2.74755e-29	0	reactome-signal-amplification
reactome-negative-regulation-of-fgfr3-signaling	1.50901e-31	0.253103	1	0.997	2.11563e-28	0	reactome-negative-regulation-of-fgfr3-signaling
reactome-transport-of-nucleosides-and-free-purine-and-pyrimidine-bases-across-the-plasma-membrane	2.01371e-31	0.389693	0.922	0.857	2.82323e-28	0	reactome-transport-of-nucleosides-and-free-purine-and-pyrimidine-bases-across-the-plasma-membrane
reactome-oxidative-stress-induced-senescence	1.02878e-30	0.309746	0.919	0.814	1.44235e-27	0	reactome-oxidative-stress-induced-senescence
reactome-darpp-32-events	1.77304e-30	0.447962	0.991	0.975	2.4858e-27	0	reactome-darpp-32-events
reactome-transferrin-endocytosis-and-recycling	1.92495e-30	0.614772	1	0.996	2.69878e-27	0	reactome-transferrin-endocytosis-and-recycling
reactome-g2-m-checkpoints	7.85688e-30	0.3167	1	1	1.10153e-26	0	reactome-g2-m-checkpoints
reactome-transcriptional-regulation-by-mecp2	1.42967e-29	0.413789	1	0.988	2.0044e-26	0	reactome-transcriptional-regulation-by-mecp2
reactome-plasma-lipoprotein-clearance	2.30939e-29	0.374501	0.961	0.964	3.23776e-26	0	reactome-plasma-lipoprotein-clearance
reactome-rap1-signalling	2.45814e-29	0.51669	0.982	0.989	3.44632e-26	0	reactome-rap1-signalling
reactome-uptake-and-actions-of-bacterial-toxins	4.90641e-29	0.587594	1	0.997	6.87879e-26	0	reactome-uptake-and-actions-of-bacterial-toxins
reactome-interleukin-27-signaling	5.47418e-29	0.481785	0.985	0.994	7.6748e-26	0	reactome-interleukin-27-signaling
reactome-thromboxane-signalling-through-tp-receptor	1.31295e-28	0.278386	0.874	0.77	1.84075e-25	0	reactome-thromboxane-signalling-through-tp-receptor
reactome-signaling-by-the-b-cell-receptor-bcr	1.33782e-27	0.429919	1	0.999	1.87562e-24	0	reactome-signaling-by-the-b-cell-receptor-bcr
reactome-tnfr2-non-canonical-nf-kb-pathway	1.52046e-27	0.271094	1	1	2.13169e-24	0	reactome-tnfr2-non-canonical-nf-kb-pathway
reactome-inla-mediated-entry-of-listeria-monocytogenes-into-host-cells	1.78578e-27	0.480937	1	1	2.50367e-24	0	reactome-inla-mediated-entry-of-listeria-monocytogenes-into-host-cells
reactome-cooperation-of-pdcl-phlp1-and-tric-cct-in-g-protein-beta-folding	1.02326e-26	0.505068	1	0.999	1.43461e-23	0	reactome-cooperation-of-pdcl-phlp1-and-tric-cct-in-g-protein-beta-folding
reactome-signaling-by-notch	2.08153e-26	0.310854	1	1	2.9183e-23	0	reactome-signaling-by-notch
reactome-advanced-glycosylation-endproduct-receptor-signaling	3.27485e-26	0.340106	0.991	0.996	4.59134e-23	0	reactome-advanced-glycosylation-endproduct-receptor-signaling
reactome-ca2plus-pathway	5.6323e-26	0.43494	0.925	0.936	7.89648e-23	0	reactome-ca2plus-pathway
reactome-glutamate-binding-activation-of-ampa-receptors-and-synaptic-plasticity	4.99775e-25	0.333413	0.937	0.832	7.00685e-22	0	reactome-glutamate-binding-activation-of-ampa-receptors-and-synaptic-plasticity
reactome-neurotransmitter-receptors-and-postsynaptic-signal-transmission	7.53606e-25	0.345392	0.787	0.557	1.05656e-21	0	reactome-neurotransmitter-receptors-and-postsynaptic-signal-transmission
reactome-pka-mediated-phosphorylation-of-creb	7.93321e-25	0.298899	0.88	0.842	1.11224e-21	0	reactome-pka-mediated-phosphorylation-of-creb
reactome-glycogen-storage-diseases	3.4177e-24	0.454396	1	0.997	4.79162e-21	0	reactome-glycogen-storage-diseases
reactome-sema3a-pak-dependent-axon-repulsion	4.29413e-24	0.541724	0.997	0.999	6.02037e-21	0	reactome-sema3a-pak-dependent-axon-repulsion
reactome-traf6-mediated-induction-of-tak1-complex-within-tlr4-complex	5.93674e-24	0.336313	1	0.997	8.32331e-21	0	reactome-traf6-mediated-induction-of-tak1-complex-within-tlr4-complex
reactome-rho-gtpases-activate-ktn1	6.39442e-24	0.466353	1	1	8.96498e-21	0	reactome-rho-gtpases-activate-ktn1
reactome-myoclonic-epilepsy-of-lafora	1.3827e-23	0.4458	1	1	1.93855e-20	0	reactome-myoclonic-epilepsy-of-lafora
reactome-fc-epsilon-receptor-fceri-signaling	2.05286e-23	0.310373	1	0.999	2.87812e-20	0	reactome-fc-epsilon-receptor-fceri-signaling
reactome-golgi-cisternae-pericentriolar-stack-reorganization	5.79937e-23	0.391978	0.985	0.997	8.13072e-20	0	reactome-golgi-cisternae-pericentriolar-stack-reorganization
reactome-ticam1-dependent-activation-of-irf3-irf7	1.78062e-22	0.34237	1	0.998	2.49643e-19	0	reactome-ticam1-dependent-activation-of-irf3-irf7
reactome-traf6-mediated-irf7-activation-in-tlr7-8-or-9-signaling	3.58093e-22	0.445686	1	0.999	5.02046e-19	0	reactome-traf6-mediated-irf7-activation-in-tlr7-8-or-9-signaling
reactome-pp2a-mediated-dephosphorylation-of-key-metabolic-factors	5.02993e-21	0.525961	0.907	0.937	7.05196e-18	0	reactome-pp2a-mediated-dephosphorylation-of-key-metabolic-factors
reactome-nef-mediated-cd4-down-regulation	5.42357e-21	0.436423	0.874	0.931	7.60384e-18	0	reactome-nef-mediated-cd4-down-regulation
reactome-ptk6-regulates-rtks-and-their-effectors-akt1-and-dok1	6.71234e-21	0.39167	1	1	9.41071e-18	0	reactome-ptk6-regulates-rtks-and-their-effectors-akt1-and-dok1
reactome-mastl-facilitates-mitotic-progression	7.61105e-21	0.290446	0.979	0.989	1.06707e-17	0	reactome-mastl-facilitates-mitotic-progression
reactome-regulation-of-gene-expression-in-beta-cells	2.01296e-19	0.371915	0.991	0.849	2.82216e-16	0	reactome-regulation-of-gene-expression-in-beta-cells
reactome-adenylate-cyclase-inhibitory-pathway	1.14145e-18	0.27648	0.73	0.597	1.60031e-15	0	reactome-adenylate-cyclase-inhibitory-pathway
reactome-regulation-of-beta-cell-development	1.63387e-17	0.392382	0.982	0.938	2.29069e-14	0	reactome-regulation-of-beta-cell-development
reactome-akt-phosphorylates-targets-in-the-nucleus	2.94315e-17	0.291246	0.838	0.881	4.1263e-14	0	reactome-akt-phosphorylates-targets-in-the-nucleus
reactome-notch2-activation-and-transmission-of-signal-to-the-nucleus	6.45325e-17	0.319819	1	0.999	9.04746e-14	0	reactome-notch2-activation-and-transmission-of-signal-to-the-nucleus
reactome-the-role-of-nef-in-hiv-1-replication-and-disease-pathogenesis	2.32854e-16	0.352145	1	0.999	3.26461e-13	0	reactome-the-role-of-nef-in-hiv-1-replication-and-disease-pathogenesis
reactome-neurofascin-interactions	6.99721e-16	0.334448	0.724	0.593	9.81008e-13	0	reactome-neurofascin-interactions
reactome-josephin-domain-dubs	1.55405e-15	0.295813	1	1	2.17877e-12	0	reactome-josephin-domain-dubs
reactome-rho-gtpases-activate-cit	8.36488e-15	0.30024	1	1	1.17276e-11	0	reactome-rho-gtpases-activate-cit
reactome-insulin-receptor-recycling	1.19812e-14	0.278699	1	0.999	1.67976e-11	0	reactome-insulin-receptor-recycling
reactome-activation-of-the-ap-1-family-of-transcription-factors	7.56427e-14	0.315092	0.892	0.96	1.06051e-10	0	reactome-activation-of-the-ap-1-family-of-transcription-factors
reactome-transcriptional-regulation-by-runx1	1.58633e-13	0.264013	1	0.999	2.22404e-10	0	reactome-transcriptional-regulation-by-runx1
reactome-gluconeogenesis	2.17582e-13	0.311114	1	0.998	3.0505e-10	0	reactome-gluconeogenesis
reactome-signaling-by-notch2	4.8746e-13	0.281193	1	0.999	6.83419e-10	0	reactome-signaling-by-notch2
reactome-nef-mediates-down-modulation-of-cell-surface-receptors-by-recruiting-them-to-clathrin-adapters	2.60939e-12	0.270999	0.997	1	3.65837e-09	0	reactome-nef-mediates-down-modulation-of-cell-surface-receptors-by-recruiting-them-to-clathrin-adapters
reactome-recycling-pathway-of-l1	4.85283e-12	0.25092	0.997	1	6.80367e-09	0	reactome-recycling-pathway-of-l1
reactome-regulation-of-localization-of-foxo-transcription-factors	7.03533e-12	0.277922	0.997	1	9.86353e-09	0	reactome-regulation-of-localization-of-foxo-transcription-factors
reactome-cargo-concentration-in-the-er	3.38444e-11	0.291067	0.988	0.997	4.74498e-08	0	reactome-cargo-concentration-in-the-er
reactome-regulation-of-mecp2-expression-and-activity	8.27458e-11	0.251311	1	0.999	1.1601e-07	0	reactome-regulation-of-mecp2-expression-and-activity
reactome-insulin-processing	2.19705e-10	0.259089	1	0.993	3.08026e-07	0	reactome-insulin-processing
reactome-mecp2-regulates-transcription-of-neuronal-ligands	2.19069e-08	0.334645	0.748	0.852	3.07134e-05	0	reactome-mecp2-regulates-transcription-of-neuronal-ligands
reactome-lrr-flii-interacting-protein-1-lrrfip1-activates-type-i-ifn-production	7.24202e-08	0.749748	0.706	0.835	0.000101533	0	reactome-lrr-flii-interacting-protein-1-lrrfip1-activates-type-i-ifn-production
reactome-nef-mediated-cd8-down-regulation	4.82679e-07	0.381446	0.691	0.815	0.000676717	0	reactome-nef-mediated-cd8-down-regulation
reactome-n-glycan-trimming-and-elongation-in-the-cis-golgi	0.0040588	0.416414	0.625	0.733	1	0	reactome-n-glycan-trimming-and-elongation-in-the-cis-golgi
reactome-cytokine-signaling-in-immune-system	1.84278e-101	0.985985	1	1	2.58357e-98	1	reactome-cytokine-signaling-in-immune-system
reactome-trail-signaling	2.18088e-99	0.528914	0.926	0.213	3.05759e-96	1	reactome-trail-signaling
reactome-laminin-interactions	3.50541e-99	0.255271	0.804	0.162	4.91458e-96	1	reactome-laminin-interactions
reactome-interferon-signaling	2.46132e-90	1.08613	1	0.999	3.45077e-87	1	reactome-interferon-signaling
reactome-transcriptional-regulation-by-runx3	1.01165e-89	0.455237	1	1	1.41834e-86	1	reactome-transcriptional-regulation-by-runx3
reactome-metabolism-of-lipids	3.21794e-82	0.743795	1	0.998	4.51155e-79	1	reactome-metabolism-of-lipids
reactome-type-i-hemidesmosome-assembly	7.96198e-80	0.343505	0.852	0.199	1.11627e-76	1	reactome-type-i-hemidesmosome-assembly
reactome-signaling-by-hippo	2.05974e-78	1.66583	1	0.966	2.88776e-75	1	reactome-signaling-by-hippo
reactome-signaling-by-tgf-beta-receptor-complex	8.96955e-76	0.494457	1	1	1.25753e-72	1	reactome-signaling-by-tgf-beta-receptor-complex
reactome-mitochondrial-translation	1.42001e-69	0.717266	1	0.994	1.99086e-66	1	reactome-mitochondrial-translation
reactome-programmed-cell-death	4.10878e-66	0.279019	1	1	5.76051e-63	1	reactome-programmed-cell-death
reactome-signaling-by-tgf-beta-family-members	1.03494e-64	0.544372	1	1	1.45099e-61	1	reactome-signaling-by-tgf-beta-family-members
reactome-clec7a-dectin-1-signaling	1.03118e-62	0.304206	1	1	1.44572e-59	1	reactome-clec7a-dectin-1-signaling
reactome-c-type-lectin-receptors-clrs	3.41914e-61	0.333574	1	1	4.79364e-58	1	reactome-c-type-lectin-receptors-clrs
reactome-smad2-smad3:smad4-heterotrimer-regulates-transcription	5.52463e-61	0.85412	1	0.999	7.74553e-58	1	reactome-smad2-smad3:smad4-heterotrimer-regulates-transcription
reactome-signaling-by-interleukins	6.30675e-59	0.566658	1	1	8.84207e-56	1	reactome-signaling-by-interleukins
reactome-regulation-of-innate-immune-responses-to-cytosolic-dna	5.50201e-58	0.404417	0.99	0.967	7.71382e-55	1	reactome-regulation-of-innate-immune-responses-to-cytosolic-dna
reactome-death-receptor-signalling	9.21533e-57	0.733016	1	0.999	1.29199e-53	1	reactome-death-receptor-signalling
reactome-gab1-signalosome	3.44292e-52	0.589449	0.916	0.305	4.82697e-49	1	reactome-gab1-signalosome
reactome-activation-of-nf-kappab-in-b-cells	5.65316e-51	0.260706	1	1	7.92573e-48	1	reactome-activation-of-nf-kappab-in-b-cells
reactome-signaling-by-receptor-tyrosine-kinases	2.6922e-49	0.373328	1	1	3.77446e-46	1	reactome-signaling-by-receptor-tyrosine-kinases
reactome-transcriptional-regulation-by-runx2	8.429e-49	0.319241	1	1	1.18175e-45	1	reactome-transcriptional-regulation-by-runx2
reactome-nucleotide-binding-domain-leucine-rich-repeat-containing-receptor-nlr-signaling-pathways	1.23154e-47	1.22008	1	0.994	1.72662e-44	1	reactome-nucleotide-binding-domain-leucine-rich-repeat-containing-receptor-nlr-signaling-pathways
reactome-signaling-by-egfr	1.84518e-44	0.930545	1	0.999	2.58694e-41	1	reactome-signaling-by-egfr
reactome-signaling-by-erbb2	2.75993e-43	0.881337	1	0.997	3.86942e-40	1	reactome-signaling-by-erbb2
reactome-mitochondrial-fatty-acid-beta-oxidation-of-saturated-fatty-acids	3.52277e-43	0.419023	0.997	0.925	4.93893e-40	1	reactome-mitochondrial-fatty-acid-beta-oxidation-of-saturated-fatty-acids
reactome-downstream-signal-transduction	2.41141e-42	1.03798	1	0.977	3.3808e-39	1	reactome-downstream-signal-transduction
reactome-deubiquitination	5.99026e-42	0.28442	1	1	8.39835e-39	1	reactome-deubiquitination
reactome-interleukin-1-family-signaling	6.79088e-42	0.267752	1	1	9.52081e-39	1	reactome-interleukin-1-family-signaling
reactome-regulation-by-c-flip	6.8383e-42	0.284204	0.836	0.288	9.58729e-39	1	reactome-regulation-by-c-flip
reactome-downregulation-of-tgf-beta-receptor-signaling	3.67782e-41	0.646601	1	0.999	5.15631e-38	1	reactome-downregulation-of-tgf-beta-receptor-signaling
reactome-transcriptional-activity-of-smad2-smad3:smad4-heterotrimer	2.69993e-40	0.378579	1	1	3.78531e-37	1	reactome-transcriptional-activity-of-smad2-smad3:smad4-heterotrimer
reactome-downstream-tcr-signaling	1.26488e-39	0.270512	1	1	1.77336e-36	1	reactome-downstream-tcr-signaling
reactome-cytosolic-sensors-of-pathogen-associated-dna	1.6009e-39	0.494834	1	0.999	2.24446e-36	1	reactome-cytosolic-sensors-of-pathogen-associated-dna
reactome-gene-expression-transcription	1.62436e-39	0.298702	1	1	2.27735e-36	1	reactome-gene-expression-transcription
reactome-non-integrin-membrane-ecm-interactions	6.59473e-38	1.20239	0.977	0.452	9.24581e-35	1	reactome-non-integrin-membrane-ecm-interactions
reactome-citric-acid-cycle-tca-cycle	7.53354e-38	0.687395	0.997	0.977	1.0562e-34	1	reactome-citric-acid-cycle-tca-cycle
reactome-eph-ephrin-mediated-repulsion-of-cells	1.33635e-37	0.427418	0.958	0.926	1.87356e-34	1	reactome-eph-ephrin-mediated-repulsion-of-cells
reactome-nod1-2-signaling-pathway	2.01918e-37	1.1395	1	0.994	2.83089e-34	1	reactome-nod1-2-signaling-pathway
reactome-disorders-of-transmembrane-transporters	2.01569e-36	0.352371	1	1	2.826e-33	1	reactome-disorders-of-transmembrane-transporters
reactome-signaling-by-met	3.09959e-35	0.403647	1	1	4.34563e-32	1	reactome-signaling-by-met
reactome-metabolism-of-carbohydrates	3.15807e-35	0.689069	1	0.997	4.42762e-32	1	reactome-metabolism-of-carbohydrates
reactome-tcr-signaling	5.58258e-35	0.272564	1	1	7.82677e-32	1	reactome-tcr-signaling
reactome-glycosphingolipid-metabolism	1.02397e-34	0.299948	0.968	0.895	1.43561e-31	1	reactome-glycosphingolipid-metabolism
reactome-regulation-of-gene-expression-by-hypoxia-inducible-factor	5.23464e-34	0.252427	0.997	0.949	7.33897e-31	1	reactome-regulation-of-gene-expression-by-hypoxia-inducible-factor
reactome-miscellaneous-transport-and-binding-events	5.3238e-33	0.578868	0.977	0.894	7.46396e-30	1	reactome-miscellaneous-transport-and-binding-events
reactome-conversion-from-apc-c:cdc20-to-apc-c:cdh1-in-late-anaphase	1.73638e-32	0.258685	0.971	0.876	2.43441e-29	1	reactome-conversion-from-apc-c:cdc20-to-apc-c:cdh1-in-late-anaphase
reactome-regulation-of-lipid-metabolism-by-peroxisome-proliferator-activated-receptor-alpha-pparalpha	3.23214e-32	0.555064	1	0.996	4.53146e-29	1	reactome-regulation-of-lipid-metabolism-by-peroxisome-proliferator-activated-receptor-alpha-pparalpha
reactome-tgf-beta-receptor-signaling-activates-smads	1.00806e-31	0.39313	1	0.999	1.4133e-28	1	reactome-tgf-beta-receptor-signaling-activates-smads
reactome-perk-regulates-gene-expression	1.11453e-31	0.853808	1	0.978	1.56257e-28	1	reactome-perk-regulates-gene-expression
reactome-toll-like-receptor-cascades	5.71183e-31	0.549285	1	0.999	8.00799e-28	1	reactome-toll-like-receptor-cascades
reactome-ephrin-signaling	1.6361e-30	0.518773	0.984	0.889	2.29381e-27	1	reactome-ephrin-signaling
reactome-integrin-signaling	1.71402e-30	0.312845	0.977	0.854	2.40306e-27	1	reactome-integrin-signaling
reactome-rrna-modification-in-the-nucleus-and-cytosol	2.4467e-30	0.612655	1	0.996	3.43027e-27	1	reactome-rrna-modification-in-the-nucleus-and-cytosol
reactome-generic-transcription-pathway	3.54073e-30	0.323608	1	1	4.96411e-27	1	reactome-generic-transcription-pathway
reactome-signaling-by-fgfr2-in-disease	7.21841e-30	0.348308	0.99	0.896	1.01202e-26	1	reactome-signaling-by-fgfr2-in-disease
reactome-apoptotic-cleavage-of-cellular-proteins	9.7572e-30	0.457118	1	0.999	1.36796e-26	1	reactome-apoptotic-cleavage-of-cellular-proteins
reactome-innate-immune-system	1.70458e-29	0.253286	1	0.999	2.38983e-26	1	reactome-innate-immune-system
reactome-sema4d-in-semaphorin-signaling	9.97773e-29	0.523493	1	1	1.39888e-25	1	reactome-sema4d-in-semaphorin-signaling
reactome-trif-ticam1-mediated-tlr4-signaling	1.6671e-28	0.282117	1	1	2.33727e-25	1	reactome-trif-ticam1-mediated-tlr4-signaling
reactome-mitotic-g1-g1-s-phases	3.63241e-28	0.252144	1	1	5.09263e-25	1	reactome-mitotic-g1-g1-s-phases
reactome-signalling-to-ras	4.0826e-28	0.315098	0.99	0.863	5.7238e-25	1	reactome-signalling-to-ras
reactome-clec7a-dectin-1-induces-nfat-activation	1.43055e-27	0.311103	0.987	0.962	2.00563e-24	1	reactome-clec7a-dectin-1-induces-nfat-activation
reactome-toll-like-receptor-4-tlr4-cascade	2.0946e-27	0.428582	1	0.999	2.93663e-24	1	reactome-toll-like-receptor-4-tlr4-cascade
reactome-pyruvate-metabolism-and-citric-acid-tca-cycle	1.29641e-26	0.416447	1	0.996	1.81756e-23	1	reactome-pyruvate-metabolism-and-citric-acid-tca-cycle
reactome-myd88-cascade-initiated-on-plasma-membrane	2.29314e-26	0.274528	1	1	3.21498e-23	1	reactome-myd88-cascade-initiated-on-plasma-membrane
reactome-runx3-regulates-notch-signaling	1.94046e-25	0.371826	0.971	0.864	2.72053e-22	1	reactome-runx3-regulates-notch-signaling
reactome-signaling-by-leptin	6.06944e-25	0.310103	0.891	0.797	8.50935e-22	1	reactome-signaling-by-leptin
reactome-metabolism-of-non-coding-rna	8.01838e-25	0.527107	1	0.99	1.12418e-21	1	reactome-metabolism-of-non-coding-rna
reactome-metabolism-of-vitamins-and-cofactors	2.13879e-24	1.91192	0.994	0.845	2.99859e-21	1	reactome-metabolism-of-vitamins-and-cofactors
reactome-tgf-beta-receptor-signaling-in-emt-epithelial-to-mesenchymal-transition	3.09089e-24	0.595062	1	1	4.33342e-21	1	reactome-tgf-beta-receptor-signaling-in-emt-epithelial-to-mesenchymal-transition
reactome-diseases-of-metabolism	4.99346e-24	0.325522	0.894	0.756	7.00083e-21	1	reactome-diseases-of-metabolism
reactome-rna-polymerase-iii-transcription-termination	7.83165e-24	0.965275	1	0.968	1.098e-20	1	reactome-rna-polymerase-iii-transcription-termination
reactome-p38mapk-events	7.86654e-24	0.386133	0.99	0.871	1.10289e-20	1	reactome-p38mapk-events
reactome-intrinsic-pathway-for-apoptosis	1.14793e-23	0.919745	1	0.999	1.6094e-20	1	reactome-intrinsic-pathway-for-apoptosis
reactome-nuclear-envelope-breakdown	5.80151e-23	0.914286	1	0.958	8.13371e-20	1	reactome-nuclear-envelope-breakdown
reactome-dna-replication	5.81217e-23	0.250375	1	1	8.14867e-20	1	reactome-dna-replication
reactome-toll-like-receptor-9-tlr9-cascade	1.54946e-22	0.279454	1	1	2.17234e-19	1	reactome-toll-like-receptor-9-tlr9-cascade
reactome-transcriptional-regulation-of-white-adipocyte-differentiation	3.80451e-22	0.853128	1	0.979	5.33392e-19	1	reactome-transcriptional-regulation-of-white-adipocyte-differentiation
reactome-rna-polymerase-iii-transcription	5.40554e-22	0.780763	1	0.979	7.57856e-19	1	reactome-rna-polymerase-iii-transcription
reactome-signaling-by-non-receptor-tyrosine-kinases	2.6204e-21	0.550872	1	0.998	3.67381e-18	1	reactome-signaling-by-non-receptor-tyrosine-kinases
reactome-vitamin-b5-pantothenate-metabolism	5.26849e-21	0.302013	0.859	0.766	7.38642e-18	1	reactome-vitamin-b5-pantothenate-metabolism
reactome-ikba-variant-leads-to-eda-id	3.73998e-20	1.26326	0.974	0.602	5.24345e-17	1	reactome-ikba-variant-leads-to-eda-id
reactome-synthesis-of-pc	6.6619e-20	0.529735	0.971	0.819	9.33998e-17	1	reactome-synthesis-of-pc
reactome-signaling-by-fgfr	8.57441e-20	0.335372	1	1	1.20213e-16	1	reactome-signaling-by-fgfr
reactome-tie2-signaling	1.19352e-19	0.588637	0.99	0.838	1.67332e-16	1	reactome-tie2-signaling
reactome-tnfr1-induced-nfkappab-signaling-pathway	1.71235e-19	0.595247	1	0.999	2.40072e-16	1	reactome-tnfr1-induced-nfkappab-signaling-pathway
reactome-zinc-transporters	3.63329e-19	0.541024	0.929	0.803	5.09387e-16	1	reactome-zinc-transporters
reactome-signaling-by-erbb4	4.61904e-19	0.691148	0.997	0.964	6.47589e-16	1	reactome-signaling-by-erbb4
reactome-signaling-by-ligand-responsive-egfr-variants-in-cancer	7.18959e-19	0.515783	1	1	1.00798e-15	1	reactome-signaling-by-ligand-responsive-egfr-variants-in-cancer
reactome-phospholipid-metabolism	1.07199e-18	0.695034	1	0.988	1.50293e-15	1	reactome-phospholipid-metabolism
reactome-p75ntr-signals-via-nf-kb	1.14529e-18	0.567131	1	1	1.60569e-15	1	reactome-p75ntr-signals-via-nf-kb
reactome-viral-messenger-rna-synthesis	1.57001e-18	0.495379	1	0.991	2.20115e-15	1	reactome-viral-messenger-rna-synthesis
reactome-vegfr2-mediated-cell-proliferation	6.00794e-18	0.555021	1	0.954	8.42313e-15	1	reactome-vegfr2-mediated-cell-proliferation
reactome-glycerophospholipid-biosynthesis	1.06186e-17	0.670291	0.987	0.834	1.48872e-14	1	reactome-glycerophospholipid-biosynthesis
reactome-mucopolysaccharidoses	1.60873e-17	0.682724	0.994	0.902	2.25544e-14	1	reactome-mucopolysaccharidoses
reactome-ddx58-ifih1-mediated-induction-of-interferon-alpha-beta	1.68308e-17	0.604157	1	0.999	2.35968e-14	1	reactome-ddx58-ifih1-mediated-induction-of-interferon-alpha-beta
reactome-tysnd1-cleaves-peroxisomal-proteins	2.1055e-17	1.1814	0.994	0.768	2.95191e-14	1	reactome-tysnd1-cleaves-peroxisomal-proteins
reactome-metal-ion-slc-transporters	2.11846e-17	0.769593	0.981	0.865	2.97009e-14	1	reactome-metal-ion-slc-transporters
reactome-glutathione-conjugation	3.28558e-17	1.53333	0.99	0.928	4.60638e-14	1	reactome-glutathione-conjugation
reactome-toll-like-receptor-tlr1:tlr2-cascade	3.96136e-17	0.297744	1	1	5.55382e-14	1	reactome-toll-like-receptor-tlr1:tlr2-cascade
reactome-peroxisomal-protein-import	4.30276e-17	0.513769	1	1	6.03248e-14	1	reactome-peroxisomal-protein-import
reactome-transcriptional-regulation-by-the-ap-2-tfap2-family-of-transcription-factors	6.11905e-17	0.475112	1	0.785	8.5789e-14	1	reactome-transcriptional-regulation-by-the-ap-2-tfap2-family-of-transcription-factors
reactome-p75-ntr-receptor-mediated-signalling	8.67393e-17	0.532451	1	1	1.21608e-13	1	reactome-p75-ntr-receptor-mediated-signalling
reactome-sumoylation-of-ubiquitinylation-proteins	1.27183e-16	0.553703	1	0.982	1.7831e-13	1	reactome-sumoylation-of-ubiquitinylation-proteins
reactome-tnf-signaling	1.33316e-16	0.633707	1	0.998	1.86909e-13	1	reactome-tnf-signaling
reactome-regulated-necrosis	3.03312e-16	1.40497	1	0.989	4.25243e-13	1	reactome-regulated-necrosis
reactome-rna-polymerase-i-transcription-initiation	6.81273e-16	0.531843	1	0.988	9.55145e-13	1	reactome-rna-polymerase-i-transcription-initiation
reactome-mitochondrial-fatty-acid-beta-oxidation	8.1529e-16	0.812289	0.997	0.937	1.14304e-12	1	reactome-mitochondrial-fatty-acid-beta-oxidation
reactome-regulation-of-gene-expression-in-late-stage-branching-morphogenesis-pancreatic-bud-precursor-cells	1.03966e-15	0.626392	0.945	0.804	1.4576e-12	1	reactome-regulation-of-gene-expression-in-late-stage-branching-morphogenesis-pancreatic-bud-precursor-cells
reactome-signaling-by-egfr-in-cancer	1.53682e-15	1.06606	1	0.997	2.15462e-12	1	reactome-signaling-by-egfr-in-cancer
reactome-downregulation-of-erbb2-signaling	2.57864e-15	0.579992	1	0.988	3.61525e-12	1	reactome-downregulation-of-erbb2-signaling
reactome-erythropoietin-activates-ras	2.71375e-15	0.389754	0.987	0.89	3.80468e-12	1	reactome-erythropoietin-activates-ras
reactome-ovarian-tumor-domain-proteases	2.92956e-15	0.544168	1	0.998	4.10724e-12	1	reactome-ovarian-tumor-domain-proteases
reactome-traf3-dependent-irf-activation-pathway	2.32965e-14	0.633844	0.971	0.828	3.26616e-11	1	reactome-traf3-dependent-irf-activation-pathway
reactome-notch4-activation-and-transmission-of-signal-to-the-nucleus	2.39821e-14	0.691243	0.958	0.871	3.36229e-11	1	reactome-notch4-activation-and-transmission-of-signal-to-the-nucleus
reactome-rna-polymerase-ii-transcribes-snrna-genes	3.29019e-14	0.545598	1	0.984	4.61285e-11	1	reactome-rna-polymerase-ii-transcribes-snrna-genes
reactome-met-activates-rap1-and-rac1	3.74974e-14	0.893681	1	0.975	5.25713e-11	1	reactome-met-activates-rap1-and-rac1
reactome-signaling-by-fgfr1	5.32749e-14	0.611403	1	0.981	7.46914e-11	1	reactome-signaling-by-fgfr1
reactome-fatty-acid-metabolism	7.93805e-14	0.842668	0.961	0.81	1.11291e-10	1	reactome-fatty-acid-metabolism
reactome-transcriptional-activation-of-mitochondrial-biogenesis	7.96602e-14	0.535123	1	0.993	1.11684e-10	1	reactome-transcriptional-activation-of-mitochondrial-biogenesis
reactome-metabolism-of-steroids	7.96876e-14	0.902152	1	0.987	1.11722e-10	1	reactome-metabolism-of-steroids
reactome-shc1-events-in-erbb2-signaling	8.79965e-14	0.515906	0.99	0.468	1.23371e-10	1	reactome-shc1-events-in-erbb2-signaling
reactome-trna-aminoacylation	4.42317e-13	0.302301	1	0.997	6.20128e-10	1	reactome-trna-aminoacylation
reactome-mrna-capping	8.48602e-13	0.469187	1	0.986	1.18974e-09	1	reactome-mrna-capping
reactome-rip-mediated-nfkb-activation-via-zbp1	1.2608e-12	1.51453	0.99	0.825	1.76764e-09	1	reactome-rip-mediated-nfkb-activation-via-zbp1
reactome-rna-polymerase-ii-transcription-elongation	1.75369e-12	0.383352	1	0.994	2.45867e-09	1	reactome-rna-polymerase-ii-transcription-elongation
reactome-branched-chain-amino-acid-catabolism	1.78547e-12	0.746639	0.994	0.965	2.50324e-09	1	reactome-branched-chain-amino-acid-catabolism
reactome-transport-of-the-slbp-dependant-mature-mrna	2.21336e-12	0.600463	1	0.974	3.10313e-09	1	reactome-transport-of-the-slbp-dependant-mature-mrna
reactome-gap-filling-dna-repair-synthesis-and-ligation-in-gg-ner	2.6153e-12	0.443295	0.981	0.979	3.66666e-09	1	reactome-gap-filling-dna-repair-synthesis-and-ligation-in-gg-ner
reactome-tp53-regulates-transcription-of-cell-death-genes	4.39112e-12	0.947178	0.958	0.504	6.15636e-09	1	reactome-tp53-regulates-transcription-of-cell-death-genes
reactome-rna-polymerase-ii-pre-transcription-events	8.15812e-12	0.286464	1	0.997	1.14377e-08	1	reactome-rna-polymerase-ii-pre-transcription-events
reactome-nuclear-import-of-rev-protein	9.4166e-12	0.528191	1	0.992	1.32021e-08	1	reactome-nuclear-import-of-rev-protein
reactome-signaling-by-scf-kit	1.11767e-11	0.7799	1	0.883	1.56697e-08	1	reactome-signaling-by-scf-kit
reactome-signaling-by-fgfr1-in-disease	1.33294e-11	0.354491	1	0.97	1.86878e-08	1	reactome-signaling-by-fgfr1-in-disease
reactome-trna-processing-in-the-nucleus	1.68211e-11	0.8351	1	0.952	2.35832e-08	1	reactome-trna-processing-in-the-nucleus
reactome-sumoylation-of-sumoylation-proteins	1.71447e-11	0.509653	1	0.985	2.40369e-08	1	reactome-sumoylation-of-sumoylation-proteins
reactome-hur-elavl1-binds-and-stabilizes-mrna	1.72831e-11	0.438971	0.997	0.884	2.42309e-08	1	reactome-hur-elavl1-binds-and-stabilizes-mrna
reactome-sumoylation-of-dna-damage-response-and-repair-proteins	2.66497e-11	0.269399	1	0.999	3.73629e-08	1	reactome-sumoylation-of-dna-damage-response-and-repair-proteins
reactome-nrage-signals-death-through-jnk	2.66759e-11	0.257578	0.804	0.667	3.73996e-08	1	reactome-nrage-signals-death-through-jnk
reactome-interactions-of-rev-with-host-cellular-proteins	2.77599e-11	0.440493	1	0.992	3.89194e-08	1	reactome-interactions-of-rev-with-host-cellular-proteins
reactome-ticam1-rip1-mediated-ikk-complex-recruitment	4.30431e-11	0.377326	1	1	6.03465e-08	1	reactome-ticam1-rip1-mediated-ikk-complex-recruitment
reactome-transport-of-mature-mrnas-derived-from-intronless-transcripts	4.34174e-11	0.484238	1	0.981	6.08712e-08	1	reactome-transport-of-mature-mrnas-derived-from-intronless-transcripts
reactome-transcription-of-the-hiv-genome	1.03917e-10	0.39113	1	0.994	1.45692e-07	1	reactome-transcription-of-the-hiv-genome
reactome-atf4-activates-genes-in-response-to-endoplasmic-reticulum-stress	1.63688e-10	1.10824	0.997	0.896	2.29491e-07	1	reactome-atf4-activates-genes-in-response-to-endoplasmic-reticulum-stress
reactome-nf-kb-activation-through-fadd-rip-1-pathway-mediated-by-caspase-8-and-10	2.09947e-10	1.56404	0.965	0.652	2.94345e-07	1	reactome-nf-kb-activation-through-fadd-rip-1-pathway-mediated-by-caspase-8-and-10
reactome-sphingolipid-metabolism	2.31225e-10	0.6696	1	0.988	3.24178e-07	1	reactome-sphingolipid-metabolism
reactome-interactions-of-vpr-with-host-cellular-proteins	2.39465e-10	0.521446	1	0.987	3.3573e-07	1	reactome-interactions-of-vpr-with-host-cellular-proteins
reactome-traf6-mediated-nf-kb-activation	2.78668e-10	1.27847	0.997	0.936	3.90693e-07	1	reactome-traf6-mediated-nf-kb-activation
reactome-interferon-gamma-signaling	3.41381e-10	1.44563	0.987	0.639	4.78616e-07	1	reactome-interferon-gamma-signaling
reactome-rna-polymerase-ii-transcription-pre-initiation-and-promoter-opening	4.5092e-10	0.356514	1	0.993	6.3219e-07	1	reactome-rna-polymerase-ii-transcription-pre-initiation-and-promoter-opening
reactome-diseases-associated-with-n-glycosylation-of-proteins	4.66991e-10	1.41825	0.971	0.772	6.54722e-07	1	reactome-diseases-associated-with-n-glycosylation-of-proteins
reactome-export-of-viral-ribonucleoproteins-from-nucleus	5.68548e-10	0.498679	1	0.986	7.97104e-07	1	reactome-export-of-viral-ribonucleoproteins-from-nucleus
reactome-sema4d-induced-cell-migration-and-growth-cone-collapse	7.09679e-10	0.465661	1	0.999	9.94969e-07	1	reactome-sema4d-induced-cell-migration-and-growth-cone-collapse
reactome-diseases-of-immune-system	1.05208e-09	0.279554	0.756	0.385	1.47502e-06	1	reactome-diseases-of-immune-system
reactome-foxo-mediated-transcription	1.50203e-09	0.360599	1	0.996	2.10585e-06	1	reactome-foxo-mediated-transcription
reactome-class-i-peroxisomal-membrane-protein-import	1.57662e-09	0.390276	0.974	0.875	2.21042e-06	1	reactome-class-i-peroxisomal-membrane-protein-import
reactome-tp53-regulates-transcription-of-genes-involved-in-g2-cell-cycle-arrest	2.6251e-09	0.305747	0.878	0.686	3.68039e-06	1	reactome-tp53-regulates-transcription-of-genes-involved-in-g2-cell-cycle-arrest
reactome-disassembly-of-the-destruction-complex-and-recruitment-of-axin-to-the-membrane	3.96857e-09	0.747275	1	0.982	5.56394e-06	1	reactome-disassembly-of-the-destruction-complex-and-recruitment-of-axin-to-the-membrane
reactome-signaling-by-the-b-cell-receptor-bcr1	4.15281e-09	0.344332	1	0.999	5.82224e-06	1	reactome-signaling-by-the-b-cell-receptor-bcr
reactome-signaling-by-wnt-in-cancer	4.94249e-09	0.460205	0.997	0.993	6.92937e-06	1	reactome-signaling-by-wnt-in-cancer
reactome-mtor-signalling	7.54975e-09	0.289167	1	0.997	1.05847e-05	1	reactome-mtor-signalling
reactome-met-activates-ras-signaling	7.9313e-09	1.56284	0.997	0.803	1.11197e-05	1	reactome-met-activates-ras-signaling
reactome-hiv-elongation-arrest-and-recovery	9.29928e-09	0.457112	1	0.967	1.30376e-05	1	reactome-hiv-elongation-arrest-and-recovery
reactome-regulation-of-tnfr1-signaling	1.29868e-08	0.592534	1	0.998	1.82075e-05	1	reactome-regulation-of-tnfr1-signaling
reactome-signaling-by-egfrviii-in-cancer	1.60401e-08	1.38508	0.994	0.884	2.24882e-05	1	reactome-signaling-by-egfrviii-in-cancer
reactome-zinc-influx-into-cells-by-the-slc39-gene-family	1.81278e-08	0.297233	0.897	0.681	2.54152e-05	1	reactome-zinc-influx-into-cells-by-the-slc39-gene-family
reactome-lipophagy	3.0167e-08	0.536521	0.942	0.797	4.22942e-05	1	reactome-lipophagy
reactome-tp53-regulates-transcription-of-genes-involved-in-cytochrome-c-release	3.03071e-08	0.478379	0.788	0.413	4.24906e-05	1	reactome-tp53-regulates-transcription-of-genes-involved-in-cytochrome-c-release
reactome-methylation	3.57368e-08	0.848535	0.994	0.9	5.0103e-05	1	reactome-methylation
reactome-microautophagy	3.60264e-08	1.02756	1	0.959	5.0509e-05	1	reactome-microautophagy
reactome-met-receptor-recycling	4.55264e-08	0.714619	0.99	0.78	6.3828e-05	1	reactome-met-receptor-recycling
reactome-nuclear-events-kinase-and-transcription-factor-activation	5.24457e-08	0.767366	1	0.981	7.35289e-05	1	reactome-nuclear-events-kinase-and-transcription-factor-activation
reactome-signal-transduction-by-l1	9.18876e-08	0.346748	0.997	0.994	0.000128826	1	reactome-signal-transduction-by-l1
reactome-dna-damage-reversal	9.43587e-08	0.344707	0.907	0.728	0.000132291	1	reactome-dna-damage-reversal
reactome-ksrp-khsrp-binds-and-destabilizes-mrna	1.12066e-07	0.705201	0.974	0.855	0.000157117	1	reactome-ksrp-khsrp-binds-and-destabilizes-mrna
reactome-signaling-by-fgfr3	1.21556e-07	0.366505	1	0.996	0.000170422	1	reactome-signaling-by-fgfr3
reactome-egfr-downregulation	1.21689e-07	0.599567	1	1	0.000170609	1	reactome-egfr-downregulation
reactome-loss-of-function-of-tgfbr1-in-cancer	1.24131e-07	0.835451	0.994	0.576	0.000174031	1	reactome-loss-of-function-of-tgfbr1-in-cancer
reactome-shc1-events-in-egfr-signaling	1.2933e-07	0.383811	0.952	0.486	0.000181321	1	reactome-shc1-events-in-egfr-signaling
reactome-receptor-mediated-mitophagy	1.47861e-07	0.336125	0.997	0.94	0.000207301	1	reactome-receptor-mediated-mitophagy
reactome-smac-xiap-regulated-apoptotic-response	2.19347e-07	0.395618	0.965	0.73	0.000307525	1	reactome-smac-xiap-regulated-apoptotic-response
reactome-trna-modification-in-the-nucleus-and-cytosol	2.4386e-07	0.316579	0.672	0.593	0.000341892	1	reactome-trna-modification-in-the-nucleus-and-cytosol
reactome-syndecan-interactions	2.78414e-07	0.982914	0.977	0.63	0.000390337	1	reactome-syndecan-interactions
reactome-activation-of-caspases-through-apoptosome-mediated-cleavage	2.991e-07	0.561841	0.961	0.527	0.000419338	1	reactome-activation-of-caspases-through-apoptosome-mediated-cleavage
reactome-coenzyme-a-biosynthesis	5.02109e-07	0.254703	0.765	0.409	0.000703957	1	reactome-coenzyme-a-biosynthesis
reactome-formation-of-the-early-elongation-complex	5.66699e-07	0.57189	1	0.977	0.000794513	1	reactome-formation-of-the-early-elongation-complex
reactome-gastrin-creb-signalling-pathway-via-pkc-and-mapk	5.82654e-07	0.990063	0.997	0.862	0.000816881	1	reactome-gastrin-creb-signalling-pathway-via-pkc-and-mapk
reactome-zbp1-dai-mediated-induction-of-type-i-ifns	6.05537e-07	1.55536	0.987	0.78	0.000848963	1	reactome-zbp1-dai-mediated-induction-of-type-i-ifns
[truncated: 1,177 more rows]

## Sheet: table s3-4 GO-based_GC-DEF
	p_val	avg_log2FC	pct.1	pct.2	p_val_adj	cluster	gene
[truncated: 9,425 more rows]

[truncated: 1 more sheets: table s3-5 pathway-based_GC-DEF]
