# Supplementary material for: FEM: mining biological meaning from cell level in single-cell RNA sequencing data
Source: PeerJ. 2021 Nov 30;9:e12570. doi: 10.7717/peerj.12570 (PMC8641482; doi:10.7717/peerj.12570)
Supplement: Supplemental Information 6 — Table S5-1 Parameters in PBMC data set. Table S5-2 Parameters in liver data set. Table S5-3 Parameters in pancreas data set. [file peerj-09-12570-s006.xlsx]

## Sheet: table s5-1 PBMC
origin								cell type
parameter	value			attributes	value			Naive_CD4_T
nFeature_RNA_max	3000			features	13714			B
scale_factor	10000			samples	2700			Memory_CD4_T
umap_pca	10			Number of communities: 9				CD14+_Mono
resolution_num	0.5							NK
FindAllMarkers-min.pct	0.25							CD8_T
FindAllMarkers-logfc.threshold	0.25							FCGR3A+_Mono
t_n	5							DC
								Platelet
reactome
parameter	value			attributes	value
nFeature_RNA_max	1400			features	1221
scale_factor	8000			samples	2700
umap_pca	20			Number of communities: 9
resolution_num	0.6
FindAllMarkers-min.pct	0.25
FindAllMarkers-logfc.threshold	0.25
t_n	5
go
parameter	value			attributes	value
nFeature_RNA_max	7600			features	7465
scale_factor	30000			samples	2700
umap_pca	15			Number of communities: 9
resolution_num	0.8
FindAllMarkers-min.pct	0.25
FindAllMarkers-logfc.threshold	0.25
t_n	5
reactome - origin
parameter	value			attributes	value
nFeature_RNA_max	3000			features	13714
scale_factor	10000			samples	2700
umap_pca	15			Number of communities: 9
resolution_num	0.8
FindAllMarkers-min.pct	0.25
FindAllMarkers-logfc.threshold	0.25
t_n	5
func_feature_max	1400
func_scale_factor	6000
t_n_f	20
FindAllMarkers-min.pct	0.25
FindAllMarkers-logfc.threshold	0.25
go - origin
parameter	value			attributes	value
nFeature_RNA_max	3000			features	13714
scale_factor	10000			samples	2700
umap_pca	10
resolution_num	0.5
FindAllMarkers-min.pct	0.25
FindAllMarkers-logfc.threshold	0.25
t_n	5
func_feature_max	6500
func_scale_factor	30000
t_n_f	20
FindAllMarkers-min.pct	0.25
FindAllMarkers-logfc.threshold	0.25
validation				attributes	value
parameter	value			features	13714
nFeature_RNA_max	3000			samples	2700
scale_factor	10000
umap_pca	10
resolution_num	0.5
FindAllMarkers-min.pct	0.25
FindAllMarkers-logfc.threshold	0.25
t_n	5
func_feature_max	6500
func_scale_factor	30000
t_n_f	20
FindAllMarkers-min.pct	0.25
FindAllMarkers-logfc.threshold	0.25

## Sheet: table s5-2 LIVER
origin									cell type
parameter	value			attributes	value				definitive_endoderm
nFeature_RNA_max	8000			features	16742				immature_hepatoblast
scale_factor	35000			samples	777				ipsc
umap_pca	15			Number of communities: 11					mature_hepatocyte
resolution_num	0.5								hepatic_endoderm
FindAllMarkers-min.pct	0.25								endothelial
FindAllMarkers-logfc.threshold	0.25								mesenchymal_stem_cell
t_n	5
reactome
parameter	value			attributes	value
nFeature_RNA_max	1400			features	1382
scale_factor	4500			samples	777
umap_pca	20			Number of communities: 8
resolution_num	0.6
FindAllMarkers-min.pct	0.25
FindAllMarkers-logfc.threshold	0.25
t_n	5
go
parameter	value			attributes	value
nFeature_RNA_max	6000			features	9249
scale_factor	20000			samples	777
umap_pca	15			Number of communities: 10
resolution_num	0.8
FindAllMarkers-min.pct	0.25
FindAllMarkers-logfc.threshold	0.25
t_n	5
reactome - origin
parameter	value			attributes	value
nFeature_RNA_max	8000			features
scale_factor	35000			samples
umap_pca	15			Number of communities: 11
resolution_num	0.5
FindAllMarkers-min.pct	0.25
FindAllMarkers-logfc.threshold	0.25
t_n	5
func_feature_max	1400
func_scale_factor	4500
t_n_f	20
FindAllMarkers-min.pct	0.25
FindAllMarkers-logfc.threshold	0.25
go - origin
parameter	value			attributes	value
nFeature_RNA_max	8000			features	16742
scale_factor	35000			samples	777
umap_pca	15			Number of communities: 11
resolution_num	0.5
FindAllMarkers-min.pct	0.25
FindAllMarkers-logfc.threshold	0.25
t_n	5
func_feature_max	6000
func_scale_factor	20000
t_n_f	20
FindAllMarkers-min.pct	0.25
FindAllMarkers-logfc.threshold	0.25

## Sheet: table s5-3 PANCREAS
origin									cell type
parameter	value			attributes	value				alpha
nFeature_RNA_max	12000			features	17577				ductal
scale_factor	30000			samples	2126				endothelial
umap_pca	20			cluster number	13				delta
resolution_num	0.8			Number of communities: 13					acinar
FindAllMarkers-min.pct	0.25								beta
FindAllMarkers-logfc.threshold	0.25								unclear
t_n	5								gamma
									mesenchymal
									epsilon
reactome
parameter	value			attributes	value
nFeature_RNA_max	1400			features	1402
scale_factor	4000			samples	2126
umap_pca	20				11
resolution_num	1.2			Number of communities: 11
FindAllMarkers-min.pct	0.25
FindAllMarkers-logfc.threshold	0.25
t_n	5
go
parameter	value			attributes	value
nFeature_RNA_max	7000			features	9538
scale_factor	20000			samples	2126
umap_pca	20				10
resolution_num	0.8			Number of communities: 10
FindAllMarkers-min.pct	0.25
FindAllMarkers-logfc.threshold	0.25
t_n	5
reactome - origin
parameter	value			attributes	value
nFeature_RNA_max	12000			features	17577
scale_factor	30000			samples	2126
umap_pca	20			Number of communities: 13
resolution_num	0.8
FindAllMarkers-min.pct	0.25
FindAllMarkers-logfc.threshold	0.25
t_n	5
func_feature_max	1500
func_scale_factor	4000
t_n_f	20
FindAllMarkers-min.pct	0.25
FindAllMarkers-logfc.threshold	0.25
go - origin
parameter	value			attributes	value
nFeature_RNA_max	12000			features	17577
scale_factor	30000			samples	2126
umap_pca	20			Number of communities: 13
resolution_num	0.8
FindAllMarkers-min.pct	0.25
FindAllMarkers-logfc.threshold	0.25
t_n	5
func_feature_max	7000
func_scale_factor	20000
t_n_f	20
FindAllMarkers-min.pct	0.25
FindAllMarkers-logfc.threshold	0.25
